# Supplementary material for: Genome-wide identification of genes regulating DNA methylation using genetic anchors for causal inference
Source: Genome Biol. 2020 Aug 28;21:220. doi: 10.1186/s13059-020-02114-z (PMC7453518; doi:10.1186/s13059-020-02114-z)
Supplement: Supplementary file 1 — Additional file 1: Table S1. The genetic instruments (GIs) and their predictive power as measured by the F-statistic and partial R2. This table also includes the power to detect various effect sizes for both the uncorrected and corrected analysis (for neighboring GIs). [file 13059_2020_2114_MOESM1_ESM.csv]

Ensembl_ID	HGNC_ID	F_statistic	Partial_R2_uncorrected	Partial_R2_corrected_nearby_GI	power_bxy0.25_uncorrected	power_bxy0.5_uncorrected	power_bxy0.75_uncorrected	power_bxy1_uncorrected	power_bxy0.25_corrected	power_bxy0.5_corrected	power_bxy0.75_corrected	power_bxy1_corrected
ENSG00000000457	SCYL3	137.615694546871	0.0583707068396151	5.80480720923208e-7	0.0018109688487211173	0.8381943252018558	0.99999966736802	1	1.3557266420605174e-11	1.3696932477103019e-11	1.3930634423786614e-11	1.4259815550587973e-11
ENSG00000000460	C1orf112	1041.90839933013	0.319416817328193	0.0398932558658341	0.9900062643733895	1	1	1	1.7245462909221132e-4	0.3553435573035951	0.9980495956292138	0.9999999997496136
ENSG00000000938	FGR	35.136627960872	0.0155807091797552	0.015407330757127	8.998654232872383e-7	0.0027136017285633862	0.21928924215880774	0.8941958375769131	8.515075092807578e-7	0.0025328509813167255	0.209458626482817	0.8856568743250901
ENSG00000000971	CFH	19.4678823148866	0.00869308395473086	0.00869308395473086	6.524027751364514e-8	7.506437315218939e-5	0.010761728949616578	0.21210516627511922	6.524027751364514e-8	7.506437315218939e-5	0.010761728949616578	0.21210516627511922
ENSG00000001036	FUCA2	64.8588197856824	0.0283863577145506	0.00146834819305722	2.2697684376793426e-5	0.08396751655840806	0.9114191879451006	0.9999812736911144	3.804122572503843e-10	1.4898309919075814e-8	4.069767561842852e-7	7.771432172565262e-6
ENSG00000001084	GCLC	148.847340804479	0.0628353453768487	0.06286374279276	0.0028538847820558377	0.9001760474752716	0.9999999714372365	1	0.002861828617241713	0.9004993680274009	0.9999999718905112	1
ENSG00000001167	NFYA	316.037531055034	0.124618633275335	0.00556385296609897	0.13125675763464462	0.9999983987991109	1	1	1.2359874013156968e-8	5.768232305469745e-6	7.000852617223829e-4	0.022787122925015835
ENSG00000001460	STPG1	175.602866340056	0.0733021607243012	0.0657510464450438	0.0072938884557577355	0.9737146889170611	0.9999999999418858	1	0.00376990671221189	0.9292401307127003	0.9999999946049225	1
ENSG00000001461	NIPAL3	175.158831158923	0.0731303614943026	0.0603511529628329	0.007191684853893432	0.9730748200184574	0.9999999999353648	1	0.002225700306561773	0.868520287089106	0.9999998863621531	1
ENSG00000001561	ENPP4	115.675143591519	0.0495253562589394	0.00711844649384375	6.538059079477243e-4	0.6434662586688449	0.9999706460545827	0.9999999999999962	2.989415881504698e-8	2.3105079869911727e-5	0.00321520711224621	0.08526155344428721
ENSG00000001629	ANKIB1	22.7781727872959	0.0101562308139407	7.32467670995624e-5	1.2480637845424525e-7	1.9271665312114994e-4	0.026459755929176043	0.377525584211021	1.9765411529704124e-11	4.376043971632271e-11	1.050887155074065e-10	2.51933363060175e-10
ENSG00000001631	KRIT1	12.0537941718667	0.00540031526271475	5.47772928512103e-4	1.1170100289170648e-8	4.902967644659917e-6	5.818879300548696e-4	0.019215245049132412	8.320100164382893e-11	8.844409649100271e-10	8.260656603198413e-9	6.743913505413701e-8
ENSG00000002016	RAD52	569.784219268494	0.204239530546164	0.203322794083943	0.6839510390943538	0.9999999999999994	1	1	0.6780653003059883	0.9999999999999992	1	1
ENSG00000002549	LAP3	2133.95199374386	0.490118402042584	0.140947534024702	0.9999974204740039	1	1	1	0.22390219921921795	0.9999999681787246	1	1
ENSG00000002587	HS3ST1	114.724061496982	0.0491381672844981	0.0491855961710055	6.2275878687168e-4	0.6328693228584703	0.99996473884032	0.9999999999999939	6.26493749117496e-4	0.6341752061386666	0.9999655198694185	0.9999999999999942
ENSG00000002726	AOC1	3755.94215663367	0.62851046047431	0.127385278413185	0.9999999995169329	1	1	1	0.14510034894845014	0.9999991560283816	1	1
ENSG00000002822	MAD1L1	629.061301030978	0.220795986665272	0.212094601602392	0.7795078182168831	1	1	1	0.7318964389417248	1	1	1
ENSG00000002919	SNX11	377.658236779156	0.145384112287002	0.0394371463240532	0.253195896200583	0.9999999896135195	1	1	1.6076797869812864e-4	0.34165672365847877	0.9976689300884871	0.9999999995909394
ENSG00000002933	TMEM176A	9753.48033272474	0.814590249592467	0.0658029995837107	0.9999999999999993	1	1	1	0.0037881757240417757	0.9296866979112848	0.9999999947650609	1
ENSG00000003056	M6PR	484.002758578873	0.178994920416889	0.121043639398317	0.5044090874205489	0.9999999999988994	1	1	0.11456154235822891	0.9999963917377234	1	1
ENSG00000003147	ICA1	157.648151911476	0.0663042392478202	0.0639414096667722	0.003968171774660356	0.9338763600196156	0.9999999960886664	1	0.0031769990305788864	0.9121634696522979	0.9999999847346436	1
ENSG00000003249	DBNDD1	1067.66083128798	0.3247478636261	0.208364895040394	0.9918845183081009	1	1	1	0.7096982798606303	0.9999999999999999	1	1
ENSG00000003393	ALS2	1178.50523757805	0.34677164082228	0.332672341270015	0.9966969865773605	1	1	1	0.9940853383930213	1	1	1
ENSG00000003400	CASP10	45.3566804634031	0.0200218715465703	0.00898958642509573	3.26052341825811e-6	0.012353751068791885	0.5135677508624059	0.9903612575288941	7.480252195435355e-8	9.183407406143651e-5	0.01311476016873414	0.24278394027857497
ENSG00000003402	CFLAR	156.498959408242	0.0658527363492769	0.0100496228618557	0.0038057329707379406	0.9301120248296177	0.9999999949139837	1	1.1929531573695584e-7	1.8067441955349484e-4	0.024932201235785767	0.3645666483592691
ENSG00000003509	NDUFAF7	21.5380844152855	0.00960861854859085	0.0017383744551126	9.863619165884074e-8	1.374336887753902e-4	0.01930808555369201	0.31204998943549567	5.33102895161619e-10	2.7383094902688754e-8	9.184953344565372e-7	2.0180400538638565e-5
ENSG00000003987	MTMR7	13.8435216138903	0.00619717606893466	0.00352166263877878	1.8000213763968986e-8	1.0483498317004347e-5	0.0013662957786073626	0.04146837515915258	2.975939383809134e-9	5.509011971049915e-7	4.32394933892466e-5	0.001455485843471993
ENSG00000004139	SARM1	23.9688176709735	0.0106814397251076	0.00523632556989121	1.5522806706691483e-7	2.625541962208988e-4	0.03502454823530021	0.44214601891290506	1.0073290979129013e-8	4.150220354715017e-6	4.807429922751849e-4	0.016079993840467655
ENSG00000004142	POLDIP2	78.3307822851683	0.0340815964738053	1.7179573496417e-4	6.656668720339542e-5	0.1951192393008938	0.9838510089031923	0.9999999003038768	2.9503732790203685e-11	1.1107303965474102e-10	4.2063141858506015e-10	1.5310155365710898e-9
ENSG00000004399	PLXND1	122.285758477616	0.0522078734565233	0.0533296141466526	9.068478936348212e-4	0.712532413134616	0.9999920079039741	0.9999999999999999	0.001034695365305871	0.7389501620489011	0.9999954322822353	1
ENSG00000004487	KDM1A	14.6066159677165	0.00653654914620889	0.00842202191035132	2.1808415517909907e-8	1.4167542013998613e-5	0.001900712239427782	0.05511690174309347	5.742252118245972e-8	6.21058164809174e-5	0.008914159299671542	0.18575234595915158
ENSG00000004534	RBM6	2065.97502771292	0.482031513098984	7.38795130919146e-6	0.9999959305957589	1	1	1	1.4105605572467539e-11	1.5937917652308897e-11	1.9154566821555363e-11	2.4012791755012586e-11
ENSG00000004660	CAMKK1	254.202209511005	0.102741080956857	0.104195650162817	0.05017315856230087	0.9998265109799235	1	1	0.05404629237823688	0.9998700608086797	1	1
ENSG00000004700	RECQL	38.9553305966271	0.0172448432551955	0.0144452938926273	1.497944551287489e-6	0.005050442224038054	0.3227850896111739	0.9528675998687429	6.217115334772316e-7	0.0017007084621464275	0.1589509594454347	0.8282444682524479
ENSG00000004766	CCDC132	20.0934779251749	0.00896992831914584	0.00815377014419906	7.413387848043129e-8	9.063061296166186e-5	0.01294730328762339	0.24069420095042404	5.047866258323097e-8	5.122314406902362e-5	0.0073429401109826875	0.16141240185486272
ENSG00000004777	ARHGAP33	628.552087474376	0.220656694409149	0.0868451406848318	0.7787926689333964	1	1	1	0.019783919381787363	0.9967808516863773	0.9999999999999915	1
ENSG00000004779	NDUFAB1	12.1406054854989	0.00543899674405068	0.00163001684521191	1.1442618519375003e-8	5.096782806801592e-6	6.082001011479266e-4	0.02001860012243195	4.673190723281095e-10	2.1609170008929368e-8	6.699807113541567e-7	1.3965794938619602e-5
ENSG00000004799	PDK4	34.7272369898689	0.0154019681051225	0.0158038353077724	8.500481484263744e-7	0.002527422567462967	0.20915791046517163	0.8853844068085297	9.65560733034998e-7	0.002961697987442724	0.23224085017260476	0.9044337137167217
ENSG00000004809	SLC22A16	4157.55559138328	0.651904249490284	0.634531954271149	0.9999999999006706	1	1	1	0.9999999996774229	1	1	1
ENSG00000004864	SLC25A13	368.019338892291	0.142201154899333	0.14101985868863	0.23202299462330922	0.9999999767561331	1	1	0.22436721927642878	0.9999999687486228	1	1
ENSG00000004975	DVL2	62.3805488270686	0.0273313531606841	7.28158713877167e-4	1.8248659211073104e-5	0.06936027818256385	0.8839493177236589	0.9999543573306279	1.2021705853015874e-10	1.7771424332124752e-9	2.201404880608493e-8	2.2808888811010064e-7
ENSG00000005020	SKAP2	4094.56526458865	0.648431854454098	0.276833592499951	0.9999999998741117	1	1	1	0.9542518818640859	1	1	1
ENSG00000005059	CCDC109B	173.07296673062	0.0723224778921262	0.0259265634851861	0.006726327426043066	0.9698784397407797	0.9999999998936335	1	1.3505035095118245e-5	0.05272057689437004	0.8376000864152956	0.9998567343092946
ENSG00000005075	POLR2J	39.5958433899885	0.0175234184050296	5.31769694235871e-6	1.6257795578678014e-6	0.0055665079589209965	0.34137431506514726	0.9592799944680738	1.3938183940354065e-11	1.5244805418035412e-11	1.7506329719196856e-11	2.085265293771954e-11
ENSG00000005102	MEOX1	470.817190165274	0.174971823387361	0.146781765073257	0.4735458250026572	0.9999999999965121	1	1	0.2627298525093351	0.9999999927340909	1	1
ENSG00000005156	LIG3	945.454612472784	0.298678935009027	0.0300233351264427	0.9783475001972148	1	1	1	3.144745697936102e-5	0.11035229366414767	0.943413576032948	0.999995534933961
ENSG00000005175	RPAP3	374.732939106179	0.144420619732551	0.0029347463287717	0.2467056842918498	0.9999999867293873	1	1	1.8125767553556216e-9	2.3599191012468879e-7	1.5008997032328608e-5	4.70051703393648e-4
ENSG00000005187	ACSM3	16.7383612628211	0.00748337917062903	0.00894163186982294	3.61404850490743e-8	3.090146527451321e-5	0.004366338272717374	0.10878603860867508	7.318028893976702e-8	8.892207835309307e-5	0.012709197588641419	0.23769955791858144
ENSG00000005194	CIAPIN1	62.0574322387166	0.0271936329743629	0.0225141208534385	1.7727604761930138e-5	0.06758918002002934	0.879917779081719	0.9999488296635841	6.145133010559967e-6	0.024330422868323875	0.6735599344038963	0.9981482600554584
ENSG00000005243	COPZ2	467.442500110862	0.173935814474758	0.100956472636182	0.4655610978548792	0.9999999999953172	1	1	0.04569383892457912	0.9997538320071829	1	1
ENSG00000005249	PRKAR2B	17.7137218739259	0.00791599108535292	0.00825303707659776	4.49282603343093e-8	4.299034243782085e-5	0.00614302255172372	0.14137315967699227	5.296073790628242e-8	5.5041588688298226e-5	0.007896236868737971	0.1702100572141937
ENSG00000005379	BZRAP1	45.8779119402736	0.0202473009240768	0.010952786776534	3.46089374159142e-6	0.013193828590654766	0.5289424693569347	0.9916279197137873	1.73273887904557e-7	3.063817471767871e-4	0.04017058337498913	0.4756461725741312
ENSG00000005381	MPO	183.787130843979	0.0764573237312617	0.0403757164874259	0.009386444256495152	0.9833024615439486	0.9999999999919669	1	1.8559872771717334e-4	0.36994261855868227	0.9983883203830879	0.9999999998515696
ENSG00000005436	GCFC2	71.3843972468794	0.0311533923913633	0.0127344182247307	3.90608982142604e-5	0.13123215406520905	0.9592878727169201	0.9999983969360171	3.423905096111568e-7	7.783505987773998e-4	0.0879460096381256	0.6808198006412507
ENSG00000005469	CROT	218.02019977814	0.0894250998404277	0.0586304134390715	0.02337974561485867	0.9979323573871258	0.9999999999999986	1	0.0018613891005927474	0.8424412226678354	0.9999997106643537	1
ENSG00000005471	ABCB4	35.454145892481	0.0157192935875235	0.0155743085690465	9.401995235691629e-7	0.0028655922566060976	0.22729468883357318	0.9006520028024836	8.980391059676407e-7	0.0027067454292123427	0.21892263654506472	0.8938898185246498
ENSG00000005486	RHBDD2	136.997299182228	0.0581236555636952	0.0345287479847576	0.0017640622016225072	0.8340771900673818	0.9999996203327645	1	7.196719999946755e-5	0.20603775848423256	0.9860990697842479	0.9999999357290801
ENSG00000005513	SOX8	77.1103553939712	0.0335684157327941	2.89270832007369e-4	6.0801224102680074e-5	0.1829496791261348	0.9808726445660094	0.999999835773731	4.328337688264128e-11	2.4643243001776227e-10	1.3357734918173492e-9	6.745764724591652e-9
ENSG00000005801	ZNF195	544.972030187366	0.197098568895989	0.196446404815368	0.6366211188172459	0.9999999999999949	1	1	0.6321369269197329	0.9999999999999938	1	1
ENSG00000005844	ITGAL	20.2208272545886	0.00902626518269156	0.00347313869288192	7.606373764179608e-8	9.411620743438043e-5	0.013431721247842088	0.24670315951475186	2.861820891375544e-9	5.155526189293269e-7	3.98416110151123e-5	0.0013355568962687414
ENSG00000005882	PDK2	249.05050048001	0.100868937444411	0.0989561285444997	0.04548172388299587	0.9997496046518094	1	1	0.041020240651416184	0.9996379085894391	1	1
ENSG00000005884	ITGA3	254.121247464251	0.102711719453807	0.101243514660418	0.05009704968063122	0.9998255019618493	1	1	0.04639434158792177	0.9997672206929914	1	1
ENSG00000005955	GGNBP2	765.92210895013	0.256511081335418	0.00225666541970541	0.9140636936314632	1	1	1	9.469733885936193e-10	7.607746899118695e-8	3.5184666143939225e-6	9.414114047956446e-5
ENSG00000006007	GDE1	201.310249808237	0.0831410389578042	0.0321896386458683	0.015378752013569419	0.9940594151930737	0.9999999999998959	1	4.738687061944802e-5	0.1522661933016607	0.9703086122203054	0.9999993881021929
ENSG00000006015	C19orf60	134.409082078374	0.0570882448175588	0.0191204151125509	0.0015782950376107552	0.8159945453140676	0.999999341895243	1	2.5559053824508737e-6	0.009404254169785076	0.4512660727080716	0.9833622537925786
ENSG00000006025	OSBPL7	52.9292650859363	0.0232868069847018	4.9039130736378e-4	7.400233225207664e-6	0.02940914217288737	0.7170526279474678	0.998932282939084	7.309230998231442e-11	6.898012161471456e-10	5.8114872913961335e-9	4.3401499616457784e-8
ENSG00000006125	AP2B1	34.2204881288798	0.0151806304259459	0.00368255000888829	7.91660408672179e-7	0.002311586154637002	0.19692611834269047	0.8736905622046547	3.3805099830530594e-9	6.834027300728351e-7	5.63518932708007e-5	0.0019191383389233208
ENSG00000006282	SPATA20	13717.3915968667	0.860704934900611	0.843590117117843	1	1	1	1	0.9999999999999999	1	1	1
ENSG00000006432	MAP3K9	742.062666969507	0.250522271268728	0.131453629612891	0.8978196956442391	1	1	1	0.16688522018421392	0.9999996767118637	1	1
ENSG00000006453	BAIAP2L1	87.2754220334355	0.0378261828648608	0.0159651855409848	1.2474117394056794e-4	0.2944729441816457	0.995695217391863	0.9999999977471937	1.0156002953065624e-6	0.003152463417862572	0.24180823457761202	0.9113304641500213
ENSG00000006459	KDM7A	37.3083348613318	0.0165277974148019	0.0150479748129993	1.2079528713959675e-6	0.003898039838760914	0.2763846673967211	0.9322880099402066	7.583465434501946e-7	0.002189686547738212	0.18976727828182682	0.8662541993204719
ENSG00000006530	AGK	67.9085689977613	0.0296815047235516	0.0100512202404178	2.9412911817350285e-5	0.10446506291119217	0.9376849320968774	0.9999939463957461	1.1937633959124838e-7	1.8084999738554597e-4	0.024954589050802167	0.36476021297453587
ENSG00000006534	ALDH3B1	46.4282057456999	0.0204851870568845	0.00759629793886457	3.6837749877172143e-6	0.014127976611648774	0.5450307534601045	0.9927979006366608	3.828136230232815e-8	3.3732198707503436e-5	0.004783629316645777	0.11680188294641092
ENSG00000006607	FARP2	608.374414890817	0.215096845625476	0.176868997274528	0.7489936209083679	1	1	1	0.4881338424969589	0.9999999999979717	1	1
ENSG00000006625	GGCT	50.0786894382076	0.0220603319484934	0.0220835226598199	5.49739272459604e-6	0.021673242510101387	0.646460513286904	0.9974626198066621	5.529003183180059e-6	0.021803450369806465	0.6478715816438727	0.9975027587465422
ENSG00000006634	DBF4	27.1656807310338	0.0120888641918901	0.00914228326652633	2.695912350025864e-7	5.637804398663793e-4	0.06766966972615207	0.6110168912225029	8.017216546196693e-8	1.0165792675376206e-4	0.01447374370926613	0.259267510303259
ENSG00000006638	TBXA2R	65.6649365899265	0.0287290300248008	0.00446207246967784	2.4330743956912926e-5	0.08911337892141802	0.919118278760329	0.9999860582303058	6.012842557190368e-9	1.7866365125129846e-6	1.795829549191552e-4	0.006221217257362688
ENSG00000006652	IFRD1	525.123258720486	0.191293143960774	0.179247214661491	0.595851953234408	0.9999999999999704	1	1	0.5063343827471379	0.9999999999989767	1	1
ENSG00000006695	COX10	70.9283036187521	0.0309605078023235	0.0306897255878229	3.7659118970800876e-5	0.1275149587750405	0.9568861611358507	0.9999980869401013	3.576442570807359e-5	0.1224026740434081	0.9533096878140135	0.9999975513191848
ENSG00000006715	VPS41	219.047518708359	0.0898086310447776	0.0872069708474568	0.023953822811879966	0.998066159565567	0.9999999999999989	1	0.020261006135632642	0.9969722922935027	0.9999999999999932	1
ENSG00000006744	ELAC2	721.26997680934	0.245223995925653	0.245491031866717	0.8814959769606605	1	1	1	0.8823646173749929	1	1	1
ENSG00000006831	ADIPOR2	86.1764289972571	0.0373676653328415	0.0349075867685694	1.1584990790514116e-4	0.2814458044923335	0.994898384939165	0.999999996368269	7.68329610515428e-5	0.215509599523093	0.9877782753882003	0.9999999558233149
ENSG00000007038	PRSS21	57.9305533732071	0.0254312201429593	0.035814237558772	1.2108251033926543e-5	0.04758616171759111	0.818374647390165	0.9997881240636339	8.963886047153036e-5	0.23895992256141863	0.9910760965929413	0.9999999821836699
ENSG00000007047	MARK4	2477.82780986848	0.527441172846616	0.504693009327598	0.999999706616532	1	1	1	0.9999988813315525	1	1	1
ENSG00000007080	CCDC124	23.6150059633589	0.0105254270008856	0.0102429850805589	1.455964633301221e-7	2.398623721808768e-4	0.032293685309273235	0.4228711165396243	1.2944933469594133e-7	2.030155233969655e-4	0.027753655715499814	0.3881254128068802
ENSG00000007129	CEACAM21	6369.64199940782	0.741549182125047	0.680974642817372	0.9999999999998291	1	1	1	0.9999999999867267	1	1	1
ENSG00000007168	PAFAH1B1	35.6487023049338	0.0158041907272645	0.0143499475875628	9.656685832082346e-7	0.002962107537146652	0.23226174246447617	0.9044493654525377	6.021643697007306e-7	0.0016323933367885513	0.15434157197565057	0.8215767975595197
ENSG00000007237	GAS7	298.401503738329	0.118488455194845	0.118236103485558	0.10346255718535324	0.9999936193414838	1	1	0.10240425004093179	0.9999932531364074	1	1
ENSG00000007255	TRAPPC6A	121.319895188994	0.0518168813404293	6.0553600149104e-4	8.65525972962633e-4	0.7029695667911823	0.9999903075366852	0.9999999999999998	9.416190049904571e-11	1.119764725387995e-9	1.1519870835030588e-8	1.0213809675807539e-7
ENSG00000007264	MATK	14.7511218983274	0.0066007895706064	3.44463190417188e-5	2.2599666804623553e-8	1.4978089383110849e-5	0.002019171912503004	0.058015598340034	1.6352252885099006e-11	2.5963786676186373e-11	4.598044167636317e-11	8.381806360091559e-11
ENSG00000007341	ST7L	493.232851016529	0.181787881136607	0.0400955310582809	0.5256344952905622	0.9999999999995101	1	1	1.7786516899354066e-4	0.36145029434013565	0.9981990233633837	0.9999999997988125
ENSG00000007372	PAX6	147.092928354565	0.0621407493523345	0.0494868167773714	0.0026651480117316773	0.8920041705518024	0.9999999578215392	1	6.506582558322149e-4	0.6424180517807774	0.9999701038850534	0.999999999999996
ENSG00000007376	RPUSD1	33.0576741653861	0.0146723603858174	1.49368241705094e-4	6.704703747750784e-7	0.0018730098337557122	0.17022494545034894	0.8433949425026165	2.7147617487344178e-11	9.258316335802874e-11	3.2210045741720705e-10	1.0843366204937865e-9
ENSG00000007516	BAIAP3	1608.2066036192	0.420093994430394	0.252123156570506	0.999889939050644	1	1	1	0.9023844170197738	1	1	1
ENSG00000007520	TSR3	39.5404627395142	0.0174993382024124	0.0184364217447359	1.6143703417403898e-6	0.005520284575947221	0.33975708412228167	0.9587570625099139	2.1129284744070276e-6	0.0075631195912106985	0.403774413795268	0.9753049989214126
ENSG00000007541	PIGQ	200.776275885905	0.0829387985523069	0.00101994190888767	0.015162212842809941	0.9938622297696128	0.9999999999998809	1	1.994979736963387e-10	4.569988054647922e-9	8.152836317165679e-8	1.133223742288969e-6
ENSG00000007545	CRAMP1L	144.572388412661	0.0611410287632227	0.0340225976907606	0.002411633620599485	0.8793280728029289	0.9999999264518247	1	6.588082882796886e-5	0.19370025268306523	0.9835311828304257	0.999999894388485
ENSG00000007944	MYLIP	10.5220950198197	0.00471732382445923	0.0047278644254429	7.1669365997450996e-9	2.3847770337370733e-6	2.525274489882934e-4	0.008691075918597968	7.218209918669061e-9	2.4127984605826214e-6	2.5601457452062437e-4	0.00880771568264005
ENSG00000007968	E2F2	12.8332950934885	0.00574753839513631	0.00183143397364199	1.3818839517121262e-8	6.894438053461904e-6	8.563406898322024e-4	0.02737396406835413	5.948196379890192e-10	3.332018083668231e-8	1.1915323013811374e-6	2.7293095696712122e-5
ENSG00000008018	PSMB1	2025.81375785035	0.477132034843662	0.462984158599162	0.9999946506283737	1	1	1	0.9999883544133336	1	1	1
ENSG00000008083	JARID2	356.688977634564	0.138429193717439	0.139640804570825	0.20798526126276307	0.9999999405227792	1	1	0.21557565363624187	0.999999955937876	1	1
ENSG00000008128	CDK11A	228.374917566547	0.0932761220220022	0.0597032505613328	0.029636789500358196	0.9989569187852624	0.9999999999999999	1	0.002082176015165582	0.859115419454274	0.9999998380876549	1
ENSG00000008226	DLEC1	23.8164919612284	0.0106142779708386	0.00769476500883406	1.5101734585076798e-7	2.5257121276012207e-4	0.03382898365755005	0.43384564521671676	4.0234118703352806e-8	3.638021831064986e-5	0.005173375309079464	0.12407554907318052
ENSG00000008256	CYTH3	103.791734126988	0.0446648176782423	0.0309028920243827	3.4508430014590363e-4	0.5018455092004025	0.9997307957380702	0.9999999999987875	3.7248895761843315e-5	0.12641679354353474	0.9561455357187211	0.9999979835108922
ENSG00000008277	ADAM22	31.4540791656676	0.0139705621610207	0.0139094962471114	5.295179050790466e-7	0.0013827254490785812	0.13674696288311317	0.7932273129616867	5.185583957789675e-7	0.0013456850647641794	0.13402791891438415	0.7883908338406505
ENSG00000008294	SPAG9	44.9298834549102	0.019837207227967	0.0170343390918827	3.103926136671653e-6	0.011697282562241118	0.5008947252030869	0.9891960449135633	1.4071830215511838e-6	0.004686752028951302	0.30892916228777334	0.947466626592735
ENSG00000008300	CELSR3	72.5072863231612	0.0316279414925882	0.00159182402906526	4.2702369840053045e-5	0.14064340448261814	0.9647109079932651	0.999998965795651	4.4561243583984833e-10	1.9833313880113224e-8	5.974221801707813e-7	1.2210698796422115e-5
ENSG00000008323	PLEKHG6	14.4918813679426	0.00648553771386754	1.44559897456175e-4	2.1196653321453596e-8	1.3551154921631614e-5	0.0018108023643921278	0.052888194947793954	2.665345721908352e-11	8.888167979392847e-11	3.0334135203702317e-10	1.0032868980047738e-9
ENSG00000008382	MPND	236.613901428472	0.0963170896700071	0.0458753410210447	0.03539481178006709	0.9994038257134906	1	1	4.070310175176006e-4	0.5385466380407273	0.9998421855319464	0.9999999999997029
ENSG00000008394	MGST1	46.0734590375988	0.0203318470784112	0.0202994634644215	3.5387348313875577e-6	0.013520139702629996	0.5346775322799314	0.9920623248906852	3.508742760560679e-6	0.0133944183764374	0.5324829858914644	0.9918984342345978
ENSG00000008405	CRY1	21.1040621071612	0.00941681489226271	0.0094701488995639	9.06481578688556e-8	1.2159552459367617e-4	0.017189422767838525	0.28993502747018507	9.281223156687446e-8	1.2583408054245293e-4	0.017759679139861984	0.2960320100216123
ENSG00000008438	PGLYRP1	496.985684264657	0.182918035653605	0.184585493130452	0.5341613299480155	0.9999999999996476	1	1	0.5466662099319202	0.9999999999997837	1	1
ENSG00000008513	ST3GAL1	240.496398214924	0.09774304013995	0.10073332832513	0.038359597698886194	0.9995439511817353	1	1	0.045154503491467435	0.9997429183477793	1	1
ENSG00000008516	MMP25	2016.07005717353	0.475929347240006	0.356509717718887	0.9999942809982042	1	1	1	0.997822580046648	1	1	1
ENSG00000008517	IL32	512.629340346716	0.187595636472846	0.130426732628134	0.5689795372459525	0.999999999999911	1	1	0.1612290517835685	0.9999995872975903	1	1
ENSG00000008710	PKD1	19.9781442180957	0.00891890140520522	0.00554231148309999	7.24218019998446e-8	8.756970079504267e-5	0.012520418112797582	0.2353055402427553	1.2197438614691691e-8	5.647216007265143e-6	6.83446566514978e-4	0.02228991142584802
ENSG00000008838	MED24	314.9791154771	0.124253140214853	0.0389251687490908	0.12948783204080894	0.9999982587514503	1	1	1.4846256008116399e-4	0.3264489509035452	0.9971592962188984	0.9999999992931813
ENSG00000008853	RHOBTB2	25.3040062570963	0.0112697461842942	0.0110949521246819	1.9658827965507442e-7	3.6530851654670293e-4	0.04684787224799314	0.5144733369959725	1.8342137353410948e-7	3.317261393785964e-4	0.04307469565058908	0.49312094263856854
ENSG00000008869	HEATR5B	48.4404719303504	0.0213540855621966	0.00322183992482856	4.60654507872249e-6	0.01798330221336275	0.6022470764001486	0.9959093461173479	2.325060255436995e-9	3.6191046748346167e-7	2.5675175415074136e-5	8.381817622291621e-4
ENSG00000008988	RPS20	112.629076617069	0.0482841776029007	0.0434881151828395	5.586522189811038e-4	0.6089995864333944	0.999947378166251	0.999999999999983	2.927321977125308e-4	0.4656894743430363	0.9995529414206392	0.9999999999953392
ENSG00000009307	CSDE1	11.192703837086	0.00501646667176592	0.00232360259717886	8.742950252660364e-9	3.298821588226808e-6	3.6878455270639154e-4	0.012514322319293392	1.0142156003922764e-9	8.584253652355045e-8	4.115276988292393e-6	1.1232748453771091e-4
ENSG00000009335	UBE3C	55.9679613348766	0.024590838836787	0.0254732646232935	1.0022710664414625e-5	0.03970400839646848	0.7821719066770847	0.9995945714469943	1.2221753615482278e-5	0.048007627329770375	0.8200668765432444	0.9997949943183658
ENSG00000009724	MASP2	37.2363192082748	0.0164964203753976	0.0131991760929888	1.1964553614518536e-6	0.003852989144186414	0.27440998551481777	0.931238457073556	4.0467648532160894e-7	9.721949963169552e-4	0.1047470488747374	0.7265902993831883
ENSG00000009780	FAM76A	12.6985217993324	0.00568752192709773	0.00615772426172313	1.3327311809696596e-8	6.507257896526397e-6	8.023538494642546e-4	0.025805490551721322	1.7595854329144345e-8	1.011455893384916e-5	0.0013132611897967994	0.04005674734433651
ENSG00000009790	TRAF3IP3	600.337481665906	0.212860157895466	0.113330752489818	0.7363222360157955	1	1	1	0.08317953046479609	0.9999803929248622	1	1
ENSG00000009830	POMT2	354.859730446616	0.137817111452927	0.108562887033745	0.2041994663188641	0.9999999308355553	1	1	0.06691695531451691	0.9999465388049501	1	1
ENSG00000010030	ETV7	2921.99377984354	0.56826085463146	0.488535617216965	0.9999999759487106	1	1	1	0.9999971784957047	1	1	1
ENSG00000010072	SPRTN	43.4333805197411	0.019189157893292	0.0106337957610379	2.604557705288002e-6	0.009607346625464919	0.45604344982807965	0.9840245923111236	1.5223087324045537e-7	2.5543845743114524e-4	0.03417329280021064	0.43625757923453956
ENSG00000010165	METTL13	477.732948475771	0.177086819785365	0.173601366906352	0.48980528622535646	0.9999999999980945	1	1	0.46298134516162825	0.999999999994851	1	1
ENSG00000010219	DYRK4	130.701349267518	0.0556010015088667	0.0472402717871853	0.0013401496711761274	0.7876519293524085	0.9999985673380024	1	4.879426199629888e-4	0.5789770136055015	0.9999148181725191	0.9999999999999406
ENSG00000010270	STARD3NL	293.399990838041	0.116734300910144	0.117105083725055	0.09624664488031653	0.9999906128462835	1	1	0.09774453511780434	0.9999913453330554	1	1
ENSG00000010278	CD9	951.787183740822	0.300079144218711	0.147640782431493	0.9794100511701496	1	1	1	0.26865701526622643	0.9999999941729549	1	1
ENSG00000010292	NCAPD2	732.076126108285	0.247986872572077	0.0585458665770559	0.890245337233369	1	1	1	0.0018448487219829834	0.8410677554181824	0.9999996972124294	1
ENSG00000010295	IFFO1	334.091317428046	0.130806332235792	0.0430171847825725	0.16330766724796597	0.9999996228598617	1	1	2.737615415771e-4	0.4511502511912401	0.9994541649075079	0.9999999999920565
ENSG00000010310	GIPR	56.5791123853946	0.0248526888776165	0.00700711023194016	1.0636365969984851e-5	0.04205081313081038	0.7939396036159334	0.9996681149125668	2.817913291597307e-8	2.1093771942148898e-5	0.002918363184506112	0.07880403622035914
ENSG00000010327	STAB1	354.005265547223	0.137530901853832	0.0124540997755795	0.20244062291903475	0.9999999257904713	1	1	3.0894559965854995e-7	6.779934965149836e-4	0.07870919492576789	0.6513341290391836
ENSG00000010361	FUZ	149.966499093711	0.0632778982956338	0.0529061306267671	0.002979763140423919	0.9051204844769152	0.9999999777515165	1	9.847635214849104e-4	0.7291565979788983	0.9999943522457571	0.9999999999999999
ENSG00000010539	ZNF200	210.438651514717	0.0865846382847664	0.0711890711736148	0.01944577985601148	0.9966361054630237	0.9999999999999898	1	0.006114483882955768	0.9648356974656797	0.9999999997872341	1
ENSG00000010610	CD4	183.70352682928	0.076425201685169	0.0208261855199471	0.009362977853102028	0.9832232465397309	0.9999999999918014	1	4.0248284347566e-6	0.015555775910021552	0.5678029753813745	0.9942147331462244
ENSG00000010626	LRRC23	2018.65926929187	0.476249479149362	0.126744183467684	0.9999943817419825	1	1	1	0.14182155533662444	0.9999990201494724	1	1
ENSG00000010704	HFE	31.4405524265807	0.0139646380592614	4.1712917964684e-4	5.284460742327468e-7	0.001379095284027243	0.13648180007063992	0.7927614461383754	6.125833174053241e-11	4.899691763426972e-10	3.574149753937661e-9	2.3531268711352027e-8
ENSG00000010803	SCMH1	49.5947868251221	0.0218518244371274	0.0144727730751679	5.220120438353959e-6	0.020528887218945635	0.6336525706753156	0.9970736641288639	6.274452417631693e-7	0.0017208321024418938	0.16029318027319006	0.8301323533129525
ENSG00000011007	TCEB3	975.322988537627	0.305234554389756	0.0739120546278771	0.982932955320114	1	1	1	0.007666131868828696	0.9758792207336252	0.9999999999602072	1
ENSG00000011021	CLCN6	529.32927817491	0.192530331807435	0.074546451060686	0.6046947411971622	0.9999999999999796	1	1	0.00806926229039473	0.9779618387940407	0.999999999973216	1
ENSG00000011028	MRC2	70.6231497788088	0.0308314136201882	0.0295000041014514	3.674532401742869e-5	0.1250622097498636	0.9552115544963873	0.9999978476028821	2.8379510462639423e-5	0.10142031125109607	0.9344508072861151	0.9999928921019677
ENSG00000011114	BTBD7	46.8671946035471	0.0206748744324846	0.0219007506682043	3.870272238692962e-6	0.014909052200002937	0.5577438071370275	0.9936211318779556	5.28407344113635e-6	0.02079318315305012	0.6366772496724131	0.9971696322302158
ENSG00000011132	APBA3	50.7392527940486	0.0223448168835837	0.029172997435052	5.896158501772497e-6	0.023311843909500918	0.6635776733350391	0.9979157997495209	2.659647107872143e-5	0.09607664764842305	0.9282711625713234	0.9999905255314236
ENSG00000011260	UTP18	184.597656461677	0.0767686252898162	0.0535808610998485	0.009616283473696363	0.9840529353862247	0.9999999999934088	1	0.0010653089180088227	0.7446560153215371	0.9999959751006425	1
ENSG00000011275	RNF216	157.908264105211	0.0664063734034042	0.0586626693165264	0.004005689327784889	0.9347040602922924	0.9999999963148323	1	0.0018677318136917087	0.842962911127961	0.9999997156408672	1
ENSG00000011295	TTC19	1336.23093677311	0.375743578111267	0.0441100001258294	0.9990748344671639	1	1	1	3.194877125373141e-4	0.4848396965875741	0.9996575555700785	0.9999999999977065
ENSG00000011376	LARS2	453.484072162424	0.169622881574016	0.144477261324035	0.4322581216009239	0.9999999999842055	1	1	0.24708532688853435	0.9999999869188128	1	1
ENSG00000011454	RABGAP1	36.7083977427748	0.0162663451686942	0.014592238587466	1.1149892775730308e-6	0.0035354578410584647	0.26009218048740723	0.9231235716244102	6.52903580311559e-7	0.0018106325036110205	0.16619953820576772	0.8381653853482698
ENSG00000011478	QPCTL	56.7527781602255	0.024927071004207	0.0100207694441325	1.0816490332077322e-5	0.04273526019043794	0.7972017772958128	0.9996865651194261	1.1783980324864274e-7	1.77527926724097e-4	0.02453040402420581	0.3610737197601418
ENSG00000011485	PPP5C	3668.94352456592	0.623022365431219	0.618563309774511	0.9999999993034323	1	1	1	0.9999999990635413	1	1	1
ENSG00000011523	CEP68	22.2712542553812	0.00993245318251076	0.010418386420349	1.1347802231220783e-7	1.6818607907076455e-4	0.023330808874756248	0.35042518457978966	1.3928646136474043e-7	2.2527895546609056e-4	0.030512981468855505	0.4096705370817666
ENSG00000011590	ZBTB32	125.211212666653	0.0533901646002623	0.00953091719102613	0.0010420049771274753	0.740332422629673	0.9999955692711592	1	9.533115852278229e-8	1.3081701327954942e-4	0.018427009149060813	0.30302909681715107
ENSG00000011600	TYROBP	36.8443719034074	0.0163256148107072	0.00122141741211774	1.1355048089578546e-06	0.0036151343022142735	0.2637527343824777	0.9252858485168465	2.708508972659729e-10	8.02231370222728e-9	1.7607728342028395e-7	2.8675886750706425e-6
ENSG00000011638	TMEM159	262.648297594213	0.105793598653796	0.106887210937529	0.05853666388472312	0.9999057829126429	1	1	0.06175448292062613	0.9999245657879756	1	1
ENSG00000012061	ERCC1	107.361515079569	0.0461301410992433	0.0453888984034041	4.2120491611175037e-4	0.5461810897487731	0.9998591832125986	0.9999999999997796	3.8109193190327684e-4	0.523877167487295	0.9998041212313967	0.9999999999994759
ENSG00000012124	CD22	20.1587472758902	0.00899880300911883	0.00883830203351282	7.511776278779081e-8	9.240301230206693e-5	0.013193850940913854	0.24376630384032438	6.978560873616146e-8	8.291555422879071e-5	0.011868645415095691	0.22690141180591672
ENSG00000012660	ELOVL5	73.6691654818034	0.0321184792429856	0.0298332216414744	4.676998285668699e-5	0.15076506530695266	0.9696454442946624	0.9999993458007596	3.030145948235141e-5	0.10705338418807497	0.9402848608139024	0.9999947096567624
ENSG00000012779	ALOX5	102.828688197826	0.0442687352366076	0.0260013630636597	3.2664052399578036e-4	0.48971415563872356	0.9996802528579829	0.999999999998088	1.3727593076051647e-5	0.05352833215424979	0.8403691271866909	0.9998650294109025
ENSG00000012963	UBR7	282.45112406721603	0.112869786486839	0.105164699377934	0.08150391706383753	0.9999783641617637	1	1	0.05673966410531617	0.999893023865579	1	1
ENSG00000013016	EHD3	91.9825040153366	0.0397851211484455	0.0394816408532463	1.696203163196186e-4	0.35208787873126146	0.9979650176870426	0.999999999718626	1.6187740164574915e-4	0.34298647642454183	0.9977089204939237	0.9999999996100071
ENSG00000013288	MAN2B2	1082.99881567149	0.327883501057605	0.310067586847575	0.9928323652606942	1	1	1	0.9857342901065719	1	1	1
ENSG00000013306	SLC25A39	129.512108052612	0.0551229796214832	0.0153932565149208	0.001270295256712628	0.7779446914373529	0.9999981660708931	1	8.476820116953832e-7	0.002518624581941964	0.20866983315537202	0.8849407041093272
ENSG00000013364	MVP	118.776659799678	0.0507858068883976	0.0303835264432287	7.640679289571128e-4	0.6769056136609501	0.9999839658083579	0.9999999999999992	3.372136519919078e-5	0.11677168952715278	0.9489627307763704	0.9999967690365932
ENSG00000013374	NUB1	103.414783257304	0.0445098240755455	0.0413120043415026	3.377643406302644e-4	0.4971041086582667	0.9997120002669523	0.9999999999985506	2.1355991072458114e-4	0.3985518080554601	0.9988939216090859	0.9999999999467623
ENSG00000013392	RWDD2A	94.1235032865008	0.0406735004215753	0.0417102856909883	1.9413092176101543e-4	0.3790066895072073	0.9985689111736917	0.9999999998927123	2.2649994916967842e-4	0.41080203728387055	0.9990599121704392	0.9999999999657248
ENSG00000013503	POLR3B	129.04128727529	0.0549335969419968	0.048389739715093	0.0012434743274604143	0.7740185042973198	0.9999979784518637	1	5.662610700131188e-4	0.6119855782955592	0.9999499036022284	0.999999999999985
ENSG00000013523	ANGEL1	504.293663388304	0.185109876429803	0.10647899322074	0.5505785576153526	0.9999999999998146	1	1	0.06053947291360551	0.9999180200088138	1	1
ENSG00000013561	RNF14	172.518797236468	0.072107603683507	0.0384183507526759	0.006606712466716402	0.9689741704671377	0.9999999998786319	1	1.370835341071297e-4	0.31158005040703896	0.9965538929062376	0.9999999987906043
ENSG00000013573	DDX11	16912.97979122	0.88396998145481	0.883413086240956	1	1	1	1	1	1	1	1
ENSG00000013725	CD6	80.6245047404806	0.0350446170482633	0.00271340449301616	7.866118078203588e-5	0.218984291687376	0.9883388984118554	0.9999999614511721	1.481632150301948e-9	1.6648209988368023e-7	9.640450381320775e-6	2.896939032654977e-4
ENSG00000013810	TACC3	1082.73394191413	0.327829598434629	0.00689205550754057	0.9928169681834882	1	1	1	2.64939774563544e-8	1.9175773747326375e-5	0.002635634534814857	0.07247912342679963
ENSG00000014123	UFL1	90.1462215255138	0.0390218682633801	0.0389381594164387	1.507229535248067e-4	0.32930762106409683	0.9972628887712024	0.9999999993623375	1.487645266244897e-4	0.32683259877688065	0.9971734225820581	0.9999999993028847
ENSG00000014138	POLA2	183.167377335561	0.0762191510516599	3.75239795343697e-4	0.009213552764488209	0.9827070459311305	0.999999999990657	1	5.5006665888868156e-11	3.9691427922150524e-10	2.6463405911059112e-9	1.6089811261110754e-8
ENSG00000014164	ZC3H3	601.231107393235	0.213109484656421	0.0685471654285843	0.7377539064791061	1	1	1	0.00486100995000871	0.9501575972512325	0.999999998956282	1
ENSG00000014216	CAPN1	498.267296940066	0.183303274663592	0.063043310930905	0.5370587082421878	0.9999999999996851	1	1	0.0029124823322285165	0.902524562827796	0.9999999745975672	1
ENSG00000014257	ACPP	735.748215354107	0.248921140011908	0.247095341792695	0.8930862858450129	1	1	1	0.8874793064251023	1	1	1
ENSG00000014641	MDH1	29.9843504126665	0.0133264706517479	0.00318536557507901	4.233398661623866e-7	0.001031842248067183	0.109674423710861	0.7384071768232199	2.2542891997545667e-9	3.4326931541706074e-7	2.403410644680193e-5	7.810250577525713e-4
ENSG00000014824	SLC30A9	27.2646385347017	0.0121323666412867	0.0123722871258716	2.740411555457456e-7	5.76466925957364e-4	0.06892624883002296	0.6159229861290727	2.997282753103292e-7	6.508483321637781e-4	0.07613917276584536	0.6424815124786746
ENSG00000014914	MTMR11	34.0553768824109	0.0151084916686976	0.00279692061047297	7.733915359242616e-7	0.002244620379726947	0.19301683327561858	0.8696870298237801	1.600429899717426e-9	1.9030962006283403e-7	1.142908792006736e-5	3.4919941913114094e-4
ENSG00000014919	COX15	20.9158182106282	0.00933360282463865	0.0117023304923389	8.735716783281333e-8	1.1522674507891129e-4	0.01632796887577248	0.2805089544707504	2.3268873683424118e-7	4.61045066898369e-4	0.05718257861321263	0.5663423617223247
ENSG00000015133	CCDC88C	19.0647394731375	0.00851459948300716	0.00815355986183893	5.999838159631565e-8	6.629627689780371e-5	0.00951442168334371	0.19456067924456744	5.04735105932852e-8	5.1215303687568436e-5	0.007341801860387576	0.16139403146621867
ENSG00000015153	YAF2	12.6332759722129	0.00565846442771109	4.09795487606705e-4	1.309457287046456e-8	6.326648655408107e-6	7.772619068436848e-4	0.025070766802560596	6.013745057487085e-11	4.726403712851379e-10	3.395367875747013e-9	2.2054431725315737e-8
ENSG00000015475	BID	88.4179651082325	0.0383024072956766	0.0149633436500934	1.3458798069077016e-4	0.30820698662873813	0.9963994632175024	0.9999999986333191	7.377287752907691e-7	0.0021147304560363844	0.18526919628508598	0.8613385817436424
ENSG00000015532	XYLT2	24.2101397503802	0.0107878221034475	0.00312200630526645	1.6210218178880353e-7	2.7905394964655716e-4	0.03698109615652356	0.45529247834195363	2.1353996348949522e-9	3.1283827617301085e-7	2.1397839679027086e-5	6.895263350970016e-4
ENSG00000015676	NUDCD3	405.061535362203	0.154305539091415	0.136159280348747	0.3161951469435389	0.999999998976625	1	1	0.19411394252655023	0.9999998961499135	1	1
ENSG00000016864	GLT8D1	10.2661537854632	0.00460310701843287	1.49921062449216e-4	6.630114346428684e-9	2.0986766762209896e-6	2.1726060336724196e-4	0.007504198230682935	2.720468295080991e-11	9.301459602539808e-11	3.243083579462791e-10	1.0939660288755704e-9
ENSG00000017797	RALBP1	2171.09391461117	0.494431218468581	0.492024204826459	0.9999979817774688	1	1	1	0.999997685109377	1	1	1
ENSG00000018189	RUFY3	69.5410415346851	0.0303733544291792	0.0186402944680135	3.365525730747443e-5	0.11658736550695237	0.948812605746295	0.9999967392566901	2.2374311487993737e-6	0.008078817149374196	0.4179026129538451	0.9780082269705266
ENSG00000018280	SLC11A1	775.078462234426	0.258784025863614	0.228701441594732	0.9196525394808528	1	1	1	0.817567792103906	1	1	1
ENSG00000018510	AGPS	150.7582333882	0.063590724378817	0.0452288304008596	0.0030714629092931656	0.9084955919994798	0.9999999813659136	1	3.728692105841036e-4	0.5190253757734795	0.9997897773014438	0.9999999999993687
ENSG00000018699	TTC27	232.583534710731	0.0948320542069379	0.079137560068081	0.03248890519354308	0.9992149284816438	1	1	0.011514647890563001	0.9888399791066798	0.999999999998559	1
ENSG00000018869	ZNF582	14.024539171924	0.00627770148716557	0.00353077476133183	1.8849517058328047e-8	1.1272753319802042e-5	0.0014801000564389488	0.04446013613609556	2.9977672566516844e-9	5.577659584199424e-7	4.390462537740003e-5	0.001478977686732108
ENSG00000019102	VSIG2	69.457172479385	0.0303378343627917	0.0293240347107002	3.342528728877969e-5	0.11594509999598746	0.9482854320038987	0.9999966331572493	2.7407633058640357e-5	0.09852208427125653	0.9311828647701325	0.9999917007929727
ENSG00000019169	MARCO	3184.45891051827	0.589228073197228	0.586835331772745	0.9999999936506562	1	1	1	0.9999999925969485	1	1	1
ENSG00000019991	HGF	84.2434341816321	0.0365601276896127	0.0365565128586497	1.015067954205362e-4	0.25902133883247236	0.9931558157332787	0.9999999916536564	1.0144618427532226e-4	0.25892254933573944	0.9931469120008898	0.9999999916227263
ENSG00000019995	ZRANB1	19.0602227566564	0.00851259942137244	0.00824440308488292	5.994172003198628e-8	6.620324234263286e-5	0.00950112400425196	0.1943682372504224	5.274085168593956e-8	5.470002938878782e-5	0.007846831254763265	0.16943496341326658
ENSG00000020181	GPR124	492.341200316605	0.181518903395758	0.165225276269694	0.5235994518880847	0.9999999999994702	1	1	0.3983772212671499	0.9999999999464275	1	1
ENSG00000020256	ZFP64	172.472229132731	0.0720895427886541	0.0705270527687974	0.006596736707328854	0.9688970921030635	0.9999999998772797	1	0.005778361534147347	0.9615626705352334	0.9999999996819797	1
ENSG00000020577	SAMD4A	102.016811480905	0.0439345705752414	0.0368772723508919	3.1173788236982247e-4	0.47944538230427935	0.9996306854188105	0.999999999997197	1.0694678222700205e-4	0.26774509385163103	0.9938968438890327	0.9999999939721218
ENSG00000020922	MRE11A	1428.96294539597	0.391607962804594	0.342580425898982	0.9995574670880166	1	1	1	0.9960622229751743	1	1	1
ENSG00000021300	PLEKHB1	238.432229102308	0.0969854797215097	0.0692120446071317	0.03676289675216471	0.9994739561024485	1	1	0.005154866942719383	0.9542736375384377	0.9999999992981324	1
ENSG00000021355	SERPINB1	123.302229570739	0.0526190040767068	0.0411223526079112	9.520712239522444e-4	0.7223918327421228	0.9999934828019522	0.9999999999999999	2.0762324168177582e-4	0.3927327634530736	0.9988054918142834	0.9999999999343998
ENSG00000021762	OSBPL5	642.079816189465	0.224340290077696	0.21795022464123	0.7971855465542586	1	1	1	0.7645916375645752	1	1	1
ENSG00000022556	NLRP2	2939.44971646776	0.569721555204952	0.208890958098736	0.9999999780577995	1	1	1	0.7128924406637578	0.9999999999999999	1	1
ENSG00000022567	SLC45A4	859.929841305	0.279204360363169	0.24157000760201	0.9576736090752483	1	1	1	0.8691038362178043	1	1	1
ENSG00000022840	RNF10	34.2160783864251	0.0151787039026521	5.65307721344791e-6	7.911677460947786e-7	0.0023097765929799285	0.19682121720202472	0.8735848879704015	1.3965273382154919e-11	1.535638283201024e-11	1.7769785642940406e-11	2.1352808410313173e-11
ENSG00000023041	ZDHHC6	128.041272083575	0.0545310994341916	0.0414945852779466	0.0011880393477827766	0.7655229998704149	0.9999975155044082	1	2.1941139799985798e-4	0.40416302793770476	0.9989731858648203	0.9999999999564805
ENSG00000023171	GRAMD1B	954.229342025013	0.300617642648423	0.301052195636001	0.9798061639092392	1	1	1	0.9801208483545972	1	1	1
ENSG00000023191	RNH1	208.911540583313	0.0860103536471904	0.0219080165142538	0.018715947856233872	0.9962953515716385	0.9999999999999848	1	5.2936283088111935e-6	0.020832652413654285	0.6371254355632245	0.9971836310237178
ENSG00000023228	NDUFS1	19.7650471139362	0.00882460735754611	0.00823166331455946	6.934585394802184e-8	8.2146254207216e-5	0.011760597301085585	0.22548683031878258	5.241780609566149e-8	5.419937539141717e-5	0.007774382032797789	0.16829470902681298
ENSG00000023330	ALAS1	60.5969927987339	0.0265706711839384	0.0171844309586298	1.5527766298317758e-5	0.059961083159818074	0.8603146936459704	0.9999146808409989	1.4713954029632603e-6	0.004943807364497177	0.3187907091379878	0.9513683629463879
ENSG00000023516	AKAP11	16.924892236397	0.00756614238374186	0.00775591893723786	3.7699487198672443e-8	3.295521608304153e-5	0.004669151681650607	0.11462713650945089	4.148846766138803e-8	3.8113338618250836e-5	0.0054280873452173806	0.12872539513365155
ENSG00000023572	GLRX2	33.7233407391146	0.0149633897513148	0.0152544313152156	7.377398739683017e-7	0.0021147707015833905	0.1852716317108013	0.8613412961585429	8.107328921536094e-7	0.0023817928480709405	0.20096515909475976	0.8776877382074884
ENSG00000023608	SNAPC1	203.676880531952	0.0840363177814563	0.0848655472135849	0.016366220118944175	0.9948641233672919	0.9999999999999427	1	0.017323815007824317	0.9955183927657708	0.9999999999999671	1
ENSG00000023697	DERA	65.2970968654949	0.0285726949704072	0.0286272785976315	2.357356052362647e-5	0.08674108090811261	0.9156762918170676	0.99998404403837	2.383558491481086e-5	0.08756465365720623	0.9168913414206524	0.9999847773840558
ENSG00000023839	ABCC2	116.803399360434	0.0499842645694551	0.0330004342291959	6.922839103647993e-4	0.655832968559858	0.9999764143195808	0.9999999999999979	5.4925532008032185e-5	0.16994694725234671	0.9770125752434555	0.9999997163695462
ENSG00000023892	DEF6	660.178621671213	0.229214471874715	0.0363888793457042	0.8198666266471902	1	1	1	9.866927764445865e-5	0.25435762518928673	0.9927221325354407	0.999999990057662
ENSG00000023902	PLEKHO1	39.8024323377059	0.0176132354617086	0.0100759590225966	1.6689501735056567e-6	0.005741679683974099	0.3474224160353675	0.961180345721667	1.2063714538435022e-7	1.8358785004479738e-4	0.025303243427976407	0.36776043708403516
ENSG00000024048	UBR2	47.2360632477644	0.0208342060244489	0.0205999252893181	4.033167522732306e-6	0.01559065247266267	0.5683340304572276	0.9942447295988255	3.795632311121011e-6	0.014596531005859337	0.5527337441724869	0.9933067909199881
ENSG00000024862	CCDC28A	143.617713463615	0.0607618197500979	0.0593460739063974	0.0023208324177195205	0.8742284026807776	0.9999999093246027	1	0.002006385608525618	0.8537181953590962	0.9999998034090605	1
ENSG00000025039	RRAGD	215.689615371549	0.0885538181919155	0.0776703407513424	0.022114240355577408	0.9975954797027744	0.9999999999999973	1	0.010307244094443724	0.9860586578854548	0.9999999999962934	1
ENSG00000025156	HSF2	407.022003398336	0.154936655601593	0.153405658820932	0.320822314000078	0.9999999991341624	1	1	0.30963137611413616	0.9999999987021181	1	1
ENSG00000025434	NR1H3	488.229612945784	0.180276299547116	0.0280444325878274	0.5141719632714872	0.9999999999992402	1	1	2.116328849066651e-5	0.07903015460032847	0.9031567278522996	0.9999749322285469
ENSG00000025708	TYMP	1351.28561645509	0.378375117976813	0.0389500466796146	0.999179779757589	1	1	1	1.4904130468207377e-4	0.32718376631464496	0.9971862916064903	0.9999999993116488
ENSG00000025770	NCAPH2	22.2570196542762	0.00992616790099645	0.00225853456314935	1.1317290060652851e-7	1.675375619583086e-4	0.023247156702581484	0.34966996008632667	9.48803591249714e-10	7.633678766882923e-8	3.5340562540842058e-6	9.46123548541955e-5
ENSG00000025772	TOMM34	2031.35041879565	0.477812981450516	0.428523032595404	0.9999948495012427	1	1	1	0.9999282283175377	1	1	1
ENSG00000025796	SEC63	31.5559979457111	0.0140151957022177	0.0137093268770801	5.376534690793022e-7	0.0014103328791744696	0.13875430087172436	0.7967142777015949	4.839869552908382e-7	0.0012300199381970467	0.12533765834414812	0.7720048143968647
ENSG00000025800	KPNA6	25.8410803238158	0.0115061927356364	2.40716914585734e-4	2.1567606489636404e-7	4.1529354222780146e-4	0.05231746099456569	0.5430283133854203	3.7286951304338345e-11	1.8189394435097483e-10	8.617725422155331e-10	3.851397201160012e-9
ENSG00000026025	VIM	47.4350899323505	0.0209201534116532	0.0107377798428814	4.123469470873609e-6	0.015968196754925224	0.5740106931180929	0.9945572875267121	1.5883700332786077e-7	2.7118582926055623e-4	0.03605106960527493	0.44910923811403114
ENSG00000026036	RTEL1-TNFRSF6B	15.5491300549993	0.00695539625855448	0.00169651684585602	2.741095861402698e-8	2.0212150779741478e-5	0.0027883513528322856	0.07591761375005668	5.06938269140278e-10	2.5016879678929627e-8	8.144528973463849e-7	1.7543993248270162e-5
ENSG00000026103	FAS	409.71075816912	0.155800692869497	0.0192240201371961	0.32718750497325666	0.9999999993117415	1	1	2.6295351335248185e-6	0.009711660810273859	0.45846555841430814	0.9843513523759669
ENSG00000026297	RNASET2	4697.06257548871	0.67905451544319	0.515888364417753	0.9999999999848157	1	1	1	0.9999994180708363	1	1	1
ENSG00000026508	CD44	141.899510823372	0.0600785554902399	0.0580628646291527	0.0021643493548085813	0.864623351737636	0.9999998680678579	1	0.001752675996659514	0.8330525157729028	0.9999996077967686	1
ENSG00000026652	AGPAT4	11.6475836300021	0.00521927553232043	0.00548615094911837	9.964527314387794e-9	4.078021205722315e-6	4.7113897605499666e-4	0.01577821089896969	1.1782206099653081e-8	5.341969043337613e-6	6.416268826044957e-4	0.021032267030403173
ENSG00000026751	SLAMF7	56.6201693854793	0.024870274869242998	0.0161452196289328	1.0678716870327065e-5	0.04221191939891422	0.7947140899977252	0.999672568352607	1.074053254224161e-6	0.003377088799346173	0.252673790647047	0.918544842952363
ENSG00000026950	BTN3A1	359.051836426592	0.139218542006537	0.0375973943402498	0.21291590207846323	0.9999999510721121	1	1	1.2023429098606542e-4	0.28794759469845754	0.9953132673813864	0.9999999971397558
ENSG00000027075	PRKCH	15.9892817729875	0.00715087585764681	0.00707927652694148	3.040979723589743e-8	2.3721147046962265e-5	0.0033061749450863376	0.08720530751488509	2.9281109314993614e-8	2.2379399249206067e-5	0.003108075763883722	0.08295166145546173
ENSG00000027847	B4GALT7	1326.86555817841	0.374095250133997	0.249725718746094	0.9990027605346943	1	1	1	0.8954860701468688	1	1	1
ENSG00000028116	VRK2	69.0467221392333	0.0301639636585074	0.0286760086862671	3.2319009291348344e-5	0.11283225371769523	0.9456379505211256	0.9999960633999467	2.407162780448946e-5	0.08830416904657468	0.9179640068329379	0.9999854044146436
ENSG00000028137	TNFRSF1B	71.8372988187128	0.0313448510746117	0.0309203993456038	4.049651327431292e-5	0.1349837931973259	0.961556825285532	0.9999986559894387	3.737313853136026e-5	0.12674989203252285	0.95637173149319	0.9999980155023236
ENSG00000028203	VEZT	137.492886503076	0.0583216548776199	0.0582348598203935	0.0018015741462718005	0.8373828712591561	0.9999996585069458	1	0.0017850497488032246	0.8359397624233403	0.9999996422587278	1
ENSG00000028310	BRD9	80.7612157686584	0.0351019546118683	0.0200622171002881	7.943717125225014e-5	0.22044573573341553	0.9885664774455505	0.999999963591515	3.2956298907649284e-6	0.012500940479302947	0.5163276614244752	0.9906000698794483
ENSG00000028528	SNX1	541.426692179281	0.196067740531614	0.0540284842194865	0.6295216459475135	0.999999999999993	1	1	0.001121729538536953	0.7546268748022147	0.9999967908123324	1
ENSG00000029364	SLC39A9	641.761865221254	0.224254111783559	0.203404789768337	0.7967675764706225	1	1	1	0.678594110622244	0.9999999999999992	1	1
ENSG00000029534	ANK1	136.173875455757	0.0577944933836503	0.0560672396893104	0.0017031362418509222	0.8284740120486224	0.9999995474450699	1	0.0014113398744323158	0.7968396273335485	0.9999988756247924	1
ENSG00000029639	TFB1M	125.873476198875	0.0536574020193252	0.0547100327598209	0.0010747844614907853	0.7463786972367944	0.9999961276132977	1	0.0012124227856254999	0.7693250860619941	0.9999977328243437	1
ENSG00000029725	RABEP1	529.632180298772	0.192619283442203	0.0910462648875495	0.6053274556574434	0.9999999999999801	1	1	0.02587891573908363	0.9984446039451157	0.9999999999999996	1
ENSG00000030066	NUP160	34.2189381320602	0.0151799532659483	4.44703745441932e-4	7.914872109937576e-7	0.0023109499725443294	0.19688924317840228	0.8736534261682176	6.557543397178733e-11	5.593112639701303e-10	4.315119372932941e-9	2.984388824955886e-8
ENSG00000030110	BAK1	3462.18698132082	0.609305359486083	0.483002021773883	0.999999998276054	1	1	1	0.9999961461250348	1	1	1
ENSG00000030582	GRN	85.4530062295629	0.037065603158537803	0.00928599835823627	1.102939697441574e-4	0.2729771422645947	0.9943011683415662	0.9999999950355366	8.552036045994527e-8	1.1171341886462294e-4	0.01585035148446956	0.27516591626430653
ENSG00000031081	ARHGAP31	137.381028940953	0.0582769723071333	0.0507370067077779	0.0017930515189023	0.836641113662362	0.9999996502345332	1	7.595254521778338e-4	0.6756424437660056	0.9999835823791371	0.9999999999999991
ENSG00000031698	SARS	11.2226639189577	0.00502982696457827	0.0033999328448103	8.819445396213155e-9	3.345864339587834e-6	3.748899504920633e-4	0.01271155965579207	2.696264100876533e-9	4.6591045399502207e-7	3.51509197510369e-5	0.0011702922199836596
ENSG00000032389	TSSC1	66.25905417127	0.0289814288763037	0.0292157702019686	2.5597466738802588e-5	0.09303091864674251	0.924432363614239	0.9999888008764363	2.6824058085628266e-5	0.09676522918781394	0.9291058974665242	0.9999908738232234
ENSG00000032444	PNPLA6	64.1562755357631	0.0280875158249471	0.016359267685305202	2.1351557644821995e-5	0.0796414706799099	0.9042306187087678	0.9999758330443029	1.1472973692194799e-6	0.0036610229085272117	0.26583990592711093	0.9264911228957877
ENSG00000032742	IFT88	1114.22143468603	0.334177395386743	0.31959837016483	0.9944353248764347	1	1	1	0.9900762526245293	1	1	1
ENSG00000033011	ALG1	24.0766917162021	0.0107289968320062	0.00416827737641603	1.582697423119228e-7	2.6982454543600376e-4	0.03588961562018844	0.4480238016294348	4.8760299131700435e-9	1.2624489578172415e-6	1.1863607790973951e-4	0.0041123118220959265
ENSG00000033030	ZCCHC8	18.8052245676577	0.00839966977086595	0.00662388338922519	5.681477610597341e-8	6.112889144538336e-5	0.008773836087963782	0.1836563877393994	2.2889890316513117e-8	1.527909419574147e-5	0.002063222534506415	0.05908295797216634
ENSG00000033050	ABCF2	354.581339235297	0.137723883037471	0.0942484412913827	0.20362574863170813	0.9999999292302848	1	1	0.03139638028244551	0.999126183590831	1	1
ENSG00000033100	CHPF2	157.455056237083	0.0662284049593327	0.0502113642354168	0.003940500748534914	0.9332561583974883	0.9999999959119582	1	7.120200754789918e-4	0.6618728207075193	0.9999788469543283	0.9999999999999983
ENSG00000033170	FUT8	356.280318296244	0.138292528094094	0.137385841475023	0.20713710562373444	0.9999999384824035	1	1	0.2015519762189456	0.9999999230974287	1	1
ENSG00000033178	UBA6	50.2462168563187	0.0221324966795435	0.0225170799617855	5.596274069263885e-6	0.022080370981521935	0.6508424352417317	0.9975855812072542	6.149564081403547e-6	0.024348518612632986	0.6737330114145359	0.9981520978033599
ENSG00000033800	PIAS1	256.719181502192	0.103652922551553	0.0502015876882732	0.05257749838960757	0.9998552052705965	1	1	7.111607901194583e-4	0.6616139203544076	0.9999787474256396	0.9999999999999983
ENSG00000034053	APBA2	38.1852508545427	0.0169097069605307	0.0164148171556127	1.3557119188378763e-6	0.004481635693503683	0.3008118865242403	0.94402791630247	1.1669935728875203e-6	0.003737809282986393	0.26929873473474253	0.9284455121210651
ENSG00000035115	SH3YL1	4129.10689791549	0.650344523144057	0.622437891490998	0.9999999998895052	1	1	1	0.9999999992758277	1	1	1
ENSG00000035141	FAM136A	143.38181060707	0.0606680689356071	0.0228463674773493	0.00229882448041141	0.8729423894727314	0.9999999045208338	1	6.660221138155009e-6	0.026426228663529505	0.6926859686754582	0.9985354582010086
ENSG00000035403	VCL	362.708153341069	0.140437142644963	0.0798202625369212	0.22063291081529457	0.999999963856623	1	1	0.012113014225058727	0.9899536329041296	0.9999999999990747	1
ENSG00000035664	DAPK2	204.33713020984	0.0842857734857006	0.0758699511602531	0.016649889236569626	0.9950696843179855	0.9999999999999515	1	0.00896463914568657	0.9817996500603222	0.9999999999883465	1
ENSG00000035681	NSMAF	273.183657235473	0.109572215605804	0.0916363313135088	0.07016381564826435	0.9999566426272175	1	1	0.02683653580857559	0.9985994112598661	0.9999999999999997	1
ENSG00000035687	ADSS	615.821229781881	0.217157987010785	0.21755857101758	0.7603250600934618	1	1	1	0.7624885837597264	1	1	1
ENSG00000035720	STAP1	22.2934546058634	0.00994225557768576	0.00855731956844894	1.1395527754753942e-7	1.6920177333901165e-4	0.02346172438665084	0.35160373406959056	6.12194726024029e-8	6.831043759403244e-5	0.009801986830425657	0.19869344524433186
ENSG00000035862	TIMP2	250.742163159117	0.101484552657051	0.0986531785516981	0.04698844714886663	0.9997779229330331	1	1	0.04034368050538162	0.9996163435733773	1	1
ENSG00000035928	RFC1	17.3306170100513	0.00774611355080446	0.00160054403696508	4.128516439827479e-8	3.78307578587922e-5	0.005386578932223163	0.12797303123146364	4.505025241741123e-10	2.0227673536155066e-8	6.133640374494931e-7	1.2593653579973108e-5
ENSG00000036054	TBC1D23	11.1182688281192	0.00498327183433398	0.00657043363291425	8.555238961704958e-9	3.1844030532468537e-6	3.53979236942803e-4	0.012034623418229584	2.222284567476862e-8	1.4590224359123383e-5	0.001962455945012098	0.05663299949047795
ENSG00000036448	MYOM2	4404.68082855091	0.664889515819043	0.664795036254281	0.9999999999593197	1	1	1	0.9999999999590531	1	1	1
ENSG00000036549	ZZZ3	22.6696049218325	0.0101083123756085	1.40225127752167e-4	1.2230307988581046e-7	1.872217523425368e-4	0.0257647158274682	0.3716909012300117	2.621125538837532e-11	8.56215098821167e-11	2.8710023247668914e-10	9.342563389580505e-10
ENSG00000037042	TUBG2	87.894452112391	0.0380842598897632	0.00343189525192517	1.299978574574867e-4	0.3018911391495013	0.9960913236680774	0.9999999982808884	2.7675849390007556e-9	4.870554360936197e-7	3.7136829042716535e-5	0.00124021122643736
ENSG00000037280	FLT4	903.510997723379	0.289261346728703	0.0800808134916483	0.9698487620078761	1	1	1	0.012347694535910336	0.9903512652632712	0.9999999999992191	1
ENSG00000037474	NSUN2	1864.85783023315	0.45652943327203	0.421604095863799	0.9999834906246148	1	1	1	0.999898001869376	1	1	1
ENSG00000037637	FBXO42	132.909555456947	0.0564873201983896	0.0122089532105745	0.0014781545201424384	0.804880849228038	0.9999990972599547	1	2.820279426662964e-7	5.993875048747599e-4	0.07117655573641968	0.6244944439668008
ENSG00000037757	MRI1	519.810554853392	0.189724999026879	0.153531493690667	0.5845333633976864	0.9999999999999527	1	1	0.3105467608941014	0.9999999987444719	1	1
ENSG00000038002	AGA	4205.8143921631	0.654518499210388	0.654518499210388	0.9999999999169408	1	1	1	0.9999999999169408	1	1	1
ENSG00000038210	PI4K2B	155.318620264411	0.0653885415368494	0.067512464180974	0.003644424954793002	0.9260584668967274	0.9999999933453619	1	0.0044308197436965235	0.943126699349179	0.9999999980736773	1
ENSG00000038219	BOD1L1	75.5081534145772	0.0328938728892156	0.0322644917882736	5.387940743628583e-5	0.1675633817409592	0.9762158222573081	0.9999996859728998	4.8043322381730036e-5	0.15385415081122977	0.9709924576621354	0.999999429714442
ENSG00000038274	MAT2B	18.2947743236717	0.00817353216097271	0.00454596854675162	5.0964822362331574e-8	5.196459423473243e-5	0.007450542470916255	0.1631438709936056	6.374116900964566e-9	1.9670218757150693e-6	2.012554843179304e-4	0.006961119315958553
ENSG00000038382	TRIO	49.1357251292691	0.021653938363017	0.0213988983058594	4.968225806090132e-6	0.019485934431244134	0.621302097698474	0.9966537075820799	4.659107536997276e-6	0.018202028467821596	0.6051198109531375	0.9960295915240708
ENSG00000038427	VCAN	17.9292258588773	0.00801152496321522	0.00806627433035905	4.709310752470941e-8	4.6149620112512224e-5	0.006604568910779984	0.14924669398041357	4.8372822636366664e-8	4.80486645612066e-5	0.006881363575401034	0.15386703395068946
ENSG00000038532	CLEC16A	13.4324467516106	0.00601426148847584	0.00399885058840305	1.6188339446721045e-8	8.865772353705559e-6	0.0011346527178384136	0.035215679360610985	4.3039298791569536e-9	1.0252153120893226e-6	9.231706513257443e-5	0.0031892843745738864
ENSG00000038945	MSR1	1475.32716993125	0.399241285571664	0.39884829959532	0.9996926640690024	1	1	1	0.9996867937584859	1	1	1
ENSG00000039123	SKIV2L2	13.0359160540413	0.00583775476261791	0.00631804912811447	1.4585803453925905e-8	7.513836037142951e-6	9.43214132121506e-4	0.029864067080491274	1.9287413333124448e-8	1.16871422294329e-5	0.0015400246373651338	0.04601579664515387
ENSG00000039523	FAM65A	98.8666402272807	0.0426357594318535	0.00101874089635536	2.5917304214517767e-4	0.43936511469875983	0.9993592958516928	0.9999999999877961	1.9911627902047258e-10	4.55383131203746e-9	8.113224569950006e-8	1.1265485355682614e-6
ENSG00000039650	PNKP	759.862760439494	0.254999247122181	0.111200081777847	0.9101745337489711	1	1	1	0.07562080800908899	0.9999691739342017	1	1
ENSG00000040199	PHLPP2	417.805477943078	0.158391314839818	0.0496880712580026	0.3464645459310337	0.9999999996557641	1	1	6.672372895522027e-4	0.647875506417105	0.9999728321782322	0.9999999999999969
ENSG00000040275	SPDL1	418.03632931996	0.158464963000613	0.155397844646809	0.34701645185263874	0.9999999996625121	1	1	0.32421553921681123	0.9999999992339261	1	1
ENSG00000040487	PQLC2	403.378722469018	0.153763053353339	0.0981070842461506	0.3122333519077629	0.9999999988188836	1	1	0.039144525131109	0.9995743438482758	1	1
ENSG00000040531	CTNS	267.47467228645303	0.107528601302539	0.104654756998713	0.06369712070049272	0.9999338458074452	1	1	0.05531096408285441	0.9998814749468949	1	1
ENSG00000040633	PHF23	175.413648206735	0.0732289591562001	0.0424370690445029	0.007250199674716962	0.9734437063935956	0.9999999999391908	1	2.518395557306041e-4	0.43322648840548683	0.9993038733355575	0.9999999999847502
ENSG00000040933	INPP4A	17.4166010673751	0.00778424592857063	0.00393524342615256	4.2080523843246453e-8	3.893992602932439e-5	0.005549454753480898	0.1309134920277315	4.103661854770735e-9	9.46647944144452e-7	8.38219338954449e-5	0.0028899900867641604
ENSG00000041353	RAB27B	37.3346116639249	0.016539245653264	0.0153796035921037	1.212171478082169e-6	0.003914583586675735	0.277106427012327	0.9326676206025867	8.439851632013884e-7	0.00250488703045626	0.20790599386580022	0.8842426302261766
ENSG00000041357	PSMA4	168.983352033041	0.070734420099342707	0.0505169977589998	0.005882004362296578	0.9626151740402126	0.9999999997195316	1	7.393273756785002e-4	0.6699153344883879	0.999981740644095	0.9999999999999989
ENSG00000041802	LSG1	2318.44381224737	0.510845547099395	0.464374262760147	0.9999992179022947	1	1	1	0.999989202928991	1	1	1
ENSG00000041988	THAP3	39.3983533997095	0.0174375418749982	0.0053448998201557	1.5854064110421007e-6	0.005403079103839414	0.3356154474103823	0.9573885248522428	1.0789009130540705e-8	4.636407888947147e-6	5.458715119817104e-4	0.018107583252671478
ENSG00000042088	TDP1	55.7245435728095	0.0244865063876861	0.0262517297544343	9.786862540273056e-6	0.03879584014010151	0.7773600552027634	0.9995611434775765	1.4495726714858215e-5	0.05629490490002309	0.8493850772351039	0.9998895712797441
ENSG00000042286	AIFM2	520.503765938605	0.189929958282811	0.0261203225299904	0.5860194900485478	0.9999999999999555	1	1	1.4088065519390902e-5	0.05483072750567897	0.8447012775630188	0.9998772802640392
ENSG00000042317	SPATA7	57.4969126106065	0.025245659957756	0.0260199534018529	1.161811677685698e-5	0.045757383790343775	0.8107712471214545	0.9997550824012805	1.3783395218402994e-5	0.05373042318004073	0.8410519236374492	0.9998670183923628
ENSG00000042429	MED17	118.568367980384	0.0507012621926384	0.0215554373000175	7.562126725685347e-4	0.6747155571406451	0.9999832959106677	0.9999999999999991	4.846803141167477e-6	0.018982119697200428	0.6150865840493549	0.9964243526885908
ENSG00000042445	RETSAT	1636.07570096904	0.424285161351446	0.142754995796139	0.9999109388659191	1	1	1	0.23565096848956746	0.9999999797793863	1	1
ENSG00000042493	CAPG	2060.37725853219	0.481354127004853	0.371543661286901	0.9999957732619537	1	1	1	0.9988806414679445	1	1	1
ENSG00000042832	TG	830.182057503577	0.272174592156325	0.0950915298060845	0.9468342746626883	1	1	1	0.03298352904587165	0.9992515798437077	1	1
ENSG00000042980	ADAM28	329.324250822512	0.129180997951225	0.128242333618423	0.15450929569257232	0.999999445999978	1	1	0.14954984264473625	0.9999993092883142	1	1
ENSG00000043093	DCUN1D1	28.5596985147673	0.0127013298929229	0.00941779190822574	3.3828819123726817e-7	7.658906166433388e-4	0.086820786929937	0.6774099579559569	9.06874132455826e-8	1.2167205627111599e-4	0.017199740884064285	0.2900463355679601
ENSG00000043462	LCP2	101.094579750918	0.0435547007144219	0.0390941310590438	2.955025965105662e-4	0.467743182704943	0.9995654516297772	0.9999999999956788	1.524312796198357e-4	0.3314481751479428	0.9973379880691409	0.9999999994096223
ENSG00000043514	TRIT1	862.675230198413	0.279846291217284	0.243731447176126	0.9585613415876041	1	1	1	0.8765487975971078	1	1	1
ENSG00000044090	CUL7	713.39139965771	0.243196799356865	0.151821382293595	0.8747383559893578	1	1	1	0.29817816561141064	0.9999999980320264	1	1
ENSG00000044115	CTNNA1	1843.44265527133	0.453665232085879	0.41027762454133	0.9999807486387711	1	1	1	0.9998205311254481	1	1	1
ENSG00000044459	CNTLN	37.4987439463283	0.0166107485317032	0.0166107485317032	1.2388080334879703e-6	0.004019211609563089	0.28162958660760273	0.9349987250115741	1.2388080334879703e-6	0.004019211609563089	0.28162958660760273	0.9349987250115741
ENSG00000047056	WDR37	92.6593011129446	0.0400661269337655	0.0316263213030443	1.770697654392972e-4	0.36056126876558225	0.9981779901294845	0.999999999792303	4.268945689211989e-5	0.14061063316580957	0.9646935163768003	0.9999989642386317
ENSG00000047188	YTHDC2	206.993562371754	0.0852880557991559	0.0802763559916125	0.017828006535304364	0.9958212237170984	0.9999999999999752	1	0.012526146788547132	0.9906402036902298	0.9999999999993125	1
ENSG00000047315	POLR2B	17.296463477482	0.00773096626210982	0.00333319843419438	4.097274763914527e-8	3.7397775567993286e-5	0.005322961302591467	0.12681589278852823	2.552051792115151e-9	4.2428584001719116e-7	3.129740722540575e-5	0.0010348832434123878
ENSG00000047365	ARAP2	111.18563262945	0.0476948858440066	0.0463706996191067	5.177442404270538e-4	0.592158146991504	0.9999308632978047	0.9999999999999655	4.3496820794020064e-4	0.5533546612854722	0.9998736089071661	0.9999999999998339
ENSG00000047578	KIAA0556	29.986779779199	0.01332753598763	0.014263269710047	4.2349912054984173e-7	0.0010323540808592213	0.10971625275547792	0.7385047289551201	5.848546087428019e-7	0.0015722834284180864	0.15021608198982983	0.8153567593006348
ENSG00000047579	DTNBP1	802.879222669832	0.265600827399489	0.247628195580324	0.9346543323943135	1	1	1	0.8891390145722194	1	1	1
ENSG00000047621	C12orf4	10.6055078654327	0.00475454213128954	0.00338867174778977	7.349317487914675e-9	2.484991781237511e-6	2.6502402329142694e-4	0.009108483858951022	2.6714865875021587e-9	4.586505844006439e-7	3.447337978235154e-5	0.0011464570049887213
ENSG00000047849	MAP4	184.794827484687	0.0768443217577834	0.035592027825666	0.009672838854939414	0.9842307779218653	0.9999999999937188	1	8.634216270042572e-5	0.23311408977403592	0.9903531365150731	0.9999999777114231
ENSG00000048028	USP28	29.1016481056007	0.0129392320396514	0.0115900713627058	3.687437148958139e-7	8.593319186579462e-4	0.09512037229256054	0.7014873756493591	2.2281681977265322e-7	4.34364582997282e-4	0.054361139505129	0.5530448217333811
ENSG00000048140	TSPAN17	129.471312840766	0.0551065731822967	0.0511446813451643	0.0012679527855632422	0.777606364413332	0.9999981505128136	1	7.981804013543758e-4	0.6861139213040726	0.999986530891313	0.9999999999999994
ENSG00000048162	NOP16	152.988703385071	0.0644708940952112	0.0440680545231982	0.003341959221924262	0.9174750244408643	0.999999988718348	1	3.176199776744326e-4	0.4835505589717678	0.9996513058585781	0.9999999999975937
ENSG00000048342	CC2D2A	337.220764537253	0.131870024369318	0.0493274837693339	0.16920850240416963	0.9999997072979082	1	1	6.377802071692029e-4	0.6380689429702648	0.9999677579078671	0.9999999999999952
ENSG00000048392	RRM2B	31.6627897709847	0.0140619589730863	0.0218248830212166	5.462920594778709e-7	0.001439748828352183	0.14087545413946267	0.8003241127209618	5.185190663836714e-6	0.020384447831550245	0.6319820582393585	0.9970195314920032
ENSG00000048405	ZNF800	39.4723558014565	0.0174697228315747	0.015616399538775	1.6004332282770761e-6	0.005463861414471638	0.33777067398092153	0.9581060007983773	9.101078112250249e-7	0.002752095470755056	0.22133857451083205	0.8958894513791857
ENSG00000048471	SNX29	167.174546273954	0.0700302985950021	0.0698502289784552	0.005536059934668769	0.9589365749172354	0.9999999995706734	1	0.005450279748871578	0.9579471500602101	0.9999999995214855	1
ENSG00000048544	MRPS10	280.247631993604	0.112087950172418	0.0818480231031873	0.07871290795146624	0.999974450152368	1	1	0.014034748134024944	0.9926908685147416	0.9999999999997549	1
ENSG00000048649	RSF1	24.7513556654393	0.0110263239636632	0.00583324071578309	1.7846137656540861e-7	3.192777793478152e-4	0.04165457024451169	0.4846951389636528	1.4546609916621378e-8	7.481740201153997e-6	9.38698321851339e-4	0.029735620194205836
ENSG00000048707	VPS13D	10.1020325376736	0.0045298521728077	0.00426032642510573	6.303382704686555e-9	1.93120107283562e-6	1.969273510192826e-4	0.0068137741198772694	5.211649001246599e-9	1.4101091209139938e-6	1.3545589813845904e-4	0.004698438423113904
ENSG00000048828	FAM120A	34.5570840255067	0.0153276598185773	0.0143396364617247	8.300465815791469e-7	0.002453184334227365	0.2050120325085758	0.8815565153503626	6.000824398499915e-7	0.0016251441528621902	0.153847560907737	0.8208447977181388
ENSG00000048991	R3HDM1	11.7762937360658	0.005276646126728	0.0109622156980438	1.0334381794763203e-8	4.325365086765842e-6	5.041160232390762e-4	0.01681139322962799	1.7393175855140441e-7	3.0801010761816183e-4	0.040358694851272525	0.4768074626468941
ENSG00000049089	COL9A2	47.2728436308549	0.0208500903469347	0.0089946169761651509	4.0497268193329106e-6	0.01565990274345641	0.5693851100338805	0.9943037136393437	7.49744462069657e-8	9.214423558356888e-5	0.013157883118227964	0.24331992411544823
ENSG00000049167	ERCC8	86.7132113477099	0.0375916741279889	0.0112112339236626	1.2012342032385881e-4	0.28778507974536616	0.9953033276058373	0.9999999971226659	1.9209378343543193e-7	3.537596209920446e-4	0.045559591248139464	0.5073451441599233
ENSG00000049239	H6PD	1697.44135808957	0.43330357826144	0.414444653038763	0.9999438562408658	1	1	1	0.9998539970964282	1	1	1
ENSG00000049245	VAMP3	153.269958362001	0.0645817631584506	0.0482494039352531	0.003377372578723059	0.918553401770797	0.9999999894127096	1	5.5616474129494e-4	0.6080138502140229	0.9999465196981502	0.9999999999999822
ENSG00000049246	PER3	290.866836486723	0.115843194971547	0.0699456795845231	0.092706649636216	0.9999885979277743	1	1	0.005495615092441564	0.9584741474279259	0.999999999548213	1
ENSG00000049249	TNFRSF9	99.9772303350488	0.0430940567121903	0.0380734588947833	2.767847468242435e-4	0.45352483246609676	0.9994715944258314	0.9999999999927169	1.2977411518544368e-4	0.3015794890608805	0.9960754483425986	0.9999999982612857
ENSG00000049449	RCN1	492.153891821716	0.18146237693435	0.174453006040026	0.5231715163558445	0.9999999999994614	1	1	0.469548531274922	0.9999999999959571	1	1
ENSG00000049541	RFC2	173.614343233389	0.0725322956574798	3.03334975572445e-4	0.006844797254285551	0.9707390561790002	0.9999999999065119	1	4.5102810375396984e-11	2.676968646753153e-10	1.5046948131924864e-9	7.851996719487886e-9
ENSG00000049759	NEDD4L	198.796592151695	0.0821882223568255	0.0823721551135602	0.014379152355504576	0.9930765535714652	0.9999999999998042	1	0.01456807288973161	0.993277205445127	0.9999999999998266	1
ENSG00000049860	HEXB	377.757440650224	0.145416748592074	0.116980455877196	0.25341693064993276	0.9999999896995629	1	1	0.09723942742513692	0.9999911055448285	1	1
ENSG00000050130	JKAMP	211.044190045294	0.0868121570597043	0.0254327785210678	0.019740859383701626	0.9967628508231436	0.9999999999999912	1	1.2112441707734511e-5	0.04760173634435916	0.8184375709522287	0.9997883825950215
ENSG00000050327	ARHGEF5	94.9667918926304	0.0410229607721453	0.040277761542655	2.045686022574822e-4	0.3896874328406805	0.9987565248115209	0.9999999999268301	1.8286301840664265e-4	0.36696943697358797	0.9983243749232238	0.9999999998348948
ENSG00000050344	NFE2L3	1697.8623349679	0.433364470163755	0.137753337862736	0.9999440323822911	1	1	1	0.20380692694401736	0.9999999297413655	1	1
ENSG00000050393	MCUR1	15.2558066377448	0.00682508310343792	0.00616799485982353	2.5552412519225243e-8	1.8130155942874815e-5	0.0024817181141568723	0.06895864493639003	1.7700389487451673e-8	1.0209509468062095e-5	0.0013268995752493407	0.040420849956062876
ENSG00000050405	LIMA1	318.202909588386	0.125365434097618	0.0290212467470003	0.13491480573014447	0.9999986516517992	1	1	2.5802404561736658e-5	0.09365883301922862	0.9252438879774675	0.9999891827242902
ENSG00000050426	LETMD1	69.8389634922393	0.0304995087452472	0.0212472070323505	3.448307965370212e-5	0.11888583117458762	0.9506481702959166	0.999997090418338	4.483245471642583e-6	0.01746978234194152	0.5953616398689554	0.9956087910956404
ENSG00000050438	SLC4A8	66.1138712000112	0.02891976293609	0.0278927096572299	2.528284917280299e-5	0.09206379231600337	0.9231612680189675	0.9999881835825052	2.0511627972785718e-5	0.07690202538488666	0.8992980315730971	0.9999714940861543
ENSG00000050555	LAMC3	904.687752000232	0.289529010193453	0.288185162489035	0.9701258513031474	1	1	1	0.9687118236586083	1	1	1
ENSG00000050748	MAPK9	362.121772245943	0.140241942164861	0.141044532090646	0.21938831216570265	0.9999999620555795	1	1	0.2245259586007624	0.9999999689407412	1	1
ENSG00000051009	FAM160A2	584.863259404978	0.208517565854191	0.19721304868115	0.7106273812861745	0.9999999999999999	1	1	0.6374056233376777	0.999999999999995	1	1
ENSG00000051108	HERPUD1	94.5526705708267	0.0408513799547744	0.0257457353995462	1.9938554259246732e-4	0.38443787832274867	0.9986675105789662	0.9999999999116822	1.2979823402758939e-5	0.05080319577720471	0.830761260909078	0.9998346125577473
ENSG00000051180	RAD51	14.0129519365121	0.00627254731194161	0.00174106980307367	1.8794177991665606e-8	1.1220742750839285e-5	0.0014725868632757821	0.04426415164360231	5.348210763145289e-10	2.754164973861606e-8	9.255695843091161e-7	2.0361286044434657e-5
ENSG00000051523	CYBA	75.4001162631179	0.0328483542929624	0.0237269837222133	5.343779673894211e-5	0.16655067960444647	0.9758680919091856	0.9999996720378748	8.209691602423241e-6	0.03263298366746692	0.7402309633664852	0.9992258190302341
ENSG00000051596	THOC3	86.8048826719237	0.0376299197751738	0.0411969383385736	1.208663746815608e-4	0.2888722575164451	0.9953694162916126	0.9999999972350483	2.0994098158433339e-4	0.39502002822367366	0.9988410368010572	0.9999999999395677
ENSG00000051620	HEBP2	852.291396658247	0.277412291550629	0.246847998450325	0.9551082709642201	1	1	1	0.8867023051252001	1	1	1
ENSG00000051825	MPHOSPH9	60.3198615891339	0.0264523686370462	1.53640600522736e-4	1.513779787964964e-5	0.058582530186392034	0.8563325832462378	0.9999060852598404	2.758993034035484e-11	9.594836036797005e-11	3.394432512848766e-10	1.1604710525858764e-9
ENSG00000052126	PLEKHA5	401.905373342053	0.15328752037674	0.15328752037674	0.30877272092014285	0.9999999986610757	1	1	0.30877272092014285	0.9999999986610757	1	1
ENSG00000052749	RRP12	1753.08962068184	0.441240895135153	0.0034418076151865	0.9999628365801795	1	1	1	2.7900048937823385e-9	4.937779579661239e-7	3.7772010429093505e-5	0.0012625906507772733
ENSG00000052795	FNIP2	178.504013546307	0.0744230622663748	0.0459456690600638	0.007989559994376894	0.9775697473165672	0.9999999999710677	1	4.1090218281658597e-4	0.5406574251646025	0.9998470641022984	0.9999999999997263
ENSG00000052841	TTC17	23.4678496680388	0.0104605241708774	0.0111667089401419	1.417421179317202e-7	2.3092700304594427e-4	0.031205083855355364	0.4148635567167407	1.887326658289723e-7	3.451804902384614e-4	0.04459633369070348	0.5019071915131237
ENSG00000053254	FOXN3	20.1713206435216	0.00900436518298391	0.00880931992276972	7.530855228310429e-8	9.27478249602709e-5	0.013241761650543693	0.24435995578301517	6.885772096953957e-8	8.12947241826123e-5	0.011640895601334522	0.22391238386270151
ENSG00000053371	AKR7A2	149.392840918925	0.0630511067387989	0.0515222945019275	0.0029146979886996993	0.9026117334691655	0.9999999747091043	1	8.354474782512611e-4	0.69564654668574	0.999988799528438	0.9999999999999997
ENSG00000053372	MRTO4	598.291534357082	0.212288731333668	0.179736432037983	0.7330229874236396	1	1	1	0.5100634885640802	0.9999999999991116	1	1
ENSG00000053501	USE1	29.1545011513743	0.0129624270526768	0.00722585517899374	3.71834803614135e-7	8.689333312097425e-4	0.09595564279201241	0.7037793514957917	3.16305421854679e-8	2.5200032716554688e-5	0.0035245869741746816	0.09180857632403783
ENSG00000053702	NRIP2	23.2846934479279	0.0103797317905911	1.65849115588417e-4	1.3706570189953027e-7	2.202017539083556e-4	0.02988813915073607	0.4049117348017516	2.887068362156242e-11	1.0596934441053918e-10	3.9265779516739485e-10	1.4008393334208336e-9
ENSG00000053900	ANAPC4	454.716686475762	0.170005551905724	0.161264934586037	0.43521347965529655	0.9999999999858105	1	1	0.3681366405925409	0.9999999998416534	1	1
ENSG00000053918	KCNQ1	90.6648039203989	0.0392375405409612	0.0379683844839883	1.5587061821809023e-4	0.33570679649206514	0.9974813604504521	0.9999999994934597	1.276146448189186e-4	0.2985530412952323	0.9959178552799446	0.999999998058729
ENSG00000054118	THRAP3	13.1182771799522	0.0058744211240429	0.00295685847428489	1.4907408973918734e-8	7.778977014316624e-6	9.80574492280506e-4	0.03092269096611666	1.8485625252750992e-9	2.441278311726691e-7	1.566511007899951e-5	4.923999801265122e-4
ENSG00000054148	PHPT1	58.2855294455483	0.0255830661663083	0.00796778788952676	1.2522513821333625e-5	0.04912076594858861	0.8244331714622632	0.9998119453663061	4.609136661226643e-8	4.4679303839778584e-5	0.00638992950309647	0.14561214762462615
ENSG00000054179	ENTPD2	1161.30103642831	0.343447987599175	0.0152864225425923	0.996202250191982	1	1	1	8.191223632714184e-7	0.0024127677512164603	0.2027283433812488	0.8793897485009042
ENSG00000054219	LY75	937.539405508602	0.296920888421213	0.285834499116456	0.9769445528544234	1	1	1	0.9660973109270631	1	1	1
ENSG00000054277	OPN3	188.580549138861	0.078295305177269	0.0721006519120835	0.010808692011275656	0.9873121053496928	0.9999999999975184	1	0.006602871291595203	0.9689445222476072	0.9999999998781132	1
ENSG00000054282	SDCCAG8	656.742676225053	0.228293855287346	0.0218767246442206	0.8157266606910207	1	1	1	5.25258424832753e-6	0.020663074815714944	0.6351933898114839	0.9971228785826297
ENSG00000054392	HHAT	67.0603785400185	0.0293216476352179	0.0263599714745405	2.7394649065537457e-5	0.09848313249776997	0.9311376209139053	0.9999916833697411	1.4839130074606466e-5	0.05752119944808187	0.8531636105796987	0.9998987988564426
ENSG00000054523	KIF1B	1291.28721675253	0.36775323037994	0.337954074051941	0.9986729071652596	1	1	1	0.9952311197951419	1	1	1
ENSG00000054611	TBC1D22A	72.7354331554012	0.0317243028146943	0.0323919817815701	4.347644344426804e-5	0.14260033016838358	0.9657319727777447	0.999999054404069	4.917940996196357e-5	0.15657971318318176	0.9721253847820636	0.9999994943111418
ENSG00000054654	SYNE2	71.3919395546281	0.0311565814308068	0.0276105273851159	3.9084446771586734e-5	0.13129413888547303	0.9593265917833911	0.9999984016253591	1.9345564301498364e-5	0.07304587807420071	0.891796976540309	0.9999638495169564
ENSG00000054793	ATP9A	1516.80540644549	0.405909658509165	0.404959294143946	0.9997776128761254	1	1	1	0.9997670530318747	1	1	1
ENSG00000054965	FAM168A	363.101779699973	0.140568127262158	0.0183469565178561	0.22146985797531205	0.9999999650178559	1	1	2.06020869930601e-6	0.007345283028756255	0.39758913555274455	0.9740287115633597
ENSG00000054967	RELT	331.19558788233	0.129819755668849	0.055446578644411	0.157935352573507	0.9999995235155675	1	1	0.0013172416382535301	0.7845478490087784	0.9999984481155276	1
ENSG00000054983	GALC	354.348870895438	0.137646017951011	0.139401883747767	0.2031471680662904	0.9999999278616027	1	1	0.2140688585281778	0.9999999532463103	1	1
ENSG00000055070	SZRD1	34.9256331930572	0.0154885964658627	0.00327514303658812	8.738878765068847e-7	0.002616295903252741	0.2140404274770522	0.8897241359230693	2.4316274549462946e-9	3.9070842250410465e-7	2.824681581181654e-5	9.280030411502604e-4
ENSG00000055118	KCNH2	281.165231500584	0.112413697407707	0.0786078537468848	0.0798679852763241	0.9999761576906786	1	1	0.011066570457474945	0.9878999010289384	0.999999999997971	1
ENSG00000055130	CUL1	13.9646807017444	0.00625107497105003	0.00614186914300088	1.8565084025645717e-8	1.1006289153070448e-5	0.0014416276708612008	0.043454322174731885	1.7435484944705593e-8	9.969477216209555e-6	0.0012924368402968955	0.03949932781138088
ENSG00000055211	GINM1	791.495365224648	0.262824699770244	0.00895101027755117	0.9288525473279091	1	1	1	7.349518538202204e-8	8.948525704954857e-5	0.0127877316308187	0.2386903234584924
ENSG00000055332	EIF2AK2	96.916616338808	0.0418299975300603	0.0219675818417409	2.3051758642456122e-4	0.41449061511023577	0.9991050071637543	0.9999999999699883	5.37252311738623e-6	0.021158372894175326	0.6407898455298422	0.9972959803339247
ENSG00000055483	USP36	156.424872576788	0.0658236136062549	0.0619992719979191	0.0037954445078687282	0.9298632393833618	0.9999999948272972	1	0.002627994126698563	0.8902767186083217	0.9999999543520662	1
ENSG00000055917	PUM2	24.3573586841746	0.0108527096141476	0.00996109962939689	1.6642095312935368e-7	2.895446960642367e-4	0.038212860347452526	0.4633052587998048	1.1487753748262719e-7	1.7116906230696394e-4	0.02371495168584148	0.3538717851642773
ENSG00000056050	C4orf27	181.035300800295	0.0753988501293396	0.068684957590719	0.008637320380862401	0.9805080589142524	0.9999999999843135	1	0.0049207670061174325	0.9510356348240125	0.9999999990384922	1
ENSG00000056558	TRAF1	57.6348727684953	0.0253047024602496	0.0261741431226158	1.1772177167967968e-5	0.04633375294765674	0.8132144290018408	0.999766096329149	1.425381892394828e-5	0.05542716548085935	0.8466324850809157	0.999882465319522
ENSG00000056736	IL17RB	865.494174815168	0.28050423231378	0.242988534184299	0.9594545226780697	1	1	1	0.8740276111850146	1	1	1
ENSG00000056972	TRAF3IP2	244.094328397661	0.0990604643598971	0.0940395478910819	0.04125512893284555	0.9996450642785755	1	1	0.031012001240755094	0.9990921722458194	0.9999999999999999	1
ENSG00000057019	DCBLD2	209.951021529943	0.0864013388211232	0.0126969584492436	0.01921051075675273	0.9965306499258678	0.9999999999999883	1	3.3774937557851104e-7	7.64257093313514e-4	0.08667283042017404	0.6769580226598964
ENSG00000057252	SOAT1	383.656234237693	0.147352876002857	0.144368215236567	0.26666489307035124	0.9999999937250562	1	1	0.24635465495787956	0.9999999865517332	1	1
ENSG00000057608	GDI2	1126.61284900454	0.336642719022506	0.287141501111966	0.994967572649216	1	1	1	0.9675736010635334	1	1	1
ENSG00000057657	PRDM1	20.8974143086563	0.00932546674168188	0.00910768199428424	8.704089360378475e-8	1.1461966380632571e-4	0.01624556225450413	0.2795931707175956	7.8927689828312e-8	9.935633644553299e-5	0.014156616503566921	0.25549421851705745
ENSG00000057704	TMCC3	274.043624387797	0.109879242571415	0.108852075209777	0.07117214585879872	0.9999593317861529	1	1	0.06783661293424625	0.999949645067097	1	1
ENSG00000057757	PITHD1	19.3331741286406	0.00863345140062218	0.00171472082140382	6.34475911809318e-8	7.203037291514391e-5	0.01033145709610983	0.20616289021579315	5.181987061675386e-10	2.6024055688189662e-8	8.583822859176138e-7	1.865154481783815e-5
ENSG00000058056	USP13	134.873548114591	0.0572742210394169	0.0435240169077911	0.0016104063827433457	0.8193415583994124	0.999999403505223	1	2.9422318999794417e-4	0.46679687580435536	0.9995597286795448	0.9999999999955255
ENSG00000058063	ATP11B	47.511257742298	0.020953041613387	0.0157127929095239	4.158482782901096e-6	0.01611451970724287	0.5761759442124623	0.994672687204616	9.382733752172356e-7	0.0028583097501927446	0.22691630477968494	0.9003563414782176
ENSG00000058453	CROCC	448.076039040906	0.167939756020588	0.0600341338353556	0.41926825910746723	0.9999999999747373	1	1	0.0021544855417306996	0.8639800847613807	0.9999998648251107	1
ENSG00000058668	ATP2B4	12.4315723000847	0.00556862412014554	0.00507017893378117	1.239609126457708e-8	5.795336644909277e-6	7.038162933939995e-4	0.022898374186530734	9.053817251469809e-9	3.4914800407515045e-6	3.938532963796426e-4	0.01332205263111741
ENSG00000058866	DGKG	21.448709263894	0.00956912784809511	0.00934442591786546	9.694452074437976e-8	1.3403594303607047e-4	0.018856355011182102	0.30745513420261894	8.777940230242365e-8	1.1603858726416671e-4	0.016438090439821917	0.2817288264749348
ENSG00000059122	FLYWCH1	6953.76233917684	0.758005503312483	0.673408689013483	0.9999999999999495	1	1	1	0.9999999999774779	1	1	1
ENSG00000059377	TBXAS1	243.090879901099	0.0986934269801931	0.0971397504867692	0.04043309788697125	0.9996192775260041	1	1	0.037084057367754664	0.9994889903310095	1	1
ENSG00000059573	ALDH18A1	49.4005946073073	0.0217681244663001	0.00576451734790397	5.112262579043403e-6	0.020082685834775016	0.6284513138548448	0.9969024182555395	1.3960579137162199e-8	7.007518421198178e-6	8.721559667901335e-4	0.027830335953029195
ENSG00000059588	TARBP1	250.776343069219	0.101496982425249	0.0989677319818433	0.04701922955980298	0.9997784618621143	1	1	0.04104631541198267	0.9996387111369051	1	1
ENSG00000059691	PET112	423.044859823679	0.160059659317285	0.152104692772404	0.3590139313814492	0.9999999997804663	1	1	0.3002163179759014	0.9999999981728449	1	1
ENSG00000059804	SLC2A3	72.0152439446915	0.031420054528411	0.0328073794987232	4.1072709014433606e-5	0.13647422299094936	0.9624176576315819	0.9999987461559188	5.3042934677449693e-5	0.16564187229518457	0.9755512323538694	0.9999996589778609
ENSG00000059915	PSD	18.5011414320919	0.00826496850488791	0.00838700348828001	5.3265872046459606e-8	5.551661133917918e-5	0.007964918996844816	0.17128424852310065	5.6472798770634824e-8	6.0581182824703816e-5	0.008695101324860732	0.18247404177328075
ENSG00000060069	CTDP1	89.7539031643566	0.0388586433565039	0.0347684833242635	1.4692438604224645e-4	0.32448619616230434	0.9970859166149337	0.9999999992413658	7.501451305147455e-5	0.2120085632152584	0.9871843027124211	0.999999949287554
ENSG00000060138	YBX3	50.4624175461755	0.0222256123493615	0.021822264571373	5.7261293590071816e-6	0.022614228538110015	0.6564568071668473	0.9977360129800087	5.181806607468253e-6	0.020370451073563278	0.6318195135857541	0.997014220818718
ENSG00000060140	STYK1	93.6897924302197	0.0404936706453682	0.0328387952821294	1.889392800863421e-4	0.37352849881968	0.9984622765941434	0.9999999998694562	5.334545401436408e-5	0.1663384261139702	0.9757944985623679	0.9999996690355611
ENSG00000060237	WNK1	27.6251371684503	0.0122908116267343	0.0113585531776584	2.9078370167301415e-7	6.247313956422307e-4	0.07363575483456608	0.633560109808839	2.035810433564933e-7	3.834474778343644e-4	0.048852279398491016	0.5252485696509461
ENSG00000060491	OGFR	64.2820611691898	0.0281410348844081	0.00917494784626822	2.1587440587444995e-5	0.08040519149976277	0.9055513239187195	0.9999769085246178	8.136217966026038e-8	1.0387247930931931e-4	0.014778156532855302	0.2628494135749263
ENSG00000060558	GNA15	137.108413650771	0.0581680557655864	0.0551640465762817	0.001772417141960636	0.8348226908915442	0.9999996292403105	1	0.0012761745397416036	0.7787900574212593	0.9999982044571887	1
ENSG00000060642	PIGV	683.796100982148	0.235483510963758	0.00133470795988078	0.8462997501816942	1	1	1	3.178676211135212e-10	1.074793742894542e-8	2.6191639190820126e-7	4.607994697924944e-6
ENSG00000060749	QSER1	69.9993438107174	0.0305674078029357	0.0297043627399864	3.4935848420514226e-5	0.12013413031128217	0.951612692065039	0.9999972638868488	2.9545328004920712e-5	0.10485250793370682	0.9380826048560407	0.9999940678793334
ENSG00000060762	MPC1	291.729816517379	0.116146973531522	0.0671060589536921	0.09390393939801356	0.9999893278952044	1	1	0.004270552083965762	0.940144908784555	0.9999999975533075	1
ENSG00000060971	ACAA1	75.5764833951795	0.0329226597074218	0.00734499559009966	5.416030729565868e-5	0.168205522594288	0.9764334360549926	0.9999996944849405	3.365452327930285e-8	2.771347137298097e-5	0.003895793755661847	0.09943781169827304
ENSG00000060982	BCAT1	2947.36834437921	0.570380926605552	0.571190404005926	0.9999999789493172	1	1	1	0.9999999799952615	1	1	1
ENSG00000061273	HDAC7	12.1952375595308	0.00546333822164404	8.87972938475469e-4	1.1616896111732444e-8	5.222108161451189e-6	6.252669595998572e-4	0.020537104895146485	1.6040224704028105e-10	3.0488429558772623e-9	4.6638091499850987e-8	5.739576136587488e-7
ENSG00000061676	NCKAP1	195.082672385511	0.0807768092645943	0.0464814629173939	0.012992053916070612	0.9913440868105594	0.9999999999995044	1	4.4143234952787047e-4	0.5566459367210377	0.9998797637575073	0.9999999999998542
ENSG00000061794	MRPS35	22.5756748596611	0.010066850859369	0.0106063636675943	1.2017164119360046e-7	1.825757581581655e-4	0.02517445543720742	0.36665530006321	1.5052762181166912e-7	2.5141640351666883e-4	0.033690096865021224	0.4328677111126401
ENSG00000061936	SFSWAP	18.7497233145843	0.00837508682606306	0.0089140761599434	5.615264597746972e-8	6.006974510686103e-5	0.008621539704102288	0.18136523114700576	7.226164766560572e-8	8.728489867082523e-5	0.012480627492129859	0.23479867375310193
ENSG00000061938	TNK2	21.3603111958628	0.00953006577709328	0.00986860589644035	9.529547029263341e-8	1.3074604911400556e-4	0.01841752850352918	0.30293070306259096	1.1041076930506932e-7	1.616970036145693e-4	0.02249155054576868	0.3427706996251815
ENSG00000061987	MON2	11.3312943906592	0.00507826624362995	0.00421369870241358	9.101397857591564e-9	3.5213129604416693e-6	3.9775014119047825e-4	0.013447111376046483	5.039384465277408e-9	1.3335539499337301e-6	1.2669731408199159e-4	0.0043936072276148375
ENSG00000062194	GPBP1	13.6774642533354	0.00612329419632995	0.00621832322083998	1.7249148998033093e-8	9.801796532205032e-6	0.0012683914924312978	0.03885344852855055	1.8220114417211164e-8	1.0685999523252221e-5	0.0013954509981264351	0.04223961211223781
ENSG00000062282	DGAT2	53.4126829701633	0.0234944950251535	0.0221721560897754	7.773126312726752e-6	0.030899378512105002	0.7281377745121937	0.9990819114225925	5.651267131367987e-6	0.02230656895664107	0.6532391948563439	0.997650760988242
ENSG00000062524	LTK	11.509189894331	0.00515758122191556	0.00112699007449405	9.57899248810179e-9	3.825755306885448e-6	4.3773224693188784e-4	0.01472267163093921	2.355502459749914e-10	6.208322966827495e-9	1.241061945433941e-7	1.883445145178797e-6
ENSG00000062598	ELMO2	61.9396842598784	0.0271434362122362	0.0186136694999538	1.75409077770583e-5	0.06695133104167938	0.8784216171737027	0.999946658698793	2.220820821463576e-6	0.008009921956559918	0.41605535712949504	0.9776707980855827
ENSG00000062650	WAPAL	26.0955538499207	0.0116181850790772	0.0124987568571215	2.2525490095404166e-7	4.409203650852511e-4	0.05505841740275652	0.5563870249768039	3.140783486621501e-7	6.932087431572587e-4	0.08013591084016747	0.6561204258851523
ENSG00000062716	VMP1	20.1187439972609	0.00898110604679872	3.73650808449832e-4	7.451345096498585e-8	9.131323843358796e-5	0.013042314316310977	0.24188151098326627	5.4776627678165823e-11	3.936584391794895e-10	2.615368921432548e-9	1.5851602475080995e-8
ENSG00000063046	EIF4B	407.376352249329	0.155050627558769	0.111948750353413	0.3216599471158469	0.9999999991599469	1	1	0.07822269732307918	0.9999736849453793	1	1
ENSG00000063169	GLTSCR1	90.7787074505162	0.0392848987044166	0.0314988986408794	1.5702086396995885e-4	0.33711613765301984	0.9975270984740667	0.9999999995184783	4.168436347240512e-5	0.13804696038065278	0.963302180846154	0.9999988343475369
ENSG00000063176	SPHK2	48.8702193567223	0.021539451194603	0.0101313696497771	4.827340697510785e-6	0.01890130257059608	0.6140737093508867	0.9963857790320688	1.2350223288493112e-7	1.898488421188116e-4	0.02609742393917336	0.374496503945699
ENSG00000063180	CA11	72.302262720592	0.0315413302584193	0.00702788806514675	4.201677155513117e-5	0.13889765684566213	0.9637706882420818	0.9999988792739927	2.8492795234313917e-8	2.1457220722331805e-5	0.002971982290419617	0.07998387865327683
ENSG00000063241	ISOC2	180.484984128608	0.0751868832014897	0.0667853894940984	0.008493179651044458	0.979900686826828	0.9999999999820756	1	0.004147449970509087	0.9377004663813032	0.9999999970471182	1
ENSG00000063245	EPN1	72.9355647791294	0.0318088156943717	0.0294874413424046	4.416524862738136e-5	0.14432930521474685	0.96660621669345	0.9999991259844431	2.830915542906265e-5	0.1012116485888448	0.9342218682956933	0.9999928128689866
ENSG00000063322	MED29	59.1662559823965	0.0259596051087084	0.0172574409174468	1.360295975960657e-5	0.05307633101113218	0.8388275722930482	0.9998604571307896	1.5035324963941221e-6	0.005072911406177605	0.3236197736145543	0.9531752070569878
ENSG00000063660	GPC1	89.6129906180995	0.038800002849878903	0.0370867966729743	1.4557984471474938e-4	0.32275875919178576	0.9970197717880522	0.9999999991926002	1.1067619779636662e-4	0.273568266129227	0.994345087787069	0.9999999951429821
ENSG00000063761	ADCK1	2020.22212643134	0.476442522630672	0.398145918741524	0.9999944416559051	1	1	1	0.9996760342723731	1	1	1
ENSG00000063854	HAGH	143.552847832521	0.0607360431835341	6.01674009300158e-4	0.002314764126133073	0.8738758190348841	0.9999999080279507	1	9.34037291955292e-11	1.1026867197116985e-9	1.1273385447374551e-8	9.94227182804508e-8
ENSG00000063978	RNF4	91.3229381364035	0.0395111114200408	0.0383391334899465	1.6261581457766017e-4	0.343867898954193	0.9977350532912511	0.9999999996221511	1.3537422926568343e-4	0.3092742386796504	0.996449063218677	0.9999999986852043
ENSG00000064012	CASP8	1318.25071760986	0.372571313572815	0.0593195111226911	0.9989314324206459	1	1	1	0.002000841656822794	0.8533107086484957	0.9999998005574356	1
ENSG00000064115	TM7SF3	1314.17284679116	0.371847361111485	0.356522678497037	0.9988958840673126	1	1	1	0.9978238038447912	1	1	1
ENSG00000064201	TSPAN32	932.496402013075	0.29579618280218	0.0335816493201184	0.9760052787885309	1	1	1	6.0944320584122025e-5	0.18325853849568474	0.9809552341393666	0.9999998378635367
ENSG00000064225	ST3GAL6	55.9915848111257	0.0246009630197171	0.0102427543861046	1.0045855823426209e-5	0.039792945687015746	0.7826351063771227	0.9995976828727088	1.2943679639221273e-7	2.0298752661929154e-4	0.027750153629740093	0.3880971693437715
ENSG00000064313	TAF2	66.6715453272518	0.0291565902691592	0.023461302135301	2.6509613976988256e-05	0.09581334317898127	0.9279488187140441	0.9999903885365303	7.712463124809332e-6	0.030657535971913563	0.7263838844486044	0.9990594092836008
ENSG00000064419	TNPO3	418.910972158976	0.158743882070509	0.132688559593208	0.34910842568059497	0.999999999686906	1	1	0.17382511979952964	0.9999997593958769	1	1
ENSG00000064490	RFXANK	247.020092143683	0.100128934065161	0.0557925631328774	0.0437165278306606	0.9997109873880052	1	1	0.0013690279454227072	0.7914603450785167	0.9999987028712964	1
ENSG00000064545	TMEM161A	97.3185336665863	0.0419961831973974	0.0388200878668551	2.3619549902620385e-4	0.41961511523853123	0.9991642260426145	0.9999999999750515	1.460391750029988e-4	0.3233501397105446	0.9970425831858074	0.999999999209641
ENSG00000064547	LPAR2	578.407911531787	0.206691779689538	0.0249970058660438	0.6994040704186333	0.9999999999999998	1	1	1.0988241165299506e-5	0.043386041014628285	0.8002363975133319	0.9997030161389128
ENSG00000064601	CTSA	52.1725159479034	0.0229615117609757	0.0052760451252211	6.847223712580508e-6	0.027183184209131017	0.6991668155430124	0.9986508471881395	1.0330449717876888e-8	4.322708342718862e-6	5.037607080559114e-4	0.016800306431265732
ENSG00000064607	SUGP2	87.5205817792083	0.0379284078635285	5.27055224126594e-5	1.2680116919150386e-4	0.29740417397910335	0.9958563703116499	0.9999999979757102	1.7929879803091353e-11	3.3808400523582804e-11	7.040046323680826e-11	1.484117273520269e-10
ENSG00000064651	SLC12A2	29.9608703514227	0.0133161739593912	0.00228693262014662	4.2180328385654775e-7	0.0010269062233321247	0.10927064329036329	0.7374631601643462	9.76943748121073e-10	8.036958520918347e-8	3.7783533840540784e-6	1.0202439300432964e-4
ENSG00000064666	CNN2	1458.77063492842	0.396537533783158	0.140854513724197	0.9996500520655238	1	1	1	0.22330474969029956	0.9999999674307347	1	1
ENSG00000064687	ABCA7	1754.9607829138	0.441503923877041	0.178459909481694	0.9999633450009053	1	1	1	0.5003217116756673	0.9999999999987159	1	1
ENSG00000064703	DDX20	65.9928728824102	0.0288683633554814	0.0160932522760174	2.5023163348958377e-5	0.09126261825961202	0.9220884208738538	0.9999876439606505	1.0568908256347598e-6	0.0033109463467189126	0.24951735446821555	0.9165132915485766
ENSG00000064726	BTBD1	31.2651154327904	0.0138877981178063	0.00286980035659183	5.147113802950187e-7	0.0013327246730684417	0.1330693994798975	0.7866540266354395	1.7100404425818283e-9	2.1342018785563965e-7	1.3217120036768115e-5	4.093096581121447e-4
ENSG00000064787	BCAS1	313.015178103547	0.123574142314418	0.123545749318187	0.12623898814360712	0.9999979662082189	1	1	0.1261041952329427	0.9999979529851585	1	1
ENSG00000064886	CHI3L2	2167.77138172387	0.494048388836566	0.484276120802201	0.9999979372043439	1	1	1	0.9999964122807331	1	1	1
ENSG00000064933	PMS1	148.349513706259	0.0626383533544023	0.0174460382012265	0.0027992759125058386	0.8979100840560809	0.9999999680892536	1	1.5893618872109272e-6	0.005419073363009952	0.33618412995184965	0.9575789703142049
ENSG00000064999	ANKS1A	34.4849055136422	0.0152961350192697	0.00742521534976541	8.216841144159659e-7	0.0024222371392503828	0.20326510938483777	0.8799028266599637	3.507750767628437e-8	2.9525011525644018e-5	0.004163235300674306	0.10479310202988734
ENSG00000065000	AP3D1	68.8551965899411	0.030082810259262	0.0268570139369564	3.181355332237956e-5	0.1113970061615348	0.9443635178462727	0.9999957663572296	1.6507733177961725e-5	0.06338986410939684	0.8696071847919202	0.9999324674831241
ENSG00000065029	ZNF76	98.926530248927	0.0426604849090703	0.00490070050133587	2.6009822932504534e-4	0.4401291007084912	0.9993658922318057	0.9999999999881303	8.102568394008358e-9	2.914528813402484e-6	3.193227818992783e-4	0.01090376360038714
ENSG00000065054	SLC9A3R2	11.9128896112548	0.00533752444672237	1.67974786516712e-16	1.0739105049673014e-8	4.6018925833335445e-6	5.4122319952421e-4	0.017963936480119846	1.3510859098175843e-11	1.3510859098175843e-11	1.3510859098175843e-11	1.3510859098175843e-11
ENSG00000065060	UHRF1BP1	2919.69180401871	0.568067486407611	0.0683493745411984	0.9999999756549968	1	1	1	0.004776261932362247	0.9488738309389118	0.9999999988260453	1
ENSG00000065154	OAT	361.538021192095	0.140047529117989	0.139065690558939	0.21815191932587263	0.9999999601743563	1	1	0.21195689903735182	0.9999999491839325	1	1
ENSG00000065183	WDR3	60.6588394402539	0.026597068527418	0.0274461406720638	1.5615954910397356e-5	0.06027170921024627	0.86119175876984555	0.99991649282504	1.869299345580444e-5	0.07086016861831379	0.8872282158108904	0.9999585201643297
ENSG00000065268	WDR18	802.148918281061	0.26542335932847	0.199334761970437	0.9342956194971173	1	1	1	0.6517988776619501	0.9999999999999974	1	1
ENSG00000065308	TRAM2	312.102288903151	0.123258167835845	0.112163159535762	0.12474373764862245	0.999997814244237	1	1	0.07897860999387385	0.999974854592726	1	1
ENSG00000065413	ANKRD44	1075.49043094551	0.326352163200469	0.329738132953956	0.9923829423301227	1	1	1	0.9933440304931264	1	1	1
ENSG00000065457	ADAT1	1109.05240790268	0.333143571206614	0.286393842138033	0.994197042047814	1	1	1	0.9667361246105765	1	1	1
ENSG00000065485	PDIA5	132.537081145762	0.0563379349928089	0.0533672397551343	0.001454099134202802	0.8020470064587728	0.9999990238255795	1	0.0010392324341876868	0.7398096218925168	0.9999955178827298	1
ENSG00000065491	TBC1D22B	35.3498337159851	0.0156737696243521	0.0132153783389956	9.267819859326565e-7	0.002814912084251886	0.2246507708795652	0.898566734612214	4.070121020216533e-7	9.796225081115661e-4	0.10536642527049811	0.7281119806484716
ENSG00000065526	SPEN	15.6295607776484	0.00699112279236982	0.0053962367818736	2.7939754843053777e-8	2.0817743929701926e-5	0.0028776491136904836	0.07790407340164873	1.114168068916399e-8	4.882908189229873e-6	5.791705271853687e-4	0.019131999512404074
ENSG00000065548	ZC3H15	12.9762591414011	0.00581119440400615	0.00664967077025985	1.435643959268873e-8	7.326681437769267e-6	9.169030923310562e-4	0.029114173783784558	2.3217625932936414e-8	1.5621362831841346e-5	0.0021133476730477163	0.06029074406836077
ENSG00000065559	MAP2K4	42.0745306040131	0.0185999753919595	0.0162681689181461	2.21231907315822e-6	0.007974669653118882	0.415105473259463	0.9774954632517681	1.1156157567748792e-6	0.0035378879270603347	0.26020452156678664	0.9231908639019402
ENSG00000065600	TMEM206	185.87922856928	0.0772604153866101	0.0402099867184976	0.009988430989312569	0.9851768876482003	0.9999999999951825	1	1.8099040347840933e-4	0.3649149013724724	0.9982787438174051	0.9999999998222894
ENSG00000065621	GSTO2	601.760969374158	0.213257244644511	0.171773125590797	0.7386001044807206	1	1	1	0.4488670807051063	0.9999999999913658	1	1
ENSG00000065665	SEC61A2	409.442346865864	0.155714517701403	0.120630038724499	0.32655114174235067	0.9999999992957792	1	1	0.11271769962355305	0.9999960405385732	1	1
ENSG00000065675	PRKCQ	63.6161400333569	0.027857632864877	0.00534186369601066	2.0363458855032768e-5	0.07641548727448566	0.8983887444620782	0.9999706366325182	1.0768442693098734e-8	4.6221724518957785e-6	5.439539337750432e-4	0.018048343737982808
ENSG00000065717	TLE2	37.7562635766077	0.0167229138883205	0.0168889257848612	1.2816077555877214e-6	0.004187920355844588	0.288776589366862	0.9385196255610062	1.347289359965309e-6	0.00444815492754469	0.299465022864286	0.9434364441642581
ENSG00000065802	ASB1	712.739074267425	0.243028464591744	0.236771165178376	0.874164121316839	1	1	1	0.8513550729985336	1	1	1
ENSG00000065809	FAM107B	540.948908181152	0.195928619533027	0.197110338730538	0.6285586685823296	0.9999999999999927	1	1	0.6367018114912402	0.9999999999999949	1	1
ENSG00000065882	TBC1D1	252.724489648504	0.102204871875729	0.101664613752583	0.04879603783875752	0.9998071720711464	1	1	0.047435769506098846	0.9997856088957526	1	1
ENSG00000065883	CDK13	43.0138990029347	0.0190073507820196	0.0191468009273967	2.4775893610051725e-6	0.009077627786128861	0.44340610977498784	0.9822191440218414	2.574486253625885e-6	0.009481801958382552	0.4530999768153844	0.983619342551067
ENSG00000065911	MTHFD2	23.6182366539442	0.0105268517914918	0.00199972767011572	1.4568206652132432e-7	2.400617844809938e-4	0.03231789260167295	0.42304700555685015	7.196820916988145e-10	4.6802333120155026e-8	1.8650229289818299e-6	4.57213530693501e-5
ENSG00000065970	FOXJ2	163.170505008208	0.0684678266474457	3.66552008052494e-5	0.004826870299650898	0.9496459805358061	0.9999999989058452	1	1.654043568777297e-11	2.686484368297215e-11	4.8642645467111834e-11	9.045719728817403e-11
ENSG00000065989	PDE4A	706.217234205109	0.24134135564168	0.219974176572512	0.8682965819863541	1	1	1	0.7752662283553218	1	1	1
ENSG00000066027	PPP2R5A	1450.50337231156	0.395178324382816	0.305116079305658	0.9996265571536143	1	1	1	0.9828584780546445	1	1	1
ENSG00000066056	TIE1	22.7631275646977	0.0101495906031838	6.12357297557608e-4	1.2445691222051636e-7	1.9194708981085107e-4	0.02636261382250693	0.3767161478648836	9.551004431784804e-11	1.1504235342130187e-9	1.1966063362400803e-8	1.070879338538333e-7
ENSG00000066084	DIP2B	1059.51434569861	0.323070501913876	0.154501124452768	0.9913316179572823	1	1	1	0.317627071653965	0.9999999990282474	1	1
ENSG00000066117	SMARCD1	37.4774289305397	0.0166014634078952	0.00434929865428263	1.2353208791449077e-6	0.004005497668000291	0.2810407547827739	0.9346998700018991	5.553567827831785e-9	1.5667382623485437e-6	1.5361237141675588e-4	0.005327645326384189
ENSG00000066136	NFYC	17.7660022963338	0.00793916892029947	0.00416458539205841	4.544563403374724e-8	4.373919135314264e-5	0.00625254112485818	0.14326122117695506	4.862942271088855e-9	1.2568156431136401e-6	1.1800059572719679e-4	0.004090107338482807
ENSG00000066230	SLC9A3	3750.84882079409	0.628193567341946	0.553947586144121	0.9999999995065889	1	1	1	0.999999941364202	1	1	1
ENSG00000066294	CD84	229.347848907678	0.0936362913948539	0.0919852352439165	0.03027983392196698	0.9990229430362974	0.9999999999999999	1	0.027415093474967622	0.9986839969726646	0.9999999999999998	1
ENSG00000066427	ATXN3	104.683310197235	0.0450312133863744	0.0430801739414774	3.629256601298536e-4	0.5130201691922913	0.9997706793091999	0.9999999999992061	2.76236675663899e-4	0.45309601858485926	0.9994684863784947	0.9999999999926018
ENSG00000066455	GOLGA5	53.9807283576643	0.0237384282480929	0.0207557336989532	8.231717862572374e-6	0.032720131946861186	0.7408175623167699	0.9992323198095363	3.9522154930971e-6	0.015252008890246915	0.5631287930327094	0.993944984127475
ENSG00000066583	ISOC1	844.442837614233	0.275561621593718	0.275208028663421	0.9523202851049315	1	1	1	0.9517711073412684	1	1	1
ENSG00000066651	TRMT11	32.3012955856193	0.014341462951217	0.0106402864454285	6.004507770995815e-7	0.001626426303044215	0.15393500517065672	0.8209746183568607	1.526362687354066e-7	2.563980857991366e-4	0.03428836068202312	0.4370597281779447
ENSG00000066654	THUMPD1	278.914940301658	0.11161441944398	0.034726505138205	0.07705356612403902	0.9999717554577807	1	1	7.447305957553052e-5	0.21095727303385825	0.986999993132772	0.9999999471352111
ENSG00000066697	MSANTD3	106.880604952608	0.0459329991943376	0.0360391482226016	4.102024823041672e-4	0.5402773568394741	0.9998461960220898	0.9999999999997222	9.308500155513766e-5	0.24493921046404799	0.9917571310029175	0.9999999858102445
ENSG00000066739	ATG2B	38.3219240508544	0.0169692033906816	0.0175836640126298	1.3800769582683614e-6	0.004578624272882248	0.30467850762575033	0.9456924948219807	1.6546288574836865e-6	0.005683522167048816	0.3454284060307119	0.9605633173210189
ENSG00000066827	ZFAT	92.3987213719242	0.039957953841587	0.0405187344614562	1.741696900126044e-4	0.3572944841265856	0.9980986109962673	0.9999999997665182	1.8965567905315783e-4	0.37429122539950266	0.9984775745872151	0.9999999998729736
ENSG00000066855	MTFR1	228.601242873873	0.0933599309153206	0.0317707673763611	0.02978550887006559	0.9989726482331869	0.9999999999999999	1	4.3853990001174736e-5	0.14354944485908627	0.9662150612877615	0.9999990944381995
ENSG00000066923	STAG3	97.5741180163237	0.042101832799134	0.00465291435711986	2.3986673723641605e-4	0.42287496797217816	0.9991999235805082	0.9999999999778214	6.86003098770982e-9	2.2195698988758394e-6	2.3208533660279418e-4	0.008004734577141348
ENSG00000066926	FECH	142.340834244974	0.0602541479965855	0.0628984320378296	0.0022037057621827616	0.8671434793058939	0.9999998801564208	1	0.0028715571554570607	0.9008931912859747	0.9999999724346419	1
ENSG00000066933	MYO9A	16.5255974941578	0.00738895969385434	0.00261162744416693	3.4428267570163484e-8	2.869402696847878e-5	0.0040405717663308804	0.10235096663364784	1.3462366776906265e-9	1.4092134903442854e-7	7.79176209975141e-6	2.2903530361095825e-4
ENSG00000067057	PFKP	1459.42550345524	0.396644938750558	0.394884194514451	0.999651847282358	1	1	1	0.9996212786494028	1	1	1
ENSG00000067066	SP100	21.1169136278388	0.0094224953189325	0.00790990497655311	9.087659247342117e-8	1.2204106161262107e-4	0.017249479585846217	0.2905823806815585	4.479323056916229e-8	4.279554656139162e-5	0.006114522114689991	0.14087975098211347
ENSG00000067141	NEO1	1090.51825762115	0.3294101324198	0.319940731247887	0.9932560574153627	1	1	1	0.9902070184324665	1	1	1
ENSG00000067167	TRAM1	106.246922166353	0.0456731059604836	0.0233046343717958	3.9607092089366525e-4	0.53246228645468	0.9998273113780686	0.9999999999996236	7.4316233722449e-6	0.029534925135039858	0.7180144744743533	0.9989459796178404
ENSG00000067182	TNFRSF1A	123.942795674816	0.052877909778141	0.0188246809983576	9.815091605407389e-4	0.7284961495898854	0.9999942720531148	0.9999999999999999	2.3554321760821395e-6	0.008568992790225383	0.43070792694575777	0.9802232277262135
ENSG00000067191	CACNB1	15.6787027814843	0.0070129499207457	0.00784339460193936	2.8266995966141906e-8	2.1195380047855927e-5	0.0029333521335466184	0.079134467534421	4.3339686062182636e-8	4.0715790213141645e-5	0.005809940771277611	0.13555201222835056
ENSG00000067208	EVI5	267.564396550246	0.107560791962333	0.0833443138153526	0.06379570659609957	0.9999342813373763	1	1	0.015598803293102592	0.9942517117497012	0.9999999999999091	1
ENSG00000067221	STOML1	392.517670914077	0.150244982181017	0.132499143976254	0.2869211113486312	0.999999997030053	1	1	0.17275097979916276	0.9999997482130677	1	1
ENSG00000067334	DNTTIP2	22.9311265852006	0.0102237319342536	0.0107836054333107	1.2840646390621657e-7	2.0069029058222831e-4	0.027462513056723648	0.38576927850053355	1.6182486384241912e-7	2.7838355687015426e-4	0.03690206334546264	0.45477156204378966
ENSG00000067365	METTL22	185.777599963462	0.0772214355833573	0.0767778561858137	0.009958525392325113	0.9850904775984537	0.9999999999950611	1	0.009623166146398132	0.9840747186890952	0.9999999999934474	1
ENSG00000067533	RRP15	58.591343536406	0.0257138445217963	0.0252973577484127	1.2889050283071413e-5	0.050470207883534735	0.8295338350182696	0.9998303858619686	1.175291697941283e-5	0.04626177452692937	0.8129117203477941	0.9997647524805131
ENSG00000067596	DHX8	84.1647839448973	0.0365272416848595	0.0350834042888075	1.0095652585351278e-4	0.25812314302627537	0.993074420857912	0.9999999913680844	7.918540056028878e-5	0.21997243392953392	0.9884932941581611	0.999999962912139
ENSG00000067606	PRKCZ	65.3549253455023	0.0285972759069893	0.0235582374285728	2.3691250302104727e-5	0.08711134070512971	0.916225247973823	0.9999843784295473	7.890777817709527e-6	0.03136775449840734	0.7314868134074712	0.9991237032853142
ENSG00000067836	ROGDI	2171.33852757564	0.49445938042367	0.337254930232464	0.9999979850190696	1	1	1	0.9950922432267015	1	1	1
ENSG00000068024	HDAC4	109.663518697844	0.0470726857409604	0.0485359455073403	4.7732923974863617e-4	0.574079239503466	0.9999080442065975	0.9999999999999275	5.769439000185006e-4	0.6161051395637874	0.9999532091326193	0.9999999999999875
ENSG00000068079	IFI35	136.098789868664	0.0577644666063643	0.0327194033378568	0.0016976665561448945	0.8279561618990801	0.999999540152648	1	5.22036033195894e-5	0.16369959209766793	0.9748584485522005	0.9999996291951729
ENSG00000068097	HEATR6	1941.58142123895	0.466548944910687	0.387176842016695	0.9999904113696921	1	1	1	0.9994547320350393	1	1	1
ENSG00000068120	COASY	51.7769952408253	0.0227914074969918	0.0125247614162264	6.572528405413003e-6	0.026070535549909568	0.689565469894819	0.9984771634495827	3.1710070802493107e-7	7.022005985168889e-4	0.08097450342754597	0.6588923741904317
ENSG00000068305	MEF2A	95.5242848420553	0.0412538471167756	0.0399858704427016	2.117242212941184e-4	0.3967662966127824	0.9988674837099238	0.9999999999432384	1.749142103033563e-4	0.3581369747637213	0.998119401694908	0.99999999977346
ENSG00000068383	INPP5A	62.78033162395	0.0275016963981325	0.0273895293407044	1.8911376495012178e-5	0.0715938661785338	0.8887888863587242	0.9999604009234445	1.8472702440375244e-5	0.07011774678231131	0.8856202962242543	0.9999565151116142
ENSG00000068489	PRR11	150.046314687844	0.0633094441057818	0.0186639006983055	0.002988907144228614	0.9054652999037965	0.9999999781451646	1	2.252247703338206e-6	0.008140295067352366	0.4195408751605324	0.9783036012699519
ENSG00000068650	ATP11A	47.063403191627	0.0207596325384504	0.0200444814209453	3.956204157939958e-6	0.015268698487778232	0.5633879013525461	0.9939602099612982	3.2801573064400458e-6	0.012436068821094604	0.5151148391776261	0.9904957620569781
ENSG00000068654	POLR1A	225.11554383051	0.0920674462188584	0.036171131952308	0.0275527615533383	0.9987032146121426	0.9999999999999998	1	9.515971315421368e-5	0.248476580223281	0.9921342948396762	0.9999999875895926
ENSG00000068697	LAPTM4A	18.5399443393133	0.0082821592646564	0.00425114403787582	5.3708111291683736e-8	5.6207218478543375e-5	0.008064712339255764	0.17283820395123595	5.177354100993625e-9	1.3947408858960841e-6	1.33691264981195e-4	0.0046370902975472195
ENSG00000068745	IP6K2	304.451241457072	0.120600959312388	0.0454659640871596	0.11258874940021779	0.9999960146325119	1	1	3.8510533816715764e-4	0.5262089297468981	0.9998106883620932	0.9999999999995208
ENSG00000068784	SRBD1	400.241247514647	0.152749769852026	0.150987859785863	0.30487344507822733	0.9999999984575182	1	1	0.29220800672033975	0.9999999975528139	1	1
ENSG00000068796	KIF2A	11.8910042054412	0.00532777101705933	1.66272580581708e-5	1.067340171800879e-8	4.556589258797317e-6	5.35127516021805e-4	0.01777531829908785	1.4860668251515108e-11	1.91562321560923e-11	2.7176261241379507e-11	4.0359382502686e-11
ENSG00000068878	PSME4	139.12608252259	0.0589735680315246	0.0513517553540117	0.0019297900085948338	0.8479260508122506	0.9999997595095022	1	8.184397055708281e-4	0.6913614807570108	0.9999878250177487	0.9999999999999996
ENSG00000068903	SIRT2	53.5589607813626	0.023557322112709	0.0118961927759789	7.88907756887891e-6	0.03136099192632458	0.7314389003949882	0.9991231161198559	2.506169829441518e-7	5.103882329223763e-4	0.06229105964394743	0.5889799922474505
ENSG00000069020	MAST4	976.631766377526	0.305519008053987	0.107097979370531	0.9831105887232405	1	1	1	0.0623883138276663	0.9999277455424583	1	1
ENSG00000069188	SDK2	2748.89536271721	0.553220617874713	0.553396313965086	0.9999999386737534	1	1	1	0.9999999393348763	1	1	1
ENSG00000069248	NUP133	95.3136389748423	0.0411666209581198	0.0396612442339837	2.0899622588721467e-4	0.3940901086945443	0.9988267106886883	0.9999999999375174	1.6642238193198544e-4	0.3483662839238988	0.9978639051046299	0.9999999996784616
ENSG00000069275	NUCKS1	128.940061707885	0.0548928701118641	0.00648166506235314	0.0012377687032945062	0.7731682247051782	0.9999979357260966	1	2.1150799223157435e-8	1.3505320982099e-5	0.0018041233021709457	0.05272161629436123
ENSG00000069329	VPS35	14.5033267563947	0.0064906266116183196	0.00175401221247503	2.1257034021893162e-8	1.3611587580286688e-5	0.001819610229016888	0.05310764932899781	5.431276539624719e-10	2.831371492817425e-8	9.601951840298995e-7	2.124947134252153e-5
ENSG00000069424	KCNAB2	798.529569116315	0.264542569761901	0.202847411575618	0.9324909373111087	1	1	1	0.6749903290930781	0.9999999999999991	1	1
ENSG00000069493	CLEC2D	460.183513442059	0.17169850912599	0.154686760466951	0.44829074493798315	0.9999999999911824	1	1	0.31898786777732435	0.9999999990748675	1	1
ENSG00000069712	KIAA1107	13.7144335384416	0.00613974343923476	0.0053108203985667	1.7414076625144048e-8	9.950163319505378e-6	0.0012896659783679931	0.03942502302145168	1.0560001206805225e-8	4.478771712390639e-6	5.246717517556343e-4	0.01745113876374127
ENSG00000069849	ATP1B3	66.3269447063814	0.0290102624473506	0.0266205485068641	2.5745728901571674e-5	0.09348534475121151	0.9250207378430281	0.9999890786664426	1.56947600398194e-5	0.060548935239444934	0.8619683880559527	0.9999180733980875
ENSG00000069869	NEDD4	588.578826722525	0.209564645692842	0.210571726737606	0.7169529009688713	0.9999999999999999	1	1	0.7229593900356377	0.9999999999999999	1	1
ENSG00000069943	PIGB	15.6030948170585	0.00697936715744944	0.00790124748305429	2.7764824883647066e-8	2.0616772237413983e-5	0.002848010518969768	0.07724668246934552	4.4601738524718826e-8	4.25197585429693e-5	0.0060741635997833	0.14017957396587555
ENSG00000069966	GNB5	235.162569430598	0.0957828912670078	0.0846605155409678	0.034328440094710366	0.999341481715243	1	1	0.017083132250776734	0.9953642223538506	0.9999999999999623	1
ENSG00000069974	RAB27A	10.3818768901721	0.00465475307064798	0.00102254547761003	6.868641211354998e-9	2.2241454280536033e-6	2.3264870945671756e-4	0.00802370934001917	2.0032719927343123e-10	4.605171466387503e-9	8.239269355669876e-8	1.1478113407514812e-6
ENSG00000069998	CECR5	325.596998770461	0.127905948556557	0.132388252845562	0.14779446349890724	0.9999992526836975	1	1	0.17212375912923294	0.9999997414318587	1	1
ENSG00000070010	UFD1L	92.6462398288812	0.0400607054521821	0.0253004965321613	1.7692344248809722e-4	0.3603973993511551	0.9981740869655165	0.9999999997910803	1.1761144545152646e-5	0.046292524972081583	0.8130411260178796	0.9997653276790487
ENSG00000070018	LRP6	348.866272354656	0.135805540408641	0.129251185695363	0.19199433040724068	0.9999998867892003	1	1	0.1548837369138234	0.9999994550862015	1	1
ENSG00000070019	GUCY2C	423.543092772115	0.160217964265516	0.102269286433977	0.3602095819729779	0.9999999997896701	1	1	0.04896004222761707	0.9998095999458904	1	1
ENSG00000070061	IKBKAP	92.9184034893189	0.0401736625680959	0.0422592764214858	1.7999352635444943e-4	0.36381466632146464	0.9982538096892818	0.9999999998151475	2.4542793086235193e-4	0.4277353295938071	0.9992504526450788	0.9999999999813951
ENSG00000070081	NUCB2	463.240910025164	0.172642310384579	0.171062887487879	0.4555793594374362	0.9999999999932444	1	1	0.44338085299132746	0.9999999999894545	1	1
ENSG00000070087	PFN2	820.526377608198	0.269863265667064	0.219641742852983	0.942790932890355	1	1	1	0.7735352110073487	1	1	1
ENSG00000070182	SPTB	297.185123643741	0.118062482116354	0.0493864852270018	0.10168007012618063	0.99999298941232	1	1	6.425236931868472e-4	0.6396823323800949	0.9999686466529527	0.9999999999999956
ENSG00000070190	DAPP1	267.77390667079	0.107635949534149	0.0955140010462984	0.0640262869128464	0.9999352874728513	1	1	0.03380067519495378	0.9993078068951063	1	1
ENSG00000070269	TMEM260	53.6071638008148	0.0235780237915855	0.0236248403811125	7.927609491198417e-6	0.03151420422086004	0.7325212785095486	0.999136305439957	8.01534878014376e-6	0.03186272837183668	0.7349592519331928	0.9991654437965688
ENSG00000070371	CLTCL1	1664.6316671371	0.428517246878107	0.088183821352996	0.9999282070797667	1	1	1	0.0215928195375773	0.997437434523972	0.9999999999999966	1
ENSG00000070404	FSTL3	201.216079649489	0.0831053788799461	0.0886637550301956	0.015340397903688685	0.9940250759369357	0.9999999999998934	1	0.022270992832601144	0.9976406528780584	0.9999999999999976	1
ENSG00000070413	DGCR2	118.838933805289	0.0508110806980359	0.047621940354695	7.664294646414493e-4	0.6775587856427109	0.9999841609639197	0.9999999999999992	5.128613100691126e-4	0.5900538392504844	0.9999285009929184	0.9999999999999624
ENSG00000070423	RNF126	29.4276511809935	0.0130822839158856	0.00875591889900258	3.881636884139894e-7	9.199948936551294e-4	0.10034582134345738	0.715461469253031	6.717531741973204e-8	7.837939198973576e-5	0.011230247436548324	0.2184516304253541
ENSG00000070444	MNT	38.3686676717214	0.0169895501212731	0.0163578378149537	1.3884954673804017e-6	0.00461218089757498	0.3060043590257533	0.9462520562123162	1.1467941815057614e-6	0.003659063529246387	0.2657510970831747	0.9264402403543504
ENSG00000070476	ZXDC	999.32411385506	0.310414260420146	0.294905244602073	0.9859183266625504	1	1	1	0.9752373430150159	1	1	1
ENSG00000070495	JMJD6	892.115747907553	0.286658922794685	0.129552614035411	0.9670351839567909	1	1	1	0.1564974865078077	0.9999994924799492	1	1
ENSG00000070501	POLB	42.1666917881958	0.0186399578515869	0.0188215915007408	2.2372204794285366e-6	0.008077943178759206	0.41787925488919375	0.9780039893265667	2.353411655775517e-6	0.008560589382918371	0.43049322892704234	0.9801878164725795
ENSG00000070526	ST6GALNAC1	1785.9471294006	0.445823939186094	0.266805841251041	0.999970794013436	1	1	1	0.9370470530808549	1	1	1
ENSG00000070540	WIPI1	386.221527065685	0.148192132961363	0.111805896314021	0.27248744301708994	0.999999994944692	1	1	0.07772172085259044	0.9999728766293748	1	1
ENSG00000070610	GBA2	880.27098854475	0.283933563161827	0.00450238692554727	0.963845761428017	1	1	1	6.184309064849458e-9	1.871451029811233e-6	1.897343622124792e-4	0.006568438964284384
ENSG00000070614	NDST1	1974.36490040247	0.470718439450278	0.471141621358466	0.9999923719807842	1	1	1	0.9999925476790948	1	1	1
ENSG00000070669	ASNS	1034.75802721448	0.3179216453458	0.309724132408342	0.9894125588665744	1	1	1	0.9855498262185275	1	1	1
ENSG00000070718	AP3M2	109.760851141764	0.0471124970135768	0.0347347141639451	4.798326649846363e-4	0.5752445668308377	0.9999096988271814	0.9999999999999308	7.457867850491073e-5	0.21116266548368068	0.9870362231712049	0.9999999475630416
ENSG00000070731	ST6GALNAC2	889.474464974935	0.286052989015977	0.262163641115005	0.9663481048247189	1	1	1	0.9274098795211878	1	1	1
ENSG00000070756	PABPC1	19.3253675361796	0.00862999536214887	0.00865537550450189	6.3344982925706e-8	7.185781300766969e-5	0.010306942921106566	0.2058209491131906	6.410178132743027e-8	7.313335470360283e-5	0.010488041108379198	0.20833833702414783
ENSG00000070759	TESK2	249.191103126651	0.100920136481582	0.0140929629052938	0.04560570387560714	0.9997520855667396	1	1	5.520848554985136e-7	0.0014595318897624443	0.14229191941359354	0.8026928939638038
ENSG00000070831	CDC42	280.082025838899	0.11202913462206	0.089403794902968	0.07850553430893392	0.9999741294942757	1	1	0.023348163273588907	0.997924676039616	0.9999999999999986	1
ENSG00000070882	OSBPL3	309.579046132784	0.122383622131148	0.113453138420296	0.12066038648979516	0.9999973336543566	1	1	0.08362815849779326	0.9999808998376215	1	1
ENSG00000070915	SLC12A3	75.9405223848093	0.033075997241396	0.0148618373449516	5.567788320748335e-5	0.17164794943887862	0.9775631218981186	0.9999997361597857	7.136368985749542e-7	0.0020276397492274834	0.1799463832498055	0.8552640420866154
ENSG00000070950	RAD18	39.2552536133622	0.0173753069957806	0.0173108159994997	1.5566906299557814e-6	0.0052870813520427	0.3314573562534161	0.9559709819272794	1.527407819001958e-6	0.005169010329787227	0.32716276890038276	0.9544595366141088
ENSG00000071051	NCK2	199.194811799693	0.0823393018322107	0.0821698463256513	0.01453418814636731	0.9932417626347649	0.9999999999998228	1	0.014360383086992168	0.9930562078156627	0.9999999999998017	1
ENSG00000071082	RPL31	17.1872368491328	0.00768252051774594	0.00939535919707822	3.998683351102983e-8	3.6041486614846185e-5	0.005123556657636974	0.1231567121755579	8.978971444140171e-8	1.1992521604220485e-4	0.016964030829134225	0.2874943085025984
ENSG00000071127	WDR1	41.964507097276	0.0185522394209129	0.0011319766389989	2.1829021046304575e-6	0.007852750183739876	0.4117955634749665	0.9768746755241922	2.3733015552807046e-10	6.294886834012914e-9	1.2647870817339424e-7	1.926914971139837e-6
ENSG00000071205	ARHGAP10	38.4703057856977	0.0170337886166337	0.0169440028924255	1.4069520353210407e-6	0.004685829619926252	0.30889316379760345	0.9474518414789815	1.3697111718169452e-6	0.004537337603032543	0.303038855216176	0.94499262306688
ENSG00000071242	RPS6KA2	508.051237147427	0.186232292938408	0.0515851641882746	0.5589178937924422	0.9999999999998668	1	1	8.417918882164255e-4	0.6972178274830259	0.9999891393413125	0.9999999999999997
ENSG00000071243	ING3	27.4184396912334	0.0121999709564545	0.00834012370643766	2.8108105398771954e-7	5.966601473175182e-4	0.0709101124298207	0.623493585697391	5.522214141517878e-8	5.859056198120882e-5	0.008408562592396973	0.17813204184755072
ENSG00000071246	VASH1	6147.94340890069	0.734701838729136	0.651903674087074	0.9999999999997176	1	1	1	0.9999999999006667	1	1	1
ENSG00000071462	WBSCR22	455.920184177174	0.17037884271476	0.0111377431487055	0.4380967867897779	0.9999999999872206	1	1	1.865731125150205e-7	3.3969470326433715e-4	0.04397754883392069	0.4983636450032206
ENSG00000071575	TRIB2	292.830816560454	0.11653423486794	0.116346557867343	0.0954445039318289	0.9999901929829077	1	1	0.0946959116399605	0.9999897825931707	1	1
ENSG00000071894	CPSF1	5270.26976284999	0.703615481112484	0.201459223595368	0.9999999999973266	1	1	1	0.6659229778742319	0.9999999999999987	1	1
ENSG00000071967	CYBRD1	2419.63835878209	0.521514431012086	0.485261358787791	0.9999995825612618	1	1	1	0.9999966057467069	1	1	1
ENSG00000072042	RDH11	28.6329412763822	0.012733488312294	0.00656888864499352	3.4227463951985726e-7	7.779981105309197e-4	0.08791425826957	0.6807242355719363	2.2203807903409256e-8	1.4570717739914585e-5	0.0019596050050153524	0.05656324863547224
ENSG00000072071	LPHN1	107.651172100544	0.0462488423483988	0.0402303775468522	4.279494256695937e-4	0.5497250999584983	0.9998664884020314	0.9999999999998083	1.8155207092762637e-4	0.3655328034978864	0.9982925937965871	0.9999999998261786
ENSG00000072134	EPN2	17.168354134327	0.0076741449084954	0.00377864609003081	3.9818418673398526e-8	3.5811351317804885e-5	0.005089703233589593	0.12253054317850665	3.6423510874072917e-9	7.749203452256381e-7	6.570993282550841e-5	0.002250213487994812
ENSG00000072163	LIMS2	1375.44773871561	0.38255256053505	0.0533372577451058	0.9993235516925927	1	1	1	0.0010356157202471294	0.7391249019215371	0.9999954497995576	1
ENSG00000072195	SPEG	305.538872163458	0.120979675082856	0.104032685033961	0.11427519523762597	0.9999963394772835	1	1	0.05360228058886807	0.9998657611102507	1	1
ENSG00000072210	ALDH3A2	621.012882400956	0.218588548558828	0.0450024405435657	0.7679932603929751	1	1	1	3.6149683278874356e-4	0.5121444774532387	0.9997677639073683	0.9999999999991792
ENSG00000072274	TFRC	144.109298562097	0.0609571218427791	0.0574666173822213	0.0023672382043431472	0.8768752212190664	0.9999999185836402	1	0.0016441959794118999	0.8227582945086361	0.9999994613054022	1
ENSG00000072310	SREBF1	575.381650877014	0.205832949749991	0.0206294040172269	0.6940409161214934	0.9999999999999997	1	1	3.824839793664658e-6	0.014718838175791338	0.5547063812680609	0.9934320879406942
ENSG00000072401	UBE2D1	1738.68397392798	0.439207571349218	0.00539035688336628	0.9999586698826421	1	1	1	1.1100812935538329e-8	4.854113440422303e-6	5.752717405768104e-4	0.01901247107266324
ENSG00000072422	RHOBTB1	42.9962534813698	0.0189997015749473	0.0192086622570527	2.472366610661858e-6	0.009055859587119186	0.44287430841258035	0.9821393260110248	2.618506467100268e-6	0.0096655974063109	0.45739861237880797	0.9842081524489533
ENSG00000072609	CHFR	90.6134254008927	0.0392161771435961	0.0334120795840915	1.553541013743498e-4	0.3350715232452737	0.9974604701249989	0.9999999994817587	5.913247336719607e-5	0.17932112066752326	0.9798724808790213	0.9999998089985899
ENSG00000072694	FCGR2B	2833.06370456671	0.560662574272777	0.456706143020204	0.9999999613279121	1	1	1	0.9999836467915019	1	1	1
ENSG00000072736	NFATC3	566.641305824558	0.203342032087223	0.00485591889842477	0.6781894125529317	0.9999999999999992	1	1	7.865378903737508e-9	2.7765997729911618e-6	3.0176453762098543e-4	0.01032644068950106
ENSG00000072756	TRNT1	291.772816136949	0.116162104415832	0.115797785640522	0.09396383183486101	0.9999893630433895	1	1	0.09252852004115864	0.9999884847327632	1	1
ENSG00000072778	ACADVL	259.889613162721	0.104798863539443	0.00619415076181389	0.05571213908842221	0.999884854633523	1	1	1.7968935672740827e-8	1.0454801218529042e-5	0.0013621666744514371	0.041358876557594404
ENSG00000072786	STK10	29.6680096970662	0.013187727953273101	0.0102816231042302	4.0303312376366307e-7	9.669753984151708e-4	0.10431078114573988	0.7255120351660103	1.3156394573776709e-7	2.0775131103167865e-4	0.02834486772170952	0.3928596722379738
ENSG00000072818	ACAP1	665.457555146045	0.230624621027345	0.0340206509009287	0.8260788336558629	1	1	1	6.585830135019677e-5	0.19365351732934422	0.9835205332393303	0.999999894187544
ENSG00000072858	SIDT1	578.906710431755	0.206833156773008	0.136934693827712	0.7002818257611603	0.9999999999999998	1	1	0.19880030336586063	0.9999999140949056	1	1
ENSG00000072864	NDE1	3074.38220632932	0.580687620673469	0.0244823316125508	0.9999999890365666	1	1	1	9.777525861620617e-6	0.03875981650727944	0.7771660549731597	0.9995597527356584
ENSG00000072952	MRVI1	595.936527035946	0.211629957321243	0.106770518875569	0.7291883710117859	0.9999999999999999	1	1	0.06140546931564839	0.9999227478292267	1	1
ENSG00000072954	TMEM38A	12.0431668860631	0.00539557973821117	0.00282247286769598	1.1137107791547862e-8	4.879683245695432e-6	5.787337569357343e-4	0.019118614478979223	1.638217228538963e-9	1.9815630425412678e-7	1.2030589814360226e-5	3.693580261051599e-4
ENSG00000072958	AP1M1	657.20437262406	0.228417688669324	0.229199779160776	0.8162874208432758	1	1	1	0.8198010782546917	1	1	1
ENSG00000073008	PVR	279.381774760932	0.111780352078327	0.0952057859581284	0.07763236383998717	0.9999727295837741	1	1	0.03320307599457051	0.9992671991425277	1	1
ENSG00000073050	XRCC1	34.6581357107318	0.015371791919047	8.47317333460786e-4	8.41876211632453e-7	0.0024970547463655235	0.207469550047241	0.8838417357166812	1.4946810455995774e-10	2.6727968727158213e-9	3.88590014610557e-8	4.590333875231778e-7
ENSG00000073060	SCARB1	912.011623529962	0.29119037000957	0.256693643381024	0.9717962874795848	1	1	1	0.9145239464774229	1	1	1
ENSG00000073150	PANX2	244.525586394145	0.099218116356386	0.0157398902746666	0.0416118814278259	0.9996556213030461	1	1	9.463247936380981e-7	0.002888766806897647	0.2284953978527966	0.901584156316327
ENSG00000073169	SELO	113.996606777384	0.0488418048451161	0.0178680709813908	5.998433774342393e-4	0.6246612447039515	0.9999594574176714	0.9999999999999913	1.7968588058581147e-6	0.0062629982161379605	0.3647080672118005	0.966160177815306
ENSG00000073331	ALPK1	136.831614736776	0.0580574419832103	0.0197912109055299	0.0017516632999099446	0.832960890419852	0.9999996066590775	1	3.0659463129412146e-6	0.011538106880416898	0.49772862442089627	0.9888865537138881
ENSG00000073350	LLGL2	86.3538387791774	0.0374417131175705	0.0172470073420779	1.1724790205347446e-4	0.28353586426531463	0.995035682069716	0.9999999966369884	1.4989032004475433e-6	0.005054296347767329	0.32292843332835264	0.9529205646321025
ENSG00000073417	PDE8A	61.408273627258	0.0269168277932225	0.0257697393357163	1.6719040535684293e-5	0.06412267113771086	0.8714872303267981	0.9999357029099507	1.3048510897339938e-5	0.051054850114186756	0.8316809031336168	0.9998377271702984
ENSG00000073536	NLE1	1711.33885157169	0.43530688047598	0.0222066976134987	0.9999493798351425	1	1	1	5.699543130122109e-6	0.02250500282054224	0.6553200075529306	0.9977061844168973
ENSG00000073578	SDHA	139.125711634562	0.0589734200888204	0.0122231078531147	0.0019297600767148593	0.8479237170719915	0.9999997594902917	1	2.835256273092668e-7	6.037067478837921e-4	0.07159779250239862	0.6260692222083379
ENSG00000073584	SMARCE1	1070.99791718249	0.325432572166256	0.125646121563376	0.9921007879302344	1	1	1	0.13630481064487232	0.9999987362400352	1	1
ENSG00000073605	GSDMB	3583.11352344661	0.617446739404559	0.00788794545802188	0.9999999989917142	1	1	1	4.43088566948191e-8	4.209899822948948e-5	0.006012571657707189	0.13910765746915776
ENSG00000073614	KDM5A	244.699506459251	0.0992816794980344	0.0231669230907685	0.04175634514232984	0.9996597924618859	1	1	7.192101858066735e-6	0.028573593119965435	0.7105346037344593	0.9988357178071964
ENSG00000073711	PPP2R3A	99.9459113572767	0.0430811386024098	0.0301572785784461	2.762747291679135e-4	0.4531258156285741	0.9994687029054639	0.9999999999926099	3.227711206843509e-5	0.1127135990130349	0.9455339096721074	0.9999960397175673
ENSG00000073737	DHRS9	894.264047362626	0.287151003820614	0.28501989913647	0.9675841257779423	1	1	1	0.9651478648525296	1	1	1
ENSG00000073756	PTGS2	23.4934933365557	0.0104718348443328	0.00481419292446688	1.4240750212390907e-7	2.3246344150018583e-4	0.03139281718643372	0.41625832199185697	7.649506805762485e-9	2.6531883348113183e-6	2.861498970586629e-4	0.00981047356295306
ENSG00000073803	MAP3K13	473.059352866726	0.175658717793635	0.0490177998318934	0.47883330927892487	0.9999999999971326	1	1	6.13364228451152e-4	0.629545572783651	0.9999626792375642	0.999999999999993
ENSG00000073849	ST6GAL1	186.310018585471	0.0774256089807545	0.0779410689910933	0.010115957031000988	0.9855381014889486	0.999999999995665	1	0.010522162869644358	0.9866147599345687	0.999999999996884	1
ENSG00000073910	FRY	150.81356721071	0.0636125797897066	0.0599087488485174	0.003077954986795417	0.9087277321090936	0.9999999815956739	1	0.002126844135885597	0.8621518783672919	0.9999998552451109	1
ENSG00000073921	PICALM	27.7213923265347	0.0123331087300999	0.0144675329534935	2.953982488618223e-7	6.381771219411414e-4	0.0749284178074594	0.6382044622671534	6.263483662838354e-7	0.0017169794598015375	0.16003675267573358	0.8297735069958966
ENSG00000073969	NSF	56.9194579028415	0.0249984502988381	0.0144286754591263	1.0991813173877318e-5	0.04339955661048378	0.8002987425204142	0.999703347069296	6.182658710551792e-7	0.0016886335224621796	0.15814221555045072	0.8270954250624326
ENSG00000074071	MRPS34	53.0780051817396	0.0233507187438101	0.0012537597423635	7.51330125525751e-6	0.029861927421378165	0.720491928614893	0.9989806209735079	2.8373881022503156e-10	8.734807988020066e-9	1.9768398573649648e-7	3.293828454098424e-6
ENSG00000074201	CLNS1A	200.14455654402	0.0826994222319627	0.0539305360345237	0.014908972849895674	0.9936210544564847	0.9999999999998604	1	0.0011091747604132784	0.7524664799528311	0.9999966273643817	1
ENSG00000074219	TEAD2	331.518136589018	0.129929759007007	3.90319951081357e-4	0.15852952736129644	0.9999995357491298	1	1	5.721534357405744e-11	4.287870059016541e-10	2.9550195623784248e-9	1.8501952969707247e-8
ENSG00000074266	EED	92.8152044197758	0.0401308345960397	0.0249357918709543	1.7882418524106658e-4	0.3625182576816185	0.9982239753526957	0.9999999998063626	1.0837780328065705e-5	0.04281602788203098	0.7975819131394103	0.9996886630446042
ENSG00000074276	CDHR2	39.8941152113665	0.017653090444742	0.0048198628295231	1.68842069869779e-6	0.005820819560808599	0.35011395573117154	0.9619987263242674	7.678553126666543e-9	2.6696749395593855e-6	2.882304482588749e-4	0.009879363379728057
ENSG00000074370	ATP2A3	66.6375600084836	0.0291421610376401	0.0150302848057311	2.6433429956895793e-5	0.09558216016802146	0.9276643460833606	0.9999902664699588	7.539964648195507e-7	0.0021738400719724105	0.18882258303300659	0.8652378315265556
ENSG00000074416	MGLL	355.130096319923	0.137907633026943	0.135772594363883	0.20475726523775806	0.9999999323600343	1	1	0.19179750485676028	0.9999998858764234	1	1
ENSG00000074582	BCS1L	35.3665913046576	0.0156810832620338	0.00126620438231268	9.289264036871359e-7	0.002823004054181233	0.22507459999172197	0.8989040705039388	2.8880975389000696e-10	9.022386615598066e-9	2.0657961596892704e-7	3.4718230679242623e-6
ENSG00000074621	SLC24A1	71.7986790452693	0.0313285279818643	9.85084085299206e-5	4.0372371974517485e-5	0.13466154272461983	0.9613677418446491	0.9999986355991373	2.2112423003761705e-11	5.776645828348137e-11	1.6001810987376075e-10	4.3691117390665113e-10
ENSG00000074657	ZNF532	167.873000776796	0.0703023153753093	0.0690083343903201	0.0056677042149233525	0.9603931465337787	0.9999999996356761	1	0.005063346229371879	0.9530446034616001	0.9999999992072028	1
ENSG00000074660	SCARF1	18.753660896468	0.008376830923398	0.0073057929709263196	5.6199407127977e-8	6.0144365398584476e-5	0.008632275023645275	0.18152729820164837	3.297691331116681e-8	2.6863611139238408e-5	0.0037702893674533833	0.09688470258408743
ENSG00000074695	LMAN1	445.752731040006	0.167214582901732	0.166640000729707	0.41367843944243343	0.9999999999690972	1	1	0.40925343708616335	0.9999999999637603	1	1
ENSG00000074696	PTPLAD1	24.601968424854	0.0109605038091089	0.0104694465159168	1.7381215944300976e-7	3.077139216639546e-4	0.040324494711364456	0.47659664299111826	1.4226678080042632e-7	2.3213828824864002e-4	0.03135310669676428	0.4159637797870863
ENSG00000074706	IPCEF1	82.7013089871313	0.0359149094432523	0.0359579673530094	9.116760354188624e-5	0.24162863887089225	0.991387050088464	0.9999999839074685	9.182825084252944e-5	0.2427738671802746	0.9915169967251211	0.9999999845937113
ENSG00000074755	ZZEF1	59.6048340195644	0.0261470028182318	0.0150268672511978	1.417002469905615e-5	0.05512583559380435	0.8456608626799357	0.9998798774952965	7.531585444198186e-7	0.0021707896232943114	0.18864034847642208	0.8650408029415688
ENSG00000074800	ENO1	54.1672121289458	0.0238184825812512	0.0202787012111435	8.387223265460264e-6	0.0333345277794882	0.7448978319373398	0.9992763671351873	3.4896294568431685e-6	0.013314294796822002	0.531074573040639	0.9917917345582005
ENSG00000074803	SLC12A1	4259.2066958348	0.657365460893979	0.0836329565947428	0.999999999931676	1	1	1	0.015915443020822595	0.9945149158789613	0.999999999999925	1
ENSG00000074855	ANO8	24.1181626059774	0.0107472783776993	4.30047433164742e-4	1.5945242459736164e-7	2.7266458636898694e-4	0.03622627237200138	0.4502830466988028	6.326061896544388e-11	5.216171938826619e-10	3.907359547028477e-9	2.6333160207947515e-8
ENSG00000074935	TUBE1	37.4428514668389	0.016586400600356	0.016425815697238	1.229681815040351e-6	0.00398333129971673	0.280086448746264	0.9342126160132893	1.1709276607207997e-6	0.003753167402282487	0.26998555587840667	0.9288273326525172
ENSG00000074966	TXK	137.589044072389	0.0583600625470858	0.0513141268152614	0.0018089267502644502	0.8380184916184475	0.9999996654644738	1	8.147264868365589e-4	0.6904115322784348	0.9999875991807918	0.9999999999999996
ENSG00000075131	TIPIN	214.908663147175	0.088261488572389	0.0467820646778806	0.021701491166077114	0.9974713944274355	0.9999999999999968	1	4.593868947669888e-4	0.565538914019601	0.9998950512645456	0.9999999999998977
ENSG00000075142	SRI	219.732841984826	0.09006430466627	0.0803552788601681	0.024342378999549164	0.9981507967915992	0.9999999999999991	1	0.012598740547911103	0.9907545693037506	0.9999999999993471	1
ENSG00000075151	EIF4G3	29.7073501256101	0.013204984250041	0.0104600842946319	4.055124297464019e-7	9.748521519601372e-4	0.10496882079821357	0.7271363770435764	1.4171629447723433e-7	2.3086742564382146e-4	0.03119779962907565	0.4148093205960742
ENSG00000075223	SEMA3C	66.8633467161964	0.0292380158229429	0.0286128136640839	2.694308561113079e-5	0.09712458597608775	0.9295368460294341	0.9999910500214438	2.376590376385046e-5	0.08734591162226013	0.9165707439970047	0.9999845862876584
ENSG00000075234	TTC38	1017.43877904295	0.314272747218936	0.0546674309470155	0.9878266936916257	1	1	1	0.0012065798027809382	0.7684235327804064	0.9999976828270452	1
ENSG00000075239	ACAT1	531.491284889315	0.193164807683807	0.144867360164868	0.6091985799451658	0.9999999999999831	1	1	0.2497064711330632	0.9999999881531596	1	1
ENSG00000075240	GRAMD4	862.351669175218	0.279770695147828	0.28076996677983	0.9584576391147539	1	1	1	0.9598105318019237	1	1	1
ENSG00000075275	CELSR1	702.30783292686	0.240326438239553	0.188870502726122	0.864667492459145	1	1	1	0.5783163572722048	0.999999999999939	1	1
ENSG00000075292	ZNF638	24.5439704127273	0.0109349474709618	0.00802901692148638	1.7203500968232532e-7	3.0332094016360944e-4	0.03981641400131708	0.4734482896872674	4.749883153465362e-8	4.674919847813541e-5	0.006692013354230197	0.15071433772250264
ENSG00000075336	TIMM21	47.8142882846957	0.0210838641116689	0.0209894470840852	4.300312255178795e-6	0.016706836076204268	0.5847494024085944	0.995109705299579	4.197539665962147e-6	0.01627769632527687	0.5785681724617352	0.9947977908023851
ENSG00000075340	ADD2	428.880437287157	0.161910077650161	0.129182920706193	0.3730371354751514	0.99999999986713894	1	1	0.15451954664834733	0.9999994462508509	1	1
ENSG00000075399	VPS9D1	175.301068943555	0.0731854008735826	0.0164430295372088	0.0072243023383251614	0.9732812933337353	0.9999999999375289	1	1.1771078290978565e-6	0.0037773077659544185	0.2710618080534234	0.9294215363541155
ENSG00000075407	ZNF37A	148.23432652891	0.0625927615643403	0.05230945475036	0.002786760438438063	0.8973798690391784	0.9999999672611312	1	9.178503236461077e-4	0.7149872737075181	0.9999923999185856	0.9999999999999999
ENSG00000075413	MARK3	568.088561139304	0.203755565392501	0.0922135149010184	0.6808511016405157	0.9999999999999993	1	1	0.02779863510285796	0.998736708762693	0.9999999999999998	1
ENSG00000075415	SLC25A3	76.9524493211697	0.0335019775197836	0.030695349748447998	6.008717495764593e-5	0.1814030957045718	0.9804531569186704	0.999999824876894	3.5802927115469174e-5	0.1225075925544572	0.9533864764696351	0.9999975638024858
ENSG00000075420	FNDC3B	82.6397039505053	0.0358891162211462	0.036033476523453	9.07738081190601e-5	0.24094369461003584	0.9913083384435831	0.9999999834820963	9.29967219897021e-5	0.24478766920812867	0.9917405583135541	0.9999999857284092
ENSG00000075426	FOSL2	14.3920533957057	0.00644114956183876	0.0023082847050116	2.0676002354669265e-8	1.303377327932509e-5	0.0017354642840650136	0.05100087793471075	9.985168247794718e-10	8.351920222082754e-8	3.971510081579588e-6	1.0792017032068557e-4
ENSG00000075568	TMEM131	24.1169454938969	0.0107467418497609	0.00354915487603191	1.594176083363763e-7	2.725808758167192e-4	0.03621635947296431	0.45021674541413426	3.0421845043093754e-9	5.718365975182493e-7	4.52731041168386e-5	0.001527324668193497
ENSG00000075618	FSCN1	67.7247498201048	0.0296035394229268	0.0256610850832074	2.8965099507560765e-5	0.10315026339350808	0.9363124160668644	0.9999935135776862	1.2740080603146353e-5	0.04992270190067416	0.8274891155694215	0.9998231651568065
ENSG00000075651	PLD1	72.5117121681774	0.0316298109986964	0.0324277032119696	4.271727402438419e-5	0.14068122410885342	0.9647309665951076	0.9999989675894277	4.950184518948131e-5	0.1573481079432606	0.972435758558041	0.9999995110896226
ENSG00000075702	WDR62	37.1626997628313	0.0164643424981	1.88543146408578e-4	1.1847985711410658e-6	0.0038073720368979602	0.27239654467930463	0.9301515409197534	3.131872539086089e-11	1.2625922529707623e-10	5.071661979272335e-10	1.9487457203481995e-9
ENSG00000075790	BCAP29	36.7051814955254	0.0162649431554018	0.0168030686843598	1.11450787554368e-6	0.0035335906322203625	0.26000583076051964	0.92307180756557194	1.3129676125211986e-6	0.004311976327263656	0.2939212201066481	0.9409366185061212
ENSG00000075826	SEC31B	1093.84651769076	0.330083639013252	0.0978434402755417	0.9934355566559057	1	1	1	0.03857492392020967	0.9995525333927429	1	1
ENSG00000075856	SART3	22.2153956787931	0.00990778839606875	0.00223556791336671	1.1228465213175554e-7	1.65653403303323e-4	0.023003839230921086	0.3474636149279763	9.264998768188093e-10	7.32017344517999e-8	3.3465759102790926e-6	8.896040084649393e-5
ENSG00000075884	ARHGAP15	433.613648774037	0.163404966270944	0.156461419147798	0.3844336484395525	0.9999999999116688	1	1	0.3320775460170525	0.9999999994228411	1	1
ENSG00000075914	EXOSC7	250.417575875204	0.101366497032991	0.070628467455972	0.04669679476100663	0.999772741375597	1	1	0.0058288634409664475	0.9620805678602736	0.9999999997009261	1
ENSG00000075975	MKRN2	562.675444283029	0.20220663729902	0.180674594861418	0.6708211060029386	0.9999999999999989	1	1	0.5171983066044754	0.999999999999323	1	1
ENSG00000076003	MCM6	307.249556473508	0.121574680144465	0.0485580360101658	0.11695567410278795	0.9999967984696236	1	1	5.785726891051057e-4	0.6167259261519644	0.9999536899060637	0.9999999999999878
ENSG00000076043	REXO2	20.9519762188746	0.0093495873366401	0.00296962978432185	8.798136930110445e-8	1.164274682486921e-4	0.01649080755531751	0.282311227515478	1.8696001413687213e-9	2.4893511951784575e-7	1.6055221958355403e-5	5.057123503408034e-4
ENSG00000076053	RBM7	86.1373342585419	0.0373513463309141	0.029300150127933	1.1554373879618662e-4	0.2809859190595281	0.9948676585438808	0.999999996306265	2.727795659074328e-5	0.09813277912353136	0.9307290511047059	0.9999915248516482
ENSG00000076067	RBMS2	1914.0067867954	0.46299072195745	0.162737328433795	0.9999883585675656	1	1	1	0.3793370710810562	0.9999999998939744	1	1
ENSG00000076201	PTPN23	28.3625540187124	0.0126147600030152	9.99094390468101e-4	3.2775362324155566e-7	7.34082405954517e-4	0.08392116738420474	0.668397895634715	1.9294144060211238e-10	4.295999445069754e-9	7.487982411902294e-8	1.0220590480614078e-6
ENSG00000076242	MLH1	192.970517282838	0.0799721819643845	0.0780049967751518	0.01224942058849876	0.9901872572632833	0.9999999999991618	1	0.010573424035965173	0.9867431135015705	0.9999999999970094	1
ENSG00000076248	UNG	423.049901089829	0.160061261391769	0.114221764570002	0.35902602755741564	0.9999999997805613	1	1	0.0864817990930552	0.9999838051924081	1	1
ENSG00000076258	FMO4	141.462494797769	0.0599046121246503	0.0596994885633585	0.002125937206923223	0.8620912462790488	0.9999998549179705	1	0.0020813655807219167	0.8590593653746755	0.9999998377556911	1
ENSG00000076321	KLHL20	42.1913696637923	0.0186506633477533	0.00530634439517358	2.243928835299336e-6	0.008105775202107757	0.41862215868025854	0.9781384053865227	1.0530222249727217e-8	4.4584156384530615e-6	5.219397897512357e-4	0.017366298871113406
ENSG00000076351	SLC46A1	75.996963365333	0.033099766497052	0.0255964279871497	5.591636880142303e-5	0.1721848674806038	0.9777338664048095	0.9999997421008888	1.2559545883972234e-5	0.049257458349959427	0.8249592818042308	0.9998139141102003
ENSG00000076356	PLXNA2	120.527631154327	0.0514959232055226	0.051228413877417	8.327982405830214e-4	0.6949861039767213	0.9999886539410829	0.9999999999999997	8.063210864025505e-4	0.6882416706416513	0.9999870694884	0.9999999999999996
ENSG00000076554	TPD52	435.995899376688	0.164155336037608	0.162251492203707	0.39017357380359885	0.9999999999280944	1	1	0.375635062428326	0.999999999878942	1	1
ENSG00000076555	ACACB	915.319335489859	0.291938152879362	0.261678737519615	0.9725209725145134	1	1	1	0.9263363575893905	1	1	1
ENSG00000076641	PAG1	371.428435445332	0.143329613260766	0.142391194677412	0.23944055372667172	0.9999999825075925	1	1	0.2332651192325086	0.9999999778404305	1	1
ENSG00000076650	GPATCH1	574.466181751915	0.205572780054819	0.103263878481656	0.6924057765265828	0.9999999999999997	1	1	0.05154199077825905	0.9998435680588662	1	1
ENSG00000076662	ICAM3	197.761822686053	0.0817954112892503	0.0578385554678098	0.013982063892353347	0.9926294918811284	0.9999999999997462	1	0.001711189092855503	0.8292318818624842	0.9999995579419264	1
ENSG00000076685	NT5C2	338.142784589988	0.132182920604326	0.0374945183632211	0.17096553194859176	0.9999997284004437	1	1	1.1825364821527184e-4	0.2850296330168982	0.9951314960356963	0.9999999968165701
ENSG00000076864	RAP1GAP	1867.09609573523	0.456827060583061	0.336548720752389	0.9999837528266577	1	1	1	0.9949481735959843	1	1	1
ENSG00000076924	XAB2	141.487655308869	0.0599146283872331	0.00468969590039626	0.0021281337073547624	0.8622380202121961	0.999999855708834	1	7.033950977231029e-9	2.3126583910126897e-6	2.4357870575053564e-4	0.008391167993169857
ENSG00000076944	STXBP2	52.5073781097487	0.0231054819075764	0.0075441754604718	7.087406711181465e-6	0.028152277666785075	0.7071606231269827	0.9987830890622328	3.7280304399089914e-8	3.2398972680591775e-5	0.004587167236081102	0.1130585572235987
ENSG00000077044	DGKD	67.2580048489493	0.0294055173077822	0.0183204174875167	2.7854033140650714e-5	0.09985753328506808	0.9327125271881956	0.9999922747391591	2.044789712440931e-6	0.007281637818424946	0.39575639614900915	0.9736390816174847
ENSG00000077097	TOP2B	27.2771856590268	0.0121378821593953	0.00988212034037208	2.746098035633082e-7	5.780924810921961e-4	0.06908668332447221	0.6165431013713163	1.1105406860778544e-7	1.6305238163882851e-4	0.022667258944756852	0.34438765768302615
ENSG00000077157	PPP1R12B	26.5741313360489	0.011828735569142	-1.26404002236855e-16	2.4424933087185963e-7	4.92735466357419e-4	0.06047926916683255	0.5811527163261696	NaN	NaN	NaN	NaN
ENSG00000077232	DNAJC10	57.0564880174154	0.0250571245455106	0.0252341586985118	1.1137761668611468e-5	0.043951125838119	0.8028199049820967	0.9997164960574527	1.1588309825838472e-5	0.04564570628130349	0.8102927249675256	0.9997528799953276
ENSG00000077238	IL4R	70.5161417635051	0.0307861361366411	0.0225055994476903	3.642938258230366e-5	0.1242086344864799	0.9546111491329308	0.9999977569390311	6.13238816182804e-6	0.02427836873102096	0.6730612511236168	0.9981371665808235
ENSG00000077254	USP33	38.8751729435495	0.0172099695499734	0.0135050966183237	1.4825688509079171e-6	0.004988661301953745	0.3204775838774522	0.9520070401423899	4.507704099987464e-7	0.001120687100366724	0.11682501442142323	0.754448723006535
ENSG00000077380	DYNC1I2	26.0505459072481	0.0115983791881787	0.00220936223947071	2.235349358947758e-7	4.362932164267974e-4	0.05456654563567365	0.5540332791542137	9.015392876676742e-10	6.975814670351355e-8	3.1431978533280613e-6	8.28674526955897e-5
ENSG00000077420	APBB1IP	154.923341943039	0.0652329863482197	0.0652912395259806	0.0035916356913446856	0.9246574687598568	0.9999999927200184	1	0.0036113308494056806	0.9251846597258577	0.9999999929606908	1
ENSG00000077454	LRCH4	30.4751020096442	0.0135416303794831	0.00556357140065748	4.565644524667789e-7	0.0011396244895394148	0.11832143268060813	0.7576510528918664	1.2357739387347522e-8	5.76663619322737e-6	6.998655997354497e-4	0.022780570325561023
ENSG00000077458	FAM76B	130.843958506464	0.0556582915820544	8.02725454660611e-4	0.0013487324948918689	0.7887958048997921	0.9999986092570955	1	1.380441316811698e-10	2.3036555996114316e-9	3.160860140294375e-8	3.5623145311358684e-7
ENSG00000077463	SIRT6	33.88766898154	0.0150352075872764	0.00503900098330441	7.552048469916528e-7	0.002178240286111355	0.1890852360257449	0.8655212547886412	8.872288459471633e-9	3.378501137629719e-6	3.7913177545112475e-4	0.012848396087059566
ENSG00000077549	CAPZB	68.9601320841515	0.0301272753149098	0.0266955049959466	3.208964919787505e-5	0.11218200520941368	0.9450648879896525	0.9999959317110055	1.5948635332940775e-5	0.06143980760029355	0.8644256548985451	0.9999229288625504
ENSG00000077585	GPR137B	737.568568035927	0.249383421235686	0.23621001654377	0.894470376506695	1	1	1	0.8491674502012714	1	1	1
ENSG00000077684	JADE1	176.040212814031	0.0734713098188282	0.0317628629470291	0.007395646892094265	0.9743315476057712	0.9999999999476706	1	4.378956431072556e-5	0.14338773158391172	0.9661333008106864	0.9999990877464842
ENSG00000077782	FGFR1	2312.24115341321	0.510176108275234	0.458128978232285	0.9999991867231024	1	1	1	0.9999848531333556	1	1	1
ENSG00000077809	GTF2I	346.7989554021	0.135109512442424	0.0359325608624765	0.18785754875865113	0.9999998658949016	1	1	9.143793852439686e-5	0.24209784632471276	0.9914405397351473	0.9999999841923484
ENSG00000077984	CST7	528.585632250508	0.192311866164311	0.115253695684902	0.6031390241856436	0.9999999999999781	1	1	0.0904112321680659	0.9999870407709742	1	1
ENSG00000078043	PIAS2	223.025367658285	0.0912906474942016	0.0631919715037251	0.02627236674995248	0.9985105766154955	0.9999999999999996	1	0.0029549724154601664	0.9041761339068551	0.9999999766436184	1
ENSG00000078070	MCCC1	151.741231405571	0.0639788309939883	0.0446018257286569	0.0031884340181200788	0.9125477411398182	0.9999999850566584	1	3.4209326586842614e-4	0.4999194798710128	0.9997233028078653	0.9999999999986963
ENSG00000078081	LAMP3	53.6604997503739	0.0236009288793403	0.0180952096951081	7.970431883275175e-6	0.03168436686801401	0.7337157623687791	0.9991506797077913	1.917900651848825e-6	0.006759113511999426	0.38024898413030295	0.9701200202504473
ENSG00000078124	ACER3	77.1268806833995	0.0335753681400716	0.0275795293500333	6.08763653295874e-5	0.18311190858997328	0.9809160736833876	0.9999998368748999	1.922102876839027e-5	0.0726303155741036	0.8909467922530655	0.9999628979696937
ENSG00000078140	UBE2K	95.0260064608234	0.0410474898319167	0.0283646316134527	2.0531887501751278e-4	0.390438704991087	0.9987687824091911	0.9999999999287748	2.259741217847111e-5	0.08364794556489552	0.9109117047900391	0.9999809218603604
ENSG00000078142	PIK3C3	127.671417260066	0.0543821491889481	0.0543821491889481	0.001168055579229832	0.7623271329723842	0.9999973192405176	1	0.001168055579229832	0.7623271329723842	0.9999973192405176	1
ENSG00000078177	N4BP2	54.9799799827543	0.024167236840111	0.0144564688555031	9.094652870911268e-6	0.03611028895787549	0.7622006926114304	0.9994417822832254	6.24037809204836e-7	0.0017088684355813788	0.1594960594824354	0.8290140327300369
ENSG00000078237	C12orf5	184.022052421763	0.0765475725301201	0.0299760134716246	0.009452623861632814	0.9835232276663788	0.9999999999924143	1	3.115876946813145e-5	0.10952538009475055	0.9426480104925639	0.9999953420565547
ENSG00000078246	TULP3	27.4538651585951	0.0122155411437813	0.0124882104737795	2.8272415986130284e-7	6.013945357439265e-4	0.07137240251618471	0.6252277552651964	3.1285964707805647e-7	6.895897618702795e-4	0.07979744775936204	0.6549930379550575
ENSG00000078269	SYNJ2	1716.58882147685	0.436059974593144	0.435440988327266	0.999951317612	1	1	1	0.9999497302646715	1	1	1
ENSG00000078403	MLLT10	31.4575950914569	0.0139721019663171	0.0134869479798164	5.297968028727951e-7	0.0013836703125873484	0.1368159332065122	0.793348285002426	4.479156560099895e-7	0.0011113780090954428	0.11608592806393359	0.7528479571603982
ENSG00000078487	ZCWPW1	251.968030519551	0.101930133160579	0.00475763711280855	0.04810089363337322	0.99979647991361	1	1	7.364652665486915e-9	2.4934865837655806e-6	2.660865007071411e-4	0.009143897822611824
ENSG00000078618	NRD1	222.357951153502	0.0910423269645977	0.0399822851287591	0.02587261212968739	0.9984435187113918	0.9999999999999996	1	1.748184400994779e-4	0.3580287513464201	0.9981167435475532	0.99999999977258
ENSG00000078674	PCM1	196.116331460993	0.0811700698792117	0.0657019734254271	0.013367571372058018	0.9918628801093828	0.999999999999617	1	0.0037527165613115976	0.9288161664291498	0.9999999944492418	1
ENSG00000078699	CBFA2T2	24.0546968048958	0.0107193005763831	4.37279258084588e-4	1.5764550220787044e-7	2.683284754587678e-4	0.03571198742095538	0.44682545613824665	6.439704325345019e-11	5.399748426171413e-10	4.104495521239926e-9	2.8019600195605676e-8
ENSG00000078747	ITCH	50.3737149008916	0.0221874110725822	0.00450309061645319	5.672544118318079e-6	0.02239404163829528	0.6541589355091919	0.9976753910391427	6.187336865082216e-9	1.8729617583534974e-6	1.899158153002567e-4	0.0065746349642484825
ENSG00000078804	TP53INP2	35.1592257824956	0.0155905735526484	2.34526569680133e-6	9.02686327908242e-7	0.002724196359480735	0.21985478706353412	0.8946660955168932	1.3698819856244882e-11	1.4267476089457887e-11	1.5231260697134985e-11	1.6614709608120393e-11
ENSG00000078808	SDF4	21.8470582665381	0.00974511538866122	0.00161913693520552	1.046775048862969e-7	1.4975147731155491e-4	0.020933367091204413	0.328082726344052	4.6105896878145813e-10	2.10903342567903e-8	6.485794120658639e-7	1.3444961292186086e-5
ENSG00000078814	MYH7B	465.505865055535	0.173340103670155	0.00763035574603424	0.46096550389614466	0.9999999999944551	1	1	3.894757583111641e-8	3.462865386572034e-5	0.004915645672712965	0.11928785921703755
ENSG00000079246	XRCC5	57.246904959544	0.025138646509901	0.0183742858788721	1.1343318032319694e-5	0.0447257742289513	0.8062860509836649	0.9997338443002375	2.0761915441314116e-6	0.007411287569029534	0.399477474862881	0.9744246252739269
ENSG00000079257	LXN	322.378143902872	0.126801807463614	0.0564347745455608	0.1421145250855238	0.9999990331881894	1	1	0.0014696556403273053	0.8038872883066506	0.9999990720663819	1
ENSG00000079263	SP140	176.974779986716	0.0738325582164434	0.0728178793230852	0.007616770108806126	0.9756063278949374	0.9999999999581892	1	0.0070087277623160915	0.9718757328169781	0.9999999999216004	1
ENSG00000079277	MKNK1	1353.7072469774	0.378796346041593	0.0259784083867267	0.9991954938852602	1	1	1	1.365895973914899e-5	0.05327953164681465	0.8395230670098048	0.9998625340883819
ENSG00000079308	TNS1	233.958547948128	0.0953392420355886	0.0949366563372818	0.033460873713557215	0.9992850518945399	1	1	0.03268764101391186	0.999229903725757	1	1
ENSG00000079332	SAR1A	29.1117662826373	0.012943672572908	0.00269398793887533	3.6933377434156256e-7	8.611631174608725e-4	0.09527992003539987	0.7019269362293183	1.4550218807585225e-9	1.613225361074555e-7	9.261132849491815e-6	2.771702274290133e-4
ENSG00000079335	CDC14A	327.630500940264	0.128602048381562	0.12449512291055401	0.15143978434247618	0.9999993651851936	1	1	0.13065741470141223	0.9999983527479842	1	1
ENSG00000079337	RAPGEF3	2204.85931561157	0.498289133810988	0.200403657510141	0.9999983816665237	1	1	1	0.6589420698434043	0.9999999999999981	1	1
ENSG00000079435	LIPE	34.8646247715993	0.0154619591742147	0.00900565959991032	8.66496966178687e-7	0.00258869863156741	0.21253350941546711	0.8884036772684413	7.53530111641254e-8	9.282822710543481e-5	0.013252930765527027	0.24449819522853322
ENSG00000079459	FDFT1	968.678255801173	0.303786766205983	0.138182323461822	0.9820026354076439	1	1	1	0.20645436471738488	0.9999999367872301	1	1
ENSG00000079462	PAFAH1B3	12.3471340522429	0.00553100987919825	2.07483844905138e-4	1.2112923997165126e-8	5.5846070521337055e-6	6.748512682128727e-4	0.022032361100713382	3.3429814472185626e-11	1.4494527800223977e-10	6.199990520983079e-10	2.523726894132494e-9
ENSG00000079691	LRRC16A	2407.09196936797	0.520217014337141	0.513549128884268	0.999999549224132	1	1	1	0.9999993323677974	1	1	1
ENSG00000079739	PGM1	204.479693004179	0.0843396187619981	0.0697906931697155	0.01671161374646668	0.9951130444799416	0.9999999999999533	1	0.005422155790340222	0.9576155368039995	0.9999999995040317	1
ENSG00000079785	DDX1	113.715936709778	0.0487274114732668	0.0483501122836916	5.911906578098813e-4	0.6214711520300447	0.9999572210743083	0.99999999999999	5.633945542080632e-4	0.6108657871599615	0.999948969580271	0.9999999999999842
ENSG00000079819	EPB41L2	145.231237157955	0.0614025533217903	0.0559509803109049	0.0024759466070938263	0.8827506994504628	0.9999999363715918	1	0.0013932998680465936	0.7945745201881633	0.9999988054338496	1
ENSG00000079950	STX7	126.86323862179	0.0540565110629502	0.0530832955119885	0.0011253437510498898	0.7552428348248746	0.9999968361449582	1	0.001005401049875898	0.7332805317920421	0.9999948313152225	1
ENSG00000079974	RABL2B	360.532072876805	0.139712300678705	0.116584488437338	0.2160275041034012	0.9999999567133404	1	1	0.09564558852808003	0.9999903001282958	1	1
ENSG00000079999	KEAP1	84.0971957237502	0.0364989792443778	0.0288389781707636	1.0048566578069185e-4	0.2573522068297397	0.9930037600889365	0.9999999911150041	2.4875736474361254e-5	0.09080660372844218	0.9214695748011114	0.9999873248040404
ENSG00000080189	SLC35C2	65.2916891874768	0.028570396285251	0.0298874677585627	2.3562580591440785e-5	0.08670650835232319	0.915624806992736	0.9999840124156446	3.0624722883954014e-5	0.10798838241749975	0.9411920772932647	0.9999949591636885
ENSG00000080200	CRYBG3	199.406572469189	0.0824196208848352	0.02327911867448	0.014617137161887173	0.9933281108224092	0.9999999999998319	1	7.386731161629356e-6	0.029355019394881166	0.716637223298475	0.9989263243233353
ENSG00000080298	RFX3	15.3580979389232	0.00687053137172246	0.00729226162269643	2.6188264889981383e-8	1.883419577897172e-5	0.002585333973096793	0.07133482346531117	3.274569526645621e-8	2.6575532973582838e-5	0.0037277435209451815	0.09601320039226846
ENSG00000080345	RIF1	45.207685263812	0.0199574129815593	0.00160058326467987	3.2051048289849504e-6	0.012121410178384195	0.5091514703342419	0.9899682176572923	4.5052450658999987e-10	2.022946221647004e-8	6.134365703180933e-7	1.2595399487946857e-5
ENSG00000080546	SESN1	310.15666974838	0.122583978081968	0.0577930401374704	0.12158870484311368	0.999997452105745	1	1	0.0017028711815409991	0.8284489748805834	0.9999995470947467	1
ENSG00000080573	COL5A3	3413.49207942035	0.605928264617633	0.598534430012682	0.999999997849259	1	1	1	0.9999999965186135	1	1	1
ENSG00000080608	KIAA0020	42.1151126925804	0.018617581597097	0.0185025202285169	2.2232547474132502e-6	0.00802001551443876	0.4163267456542039	0.9777206640366018	2.1526222582224364e-6	0.007727350581928971	0.40835043043525543	0.9762119995530865
ENSG00000080815	PSEN1	924.384973873778	0.293979579966942	0.0870458292677241	0.9744165357986121	1	1	1	0.0200474640849585	0.9968883834966067	0.9999999999999925	1
ENSG00000080819	CPOX	16.0123172548743	0.00716110422617546	0.00739577119782124	3.0573966580682566e-8	2.3918372314524206e-5	0.0033352997972733167	0.0878242816480217	3.4549468841404973e-8	2.8848591167363047e-5	0.004063389677579021	0.10280703877356112
ENSG00000080822	CLDND1	24.2487532118697	0.0108048420110141	0.0115597004827423	1.6322564788673333e-7	2.817738610572107e-4	0.03730135164014614	0.4573948441898439	2.202083370095309e-7	4.273754175651012e-4	0.05361483103983333	0.5494256470895122
ENSG00000080823	MOK	63.1979378085259	0.0276795702913016	0.0138161697760941	1.96254506047433e-5	0.0739771812064588	0.8936718404033286	0.9999658849805153	5.021851785524944e-7	0.001290677522880035	0.12993364488769266	0.780852517787461
ENSG00000080824	HSP90AA1	40.8310548085752	0.0180601972543377	0.00521970187125	1.8987966968753156e-6	0.006680650405458399	0.377846274419978	0.9695374206223392	9.967235148344855e-9	4.0798132500130535e-6	4.7137713128697634e-4	0.01578570326004558
ENSG00000080839	RBL1	27.0911369939612	0.0120560917837103	0.00423030507416517	2.6627982663285366e-7	5.543795728659706e-4	0.06673333802099635	0.6073034849344846	5.10020004007572e-9	1.3603977391252187e-6	1.297593523121865e-4	0.004500272867161925
ENSG00000080854	IGSF9B	344.132052256818	0.134209956914633	0.133293420066147	0.18257832208070313	0.9999998332236771	1	1	0.1772784658998	0.9999997919487753	1	1
ENSG00000080986	NDC80	41.5354382222724	0.0183660346507425	0.0140264187572599	2.0713548058992615e-6	0.007391309853591377	0.3989072445079247	0.9743056570602227	5.397159411613117e-7	0.001417346538587605	0.13926169081967876	0.7975846878622447
ENSG00000081014	AP4E1	317.781670839877	0.125220256136024	0.116278914048093	0.13419909994338963	0.9999986057592477	1	1	0.09442701856185354	0.9999896306319354	1	1
ENSG00000081019	RSBN1	25.5488338820657	0.0113775454341366	0.00741067258658516	2.051037328865135e-7	3.87424235455458e-4	0.04928868991020019	0.527545553850229	3.4815865301851545e-8	2.918923206796098e-5	0.004113673941280149	0.10380920223046619
ENSG00000081026	MAGI3	49.519309280055	0.0218192941023109	0.0107399291414031	5.177969914171854e-6	0.020354581482891154	0.6316350768091801	0.9970081855061753	1.5897608163228938e-7	2.7151983891227083e-4	0.036090659716364826	0.44937484915781234
ENSG00000081177	EXD2	30.6377081195714	0.0136129009165005	0.0133248742359552	4.6805153219864337e-7	0.0011773386198710156	0.12127376301233783	0.7638208310883841	4.2310131820322283e-7	0.001031075659741143	0.10961176087309243	0.7382609520738209
ENSG00000081320	STK17B	66.2152841974595	0.028962838563431	0.0222056662812454	2.5502266174148858e-5	0.0927386797246974	0.924051002383339	0.9999886181523033	5.698096576689515e-6	0.022499058751403345	0.6552579693255085	0.9977045474754869
ENSG00000081665	ZNF506	233.238693178291	0.095073787082707	0.0447367897143492	0.0329495318006765	0.9992491262162795	1	1	3.4852888442571395e-4	0.5040444513182503	0.9997391195627767	0.9999999999988841
ENSG00000081721	DUSP12	27.2435713400538	0.0121231056960186	0.0076975013366323	2.730886189405979e-7	5.737461838611901e-4	0.06865743406117553	0.6148807959516551	4.028955569168602e-8	3.645628977999582e-5	0.005184561868351478	0.12428144143882636
ENSG00000081760	AACS	258.952380597816	0.104460409415113	0.0737354461808128	0.054773116740426175	0.9998767658311053	1	1	0.007556814946939938	0.9752692608178817	0.9999999999555865	1
ENSG00000081791	KIAA0141	231.805730717783	0.0945449012593344	0.0728331213353866	0.03194791096421978	0.9991723876919071	1	1	0.007017564551685451	0.9719352926372861	0.9999999999223343	1
ENSG00000081870	HSPB11	74.8557806234052	0.032618947672202	0.00790167915647498	5.1259203533882136e-5	0.16149687434890825	0.9740462310983002	0.9999995920716754	4.461127023347444e-8	4.25334733490379e-5	0.006076170835119465	0.14021443842510484
ENSG00000081913	PHLPP1	381.740256066322	0.146724968096351	0.146884272915531	0.2623397382482243	0.9999999926275067	1	1	0.2634344995909742	0.9999999929226343	1	1
ENSG00000081985	IL12RB2	453.903499157101	0.169753134060442	0.155686083093728	0.4332640048116351	0.999999999984771	1	1	0.32634123860026987	0.9999999992904326	1	1
ENSG00000082014	SMARCD3	24.3638857381879	0.0108555862500766	0.00468089007911771	1.666146618450881e-7	2.900174377097331e-4	0.03826814804551071	0.4636603182331781	6.991989764948414e-9	2.2900710990869655e-6	2.4078387620618535e-4	0.00829732881900791
ENSG00000082068	WDR70	15.3770644133834	0.00687895776429947	0.00473927611880943	2.6307594325203354e-8	1.896728811823234e-5	0.0026049309230467	0.07178134617031473	7.274057245432175e-9	2.443455381584414e-6	2.598360218246665e-4	0.008935392389418872
ENSG00000082146	STRADB	32.4042965875336	0.0143865364830937	0.00838047179207375	6.096021999413281e-7	0.0016583342299592019	0.1561016119278772	0.824157048679579	5.629712840349299e-8	6.030039486193406e-5	0.008654719637052222	0.18186585821187684
ENSG00000082153	BZW1	38.0661491266459	0.0168578538504591	0.011493776713186	1.334780066253316e-6	0.004398473863161834	0.29745481833257315	0.9425422484833554	2.14635845652289e-7	4.125318081409368e-4	0.05201959291066249	0.541540155499455
ENSG00000082196	C1QTNF3	78.5668803797065	0.0341808111177204	0.0342619607205355	6.773388774994338e-5	0.1975169414447311	0.9843762779427326	0.999999909527528	6.870159298388856e-5	0.19948870742227742	0.9847944276475884	0.9999999164453347
ENSG00000082212	ME2	239.707803244249	0.0974537719187964	0.0958028877241188	0.037744085033464714	0.9995183399966001	1	1	0.034367927953952826	0.999343922893723	1	1
ENSG00000082213	C5orf22	191.67874380528	0.0794793851783256	0.0770234622922529	0.011811275065295113	0.989410885739995	0.9999999999988454	1	0.009807729100628437	0.984644570418456	0.9999999999943963	1
ENSG00000082258	CCNT2	15.7950566243055	0.00706462632946042	0.00349970084761886	2.9054536332395742e-8	2.2113080048513645e-5	0.0030687668308655436	0.08209835023269285	2.9238498289174686e-9	5.34653192385548e-7	4.167194368875915e-5	0.0014001407687479483
ENSG00000082397	EPB41L3	233.283808853447	0.095090428596793	0.0934289633656033	0.032981418242737814	0.9992514277797662	1	1	0.02990842237913871	0.9989854358055166	0.9999999999999999	1
ENSG00000082438	COBLL1	12.1035344129774	0.00542247894256416	0.00553939027525597	1.1325586135590981e-8	5.01322544776972e-6	5.968440235266659e-4	0.019672476234651737	1.2175547015047528e-8	5.630975216441847e-6	6.812160875798723e-4	0.02222312312189434
ENSG00000082512	TRAF5	122.414967108827	0.0522601540835954	0.0515234314473586	9.124965847530087e-4	0.7137973858118265	0.9999922120513273	0.9999999999999999	8.355618538359311e-4	0.6956750023738308	0.9999888057642341	0.9999999999999997
ENSG00000082641	NFE2L1	78.0769656668188	0.0339749133006795	0.0115371814770541	6.533094489680202e-5	0.19255712922917223	0.9832685479877783	0.999999889357396	2.182911007508892e-7	4.222549038910284e-4	0.0530661137918077	0.5467365086557372
ENSG00000082701	GSK3B	172.20461529758	0.0719857382584969	0.0671494435246389	0.006539635402376565	0.968450829190659	0.9999999998692152	1	0.004287432829082283	0.9404693584182022	0.9999999976148719	1
ENSG00000082781	ITGB5	45.8367909073261	0.0202295201010357	0.0184719706519745	3.4447125204506435e-6	0.013125991103961732	0.5277340576998426	0.9915338364648058	2.1341972810118293e-6	0.007651095782279738	0.40623486625919836	0.9757965310599503
ENSG00000082805	ERC1	55.8728361745501	0.0245500694443303	0.0249815214051431	9.929972072386661e-6	0.03934731804290292	0.7802999503037562	0.9995818083951995	1.0950011795518577e-5	0.04324134187156925	0.7995672091042094	0.9996994463195108
ENSG00000082996	RNF13	400.686832185896	0.15289382434592	0.13631694249157	0.305916502490275	0.9999999985148582	1	1	0.19506236016583434	0.9999999000735337	1	1
ENSG00000083097	DOPEY1	666.260073705847	0.230838544237767	0.148185214520896	0.8270076332842361	1	1	1	0.2724392537573562	0.9999999949356613	1	1
ENSG00000083099	LYRM2	56.6415627617449	0.0248794380671124	0.0196812986856471	1.0700841483801682e-5	0.04229603946475535	0.7951168470266108	0.9996748661700935	2.976810406840613e-6	0.011164626326999771	0.49014947999143466	0.9881141299152475
ENSG00000083123	BCKDHB	84.5040813327679	0.0366690959748253	0.0376205240342123	1.0334853585081127e-4	0.26200621145460645	0.9934192775574988	0.9999999925351158	1.2068349078964147e-4	0.28860504319688407	0.9953532606575446	0.9999999972078464
ENSG00000083168	KAT6A	106.184498372307	0.0456474963385782	0.0340837570651431	3.9470103271033175e-4	0.5316903083845853	0.9998253346569569	0.9999999999996122	6.659191997637759e-5	0.19517130080509304	0.9838626146098024	0.9999999005142248
ENSG00000083223	ZCCHC6	53.6281942207039	0.0235870554196242	0.0186090999686129	7.944470859722053e-6	0.03158121974267658	0.732992660385949	0.9991420005906435	2.2179807805944307e-6	0.007998144980588484	0.4157383770535569	0.9776124266208988
ENSG00000083290	ULK2	139.313502571867	0.0590483216494979	0.0427133423641838	0.001944963498839325	0.8491018633375592	0.9999997690266691	1	2.620855034042302e-4	0.4417623548331927	0.9993797782435576	0.9999999999888148
ENSG00000083312	TNPO1	24.1591793786643	0.0107653590710768	0.0139118495136628	1.6062950547457433e-7	2.754984052515397e-4	0.03656148946162485	0.4525172268085442	5.189771020708278e-7	0.0013470969779175723	0.13413211537369885	0.7885786223619912
ENSG00000083444	PLOD1	1900.77060313702	0.461265813168541	0.0267884760019623	0.9999872158796973	1	1	1	1.6268442757594315e-5	0.06255723802236002	0.8674271433272597	0.9999285673441427
ENSG00000083457	ITGAE	58.7728380793701	0.0257914422610487	0.0230093304138253	1.311088388844528e-5	0.05128313456873135	0.8325092659004989	0.9998404947583908	6.926206820190295e-6	0.02750225611500945	0.7018354800730804	0.9986962036031645
ENSG00000083520	DIS3	43.7073872956196	0.019307878545131	0.0184762876850433	2.690464447341334e-6	0.009966250978001412	0.46428919993232187	0.9851128631136159	2.1367926772430934e-6	0.007661834935221656	0.40653375983272266	0.9758556288831204
ENSG00000083544	TDRD3	20.4672630874446	0.00913526540853802	0.00913526540853802	7.991842687626871e-8	1.0118745772680349e-4	0.014408981938205945	0.2585004500801853	7.991842687626871e-8	1.0118745772680349e-4	0.014408981938205945	0.2585004500801853
ENSG00000083635	NUFIP1	18.6197413460586	0.00831750966998208	0.0086101790956143991	5.462724150806508e-8	5.765059947993034e-5	0.008273053389325269	0.17605682594055494	6.275934627542057e-8	7.087522503745891e-5	0.010167267860164753	0.2038655486902513
ENSG00000083720	OXCT1	26.4842066470793	0.0117891799856486	0.0116109068271722	2.405801384774975e-7	4.8262652040975684e-4	0.059433910667909706	0.5765377021384362	2.24621541478065e-7	4.3921517794143217e-4	0.05487730706647265	0.5555225242239505
ENSG00000083799	CYLD	62.6862020670577	0.0274615941561714	4.37789745204865e-4	1.8753519735237312e-5	0.07106374576636454	0.887664047702161	0.9999590518025958	6.447764544503798e-11	5.412883474775754e-10	4.11870737515585e-9	2.8141973751338867e-8
ENSG00000083812	ZNF324	22.2329112823854	0.00991552267853828	1.25579540589133e-4	1.1265771215906994e-7	1.6644405810206653e-4	0.02310599404755176	0.34839168455480507	2.4740098858444526e-11	7.513123456703852e-11	2.36700659073108e-10	7.273047719635883e-10
ENSG00000083814	ZNF671	42.4426096863036	0.0187596403571043	0.00540713801546344	2.3132101792944226e-6	0.008393460967181188	0.4261888880090263	0.9794657070267915	1.1217776041405614e-8	4.936683519640717e-6	5.864578439408463e-4	0.01935512234151393
ENSG00000083828	ZNF586	425.984667031809	0.160992870570814	0.020016371758134	0.3660735727360307	0.9999999998295123	1	1	3.255762896392511e-6	0.012333792131996035	0.5131912666429148	0.9903282783419596
ENSG00000083838	ZNF446	72.6388515450615	0.0316835124276589	0.00362343553686755	4.314731153820528e-5	0.141770069275152	0.9653029314388641	0.9999990178388067	3.227064282462777e-9	6.318510654690357e-7	5.118437078177607e-5	0.0017363208947167585
ENSG00000083844	ZNF264	126.725251615269	0.0540008897624649	0.0381016558338223	0.0011181805758490038	0.7540194545698858	0.9999967455617199	1	1.3035890797619132e-4	0.30239329245672175	0.9961167669512643	0.9999999983120036
ENSG00000083845	RPS5	476.634760341745	0.176751693388889	0.115155654143932	0.48723339287810485	0.9999999999979023	1	1	0.09003305306796228	0.9999867625493243	1	1
ENSG00000083937	CHMP2B	191.216081397621	0.0793027563447511	0.0764382448930215	0.011657261948067599	0.9891192879263802	0.9999999999987053	1	0.009372500813588203	0.9832554524881877	0.999999999991869	1
ENSG00000084072	PPIE	4840.04326559571	0.685554334940371	0.666940160136736	0.999999999990378	1	1	1	0.999999999964702	1	1	1
ENSG00000084073	ZMPSTE24	20.9090552235674	0.00933061302725709	0.00469529406343656	8.724083244704417e-8	1.1500333932012996e-4	0.01629764920216137	0.28017230435455165	7.060733775432482e-9	2.3271175987327197e-6	2.453698039717178e-4	0.008451262392867975
ENSG00000084090	STARD7	72.9418406804361	0.0318114656840971	1.57763932785602e-4	4.418699781305602e-5	0.14438371011116025	0.9666333122169063	0.9999991281411638	2.8019697673187238e-11	9.926526267634017e-11	3.567997008957491e-10	1.237777547125063e-9
ENSG00000084092	NOA1	112.5785936585	0.0482635800416601	0.0144381321187345	5.57177674070708e-4	0.6084158285916875	0.999946871285686	0.9999999999999826	6.202245963482511e-7	0.0016954959602042408	0.1586021522879386	0.8277499607726063
ENSG00000084110	HAL	699.167070391812	0.239509097469358	0.183492848417773	0.8616900482288588	1	1	1	0.5384827003191159	0.9999999999997021	1	1
ENSG00000084112	SSH1	418.94327232792	0.158754178887049	0.0922065224521109	0.3491857089207626	0.9999999996877724	1	1	0.027786827754124332	0.9987351241294944	0.9999999999999998	1
ENSG00000084444	KIAA1467	97.2399226181121	0.041963683461938	0.0312041523451091	2.3507583423032496e-4	0.4186126257752426	0.9991529449650338	0.9999999999741326	3.94371746326172e-5	0.1322207979562836	0.9599004044506452	0.9999984700087449
ENSG00000084463	WBP11	22.1330637745152	0.00987143186642782	0.00428899093462525	1.1054502579987968e-7	1.6197962414521427e-4	0.02252820694988511	0.3431086693266109	5.319890972188546e-9	1.4590262235048002e-6	1.4109333441814087e-4	0.004894195308100313
ENSG00000084652	TXLNA	20.6813069797824	0.00922991900515241	0.00971110360043688	8.33985983605956e-8	1.0769272455979362e-4	0.015301637707295646	0.26891982318527863	1.0314356457818974e-7	1.4659716500531328e-4	0.02051899063871776	0.3240668058288011
ENSG00000084676	NCOA1	74.3946079625169	0.0324245043569821	0.0292788830942874	4.947289716672465e-5	0.157279214153482	0.9724080890851491	0.999999509609565	2.7162937020541733e-5	0.09778695801344928	0.9303228854642112	0.9999913651490903
ENSG00000084693	AGBL5	16.1252622922805	0.00721125178638264	0.00435448250517233	3.138962267890122e-8	2.4905922912488165e-5	0.0034811480529157723	0.09090004485713898	5.574035566446867e-9	1.5763084615372236e-6	1.5473143655186927e-4	0.005366305504478364
ENSG00000084731	KIF3C	46.6379895848064	0.0205758439588094	0.0139086922574051	3.771915641936907e-6	0.014497204290419119	0.551120303733664	0.9932028083811215	5.184154119319828e-7	0.0013452029698730605	0.13399233114090703	0.7883266503370575
ENSG00000084733	RAB10	18.8642321646212	0.00842580442958905	0.00699348055012783	5.752590648278044e-8	6.227245595891162e-5	0.008938080561203487	0.18610822524618642	2.797495013417972e-8	2.0858254414668487e-5	0.002883623945383107	0.07803636659031299
ENSG00000084754	HADHA	27.1455612521235	0.0120800190785139	0.00285092684389995	2.68694053562335e-7	5.612300257841207e-4	0.06741608696583024	0.6100161220569027	1.681110028961541e-9	2.0721714821814174e-7	1.2732375013424502e-5	3.929594783546042e-4
ENSG00000084764	MAPRE3	62.0416550184069	0.0271869073388612	0.00880293387534893	1.7702491045823443e-5	0.06750347970086201	0.8797181475935354	0.9999485438077249	6.86546736128335e-8	8.094126289315273e-5	0.011591176415990945	0.2232561496796761
ENSG00000084774	CAD	76.6199963610958	0.0333620696861027	5.907300625724e-4	5.86070428986174e-5	0.17816828342189706	0.9795428389667756	0.9999997995641693	9.127520961271784e-11	1.0553733442719704e-9	1.0598358524127605e-8	9.20579805718802e-8
ENSG00000085063	CD59	1196.831569017	0.350275260820456	0.341642089412499	0.9971530822357647	1	1	1	0.9959053859490012	1	1	1
ENSG00000085117	CD82	71.3129745552377	0.0311231923997987	0.0320584191641232	3.8838499866855614e-5	0.13064601067424897	0.9589196272433658	0.9999983518581306	4.625470594454839e-5	0.1495045220603206	0.9690756538955223	0.9999993078855172
ENSG00000085231	TAF9	106.410063509989	0.0457400288878744	0.00710160491505266	3.996697509291991e-4	0.5344780465108425	0.9998323762580046	0.999999999999652	2.9629269371334033e-8	2.279061652832315e-5	0.0031687799456410204	0.08426331598992931
ENSG00000085265	FCN1	1621.57803457255	0.422112480855275	0.421352843965523	0.9999005862222209	1	1	1	0.9998967009224321	1	1	1
ENSG00000085365	SCAMP1	29.1496162908713	0.0129602833354157	0.0109691697641127	3.715481931010345e-7	8.680421933321414e-4	0.09587825113004977	0.703567945118478	1.7441831701159316e-7	3.092157724705613e-4	0.0404978385159932	0.4776637605765601
ENSG00000085377	PREP	11.9379907717112	0.00534871077111936	0.00559307549387579	1.0814869777497904e-8	4.654329811115687e-6	5.482865416559513e-4	0.01818215182025751	1.258307502638445e-8	5.9359749096099534e-6	7.232010931879085e-4	0.02347497363341411
ENSG00000085382	HACE1	48.5618663898832	0.0214064545073055	0.0205818111138194	4.668021297171698e-6	0.018239109598741976	0.6056033603796231	0.9960495407449863	3.777780482216997e-6	0.01452176757675705	0.5515202656870049	0.9932287118582894
ENSG00000085415	SEH1L	29.9391561938904	0.0133066514760946	0.00663870743059743	4.2038649394893213e-7	0.0010223589578074455	0.10889803942182164	0.736588262294325	2.3077816879712998e-8	1.547504955623502e-5	0.0020919156242270587	0.05977520212748766
ENSG00000085449	WDFY1	105.251949072452	0.0452647503916458	0.00164160347189692	3.747012040696829e-4	0.5201151315637678	0.9997930810740229	0.9999999999993945	4.740535741731833e-10	2.21733414962344e-8	6.934364308319729e-7	1.453951899410555e-5
ENSG00000085465	OVGP1	649.644815982803	0.226385095592505	0.132430645094567	0.806929833879489	1	1	1	0.17236339590511196	0.9999997440450682	1	1
ENSG00000085491	SLC25A24	626.095434397001	0.219983991692693	0.215676372350364	0.7753172034080115	1	1	1	0.7522133041475187	1	1	1
ENSG00000085644	ZNF213	53.3323600769246	0.0234599924821903	0.0181980495108847	7.71007801581014e-6	0.03064802267437927	0.726314544158415	0.9990585108348424	1.9749748894071217e-6	0.006993858804458464	0.38731967534151	0.9717751290302208
ENSG00000085662	AKR1B1	242.744933632507	0.0985668188034651	0.091437390521462	0.04015230230459832	0.9996099754040937	1	1	0.026510761890881862	0.9985489159793334	0.9999999999999997	1
ENSG00000085719	CPNE3	21.1001937216023	0.00941510503667534	0.00927113036279139	9.057949257318398e-8	1.214616872627916e-4	0.01717137670540081	0.28974026417526855	8.49534280700226e-8	1.1063510954556488e-4	0.01570341538770048	0.27350478377739273
ENSG00000085721	RRN3	117.317616031927	0.0501932707935079	7.31040827147521e-6	7.104304848213339e-4	0.661393594931633	0.999978662400144	0.9999999999999983	1.4099388323529638e-11	1.5911716388927744e-11	1.9091950242966504e-11	2.3891333356118594e-11
ENSG00000085733	CTTN	25.6039668595138	0.0114018176122663	0.00798271191457343	2.0706386927304976e-7	3.925574151558697e-4	0.04985042306017606	0.5304770747704557	4.643114781544e-8	4.517640845591586e-5	0.006462529830101649	0.14684667346562041
ENSG00000085760	MTIF2	76.4545435747265	0.0332924262701561	0.0318113554752943	5.7882021252564364e-5	0.17656925948747249	0.9790757706965588	0.9999997856620688	4.4186093115738956e-5	0.14438144726785063	0.9666321857399062	0.9999991280515729
ENSG00000085788	DDHD2	105.308853700837	0.0452881145372293	8.23982910835126e-4	3.7589691777450973e-4	0.5208236585821562	0.9997952032767338	0.9999999999994107	1.4341705600884325e-10	2.4742206061745264e-9	3.4908756885165815e-8	4.024600823715474e-7
ENSG00000085831	TTC39A	27.651419376637	0.0123023610949005	0.0114004471678208	2.920375694603905e-7	6.283788907477383e-4	0.07398723503210958	0.6348310162417359	2.069527729187115e-7	3.9226605971975914e-4	0.049818586998990555	0.5303116793663795
ENSG00000085832	EPS15	51.0911487266792	0.0224963004040257	0.0162240510763618	6.118506307051241e-6	0.024221660011596646	0.6725166029617644	0.9981249895916104	1.1005454572110551e-6	0.0034794838885782164	0.25749222917570247	0.9215493910439587
ENSG00000085871	MGST2	1071.40639037371	0.325516287963475	0.312030535619592	0.992126864774424	1	1	1	0.986748384332913	1	1	1
ENSG00000085872	CHERP	21.3153426509738	0.0095101935213465	0.00131335354284351	9.446570559124012e-8	1.2909905699887148e-4	0.018197307394551387	0.30063702876992104	3.0859892419243806e-10	1.0183276555331133e-8	2.434518640015426e-7	4.223687418924982e-6
ENSG00000085978	ATG16L1	84.0293757226875	0.0364706182169794	0.033897790498991	1.0001505693224555e-4	0.25657949484668385	0.9929321877605338	0.9999999908537127	6.444993120025e-5	0.1907153949859326	0.982835811828059	0.9999998807191318
ENSG00000085982	USP40	1063.18954826676	0.32382825683276	0.292525823079033	0.9915855240626715	1	1	1	0.9730789387122597	1	1	1
ENSG00000085998	POMGNT1	173.0713278463	0.072321842576276	0.0682475325624012	0.00672597122014984	0.9698758005070091	0.999999999893592	1	0.00473309487079121	0.9482019346914148	0.9999999987528724	1
ENSG00000086015	MAST2	134.716080787893	0.0572111779789676	5.48000844939673e-4	0.0015994608394340748	0.8182118566803696	0.9999993832797309	1	8.324263500725237e-11	8.85288287122421e-10	8.271834772699549e-9	6.75532852989491e-8
ENSG00000086062	B4GALT1	368.27778980140903	0.142286809882824	0.142926915401532	0.23258249023397815	0.9999999772511493	1	1	0.23678206802101243	0.9999999806367152	1	1
ENSG00000086189	DIMT1	28.4051890917762	0.0126334831593456	0.00449936346252088	3.300078971202325e-7	7.408658625538411e-4	0.08454286239761799	0.6703580366917384	6.171313460257011e-9	1.8649720134877867e-6	1.88956417622399e-4	0.0065418706656906744
ENSG00000086200	IPO11	20.5859280452991	0.00918774316469013	0.006454104674872	8.183238664472015e-8	1.0475116136676732e-4	0.014898745197471919	0.26425767646880827	2.0826847801913573e-8	1.3182983139126137e-5	0.0017571784089908116	0.051546738798357805
ENSG00000086232	EIF2AK1	49.8942536697583	0.0219808713948211	0.0074194929606218	5.39026311385804e-6	0.021231569072390766	0.641605006701521	0.9973204687226673	3.497435885346789e-8	2.939249158628865e-5	0.004143675885846965	0.10440526000666905
ENSG00000086288	NME8	585.189511570346	0.208609617694869	0.207165153775775	0.7111867431733427	0.9999999999999999	1	1	0.7023373595377135	0.9999999999999998	1	1
ENSG00000086504	MRPL28	33.9734752685996	0.0150727041118135	0.00945409051284641	7.644637708414947e-7	0.002211998619921829	0.19109184123955225	0.8676652076518627	9.215609231283395e-8	1.245447863129634e-4	0.01758647334823471	0.2941918408335378
ENSG00000086506	HBQ1	189.331549562428	0.0785826050369919	0.0564888561945608	0.011045560227610163	0.9878533495627636	0.9999999999979376	1	0.001478403570696285	0.8049098399098779	0.9999990979862686	1
ENSG00000086544	ITPKC	141.331612204505	0.0598525050331917	0.0221601133018489	0.0021145406853975146	0.8613257812910955	0.9999998507347156	1	5.634519083086431e-6	0.022237698068563794	0.6525122671299558	0.9976311449647254
ENSG00000086570	FAT2	359.436457189165	0.139346893460925	0.137711022584804	0.213722745204577	0.9999999526043438	1	1	0.20354666746940953	0.9999999290059972	1	1
ENSG00000086598	TMED2	34.3421032843598	0.0152337585472616	0.0023339436089555	8.053509898964251e-7	0.002361951866939882	0.19982974429950695	0.876578054804639	1.024919593639595e-9	8.744174928576598e-8	4.214853941308938e-6	1.1538924671194994e-4
ENSG00000086619	ERO1LB	56.7145602199131	0.0249107029975839	0.0256412935420613	1.0776629068454113e-5	0.04258396428205813	0.7964869857314972	0.9996825910899563	1.268458254211069e-5	0.049718401687770974	0.8267175448366079	0.9998203812507187
ENSG00000086730	LAT2	173.201753202983	0.0723723994315046	0.00834652986887132	0.006754364530862755	0.9700851915923869	0.999999999896848	1	5.5391654929515255e-8	5.885921956605422e-5	0.008447269141979352	0.1787222042861084
ENSG00000087008	ACOX3	490.185634479812	0.18086791850843	0.0962464516295899	0.5186657187394117	0.99999999999936	1	1	0.035252432147477974	0.9993959158427644	1	1
ENSG00000087053	MTMR2	22.5371736190924	0.0100498550856667	6.94449583952865e-5	1.1930709198360034e-7	1.8069993567415565e-4	0.02493545499512151	0.3645947871920687	1.9420798302860476e-11	4.1824654850586285e-11	9.804035361327124e-11	2.29946173213591e-10
ENSG00000087074	PPP1R15A	21.2851573496831	0.00949685374923588	0.0010730213234728	9.391214572662676e-8	1.2800345937347135e-4	0.018050614826984335	0.2991004508710998	2.168661916712722e-10	5.331683650133812e-9	1.0075120215891076e-7	1.4643932421121164e-6
ENSG00000087077	TRIP6	381.003639191369	0.146483316459265	0.0602546985058703	0.26068244041020283	0.9999999921565834	1	1	0.0022038300739568584	0.867151323675391	0.9999998801925585	1
ENSG00000087088	BAX	268.794501130145	0.10800188645872	0.0195219425267929	0.06515709398420799	0.9999399780100624	1	1	2.851551428206811e-6	0.01064008885242751	0.4791315304587733	0.9869076519386505
ENSG00000087111	PIGS	37.6452461830025	0.0166745622442894	0.0236862107034834	1.2630042860450885e-6	0.004114501392991743	0.2856881041290039	0.9370219384688749	8.131632506347408e-6	0.032323891577171415	0.7381344439663986	0.9992022324965333
ENSG00000087206	UIMC1	104.275247333744	0.0448635536833951	0.0161299073909876	3.54666813571769e-4	0.507912946046243	0.9997531856401104	0.9999999999990361	1.068971581141831e-6	0.003357488489346805	0.25174207794093617	0.9179504792590764
ENSG00000087237	CETP	29.1511448063066	0.0129609541242356	0.00553611820347711	3.7163785582272624e-7	8.683209560218508e-4	0.09590246342782571	0.7036341053548139	1.2151064598953099e-8	5.612831660117834e-6	6.787249928114081e-4	0.022148493026677873
ENSG00000087253	LPCAT2	214.340200102925	0.0880485809230209	0.0890260102920763	0.021404577937900404	0.9973772814793384	0.9999999999999962	1	0.02279347003434473	0.9977839473244003	0.9999999999999981	1
ENSG00000087258	GNAO1	276.465506927918	0.110742770593345	0.106029775917241	0.07406014489930446	0.9999660600337011	1	1	0.05922155806823781	0.9999101856893354	1	1
ENSG00000087263	OGFOD1	46.0574228082192	0.0203249142517944	0.0143160700189901	3.532295449470979e-6	0.013493147685382678	0.5342079425410533	0.9920274960674388	5.953473068975867e-7	0.00160867630783601	0.1527217673942486	0.81916375344523
ENSG00000087266	SH3BP2	118.260709129054	0.0505763573186427	0.0403528647374325	7.447318612445741e-4	0.671465717963999	0.9999822563712054	0.999999999999999	1.8495741388158127e-4	0.36924861996895086	0.9983736111756465	0.9999999998478347
ENSG00000087269	NOP14	10.0954015106218	0.00452689221446911	2.35623708634009e-4	6.290461262992153e-9	1.9246836790998145e-6	1.9614113583465986e-4	0.006786986249108562	3.668298997894226e-11	1.7587042933087105e-10	8.207723389830335e-10	3.6180908269400902e-9
ENSG00000087274	ADD1	167.755443177125	0.0702565430879769	0.0244380082200172	0.0056453775067856204	0.9601512170824529	0.999999999625461	1	9.678872070484346e-6	0.03837884863085006	0.7750994493896995	0.9995447262239464
ENSG00000087301	TXNDC16	100.432940747678	0.0432819837126244	0.0370968587738622	2.842953548281013e-4	0.4593281174801539	0.9995120034371393	0.9999999999941117	1.1085806616273342e-4	0.27384907964475624	0.9943658300428848	0.9999999951931904
ENSG00000087338	GMCL1	53.6455271429069	0.0235944990116021	0.00565118948725755	7.958390754958522e-6	0.031636530894681325	0.7333807782924944	0.9991466676216239	1.3036831503221435e-8	6.282114277000872e-6	7.710841650087064e-4	0.02488930362974562
ENSG00000087365	SF3B2	147.72173885808	0.0623898224329874	0.025566635891811	0.0027316080209508486	0.8949931991020043	0.9999999633117601	1	1.2477106834052343e-5	0.04895305074736822	0.8237846904348927	0.9998094971627903
ENSG00000087448	KLHL42	166.131080408272	0.0696236186571304	0.0696485214682313	0.005343857293496068	0.9566728953813185	0.9999999994516305	1	0.0053554695697125565	0.9568145305394752	0.9999999994597737	1
ENSG00000087460	GNAS	135.772498934801	0.0576339604083981	0.0560327258374364	0.0016740627212138426	0.8256923256939104	0.9999995071003748	1	0.0014059641506510845	0.7961689818954027	0.999998855218342	1
ENSG00000087470	DNM1L	18.0757374689886	0.00807646370780562	0.00758207296408207	4.861418911872306e-8	4.8409415407735246e-5	0.006933888741757932	0.15473554770590625	3.800594872149787e-8	3.3363736765434915e-5	0.004729347746648571	0.11577292111459625
ENSG00000087502	ERGIC2	158.676193931955	0.0667077739865312	0.067060575033899	0.0041180924745019	0.9370964054571946	0.9999999969098741	1	0.004252912567603073	0.939803166095154	0.9999999974870847	1
ENSG00000087903	RFX2	39.0693395149523	0.0172944401623993	0.0160741061411438	1.5200482184063446e-6	0.005139371284185512	0.32607464263170427	0.9540687419942853	1.050627512766411e-6	0.003286846713375202	0.24835850243297108	0.9157544936388948
ENSG00000088035	ALG6	38.6440660950473	0.0171094094351301	0.0164233458922045	1.4389911140444411e-6	0.004813931091939394	0.3138501665123494	0.9494501371057347	1.1700432390737703e-6	0.003749714145751981	0.26983126821930703	0.9287417390455102
ENSG00000088038	CNOT3	51.4934169600683	0.0226694106069573	0.00629233099242191	6.381428725221738e-6	0.025293817788563433	0.6825769730417846	0.9983398722699707	1.900732793380655e-8	1.1421514461984472e-5	0.001501599414658994	0.045019790529869375
ENSG00000088205	DDX18	187.594902296792	0.0779179678931162	0.0784555712660158	0.010503687270410289	0.986568102271631	0.9999999999968375	1	0.010940327094466573	0.9876166639777818	0.9999999999977617	1
ENSG00000088256	GNA11	1434.1579786743	0.392472899924979	0.142927011181746	0.9995752428225781	1	1	1	0.23678269882784653	0.9999999806371829	1	1
ENSG00000088280	ASAP3	81.5692667588558	0.0354407177472109	0.0102863830607241	8.415734756561655e-5	0.22916934586217108	0.9898307073907759	0.9999999740529337	1.318264718497275e-7	2.0834119605339652e-4	0.028418344700582576	0.39344341838482166
ENSG00000088298	EDEM2	413.587963898655	0.157043535119441	0.0143266221543344	0.33640128846846584	0.9999999995059476	1	1	5.974635335359579e-7	0.001616032731401762	0.1532252882186288	0.8199178419615282
ENSG00000088387	DOCK9	29.6075292552666	0.0131611976179099	0.0114669350863367	3.9924670169888543e-7	9.54969563907393e-4	0.10330411775694093	0.7230034510713474	2.1240166625524637e-7	4.066145000960475e-4	0.051379717739548636	0.538318355926686
ENSG00000088448	ANKRD10	89.6353144591811	0.0388092933538167	0.0392176286656339	1.4579215822718705e-4	0.32303227039341165	0.9970303437236842	0.9999999992005271	1.553891493832893e-4	0.3351146768729488	0.9974618946170106	0.999999999482562
ENSG00000088538	DOCK3	78.6700269975939	0.0342241496489815	0.00150113075399673	6.824923034653985e-5	0.19856879063560184	0.98460086330336	0.9999999132890703	3.9700254195196294e-10	1.6096282307032084e-8	4.5157230166292806e-7	8.786058975029931e-6
ENSG00000088543	C3orf18	29.6913863334064	0.0131979819604493	0.00167946096810172	4.0450480187637083e-7	9.716494495320971e-4	0.10470148968294213	0.726477946798872	4.965515776333973e-10	2.4102929985225785e-8	7.750620869551028e-7	1.655825753632545e-5
ENSG00000088766	CRLS1	92.4790529111509	0.0399913040486703	0.0390535433194528	1.7505943713613803e-4	0.35830100200232784	0.9981234234532165	0.9999999997747873	1.5146974053059648e-4	0.3302454463943767	0.9972960474615206	0.9999999993835065
ENSG00000088808	PPP1R13B	56.3252486025224	0.0247439370261792	0.0182970601310223	1.0377674747763521e-5	0.04106433588186187	0.7891058940167243	0.9996392645782761	2.0313016877437917e-6	0.007225988378987358	0.3941442184741485	0.9732919079737232
ENSG00000088812	ATRN	22.669410934115	0.0101082267513841	0.0102969309754324	1.222986453219832e-7	1.8721205466676327e-4	0.025763486257177615	0.37168048931302233	1.3240980878403974e-7	2.0965345513079825e-4	0.028581672371109423	0.3947373670229357
ENSG00000088826	SMOX	193.634025494012	0.080225097694494	0.0790338108620798	0.012479174581204622	0.9905652364651603	0.9999999999992891	1	0.011425783819719815	0.9886612500732493	0.9999999999984589	1
ENSG00000088832	FKBP1A	240.491069428287	0.0977410860849689	0.0605377093727605	0.038355415542136284	0.9995437826048819	1	1	0.002268509254481188	0.87113743891301465	0.9999998974244704	1
ENSG00000088833	NSFL1C	966.202143934325	0.303245713952492	0.0998158421249916	0.9816434781477936	1	1	1	0.042984647236823825	0.9996929908014186	1	1
ENSG00000088854	C20orf194	78.0654654409372	0.0339700790142454	0.0272293747056611	6.52754179842896e-5	0.1924414254833906	0.9832417131147039	0.9999998888344173	1.7861581823153116e-5	0.06804584933627555	0.8809743616954432	0.9999503232685498
ENSG00000088876	ZNF343	57.2248113868993	0.0251291884317946	0.0181628583246862	1.1319302930745678e-5	0.044635404090681896	0.8058861034739055	0.9997318848453586	1.9552818242285497e-6	0.006912806852478304	0.3848979702171502	0.9712180593291592
ENSG00000088881	EBF4	741.979972172551	0.250501346782681	0.241617713560421	0.8977589277515527	1	1	1	0.8692717839188215	1	1	1
ENSG00000088888	MAVS	215.679913999645	0.0885501878797677	0.0454737554258773	0.022109078403436233	0.9975939742932932	0.9999999999999973	1	3.855130812538965e-4	0.5264445160037722	0.9998113404378208	0.9999999999995252
ENSG00000088899	LZTS3	161.997230385579	0.0680089919161478	0.0477340495627671	0.004633223640336137	0.9465987837954537	0.9999999985634415	1	5.203820125390113e-4	0.5932861984263988	0.9999321004055214	0.999999999999967
ENSG00000088930	XRN2	32.275824597116	0.0143303161382951	0.0144028295161268	5.982058851605743e-7	0.0016186145924147466	0.1534017724838792	0.8201812957615846	6.129395643261759e-7	0.0016699954319482346	0.15688888941884904	0.8252973894984835
ENSG00000088992	TESC	204.49674546616	0.0843460589702053	0.0624736126752893	0.016719008147049408	0.9951182069236519	0.9999999999999535	1	0.002754269721616298	0.8959838892300687	0.99999996499605	1
ENSG00000089006	SNX5	91.9830835548148	0.0397853618432991	0.0196579707631676	1.6962658068964132e-4	0.3520951183128326	0.9979652097087808	0.9999999997186989	2.9581825431446163e-6	0.011086595162490553	0.4885386087938818	0.9879440540466539
ENSG00000089012	SIRPG	346.326198474487	0.134950186254715	0.0850814411779708	0.18691696121182189	0.9999998606049392	1	1	0.017580058701687107	0.9956755867677524	0.9999999999999716	1
ENSG00000089022	MAPKAPK5	60.5024661102183	0.0265303225974649	0.00714505338756974	1.5393799784768625e-5	0.05948842288875145	0.8589660130525307	0.9999118379320306	3.031667406006022e-8	2.360950470048362e-5	0.003289688922326839	0.08685422387040953
ENSG00000089041	P2RX7	157.004247853169	0.0660513114332757	0.0547952871071078	0.0038764935028174907	0.9317889547651951	0.9999999954681392	1	0.0012241867146225438	0.7711223596278354	0.9999978297424542	1
ENSG00000089048	ESF1	14.0578788404901	0.0062925311710305	3.96044912609745e-5	1.9009494867106014e-8	1.1423561688372885e-5	0.0015018953878723762	0.04502748308971882	1.679290040357273e-11	2.808819843380661e-11	5.231814981243588e-11	9.979761461664793e-11
ENSG00000089050	RBBP9	93.5798105405207	0.0404480580761368	0.01303996783646	1.8764146206495802e-4	0.37214113113669123	0.9984340647246326	0.9999999998628069	3.8232994592490854e-7	9.016873468081776e-4	0.09878166944831801	0.711368102183217
ENSG00000089053	ANAPC5	145.538346384823	0.0615244080093839	0.0511322978212238	0.002506391705668354	0.8843194050016984	0.999999940533414	1	7.969823304058155e-4	0.6857985697325659	0.9999864494128403	0.9999999999999994
ENSG00000089057	SLC23A2	183.14975385799	0.0762123765129343	0.0482765287176935	0.00920867225219324	0.9826898351099806	0.9999999999906168	1	5.581042638590494e-4	0.6087828510926707	0.9999471904832085	0.9999999999999828
ENSG00000089060	SLC8B1	59.0125740341337	0.025893922089984	0.0209541446258792	1.340889465240025e-5	0.052370775769307376	0.8363807707833255	0.9998529631515464	4.159661502356471e-6	0.016119445002118815	0.5762484950743483	0.9946765180564051
ENSG00000089063	TMEM230	899.135500305789	0.288264328438967	0.151763885599922	0.9687967189577247	1	1	1	0.29776507662637364	0.9999999980021703	1	1
ENSG00000089091	DZANK1	23.6388605877941	0.0105359472074758	0.00317943212950088	1.4622954014331668e-7	2.4133810161186542e-4	0.03247273943420159	0.4241699142816109	2.2429391677292188e-9	3.4031601603423667e-7	2.3775891159205642e-5	7.720446631078737e-4
ENSG00000089094	KDM2B	23.9706081171942	0.010682229094483	0.00398429044797796	1.5527814478666357e-7	2.626734967294819e-4	0.03503878125937543	0.44224358328147995	4.257407981711481e-9	1.0067525679779976e-6	9.031000270121048e-5	0.0031186269629565055
ENSG00000089127	OAS1	382.160453099009	0.14686275500186	0.114665994799086	0.2632865236102446	0.9999999928834594	1	1	0.08815953196904858	0.9999852840444395	1	1
ENSG00000089154	GCN1L1	107.012643578156	0.0459871345664915	0.0386134711950666	4.131992159964737e-4	0.5419006849084529	0.9998498724004021	0.9999999999997393	1.4137268359071253e-4	0.3172810489303747	0.9967999427571042	0.9999999990160191
ENSG00000089163	SIRT4	149.608392453896	0.0631363363374007	0.0494507118561259	0.002939011615743836	0.9035606883983831	0.9999999758975809	1	6.477210421016455e-4	0.6414347279789067	0.9999695871937089	0.9999999999999959
ENSG00000089169	RPH3A	4365.97327986514	0.66291998074346	0.660357891277326	0.9999999999533903	1	1	1	0.9999999999443849	1	1	1
ENSG00000089177	KIF16B	3419.52453996318	0.606349793450053	0.604435348401162	0.9999999979077411	1	1	1	0.9999999976288998	1	1	1
ENSG00000089195	TRMT6	11.1200561703512	0.00498406893864708	0.00487834440966944	8.559707498356772e-9	3.1871098927771513e-6	3.54328749602284e-4	0.012045970948366902	7.9834379107524e-9	2.8449499751559415e-6	3.1045177362742926e-4	0.010612456501890688
ENSG00000089220	PEBP1	169.244193981123	0.0708358711962033	0.0505394287645556	0.005933252556889812	0.9631209325926122	0.9999999997362752	1	7.413657492424397e-4	0.670501646822331	0.9999819372123852	0.9999999999999989
ENSG00000089327	FXYD5	181.409117769064	0.0755427787904776	0.0443524976363983	0.008736297159669615	0.9809110821859522	0.9999999999856735	1	3.3046948715464985e-4	0.49228360292538165	0.9996916438938709	0.9999999999982633
ENSG00000089335	ZNF302	985.766864216761	0.307497989083372	0.292930928693546	0.9843011742835692	1	1	1	0.9734577335684549	1	1	1
ENSG00000089351	GRAMD1A	407.727308556825	0.155163478047786	0.131344902793414	0.3224899374002679	0.9999999991847319	1	1	0.16628139434192024	0.9999996682239276	1	1
ENSG00000089486	CDIP1	35.0411636480198	0.015539035035322	0.0038220310493582	8.880314235071296e-7	0.002669215778652423	0.21690731266745067	0.8921907935956883	3.7657623686015995e-9	8.195706928670887e-7	7.03539262734143e-5	0.002414424606717147
ENSG00000089597	GANAB	54.8352495421117	0.0241051520338228	0.00133869130423864	8.965075521616406e-6	0.03560422438039679	0.7591770201477902	0.9994152399723527	3.196179987341452e-10	1.0856059384778405e-8	2.654898139109463e-7	4.682925311416675e-6
ENSG00000089723	OTUB2	38.5082083984912	0.0170502848983655	0.00926659424313946	1.4138882740155623e-6	0.00471353575807909	0.30997249307217467	0.9478933830999116	8.47810958104489e-8	1.1030790567023718e-4	0.01565879657861291	0.27299871702252454
ENSG00000089737	DDX24	166.273229191168	0.0696790405881252	0.0513295597793324	0.00536972854272022	0.956987565788173	0.999999999469591	1	8.162477094537657e-4	0.6908013388771329	0.9999876922925475	0.9999999999999996
ENSG00000089775	ZBTB25	365.461242431153	0.141352435083306	0.0870059829017976	0.22651110010465392	0.9999999712428828	1	1	0.019994925972989352	0.9968673032766457	0.9999999999999923	1
ENSG00000089818	NECAP1	360.012147744167	0.139538935139876	0.0030918178406104	0.21493259944250742	0.9999999548093823	1	1	2.080518979319379e-9	2.991709175947932e-7	2.0232139816944716e-5	6.492143738537903e-4
ENSG00000089847	ANKRD24	414.413244875032	0.157307607559759	0.0752739671566251	0.3383673444994675	0.9999999995396461	1	1	0.008552164778121485	0.9801522313222645	0.9999999999830308	1
ENSG00000089876	DHX32	926.625384344752	0.294482269467139	0.123419639196108	0.9748652148130466	1	1	1	0.12550653047996319	0.9999978932343904	1	1
ENSG00000089902	RCOR1	26.460065813505	0.0117785605077841	0.0114903374513188	2.3960312534043737e-7	4.7994264938466813e-4	0.059155399642824236	0.5752956199237862	2.143484613137403e-7	4.117695613198302e-4	0.05193729382791035	0.541127691803567
ENSG00000089916	GPATCH2L	264.86106849877	0.106589890218203	0.105289743838818	0.06086790350552174	0.9999198503934055	1	1	0.05709387383649467	0.9998956862152817	1	1
ENSG00000090006	LTBP4	146.671683473561	0.0619738193927649	0.0489474830034095	0.002621355396006053	0.8899636454573697	0.9999999536988363	1	6.079316049234507e-4	0.6275975620232274	0.9999614228036185	0.9999999999999923
ENSG00000090013	BLVRB	32.0742327153149	0.0142420850296054	8.67984173981318e-4	5.806895535531709e-7	0.001557875576153167	0.14921723089085093	0.8138134838838299	1.5496348648724734e-10	2.859038894520438e-9	4.266444242340128e-8	5.147023079965507e-7
ENSG00000090020	SLC9A1	11.5779009289066	0.00518821275478989	0.00285481798250866	9.768852504699055e-9	3.949268632008618e-6	4.540588969251802e-4	0.015239678211500629	1.6870430608051379e-9	2.0848327686451285e-7	1.283103853211287e-5	3.9628427148097334e-4
ENSG00000090060	PAPOLA	12.9880976274409	0.00581646522936722	0.00623736741700975	1.440171748523511e-8	7.3634981087034035e-6	9.220748706578741e-4	0.029261863566406365	1.8420050595935322e-8	1.0871244403465319e-5	0.0014221488955170614	0.04294292429032964
ENSG00000090238	YPEL3	194.706170089277	0.080633483485934	0.00546787921653325	0.012857261531375341	0.9911476121589237	0.9999999999994557	1	1.1649648801181911e-8	5.245780194340632e-6	6.284951336924527e-4	0.020634954970997432
ENSG00000090263	MRPS33	136.89827864496	0.0580840844449452	0.0466815432986476	0.0017566435391265234	0.8334107117877566	0.9999996122179161	1	4.533153366149678e-4	0.5625716310181051	0.9998901597241847	0.9999999999998849
ENSG00000090266	NDUFB2	87.2976783762673	0.0378354640558135	0.00781173709717205	1.2492701429411834e-4	0.2947386830823173	0.9957100851291081	0.9999999977689481	4.266188013968275e-8	3.975683635981664e-5	0.005669325669656833	0.13305769571480897
ENSG00000090316	MAEA	100.116793033223	0.0431516177693514	0.0240389962586106	2.790670540618878e-4	0.45530265005887094	0.9994842977172984	0.9999999999931757	8.828759022083688e-6	0.03507069762587811	0.7559280419086878	0.9993856400233173
ENSG00000090339	ICAM1	138.679135259371	0.0587952524725757	0.035764872075697	0.0018939911258443187	0.8450938674497325	0.9999997352311946	1	8.889729658212442e-5	0.23765587777073904	0.9909199001613839	0.9999999812733565
ENSG00000090376	IRAK3	230.538868583776	0.0940768055301279	0.0509386263260122	0.0310803018596868	0.9990983287752502	0.9999999999999999	1	7.784409708000428e-4	0.6808442935717349	0.9999851112435822	0.9999999999999993
ENSG00000090382	LYZ	6181.02312175115	0.735746471849103	0.349068071042006	0.9999999999997384	1	1	1	0.9970030164756325	1	1	1
ENSG00000090432	MUL1	695.998326260779	0.238682690587572	0.14688149123826	0.8586294480850141	1	1	1	0.2634153685509465	0.999999992917582	1	1
ENSG00000090447	TFAP4	20.4567956588291	0.00913063608210022	0.00559739076318018	7.975142057858875e-8	1.008781357989541e-4	0.014366385223621547	0.2579949468301803	1.2616314659652517e-8	5.9610987613867294e-06	7.266684224270792e-4	0.02357786116717764
ENSG00000090470	PDCD7	234.29393223367	0.0954628657784431	6.98719622360966e-4	0.03370098687792844	0.99930122076698	1	1	1.1360201668253467e-10	1.5974395140005981e-9	1.8965643944213184e-8	1.8969411841318617e-7
ENSG00000090487	SPG21	116.430282306428	0.0498325514731356	0.0025770730990901	6.793576521990641e-4	0.6517682731031811	0.9999746407059394	0.9999999999999974	1.302517316226215e-9	1.3304058865681867e-7	7.2380729988497094e-06	2.1107480149695768e-4
ENSG00000090554	FLT3LG	20.8475722354734	0.00930343165406643	1.96854008346398e-4	8.618918734271119e-8	1.1298923455405063e-4	0.016023990545829037	0.2771183103571906	3.2237323921435745e-11	1.3425571765424138e-10	5.546239023601629e-10	2.186674064041938e-9
ENSG00000090565	RAB11FIP3	49.9111117047481	0.0219881348865964	0.009876661808181	5.39998038417977e-6	0.021271656133497352	0.6420501658966222	0.9973337653116578	1.1079385586754142e-7	1.6250377550519612e-4	0.022596165138357494	0.3437343473056401
ENSG00000090581	GNPTG	97.5486192965525	0.0420912935695656	0.0243692394346204	2.3949833822078936e-4	0.42254971356991844	0.9991964284349756	0.9999999999775593	9.52750966376481e-6	0.037793154255256534	0.7718680626903448	0.9995204422395161
ENSG00000090612	ZNF268	188.002333453249	0.0780739830860713	0.00636910879075878	0.01062896199894614	0.9868803746344326	0.999999999997139	1	1.985364972423298e-8	1.2230349869968293e-5	0.0016187395379771985	0.048039516574365004
ENSG00000090615	GOLGA3	53.7846034276296	0.0236542209611903	0.0187336366163057	8.070838294349514e-6	0.03208289746077175	0.7364822816292721	0.9991832521261558	2.296513113120291e-6	0.008324087617373244	0.42438269854197763	0.9791556821946175
ENSG00000090621	PABPC4	245.790029685403	0.0996800322518792	0.0558107623659885	0.042669927422336995	0.999684856149597	1	1	0.0013717982927305972	0.7918197314165416	0.9999987150770161	1
ENSG00000090659	CD209	132.555344027675	0.0563452606393245	0.0154737101445554	0.001455271125769264	0.8021866353680167	0.9999990275588616	1	8.697507927202253e-7	0.002600843398004704	0.2131976726690693	0.8889877155761667
ENSG00000090661	CERS4	1104.44223176529	0.332218806876013	0.331799254671083	0.9939759610924574	1	1	1	0.9938731229131894	1	1	1
ENSG00000090674	MCOLN1	32.0100419473732	0.0142139872163684	7.56258386791834e-4	5.752046287055279e-7	0.001538935642355077	0.1478981751402385	0.8117525932588144	1.267518312531024e-10	1.9630470582399084e-9	2.5293762861977598e-8	2.707380867272846e-7
ENSG00000090686	USP48	40.7596376867924	0.0180291778954872	0.0105103738427776	1.8820087891446846e-6	0.006611747714842409	0.37571964402421587	0.9690129767436029	1.4469466202982062e-7	2.3776415357545932e-4	0.03203874644489946	0.42101306080234147
ENSG00000090857	PDPR	51.4524344240092	0.022651777181967	0.00798991465268862	6.354208085923574e-6	0.025183004148282118	0.6815598694596743	0.9983190915534047	4.6595887481792886e-8	4.5418022497467625e-5	0.006497804891254733	0.14744458860089438
ENSG00000090861	AARS	21.96753675715	0.00979832954625403	0.00106232455302196	1.0711628950499374e-7	1.548030464263439e-4	0.021594418001591897	0.33439211361881516	2.1328694366218315e-10	5.170482264560405e-9	9.65960660348486e-8	1.3916690729809389e-6
ENSG00000090863	GLG1	90.1075383059452	0.0390057764895322	0	1.5034477323427886e-4	0.3288314500256656	0.9972458982005985	0.9999999993513105	1.3510859098175843e-11	1.3510859098175843e-11	1.3510859098175843e-11	1.3510859098175843e-11
ENSG00000090905	TNRC6A	203.692194340946	0.0840421051883342	0.0831111177178676	0.01637275874660138	0.9948689808406506	0.9999999999999429	1	0.01534656529181122	0.9940306145335455	0.9999999999998938	1
ENSG00000090920	FCGBP	2111.85307517497	0.487517244589296	0.443070180687456	0.9999970112686849	1	1	1	0.9999662362422239	1	1	1
ENSG00000090924	PLEKHG2	46.6841728717683	0.0205957995518282	0.00105944331911522	3.7915599354620966e-6	0.014579476452666662	0.5524574470423165	0.9932890805450258	2.1232970937035134e-10	5.1277426749152255e-9	9.550202773045413e-8	1.3726208047959432e-6
ENSG00000090971	NAT14	48.2314932351831	0.0212639200976751	0.019486545235219	4.502336297118603e-6	0.01754933122334912	0.5964414550871879	0.9956571023939429	2.8243539893502145e-6	0.010526254720469419	0.4766801259497425	0.9866250648131223
ENSG00000090975	PITPNM2	15.977031758187	0.00714543643841638	0.00146166032173816	3.0322793165282746e-8	2.361683551999061e-5	0.0032907714384109443	0.0868772928857865	3.7708980382689106e-10	1.4663216640897758e-8	3.983584779820859e-7	7.577368694278164e-6
ENSG00000091039	OSBPL8	706.965192256723	0.241535223625821	0.143986468902375	0.8689812761107816	1	1	1	0.24380378009992465	0.9999999851851636	1	1
ENSG00000091073	DTX2	705.822541142402	0.241239012693781	0.0529505638697959	0.867934031588165	1	1	1	9.899057853394178e-4	0.7301944931945394	0.9999944763011104	1
ENSG00000091106	NLRC4	85.8533192982155	0.0372327756408828	0.025018450772815	1.1333991207340688e-4	0.2776525124899387	0.9946392193907804	0.9999999958233906	1.1041376471565556e-5	0.04358701168872814	0.8011606280089788	0.9997078932924359
ENSG00000091127	PUS7	705.350153375679	0.241116487392713	0.242399468590756	0.8674989838516821	1	1	1	0.8720005091384535	1	1	1
ENSG00000091140	DLD	28.8132838569853	0.0128126617108767	0.0125533198865469	3.522609760553408e-7	8.084943184298865e-4	0.0906441803026099	0.688805307894713	3.204485293784032e-7	7.121885193388522e-4	0.08190207399635574	0.6619235297413415
ENSG00000091262	ABCC6	335.703290507994	0.131354563636089	0.112852286051451	0.16633499951610176	0.9999996689868554	1	1	0.08144074278301239	0.9999782832689087	1	1
ENSG00000091317	CMTM6	30.0639656297276	0.0133613826490989	0.0104505656182535	4.285855715879805e-7	0.00104872652597221	0.11105030827992945	0.7415923608981865	1.4115846724838121e-7	2.2958140867224142e-4	0.031040480535020842	0.4136358102404142
ENSG00000091436	MLTK	222.993666738824	0.091278855845951	0.0907296121130876	0.02625328022898421	0.998507454800481	0.9999999999999996	1	0.025375699919394812	0.9983550288797487	0.9999999999999994	1
ENSG00000091490	SEL1L3	87.183448453314	0.0377878267598356	0.0177793162286166	1.2397566489186218e-4	0.29337557213670884	0.9956332658858829	0.9999999976550542	1.751384061110528e-6	0.00607728316753553	0.3586680616081487	0.9644928058316555
ENSG00000091527	CDV3	118.105026930956	0.0505131401586278	0.0390878802770988	7.389772996063693e-4	0.6698144479485122	0.9999817066309549	0.9999999999999989	1.5228285713886347e-4	0.3312628727543233	0.9973315687659917	0.9999999994056724
ENSG00000091536	MYO15A	130.783424978844	0.0556339744398278	0.0174047878486286	0.0013450838774576868	0.788310790033869	0.9999985916124404	1	1.5702370085302064e-6	0.005341776345334837	0.3334254060688806	0.9566474455753852
ENSG00000091542	ALKBH5	344.144296775756	0.134214091308549	0.0121406559864174	0.18260241072615468	0.9999998333903404	1	1	2.748961650533843e-7	5.789114556840058e-4	0.0691674631189999	0.6168548015934132
ENSG00000091592	NLRP1	179.920949099088	0.0749695314617044	0.0676092584504109	0.00834736993966212	0.9792604197719624	0.9999999999794533	1	0.004469702433955169	0.943818116922754	0.9999999981805608	1
ENSG00000091640	SPAG7	670.871465172999	0.232065476883059	0.091923938987262	0.8322657063000378	1	1	1	0.027312783106398286	0.9986694940465599	0.9999999999999998	1
ENSG00000091831	ESR1	39.0675876644206	0.0172936780987643	0.0186118084604238	1.5197064783256664e-6	0.005137995360433356	0.3260240295305178	0.9540504863391592	2.2196637756710658e-6	0.008005123863987329	0.4159262581473764	0.9776470413863075
ENSG00000091947	TMEM101	199.646701131143	0.0825106826702474	0.0321392173580823	0.014711624583733762	0.9934247805821967	0.9999999999998418	1	4.694904594182425e-5	0.15120168804839218	0.969840039738186	0.9999993584151825
ENSG00000091972	CD200	13.0474547446946	0.00584289183688053	0.0060930969437336	1.4630512690239073e-8	7.5505063117375926e-6	9.483753655608052e-4	0.030010742041005734	1.6949747827510464e-8	9.53439434858705e-6	0.0012300985266902043	0.037819825575900246
ENSG00000092010	PSME1	27.1737634691169	0.0120924175561603	0.00992928870176994	2.699523815596905e-7	5.648077748128255e-4	0.06777172359590578	0.6114186259994625	1.1332431404387222e-7	1.6785929950213774e-4	0.023288663758166184	0.350044902934724
ENSG00000092020	PPP2R3C	2241.39124453445	0.502397373752039	0.160745074015354	0.9999987225115733	1	1	1	0.36419641991145213	0.9999999998176575	1	1
ENSG00000092036	HAUS4	2214.88050553311	0.499422814835654	0.128175425299926	0.9999984837008118	1	1	1	0.1491997664696787	0.9999992983736947	1	1
ENSG00000092068	SLC7A8	2319.37081209506	0.510945438939499	0.479655237274889	0.9999992224535486	1	1	1	0.9999953521920554	1	1	1
ENSG00000092094	OSGEP	1674.01613543533	0.429894504083298	0.394474861854621	0.9999330955735946	1	1	1	0.9996138142373976	1	1	1
ENSG00000092096	SLC22A17	112.449680617196	0.0482109781624273	0.0423251831792445	5.534269032013706e-4	0.6069233818417745	0.9999455553682761	0.9999999999999813	2.477882727698333e-4	0.42977060033655945	0.9992706933602115	0.9999999999827163
ENSG00000092108	SCFD1	513.68269858018	0.187908676763026	0.18810847555059	0.5712787838821525	0.9999999999999188	1	1	0.5727440611750695	0.9999999999999235	1	1
ENSG00000092200	RPGRIP1	80.6681855150396	0.0350629378121212	0.0290176038235892	7.890841828217532e-5	0.2194507785601908	0.9884120583950564	0.9999999621481496	2.5783596271478082e-5	0.09360127317800748	0.9251699413108478	0.9999891483207202
ENSG00000092203	TOX4	222.49880899094	0.0910947461558274	0.0901996590705055	0.025956616222395756	0.9984579064836608	0.9999999999999996	1	0.02454999279559389	0.9981941840769499	0.9999999999999991	1
ENSG00000092295	TGM1	870.980854201251	0.281781381148776	0.0617838145822985	0.961140971233187	1	1	1	0.0025722318815759593	0.8876043075485616	0.9999999485240505	1
ENSG00000092421	SEMA6A	222.720306914434	0.0911771627246868	0.0739021652610076	0.02608910548971477	0.9984802750607903	0.9999999999999996	1	0.0076599773884354905	0.9758454206293982	0.9999999999599615	1
ENSG00000092529	CAPN3	61.9072612665203	0.027129613160598	0.00531700662954235	1.7489794549518933e-5	0.06677640124351802	0.8780070838617223	0.9999460454403438	1.0601272082411128e-8	4.507037662748736e-6	5.284674529596467e-4	0.01756891901162838
ENSG00000092531	SNAP23	87.4732312354762	0.0379086656570403	0.0102857482915466	1.2640107937145206e-4	0.2968373422775371	0.995825690463326	0.9999999979334323	1.3179143665276172e-7	2.0826244883875855e-4	0.028408537915472376	0.393365565971983
ENSG00000092621	PHGDH	609.993398328788	0.215545873247977	0.211995010823054	0.7514905792039963	1	1	1	0.7313173870505663	1	1	1
ENSG00000092758	COL9A3	3438.18748306327	0.607648207726387	0.298324074589089	0.999999998078218	1	1	1	0.978070586514569	1	1	1
ENSG00000092820	EZR	80.8867567057016	0.0351546013596564	0.0353580070619657	8.015545490758225e-5	0.22179149884315708	0.988771880170895	0.9999999654538002	8.298324287503434e-5	0.2270255243140542	0.9895343642387858	0.9999999718102078
ENSG00000092841	MYL6	12.3116353700929	0.00551519562726812	3.08014821580742e-4	1.1995473725434636e-8	5.498005378412607e-6	6.629769606104619e-4	0.02167576661997639	4.571654166340977e-11	2.750454308753092e-10	1.564425811118042e-9	8.251297423100823e-9
ENSG00000092847	AGO1	11.5643427741829	0.00518216864847669	0.00111923524407136	9.731147665448248e-9	3.924628503182426e-6	4.507971866015703e-4	0.015136567068119389	2.3280044558759982e-10	6.0756264463890375e-9	1.2049173991890427e-7	1.8175231241146506e-6
ENSG00000092871	RFFL	182.164230581063	0.0758333790262953	4.24734726554742e-5	0.00893888191126857	0.9817021946512902	0.9999999999880741	1	1.7039702981946903e-11	2.930056197669728e-11	5.602929231685039e-11	1.0942458050777759e-10
ENSG00000092929	UNC13D	138.625840956295	0.0587739854915225	0.00469250156826957	0.0018897585204095124	0.8447534981163323	0.9999997321802186	1	7.047363581591526e-9	2.3198952898706438e-6	2.4447496496071697e-4	0.00842124325937843
ENSG00000092931	MFSD11	89.2520747133506	0.038649775696068	0.0354232209343405	1.4218326695181194e-4	0.31834509055610316	0.9968438776922767	0.9999999990531346	8.390779305578189e-5	0.22871509575531912	0.9897686629193287	0.9999999735936053
ENSG00000093000	NUP50	886.368053254997	0.285339031968932	0.144507771775886	0.9655225477701713	1	1	1	0.24728992385844106	0.9999999870197448	1	1
ENSG00000093010	COMT	176.622024869312	0.0736962370522083	0.0685324470969359	0.00753271502847197	0.9751320066169102	0.999999999954491	1	0.004854661883865741	0.9500630216732135	0.9999999989471017	1
ENSG00000093072	CECR1	348.110055185997	0.135551065844328	0.132757190645573	0.19047666267114582	0.9999998795489441	1	1	0.17421517449471013	0.999999763326577	1	1
ENSG00000093134	VNN3	1136.19658203602	0.338536958209627	0.159994086608757	0.9953441133578549	1	1	1	0.3585189074758516	0.9999999997765385	1	1
ENSG00000093144	ECHDC1	434.47136225547	0.163675287077238	0.126397867150632	0.38650007946671183	0.9999999999179737	1	1	0.14006808694389217	0.9999989380955003	1	1
ENSG00000093167	LRRFIP2	568.840070102584	0.203970129445845	0.150010947220505	0.6822274607511867	0.9999999999999993	1	1	0.2852623634127459	0.9999999968436577	1	1
ENSG00000093183	SEC22C	71.0028973765683	0.0309920591797915	0.00825988757205659	3.788540824345432e-5	0.12811871004275677	0.9572871664132179	0.9999981413696539	5.313575179854979e-8	5.53138964176636e-5	0.007935613116514473	0.17082637383767307
ENSG00000093217	XYLB	63.034535715922	0.0276099790562982	0.0126254157819216	1.934335534148346e-5	0.07303851334105638	0.8917819830136401	0.999963832891492	3.290349609441634e-7	7.379365873598775e-4	0.0842746213510508	0.6695141980629271
ENSG00000094916	CBX5	28.8174395581818	0.0128144859832835	0.00235506547668453	3.524939842236563e-7	8.092086679581945e-4	0.09070771652163634	0.6889901775120935	1.0470507794124728e-9	9.078671914242165e-8	4.424724652229983e-6	1.2186572031624987e-4
ENSG00000094975	SUCO	12.7636743341082	0.00571653618375656	0.00538664243934777	1.356310019851037e-8	6.692023468479746e-6	8.280844204801019e-4	0.026555108648928294	1.1075059758169914e-8	4.835998912655626e-6	5.728202417951689e-4	0.01893725760487186
ENSG00000095002	MSH2	1186.81583970043	0.348365129065734	0.346405041581714	0.996912268396901	1	1	1	0.996645519429293	1	1	1
ENSG00000095059	DHPS	25.6055821880807	0.0114025287393216	1.76463736009896e-4	2.0712153758761787e-7	3.9270867252172437e-4	0.049866948526150146	0.5305628930078699	3.000477644121702e-11	1.1518386244802059e-10	4.435768419241981e-10	1.6396307644939156e-9
ENSG00000095066	HOOK2	77.775711027349	0.0338482605826549	3.48377501319813e-4	6.388952518521229e-5	0.18953724527956828	0.982552634492401	0.9999998748266072	5.118683255034284e-11	3.444052820711363e-10	2.1601057609288432e-9	1.2437308849477802e-8
ENSG00000095139	ARCN1	73.1138962848858	0.0318841102499701	0.0234210711504063	4.47868122342987e-5	0.1458796365333508	0.96736865624373	0.9999991852814291	7.639485541166557e-6	0.030366294543284766	0.7242490221987588	0.9990314365750527
ENSG00000095261	PSMD5	153.432595344988	0.0646458617135012	0.0136333031453615	0.003397986369843009	0.9191715972796235	0.9999999897948076	1	4.7138514669420317e-7	0.0011883248985256056	0.12212695801886875	0.7655681377300223
ENSG00000095303	PTGS1	45.4168573435357	0.0200479029704018	0.017854354009756	3.28313737119057e-6	0.012448563248249611	0.5153488671933244	0.9905159668297095	1.7897649352560663e-6	0.006234001814338197	0.36377330209787917	0.9659070287356343
ENSG00000095321	CRAT	1059.09976589492	0.322984917052645	0.0120994535888532	0.9913025045481477	1	1	1	2.706687097786542e-7	5.668466703971919e-4	0.0679741081867612	0.6122135833549199
ENSG00000095370	SH2D3C	21.8227968505011	0.00973439866931482	5.76089689751341e-4	1.0419210427770054e-7	1.487513884175229e-4	0.02080212134002235	0.3268159180553004	8.847356181007626e-11	9.94523352559895e-10	9.747593066045113e-9	8.293238196177555e-8
ENSG00000095380	NANS	10.8125076494906	0.00484689215808786	0.00171305422940143	7.818262037773138e-9	2.749490065734328e-6	2.983265544952429e-4	0.010213044629602264	5.171603145726067e-10	2.5930463554146854e-8	8.542775656872337e-7	1.8547700211368756e-5
ENSG00000095383	TBC1D2	181.491229650356	0.0755743878676502	0.0733521162132038	0.008758154235085969	0.9809985895796286	0.9999999999859561	1	0.0073238239745360145	0.9738982148258926	0.999999999943657	1
ENSG00000095397	DFNB31	875.625114750327	0.282858899993435	0.0878963198719297	0.9625162953771877	1	1	1	0.02119413926839997	0.9973079802951225	0.9999999999999958	1
ENSG00000095485	CWF19L1	1043.44101211681	0.319736440230611	0.00613971961613127	0.9901291791190008	1	1	1	1.741383681697073e-8	9.949947048726315e-6	0.0012896349529896156	0.039424190849072005
ENSG00000095539	SEMA4G	100.907318500986	0.0434775304022737	3.31531016218565e-4	2.922938420507615e-4	0.46536294899383146	0.9995509214213641	0.9999999999952829	4.886491211664179e-11	3.1411862000396695e-10	1.8931263223720407e-9	1.0517946735788541e-8
ENSG00000095564	BTAF1	11.3333252991307	0.00507917179859777	0.0044709278032492	9.106738252384616e-9	3.524667078536048e-6	3.981885079644698e-4	0.013461171260201077	6.050171363902734e-9	1.804976871522257e-6	1.817720836315706e-4	0.006296192385175092
ENSG00000095787	WAC	41.2298859347125	0.0182333897986978	0.0182213372787422	1.9949232635818603e-6	0.007076018256861105	0.38975377337708905	0.9723249982191559	1.9881005998145795e-6	0.0070479120845865495	0.38892340971656125	0.9721385380481117
ENSG00000095794	CREM	42.3123089349615	0.0187031245720804	0.00487686121618382	2.277053895105574e-6	0.008243269513574791	0.4222638476107403	0.9787865998035974	7.975585192276924e-9	2.840384978886057e-6	3.0987072058041853e-4	0.010593349144044861
ENSG00000095906	NUBP2	18.3160929183349	0.00818297870273283	8.93739505959924e-4	5.119860280178301e-8	5.232226697760023e-5	0.007502421139927273	0.1639750615833797	1.6199419583529107e-10	3.1054230298366292e-9	4.7840629124884515e-8	5.921033692235511e-7
ENSG00000095951	HIVEP1	25.8428551632688	0.0115069739202167	0.0105977742921421	2.1574165642856968e-7	4.154678261542033e-4	0.05233624200681142	0.5431218986342028	1.4999765529655207e-7	2.5016818267764585e-4	0.03353983737834898	0.43180642727482366
ENSG00000096006	CRISP3	151.680934530662	0.0639550338843021	0.0641703533630849	0.0031811583413459132	0.9123035317019649	0.999999984852663	1	0.0032474875557081395	0.9144931765615569	0.9999999866030927	1
ENSG00000096063	SRPK1	97.1131858686969	0.0419112827379163	0.0432513148759658	2.3328007513490068e-4	0.41699659312556225	0.9991344519134581	0.9999999999725803	2.8305795226291064e-4	0.45838125610534564	0.9995056159192687	0.9999999999939037
ENSG00000096070	BRPF3	25.2464516550247	0.0112444010929914	0.00770305455921761	1.9463056444291027e-7	3.602673378523269e-4	0.04628670376581545	0.5113883322615318	4.040225909385242e-8	3.661109373720439e-5	0.005207324488941012	0.12469991249050416
ENSG00000096092	TMEM14A	39.3445760827718	0.0174141547505724	0.0142614771517941	1.5745622855556363e-6	0.0053592498696898305	0.3340513362889328	0.9568604995972985	5.845011890048823e-7	0.0015710600205403047	0.15013141933603835	0.8152265251046275
ENSG00000096093	EFHC1	106.807775093204	0.0459031365790092	0.040608801391344	4.0855729652800044e-4	0.5393811982799773	0.9998441312456773	0.9999999999997123	1.9224923119720572e-4	0.37703423981886786	0.9985313743688072	0.9999999998848587
ENSG00000096401	CDC5L	37.2015103643704	0.0164812535316641	0.0142460289314597	1.1909316300906525e-6	0.0038313655436086336	0.2734573265289699	0.9307263104250653	5.814630171796509e-7	0.0015605494994122004	0.14940290266671774	0.8141014790713307
ENSG00000096433	ITPR3	1202.36812367397	0.351326356553136	0.194884512594226	0.9972780033202923	1	1	1	0.6212955818115804	0.9999999999999899	1	1
ENSG00000096654	ZNF184	49.292180784926	0.0217213901331455	0.00289203422080535	5.0528809685257414e-06	0.019836785024706427	0.6255326486995724	0.9968027837380031	1.7446188937952911e-9	2.2093029117264962e-7	1.380853665999826e-5	4.293072369312423e-4
ENSG00000096696	DSP	3271.81757657759	0.595762246461313	0.157177138100901	0.9999999958336022	1	1	1	0.337395626629725	0.99999999952329	1	1
ENSG00000096717	SIRT1	430.186215853169	0.162323014616798	0.139510974181506	0.3761796814757101	0.9999999998812803	1	1	0.21475625009984878	0.9999999544947074	1	1
ENSG00000096872	IFT74	61.0854444554072	0.0267791128139836	0.0266362504348087	1.623598608624377e-5	0.06244407481314007	0.8671271746292428	0.9999280179847095	1.5747651221920123e-5	0.06073481532674896	0.8624859105056895	0.9999191142840684
ENSG00000096968	JAK2	48.4135066221068	0.0213424521061856	0.0207668826096971	4.592983793294536e-6	0.01792685171581687	0.6014999204934228	0.9958775823716393	3.963630503256432e-6	0.015299771158059472	0.5638695904239952	0.9939884293584287
ENSG00000096996	IL12RB1	1187.40511145392	0.348477821865818	0.263242165565858	0.9969269871083861	1	1	1	0.9297513296891662	1	1	1
ENSG00000097007	ABL1	11.0342888356917	0.00494581768236747	0.00513398214544916	8.347413982257024e-9	3.059430755625314e-6	3.3788299594661453e-4	0.011510801919192404	9.43479383508361e-9	3.7328864026520137e-6	4.2549553637760695e-4	0.014333724660995362
ENSG00000097021	ACOT7	71.6088560505636	0.0312482891054876	0.0201788843347287	3.9766886669956314e-5	0.13308396380145415	0.9604265306172779	0.9999985308991156	3.3989892993524506e-6	0.012934295673985297	0.5242885988941599	0.9912605865947981
ENSG00000097033	SH3GLB1	92.494634574472	0.0399977726181804	0.0369346184812915	1.7523246024619965e-4	0.35849629225700996	0.9981282007300115	0.9999999997763573	1.0795664436125119e-4	0.2693342405757403	0.9940226739568383	0.99999999431767
ENSG00000097046	CDC7	1386.68796715917	0.384476832979651	0.376935087018024	0.99938141539938	1	1	1	0.9991238350666863	1	1	1
ENSG00000099139	PCSK5	139.860739585213	0.0592665224854733	0.0584345612052727	0.0019898202126004128	0.8524953010607976	0.9999997947474192	1	0.0018232594407244784	0.8392462065170818	0.9999996785668501	1
ENSG00000099203	TMED1	102.190274536287	0.0440059867862005	0.0285906857905526	3.148732799808096e-4	0.4816422277706588	0.999641858121363	0.9999999999974167	2.3659648231144637e-5	0.08701197423121709	0.9160783596123168	0.9999842894517713
ENSG00000099204	ABLIM1	17.8121235763292	0.00795961528167208	0.00781346637184457	4.590618529753954e-8	4.4409082509466735e-5	0.006350451040252891	0.1449385939403931	4.269867348583034e-8	3.9808711936872854e-5	0.005676935142853723	0.1331932518381751
ENSG00000099219	ERMP1	930.873467281525	0.295433465338313	0.248149123581216	0.9756952191802251	1	1	1	0.890742932429598	1	1	1
ENSG00000099246	RAB18	30.1937971121806	0.0134183096366768	0.0135302537315471	4.372586372980436e-7	0.001076753759687299	0.11331640595871684	0.7467342143381128	4.5475337606681876e-7	0.0011336988925139124	0.11785421282620945	0.7566567211736727
ENSG00000099250	NRP1	65.5366457415247	0.0286745110228858	0.0284453297806611	2.406434339041752e-5	0.08828138096510108	0.9179312086613131	0.9999853855218476	2.2971794016446445e-5	0.084838953797293	0.9127848937501751	0.9999821973084413
ENSG00000099282	TSPAN15	521.624567916929	0.190261122555251	0.186560426430176	0.588416469546009	0.9999999999999597	1	1	0.5613465316697355	0.9999999999998791	1	1
ENSG00000099284	H2AFY2	107.988527874731	0.0463870532787014	0.025054922715868	4.359175309426311e-4	0.5538410774756692	0.9998745363000652	0.999999999999837	1.1132254696066823e-5	0.043930337357285576	0.802725695032665	0.9997160128393171
ENSG00000099290	FAM21A	1970.51407792817	0.470232062530717	0.434761314727491	0.9999921650750997	1	1	1	0.9999479298121482	1	1	1
ENSG00000099308	MAST3	255.92404875793	0.103365064403456	0.026504297499813	0.05180992432086584	0.9998466782275961	1	1	1.5307920723017787e-5	0.05918492108961837	0.8580909118839348	0.9999099561415989
ENSG00000099326	MZF1	172.879508753206	0.0722474776188309	0.00106749081636364	0.006684381016122232	0.9695654694909036	0.9999999998886177	1	2.150105649079137e-10	5.247838608113398e-9	9.85843690015642e-8	1.4263946243042724e-6
ENSG00000099330	OCEL1	561.357561454521	0.201828621114416	0.15489203123272	0.66834848921980206	0.9999999999999988	1	1	0.3204945153143709	0.9999999991238557	1	1
ENSG00000099331	MYO9B	31.8850981325133	0.0141592917680194	0.00767889355347437	5.646550660376448e-7	0.0015026162230509232	0.14534933821127438	0.80769498379751	3.9913830018889485e-8	3.594167321119279e-5	0.005108874519091922	0.12288532285953968
ENSG00000099337	KCNK6	450.434108605388	0.168674488973114	0.00962575968093435	0.4249364744906158	0.9999999999794134	1	1	9.937822020855691e-8	1.389312721463698e-4	0.019506715461030888	0.3140507327643054
ENSG00000099338	CATSPERG	1524.62236478482	0.407149831481721	0.171584422733464	0.9997907057656786	1	1	1	0.44740952158463154	0.9999999999908943	1	1
ENSG00000099341	PSMD8	33.1961363344597	0.0147329101977175	0.00801730298342664	6.840139133990064e-7	0.0019213226352224888	0.17330088331425975	0.8472636003639709	4.7226804356093055e-8	4.6346939260977216e-5	0.006633351933704179	0.14973060586571552
ENSG00000099365	STX1B	15.7688276108018	0.00705297766748666	8.45872073599634e-5	2.887543104623802e-8	2.1903279359469785e-5	0.0030378033422097106	0.08142398621579583	2.0806578682197596e-11	4.979783252423431e-11	1.2794387771464244e-10	3.2613833855776875e-10
ENSG00000099377	HSD3B7	416.623643058996	0.158014073853799	0.00640877593584413	0.3436407535876087	0.9999999996190584	1	1	2.0303020153988882e-8	1.2667268437849266e-5	0.0016821747485319394	0.04965462813680954
ENSG00000099622	CIRBP	18.4204706523343	0.00822922721349401	0.00786649927905369	5.2356223467775465e-8	5.410409041173292e-5	0.007760589256979422	0.1680771351681194	4.384006246915817e-8	4.1428174450408584e-5	0.005914329490360082	0.13738939710288378
ENSG00000099785	MARCH2	724.913011012204	0.246157699158333	0.132018409931051	0.8845115860414736	1	1	1	0.1700405457414771	0.9999997174980947	1	1
ENSG00000099795	NDUFB7	14.3898730472442	0.00644018003340634	0.00133306044192996	2.0664750022270084e-8	1.3022665656614585e-5	0.0017338482534662303	0.050960191284259326	3.1714564308060744e-10	1.0703477548723583e-8	2.604504797387719e-7	4.577307243014417e-6
ENSG00000099797	TECR	84.1616385826912	0.0365259264686221	0.00813508785244031	1.0093457210369472e-4	0.2580872467594706	0.9930711471988996	0.9999999913564659	5.0022660458282076e-8	5.053058973203406e-5	0.0072423626072636305	0.159784730330492
ENSG00000099800	TIMM13	134.293105726332	0.0570417954330715	0.0243036581848205	0.0015703585751815075	0.8151517875023463	0.9999993255625047	1	9.385071494616426e-6	0.03724068087211396	0.76875816501363	0.9994961397210491
ENSG00000099804	CDC34	55.7860886265398	0.0245128876151129	2.92068141622829e-4	9.846041075678436e-6	0.03902404168748885	0.7785833871459101	0.9995698355954961	4.364231198650259e-11	2.505653462492319e-10	1.3681390464981291e-9	6.954992803898108e-9
ENSG00000099810	MTAP	17.85173636377	0.00797717564291229	0.00833297246318009	4.630485639367521e-8	4.499144822933676e-5	0.006435520864733646	0.14638802408595875	5.5033428703055165e-8	5.8291903475948814e-5	0.008365520985723407	0.1774744321812367
ENSG00000099814	CEP170B	2304.61530084049	0.50935055194911	0.304988448676129	0.9999991465982805	1	1	1	0.9827779194078139	1	1	1
ENSG00000099817	POLR2E	281.531641731802	0.112543706037993	0.0550607478740956	0.08033208740290099	0.999976807903021	1	1	0.0012614290555813534	0.7766595608462719	0.999998106372531	1
ENSG00000099821	POLRMT	50.994204319383	0.0224545726371266	0.0155061971194795	6.056547554700309e-6	0.023968417198788394	0.6700667459289014	0.9980694222001179	8.788011288674014e-7	0.0026346634029643656	0.2150388346157428	0.8905898738094855
ENSG00000099822	HCN2	22.5609729161686	0.0100603609840008	0.0061154185091444	1.1984088521543868e-07	1.8185751829147279e-4	0.02508299040481854	0.36586823033277927	1.717064346262731e-8	9.731439304716538e-6	0.0012583097395465481	0.038581921357977333
ENSG00000099849	RASSF7	10.7585085357413	0.00482280286932678	0.00277354863328673	7.693650050377698e-9	2.678258552490931e-6	2.893143412584509e-4	0.009915235315749116	1.5664642916135563e-9	1.8336598517354474e-7	1.0901826354214883e-5	3.315865035256049e-4
ENSG00000099860	GADD45B	40.632229109548	0.0179738343045533	0.0148179487953826	1.8523741047715703e-6	0.006490230972063027	0.371930397139722	0.9680576378116257	7.034314980502998e-7	0.0019909146570628034	0.17766959376398428	0.85257659054169
ENSG00000099866	MADCAM1	50.8837481091507	0.0224070246447089	0.0114787571730045	5.986607842345393e-6	0.02368228968038444	0.6672635851966429	0.9980042223180998	2.1338322719888225e-7	4.0921178326158714e-4	0.05166085805752263	0.5397381311400484
ENSG00000099875	MKNK2	82.5516692721868	0.0358522548587501	0.0324273693908084	9.02135638874979e-5	0.23996625494252433	0.9911947093561398	0.9999999828549619	4.9498823595728325e-5	0.15734091765969327	0.9724328722115686	0.9999995109353733
ENSG00000099889	ARVCF	244.328341797503	0.0991460178635481	0.07614451085096	0.04144845456458934	0.9996508309990837	1	1	0.009159893475728986	0.9825165722797556	0.9999999999902046	1
ENSG00000099899	TRMT2A	16.4849644865187	0.00737092569290022	1.91491751389183e-4	3.4109096103129843e-8	2.8288247412744383e-5	0.00398066301725708	0.10114960440728227	3.1643243580958824e-11	1.2906065105511288e-10	5.236476807723989e-10	2.030702717092936e-9
ENSG00000099904	ZDHHC8	64.076604332185	0.0280536144062119	0.00436320851664048	2.1203291542870595e-5	0.07916017668811148	0.9033863976050903	0.9999751268906975	5.608626896247415e-9	1.5925318300746838e-6	1.5663090733231133e-4	0.005431894022714379
ENSG00000099917	MED15	153.593118160742	0.0647091184186439	0.060697706859298	0.0034184302277450174	0.9197779107540144	0.99999999015859	1	0.002305763258182769	0.8733500313286247	0.9999999060658227	1
ENSG00000099940	SNAP29	2852.00684310174	0.562303429653423	0.498086300657882	0.9999999650852308	1	1	1	0.999998362718164	1	1	1
ENSG00000099942	CRKL	37.1345130748463	0.0164520602825123	0.014071732261223	1.1803612925964657e-6	0.003790022886681288	0.2716270678627323	0.9297316221279202	5.481124503159407e-7	0.0014459607335313152	0.1413210907437199	0.8010729276302453
ENSG00000099949	LZTR1	496.528112036138	0.18278040629735	0.112838648209542	0.5331250595632209	0.9999999999996332	1	1	0.08139153424698875	0.9999782200274469	1	1
ENSG00000099953	MMP11	77.8116187789154	0.0338633585725645	0.00512095256666532	6.405990592639466e-5	0.18989598905566552	0.982639394599462	0.9999998766523788	9.3559443525848e-9	3.6824502382959423e-6	4.188644499631966e-4	0.01412242614212944
ENSG00000099956	SMARCB1	339.607520210966	0.132679529001765	0.0775197293102551	0.17377382980264533	0.9999997588739362	1	1	0.010189188749396894	0.9857403391328865	0.9999999999959183	1
ENSG00000099958	DERL3	195.230787261587	0.0808331809495282	0.0271564251122793	0.013045370585936689	0.9914202643175768	0.9999999999995223	1	1.758905398097088e-5	0.0671159876672025	0.8788101409540507	0.9999472288228256
ENSG00000099968	BCL2L13	913.356297276571	0.29149455428048	0.224725628778866	0.9720930791771115	1	1	1	0.7990472384520086	1	1	1
ENSG00000099974	DDTL	20.39943502621	0.00910526699270094	0.00733586975898095	7.884144503922386e-8	9.91973782260569e-5	0.014134685914228506	0.2552316773835819	3.349575317113107e-8	2.7513594091588267e-5	0.003866278217618091	0.09883973483416153
ENSG00000099991	CABIN1	45.7494656542818	0.0201917583332942	2.63830288436364e-4	3.41056434416398e-6	0.012982825117397567	0.5251651747629087	0.991330813436761	4.008704479474545e-11	2.1096535629538948e-10	1.0677053685625992e-9	5.067092301302978e-9
ENSG00000099994	SUSD2	405.635562630471	0.154490428299992	0.100189452421059	0.31754871464910983	0.9999999990254919	1	1	0.04385901715193907	0.9997143477978786	1	1
ENSG00000099998	GGT5	150.951518489938	0.0636670624906237	0.00229203745858979	0.003094187900922085	0.9093043615798029	0.9999999821563923	1	9.8206887066965e-10	8.111329530269273e-8	3.823779346823208e-6	1.0340822039889286e-4
ENSG00000099999	RNF215	99.0112603284917	0.0426954633736736	0.00931707573989368	2.6141186803674277e-4	0.4412099052329359	0.9993751139400058	0.9999999999885878	8.671572604423972e-8	1.1399643339238263e-4	0.016160910294838904	0.27864981088519314
ENSG00000100003	SEC14L2	201.758788774634	0.0833108523069384	0.0433820740609725	0.015562413718846368	0.9942204572535475	0.9999999999999071	1	2.883657886942892e-4	0.46241760020938527	0.9995323078957626	0.9999999999947432
ENSG00000100014	SPECC1L	387.9020650432	0.148741039873663	0.131929385362956	0.27632069603545495	0.9999999956129098	1	1	0.16954109823198782	0.999999711420969	1	1
ENSG00000100023	PPIL2	345.962599021123	0.1348276078354	0.109328377978473	0.18619493556961086	0.9999998563964847	1	1	0.06936989567477692	0.9999543854658322	1	1
ENSG00000100024	UPB1	722.458906299229	0.245528970600944	0.207774005970953	0.8824876251582662	1	1	1	0.7060861275476349	0.9999999999999998	1	1
ENSG00000100029	PES1	140.881603314859	0.0596733030225023	0.0305753001100251	0.0020757317450844637	0.8586687327486592	0.9999998354265083	1	3.498880707053509e-5	0.1202797361498974	0.9517237540289848	0.9999972833846223
ENSG00000100031	GGT1	1015.87390044105	0.313941127403817	0.073144134544385	0.9876723910564825	1	1	1	0.007199835976632429	0.9731266193217344	0.9999999999359132	1
ENSG00000100034	PPM1F	2783.91023891965	0.556346957878425	0.1194574972733	0.9999999494481325	1	1	1	0.10758972391032406	0.999994854375228	1	1
ENSG00000100036	SLC35E4	129.763119813789	0.0552239154319831	0.0345294197697759	0.0012847862475058314	0.780018619692425	0.9999982590185916	1	7.197558828819783e-5	0.20605437719774056	0.9861022233533249	0.9999999357716407
ENSG00000100038	TOP3B	249.407052933405	0.100998761073892	0.0122379548243813	0.04579656421392164	0.9997558497264104	1	1	2.8510386784752484e-7	6.082654449020009e-4	0.07204142693584414	0.6277178259140077
ENSG00000100055	CYTH4	115.420905595118	0.049421885930111	0.0470007105591067	6.453840228254348e-4	0.6406487264181829	0.9999691684861267	0.9999999999999957	4.7283132057940325e-4	0.5719695885451488	0.9999049785298828	0.9999999999999211
ENSG00000100056	DGCR14	669.737825768281	0.231764217430424	0.148278891489994	0.8309855034431638	1	1	1	0.2730920114810147	0.9999999950566039	1	1
ENSG00000100060	MFNG	103.573879189894	0.0445752468288224	0.0444549026794053	3.408378454479166e-4	0.4991064125030311	0.9997200818290793	0.9999999999986557	3.352023847358332e-4	0.4954221615507519	0.9997050443418736	0.9999999999984561
ENSG00000100068	LRP5L	259.958810856922	0.104823842121433	0.104801966654877	0.05578188173122911	0.9998854309580039	1	1	0.055720799987910574	0.9998849263820813	1	1
ENSG00000100075	SLC25A1	213.627296121157	0.0877814349229429	0.00701041067006439	0.02103640108852234	0.997254562758573	0.9999999999999954	1	2.822876277175368e-8	2.1151146412656807e-5	0.002926826795288995	0.07899067515316505
ENSG00000100077	ADRBK2	31.8795696811841	0.0141568714909996	0.0138189267870919	5.641921105858927e-7	0.001501025718266047	0.14523712868479077	0.8075140327501085	5.02662432677603e-7	0.0012922751943944544	0.13005353252817897	0.7810777540079483
ENSG00000100079	LGALS2	7357.66048560535	0.768210618518319	0.324377555184027	0.9999999999999765	1	1	1	0.9917653082346116	1	1	1
ENSG00000100083	GGA1	350.229216221349	0.13626380636052501	0.00530806680672397	0.1947424649311128	0.9999998987676837	1	1	1.0541673312047806e-8	4.466239387213022e-6	5.229896497056519e-4	0.0173989085003059
ENSG00000100092	SH3BP1	939.021344771957	0.297250712258085	0.0108037390400185	0.9772137450529055	1	1	1	1.6315264161903542e-7	2.8159691705886836e-4	0.037280536659289765	0.457258612668344
ENSG00000100095	SEZ6L	50.0005856732421	0.0220266840408822	0.0225418512859929	5.451805933587295e-6	0.02148537109739035	0.6444083111480221	0.9974033080160972	6.186765866278421e-6	0.024500399547550233	0.6751799776638354	0.9981839328209433
ENSG00000100097	LGALS1	213.300115678571	0.0876587784236752	0.0412891590520375	0.020868979128019327	0.9971964403995912	0.9999999999999951	1	2.1283720419562613e-4	0.3978503141902303	0.9988836065399014	0.9999999999454046
ENSG00000100099	HPS4	308.614695350563	0.122048921062597	0.0422635390060382	0.11911911454889235	0.9999971237143732	1	1	2.4558000686902837e-4	0.4278669516240243	0.9992517776743093	0.9999999999814835
ENSG00000100100	PIK3IP1	269.729410903631	0.108336837618725	0.00624477758975709	0.06620400260494552	0.9999439829142244	1	1	1.8498337084338345e-8	1.0944069541718449e-5	0.0014326515189557743	0.043218842290429715
ENSG00000100104	SRRD	87.2236770569814	0.0378046038294133	0.0249647366054355	1.243100043963885e-4	0.29385539917339865	0.99566046463694	0.9999999976958039	1.0908701791212394e-5	0.04308488229275831	0.7988400804749767	0.9996955304584718
ENSG00000100105	PATZ1	16.0503537523739	0.00717799298456737	0.00440927542901169	3.0846660004080206e-8	2.424711968718185e-5	0.0033838492810515097	0.08885251891576251	5.7941398345917605e-9	1.6805862704805108e-6	1.669925543545947e-4	0.00578896590681377
ENSG00000100106	TRIOBP	804.963552620128	0.266106860005931	0.13845167046684	0.9356682117350509	1	1	1	0.20812491037189984	0.9999999408519338	1	1
ENSG00000100109	TFIP11	2845.08366753915	0.561705167038518	0.530975068601977	0.9999999637587461	1	1	1	0.9999997625627506	1	1	1
ENSG00000100116	GCAT	2547.42287661331	0.53433960916489	0.136962603971903	0.9999998060557802	1	1	1	0.19897000248844532	0.9999999146806304	1	1
ENSG00000100124	ANKRD54	839.319075245144	0.274348328697257	0.225928924233106	0.9504133230284206	1	1	1	0.8047847744310023	1	1	1
ENSG00000100139	MICALL1	77.7169012480716	0.0338235320486425	0.0012352828790518	6.361130497289924e-5	0.18895040336051716	0.9824096932897072	0.9999998717788886	2.763249629111897e-10	8.321704658698081e-9	1.8507979715476353e-7	3.044096622550896e-6
ENSG00000100147	CCDC134	571.160180151202	0.204631817339935	0.0195102477963961	0.6864517319029577	0.9999999999999994	1	1	2.842540917424863e-6	0.010602373010304422	0.4783217694007771	0.9868148922091192
ENSG00000100150	DEPDC5	80.0190197084829	0.034790590435476	0.00130923466897151	7.530101673147716e-5	0.2125631879629527	0.9872804129543424	0.999999950386253	3.068333365163767e-10	1.0077220058413161e-8	2.4002145782020534e-7	4.152837000392928e-6
ENSG00000100151	PICK1	1681.25627659752	0.43095253359357	0.362377591738591	0.9999366316389536	1	1	1	0.9983153207871034	1	1	1
ENSG00000100154	TTC28	423.87280424127	0.160322691606532	0.00476514640142658	0.36100100775138333	0.9999999997955488	1	1	7.401968371567591e-9	2.514201544956407e-6	2.686794476353116e-4	0.009230275812672106
ENSG00000100162	CENPM	34.9378124416474	0.0154939139557985	0.00812181872207848	8.753697660068838e-7	0.0026218339243755384	0.21434183851688582	0.889986257474502	4.970089428901758e-8	5.0043607510930066e-5	0.007171598820334468	0.15863411980808262
ENSG00000100181	TPTEP1	798.920324457114	0.26463776403267	0.26351354091659	0.9326879498593423	1	1	1	0.9303305282429272	1	1	1
ENSG00000100197	CYP2D6	2152.44706331636	0.492275156713687	0.160971237000954	0.9999977179218451	1	1	1	0.36590961758518714	0.9999999998285083	1	1
ENSG00000100201	DDX17	239.504636245951	0.0973792172278713	0.0158739296222069	0.03758661514277639	0.9995115205938296	1	1	9.87032067301108e-7	0.0030433721042254502	0.2363768573489361	0.9074809422662059
ENSG00000100207	TCF20	32.1591323869058	0.0142792451583217	0.00766421339663842	5.880124305246426e-7	0.0015832215946124384	0.1509717789003685	0.8165145522413614	3.961948991104691e-8	3.5540105835507596e-5	0.005049795772595345	0.12179052226140707
ENSG00000100216	TOMM22	16.9896860253974	0.00759488795658422	1.54119053134658e-4	3.825398875445529e-8	3.3695520872178975e-5	0.004778226473568958	0.1166996456980347	2.7639668331858047e-11	9.63297219769288e-11	3.414256655176473e-10	1.1692457002610013e-9
ENSG00000100219	XBP1	505.842644479473	0.185572944022992	0.0507917427675617	0.5540249312284768	0.9999999999998382	1	1	7.646220152512928e-4	0.6770590826557998	0.9999840118513581	0.9999999999999992
ENSG00000100220	RTCB	30.8306368352127	0.0136974485466229	0.0124652088758526	4.819991503701715e-7	0.0012234259043583107	0.12483273302562892	0.7710068393564588	3.1021569213418587e-7	6.817519629275237e-4	0.07906253262922935	0.6525278504243945
ENSG00000100221	JOSD1	163.007657623315	0.0684041686151734	0.00597975980231677	0.004799618829218089	0.9492322571831566	0.9999999988636478	1	1.5864148328326166e-8	8.586143633859677e-6	0.0010948750718786648	0.03411822914104068
ENSG00000100225	FBXO7	169.063510506256	0.0707655990570258	0.0716678104941405	0.005897716368659989	0.9627712448650118	0.9999999997247859	1	0.0063672122049084345	0.9670490250186512	0.9999999998411208	1
ENSG00000100226	GTPBP1	18.5466875954526	0.00828514665261444	0.0018143731782796	5.378527756505491e-8	5.632798147792162e-5	0.008082155438239758	0.17310900079667113	5.831295446512286e-10	3.215779376120054e-8	1.1368115202525786e-6	2.584749491063576e-5
ENSG00000100227	POLDIP3	51.8105429732029	0.0228058378958822	0.019712292698027	6.5954560867220735e-6	0.02616357781102141	0.6903864784125238	0.9984926772769133	3.001716343042915e-6	0.01126896751900508	0.4922885377336652	0.9883367311274686
ENSG00000100228	RAB36	48.0621604647207	0.0211908479857858	0.00329134544801893	4.4193824981775265e-6	0.017203573066581268	0.591711995872678	0.9954421823099057	2.464773718457991e-9	3.9984183675123575e-7	2.9071221831822314e-5	9.568546923197641e-4
ENSG00000100239	PPP6R2	117.58792265929	0.0503031015515855	0.027260788505907	7.201257771408676e-4	0.6642972686465081	0.9999797591627017	0.9999999999999986	1.7980056172595127e-5	0.06844894061986895	0.8818970281960471	0.9999516012267124
ENSG00000100241	SBF1	94.7804465391509	0.0409457608305176	0.0147449245698087	2.0222252391366435e-4	0.38732424768419327	0.998717191406696	0.9999999999203613	6.867289980005964e-7	0.001931030623181118	0.17391465773843873	0.8480227297849953
ENSG00000100243	CYB5R3	286.730550027589	0.114384272383976	0.106570800930918	0.08709312370192457	0.999984362158664	1	1	0.06081128190543683	0.9999195381464452	1	1
ENSG00000100258	LMF2	53.0603084720875	0.0233431151273561	0.00959595907987665	7.499771790930865e-6	0.029807790166850534	0.7200840556549122	0.9989749804702237	9.809119183579185e-8	1.363365450739451e-4	0.019162383841253683	0.3105747920372811
ENSG00000100263	RHBDD3	50.3448870232299	0.0221749952225275	0.0156763645247573	5.655221802736143e-6	0.02232282902997884	0.6534104611372353	0.9976553633474571	9.2754234382042e-7	0.0028177809544658317	0.2248011058828111	0.8986865246907509
ENSG00000100266	PACSIN2	117.355298361549	0.0502085833693378	0.0413887500331036	7.117755692316319e-4	0.6617991886796317	0.9999788186901268	0.9999999999999983	2.1600309070068935e-4	0.4009093944243287	0.9989279186812583	0.9999999999510838
ENSG00000100271	TTLL1	60.9027064544313	0.0267011417374755	0.0268049249877944	1.596786924396021e-5	0.0615071632105848	0.8646090902646525	0.9999232825793476	1.6325597319344354e-5	0.06275637996292449	0.8679528687941471	0.9999295226841288
ENSG00000100280	AP1B1	96.5667014938596	0.0416852670081063	0.0258159530511874	2.2566788352584854e-4	0.41003149577164444	0.9990502201035555	0.9999999999647609	1.318163583219345e-5	0.05154181560113369	0.8334412378444106	0.9998435660020176
ENSG00000100281	HMGXB4	32.1574807891766	0.0142785222896173	0.0108509740527477	5.878692276306552e-7	0.0015827252933011682	0.15093753894506068	0.8164622748952147	1.663041755417538e-7	2.892597938564112e-4	0.03817953165071075	0.4630910328224316
ENSG00000100284	TOM1	1111.10374118478	0.333554229322678	0.100730694318761	0.9942927978370324	1	1	1	0.045148164392007306	0.9997427868020053	1	1
ENSG00000100285	NEFH	213.609623435619	0.0877748104620241	0.0463487258334635	0.021027332926559672	0.9972514526332021	0.9999999999999954	1	4.3369539670434776e-4	0.5527008258471409	0.9998723524397563	0.9999999999998295
ENSG00000100290	BIK	104.52786364136	0.04496735241436	0.0424626813145898	3.5976085868649754e-4	0.5110761372419197	0.9997641606271906	0.9999999999991451	2.527748440365185e-4	0.43401769803356616	0.9993112647252672	0.9999999999851815
ENSG00000100292	HMOX1	249.023195714865	0.100858994013122	0.00513420390860027	0.045457673453795255	0.9997491200860019	1	1	9.436140646634783e-9	3.7337499596556967e-6	4.256091625338687e-4	0.014337342092348937
ENSG00000100296	THOC5	73.5506153523593	0.0320684509249689	0.0138796859120855	4.6340430617797246e-5	0.14971465822243013	0.9691714717179322	0.9999993143644521	5.13279411640255e-7	0.001327906033622761	0.13271206887382958	0.7860022290590477
ENSG00000100297	MCM5	623.190364608406	0.219186999353186	0.00111899643072192	0.7711531155192746	1	1	1	2.327160686377283e-10	6.071576907906717e-9	1.2038186625318303e-7	1.8155250166573822e-6
ENSG00000100298	APOBEC3H	443.590131408834	0.166538434790719	0.021321562966193	0.4084716696048625	0.9999999999627265	1	1	4.5687195255883495e-6	0.01782583016932282	0.6001568947726433	0.9958199720991625
ENSG00000100299	ARSA	2210.73385896766	0.498954333375995	0.418431636353391	0.9999984423202226	1	1	1	0.9998803558675693	1	1	1
ENSG00000100300	TSPO	114.768898764556	0.0491564277840456	0.0438457987438	6.241945473884902e-4	0.6333723530959368	0.9999650415445493	0.9999999999999941	3.0787754453120986e-4	0.47671312918026776	0.9996163339612375	0.999999999996898
ENSG00000100304	TTLL12	929.918165693299	0.295219785650725	0.271184043540499	0.9755109057789912	1	1	1	0.9451320821602213	1	1	1
ENSG00000100307	CBX7	43.6888246724474	0.0192998367073571	0.0132769777543492	2.6845691410981587e-6	0.009941610163195502	0.46373090487315294	0.9850413103294829	4.159976525475173e-7	0.001008296918061924	0.10774197177897593	0.7338504744453536
ENSG00000100311	PDGFB	927.498119627433	0.294677894751918	0.286637022294732	0.9750379333735755	1	1	1	0.9670105654004489	1	1	1
ENSG00000100316	RPL3	76.9527634197419	0.033502109684299	0.0141849849470548	6.008858821759944e-5	0.1814061656301107	0.9804539994857381	0.9999998248992582	5.695898483981665e-7	0.0015195873738531596	0.1465435477322311	0.8096085977756149
ENSG00000100319	ZMAT5	22.9247318904966	0.0102209100307945	0.00175918015513944	1.282542135827569e-7	0.00020035140167695697	0.02742003297476059	0.3854241147638554	5.464708685565256e-10	2.86270123162069e-8	9.743293634123518e-7	2.161334929651204e-5
ENSG00000100321	SYNGR1	1829.32916445318	0.45176104242447	0.333479563651549	0.999978686975621	1	1	1	0.9942754966841266	1	1	1
ENSG00000100325	ASCC2	92.5363073832121	0.0400150722337947	0.00753821597763711	1.7569591302668552e-4	0.35901868518853963	0.9981409211135547	0.9999999997805036	3.7167259381298834e-8	3.224946980062704e-5	0.004565128047745337	0.11263528409216084
ENSG00000100330	MTMR3	245.842587818984	0.0996992220969098	0.0656915069934491	0.04271429650713354	0.9996860179231303	1	1	0.003749058486690493	0.9287254707694086	0.9999999944154706	1
ENSG00000100336	APOL4	656.951736228066	0.228349933005615	0.226020296793258	0.8159807497434044	1	1	1	0.805215758785915	1	1	1
ENSG00000100342	APOL1	224.335039423479	0.0917775328689763	0.089196682961384	0.027069568414773038	0.9986342420484223	0.9999999999999997	1	0.023042817506688795	0.9978485967689722	0.9999999999999983	1
ENSG00000100346	CACNA1I	70.1213757768837	0.030619065224478	0.0285164498686729	3.52837347039614e-5	0.12108908403806284	0.9523356850835222	0.9999973890746509	2.3306162426961485e-5	0.08589771218840603	0.9144091870046007	0.9999832526089547
ENSG00000100347	SAMM50	675.328835652962	0.233247715194554	0.230340210864945	0.837221622450643	1	1	1	0.824838455187392	1	1	1
ENSG00000100348	TXN2	188.945759749386	0.0784350411314543	0.0412560626836668	0.010923394503832728	0.9875780231553457	0.9999999999977319	1	2.1179390662684483e-4	0.3968343006752145	0.9988685017283475	0.9999999999433767
ENSG00000100350	FOXRED2	1866.71543901298	0.456776466791097	0.391102720363762	0.9999837085411716	1	1	1	0.999546758288533	1	1	1
ENSG00000100351	GRAP2	46.8765692232542	0.0206789244106557	0.0194157235066072	3.874341334086928e-6	0.014926086255142579	0.5580140277388927	0.9936377245377209	2.7706094938295678e-6	0.01030138180817175	0.4717717138688051	0.9860430711149756
ENSG00000100353	EIF3D	94.7853529423186	0.0409477936353093	0.0338294815832573	2.0228400455346573e-4	0.3873864489035507	0.9987182419893311	0.9999999999205387	6.367814776997438e-5	0.18909151067330943	0.9824441795768311	0.9999998725187251
ENSG00000100359	SGSM3	28.8604649328755	0.0128333728939189	0.00596007253096408	3.549141101011344e-7	8.166356467658176e-4	0.09136719682897954	0.6909006050958568	1.568158081166615e-8	8.430021431582446e-6	0.0010727049472685213	0.03350335382485281
ENSG00000100360	IFT27	542.694875925134	0.196436776516409	0.189234733289839	0.6320705334557413	0.9999999999999937	1	1	0.580970504635162	0.9999999999999453	1	1
ENSG00000100362	PVALB	1636.8156355263	0.424395612911619	0.411333472871802	0.9999114364660746	1	1	1	0.9998296461931271	1	1	1
ENSG00000100364	KIAA0930	464.555396666111	0.173047424256185	0.164190817103662	0.4587067121462044	0.9999999999939759	1	1	0.39044527379709704	0.9999999999287915	1	1
ENSG00000100365	NCF4	10.4488719479453	0.00468464983858604	0.00357422338270737	7.009880675923341e-9	2.2996916482220797e-6	2.419738044234787e-4	0.008337291966077687	3.103608259280577e-9	5.915179408511051e-7	4.719863747704167e-5	0.0015953786834442818
ENSG00000100368	CSF2RB	58.965978219935	0.0258740054847122	0.0192736729519146	1.3350523896282773e-5	0.05215814096700211	0.8356335132043529	0.9998506155558993	2.6654660760794258e-6	0.009861775288122154	0.4619142385895082	0.9848063687579437
ENSG00000100372	SLC25A17	47.1431601239914	0.0207940817118109	0.00705027730619822	3.9915982756877355e-6	0.015416778846175982	0.5656751058104894	0.9940932169257023	2.8834043375169927e-8	2.185488979289385e-5	0.003030662189516198	0.08126817771106842
ENSG00000100373	UPK3A	1937.49564628463	0.466024696385692	0.405397443172642	0.9999901326559991	1	1	1	0.9997719797083485	1	1	1
ENSG00000100376	FAM118A	7467.48359141641	0.770838321525826	0.71675354522411	0.9999999999999807	1	1	1	0.9999999999989592	1	1	1
ENSG00000100380	ST13	129.890294859343	0.0552750463047118	0.0230745141769809	0.0012921794091835803	0.7810642613281885	0.9999983043343524	1	7.0351387173595015e-6	0.027941687330546583	0.7054515282074715	0.9987557201560658
ENSG00000100393	EP300	37.734071410331	0.0167132488667099	0.00562862031314689	1.2778703508686817e-6	0.004173160022707623	0.288158323588122	0.9382226620779962	1.2859034614898235e-8	6.1456725370945264e-6	7.521810072215196e-4	0.024332626264574886
ENSG00000100395	L3MBTL2	87.5952720371297	0.0379595473688942	0.0112373318081729	1.2743443672880161e-4	0.2982989529032617	0.9959043369291662	0.9999999980406706	1.940874905237422e-7	3.5887182291349795e-4	0.04613103856160239	0.5105271304737691
ENSG00000100401	RANGAP1	29.2590011951135	0.0130082845859757	0.00791728463224061	3.780113717599676e-7	8.881810023099179e-4	0.09762067665774199	0.7082810251283991	4.495700367534994e-8	4.3031842717478064e-5	0.006149093805742023	0.1414781560346502
ENSG00000100416	TRMU	30.0288979423703	0.013346005453455	0.0085285902223384	4.2626824570124455e-7	0.0010412614584471847	0.11044299287860049	0.7401924002406711	6.039600286555924e-8	6.695021462110873e-5	0.009607853455097737	0.19590946245301422
ENSG00000100417	PMM1	197.721591227841	0.0817801321480642	0.0399300450262788	0.013966792580347498	0.9926115789305704	0.9999999999997436	1	1.7342808465070636e-4	0.3564526382634615	0.9980776106668151	0.9999999997593687
ENSG00000100418	DESI1	424.183135268102	0.160421239213861	0.0275360853581011	0.3617460480185346	0.9999999998009325	1	1	1.904765540428066e-5	0.07205056977406166	0.8897464136893269	0.9999615235765003
ENSG00000100422	CERK	625.69065852248	0.219873040890308	0.216158515834099	0.7747405324864063	1	1	1	0.754871926406329	1	1	1
ENSG00000100425	BRD1	29.0085256700555	0.0128983618065267	7.34805949284705e-4	3.6335066366799396e-7	8.426307694081592e-4	0.09365989688178666	0.6974245030188829	1.2174328212211094e-10	1.819818851167554e-9	2.2755920370265414e-8	2.3762037637542477e-7
ENSG00000100426	ZBED4	103.495898534882	0.0445431810747517	0.00829450725436985	3.3932846955730955e-4	0.49812519184348314	0.9997161482473721	0.9999999999986052	5.402767344619974e-8	5.670782278799358e-5	0.008137005883273596	0.1739589480697069
ENSG00000100427	MLC1	105.972256720044	0.0455604130332491	0.0213571929263398	3.9007286181313994e-4	0.5290628230923953	0.9998184495258486	0.9999999999995708	4.610173222285852e-6	0.01799840353053561	0.6024465496117242	0.9959177918874055
ENSG00000100429	HDAC10	11.8878379816467	0.00532635994486048	5.83164004506104e-4	1.066392352200296e-8	4.550067017161652e-6	5.34250449080842e-4	0.017748156483068378	8.982081745045889e-11	1.023582107961829e-9	1.0151393059487646e-8	8.72412619923324e-8
ENSG00000100439	ABHD4	37.4778310742609	0.0166016385890383	0.0190371774027612	1.2353865924685792e-6	0.004005756053749088	0.2810518601635277	0.9347055190424364	2.4980454975676025e-6	0.009162905397972376	0.4454797435061689	0.9825273367499092
ENSG00000100441	KHNYN	1070.86497744719	0.325405321939974	0.238066687866397	0.992092282636017	1	1	1	0.8563150829835687	1	1	1
ENSG00000100445	SDR39U1	148.215220865512	0.0625851989969661	0.0255903814168141	0.0027846888809568426	0.8972917082584764	0.9999999671217413	1	1.2542776221868834e-5	0.04919556825128868	0.8247213435213079	0.9998130256600598
ENSG00000100448	CTSG	259.555367426352	0.104678189822297	0.0418673536817981	0.05537606082210145	0.9998820309207596	1	1	2.317836581172683e-4	0.41564215142836825	0.9991186548486812	0.9999999999712083
ENSG00000100450	GZMH	15.9928491737331	0.00715245989254524	0.00312874965402598	3.043517327050438e-8	2.3751598611676528e-5	0.003310671742513871	0.08730098059908764	2.147812816488681e-9	3.1596313021520217e-7	2.1665998836573053e-5	6.98813370495377e-4
ENSG00000100453	GZMB	17.0645785237326	0.0076281117172727	0.00219250374931333	3.8903382515442786e-8	3.4568962505865386e-5	0.004906857448148894	0.11912308894130996	8.857535815920414e-10	6.761600612747998e-8	3.018078375549571e-6	7.914008364673375e-5
ENSG00000100461	RBM23	295.831643587772	0.117588012831372	0.0824580930376128	0.09971746206342746	0.9999922166191897	1	1	0.014656998960404954	0.9933691105746492	0.9999999999998361	1
ENSG00000100462	PRMT5	595.479067244594	0.211501862745997	0.0932215745561094	0.7284389051846916	0.9999999999999999	1	1	0.029540291070636493	0.9989465592577299	0.9999999999999999	1
ENSG00000100478	AP4S1	37.5687465115741	0.0166412414105333	0.00354657439716719	1.2503197459601267e-6	0.004064518278161011	0.2835663897990245	0.9359721677707711	3.0359170732907614e-9	5.698429527134508e-7	4.507878936699239e-5	0.0015204586800033892
ENSG00000100479	POLE2	22.701685526341	0.0101224722275148	9.62105809519387e-4	1.230383214201325e-7	1.888313875778591e-4	0.025968658245729692	0.3734134384489276	1.8166623760862421e-10	3.842461127057106e-9	6.420904663517746e-8	8.478004166478925e-7
ENSG00000100483	VCPKMT	196.031546045128	0.081137825524678	0.06807151726828	0.013336467026068388	0.9918214391760151	0.9999999999996088	1	0.004659234607632734	0.9470230091571917	0.9999999986156722	1
ENSG00000100485	SOS2	34.0823277402996	0.0151202674901706	0.00957821419246978	7.7634872630572e-7	0.0022554409888670968	0.19365233993589948	0.8703471138542042	9.733155936775262e-8	1.348112883217123e-4	0.018959569245029617	0.30851053124080907
ENSG00000100490	CDKL1	98.1097773799604	0.0423231800052406	0.0128420313989326	2.4771624856956276e-4	0.42970873501856177	0.9992700858719992	0.9999999999826775	3.5602833814429857e-7	8.200595701087776e-4	0.09167055459964324	0.6917742512726752
ENSG00000100504	PYGL	104.777489066737	0.0450699000482832	0.0420763098551361	3.648543487195788e-4	0.5141970592289133	0.9997745440958882	0.9999999999992408	2.3897541200579298e-4	0.4220873196498186	0.9991914344540469	0.9999999999771815
ENSG00000100505	TRIM9	418.057871816323	0.158471835012659	0.141770605887081	0.34706795969161464	0.999999999663135	1	1	0.22921957331075538	0.9999999741032142	1	1
ENSG00000100519	PSMC6	203.218284101748	0.0838629707587726	0.00485685289626572	0.016171304371071393	0.9947166453392774	0.9999999999999357	1	7.870267326737235e-9	2.7794179382478745e-6	3.021221812242736e-4	0.010338230260154013
ENSG00000100523	DDHD1	42.5243997860836	0.0187951121278976	0.0107178216283876	2.336155470294976e-6	0.008488834069019457	0.42865325131712095	0.9798819877609248	1.5755047277909995e-7	2.6810090500772876e-4	0.03568495071419564	0.44664267152489623
ENSG00000100528	CNIH1	32.3809436605397	0.0143763175370835	0.0139781315867289	6.075169860508822e-7	0.001651054941423702	0.15560894324021457	0.8234391132830873	5.308901337430783e-7	0.0013873754222218926	0.13708620255730453	0.7938215264282894
ENSG00000100554	ATP6V1D	115.672637597819	0.0495243364741326	0.0311003272761239	6.537224535908548e-4	0.6434385412613152	0.9999706318315346	0.9999999999999962	3.867084290043454e-5	0.13020324943026662	0.9586389134787859	0.9999983169089579
ENSG00000100564	PIGH	28.0659367386235	0.0124844811177292	0.0121661874678345	3.124296656942249e-7	6.8831385196233e-4	0.07967798798676606	0.654593937165826	2.775439685853698e-7	5.864957566896756e-4	0.06991398840644758	0.6197186411751021
ENSG00000100568	VTI1B	81.8682263043133	0.0355659917317483	0.0226164819650192	8.596278986650052e-5	0.23243322350821927	0.9902650213325199	0.999999977120157	6.3000240815291875e-6	0.024962294280921227	0.6795187685905246	0.9982767602760635
ENSG00000100577	GSTZ1	461.27273695949	0.172034993158721	0.107379718157557	0.4508896270888858	0.9999999999919805	1	1	0.06324251082038379	0.9999317950464014	1	1
ENSG00000100578	KIAA0586	13.1695665168375	0.00589725326473019	0.00504105873233475	1.5110618756253302e-8	7.948129705614981e-6	0.001004459505418831	0.03159575946583748	8.88417672761932e-9	3.385859239313227e-6	3.8008879392004147e-4	0.012879246133892575
ENSG00000100580	TMED8	199.894327803123	0.0826045689295016	2.39249146955719e-5	0.014809538196819627	0.9935230986731701	0.9999999999998513	1	1.546585082223828e-11	2.184652458936398e-11	3.4322100717076864e-11	5.610800712929631e-11
ENSG00000100592	DAAM1	100.704430779381	0.0433939063690072	0.0425560973916589	2.8885024003000304e-4	0.46278275289071225	0.9995346543770385	0.9999999999948133	2.5621124841945786e-4	0.4369037504777884	0.9993375975196631	0.9999999999866548
ENSG00000100596	SPTLC2	458.532909821197	0.171188081408268	0.142961427299474	0.44434795371589775	0.9999999999898195	1	1	0.2370094092835915	0.9999999808044658	1	1
ENSG00000100599	RIN3	91.5185358574524	0.0395923867525915	0.0298163003609326	1.6466717819763055e-4	0.3463014602820149	0.9978056848245199	0.9999999996537443	3.0201225805992493e-5	0.10676275434217064	0.9399994735830112	0.9999946293995304
ENSG00000100600	LGMN	59.4457062353261	0.0260790182774325	0.0259886600772997	1.3961990037780758e-5	0.0543760406880589	0.843207044055707	0.999873152819056	1.3689575091069273e-5	0.053390547184160586	0.8399013278488534	0.9998636539350886
ENSG00000100601	ALKBH1	142.660388440117	0.0603812503642578	0.0514603316220035	0.002232561224122409	0.868945241991182	0.9999998882227745	1	8.292339356665845e-4	0.6940934826002276	0.9999884545387933	0.9999999999999997
ENSG00000100603	SNW1	75.7536875580081	0.0329973062739964	0.0178889614091644	5.489457755480931e-5	0.16987672666471831	0.9769895291198737	0.9999997155197615	1.8077090655488348e-6	0.006307366824038763	0.3661325546894375	0.9665425675232348
ENSG00000100605	ITPK1	113.537760579684	0.0486547775217828	0.0418170894567333	5.857514923448548e-4	0.6194394077432531	0.9999557398195597	0.9999999999999891	2.3008147937986223e-4	0.4140927669509119	0.9991002450257619	0.999999999969555
ENSG00000100612	DHRS7	62.1784775736732	0.0272452300224035	0.0306649082501758	1.7921294273470778e-5	0.06824909820077729	0.8814407517178428	0.9999509722998351	3.559495879212893e-5	0.12194034879395121	0.9529695549622428	0.9999974954870108
ENSG00000100614	PPM1A	19.6653166695409	0.00878047113699286	0.00997031266131235	6.79444733808765e-8	7.97084318576724e-5	0.011417613523748704	0.22095475151051158	1.153307402912418e-7	1.7213797801585162e-4	0.02383950445821248	0.3549817937362244
ENSG00000100628	ASB2	67.6966552000203	0.0295916222310957	0.0259523965428389	2.8897170703312547e-5	0.10295020836195379	0.9361004142464091	0.99999344482561	1.3581543798935058e-5	0.052998574550762734	0.8385603575362331	0.9998596529374991
ENSG00000100629	CEP128	344.546915872039	0.134350014710057	0.132466189138834	0.18339525838248838	0.999999838779709	1	1	0.17256445594720904	0.9999997462161985	1	1
ENSG00000100644	HIF1A	14.0932710007625	0.00630827333115301	0.00643342616206532	1.918054814975534e-8	1.1585552120219056e-5	0.0015253234557344175	0.04563537131106321	2.058650638847581e-8	1.2945514868967223e-5	0.0017226253859869978	0.050677395836927985
ENSG00000100647	KIAA0247	39.2152431578058	0.0173579048196368	0.017158870488131	1.5487417364123957e-6	0.00525500861178374	0.33029705884066896	0.95556743684384	1.4602851030609543e-6	0.004899242565166939	0.3171049254418471	0.9507218955850592
ENSG00000100664	EIF5	152.131439671995	0.064132803573916	0.0526866663259424	0.003235839495955739	0.914114548811339	0.9999999863128379	1	9.596920901649986e-4	0.7239949763926433	0.999993698708343	0.9999999999999999
ENSG00000100697	DICER1	103.972554356477	0.0447391489893339	0.0271967300750315	3.4864229171460703e-4	0.504116502955661	0.9997393882141927	0.9999999999988872	1.7739179757891854e-5	0.06762866908750298	0.8800096212958899	0.9999489607824279
ENSG00000100711	ZFYVE21	30.5528342756164	0.0135757018499192	0.00400361400677435	4.620254160370152e-7	0.0011575259870645338	0.11972736222810343	0.7606133479909276	4.3192381893319975e-9	1.0313183912424861e-6	9.298193514029052e-5	0.0032126830206903323
ENSG00000100714	MTHFD1	122.946724849717	0.052475254151416	0.026035246310958	9.360488511581666e-4	0.7189675821242685	0.9999929999884563	0.9999999999999999	1.3829446224411512e-5	0.053897068000173354	0.8416119993310238	0.9998686334672692
ENSG00000100721	TCL1A	45.456150933724	0.0200648999165086	0.0208026036291476	3.2979758523010716e-6	0.012510776397862355	0.5165110629815315	0.9906157569232856	4.000396005565676e-6	0.015453581366550173	0.5662402887916825	0.9941257005790861
ENSG00000100726	TELO2	436.255748230281	0.164237102741682	0.130369185281253	0.3907997485864957	0.9999999999296909	1	1	0.16091519067667193	0.999999581627725	1	1
ENSG00000100731	PCNX	398.385256065959	0.152149213009441	0.15385544502872	0.30053700302017183	0.9999999981940524	1	1	0.31290705466020496	0.9999999988473459	1	1
ENSG00000100744	GSKIP	229.500671295843	0.0936928387018696	0.0756656548615403	0.03038172407913753	0.9990329430780697	0.9999999999999999	1	0.008821507433164788	0.9812492477101811	0.9999999999867418	1
ENSG00000100749	VRK1	91.817533042469	0.0397166003502156	0.0390832229846316	1.6784499793831564e-4	0.3500282474926565	0.9979096569732822	0.9999999996970639	1.5217235181097521e-4	0.33112482634431206	0.9973267765161309	0.9999999994027127
ENSG00000100767	PAPLN	82.6568154793325	0.0358962807326224	0.00254478014319875	9.088304494664357e-5	0.24113386767760425	0.9913302676473147	0.9999999836013462	1.2626574230623078e-9	1.2601743704099277e-7	6.751672227744976e-6	1.9538966609711217e-4
ENSG00000100784	RPS6KA5	125.356864025516	0.0534489509670423	0.00782825834706987	0.0010491429541258368	0.741670072168759	0.9999956984424344	1	4.3014489858883564e-8	4.025483486569392e-5	0.005742362625587472	0.1343560616520526
ENSG00000100804	PSMB5	170.29157165197	0.0712430122214248	0.0663939996075788	0.006142549469393632	0.9650913811944848	0.9999999997941095	1	0.004001128662774911	0.9346042444967785	0.9999999962881321	1
ENSG00000100811	YY1	28.18736877517	0.0125378200974978	0.0101511689470834	3.1862780447422523e-7	7.067529491888713e-4	0.08139778503719908	0.6602801033547786	1.2453990305694163e-7	1.9212977301263923e-4	0.026385679779842963	0.37690852101206873
ENSG00000100814	CCNB1IP1	372.165758735791	0.143573287117757	0.113502791911492	0.2410553182853874	0.9999999835521987	1	1	0.08381062221166569	0.9999811018603209	1	1
ENSG00000100815	TRIP11	72.0203356778836	0.0314222062329927	0.0259592925190278	4.108929830803909e-5	0.13651700609310424	0.9624420398547409	0.9999987486469133	1.3602030481396632e-5	0.05307295755215402	0.8388159916113862	0.999860422349917
ENSG00000100823	APEX1	12.9643128194374	0.00580587551041874	0.00362326515821387	1.4310868157174639e-8	7.289690258205361e-6	9.11708844469783e-4	0.028965699153082336	3.2266301852601487e-9	6.317074554562652e-7	5.1170087577490087e-5	0.0017358156810626246
ENSG00000100836	PABPN1	32.468435995857	0.0144146019881971	0.0086076247465058	6.153607170489295e-7	0.0016784635186065655	0.15745908545967524	0.8261180283407414	6.268419028288008e-8	7.07494114779994e-5	0.010149372771471099	0.20361414364431552
ENSG00000100852	ARHGAP5	37.3123912998996	0.0165295647353501	0.0167379678314172	1.2086032920022305e-6	0.003900590051055919	0.2764960445927631	0.9323467281283897	1.2874477729463152e-6	0.004210995186222366	0.2897404769846621	0.9389797837401799
ENSG00000100865	CINP	132.639392437877	0.0563789728524575	0.00969884462274098	0.0014606747110565976	0.8028283206428999	0.9999990445603625	1	1.0259537663870333e-7	1.4547426402489183e-4	0.02037117696307167	0.32262264255714557
ENSG00000100883	SRP54	109.391251851498	0.0469613044886938	0.0255371060805447	4.70383962379084e-4	0.5708130279988712	0.9999032587073069	0.9999999999999173	1.2395854955271624e-5	0.04865263776234907	0.8226148792634362	0.9998050201390981
ENSG00000100889	PCK2	440.304340911785	0.165509011183614	0.089814821495645	0.400556108285815	0.9999999999504592	1	1	0.023963175092416078	0.9980682510729546	0.9999999999999989	1
ENSG00000100902	PSMA6	29.1720491864272	0.0129701279175061	1.48089944000328e-4	3.7286595533370104e-7	8.721409006406944e-4	0.09623398367692826	0.7045380762198674	2.7015945036623634e-11	9.159029090710646e-11	3.1703573100116955e-10	1.0623186774694204e-9
ENSG00000100906	NFKBIA	116.909494942052	0.0500273952393482	0.00165060740731112	6.95996323347936e-4	0.6569841907118964	0.999976896235242	0.999999999999998	4.793355712351399e-10	2.2620176065579756e-8	7.121476791605019e-7	1.4999295754547504e-5
ENSG00000100908	EMC9	53.5605140363071	0.0235579892004809	0.00920125755853976	7.890316689240784e-6	0.03136592042361741	0.7314738202030184	0.9991235440863949	8.233151360670377e-8	1.0568613372308189e-4	0.015026937766772774	0.26574820297409885
ENSG00000100918	REC8	53.9280125919376	0.0237157958797771	0.00585296570869967	8.188208570292232e-6	0.032547955223019565	0.7396567279998789	0.9992194136648567	1.4718517071798942e-8	7.622866101564263e-6	9.585653980578313e-4	0.03029992247579749
ENSG00000100949	RABGGTA	65.4155986323505	0.0286230647377644	0.00147199896875095	2.3815267552129704e-5	0.0875008941343065	0.9167980501413284	0.9999847219529162	3.822346883453065e-10	1.5027952104951225e-8	4.117483459742388e-7	7.87916710887071e-6
ENSG00000100979	PLTP	3244.70109929889	0.593756372094199	0.407961661310921	0.999999995256884	1	1	1	0.9997988734669916	1	1	1
ENSG00000100983	GSS	34.2952495605061	0.0152132909685154	1.53338149972585e-16	8.00052793903383e-7	0.0023424423615202583	0.19870867304932283	0.8754717423025071	1.3510859098175843e-11	1.3510859098175843e-11	1.3510859098175843e-11	1.3510859098175843e-11
ENSG00000100991	TRPC4AP	280.341236654413	0.112121190717761	0.00957890172532599	0.07883026831643891	0.9999746296740398	1	1	9.736089845446827e-8	1.3487011192458986e-4	0.018967396668592706	0.3085904343273158
ENSG00000100994	PYGB	3406.84917958011	0.605463034613332	0.318430820019133	0.9999999977828449	1	1	1	0.9896182528676182	1	1	1
ENSG00000100997	ABHD12	230.983873764653	0.0942412866266097	0.023481754625422	0.031383157290158836	0.9991250389077215	1	1	7.749793467182187e-6	0.030806386088272242	0.7274653828886646	0.9990733353331829
ENSG00000101000	PROCR	45.58518235378	0.0201207099643988	8.48103989098158e-4	3.3471063275447577e-6	0.012716766970190752	0.5203227953937899	0.9909367216622073	1.496749391094454e-10	2.679704680375039e-9	3.8998440810011914e-8	4.6105358098014193e-7
ENSG00000101004	NINL	510.607361721981	0.186994061789968	0.0521838362039833	0.5645493208142074	0.9999999999998936	1	1	9.042606392786201e-4	0.7119497216137989	0.9999919123079561	0.9999999999999999
ENSG00000101017	CD40	572.16275851375	0.204917409190827	0.196942793173459	0.6882654722323986	0.9999999999999996	1	1	0.6355523491636685	0.9999999999999946	1	1
ENSG00000101019	UQCC1	370.113841396922	0.142894816236073	0.0667743218887662	0.23657070395517654	0.9999999804794004	1	1	0.0041432533481564615	0.937614628066628	0.9999999970279209	1
ENSG00000101052	IFT52	472.664374566092	0.175537797814947	0.146911850617425	0.4779029367611328	0.9999999999970319	1	1	0.26362419461085207	0.9999999929725315	1	1
ENSG00000101057	MYBL2	1307.94699568425	0.370738845363682	0.343612015464625	0.9988392816300554	1	1	1	0.9962281992056101	1	1	1
ENSG00000101079	NDRG3	176.174754895466	0.0735233331940982	0.0425738031679785	0.007427170742495215	0.9745186812103755	0.9999999999493326	1	2.5686703691241153e-4	0.4374508010082204	0.9993424796473468	0.9999999999869172
ENSG00000101104	PABPC1L	397.82488044385	0.15196772076534	0.0134784246627794	0.29923037698173927	0.9999999981060479	1	1	4.465803088438136e-7	0.0011070284700360755	0.11573980472940426	0.75209389508328
ENSG00000101109	STK4	59.256073700644	0.0259979887228883	0.0353194472331259	1.3717485341624425e-5	0.05349170759980659	0.84024496191847	0.9998646653424283	8.244069614860017e-5	0.22602912003109155	0.9893935414128388	0.9999999707006426
ENSG00000101138	CSTF1	154.228322152554	0.064959347301832	0.0400398247738434	0.0035002901001366382	0.9221399971626558	0.9999999914767959	1	1.7636084824590448e-4	0.3597664004531973	0.9981589805883874	0.9999999997863046
ENSG00000101150	TPD52L2	71.5357904797988	0.0312174004774417	0.0223447366034443	3.953589317606809e-5	0.13247954281720054	0.9600589575921887	0.9999984885395542	5.896042542197222e-6	0.023311368687227607	0.6635729031449799	0.9979156833025314
ENSG00000101152	DNAJC5	28.9105553871599	0.0128553602622861	0.00408807998139157	3.577494293027783e-7	8.253539191298565e-4	0.0921388033793088	0.6931164644714041	4.598052827375909e-9	1.144854153811714e-6	1.0547258824711303e-4	0.0036515102843684977
ENSG00000101158	NELFCD	1328.75122237773	0.374427830837757	0.223533750016282	0.9990177171260637	1	1	1	0.7932506668865499	1	1	1
ENSG00000101160	CTSZ	350.858194407902	0.136475125376843	0.116936196538131	0.19601619658051772	0.9999999038640226	1	1	0.09706044606290554	0.999991018846707	1	1
ENSG00000101161	PRPF6	417.041054455848	0.158147349944047	0.0115026357939877	0.34463776233571275	0.999999999632447	1	1	2.1537762417978001e-7	4.145007641426224e-4	0.05223200579530818	0.5426021259334677
ENSG00000101166	SLMO2	14.2816899563351	0.00639207223535642	0.00620331612412855	2.0112772447511418e-8	1.2481668790087497e-5	0.0016552152627493655	0.048969906231492444	1.8063833540082896e-8	1.0541950071996098e-5	0.0013747081502519798	0.04169125076463254
ENSG00000101181	MTG2	236.686787480569	0.0963439005276293	0.0868757889968003	0.03544896220537552	0.9994068020964163	1	1	0.01982399483981845	0.9967974944386393	0.9999999999999916	1
ENSG00000101188	NTSR1	2414.7559184061	0.521010374854117	0.509883516102507	0.9999995699061117	1	1	1	0.999999172717477	1	1	1
ENSG00000101189	MRGBP	109.685786374879	0.0470817940412281	0.0329467715591572	4.7790101360323245e-4	0.5743459505862569	0.9999084253145908	0.9999999999999283	5.4396557407798696e-5	0.16874438543778192	0.9766143499670673	0.9999997014405936
ENSG00000101190	TCFL5	480.047190504467	0.177792148297518	0.0456981559270726	0.49521183951184156	0.9999999999984438	1	1	3.9741477036792094e-4	0.5332170741003777	0.9998292241533544	0.9999999999996345
ENSG00000101191	DIDO1	333.363577964634	0.13055860154094	0.0632921928160117	0.16194950951832487	0.9999996000082002	1	1	0.0029839037624298514	0.9052768572998575	0.9999999779307475	1
ENSG00000101193	GID8	32.2619416382127	0.0143242404632325	0.00968613022570916	5.969853228426913e-7	0.001614369896033363	0.15311155983728242	0.8197478348220313	1.0202943601100856e-7	1.4431742647524892e-4	0.020218730251089334	0.3211267171456422
ENSG00000101194	SLC17A9	361.756593153988	0.140120332843636	0.0753347008505505	0.2186145500039145	0.9999999608893173	1	1	0.008593494311148864	0.9803259965357113	0.9999999999836671	1
ENSG00000101199	ARFGAP1	30.7245699073513	0.0136509683673183	0.010929759492974	4.742879752273055e-7	0.0011979064245563054	0.12286858511325183	0.7670742368240997	1.716761420800239e-7	3.024356992054056e-4	0.03971384031398517	0.47280893091658915
ENSG00000101213	PTK6	104.819298478938	0.045087073454491	0.0147200512668552	3.6571329674284225e-4	0.5147192974424786	0.9997762396758375	0.9999999999992558	6.811181924026855e-7	0.0019109770557205197	0.17264522373213043	0.8464479962819751
ENSG00000101216	GMEB2	169.383192018831	0.07088992363578	0.0629666872439092	0.005960703690771174	0.963387966217635	0.9999999997447895	1	0.002890778530580951	0.9016644549734355	0.9999999734752669	1
ENSG00000101220	C20orf27	1487.10835161251	0.401150495362687	0.381929567779813	0.9997197197444144	1	1	1	0.9993037426843149	1	1	1
ENSG00000101224	CDC25B	299.203791657912	0.11876918915758	0.0383937714641749	0.10464788638854927	0.9999940040532713	1	1	1.365512116001666e-4	0.3108640609060288	0.9965216788582981	0.9999999987588244
ENSG00000101230	ISM1	577.677429885278	0.206484644625012	0.206134196210711	0.6981154356635956	0.9999999999999997	1	1	0.6959281622618867	0.9999999999999997	1	1
ENSG00000101236	RNF24	148.556265372274	0.0627201758067272	0.00812828683865898	0.002821852974429273	0.8988561875833272	0.9999999695242161	1	4.985752277697486e-8	5.0280483146480925e-5	0.007206023616746937	0.15919442581520982
ENSG00000101247	NDUFAF5	457.985747798817	0.171018739802951	9.87844342162555e-5	0.44303981847015694	0.9999999999893229	1	1	2.213862426714286e-11	5.7930882313428356e-11	1.6070156316772e-10	4.393480024234009e-10
ENSG00000101255	TRIB3	1253.58603049612	0.360891027166261	0.360257251057144	0.9982014918072868	1	1	1	0.9981507994164094	1	1	1
ENSG00000101265	RASSF2	40.8824853512586	0.0180825344157182	0.0183803379492114	1.9109655492455246e-6	0.006730623260939206	0.3793788712129693	0.969910244069827	2.079745359706564e-6	0.007425968140347128	0.399895782191681	0.9745115760424785
ENSG00000101290	CDS2	2241.58362439586	0.502418829973044	0.483607088645403	0.9999987240931723	1	1	1	0.9999962748334015	1	1	1
ENSG00000101294	HM13	392.451103709361	0.150223329788691	0.106453490161506	0.28676750880156066	0.9999999970132731	1	1	0.06046411631646709	0.9999175934217966	1	1
ENSG00000101298	SNPH	1145.51948669803	0.340369292534366	0.334000841802425	0.9956833730646031	1	1	1	0.994395281612578	1	1	1
ENSG00000101307	SIRPB1	7046.06823511914	0.760416182606338	0.754297425334493	0.9999999999999577	1	1	1	0.9999999999999334	1	1	1
ENSG00000101310	SEC23B	306.999101175237	0.121487617875472	0.0284181204080131	0.11656110556819699	0.9999967349900468	1	1	2.2844968782909092e-5	0.08443614874669003	0.9121568986356573	0.999981776773013
ENSG00000101336	HCK	35.6181322258608	0.0157908520582394	9.85375577126483e-5	9.61628131235237e-7	0.0029467692258922096	0.2314782286784135	0.9038605562968168	2.2115198561323268e-11	5.7783888784967985e-11	1.6009016334805892e-10	4.371680795145494e-10
ENSG00000101337	TM9SF4	13.7536282289073	0.00615718226714746	0.00188295096848991	1.7590352174856605e-8	1.0109569506311367e-5	0.0013125447335002871	0.040037599140963165	6.311743350195798e-10	3.704594975229014e-8	1.3707594003209422e-6	3.2089276382429865e-5
ENSG00000101342	TLDC2	27.844091959192	0.0123870209943802	3.502967190839e-4	3.013706597609911e-7	6.556681685661037e-4	0.07659784559915028	0.6440837223404605	5.145495141078982e-11	3.4798208758957117e-10	2.1923053372674417e-9	1.2673149196729128e-8
ENSG00000101347	SAMHD1	198.049164490807	0.0819045234477326	0.00691405760814954	0.01409149805307508	0.9927562589573228	0.9999999999997639	1	2.6809551800788256e-8	1.9530447175619692e-5	0.0026878818348938793	0.07366147330828066
ENSG00000101353	MROH8	113.078475679712	0.0484674977110523	0.013738412039315	5.719216289227225e-4	0.6141788698288361	0.9999516886839853	0.9999999999999863	4.888839850725191e-7	0.0012462914604013386	0.12657911895822005	0.7744363525314457
ENSG00000101361	NOP56	280.720390057764	0.112255808835661	0.0998815255680453	0.07930673726675386	0.9999753443112418	1	1	0.04313745483161269	0.99969685278001	1	1
ENSG00000101365	IDH3B	50.0719317949062	0.0220574207775501	0.0221088794439316	5.493435654257972e-6	0.021656939056066693	0.6462831861755778	0.9974575387061586	5.563745647307883e-6	0.021946497997970882	0.6494113062416131	0.9975459669545323
ENSG00000101367	MAPRE1	332.138918917401	0.130141394912112	0.0174281320347992	0.15967608721329418	0.9999995584278667	1	1	1.5810355502576812e-6	0.005385409679706021	0.3349859032987511	0.9571767452060168
ENSG00000101384	JAG1	47.5913761929955	0.0209876332626099	0.0197646349969528	4.1955862750686634e-6	0.01626953635242756	0.5784491002140941	0.9947916226029978	3.044185542866451e-6	0.011446915947429304	0.4958977361980256	0.988704085315656
ENSG00000101400	SNTA1	269.637701876584	0.108303992052073	0.0899522562637077	0.06610083982620252	0.9999436018744553	1	1	0.02417151537813289	0.9981141418585667	0.999999999999999	1
ENSG00000101407	TTI1	66.3380589886414	0.0290149825953498	0.0223770916345504	2.577007027182443e-5	0.09355987056138548	0.9251166964989794	0.9999891235003561	5.9429371734864844e-6	0.023503489168111513	0.6654926105812292	0.9979621237487338
ENSG00000101413	RPRD1B	87.8764431773226	0.038076753821509	0.00494327565055244	1.2984233452562055e-4	0.30167454952971773	0.9960802975678299	0.9999999982672889	8.333459811105115e-9	3.0511044353254135e-6	3.3681344437064276e-4	0.011475909509854332
ENSG00000101421	CHMP4B	290.073805752022	0.115563855169237	0.0846008794973947	0.0916143418841231	0.9999878841130287	1	1	0.017013612116193788	0.9953184665819572	0.9999999999999608	1
ENSG00000101425	BPI	537.84719887927	0.195024292534351	0.195218872253622	0.6222715666049998	0.9999999999999903	1	1	0.6236283200290738	0.9999999999999909	1	1
ENSG00000101439	CST3	532.340881327199	0.193413862700938	0.186831219881388	0.6109606001680495	0.9999999999999843	1	1	0.563347491215085	0.9999999999998884	1	1
ENSG00000101442	ACTR5	557.945336280467	0.200848205684108	0.176042229973581	0.6618910148152125	0.9999999999999983	1	1	0.4817827890174714	0.9999999999974302	1	1
ENSG00000101444	AHCY	23.4020766994942	0.0104315124526957	0.0103146674613135	1.4004749460116983e-7	2.2702557042286742e-4	0.03072734333936944	0.41128761285529636	1.3339564619574418e-7	2.1187593367988367e-4	0.028857883250284377	0.39691432600099896
ENSG00000101445	PPP1R16B	20.2688666324694	0.0090475152042519	0.00430305379473141	7.680262126275039e-8	9.546049108133392e-5	0.013618066806862505	0.24898560854194351	5.373655631579766e-9	1.483554828318745e-6	1.4393166175397099e-4	0.004992621050771584
ENSG00000101452	DHX35	255.960958389606	0.103378430714871	0.104379751394988	0.051845390398986835	0.9998470846098715	1	1	0.0545509742394088	0.9998747591676758	1	1
ENSG00000101457	DNTTIP1	363.992105910736	0.140864248415514	0.00293670766005704	0.22336723998543817	0.9999999675098142	1	1	1.815746331068624e-9	2.3670407423015405e-7	1.506621880609238e-5	4.719986382319963e-4
ENSG00000101460	MAP1LC3A	531.135352848953	0.193060422235835	8.18336019322679e-4	0.6084590759571026	0.9999999999999826	1	1	1.419768747012995e-10	2.42796904803555e-9	3.4005188997987545e-8	3.8970545057637196e-7
ENSG00000101473	ACOT8	25.8107677169481	0.0114928506390531	0.0141576154840618	2.145584306889603e-7	0.00041232644391153705	0.05199742361932935	0.5414291035494736	5.64334388442056e-7	0.0015015144901218136	0.14527161667873423	0.807569669748607
ENSG00000101474	APMAP	252.891274223036	0.102265423821552	0.0634466747647456	0.048950196754010245	0.9998094551874307	1	1	0.0030289538230285906	0.9069536307564429	0.9999999797795005	1
ENSG00000101493	ZNF516	432.61953257246	0.163091437448971	0.163404209453609	0.382038959938225	0.9999999999037554	1	1	0.38442786530614326	0.9999999999116505	1	1
ENSG00000101546	RBFA	81.894492837815	0.0355769967270976	0.0160277040336707	8.612296916876705e-5	0.23272090815187307	0.9903023551841066	0.9999999773719305	1.0355802614325782e-6	0.0032290348265144875	0.24555911355937743	0.9138922108960097
ENSG00000101558	VAPA	542.081894397028	0.19625844385594	0.125355274685459	0.6308398171980916	0.9999999999999933	1	1	0.1348646494871626	0.9999986484888084	1	1
ENSG00000101574	METTL4	323.493567771541	0.127184739867444	0.0991207421496711	0.14407015302161197	0.9999991156330204	1	1	0.04139127119449859	0.999649136659307	1	1
ENSG00000101577	LPIN2	1734.7525192637	0.438650082606605	0.428222336603234	0.9999574509007408	1	1	1	0.9999271164958021	1	1	1
ENSG00000101605	MYOM1	1349.62038867886	0.378085129992874	0.250126669309684	0.9991687931622507	1	1	1	0.896665941737406	1	1	1
ENSG00000101608	MYL12A	73.9329559741657	0.0322297806401097	0.0221447475123487	4.77379440884107e-5	0.15311664375526124	0.9706770807842566	0.9999994107735617	5.613211939925478e-6	0.022150057418221403	0.6515836650566185	0.9976058937008305
ENSG00000101639	CEP192	1891.35608140347	0.460032175261703	0.444836500560171	0.9999863327119696	1	1	1	0.9999692326380514	1	1	1
ENSG00000101654	RNMT	548.612506438952	0.198154312011177	0.163332899634525	0.6438255277204595	0.9999999999999962	1	1	0.3838830168085158	0.9999999999099087	1	1
ENSG00000101695	RNF125	91.0574863774687	0.0394007881301989	0.040935874161522	1.5986625702091306e-4	0.34057104821314266	0.9976357684021612	0.9999999995746787	2.0192373636263028e-4	0.38702174823634083	0.9987120702504099	0.9999999999194932
ENSG00000101751	POLI	1480.94171384816	0.400152671496225	0.377166972363607	0.9997058765476298	1	1	1	0.9991330813078947	1	1	1
ENSG00000101773	RBBP8	200.66120579707	0.0828952045484599	0.0822463749681559	0.01511584765408347	0.9938189432801997	0.9999999999998774	1	0.014438674995437384	0.993140579208618	0.9999999999998116	1
ENSG00000102445	KIAA0226L	196.289260029648	0.0812358285395184	0.0826420360362795	0.01343118037981772	0.9919467990084507	0.9999999999996332	1	0.014848753291719863	0.9935619554485777	0.999999999999855	1
ENSG00000102524	TNFSF13B	163.451892998888	0.0685778024213574	0.0682816093231276	0.004874245358945761	0.9503539723864194	0.9999999989751394	1	0.0047475033934967215	0.9484275839277324	0.999999998777843	1
ENSG00000102531	FNDC3A	27.1262333930614	0.0120715218352918	0.0120663699480049	2.6783456186230126e-7	5.587891007456935e-4	0.06717308439169345	0.6090536920525951	2.6731459623619003e-7	5.573135362553217e-4	0.06702604114958233	0.6084696849014867
ENSG00000102543	CDADC1	211.037214499056	0.0868095367855331	0.0573203437335665	0.019737441694824942	0.9967614167922308	0.9999999999999912	1	0.0016184535936331068	0.8201648856443708	0.9999994178903767	1
ENSG00000102547	CAB39L	281.118752822318	0.112397203253583	0.033390836184381	0.0798092313093074	0.9999760739486555	1	1	5.890878637615504e-5	0.1788309449217611	0.9797330371614263	0.9999998050453333
ENSG00000102554	KLF5	20.0736820892503	0.00896117045155771	0.0101502036955295	7.383762279378203e-8	9.009883147048647e-5	0.012873239455188812	0.23976565066134004	1.2448914366025576e-7	1.920180337081634e-4	0.02637157177616134	0.37679087143278955
ENSG00000102572	STK24	226.481212536678	0.0925742700888541	0.0923144677536847	0.0284128899757643	0.9988159703027699	0.9999999999999999	1	0.027969519734102	0.998759379194637	0.9999999999999998	1
ENSG00000102575	ACP5	4947.09947322738	0.690251264365343	0.627958820340663	0.999999999993091	1	1	1	0.9999999994987858	1	1	1
ENSG00000102580	DNAJC3	65.1777837655067	0.0285219750640613	0.00182678560553526	2.3332313699553353e-5	0.0859803229847188	0.9145343408517599	0.9999833320079503	5.916175327413953e-10	3.3000047028330926e-8	1.1764030580785345e-6	2.6892487581031688e-5
ENSG00000102595	UGGT2	457.022575827866	0.170720478771656	0.153725248858976	0.44073579704139865	0.9999999999883893	1	1	0.31195781275757384	0.9999999988070388	1	1
ENSG00000102606	ARHGEF7	861.92924789643	0.27967197770187	0.276712570957406	0.9583218822997912	1	1	1	0.9540710298491025	1	1	1
ENSG00000102699	PARP4	552.91864059927	0.199399518075934	0.193849459087844	0.6522337207745864	0.9999999999999974	1	1	0.6140342507253798	0.9999999999999862	1	1
ENSG00000102710	SUPT20H	1112.46447836628	0.333826357516543	0.0897221472002758	0.9943554466331874	1	1	1	0.023823454002268818	0.9980367170809596	0.9999999999999988	1
ENSG00000102743	SLC25A15	15.9566818242291	0.00713640025047833	0.00170606118080756	3.017871863519872e-8	2.3444423137730652e-5	0.0032653124128485533	0.08633415188914018	5.128194535686248e-10	2.5540805137502787e-8	8.372375365217621e-7	1.811738491808157e-5
ENSG00000102753	KPNA3	21.4638684706208	0.00957582621452909	0.00618480200907538	9.722971527903468e-8	1.3460714936930351e-4	0.018932401791151743	0.3082330561674864	1.78725654276235e-8	1.0366550123985796e-5	0.00134947268632013	0.04102182141360844
ENSG00000102755	FLT1	253.968201624489	0.10265621096412	0.10306807695344	0.04995338681869388	0.9998235790114015	1	1	0.05102628898258765	0.9998373770709185	1	1
ENSG00000102760	RGCC	98.2754734967921	0.0423916288725418	0.0416712499887406	2.501874593994202e-4	0.431822850751734	0.9992905743788534	0.9999999999839544	2.2520284850380268e-4	0.4095998443405142	0.9990447487863957	0.9999999999642092
ENSG00000102763	VWA8	51.0704399662044	0.0224873870345318	0.021322238524253	6.10522567578986e-6	0.02416739694264669	0.6719940972691971	0.9981132475545772	4.569502500606504e-6	0.017829090367492473	0.6002003569928205	0.9958218468505254
ENSG00000102781	KATNAL1	10.9552508600632	0.00491056503972448	0.0051953990947094	8.155594088954388e-9	2.9456940373595586e-6	3.2330502894228896e-4	0.011034285833623314	9.813838852679169e-9	3.978739016918809e-6	4.5796299547085084e-4	0.015362982565447103
ENSG00000102796	DHRS12	375.016345798284	0.144514059190992	0.135584270174383	0.2473320946442138	0.999999987040449	1	1	0.1906743504945685	0.9999998805187928	1	1
ENSG00000102805	CLN5	185.93105536196	0.0772802923623213	0.0760236245073219	0.010003708041470216	0.9852207768363266	0.9999999999952432	1	0.009073513394938892	0.9822040938309766	0.9999999999894257	1
ENSG00000102837	OLFM4	796.000259747639	0.263925792836053	0.259852055327463	0.9312028223896713	1	1	1	0.922174179643209	1	1	1
ENSG00000102858	MGRN1	1411.30955542678	0.388650302015057	0.241167132805567	0.9994911797086306	1	1	1	0.8676789417054298	1	1	1
ENSG00000102879	CORO1A	63.2484415583735	0.0277010772928437	0.00776508644452306	1.971334616190923e-5	0.07426889527002223	0.8942505932390022	0.9999664960975974	4.167930500731387e-8	3.837917853199979e-5	0.005467128735871407	0.1294311632113826
ENSG00000102882	MAPK3	542.165319328972	0.196282719044739	0.0017114930721129	0.6310074569280872	0.9999999999999934	1	1	5.161888694260597e-10	2.584304736874543e-8	8.504478474780086e-7	1.8450878050968456e-5
ENSG00000102886	GDPD3	306.589295458359	0.121345125624281	5.4478957258586e-4	0.11591706886283892	0.9999966284426732	1	1	8.265654827255275e-11	8.734065692905801e-10	8.115473626446601e-9	6.595989909818911e-8
ENSG00000102890	ELMO3	191.500038577259	0.0794111696097008	7.24971743651819e-7	0.011751605886879957	0.9892991210602229	0.9999999999987931	1	1.3568923762363738e-11	1.374333979953235e-11	1.4035772544218617e-11	1.4448220397866862e-11
ENSG00000102900	NUP93	38.6518053291722	0.0171127772939482	0.00969567866982446	1.440432508936773e-6	0.004819701579553359	0.3140714760494604	0.9495376097716114	1.0245420611898481e-7	1.451854663521157e-4	0.02033313532230363	0.3222499684305886
ENSG00000102910	LONP2	90.3835525480261	0.0391205834409381	0.0315755675194365	1.5306075148402432e-4	0.3322326445111702	0.9973649942514287	0.9999999994260527	4.228664615035793e-5	0.13958625513924328	0.9641449240520712	0.9999989142886179
ENSG00000102931	ARL2BP	18.1349955478475	0.00810272641459165	4.57459852388919e-4	4.924097807279537e-8	4.934999829020459e-5	0.00707075198836471	0.15698652319701523	6.762790327741186e-11	5.937198510608255e-10	4.697257027785895e-9	3.321007124856834e-8
ENSG00000102934	PLLP	137.886527420903	0.0584788647873252	0.0371663780426672	0.0018318275157881425	0.8399730745208599	0.999999686119278	1	1.1212160848217412e-4	0.275792097103292	0.994507231950126	0.9999999955264013
ENSG00000102967	DHODH	90.5720068068792	0.0391989544320872	0.00965554164872142	1.5493876251648775e-4	0.3345596006627436	0.9974435109986166	0.9999999994721319	1.0067871969443587e-7	1.415664679418338e-4	0.01985553270952589	0.3175358078471888
ENSG00000102977	ACD	56.9373122438838	0.0250060956609179	1.04206348567163e-5	1.10107364655887e-5	0.04347114469798441	0.8006285100613874	0.9997050928236053	1.4352075083934324e-11	1.6971535288234918e-11	2.166600232555993e-11	2.896416440023586e-11
ENSG00000102978	POLR2C	147.337488709451	0.0622376359146714	0.0600098586058052	0.0026908402504363105	0.89317474640103	0.9999999600468564	1	0.002149110957328171	0.8636275777368734	0.9999998630201826	1
ENSG00000102981	PARD6A	25.8033044521217	0.0114895656271272	1.38088534868902e-4	2.142840128671608e-7	4.115986653014936e-4	0.051918837189657174	0.5410351142098451	2.5994428831666028e-11	8.404099638426032e-11	2.793234532560973e-10	9.015904689491094e-10
ENSG00000103005	USB1	97.4445326324693	0.0420482696609694	0.00270972221140366	2.3799943252733602e-4	0.42122208070331535	0.9991820097573089	0.9999999999764573	1.4765568767671766e-9	1.654929534522509e-7	9.56750087166558e-6	2.872825413161584e-4
ENSG00000103018	CYB5B	79.2870785602246	0.0344833315072047	0.0224586400281829	7.140204760680557e-5	0.20491571936750386	0.9858843669954999	0.9999999327866957	6.0625630207145065e-6	0.02399301376452112	0.6703059640038577	0.9980749058057483
ENSG00000103037	SETD6	60.3342886564992	0.0264585280134722	0.0226751217289478	1.5157890778549898e-5	0.05865375842646292	0.8565419933137789	0.9999065526206199	6.390266519051835e-6	0.025329786522442888	0.6829060167594152	0.9983465508078821
ENSG00000103042	SLC38A7	197.757585022947	0.0817938019295141	0.0810377685186346	0.013980454745533777	0.9926276069799653	0.9999999999997459	1	0.013240306697079873	0.9916916116335975	0.9999999999995822	1
ENSG00000103047	TANGO6	26.3749782973041	0.0117411289531437	0.0109504031209965	2.3618631828092873e-7	4.705830031974667e-4	0.058180891432842885	0.570907320141754	1.731079125599777e-7	0.00030597125427656024	0.04012312872736945	0.475352551324991
ENSG00000103051	COG4	177.809765592639	0.0741550760798955	0.0261695901453905	0.00781861657277505	0.9766967729723226	0.9999999999657986	1	1.4239732070708833e-5	0.0553765353896396	0.8464698056249375	0.9998820349630371
ENSG00000103056	SMPD3	66.2400108338893	0.0289733407341291	0.00330770742956004	2.5556009964122772e-5	0.09290370112528445	0.9242666376384306	0.9999887217304276	2.4986082092226525e-9	4.0925022870563765e-7	2.9924707764861225e-5	9.86750057177077e-4
ENSG00000103064	SLC7A6	340.994132620975	0.13314912684786	0.0131590876651051	0.1764514362573163	0.999999784598483	1	1	3.989468809750818e-7	9.540201323706698e-4	0.10322431943685428	0.7228033586565753
ENSG00000103091	WDR59	87.8678878637239	0.0380731879523047	0.00863502580000203	1.2976850686075014e-4	0.30157167264154516	0.9960750493420866	0.9999999982607912	6.349438086417081e-8	7.2109100542117055e-05	0.010342639773244011	0.20631875106525077
ENSG00000103111	MON1B	1244.25513826683	0.359169601719731	0.358255886714577	0.9980606657949485	1	1	1	0.997981777372431	1	1	1
ENSG00000103121	CMC2	66.9467524090796	0.0292734198286679	0.00301451614205668	2.713345734661754e-5	0.09769824500898039	0.9302182279088291	0.9999913236540314	1.9450322463754333e-9	2.6647817386038497e-7	1.7493606547125395e-5	5.549417019528047e-4
ENSG00000103126	AXIN1	61.1116075051598	0.0267902751027589	0.0178613719624183	1.6274685591399773e-5	0.06257899797817967	0.86748472196661075	0.9999286724381652	1.7933913183387773e-6	0.0062488235993324315	0.3642514943693047	0.9660367515995637
ENSG00000103148	NPRL3	363.118909175737	0.140573826425825	0.103170441727628	0.22150630622135348	0.9999999650675414	1	1	0.051295442410934644	0.9998406424347105	1	1
ENSG00000103150	MLYCD	59.5037250654753	0.0261038068993575	0.02572445044909	1.4037536458233468e-5	0.054648602668494695	0.844105070606247	0.9998756456020447	1.2919177623804678e-5	0.050580778347787736	0.829942751164028	0.999831802889664
ENSG00000103152	MPG	47.9346297142885	0.0211358074815089	0.00510314520602142	4.3577732328214935e-6	0.0169466149246309	0.5881355070814631	0.9952738378525288	9.249055965554476e-9	3.6144717114883207e-6	4.0994360154922305e-4	0.013837573040411
ENSG00000103154	NECAB2	1695.37814102766	0.43300495634444103	0.268003429621626	0.9999429846567875	1	1	1	0.9393519932962814	1	1	1
ENSG00000103160	HSDL1	362.111427447505	0.14023849768771	0.0138166072997342	0.21936637889981636	0.9999999620230208	1	1	5.022608904337034e-7	0.0012909309551294434	0.12995266611768608	0.780888271960188
ENSG00000103168	TAF1C	611.472121519004	0.215955550779348	0.185406125253669	0.7537549622025543	1	1	1	0.5527843199394595	0.99999999999983	1	1
ENSG00000103174	NAGPA	657.026717749315	0.228370043870605	0.21879645125501	0.8160718119665009	1	1	1	0.7690942137764153	1	1	1
ENSG00000103184	SEC14L5	571.232047396727	0.204652296081758	0.188808478876178	0.6865819799044678	0.9999999999999994	1	1	0.5778637853746005	0.9999999999999378	1	1
ENSG00000103187	COTL1	53.5435689009876	0.023550711599897	0.023457903966292	7.876807573414801e-6	0.03131218383809298	0.7310927132153828	0.9991188644783716	7.706275778174287e-6	0.03063285624946921	0.7262039447311733	0.99905707639107455
ENSG00000103194	USP10	232.441696986702	0.0947797035388453	0.100334528057271	0.03238977770572582	0.9992073305781487	1	1	0.04420194755239859	0.9997222521515053	1	1
ENSG00000103196	CRISPLD2	1467.03128881292	0.397889568570829	0.39471564730176	0.999672020203803	1	1	1	0.9996182219020294	1	1	1
ENSG00000103199	ZNF500	809.782587671114	0.26727415721719	0.145507245303551	0.9379569789131966	1	1	1	0.25403023743063824	0.9999999899345039	1	1
ENSG00000103202	NME4	3157.25527098287	0.587149969989388	0.493168827361823	0.9999999927447545	1	1	1	0.9999978311321868	1	1	1
ENSG00000103222	ABCC1	339.837547651107	0.132757466567728	0.133580447500785	0.17421674358174966	0.9999997633422524	1	1	0.17892954768081049	0.9999998058473961	1	1
ENSG00000103226	NOMO3	1254.07970469947	0.360981845926865	0.301123374679701	0.9982086481195238	1	1	1	0.9801719742059304	1	1	1
ENSG00000103227	LMF1	550.725419557379	0.198765787353031	0.109518948989612	0.6479666966561544	0.9999999999999969	1	1	0.06998986309374278	0.9999561589399713	1	1
ENSG00000103245	NARFL	924.976926040113	0.294112468165153	0.00633855851154604	0.9745358285813888	1	1	1	1.951322159410296e-8	1.190277782392446e-5	0.0015712507245675411	0.04682124512689734
ENSG00000103248	MTHFSD	1110.18463104533	0.333370294456271	0.333583869916279	0.9942500901761478	1	1	1	0.9942996526239167	1	1	1
ENSG00000103249	CLCN7	616.793074006977	0.217426177347421	0.0805581101531173	0.7617749351717816	1	1	1	0.012786815446790833	0.9910426616287166	0.9999999999994281	1
ENSG00000103253	HAGHL	263.435237289517	0.106076950722918	8.23683919655253e-4	0.05935902085741729	0.999911041087889	1	1	1.4334056164244657e-10	2.471754356747624e-9	3.486041577627219e-8	4.0177589788470414e-7
ENSG00000103257	SLC7A5	181.32798549115	0.0755115446897447	0.0641532195206382	0.00871474195141042	0.980824259492671	0.9999999999853886	1	0.0032421683325516426	0.9143205784148551	0.9999999864714084	1
ENSG00000103260	METRN	200.207120288414	0.0827231349788588	0.00218868439415011	0.014933911595825355	0.9936453288716064	0.9999999999998626	1	8.822065300506665e-10	6.713849598494193e-8	2.9903371191464245e-6	7.831592831919476e-5
ENSG00000103264	FBXO31	171.915472666474	0.0718735568338563	0.0316935635285919	0.006478372839868518	0.9679622681921568	0.9999999998599116	1	4.322821268387678e-5	0.14197439642738585	0.9654090826496976	0.9999990269748951
ENSG00000103269	RHBDL1	36.08113851833	0.0159928372709264	4.75668136174517e-4	1.0243960694156229e-6	0.0031861450470007657	0.24346427008084293	0.9124710200977628	7.061951023956681e-11	6.455187495646442e-10	5.289584881218445e-9	3.8561716375618005e-8
ENSG00000103275	UBE2I	61.3108976083365	0.026875292478817	6.07568814498255e-4	1.6572060755892792e-5	0.06361319255156384	0.8701839284598	0.9999334724766183	9.456246896633047e-11	1.1288350254545776e-9	1.165138274750177e-8	1.035924594994242e-7
ENSG00000103313	MEFV	968.460505239436	0.303739219491041	0.250157730311462	0.9819713272668394	1	1	1	0.8967569018791443	1	1	1
ENSG00000103326	CAPN15	293.931091962833	0.116920902447384	0.0741416151500276	0.09699864649483148	0.9999909886973978	1	1	0.007810107672307609	0.9766521396470206	0.9999999999655103	1
ENSG00000103335	PIEZO1	148.396491580617	0.0626569462115613	0.0357616627242992	0.0028043931113498344	0.8981256861452074	0.9999999684210384	1	8.884926873342636e-5	0.2375712042744662	0.9909096596012599	0.9999999812126188
ENSG00000103342	GSPT1	88.5327350564774	0.0383502186094457	0.0368781395907499	1.3561231454750633e-4	0.30959658821103153	0.996463908747408	0.9999999987004803	1.0696199377036031e-4	0.26776910005749577	0.9938987648388456	0.9999999939774983
ENSG00000103343	ZNF174	76.6848264319571	0.0333893556266019	0.00588182553220254	5.8893223672362716e-5	0.17879680795405217	0.9797232866189718	0.9999998047668449	1.4973060236123104e-8	7.833488873343342e-6	9.882676117380917e-4	0.03113979325429228
ENSG00000103351	CLUAP1	2286.87495241746	0.507419215434587	0.294610533800143	0.9999990450302215	1	1	1	0.9749785788253549	1	1	1
ENSG00000103353	UBFD1	38.0913251691356	0.0168688151557743	0.00998247930948311	1.3391815234520266e-6	0.004415948210615861	0.29816346358729284	0.9428590460048546	1.1593156112876812e-7	1.734246952155294e-4	0.02400474257021512	0.3564487845845301
ENSG00000103355	PRSS33	22.349110582404	0.00996682919574432	0.00853571994113372	1.1515920528282209e-7	1.7177107971733108e-4	0.02379235296693538	0.3545620104756564	6.059948520764635e-8	6.728558920354732e-5	0.009655744966489466	0.19659856661227337
ENSG00000103356	EARS2	149.289186946851	0.0630101161856187	0.00760021112017685	0.002903063488804092	0.9021526897545696	0.9999999741172091	1	3.835741935187542e-8	3.383417243307818e-5	0.004798649995071402	0.1170859100853534
ENSG00000103365	GGA2	70.7034094019725	0.030865370484794	0.0122577863960181	3.698381721828348e-5	0.12570464631911615	0.9556573617823546	0.9999979132453735	2.872236870565814e-7	6.143999212732121e-4	0.0726368727679364	0.62991476987606
ENSG00000103381	CPPED1	144.437166385782	0.0610873354721305	0.0619545386996134	0.002398601592846883	0.8786158861959659	0.9999999242351013	1	0.0026163356625520384	0.8897260211574383	0.99999995319791	1
ENSG00000103404	USP31	38.64303371127	0.017108960174098	0.0174004706198216	1.4387989307751425e-6	0.004813161751768491	0.31382064802626153	0.9494384588035585	1.568246926875183e-6	0.00533373826482586	0.3331370142015434	0.9565489444781252
ENSG00000103415	HMOX2	28.7602137737149	0.0127893643784508	6.9936237175686e-5	3.4929686210105615e-7	7.994180461325939e-4	0.08983529072820984	0.686439090889968	1.9465207223845482e-11	4.207234560738016e-11	9.893441621500187e-11	2.327101844556978e-10
ENSG00000103423	DNAJA3	316.633280426118	0.124824223851911	0.0852502660804818	0.13225795873222101	0.9999984726849921	1	1	0.017782457541239194	0.9957949314316029	0.9999999999999747	1
ENSG00000103429	BFAR	16.9421749537145	0.00757380997301152	0.00610198801898392	3.784673119344717e-8	3.3151301050193815e-5	0.004698046748584206	0.11517775274893094	1.703745045045224e-8	9.612464008768029e-6	0.0012412715717714518	0.03812206029344334
ENSG00000103479	RBL2	685.706124184847	0.235986054638341	0.00489687699188057	0.8482876877306517	1	1	1	8.082091440542172e-9	2.9025258733161863e-6	3.177905057958341e-4	0.010853500994773113
ENSG00000103485	QPRT	85.3362815423973	0.0370168474879954	0.0293065094090652	1.0941894551386167e-4	0.27161904882827914	0.9941989347198191	0.9999999947794039	2.7312431241655055e-5	0.09823633668180554	0.9308501209760472	0.9999915720466005
ENSG00000103489	XYLT1	485.376114922862	0.179411695196659	0.179940934974625	0.5075887771133443	0.9999999999990242	1	1	0.5116206368587439	0.9999999999991627	1	1
ENSG00000103496	STX4	702.523660125045	0.240382539826893	7.89231446042897e-7	0.864870062264266	1	1	1	1.3574030788277014e-11	1.376410097009284e-11	1.4082512933555336e-11	1.4532264280830987e-11
ENSG00000103502	CDIPT	61.828265883694	0.0270959330323439	0.0161577546906159	1.7365793891555015e-5	0.06635148037727823	0.8769924879220147	0.9999445226377913	1.0782287293009674e-6	0.0033932038131575526	0.2534375480014558	0.9190287871760155
ENSG00000103507	BCKDK	95.6121389835294	0.0412902218700148	0.00971766540032641	2.1287077992793169e-4	0.39788294624051357	0.9988840884291688	0.9999999999454685	1.0343800960210814e-7	1.472012541153811e-4	0.020598444858752618	0.32484054250024197
ENSG00000103510	KAT8	100.753506833794	0.0434141353388505	2.68411988134035e-5	2.8968008008600776e-4	0.4634069929484118	0.9995386400851717	0.9999999999949309	1.570987784305089e-11	2.295907908234085e-11	3.738864773339401e-11	6.316858147670246e-11
ENSG00000103512	NOMO1	71.2100764990751	0.0310796802220261	0.00914872647836855	3.8519985578688853e-5	0.12980419588163894	0.9583840123424574	0.9999982847300996	8.04057268544156e-8	1.0209152196283267e-4	0.01453340137597725	0.25997254277816406
ENSG00000103540	CCP110	33.1964823317515	0.0147330614937751	0.00576822993333236	6.840480468728316e-7	0.001921444635256675	0.17330860545829385	0.8472731774720674	1.3991731107054761e-8	7.0324566161517055e-6	8.756465821394555e-4	0.027930876479381528
ENSG00000103544	C16orf62	74.0461211939008	0.0322775207132125	0.0234486964224166	4.815837998628503e-5	0.15413148178463487	0.9711100643073293	0.9999994366692952	7.689532326438098e-6	0.030566058922066652	0.725716030359844	0.999050727748885
ENSG00000103549	RNF40	341.895956324457	0.133454270646874	0.0513007332266856	0.1782027592200235	0.9999997998532796	1	1	8.134082168467227e-4	0.6900730169223048	0.999987517819997	0.9999999999999996
ENSG00000103550	KNOP1	395.851585876613	0.151327998887199	0.15008350448664	0.29463948309953203	0.9999999977608524	1	1	0.2857762662393585	0.9999999969026439	1	1
ENSG00000103569	AQP9	25.354145652824	0.0112918248116501	0.0108483710850205	1.9830734665493566e-7	3.697486522313831e-4	0.047340642267572175	0.5171573200271262	1.661291652022001e-7	2.888329489619812e-4	0.03812958534002431	0.46276972909190783
ENSG00000103591	AAGAB	91.6913619702904	0.0396641885152612	0.0282100106822867	1.6649778776556268e-4	0.348454635814302	0.9978663619916972	0.9999999996794787	2.1894760883323094e-5	0.08139656510513693	0.9072318589885255	0.9999782265022893
ENSG00000103642	LACTB	575.467259408534	0.205857270362126	0.146598747447541	0.6941935211828592	0.9999999999999997	1	1	0.26147358340025406	0.9999999923851093	1	1
ENSG00000103647	CORO2B	285.152183660637	0.113826291879785	0.114263251323047	0.08500576173809393	0.9999823683206587	1	1	0.0866375992178533	0.9999839491803307	1	1
ENSG00000103653	CSK	60.4209044755993	0.0264955054380601	0.00284737583037034	1.5279001782220192e-5	0.05908263102196509	0.8577943542917371	0.9999093117325509	1.6757097931474618e-9	2.06067422570122e-7	1.2642907926685432e-5	3.8994597814090426e-4
ENSG00000103657	HERC1	94.3780996953585	0.0407790324786522	0.0251010790915665	1.97233917633155e-4	0.38222747599633855	0.9986282062725148	0.9999999999044032	1.1248189116574991e-5	0.04436759452421324	0.8046940694040879	0.9997259796797513
ENSG00000103671	TRIP4	198.678724692521	0.0821434953986203	0.0258553050390007	0.014333501484647404	0.9930269364771177	0.9999999999997983	1	1.329591719323453e-5	0.05195904222430603	0.8349296230276994	0.9998483786239526
ENSG00000103707	MTFMT	30.9337208732479	0.0137426173797988	0.00119788948654856	4.895955367789639e-7	0.0012486589182836294	0.12675921775697607	0.7747864999066137	2.617351890776831e-10	7.534442070245007e-9	1.616540674653777e-7	2.588243848467009e-6
ENSG00000103769	RAB11A	19.3720512280108	0.00865066223247171	0.00601342563745611	6.396066443148385e-8	7.28950183965793e-5	0.010454221624158766	0.20786974451211826	1.6180421114064814e-8	8.858906160202906e-6	0.0011336749609749397	0.03518879091385818
ENSG00000103811	CTSH	1972.71240037445	0.470509830390052	0.471623102196764	0.999992283896144	1	1	1	0.9999927428047918	1	1	1
ENSG00000103876	FAH	77.6326426537863	0.0337881005051007	0.0187516110257085	6.321448027168941e-5	0.1881111547315505	0.9822030558695961	0.9999998672850056	2.308043388188352e-6	0.008371991241785781	0.42563114234774113	0.9793704199881725
ENSG00000103888	KIAA1199	34.6147391689357	0.0153528399187592	0.01593699415669	8.367784806173617e-7	0.002478136584925017	0.20641249396559003	0.8828646212617893	1.006699841932246e-6	0.003118425456331897	0.24012476341511502	0.9101553090350201
ENSG00000103932	RPAP1	485.629775132671	0.179488627600152	0.0774123935830455	0.5081752787505246	0.9999999999990457	1	1	0.010105707952817511	0.9855094992998953	0.9999999999956283	1
ENSG00000103942	HOMER2	258.173296921678	0.104178871284899	0.0792728375029036	0.05400045871235437	0.9998696242904488	1	1	0.011631330747746138	0.9890691779999216	0.9999999999986798	1
ENSG00000103966	EHD4	550.864780136993	0.198806085409104	0.176135975450992	0.6482387881578576	0.9999999999999969	1	1	0.4825034432884986	0.9999999999974981	1	1
ENSG00000103978	TMEM87A	86.1763474045119	0.0373676312748152	0.00544685954187504	1.1584926820229491e-4	0.2814448444274382	0.9948983209900931	0.9999999963681406	1.1498676788512796e-8	5.136978358910582e-6	6.136695307056295e-4	0.020184984093424285
ENSG00000103995	CEP152	270.539346923058	0.108626810998708	0.108114603519654	0.06711951019197815	0.9999472409448529	1	1	0.06550813070713968	0.9999413555839715	1	1
ENSG00000104043	ATP8B4	323.5193104026	0.127193573518179	0.123578908317839	0.1441154453177258	0.9999991174515022	1	1	0.12626162262413998	0.9999979684196478	1	1
ENSG00000104064	GABPB1	35.2474017996287	0.0156290621470186	0.0122987583597686	9.137657344115979e-7	0.0027658601307423147	0.2220677319928377	0.8964851422074677	2.916459433954799e-7	6.272391706000358e-4	0.07387747454041371	0.6344347901263565
ENSG00000104081	BMF	129.945227281828	0.055297130236578	0.0514588901181782	0.0012953835501775535	0.7815148558475102	0.9999983235492167	1	8.290898473667374e-4	0.6940572997084342	0.9999884463915585	0.9999999999999997
ENSG00000104093	DMXL2	48.3670247590145	0.0213223981089008	0.0198531486257791	4.569687476863038e-6	0.017829860579207213	0.6002106236384749	0.9958222896023962	3.117183578038585e-6	0.011752849839809287	0.5019912011741761	0.9893014665383316
ENSG00000104129	DNAJC17	72.8887879692737	0.0317890638009655	0.00660348095376432	4.400342952803893e-5	0.14392416009435782	0.9664036531360353	0.9999991097442624	2.263333120922084e-8	1.501290327043936e-5	0.0020242651971984493	0.05813929773894799
ENSG00000104133	SPG11	33.3886762794157	0.0148170959723397	1.5182546413512e-4	7.032344399027224e-7	0.0019902065241036437	0.17762550059397864	0.8525240022625497	2.7401636515378414e-11	9.450984439496324e-11	3.319963193249009e-10	1.1276406475246858e-9
ENSG00000104177	MYEF2	746.998404063304	0.251769061634913	2.79463774665069e-5	0.9013890477507063	1	1	1	1.5802692487909553e-11	2.3386514946821535e-11	3.858324770789068e-11	6.59650112311283e-11
ENSG00000104205	SGK3	26.0394637781395	0.0115935023395972	0.0111557814117114	2.2311314928913362e-7	4.351601954305506e-4	0.05444590288001139	0.5534531179241261	1.8791547118368612e-7	3.431021724702443e-4	0.044362167100054584	0.5005708909213361
ENSG00000104219	ZDHHC2	556.590389079102	0.20045822792886	0.190330207777379	0.6593047641833838	0.9999999999999981	1	1	0.5889158451204202	0.9999999999999605	1	1
ENSG00000104228	TRIM35	925.04392868272	0.294127506533802	0.222309291946392	0.9745492974287769	1	1	1	0.7871779342342852	1	1	1
ENSG00000104267	CA2	490.413933800967	0.180936914352869	0.176338427368329	0.5191891842062455	0.9999999999993726	1	1	0.48405932163851817	0.9999999999976389	1	1
ENSG00000104290	FZD3	167.777430154335	0.0702651042913536	0.0691653692087094	0.005649548070196908	0.9601965641081192	0.9999999996273928	1	0.005133779881120182	0.9539944923447936	0.9999999992782515	1
ENSG00000104312	RIPK2	246.276991344695	0.0998577987018468	0.0849737595302642	0.043082211206917576	0.9996954630967463	1	1	0.017451890246264035	0.9955978330934682	0.9999999999999695	1
ENSG00000104320	NBN	21.0278058830571	0.00938310797744487	1.36764404769675e-5	8.930263839523889e-8	1.1898031073165338e-4	0.01683635649454973	0.28610381835150167	1.4618195542936974e-11	1.810585015249444e-11	2.4493296280070354e-11	3.4723779407386246e-11
ENSG00000104324	CPQ	367.758920015036	0.142114830392662	0.134988676223264	0.23145971908827223	0.9999999762465507	1	1	0.1871439701735057	0.9999998619013084	1	1
ENSG00000104325	DECR1	898.966406601785	0.288225741931359	0.266478409529633	0.9687553650991321	1	1	1	0.9364042539969776	1	1	1
ENSG00000104331	IMPAD1	28.2053311854787	0.0125457095907721	0.012323133761696	3.195534560296309e-7	7.095153076317473e-4	0.08165421605890288	0.6611171232547286	2.9430439163480315e-7	6.349844183138886e-4	0.07462221539742597	0.6371116740276339
ENSG00000104341	LAPTM4B	1114.07331729792	0.334147815981688	0.322124342835767	0.994428634576415	1	1	1	0.9910047566171551	1	1	1
ENSG00000104343	UBE2W	109.549719734887	0.0470261350538397	0.0466117068366554	4.744160493136418e-4	0.5727152172141292	0.999906072506077	0.9999999999999234	4.491372825301543e-4	0.5605062325627908	0.9998866332207001	0.999999999999875
ENSG00000104361	NIPAL2	1734.67825324921	0.438639540858723	0.436398162317888	0.9999574275196568	1	1	1	0.9999521643366656	1	1	1
ENSG00000104365	IKBKB	54.1373192533418	0.0238056509582792	0.0125099382462533	8.362128480876585e-6	0.03323548253374842	0.7442465306065682	0.9992694719615933	3.15374862558393e-7	6.970630844851389e-4	0.08049578365729282	0.6573136817044667
ENSG00000104381	GDAP1	62.685337654713	0.0274612258731716	0.0274074555316478	1.8752075326089468e-5	0.07105888960846185	0.887653676458759	0.999959039209586	1.8542214788364042e-5	0.07035226835820352	0.8861313778519068	0.9999571599268949
ENSG00000104388	RAB2A	415.750440768807	0.15773513089029	0.14462822310836	0.3415562499122369	0.9999999995894612	1	1	0.24809832466070314	0.9999999874107917	1	1
ENSG00000104412	EMC2	57.2221454047555	0.0251280471341916	0.0249773530921747	1.1316408020656255e-5	0.04462450803341744	0.8058378033130127	0.9997316474699376	1.0939740343718363e-5	0.0432024489823013	0.7993868043508797	0.9996984783721881
ENSG00000104419	NDRG1	263.021942475798	0.105928158739323	0.106043839731964	0.058926202255775495	0.9999083161634513	1	1	0.05926251564529017	0.9999104415259199	1	1
ENSG00000104442	ARMC1	92.9157738528325	0.0401725713072787	0.0213713977194877	1.7996365057082464e-4	0.3637816225945064	0.9982530553873272	0.9999999998149286	4.6267901069318995e-6	0.018067560617247236	0.6033578881757452	0.99595619465442
ENSG00000104447	TRPS1	37.6924842868772	0.0166951365383948	0.0165741173689155	1.270891695215326e-6	0.004145613043753937	0.2870009065686564	0.937662914494024	1.2250997621920945e-6	0.003965329418143981	0.27930909639978596	0.9338130373249091
ENSG00000104450	SPAG1	1426.21245178079	0.391149026734368	0.36379925846204	0.9995477499440851	1	1	1	0.9984178178427122	1	1	1
ENSG00000104472	CHRAC1	13.365411516803	0.00598442666295518	0.00144462769240892	1.5907682837656978e-8	8.623516252193042e-6	0.001100186330762587	0.03426519004509199	3.687221639125937e-10	1.4078296417530112e-8	3.771122533136051e-7	7.101915467377928e-6
ENSG00000104490	NCALD	139.998926329001	0.0593216059410548	0.0569142427673282	0.00200127840781128	0.8533428750394013	0.999999800783786	1	0.001548735145902258	0.8128235082870886	0.9999992786486639	1
ENSG00000104497	SNX16	764.775809595388	0.256225545361499	0.239685567607057	0.9133398056027735	1	1	1	0.8623370628705935	1	1	1
ENSG00000104518	GSDMD	235.212333628942	0.0958012186592778	0.017046368121162	0.03436463070792373	0.9993437194622721	1	1	1.4122387144155368e-6	0.004706945384606809	0.30971612083110456	0.9477888321588255
ENSG00000104549	SQLE	34.2315683864119	0.0151854711230555	0.0153542961243744	7.928994659733846e-7	0.0023161381317764462	0.19718981988258977	0.8739557856943386	8.37169228939949e-7	0.002479585988013011	0.20649362361339663	0.8829399256571865
ENSG00000104613	INTS10	298.08261438301	0.118376820792294	0.0827225583088164	0.10299354827139484	0.9999934597869634	1	1	0.014933304727290597	0.9936447395523095	0.9999999999998626	1
ENSG00000104626	ERI1	59.0238570723082	0.0258987447143848	0.0221808130626492	1.3423061681283599e-5	0.05242235462495071	0.8365613389419598	0.9998535262567226	5.663333027206008e-6	0.022356176574406583	0.6537612824073591	0.9976647679766364
ENSG00000104643	MTMR9	41.9495836387061	0.0185457642124912	0.0205752894219576	2.1789379054393265e-6	0.007836327389094344	0.41134674679369443	0.9767893087948342	3.771371012706304e-6	0.014494923225967127	0.5510831291703242	0.99320039651229175
ENSG00000104660	LEPROTL1	130.315450712866	0.0554459405325103	0.0428843682542325	0.0013171476590801978	0.7845349592256923	0.9999984476033477	1	2.6860435748032874e-4	0.44704686655772163	0.9994227562945917	0.999999999990773
ENSG00000104671	DCTN6	65.3129951165533	0.0285794529047529	0.0256820215362608	2.3605866124709607e-5	0.08684277298681087	0.9158275047954626	0.9999841366559411	1.2799017171105653e-5	0.05013946425277893	0.8283026237391176	0.9998260651002372
ENSG00000104679	R3HCC1	11.0780708017344	0.00496534430897504	0.00416610004165797	8.455241395921576e-9	3.124045888536209e-6	3.4619535746460706e-4	0.011781613390455803	4.868308089989171e-9	1.2591241060899705e-6	1.182609509680077e-4	0.004099204967511927
ENSG00000104689	TNFRSF10A	256.781659301961	0.103675533262117	0.0819312514388406	0.052638125578984396	0.9998558554330665	1	1	0.014118406198785016	0.9927870050417409	0.999999999999768	1
ENSG00000104695	PPP2CB	954.282584696017	0.30062937348327	0.279772417220602	0.9798147168520649	1	1	1	0.958460003935215	1	1	1
ENSG00000104714	ERICH1	1015.69963771307	0.313904178828832	0.306297941288221	0.9876550896570891	1	1	1	0.9835885524822929	1	1	1
ENSG00000104728	ARHGEF10	768.014584285358	0.257031738842414	0.257986750886742	0.9153710246718771	1	1	1	0.9177269416019852	1	1	1
ENSG00000104731	KLHDC4	1925.55777916055	0.464487020019407	0.259291506782679	0.9999892690635107	1	1	1	0.9208589220779336	1	1	1
ENSG00000104738	MCM4	128.121420258316	0.0545633710220237	0.0467851351086063	0.0011924064800286072	0.76621172137656135	0.9999975561444069	1	4.595734289015718e-4	0.5656294442384622	0.9998951973323861	0.9999999999998981
ENSG00000104756	KCTD9	54.2839870314036	0.0238686053900682	0.0235091430341529	8.485872560637375e-6	0.033723496005914955	0.7474320027670938	0.9993027143073735	7.80002770950361e-6	0.03100655088219506	0.7289096056344802	0.9990916788148734
ENSG00000104763	ASAH1	1557.2021770488	0.412263390747453	0.388600844511867	0.9998373052502786	1	1	1	0.999489994826235	1	1	1
ENSG00000104765	BNIP3L	35.9786524727445	0.0159481351622316	0.0176841307776527	1.0102091738684038e-6	0.003131840789889373	0.2407894658567693	0.9106212149346847	1.703720280521459e-6	0.005883063070892591	0.35221340119086175	0.9626257187757538
ENSG00000104774	MAN2B1	550.957696610755	0.198832951251709	0.0137972535584978	0.6484201287771214	0.999999999999997	1	1	4.989211446204678e-7	0.0012797600833331924	0.12911282950453984	0.7793029701104924
ENSG00000104783	KCNN4	2213.47148069995	0.499263723773969	0.370490402988701	0.9999984697700739	1	1	1	0.9988262255090846	1	1	1
ENSG00000104805	NUCB1	776.186752078475	0.259058201742608	0.0699416317745528	0.920306163603083	1	1	1	0.005493686379034246	0.9584519148992682	0.99999999954711	1
ENSG00000104812	GYS1	105.122469540056	0.0452115838701825	0.00824022242807019	3.719923058462804e-4	0.5185019437371072	0.9997881731567576	0.9999999999993558	5.263465741034423e-8	5.453529927079703e-5	0.007822997360515838	0.16906032940793536
ENSG00000104823	ECH1	99.7400665967099	0.0429962253240892	0.011408448576626	2.7294214387840743e-4	0.45050275523020655	0.9994493187016729	0.9999999999918664	2.0760213370607516e-7	3.9396974644423377e-4	0.05000466615720023	0.5312771384718451
ENSG00000104825	NFKBIB	20.1873082399318	0.00901143764437829	0.00802641525330123	7.555173819895344e-8	9.318785722556289e-5	0.013302877319085638	0.2451156667151977	4.743830062103882e-8	4.665959807548248e-5	0.00667894883397302	0.15049554034439827
ENSG00000104833	TUBB4A	353.643045280294	0.137409516027806	0.129724154200493	0.20169687900385636	0.9999999235433971	1	1	0.1574199587640086	0.9999995126281795	1	1
ENSG00000104852	SNRNP70	46.6201917097803	0.0205681533590386	0.00691442483386893	3.7643685012467287e-6	0.014465594186790831	0.5506046648871685	0.9931692890938515	2.681484534416967e-8	1.953641453167343e-5	0.002688761043265764	0.07368131592325333
ENSG00000104863	LIN7B	69.0225222785202	0.0301537104186351	0.00680377057214965	3.225476859636256e-5	0.1126502983205937	0.945478308983114	0.9999960270204344	2.5258702796016053e-8	1.780790257599474e-5	0.0024343210688546613	0.06786298649164568
ENSG00000104866	PPP1R37	75.5973491995675	0.0329314499452297	0.00385035362829749	5.4246332437446476e-5	0.16840186481519748	0.9764995333217941	0.9999996970388669	3.848119822791318e-9	8.498976196147368e-7	7.35353609825351e-5	0.0025268627330913285
ENSG00000104870	FCGRT	90.3905370618073	0.0391234882639191	0.0113234243641262	1.5313001107986057e-4	0.33231881886567616	0.9973679442412993	0.9999999994278294	2.0079001938899665e-7	3.761831151207762e-4	0.0480522909660398	0.5209929270522227
ENSG00000104880	ARHGEF18	313.760819528422	0.123832059091836	0.0109823583426985	0.1274673251165065	0.9999980825737409	1	1	1.7534427432241984e-7	3.115133696003358e-4	0.040762678315996004	0.4792873127005959
ENSG00000104881	PPP1R13L	131.713162294175	0.0560073245351419	0.0348207116042687	0.0014020186670559154	0.7956744356736857	0.9999988399693397	1	7.5692892789192e-5	0.21331995540990756	0.9874103143723179	0.9999999518457416
ENSG00000104883	PEX11G	869.238753805022	0.281376359381216	0.0574802508975393	0.9606128370785212	1	1	1	0.0016466125485069538	0.8229986453736476	0.999999465186853	1
ENSG00000104884	ERCC2	112.047767838195	0.0480469437133629	0.0241348035167793	5.418671041186318e-4	0.6022542439309329	0.9999412469591804	0.9999999999999774	9.026760923402932e-6	0.03584526876711247	0.7606241839686727	0.9994280626415296
ENSG00000104886	PLEKHJ1	105.511647857342	0.0453713693305116	0.041470626541856	3.8018402706663235e-4	0.5233464096724854	0.9998025973378267	0.9999999999994651	2.186358455408266e-4	0.40342624097111135	0.9989630993587624	0.9999999999553127
ENSG00000104889	RNASEH2A	80.1686591369204	0.0348533829545359	3.06767344846081e-16	7.611992503531173e-5	0.21414220573635057	0.9875498550716075	0.9999999533811932	1.3510859098175843e-11	1.3510859098175843e-11	1.3510859098175843e-11	1.3510859098175843e-11
ENSG00000104892	KLC3	102.013308099823	0.0439331280936129	0.0371621924819878	3.116748272855574e-4	0.4794009983305104	0.9996304563624118	0.9999999999971925	1.120451866409855e-4	0.27567497212466907	0.9944988120725179	0.9999999955069989
ENSG00000104894	CD37	202.795943488871	0.0837032701965156	5.46112160745409e-4	0.015993323634669765	0.9945773252016741	0.9999999999999284	1	8.289768871350134e-11	8.782854443722954e-10	8.179576904687735e-9	6.661225993020992e-8
ENSG00000104918	RETN	313.366828912908	0.123695796967302	0.104843338296916	0.1268174964179163	0.9999980219285352	1	1	0.05583635914671703	0.9998858788623196	1	1
ENSG00000104921	FCER2	96.0388045805559	0.0414668374254415	0.0335528782439025	2.18513404859344e-4	0.403309729253545	0.9989614956126468	0.9999999999551252	6.06335838893024e-5	0.18258738812869857	0.9807752684120483	0.9999998332864233
ENSG00000104936	DMPK	679.016931682306	0.234223168640919	5.09980795120783e-5	0.8412294513666272	1	1	1	1.7780221739371882e-11	3.303590734304862e-11	6.787537198960081e-11	1.4137602200037236e-10
ENSG00000104951	IL4I1	19.887465106713	0.00887877869603842	0.00384364468758517	7.109916910774672e-8	8.522558654788792e-5	0.012192552485988606	0.2311052479102521	3.8284819758871436e-9	8.426280641016248e-7	7.277080358281118e-5	0.0024998466117375218
ENSG00000104957	CCDC130	150.496899557885	0.0634874905704173	0.0523766768925239	0.0030409492697651697	0.9073926449896131	0.9999999802419995	1	9.251926686449918e-4	0.7166050270721498	0.9999926490023877	0.9999999999999999
ENSG00000104960	PTOV1	202.44001216632	0.0835686378814736	0.01129141683878	0.015844459373357433	0.9944572476221595	0.9999999999999217	1	1.9827546560158282e-7	3.6966619328548944e-4	0.04733150355889104	0.5171077545674412
ENSG00000104969	SGTA	85.9606600758265	0.0372775917491151	0.0307047690882951	1.1416862027835428e-4	0.2789107704414865	0.9947266442662527	0.9999999960127945	3.5867489203034175e-5	0.12268343025207584	0.9535148401459009	0.9999975845708073
ENSG00000104970	KIR3DX1	626.221527114073	0.220018547800469	0.127129776699263	0.7754966104862796	1	1	1	0.14378852459350644	0.9999991042359286	1	1
ENSG00000104972	LILRB1	271.936307700795	0.109126508113564	0.0844618146990391	0.06871722204131825	0.9999524314117695	1	1	0.0168523448306116	0.9952101402517572	0.9999999999999569	1
ENSG00000104974	LILRA1	522.850364415548	0.19062299978109	0.0337762533799306	0.5910296867355059	0.9999999999999638	1	1	6.308227079054873e-5	0.18783095660819205	0.9821334798844843	0.9999998657482622
ENSG00000104979	C19orf53	417.777241867049	0.158382305842984	0.0632494304933676	0.3463970479479813	0.9999999996549296	1	1	0.0029715310621765134	0.9048084484428225	0.9999999773903068	1
ENSG00000104980	TIMM44	209.253555088613	0.0861390342108524	0.0820159667255148	0.01887762916276947	0.9963743826820952	0.9999999999999861	1	0.014203956540094431	0.9928836660310172	0.9999999999997805	1
ENSG00000104983	CCDC61	155.556928361434	0.0654822986998384	0.0587749667734873	0.003676547292226995	0.9268924653897507	0.9999999936964353	1	0.0018899536448158116	0.8447692152829841	0.999999732321748	1
ENSG00000104998	IL27RA	211.62204620973301	0.0870291690847253	0.0796547730493251	0.020025484561899343	0.9968795857682522	0.9999999999999925	1	0.01196578049091468	0.9896933846505881	0.9999999999989696	1
ENSG00000105011	ASF1B	16.1990333597269	0.0072440033816619	0.00811605118576636	3.193209663354679e-8	2.5569703284933354e-5	0.0035791866083750845	0.09294572887659125	4.9561580173218545e-8	4.9833198799364986e-5	0.007141013763292903	0.15813541108748042
ENSG00000105048	TNNT1	1763.69219422114	0.442728029233685	0.442701838309401	0.999965624087484	1	1	1	0.999965576789271	1	1	1
ENSG00000105053	VRK3	643.415017400695	0.224701977705196	0.215478576656221	0.7989333128075813	1	1	1	0.7511173592743295	1	1	1
ENSG00000105058	FAM32A	12.5135965311198	0.0056051602778874	0.0052475291089786	1.2676344307571696e-8	6.006565061222879e-6	7.329465293002269e-4	0.023763964308416874	1.0145288387164442e-8	4.198260721177682e-6	4.871435277458147e-4	0.016280708385549292
ENSG00000105063	PPP6R1	54.1235330089473	0.0237997330502689	0.00197045135281505	8.35057670145467e-6	0.033189876079997904	0.7439458032294151	0.9992662709837827	6.966744958702975e-10	4.417421239910624e-8	1.7285818755263804e-6	4.1905992790081115e-5
ENSG00000105072	C19orf44	254.018869996037	0.102674588733611	0.0391011834317841	0.05000091855660305	0.9998242178994589	1	1	1.5259888404162147e-4	0.3316572727191106	0.9973452132547783	0.9999999994140475
ENSG00000105135	ILVBL	118.539149375127	0.0506894012900327	0.0479620062109536	7.551161012711027e-4	0.6744076847030614	0.9999831997881772	0.9999999999999991	5.359620217105787e-4	0.5998277090284769	0.9999388887876924	0.9999999999999749
ENSG00000105136	ZNF419	85.8075575304676	0.0372136682656934	0.0321842385647937	1.12988161795613e-4	0.27711667456939604	0.994601540372043	0.9999999957399721	4.733981259363862e-5	0.15215198727906143	0.9702587355721886	0.9999993849880406
ENSG00000105171	POP4	34.8726813875221	0.0154654769093497	0.0157028166983905	8.674699222277482e-7	0.002592329344977884	0.21273223023289844	0.8885787654935312	9.353240300047361e-7	0.002847163289558252	0.2263361645195967	0.8999012439091683
ENSG00000105173	CCNE1	37.5504608537388	0.016633276422773	0.0170305065456638	1.2473039412430609e-6	0.00405264387649984	0.2830600323400242	0.9357190785566227	1.4055755155339966e-6	0.00468033304246962	0.3086785581951489	0.9473636156678354
ENSG00000105185	PDCD5	502.31840593171	0.184518609152111	0.166457254806969	0.5461664786317403	0.9999999999997794	1	1	0.40784691144963026	0.9999999999618794	1	1
ENSG00000105186	ANKRD27	936.596025435457	0.296710766245818	0.274073545197321	0.9767715904147848	1	1	1	0.9499725285838017	1	1	1
ENSG00000105204	DYRK1B	92.5965222252182	0.0400400680945937	0.032435594280023	1.763673952993594e-4	0.359773752150647	0.9981591572953067	0.9999999997863609	4.957331768673523e-5	0.15751812862942582	0.972503910369813	0.999999514722047
ENSG00000105221	AKT2	16.2691948725416	0.00727515046482087	0.0067486456773009	3.245525148631856e-8	2.6215057869150016e-5	0.0036745037891540155	0.09491828824043702	2.4512053387049093e-8	1.6997215393610432e-5	0.0023151799073549695	0.06508389643157442
ENSG00000105223	PLD3	199.803478882574	0.0825701263041574	0.031556207036629	0.014773559593664998	0.9934871883507015	0.9999999999998479	1	4.213385478513132e-5	0.13919662674557087	0.9639337158646599	0.9999988946218662
ENSG00000105227	PRX	1279.46351679744	0.365617046914766	0.0552350375065167	0.9985403425326559	1	1	1	0.0012863914086006512	0.7802463524678069	0.9999982689751297	1
ENSG00000105245	NUMBL	132.212740180283	0.0562078156970401	0.0261429419180721	0.001433412659694766	0.7995555275640733	0.9999989551356713	1	1.4157523530955451e-5	0.055080847123893384	0.8455150916983099	0.999879485614672
ENSG00000105248	CCDC94	42.5802394708355	0.0188193279195234	0.0150964997398537	2.3519322309706325e-6	0.008554436620141659	0.4303359284115704	0.980161835833751	7.703900315458867e-7	0.0022336452942114393	0.19237072712304337	0.8690121929558331
ENSG00000105254	TBCB	303.230436860331	0.120175483154698	0.0888058165558685	0.1107123306148815	0.9999956161974599	1	1	0.022474794462831515	0.9976978505600875	0.9999999999999978	1
ENSG00000105255	FSD1	69.855570163816	0.0305065398333479	0.015296262465781	3.4529728962562345e-5	0.11901473108937866	0.9507488030111119	0.9999971088669138	8.217177752678495e-7	0.002422361599372147	0.20327215732369897	0.8799095479686455
ENSG00000105258	POLR2I	44.6445416249463	0.0197137081799657	0.00516249534189572	3.0028580659813287e-06	0.011273750965017038	0.49238619443532616	0.9883468063332093	9.609245621433615e-9	3.845342601338508e-6	4.403174815531541e-4	0.014804683701960641
ENSG00000105270	CLIP3	522.25077888351	0.190446031743363	0.0593767731767956	0.5897525475798227	0.9999999999999618	1	1	0.00201280872713272	0.854188082013551	0.9999998066550562	1
ENSG00000105278	ZFR2	347.126929745442	0.135220010246967	0.123257401963889	0.188511271096218	0.99999986944766	1	1	0.12474012623632846	0.9999978138627911	1	1
ENSG00000105281	SLC1A5	226.204182251033	0.0924715049922269	0.068022724235825	0.02823689348072922	0.9987938831107447	0.9999999999999998	1	0.004638926257162113	0.9466922013956192	0.9999999985750766	1
ENSG00000105287	PRKD2	722.591214801818	0.245562894080238	0.101719508554169	0.8825975295764407	1	1	1	0.047572742462007156	0.9997879010198114	1	1
ENSG00000105289	TJP3	61.9710292243938	0.0271567992891903	0.0152342569146563	1.7590442637605008e-5	0.06712073506652005	0.8788213190612664	0.9999472451592706	8.054803715129566e-7	0.0023624285727504857	0.19985707957968846	0.876604897583103
ENSG00000105298	CACTIN	25.686867267444	0.0114383121003419	0.00467852262671052	2.1004110639655238e-7	4.0038390910301924e-4	0.05070349378046202	0.5348759551389263	6.980743316731264e-9	2.284031041854817e-6	2.400371606546825e-4	0.00827224306986618
ENSG00000105321	CCDC9	142.00747298442	0.0601215172299994	0.0473569730449825	0.0021739244728898877	0.865243276625789	0.999999871131496	1	4.954507516095052e-4	0.5823755694232504	0.9999192490328724	0.9999999999999483
ENSG00000105327	BBC3	52.1899642563397	0.0229690145090579	0.0116304805107188	6.859564475658608e-6	0.02723306288165117	0.6995864178632386	0.9986580606064348	2.2632832263891345e-7	4.438137396484132e-4	0.05536531949368306	0.5578462551169523
ENSG00000105339	DENND3	139.565690123122	0.0591488894364452	0.057354735773663	0.001965532543746207	0.8506730301411052	0.9999997812509152	1	0.001624475842094908	0.8207770693423322	0.9999994283957216	1
ENSG00000105341	ATP5SL	61.0602952931175	0.0267683828520943	0.0198396260120151	1.619886033565887e-5	0.06231456536624669	0.8667827826129766	0.9999273834322686	3.105934547775746e-6	0.011705700480001635	0.5010611212351792	0.9892121010424137
ENSG00000105352	CEACAM4	2142.23765780555	0.491086874639291	0.424551154713146	0.9999975584385212	1	1	1	0.9999121326728597	1	1	1
ENSG00000105355	PLIN3	60.7523842906699	0.0266369925596129	0.0280358156485983	1.5750154835347807e-5	0.060743610333655496	0.8625103338960809	0.9999191631635517	2.1125805713784196e-5	0.07890825993425388	0.9029407906674451	0.9999747482027588
ENSG00000105364	MRPL4	117.315813128652	0.0501925381541046	0.017787964390948	7.103661821402651e-4	0.6613741828650046	0.9999786548944509	0.9999999999999983	1.7557709948157196e-6	0.006095181803999927	0.3592557098333974	0.964658354908754
ENSG00000105370	LIM2	89.6840784815507	0.0388295868327202	0.00109923078639303	1.4625684103775072e-4	0.3236299298652391	0.997053314746238	0.9999999992175764	2.2580837200081305e-10	5.743915898470675e-9	1.1157795110072755e-7	1.6565736212781346e-6
ENSG00000105372	RPS19	76.1562350450181	0.0331668350274627	0.007749518514212	5.6594033244095066e-5	0.17370461454425024	0.9782094424512809	0.9999997581676979	4.135566733509677e-8	3.7928680093224365e-5	0.005400963752820953	0.1282339985245028
ENSG00000105374	NKG7	70.7457271997332	0.030883273669232	8.72640686689852e-4	3.711009454809844e-5	0.1260441460552617	0.9558908697074943	0.9999979470647422	1.5621959281730824e-10	2.9023907721636988e-9	4.3563705642846173e-08	5.280147146180525e-7
ENSG00000105379	ETFB	42.6808615473767	0.018862961309616	0.0143736351370947	2.3805917718222602e-6	0.008673659848539517	0.43336839980214337	0.9806573287646496	6.069706482980664e-7	0.0016491485863345812	0.1554797631142394	0.8232503131482534
ENSG00000105383	CD33	401.024256261246	0.153002878665948	0.148614720152686	0.3067068645624229	0.9999999985568658	1	1	0.2754368232217722	0.9999999954672835	1	1
ENSG00000105393	BABAM1	53.9439164145045	0.0237226239508852	3.2125832532802e-6	8.201314135480864e-6	0.03259982966084751	0.7400072837565628	0.9992233288786995	1.3768541862191341e-11	1.4550471938434839e-11	1.5884071835614577e-11	1.7815526831554962e-11
ENSG00000105397	TYK2	168.202898139294	0.0704307403153832	0.0353988832097299	0.0057307274566669175	0.9610651737067917	0.9999999996628932	1	8.356172373802373e-5	0.2280839030321311	0.9896817872037997	0.9999999729413892
ENSG00000105401	CDC37	26.1452947424814	0.0116400727965726	0.00576717054233432	2.2716878211870295e-7	4.460821570438922e-4	0.05560557500557328	0.5589836140523421	1.3982836000181464e-8	7.025332668608719e-6	8.74649336693123e-4	0.027902159555939
ENSG00000105404	RABAC1	180.955702276509	0.0753681969662883	0.0288377577268578	0.008616356379997137	0.9804212504481272	0.9999999999840079	1	2.4869629681512073e-5	0.09078769597862912	0.9214437856384089	0.9999873113772334
ENSG00000105426	PTPRS	142.067744320369	0.0601454994938114	0.0609448969921341	0.0021792847404654703	0.8655883933424435	0.9999998728112689	1	0.0023643111710586195	0.8767108169385168	0.9999999180323188	1
ENSG00000105429	MEGF8	10.6292148918808	0.00476511955502025	0.0048948753847473	7.401834700715426e-9	2.514127223518514e-6	2.686701394465363e-4	0.009229965855705125	8.07138866854018e-9	2.8962593618953036e-6	3.169908539283339e-4	0.010827261350122686
ENSG00000105443	CYTH2	191.336392306495	0.0793486934950117	0.0377519778193524	0.011697164775599123	0.9891958200318587	0.9999999999987432	1	1.2326383345417913e-4	0.2923511586970453	0.9955746177659266	0.9999999975655889
ENSG00000105447	GRWD1	226.926045726344	0.0927392334241894	0.054525786933821097	0.02869711304969147	0.9988506295226118	0.9999999999999999	1	0.0011873217199980246	0.7654094973222506	0.9999975087515199	1
ENSG00000105472	CLEC11A	372.82427698608	0.143790799976408	0.143905050805972	0.24250057632725042	0.999999984432731	1	1	0.24326116129320963	0.9999999848765178	1	1
ENSG00000105479	CCDC114	577.663489781998	0.206480690723462	0.0578481830538551	0.6980908073623644	0.9999999999999997	1	1	0.0017129528470645194	0.8293971543802939	0.999999560203611	1
ENSG00000105483	CARD8	675.868520886919	0.233390610109578	0.21348915378807	0.8378133134419689	1	1	1	0.7399248130472693	1	1	1
ENSG00000105486	LIG1	168.192259044308	0.0704265992016965	0.0459740288505498	0.005728686470634625	0.9610436587228143	0.9999999996620477	1	4.124720353317901e-4	0.5415078386055165	0.9998489901894024	0.9999999999997353
ENSG00000105497	ZNF175	327.761670419936	0.128646911610815	0.127412031955053	0.1516764228972297	0.9999993718388231	1	1	0.14523809969244905	0.9999991612793785	1	1
ENSG00000105499	PLA2G4C	3969.6990628597	0.64133959059160806	0.525365655263269	0.9999999997962233	1	1	1	0.9999996679479766	1	1	1
ENSG00000105501	SIGLEC5	1296.68313022033	0.368723334518652	0.238237387897928	0.9987292864091109	1	1	1	0.8569592475657922	1	1	1
ENSG00000105507	CABP5	132.019060006581	0.0561300978599263	0.0423703732138809	0.0014211743884852135	0.7980571422820228	0.9999989118819583	1	2.494178284896398e-4	0.431166312227776	0.9992842711217781	0.9999999999835681
ENSG00000105514	RAB3D	294.14739171403	0.116996876429545	0.0110444590283138	0.09730588399906115	0.9999911375034662	1	1	1.797608136788753e-7	3.225280323869706e-4	0.04202651924453926	0.4869236139178732
ENSG00000105518	TMEM205	146.718109454258	0.0619922198880246	1.73629040058296e-16	0.002626153360440364	0.8901900462050476	0.999999954171988	1	1.3510859098175843e-11	1.3510859098175843e-11	1.3510859098175843e-11	1.3510859098175843e-11
ENSG00000105519	CAPS	558.783480964102	0.20108924815194	0.0772804141499221	0.6634845517523938	0.9999999999999984	1	1	0.010003801701878201	0.9852210453871862	0.9999999999952436	1
ENSG00000105520	DKFZP761J1410	430.642655995757	0.162467262428469	-4.39892499319544e-16	0.3772784752243167	0.9999999998858614	1	1	NaN	NaN	NaN	NaN
ENSG00000105552	BCAT2	232.633218954718	0.0948503906563997	0.0617907646816508	0.03252367854354221	0.9992175733857463	1	1	0.0025740152908724223	0.8876913019159293	0.9999999487229613	1
ENSG00000105556	MIER2	34.1448261709917	0.0151475742705458	0.0152405213681271	7.832435386934122e-7	0.002280698597369235	0.19512997673898202	0.8718679169711467	8.071082167049326e-7	0.0023684275144071343	0.20020083728873084	0.8769419255706714
ENSG00000105559	PLEKHA4	89.4787920353426	0.0387441496946958	0.0196595801004418	1.4430901176065714e-4	0.3211158055536525	0.9969554715291679	0.9999999991432865	2.959464396212752e-6	0.011091964532482623	0.48864976287402384	0.9879558576282519
ENSG00000105568	PPP2R1A	29.6953150065576	0.0131997052260702	0.0114265984236322	4.0475258011873905e-7	9.724368161045938e-4	0.10476724059203713	0.7266400751656158	2.0908154541032786e-7	3.9785754368970583e-4	0.05042857085361485	0.5334652190116992
ENSG00000105576	TNPO2	22.1025698455789	0.00985796552880325	0.00217197163420464	1.0990650645137379e-7	1.6063665539223226e-4	0.022353936364942095	0.34149888284490637	8.668117335020042e-10	6.508234995372675e-8	2.871518609559587e-6	7.479564438073183e-5
ENSG00000105583	WDR83OS	68.4422487361614	0.0299077893593164	0.0122471268916967	3.0746586144436705e-5	0.10833994500348565	0.9415289400556808	0.999995049656458	2.8608261182228034e-7	6.110961748011512e-4	0.07231641145863532	0.628734643211921
ENSG00000105607	GCDH	1103.96954705206	0.332123845127023	4.03413978990178e-5	0.9939528248404201	1	1	1	1.6856183115976364e-11	2.839750656846718e-11	5.3258508714293384e-11	1.0221867796644801e-10
ENSG00000105609	LILRB5	510.231735861169	0.186882208260696	0.0855294934469445	0.5637239208232168	0.9999999999998901	1	1	0.018121135816206446	0.9959856374793685	0.999999999999979	1
ENSG00000105612	DNASE2	1330.90055638562	0.374806485073835	0.134048380885474	0.9990344875123559	1	1	1	0.18163818728189207	0.9999998265809018	1	1
ENSG00000105619	TFPT	247.130164824113	0.100169082421207	0.0748408413082853	0.043811019323074074	0.9997132208984475	1	1	0.008261981832929255	0.9788728256866154	0.9999999999777258	1
ENSG00000105641	SLC5A5	37.7626655099874	0.0167257019911158	0.0146388038210693	1.2826876457650016e-6	0.004192186206284365	0.28895502638316173	0.9386050690375349	6.630642772620376e-7	0.0018466716471357003	0.16853279359743012	0.8412200568918844
ENSG00000105643	ARRDC2	43.8112705073876	0.0193528811690951	0.0185475366703536	2.7236615398607e-6	0.010105034367742682	0.4674126462523728	0.9855076169329858	2.180022407483051e-6	0.00784082007300868	0.41146959735346933	0.9768127039437815
ENSG00000105649	RAB3A	24.3590591728355	0.0108534590636371	0.00211777213604393	1.6647140155257034e-7	2.896677961911065e-4	0.038227258856663004	0.4633977639550215	8.182804434042623e-10	5.877586706226623e-8	2.5137611335823706e-6	6.429749011949148e-5
ENSG00000105656	ELL	194.19014245722	0.0804369709916754	0.00984202776491173	0.01267422750951852	0.9908716033053967	0.9999999999993809	1	1.0915484904838735e-7	1.5905952281702884e-4	0.02214900360965899	0.3395960046241743
ENSG00000105662	CRTC1	28.0855901315215	0.0124931142545504	0.0157433841849972	3.134258059755979e-7	6.912705048299772e-4	0.07995470652118031	0.6555174714435207	9.473672494264562e-7	0.002892713240085887	0.22869935652170892	0.9017415869916392
ENSG00000105669	COPE	52.0083144639628	0.0228908997088037	6.56494319744788e-4	6.732014817156795e-6	0.026717088184503024	0.6952015986945346	0.9985811452563258	1.0451606247130485e-10	1.3647221130952403e-9	1.5211095605316416e-8	1.4430883576999065e-7
ENSG00000105671	DDX49	41.6737197675686	0.0184260529727742	0.0105980646324243	2.10675940792715e-6	0.007537611789018461	0.4030570380995142	0.97515997750857	1.5001554343196943e-7	2.5021028901184295e-4	0.033544908439296695	0.43184229986768985
ENSG00000105676	ARMC6	76.5452378015504	0.0333306030909394	1.52639792660303e-4	5.8278499484254453e-5	0.177444879974902	0.9793329686216431	0.9999997933957394	2.7486124487552388e-11	9.51535517046409e-11	3.353227695512828e-10	1.1422800483273932e-9
ENSG00000105677	TMEM147	104.024089846619	0.0447603320039097	0.0412536704949081	3.496619359539821e-4	0.5047633381561815	0.9997417885165976	0.9999999999989141	2.1171866691938046e-4	0.3967608754838039	0.9988674025177353	0.9999999999432274
ENSG00000105698	USF2	57.4685908599051	0.0252335382760237	0.02434411032303	1.1586703801858e-5	0.0456396874892383	0.8102668875200947	0.9997527606524088	9.472711858249383e-6	0.03758076121323406	0.7706796887191922	0.9995112649182254
ENSG00000105699	LSR	254.239604124039	0.102754641749439	0.0939128910651773	0.05020833742035935	0.9998269751118424	1	1	0.03078064365628641	0.9990709445122752	0.9999999999999999	1
ENSG00000105717	PBX4	34.5542099468207	0.0153264045700794	0.0124871656206421	8.297122131573076e-7	0.0024519458847084286	0.2049423372442275	0.8814910091741324	3.127391282609082e-7	6.892320896427773e-4	0.07976396684162945	0.6548812450888387
ENSG00000105726	ATP13A1	10.6089871146809	0.00475609449077121	3.51769730543462e-6	7.357005893382507e-9	2.4892494195905e-6	2.6555648110471175e-4	0.009126232930687705	1.3793077791035557e-11	1.4650503032953566e-11	1.611588640315631e-11	1.8244961097479973e-11
ENSG00000105732	ZNF574	41.1016853064546	0.0181777252980482	4.42234684230756e-4	1.9635806605133865e-6	0.0069469559986008456	0.38592078639333904	0.971454568160842	6.51821929764651e-11	5.528252300379677e-10	4.24413271193913e-9	2.9226511877311623e-8
ENSG00000105750	ZNF85	88.1705658486915	0.0381993285735675	0.0311827701524763	1.3240207146614225e-4	0.30521757885198597	0.9962567894062764	0.9999999984766799	3.927829276118011e-5	0.13180381193724178	0.9596433571215468	0.9999984396321788
ENSG00000105755	ETHE1	96.5830227779235	0.041692018731151	0.00798193581068023	2.2589217368906844e-4	0.41023942765033083	0.9990528449428165	0.9999999999650236	4.641342621347633e-8	4.515044038289062e-5	0.0064587380943165185	0.14678232889902565
ENSG00000105767	CADM4	68.7537872503911	0.0300398354918678	0	3.154865848253863e-5	0.11064152579795028	0.9436784828430952	0.9999956003434152	1.3510859098175843e-11	1.3510859098175843e-11	1.3510859098175843e-11	1.3510859098175843e-11
ENSG00000105771	SMG9	85.1928512626963	0.0369569301830998	0.0186680037197198	1.0835175422385657e-4	0.2699534816924394	0.9940709814870384	0.9999999944467828	2.254831596215645e-6	0.008151018507668306	0.41982566383595654	0.9783545792882943
ENSG00000105778	AVL9	39.5562696516376	0.0175062113667725	0.0139723148748114	1.6176197926709435e-6	0.005533446315767021	0.3402184979978051	0.9589069089353216	5.298353760174734e-7	0.0013838010009736834	0.13682547129478384	0.7933650079752871
ENSG00000105793	GTPBP10	705.098632411392	0.24105123314427301	0.238792273853302	0.8672668414166291	1	1	1	0.8590382013961849	1	1	1
ENSG00000105808	RASA4	132.95531808081	0.0565056705748477	0.0456554314970419	0.0014811321850313197	0.8052270018219863	0.9999991058999403	1	3.951250632600045e-4	0.5319295415313292	0.9998259494515666	0.9999999999996158
ENSG00000105821	DNAJC2	43.5988711669097	0.0192608645119327	0.0112452645489495	2.6561570309890925e-6	0.009822877405093688	0.4610247441018158	0.984690146728693	1.94696985200693e-7	3.6043810390529174e-4	0.046305742586069454	0.5114934996146534
ENSG00000105835	NAMPT	63.7303638850994	0.0279062558754444	0.0275702891045781	2.0569097428757566e-5	0.07709046884547721	0.899647448825805	0.9999718187033112	1.9184039877995218e-5	0.07250674688175929	0.8906923447999	0.9999626096734867
ENSG00000105849	TWISTNB	10.0363517011244	0.00450053277986632	0.00450053277986632	6.176336886376532e-9	1.8674754610481514e-6	1.892569623967999e-4	0.0065521356458720925	6.176336886376532e-9	1.8674754610481514e-6	1.892569623967999e-4	0.0065521356458720925
ENSG00000105851	PIK3CG	67.8702540143051	0.0296652547910965	0.0260742542303853	2.9319087495482954e-5	0.10419016851353369	0.9374009253373126	0.9999938585656862	1.3947511284251313e-5	0.054323766762171766	0.8430340191178372	0.9998726682755509
ENSG00000105854	PON2	498.077773032623	0.183246328701223	0.182493028080341	0.536630723547818	0.9999999999996798	1	1	0.5309593343537087	0.9999999999996011	1	1
ENSG00000105866	SP4	48.0111368915688	0.0211688276616537	0.0211682809717901	4.394644533833869e-6	0.01710041330089318	0.5902825691111299	0.9953755096219845	4.394031898224959e-6	0.017097858264706445	0.590247056827057	0.9953738429351712
ENSG00000105875	WDR91	57.236839718236	0.0251343376850156	0.0239060117239344	1.1332372002126334e-5	0.044684588039175965	0.8061039178224162	0.9997329533325133	8.560145263625252e-6	0.03401594335275826	0.7493129084502483	0.9993217814651928
ENSG00000105926	MPP6	41.104184236978	0.0181788103898666	0.0109269684819914	1.9641875528275676e-6	0.0069494537144996205	0.3859954536823329	0.9714717631169182	1.7148334363614737e-7	3.019603695876283e-4	0.03965873715036827	0.47246493901837316
ENSG00000105928	DFNA5	1321.89269695692	0.373216472111831	0.302978613292522	0.9989621982751473	1	1	1	0.9814638207101742	1	1	1
ENSG00000105939	ZC3HAV1	521.050147820641	0.190091432013719	0.0688447545383165	0.587188900650716	0.9999999999999576	1	1	0.004990810615217889	0.9520373475444859	0.9999999991258668	1
ENSG00000105948	TTC26	594.480313356219	0.211222054222618	0.0711989641124508	0.7267974344971926	0.9999999999999999	1	1	0.006119623450195122	0.9648827121622157	0.9999999997885118	1
ENSG00000105953	OGDH	28.7853091571917	0.0128003811835555	0.00673431155585284	3.5069585524460933e-7	8.036992843122315e-4	0.09021721565781682	0.6875592459143558	2.432094692306208e-8	1.679170608503977e-5	0.0022850011731915254	0.0643741449185461
ENSG00000105963	ADAP1	123.141009479115	0.0525538194163098	0.0279799202450599	9.447774719592017e-4	0.7208421613382023	0.9999932680143089	0.9999999999999999	2.0884054049541412e-5	0.07812058103284669	0.9015307100104942	0.9999735223718622
ENSG00000105967	TFEC	20.1689766341715	0.00900332825092292	0.00908015943086154	7.527295320386429e-8	9.268345946933376e-5	0.013232819588766098	0.24424923829428313	7.794951373263359e-8	9.755764268604139e-5	0.013908246024140758	0.25250855092293634
ENSG00000105968	H2AFV	74.0609076149525	0.0322837581901654	0.00733346540033706	4.8213546607334123e-5	0.15426434904199648	0.9711662190412631	0.9999994399694653	3.345402699306277e-8	2.746114023766122e-5	0.003858532262390413	0.09868253976166041
ENSG00000105982	RNF32	488.807732669415	0.18045124678809	0.152229244127692	0.5155017624404046	0.9999999999992777	1	1	0.30111375147798136	0.999999998231568	1	1
ENSG00000105983	LMBR1	185.624610926833	0.0771627501995485	0.0640896197436952	0.009913634995996734	0.9849595286056705	0.9999999999948725	1	0.003222486071894015	0.9136774302920553	0.9999999859713893	1
ENSG00000105991	HOXA1	536.690519435954	0.194686532874124	0.00881820723066982	0.6199113277257946	0.9999999999999893	1	1	6.914114114575654e-8	8.178883191922726e-5	0.01171036692453653	0.22482708432315301
ENSG00000105993	DNAJB6	1236.15634271686	0.357667946741416	0.350520870862231	0.9979294353923829	1	1	1	0.9971827426713727	1	1	1
ENSG00000106003	LFNG	266.836532183201	0.107299586735982	0.0327034445378061	0.06299875293780388	0.9999306660913347	1	1	5.205257984230993e-5	0.1633485834436892	0.974730935858982	0.9999996235265576
ENSG00000106009	BRAT1	266.183966898246	0.107065273705524	0.0561382075876385	0.06228966910980216	0.9999272607293754	1	1	0.0014224473492998602	0.7982138553801982	0.99999891647582	1
ENSG00000106012	IQCE	202.354796250353	0.0835363987817083	0.046684648822654	0.015808971727303667	0.9944281319617728	0.99999999999992	1	4.5350189003490193e-4	0.5626634024678532	0.9998903140698375	0.9999999999998853
ENSG00000106034	CPED1	571.581345783152	0.204751814467653	0.161523037967834	0.6872145118657894	0.9999999999999996	1	1	0.37009580410509824	0.9999999998523815	1	1
ENSG00000106049	HIBADH	187.949706419805	0.078053833898073	0.0777898952699712	0.010612717032813634	0.9868404175051505	0.9999999999971017	1	0.010401721836284405	0.9863067563222107	0.9999999999965669	1
ENSG00000106066	CPVL	821.84186863294	0.270179024461351	0.261328199489809	0.9433581593405952	1	1	1	0.9255521811373283	1	1	1
ENSG00000106069	CHN2	393.835989978223	0.150673566164151	0.135440964879288	0.2899672664138042	0.9999999973437347	1	1	0.18982188975492142	0.999999876277553	1	1
ENSG00000106070	GRB10	99.0996036918901	0.0427319307605971	0.0431213032008732	2.627874336685876e-4	0.4423367261103237	0.999384592563962	0.9999999999890461	2.7786308793964487e-4	0.4543663904487679	0.9994776441586355	0.9999999999929378
ENSG00000106077	ABHD11	1708.21886493595	0.434858373137975	0.415454626365716	0.9999481906727584	1	1	1	0.9998611573429785	1	1	1
ENSG00000106086	PLEKHA8	16.9586832007947	0.00758113385291902	2.37350081691349e-4	3.798782488573238e-8	3.3339533960785595e-05	0.004725781809938101	0.11570518481349745	3.6887159993170826e-11	1.778970304400218e-10	8.345008017940359e-10	3.6958652804841563e-9
ENSG00000106089	STX1A	75.4459448404298	0.0328676634751573	0.0222532378610057	5.362474822312446e-5	0.16697987218447063	0.9760161464868852	0.9999996780215169	5.765151700254378e-6	0.022774475836253916	0.65811375958109	0.9977789265412036
ENSG00000106100	NOD1	35.6987880486993	0.0158260439017129	0.0153035179625045	9.723197549327267e-7	0.002987378394726181	0.2335478840524816	0.9054077819525179	8.236360360402983e-7	0.002429455782607004	0.2036735878966508	0.8802917093633913
ENSG00000106123	EPHB6	560.358871969767	0.201541922382407	0.170835304718674	0.6664667814264578	0.9999999999999987	1	1	0.4416228073877443	0.9999999999887579	1	1
ENSG00000106144	CASP2	81.8368193290273	0.0355528326951006	0.0306622658278421	8.57715937984116e-5	0.23208943248117642	0.9902202080639788	0.9999999768154905	3.557695563616292e-5	0.12189118438363544	0.9529332149263925	0.9999974894697636
ENSG00000106153	CHCHD2	2548.85216749105	0.534479174017263	0.363948407601283	0.9999998076803494	1	1	1	0.9984282242724664	1	1	1
ENSG00000106211	HSPB1	65.9956126889363	0.0288695272740738	0.0218212548901299	2.5029018259958846e-5	0.09128071076195854	0.9221128502076196	0.9999876564403758	5.180502215873517e-6	0.02036505584234849	0.6317568271191778	0.9970121706525998
ENSG00000106244	PDAP1	21.3183696962351	0.00951153124182191	2.05784779309616e-5	9.452136906507036e-8	1.292093656491966e-4	0.018212068096904788	0.3007912562973163	1.518740688766229e-11	2.059630244133359e-11	3.095323997115429e-11	4.855549295967876e-11
ENSG00000106245	BUD31	26.6061862519274	0.01184283494577	1.16518110597405e-4	2.4556869704372986e-7	4.963817736760578e-4	0.06085492132366288	0.582793256789468	2.38474795466459e-11	6.903388971579716e-11	2.087741091116868e-10	6.178204614570859e-10
ENSG00000106246	PTCD1	114.129439583079	0.048895934238962	0.0350808660156125	6.039748273098944e-4	0.6261665515630997	0.9999604758817981	0.9999999999999919	7.915100366850947e-5	0.2199077071298411	0.9884832473657255	0.9999999628182166
ENSG00000106263	EIF3B	64.0870856289406	0.0280580745069507	0.0161528918461926	2.1222746689364413e-5	0.07922338627257619	0.9034978031241307	0.9999752209202157	1.0766072423562534e-6	0.0033869447113412665	0.253141146682228	0.9188413256215846
ENSG00000106266	SNX8	26.535624662737	0.011811797850622	0.00340834497777463	2.426723727522173e-7	4.883851021734165e-4	0.0600301085552134	0.5791788052931709	2.7148917558506014e-9	4.7139772807458513e-7	3.5664502747057014e-5	0.0011883663968821345
ENSG00000106290	TAF6	196.295224342991	0.0812380963904628	6.44177144597596e-5	0.01343337829540625	0.9919496789743449	0.9999999999996337	1	1.8968493442628187e-11	3.933131598188311e-11	8.917089289184332e-11	2.029340029352511e-10
ENSG00000106299	WASL	77.8948476789495	0.0338983516837723	0.0338983516837723	6.445630484253062e-5	0.19072876456167986	0.9828389965453803	0.9999998807843132	6.445630484253062e-5	0.19072876456167986	0.9828389965453803	0.9999998807843132
ENSG00000106305	AIMP2	49.9165432201186	0.0219904750988363	0.014273176858627	5.4031143953414684e-06	0.02128458395397681	0.6421935348256018	0.9973380361732991	5.868112071816256e-7	0.0015790592851142593	0.15068447735937485	0.8160753697354016
ENSG00000106327	TFR2	64.4114585222131	0.028196084502168	0.00877983175482901	2.183241089737109e-5	0.0811957639393529	0.9068945107892223	0.9999779664075819	6.792434925628754e-8	7.967357766713867e-5	0.01141270325836885	0.22088940182476935
ENSG00000106330	MOSPD3	293.426961527153	0.116743778919626	0.0087445861695581	0.0962847516527664	0.9999906322981336	1	1	6.682278164138467e-8	7.777238446604606e-5	0.011144583041765244	0.21730063521634724
ENSG00000106344	RBM28	302.56604113025	0.119943754176078	0.117710916573001	0.10969849688573663	0.999995383169797	1	1	0.10022353802887984	0.9999924243877085	1	1
ENSG00000106348	IMPDH1	37.1609514588302	0.0164635806918477	0.0101689744704647	1.1845229311857608e-6	0.0038062940721996785	0.2723487944091846	0.930125556018886	1.2547939753915216e-7	1.9420094981592584e-4	0.02664693753699854	0.3790798114597692
ENSG00000106351	AGFG2	15.9140514796456	0.0071174701322326	0.00158045205027527	2.987874847537597e-8	2.3086747777067984e-5	0.0032125004477789876	0.08520347317092503	4.3929326842828686e-10	1.9328637468341014e-8	5.771674307375463e-7	1.1726410733658987e-5
ENSG00000106367	AP1S1	88.0197593786375	0.0381364843264315	0.0405161004568744	1.3108434859365747e-4	0.3033994446325008	0.9961672454461619	0.9999999983726424	1.895802824474213e-4	0.37421105655602693	0.9984759736503853	0.9999999998726085
ENSG00000106392	C1GALT1	748.858579574958	0.252237875096822	0.246760345696219	0.902705166236976	1	1	1	0.8864259480797736	1	1	1
ENSG00000106399	RPA3	83.8483932534396	0.0363949266362232	0.0211583894327614	9.876830782440393e-5	0.25452174262185	0.9927378671571607	0.9999999901188185	4.382959899129624e-6	0.017051679420827748	0.5896043109243647	0.9953435904871106
ENSG00000106400	ZNHIT1	130.355629441338	0.0554620874426237	0.00716973969841696	0.001319527447592228	0.7848609654586641	0.9999984605131108	1	3.071314569336181e-8	2.4085982253563287e-5	0.0033600521308430054	0.08834906828129963
ENSG00000106404	CLDN15	548.582850537487	0.19814572297556	0.00342598682407916	0.6437671929418618	0.9999999999999962	1	1	2.7542893521470546e-9	4.830858283400019e-7	3.6762611635876574e-5	0.0012270298959421444
ENSG00000106415	GLCCI1	46.4605843112386	0.0204991803664469	0.0190892820861365	3.697262725199657e-6	0.014184486297354582	0.5459722790091968	0.9928618119820593	2.5341304170645174e-6	0.009313401215366834	0.4491019876845789	0.9830542580095096
ENSG00000106443	PHF14	137.751746957101	0.0584250428972781	0.0584250428972781	0.0018214229956868833	0.8390897287945717	0.9999996769212202	1	0.0018214229956868833	0.8390897287945717	0.9999996769212202	1
ENSG00000106459	NRF1	75.1472999078454	0.0327418200613367	0.0297136738598928	5.2416376670971765e-5	0.1641933256721878	0.9750366005172472	0.999999637016936	2.9599414270831126e-5	0.10501058808039831	0.9382439849589088	0.9999941166832274
ENSG00000106460	TMEM106B	47.3630220014729	0.0208890334462913	0.0207973993420175	4.090573295867372e-6	0.015830688010892935	0.5719582851584437	0.9944459716745812	3.995021293667911e-6	0.015431098201202142	0.5658951640139569	0.9941058826244561
ENSG00000106477	CEP41	42.8856493651857	0.0189517527663037	0.0115137321927309	2.4398438107642306e-6	0.00892034779155726	0.4395407512363718	0.9816316414300739	2.1630982038889357e-7	4.169782004075362e-4	0.05249891984527422	0.5439313056244037
ENSG00000106479	ZNF862	147.096876872402	0.0621423137809039	0.062678419345291	0.002665561255265292	0.8920231518565502	0.9999999578584192	1	0.0028103125960854403	0.8983742373929158	0.9999999688000092	1
ENSG00000106484	MEST	281.899781303811	0.112674289917762	0.0515698515695817	0.08080002579809653	0.9999774437107517	1	1	8.402429195593086e-4	0.6968355438572287	0.9999890575090831	0.9999999999999997
ENSG00000106524	ANKMY2	53.1873924461302	0.0233977157461253	0.0229401184128097	7.597393848035594e-6	0.030198161895252484	0.7230051092667937	0.9990148385738614	6.812140453060778e-6	0.02704133466739156	0.6979685492121896	0.9986300777321157
ENSG00000106546	AHR	54.0440973012035	0.0237656329379637	0.0224089714060505	8.28428123988978e-6	0.032927978560813975	0.742208666062522	0.9992475657755477	5.989457635191542e-6	0.023693953803730072	0.6673785965711556	0.9980069318548952
ENSG00000106554	CHCHD3	15.3655353985826	0.00687383569052068	0.00658944041366864	2.623500472420659e-8	1.8886290157116292e-5	0.002593004185708736	0.0715096996593334	2.245816721480054e-8	1.4832049710200579e-5	0.0019978108297107333	0.057495980390345536
ENSG00000106560	GIMAP2	108.25145493031	0.0464947438134641	0.0125491672259946	4.4221285589185477e-4	0.5570400602249732	0.9998804821272597	0.9999999999998564	3.199598550551741e-7	7.107287960622655e-4	0.08176676589665233	0.6614836241238331
ENSG00000106565	TMEM176B	13278.1697892221	0.856757279718031	0.19745462098664401	1	1	1	1	0.6390584518836611	0.9999999999999953	1	1
ENSG00000106588	PSMA2	269.533832163335	0.108266788215976	0.108960679295357	0.06598412039778434	0.9999431672573568	1	1	0.06818418711202634	0.9999507660561878	1	1
ENSG00000106603	COA1	694.011322274943	0.238163564077416	0.216407749025362	0.856680928149168	1	1	1	0.7562390943459473	1	1	1
ENSG00000106605	BLVRA	1222.15304295542	0.355054824031323	0.25018957765462	0.9976810325388935	1	1	1	0.8968500988144689	1	1	1
ENSG00000106608	URGCP	68.1130894936718	0.0297682355852194	0.0207521602256173	2.991806961882837e-5	0.10593989184486852	0.9391825809663785	0.9999943949208312	3.9485627402191525e-6	0.015236724485347852	0.5628912634222243	0.9939309978729451
ENSG00000106609	TMEM248	52.3298314021813	0.0230291530212805	0.00202841713854674	6.959178178833625e-6	0.02763533931851958	0.7029377919368482	0.9987145809079685	7.427758408340424e-10	4.9504123911248143e-8	2.0076367800436756e-6	4.974649907629747e-5
ENSG00000106615	RHEB	35.033091682550896	0.0155355111247665	0.0154952533312021	8.87036923025164e-7	0.0026654901207583404	0.21670644599317634	0.8920198848314096	8.757433666017889e-7	0.0026232303677614643	0.214417789230257	0.8900522036614009
ENSG00000106617	PRKAG2	78.6864656711933	0.0342310562342036	0.0328965484127771	6.833166755371156e-5	0.19873666863307526	0.9846363844890589	0.9999999138741896	5.390546209782521e-5	0.16762300890688397	0.9762361226178582	0.9999996867737102
ENSG00000106624	AEBP1	323.425401130004	0.127161347443613	0.102525677183087	0.1439502532800293	0.9999991107998056	1	1	0.049616694660371	0.999818976675591	1	1
ENSG00000106628	POLD2	182.488153014488	0.0759579824714281	0.0696175175662678	0.009026879854469816	0.9820323293136558	0.9999999999889774	1	0.005341015436101104	0.9566381345180196	0.999999999449617	1
ENSG00000106635	BCL7B	24.6894643695218	0.0109990556651258	0.00360860244630902	1.7652258244016394e-7	3.1444302892413845e-4	0.04109976540703486	0.48134193929812863	3.18944826105394e-9	6.19452967254297e-7	4.995365217907999e-5	0.0016927920061057256
ENSG00000106638	TBL2	368.806129913316	0.142461857476236	0.118670676012583	0.23372771369057144	0.999999978230807	1	1	0.10423098034377354	0.9999938716922476	1	1
ENSG00000106665	CLIP2	29.5052347434073	0.0131163218861204	0.0107748398032156	3.9291137576835666e-7	9.349464093455495e-4	0.10161522149720603	0.7187292468684842	1.6124966673025654e-7	2.7699432571270943e-4	0.03673816319115142	0.4536886138924401
ENSG00000106682	EIF4H	59.848581957516	0.0262511214258488	5.00053361064164e-4	1.4493816309468777e-5	0.05628806477782644	0.8493636389738494	0.9998895172043692	7.474154628539509e-11	7.200685603336865e-10	6.1761110670133235e-9	4.684702514801131e-8
ENSG00000106683	LIMK1	1431.22972700034	0.391985668942327	0.103527760784636	0.9995653149107483	1	1	1	0.052242781275715244	0.9998515551060148	1	1
ENSG00000106692	FKTN	22.8419994113159	0.0101843997113088	0.0105428594211791	1.262981598193491e-7	1.9601062140961467e-4	0.026874829546241763	0.3809624384344372	1.4664677161491113e-7	2.423119218455394e-4	0.03259078265525406	0.42502338598767087
ENSG00000106701	FSD1L	25.4596907791691	0.0113382978477492	0.0108736982992114	2.0196772410052688e-7	3.7924445318948674e-4	0.04838986385959154	0.5227958566857194	1.6783871914505255e-7	2.930090469701607e-4	0.03861758734259413	0.4658954736560673
ENSG00000106733	NMRK1	5139.50197456018	0.698349153560398	0.620569490490387	0.9999999999961087	1	1	1	0.999999999180152	1	1	1
ENSG00000106771	TMEM245	379.178147394271	0.145883862471837	0.0543017273684194	0.2565889544299117	0.9999999908569586	1	1	0.0011573832035467468	0.7605899645196317	0.9999972070793597	1
ENSG00000106772	PRUNE2	5545.87750224753	0.714134043531139	0.708031734254488	0.9999999999987428	1	1	1	0.9999999999980509	1	1	1
ENSG00000106780	MEGF9	48.1290912979398	0.0212197319291019	0.0143727875294812	4.452013369515839e-6	0.017339612287779804	0.5935840327801807	0.9955282870579355	6.067980995450029e-7	0.0016485465804522148	0.1554389559481173	0.8231906244407107
ENSG00000106785	TRIM14	727.250493025666	0.246755576000961	0.167013328559146	0.8864108947691509	1	1	1	0.41212808982739657	0.9999999999673226	1	1
ENSG00000106789	CORO2A	1353.66329365334	0.378788705711975	0.264009813386993	0.9991952114152026	1	1	1	0.9313794872916241	1	1	1
ENSG00000106799	TGFBR1	139.440418456425	0.0590989360721591	0.056715971782604	0.001955293221167831	0.8498941404407434	0.9999997752602733	1	0.0015156152751223395	0.8091635137940254	0.9999991993313214	1
ENSG00000106804	C5	478.264679597307	0.177248986436973	0.0333613311195231	0.4910491319144228	0.9999999999981811	1	1	5.8599313301432865e-5	0.17815128663649527	0.9795379348461108	0.999999799421475
ENSG00000106829	TLE4	22.8016903128538	0.0101666100981372	0.0101666100981372	1.253542977197597e-7	1.939248286517703e-4	0.026612134519362174	0.37879137337492597	1.253542977197597e-7	1.939248286517703e-4	0.026612134519362174	0.37879137337492597
ENSG00000106868	SUSD1	1458.88003002826	0.396555478330467	0.145192781689707	0.999650352612058	1	1	1	0.2519016379993434	0.999999989094695	1	1
ENSG00000106948	AKNA	100.840070711398	0.0434498145667092	0.0416019975958243	2.9114866853741095e-4	0.4645078840221242	0.9995455908940487	0.9999999999951321	2.2291726773182585e-4	0.40746781646920605	0.9990172771114889	0.999999999961356
ENSG00000106952	TNFSF8	123.518553982264	0.0527064544773385	0.0483232538627847	9.61930491706231e-4	0.7244627764149473	0.999993760526879	0.9999999999999999	5.61458681660354e-4	0.6101060463375766	0.9999483270019545	0.9999999999999838
ENSG00000106976	DNM1	345.385532669529	0.134632993080819	0.0756972449018279	0.18505149533253284	0.9999998494579245	1	1	0.008843520298128182	0.9813353165014083	0.9999999999870035	1
ENSG00000106991	ENG	313.426491205556	0.123716433965451	0.0893060184599711	0.12691578739001141	0.9999980312319466	1	1	0.02320363284739113	0.9978890791476785	0.9999999999999984	1
ENSG00000106992	AK1	498.444716805344	0.183356576546867	9.61115761724012e-4	0.5374592084093506	0.99999999999969	1	1	1.81370696239469e-10	3.830873174237581e-9	6.39421097181625e-8	8.435119341898556e-7
ENSG00000106993	CDC37L1	46.7677234408542	0.0206318993151459	0.00366328128901026	3.827321013338825e-6	0.014729227547166879	0.554873236004219	0.9934425943635585	3.3298670487624804e-9	6.662164236947987e-7	5.46203748569285e-5	0.001857874489862854
ENSG00000107020	PLGRKT	784.59659412344	0.261132091961363	0.242255801344602	0.9251104845891188	1	1	1	0.8715023413496075	1	1	1
ENSG00000107021	TBC1D13	31.4130221823999	0.0139525808338578	0.00209258956634431	5.262703437480809e-7	0.0013717314070782471	0.13594303641526384	0.7918110666978446	7.964426895767929e-10	5.60260332571616e-8	2.3610808812524198e-6	5.986783631350967e-5
ENSG00000107036	KIAA1432	11.1529414545299	0.00499873462159841	0.00476825397449477	8.642263682467899e-9	3.2372678213654638e-6	3.6081180303282334e-4	0.012256250694771764	7.4174558717388095e-9	2.5228173597957593e-6	2.697587620191788e-4	0.00926621028530894
ENSG00000107077	KDM4C	50.0089231889609	0.0220302760390506	0.0227943109408656	5.456656821833938e-6	0.021505367690196953	0.6446276617409143	0.9974097009216009	6.577135991392424e-6	0.02608923601288371	0.689730755684842	0.9984802969044266
ENSG00000107099	DOCK8	573.249324607561	0.205226694071823	0.18112101364304	0.6902231795650646	0.9999999999999996	1	1	0.5205852937299931	0.9999999999994053	1	1
ENSG00000107104	KANK1	1971.93406344961	0.470411517357426	0.468762867881488	0.9999922420420985	1	1	1	0.9999915064450341	1	1	1
ENSG00000107175	CREB3	50.9944658990182	0.0224546852336036	4.88126283077714e-5	6.056714009772257e-6	0.023969097842980958	0.6700733693546794	0.9980695741982839	1.7589374401438818e-11	3.205913312598341e-11	6.47186748636841e-11	1.326885268326805e-10
ENSG00000107185	RGP1	656.739505879041	0.228293004819135	8.05006098588104e-4	0.8157228052960068	1	1	1	1.3861423120431482e-10	2.321496661572553e-9	3.194964215413876e-8	3.609625225386992e-7
ENSG00000107201	DDX58	1724.12617422197	0.437137682229974	0.28167932951404	0.9999539666769306	1	1	1	0.9610084798511399	1	1	1
ENSG00000107242	PIP5K1B	211.838107624535	0.0871102837645152	0.037978414224958	0.020132671175205785	0.9969222026703451	0.9999999999999928	1	1.2781943739514912e-4	0.2988415049561771	0.9959331478527581	0.9999999980790261
ENSG00000107263	RAPGEF1	2264.82618006305	0.504997538172418	0.428432932445189	0.9999989008954195	1	1	1	0.9999278968974448	1	1	1
ENSG00000107281	NPDC1	837.958870736069	0.274025553042958	0.018738735035312402	0.9498952007659965	1	1	1	2.2997786024436806e-6	0.008337653206113127	0.424736800455775	0.9792167935868457
ENSG00000107290	SETX	45.263561103012	0.0199815870789764	0.0196457071795509	3.2257925973722124e-6	0.01220814113729618	0.5108086886109768	0.9901173003273732	2.9484302030979848e-6	0.01104574622179555	0.4876914701612587	0.9878537626790138
ENSG00000107317	PTGDS	356.416708040664	0.138338144962472	0.00486467029130215	0.20742002444172025	0.9999999391709664	1	1	7.911279742423005e-9	2.803102416626402e-6	3.05129750542088e-4	0.0104373237132247
ENSG00000107331	ABCA2	291.917487112083	0.11621300803463	1.45090351698759e-4	0.09416550204099594	0.9999894804672615	1	1	2.6707858147290153e-11	8.92855789302871e-11	3.0537206097136504e-10	1.011993711053094e-9
ENSG00000107341	UBE2R2	53.270261265187	0.0234333163869128	0.014272092216867	7.661634568445486e-6	0.030454722908675236	0.7248998693985692	0.9990400329147947	5.865967238616321e-7	0.0015783162776771276	0.15063315747851747	0.8159967923762309
ENSG00000107371	EXOSC3	309.946957810309	0.122511247460528	0.0506242555102398	0.12125122587671522	0.9999974097118627	1	1	7.491170293414395e-4	0.6727139645486914	0.9999826622106217	0.999999999999999
ENSG00000107372	ZFAND5	48.9069410891107	0.0215552873515538	0.0159715691412023	4.8466202705599315e-6	0.01898136041261478	0.6150770886772375	0.9964239926560291	1.0176250714311053e-6	0.00316021303432501	0.24219012239475257	0.9115948309943658
ENSG00000107443	CCNJ	60.6295756748636	0.0265845783644732	0.0252178588666148	1.557417387632043e-5	0.06012459564207773	0.8607772871076961	0.9999156401294853	1.1546179866983586e-5	0.045487767337334506	0.8096131002615821	0.9997497262453725
ENSG00000107521	HPS1	815.183303769304	0.268577948078771	0.237605425303055	0.9404323663255247	1	1	1	0.8545635389814865	1	1	1
ENSG00000107537	PHYH	55.4840039019568	0.0243833856035964	0.0219359563602272	9.55847775396812e-6	0.037913101503052715	0.7725352615042651	0.9995255361491661	5.330509405876427e-6	0.02098495727136862	0.6388464559328175	0.9972368617167428
ENSG00000107551	RASSF4	285.490880181149	0.113946086349557	0.110326678448668	0.08545113144655381	0.9999828161224564	1	1	0.07265895714022963	0.9999629644392186	1	1
ENSG00000107554	DNMBP	368.800094285461	0.142459858178912	0.12668368007592	0.23371461982700892	0.9999999782198552	1	1	0.14151431691800742	0.9999990062745505	1	1
ENSG00000107560	RAB11FIP2	12.3329578199286	0.00552469459214221	0.00562585246305199	1.2065908161495997e-8	5.549883189570615e-6	6.700880511509855e-4	0.02188942884317069	1.2837368168483465e-8	6.129117031017373e-6	7.498898297582102e-4	0.024265006847315584
ENSG00000107566	ERLIN1	49.511523978982	0.0218159385646902	6.21009656685715e-4	5.173638812472348e-6	0.020336666010881577	0.6314266800478324	0.997001354139775	9.723677418804755e-11	1.1902344665415399e-9	1.255241599551482e-8	1.1365803120888529e-7
ENSG00000107611	CUBN	1489.10443377669	0.401472770681858	0.389356758600151	0.9997240562501569	1	1	1	0.9995078215426475	1	1	1
ENSG00000107614	TRDMT1	33.777139307403	0.0149869029720405	0.0124141513415895	7.434192900168668e-7	0.0021353800401251455	0.18651589500108423	0.8627205098867275	3.0441502185674096e-7	6.646219442386636e-4	0.07744721495740525	0.6470249132028669
ENSG00000107643	MAPK8	374.928518015365	0.144485104469126	0.145383242864133	0.24713791480411784	0.9999999869448322	1	1	0.25319000895596044	0.9999999896112177	1	1
ENSG00000107669	ATE1	30.0891489066444	0.0133724252309137	0.0135588946323422	4.302563293423489e-7	0.0010541148989690052	0.111487691379074	0.7425948009622231	4.5932460301933986e-7	0.0011486661450418323	0.11903257722317029	0.7591549916041731
ENSG00000107679	PLEKHA1	142.134916653486	0.060172226256599	0.0589103988819216	0.002185271295249147	0.8659722120648291	0.9999998746580079	1	0.0019170445101589495	0.8469271626076658	0.9999997511689113	1
ENSG00000107719	PALD1	241.246184903906	0.0980179010062437	0.0965346888249682	0.03895116821007172	0.9995670818392804	1	1	0.03583605026241976	0.9994275783508345	1	1
ENSG00000107736	CDH23	514.579541518298	0.18817501327191	0.187474455040712	0.5732316450524432	0.9999999999999251	1	1	0.568088343291123	0.9999999999999077	1	1
ENSG00000107742	SPOCK2	30.9880933452541	0.0137664403631749	0.00298776352490222	4.936432247415468e-7	0.0012621414247743212	0.1277823232094093	0.7767632771679589	1.899792767545705e-9	2.558996906598665e-7	1.6623524378700516e-5	5.251363326618241e-4
ENSG00000107745	MICU1	137.1357871972	0.058178993311312	0.00249233543697618	0.0017744803311692259	0.8350059625695035	0.9999996314030306	1	1.1999335969292702e-9	1.1528290810858266e-7	6.021814054513186e-6	1.7203564869905374e-4
ENSG00000107771	CCSER2	1511.41286406806	0.405051094351507	0.367406702278502	0.9997680936166886	1	1	1	0.9986522028332186	1	1	1
ENSG00000107779	BMPR1A	26.8895219671571	0.0119674428601257	0.012062517376954	2.5749613219439027e-7	5.296112918641294e-4	0.0642447454423104	0.5971859815636408	2.6692633103841956e-7	5.562122639768408e-4	0.06691622523692986	0.6080327270788657
ENSG00000107796	ACTA2	3737.43082583484	0.627356143125858	0.207936116413254	0.9999999994781915	1	1	1	0.7070796801237942	0.9999999999999998	1	1
ENSG00000107798	LIPA	3565.59114208242	0.61628812934041	0.604813919766131	0.9999999989114472	1	1	1	0.9999999976867956	1	1	1
ENSG00000107816	LZTS2	92.4369918168162	0.0399738423766483	0.0110547591689897	1.7459309584555438e-4	0.35777393168029115	0.9981104701682723	0.9999999997704944	1.8050243644207598e-7	3.2438655899935664e-4	0.04223883425584074	0.48818871570957334
ENSG00000107819	SFXN3	756.757318883531	0.254222040232478	0.252085064436628	0.9081205582249273	1	1	1	0.9022777259873616	1	1	1
ENSG00000107833	NPM3	61.4463920453182	0.0269330860718719	0.00819780764310236	1.6776878782986948e-5	0.06432285392867498	0.8719946440160791	0.9999365562108643	5.156740623402101e-8	5.2888003016837715e-5	0.007584440581625773	0.16528442558119105
ENSG00000107854	TNKS2	83.7340482127929	0.0363470984325438	0.033127657322689	9.798739806043955e-5	0.2532248885356858	0.9926125639738627	0.9999999896248474	5.619732708062042e-5	0.17281601136550173	0.9779327457871816	0.9999997489053909
ENSG00000107863	ARHGAP21	89.7509319825425	0.0388574069782953	0.0394638704039294	1.468959284902649e-4	0.32444974873491295	0.9970845362614351	0.9999999992403682	1.614335325649252e-4	0.3424552458961523	0.9976930265641867	0.9999999996024992
ENSG00000107864	CPEB3	29.9914550631809	0.0133295862060679	0.0132521037391145	4.23805746829764e-7	0.0010333396916594184	0.10979677957276612	0.7386924030632767	4.1234901326792084e-7	9.966346060389375e-4	0.10677876714029622	0.7315421945118801
ENSG00000107882	SUFU	55.9453199222724	0.0245811353342105	0.00167785570508341	1.000057046085523e-5	0.03961890156574066	0.781727334130334	0.999591567803844	4.955820198659922e-10	2.4018363742328575e-8	7.714405254599654e-7	1.6467993587565566e-5
ENSG00000107890	ANKRD26	115.336691925916	0.0493876075020257	0.040671342127297	6.426142071774832e-4	0.6397129879145771	0.9999686633263388	0.9999999999999956	1.9406789800335833e-4	0.37894086397619653	0.9985676736826357	0.999999999892459
ENSG00000107897	ACBD5	10.7851767662011	0.00483469985300669	0.00387707037541497	7.754987874086794e-9	2.7132360679305023e-6	2.9373582566816214e-4	0.010061444673637232	3.927125846736601e-9	8.793845578392023e-7	7.664886229052925e-5	0.00263684561113553
ENSG00000107902	LHPP	1093.7939613605	0.330073014229115	0.318885359034033	0.9934327594375811	1	1	1	0.9897987962290193	1	1	1
ENSG00000107929	LARP4B	41.2403290912195	0.0182379239219538	0.0133058967080008	1.9974951507295557e-6	0.007086614913555556	0.39006621545042575	0.9723948592670645	4.202743714154522e-7	0.0010219992565112523	0.10886853976197397	0.7365188399451305
ENSG00000107937	GTPBP4	167.79882216166	0.0702734336763566	0.0562976899731138	0.005653608088507234	0.9602406404601509	0.9999999996292629	1	0.0014476745588533069	0.8012787081913895	0.9999990030651333	1
ENSG00000107951	MTPAP	133.950248596804	0.0569044518577453	0.056673901802127	0.0015470856260646482	0.8126439402330258	0.9999992749186688	1	0.0015086641215522612	0.8083805170695733	0.9999991814376692	1
ENSG00000107954	NEURL1	19.8553643401179	0.0088645743186045	0.0068829710330118	7.063584583910654e-8	8.440872296855417e-5	0.01207810578148083	0.2296261424362871	2.6364587180083277e-8	1.903096120425829e-5	0.002614307335332411	0.07199467080563171
ENSG00000107957	SH3PXD2A	175.047320780222	0.0730872076144191	0.0307050241284886	0.007166193454273273	0.9729119518697211	0.9999999999336164	1	3.5869238694141714e-5	0.12268819336749004	0.9535183115419469	0.9999975851307306
ENSG00000107959	PITRM1	1579.60179049793	0.415728246693696	0.413773373032305	0.9998630384263794	1	1	1	0.9998490435340535	1	1	1
ENSG00000107960	OBFC1	112.523159535335	0.0482409613277969	0.0330661889397671	5.555622265631666e-4	0.6077743693608243	0.9999463092449961	0.999999999999982	5.5579728155841224e-5	0.17142664942171726	0.9774923266492354	0.9999997336693667
ENSG00000107968	MAP3K8	78.5347536189729	0.0341673118038882	0.03427162452912	6.757405048840592e-5	0.19718986292088336	0.9843057236782176	0.9999999083235317	6.88176208627489e-5	0.19972415253682818	0.9848435464321526	0.9999999172337763
ENSG00000108010	GLRX3	21.910057593604	0.00977294228169064	0.0104012410753936	1.0594685639908619e-7	1.5237518189015198e-4	0.02127709811742229	0.33137815327225517	1.3829769218709487e-7	2.2301477279496051e-4	0.03023464945059362	0.4075591299939204
ENSG00000108021	FAM208B	14.1954497555819	0.00635371885531985	0.00507814285916588	1.9681544949357033e-8	1.2064373382969507e-5	0.0015946697307654967	0.047423028182981386	9.100670328443528e-9	3.5208561655064585e-6	3.97690444144283e-4	0.013445196562790751
ENSG00000108039	XPNPEP1	367.746012785388	0.142110551409779	0.0948253437273549	0.23143181384259615	0.9999999762210081	1	1	0.03247618624454751	0.9992139584268068	1	1
ENSG00000108064	TFAM	794.908219951276	0.263659176982881	0.0425040329112504	0.9306397248457806	1	1	1	2.542911310794427e-4	0.43529519328322286	0.9993230414092044	0.9999999999858525
ENSG00000108091	CCDC6	38.7896969265327	0.0171727792894189	0.0172788630771809	1.466321804755033e-6	0.0049234520864318565	0.31802193256578526	0.951074574977181	1.513075967629618e-6	0.005111305639097896	0.3250405002631628	0.9536943484164908
ENSG00000108094	CUL2	41.0190414487009	0.0181418381255289	0.00433521181663231	1.9435998339645266e-6	0.006864753495667952	0.38345250109176887	0.9708807265549099	5.498255295499632e-9	1.5409842263336415e-6	1.5060625463980681e-4	0.005223723829782312
ENSG00000108100	CCNY	42.272435325292	0.0186858287557279	0.00924493048572144	2.266086682745083e-6	0.0081977357494748	0.4210630244730643	0.9785748124981704	8.396214101757948e-8	1.0875664396814422e-4	0.015447055213708816	0.2705865933487679
ENSG00000108107	RPL28	324.464860267399	0.127517917552731	0.112074336185561	0.14578401605997915	0.9999991817506994	1	1	0.07866487520329102	0.9999743762735098	1	1
ENSG00000108175	ZMIZ1	31.0958968818431	0.0138136704548732	0.0130217763413943	5.017528679207572e-7	0.0012892306059791858	0.1298250188449751	0.7806482000339487	3.798452250514117e-7	8.939115304646972e-4	0.09811400465869757	0.7095979243928008
ENSG00000108179	PPIF	142.346019252021	0.0602562106024975	0.0455301316341013	0.0022041715538068107	0.8671728681701106	0.9999998802917637	1	3.884743340624164e-4	0.5281482993996679	0.9998159950178888	0.9999999999995554
ENSG00000108187	PBLD	97.7288399158458	0.0421657780810089	0.00824500573806497	2.4211231296489277e-4	0.42484867724640707	0.9992208231020401	0.999999999979348	5.275617476208083e-8	5.4723810936629924e-5	0.007850271746472237	0.16948900419180457
ENSG00000108219	TSPAN14	285.688398181528	0.114015932064363	0.0673475171286157	0.08571150168772956	0.9999830721079127	1	1	0.004365193144028501	0.9419319278860101	0.9999999978771198	1
ENSG00000108239	TBC1D12	138.545799103795	0.0587420431506735	0.00725331633681988	0.0018834160121594667	0.8442412363020408	0.9999997275330158	1	3.208777443752808e-8	2.5761212286035118e-5	0.0036074721707004542	0.09353275276273842
ENSG00000108244	KRT23	1498.1596805844	0.402930430451261	0.383512104407049	0.9997428823608406	1	1	1	0.9993530192930309	1	1	1
ENSG00000108256	NUFIP2	17.2163242739299	0.00769542224734003	0.0021715867044658	4.024742827901662e-8	3.639847742931135e-5	0.0051760604256598786	0.12412498382559267	8.664595707585931e-10	6.50356263287577e-8	2.8688306951130116e-6	7.471619309362687e-5
ENSG00000108262	GIT1	822.02868599398	0.270223844297965	0.0630920707002236	0.9434382876192388	1	1	1	0.002926363165654755	0.9030687579902508	0.9999999752873342	1
ENSG00000108264	TADA2A	699.785775495439	0.239670246142184	0.0436683489892532	0.8622809788854923	1	1	1	3.002826241678136e-4	0.4712469029251295	0.9995860376837251	0.9999999999962028
ENSG00000108272	DHRS11	262.197003507881	0.105631020880832	0.00209580008338032	0.058068396314780335	0.9999026323699102	1	1	7.992020378821962e-10	5.6370456524845736e-8	2.3800896491454893e-6	6.041755448205066e-5
ENSG00000108278	ZNHIT3	227.121941923071	0.0928118611631535	0.001343922329749	0.02882291492692013	0.9988655832503461	0.9999999999999999	1	3.219270405807606e-10	1.0999404609357555e-8	2.7024574122958e-7	4.782922341184381e-6
ENSG00000108292	MLLT6	33.9683453647582	0.0150704624732701	0.00555230360753733	7.639075196852474e-7	0.0022099683856748875	0.19097158407121062	0.8675377737637793	1.2272564853255119e-8	5.7030745649333525e-6	6.91122596654048e-4	0.022519513447250894
ENSG00000108294	PSMB3	240.606315650714	0.0977833447473229	0.0388487228095137	0.038445933218326345	0.9995474150772954	1	1	1.466961789312604e-4	0.3241937780248604	0.9970748236265763	0.9999999992333248
ENSG00000108296	CWC25	63.6203953838435	0.0278594443772034	0.00208748068899628	2.0371088255366487e-5	0.07644056397508658	0.8984358631586968	0.9999706815189353	7.920665234806279e-10	5.548161174928623e-8	2.3311023162886357e-6	5.900193676666721e-5
ENSG00000108309	RUNDC3A	235.537418224758	0.0959209240619272	0.00375440883553435	0.03460169760268539	0.9993581588005463	1	1	3.574830542696361e-9	7.508990528259929e-7	6.323211945458151e-5	0.0021625670674857433
ENSG00000108312	UBTF	25.7527465571198	0.0114673116159383	0.00604179515039817	2.1243286918437576e-7	4.066970067476694e-4	0.051388655351817025	0.5383635938202735	1.6450975359738607e-8	9.094534767495333e-6	0.0011672574737668917	0.03610982818662212
ENSG00000108344	PSMD3	81.0667603195094	0.0352300775090302	0.0201770777401122	8.119493196279137e-5	0.22372727126823522	0.9890605093202951	0.9999999679615752	3.397367701607479e-6	0.012927496937487182	0.5241655588232494	0.9912506902461871
ENSG00000108349	CASC3	84.5884853830451	0.0367043773409228	0.00588752314379361	1.039509526453708e-4	0.2629754792328687	0.9935025607922674	0.9999999928003898	1.5023740806974217e-8	7.875659425060633e-6	9.942217658696073e-4	0.03130761620245104
ENSG00000108352	RAPGEFL1	617.154800277475	0.217525952484904	0.155280812219306	0.7623128866973465	1	1	1	0.32335353215045104	0.9999999992097377	1	1
ENSG00000108370	RGS9	56.5029860410059	0.0248200799153215	0.0235266403489671	1.0558220122192097e-5	0.04175325079025349	0.7924982311896577	0.9996597037328964	7.8322672608655e-6	0.031134930029529384	0.7298298356764941	0.9991032173039923
ENSG00000108375	RNF43	93.8508067334495	0.0405604399645551	0.0077326719201713	1.9085288634879127e-4	0.37556096403355466	0.9985027130982767	0.9999999998786203	4.100782768912126e-8	3.7446317261213835e-5	0.00533009447657018	0.12694588216759928
ENSG00000108384	RAD51C	1529.71272285789	0.407954645040647	0.0247795505343876	0.9997988042025038	1	1	1	1.046178469377157e-5	0.041385527853612714	0.7906972085316211	0.9996489659584947
ENSG00000108387	SEPT4	63.2848302842022	0.0277165728273704	1.34789861409328e-6	1.9776884125355387e-5	0.074479546644587	0.8946660318791405	0.9999669298319427	1.3618772776169408e-11	1.3944179144687041e-11	1.4491630118129706e-11	1.526945236918209e-11
ENSG00000108389	MTMR4	19.7714420786168	0.00882743734792328	2.57858281030974e-6	6.943653640956171e-8	8.230472510917242e-5	0.011782861841055148	0.22577882966160534	1.3717582625361047e-11	1.4343415344342247e-11	1.5406009801210985e-11	1.6934897928422288e-11
ENSG00000108395	TRIM37	1260.77832033438	0.362211610250798	0.0512862306185804	0.9983029554220322	1	1	1	8.119828132089335e-4	0.6897062420095633	0.9999874291388218	0.9999999999999996
ENSG00000108405	P2RX1	3853.87737510645	0.634500359013077	0.600130100533699	0.9999999996767367	1	1	1	0.9999999968613142	1	1	1
ENSG00000108423	TUBD1	10.2055715478147	0.00457606764058605	0.00356103247552001	6.507947958311888e-9	2.035457239091265e-6	2.0955632668973045e-4	0.007243130974446399	3.071165433077283e-9	5.810904761816005e-7	4.6176832319111405e-5	0.0015592615016497557
ENSG00000108424	KPNB1	10.6894487788433	0.00479199324885634	1.03746268302684e-4	7.536641533079091e-9	2.5894797652803447e-6	2.781262647367777e-4	0.009544391906965544	2.2611690297935638e-11	6.092948368063844e-11	1.7331636126272087e-10	4.848557111358787e-10
ENSG00000108433	GOSR2	208.508257340328	0.085858574583841	0.0764476297247998	0.018526609449565523	0.9962000770852163	0.9999999999999832	1	0.009379357505957198	0.9832785909421681	0.9999999999919172	1
ENSG00000108439	PNPO	63.1075722681058	0.0276410857879171	0.0148832397854885	1.946901431215675e-5	0.07345710058764843	0.8926299817018705	0.9999647644793423	7.186595782915361e-7	0.0020457512409987055	0.1810620878202045	0.8565611889353094
ENSG00000108443	RPS6KB1	47.292238235637	0.0208584660760092	1.5110700169734e-4	4.058482068969305e-6	0.01569651374237202	0.5699389866098521	0.994334590661007	2.7327251572728528e-11	9.394407474161426e-11	3.2908087366223526e-10	1.1148444389874612e-9
ENSG00000108448	TRIM16L	575.96353851214	0.205998229439943	0.116768731441312	0.6950771651969178	0.9999999999999997	1	1	0.09638512019689882	0.9999906833216973	1	1
ENSG00000108465	CDK5RAP3	114.815612806346	0.0491754518757662	0.0350382285231936	6.256933150371458e-4	0.6338960792084458	0.999965354237096	0.9999999999999942	7.857512456921345e-5	0.2188217321425201	0.9883132888621045	0.9999999612051843
ENSG00000108468	CBX1	113.578403207711	0.0486713465686805	0.020602691313482	5.869885252064444e-4	0.6199033043497092	0.9999560820144591	0.9999999999999893	3.7983646735684218e-6	0.014607973582624556	0.552918953190559	0.993318640441712
ENSG00000108469	RECQL5	248.068579498643	0.100511218188692	0.0605399786541695	0.04462219228105291	0.9997315969890467	1	1	0.0022690341398701186	0.871169026504017	0.9999998975523137	1
ENSG00000108474	PIGL	170.588852095173	0.0713585073174189	0.00979768724629298	0.0062029901688256395	0.9656334015006829	0.9999999998081021	1	1.0708656827951302e-7	1.5474121598224588e-4	0.02158634576192875	0.33431577418535996
ENSG00000108479	GALK1	113.681224750669	0.048713261924972	9.81829304947878e-4	5.901277441379138e-4	0.621075731179787	0.9999569363199193	0.9999999999999899	1.8762214004652833e-10	4.079240389920358e-9	6.972644228664393e-8	9.372306261079544e-7
ENSG00000108509	CAMTA2	220.12249271006	0.0902096076601413	0.00794218958307779	0.024565304855611036	0.9981973350546874	0.9999999999999991	1	4.551342835945604e-8	4.383760739790077e-5	0.006266929051525705	0.1435083328999942
ENSG00000108515	ENO3	10.7254965613448	0.00480807547942501	0.00694506007249449	7.618268349496304e-9	2.635498988157181e-6	2.839194628778685e-4	0.009736572587181302	2.7259538959434337e-8	2.003980422538021e-5	0.002762945455508925	0.07534924189778902
ENSG00000108518	PFN1	225.353936989642	0.0921559589312723	0.0372165593204309	0.027701558159876183	0.9987236094989033	0.9999999999999998	1	1.1304132349632123e-4	0.27719772597886483	0.9946072570781352	0.9999999957526983
ENSG00000108523	RNF167	273.350044352254	0.109631635947558	0.0479178588624561	0.07035820757803068	0.9999571761176914	1	1	5.329143191374897e-4	0.5985641373288477	0.9999376273455081	0.9999999999999736
ENSG00000108528	SLC25A11	141.207392814771	0.0598030453591113	0.00157659923909707	0.0021037699736959903	0.8605962389589904	0.9999998466548411	1	4.371671913361297e-10	1.916009273461583e-8	5.704402235018335e-7	1.1566140289964721e-5
ENSG00000108556	CHRNE	646.094327385829	0.225426749291651	0.0508029414137994	0.8024042950466513	1	1	1	7.656682764151101e-4	0.6773485121353124	0.9999840983677368	0.9999999999999992
ENSG00000108557	RAI1	143.32184806798	0.0606442360718436	0.0557127615043939	0.0022932572852866207	0.872613860009521	0.9999999032604159	1	0.0013569352859477135	0.7898794962303926	0.9999986480020782	1
ENSG00000108559	NUP88	85.6387127301841	0.0371431622210994	0.0148730168065531	1.1169828603230236e-4	0.2751426741341376	0.9944603794606478	0.9999999954177344	7.162566948437643e-7	0.002037083570389231	0.18052872414208154	0.8559426939676005
ENSG00000108578	BLMH	360.865031015558	0.139823286641828	0.0509216768061589	0.21672978999675185	0.9999999578906704	1	1	7.768357003881121e-4	0.6804087207534257	0.999984988219385	0.9999999999999993
ENSG00000108582	CPD	246.626172876498	0.0999852249961697	0.0552093828777184	0.04337949576383726	0.999702855724737	1	1	0.0012826913984160804	0.7797208176912076	0.9999982459248181	1
ENSG00000108587	GOSR1	17.2331624307167	0.00770289065981536	9.97727234901623e-4	4.039892897989006e-8	3.6606516714554616e-5	0.0052066515111808265	0.1246875496420834	1.9251655825058833e-10	4.278504661670013e-9	7.446034644420507e-8	1.0151092523225103e-6
ENSG00000108588	CCDC47	34.8242844441781	0.0154443451245525	0.00419024615707182	8.616392690452557e-7	0.0025705817900032457	0.21153977379526667	0.8875237250759007	4.954496257703056e-9	1.2964212009469733e-6	1.2247839055035126e-4	0.004246475433417718
ENSG00000108590	MED31	74.1581764549881	0.0323247878965259	0.0344346229209947	4.857778586853101e-5	0.15513991516575443	0.9715332175859379	0.999999461211743	7.080016911087395e-5	0.20371559760125613	0.9856507802728981	0.9999999294842183
ENSG00000108591	DRG2	167.093783758828	0.0699988349413379	0.00807382373777025	0.005520993481585967	0.9587651527365831	0.9999999995624536	1	4.855155633087804e-8	4.831572540087148e-5	0.006920249251987642	0.1545102652062258
ENSG00000108592	FTSJ3	743.919627226988	0.25099183540378	0.0324009199680012	0.8991758490959868	1	1	1	4.925991946758135e-5	0.1567717868745171	0.972203333253706	0.9999994985614786
ENSG00000108599	AKAP10	991.596105557558	0.308754922152768	0.0983762328926293	0.9850176276565853	1	1	1	0.03973227394779444	0.9995955633256279	1	1
ENSG00000108604	SMARCD2	404.075735052613	0.153987832612808	0.0114837890824573	0.31387314684735135	0.9999999988869557	1	1	2.1380218795385986e-7	4.103215399520188e-4	0.05178084878933642	0.5403420723800205
ENSG00000108622	ICAM2	65.5568998609091	0.0286831187028854	1.57911632888792e-7	2.4106235822385358e-5	0.08841240518919746	0.9181195672723589	0.9999854937840454	1.352351564065657e-11	1.3561374245796287e-11	1.3624656958199921e-11	1.3713363777867471e-11
ENSG00000108639	SYNGR2	105.005437131199	0.0451635232564291	0.0438870861940237	3.6955787639392224e-4	0.517042630115649	0.999783640878633	0.999999999999319	3.096678881846504e-4	0.47798409392704977	0.9996230736630717	0.9999999999970408
ENSG00000108651	UTP6	35.1296476169615	0.0155776620887777	0.0167023419525101	8.989955839755481e-7	0.002710335921906948	0.21911468011757262	0.894050240491705	1.273663990053464e-6	0.004156553952460951	0.28746115735111966	0.9378860987232874
ENSG00000108654	DDX5	944.007671173649	0.298358211888747	-3.53610751150606e-16	0.9780973615316827	1	1	1	NaN	NaN	NaN	NaN
ENSG00000108666	C17orf75	377.63510794726	0.14537650295529	0.084217749637322	0.25314437193051553	0.9999999895933567	1	1	0.01657216277716056	0.9950143978688641	0.9999999999999493	1
ENSG00000108671	PSMD11	70.8494646041	0.0309271585491734	5.14535759155113e-4	3.742120141148053e-5	0.12687863295355573	0.9564587923878214	0.9999980277207386	7.72534258786095e-11	7.672856794371796e-10	6.75726175014546e-9	5.244079614996622e-8
ENSG00000108679	LGALS3BP	81.506846747227	0.0354145575810137	0.028367541546409	8.378446413559448e-5	0.22849032573527617	0.9897378149087241	0.9999999733632285	2.261082015830862e-5	0.08369070186696781	0.9109798116225346	0.9999809693520563
ENSG00000108733	PEX12	181.569198561069	0.0756044001021742	1.41544019823202e-7	0.008778947295134953	0.9810813443876834	0.9999999999862195	1	1.3522183373027019e-11	1.3556156197580549e-11	1.3612888594138894e-11	1.3692380562702056e-11
ENSG00000108771	DHX58	1179.43540560839	0.346950379955023	0.109555695338983	0.9967218123963947	1	1	1	0.0701098343791261	0.9999564931685331	1	1
ENSG00000108773	KAT2A	25.0024708526371	0.0111369458061849	5.96819872876143e-4	1.865139656054282e-7	3.395447491056913e-4	0.04396060284865666	0.4982660392758619	9.245604282170916e-11	1.0815051076917825e-9	1.0969748220901465e-8	9.609678486288686e-8
ENSG00000108774	RAB5C	27.1719002119288	0.0120915984261668	0.00253173263757852	2.698690925173608e-7	5.645708110116887e-4	0.06774818866060006	0.6113260327365406	1.2468222010397767e-9	1.2327059295547116e-7	6.56331070725269e-6	1.8934063061781803e-4
ENSG00000108784	NAGLU	106.318924116745	0.0457026433540759	0.0179561537824021	3.9765591409690604e-4	0.5333522524084899	0.9998295646550787	0.9999999999996364	1.8429919581564036e-6	0.006451790431058924	0.3707212544158667	0.9677470594013226
ENSG00000108786	HSD17B1	677.191220193387	0.233740602095358	0.00271279314408185	0.8392558910447463	1	1	1	1.4807886028478379e-9	1.663175296373609e-7	9.628305832842798e-6	2.8929237054209356e-4
ENSG00000108788	MLX	30.7519267189114	0.013662956967337	0.00102334714016537	4.762667159541323e-7	0.0012044456829276573	0.1233734215076806	0.7680927602951658	2.0058299465830487e-10	4.616048654426663e-9	8.266038509230356e-8	1.1523354186415702e-6
ENSG00000108797	CNTNAP1	71.4474724000478	0.0311800611886661	0.0137206524395455	3.925820300654248e-5	0.13175103780580677	0.9596106898880594	0.9999984357419759	4.858887996395111e-7	0.0012363347325876628	0.12582021293592438	0.7729536808510815
ENSG00000108799	EZH1	12.1411210389512	0.00543922645594206	0.00229288937830368	1.1444253100734159e-8	5.09795325831508e-6	6.083593054371228e-4	0.020023446157270475	9.829260738669632e-10	8.123797434755886e-8	3.8314059657151844e-6	1.036407193488742e-4
ENSG00000108826	MRPL27	214.646381710944	0.0881632681129247	0.0729381019755417	0.02156413075667074	0.9974283765788253	0.9999999999999966	1	0.007078671287985783	0.9723425114163273	0.9999999999272084	1
ENSG00000108828	VAT1	206.054928548294	0.0849341563225006	2.34772567710451e-4	0.017404933500575703	0.995568912398403	0.9999999999999687	1	3.658251479521368e-11	1.7487700176843646e-10	8.140670360035074e-10	3.5802317777111625e-9
ENSG00000108829	LRRC59	17.1821623914347	0.0076802697072588	0.00647854050203077	3.994151609454377e-8	3.597951665057497e-5	0.005114441248048607	0.122988252173443	2.1113863102328878e-8	1.3468438512242997e-5	0.0017987493618918382	0.05258748433218696
ENSG00000108839	ALOX12	69.5002261576412	0.030356068701631	0.0162418587782564	3.354317345294344e-5	0.11627454042927943	0.9485566314167249	0.9999966880366666	1.1066071975429637e-6	0.0035029624425930717	0.25858567789864106	0.9222153821814287
ENSG00000108846	ABCC3	1474.75678075323	0.399148541640291	0.374623650404984	0.9996912882297727	1	1	1	0.9990264239489258	1	1	1
ENSG00000108852	MPP2	710.23468961906	0.24238150347998	0.18628604230146	0.8719382961163897	1	1	1	0.5593160083855786	0.9999999999998689	1	1
ENSG00000108854	SMURF2	96.8131256970136	0.0417871966552708	0.0394577676067685	2.290742318782346e-4	0.4131715322609689	0.9990891245573177	0.9999999999685277	1.6128133744475193e-4	0.3422728536870058	0.9976875444443362	0.9999999995998881
ENSG00000108861	DUSP3	295.543853090126	0.117487060592117	0.10505563998701101	0.09930298101326318	0.9999920418307544	1	1	0.05643198263600446	0.9998906486669561	1	1
ENSG00000108883	EFTUD2	57.9727927552386	0.0254492911151585	0.0142778537482622	1.215692312261929e-5	0.047766987415946094	0.8191033584079206	0.9997911035159278	5.877368137729988e-7	0.0015822664067878245	0.15090587614906392	0.8164139170751803
ENSG00000108932	SLC16A6	311.917915559792	0.123194323813941	0.0667736690717314	0.12444289913919104	0.9999977822228147	1	1	0.004143005920516085	0.9376095618476239	0.9999999970267848	1
ENSG00000108950	FAM20A	98.6399025372983	0.0425421396523696	0.0390245816310992	2.556952854605443e-4	0.436472509387581	0.9993337246398981	0.9999999999864442	1.5078680171465297e-4	0.3293879301397785	0.9972657440317936	0.9999999993641786
ENSG00000108953	YWHAE	13.1635062002589	0.00589455548763499	0.0030530726132329	1.5086489502103007e-8	7.927979107202887e-6	0.0010016121753740892	0.0315156734516453	2.011714572702772e-9	2.8238044125217243e-7	1.881659811953096e-5	6.004034967866945e-4
ENSG00000108960	MMD	23.8663621819833	0.0106362671967573	0.0110437508370628	1.5238512618420685e-7	2.5580349068410335e-4	0.03421707338627189	0.4365630079477447	1.7970991861293584e-7	3.2240058157018137e-4	0.04201194965755295	0.48683661496700736
ENSG00000108963	DPH1	164.848512600977	0.0691232636915747	0.0647738155406399	0.00511481731964103	0.9537414275474092	0.9999999992598415	1	0.003439443578777235	0.9203941795099293	0.9999999905174677	1
ENSG00000109016	DHRS7B	92.2766944294972	0.0399072890592207	0.0375157453263375	1.7282540080776343e-4	0.3557665298348891	0.9980603268187959	0.9999999997533798	1.1866002087423944e-4	0.28563087387860053	0.9951695275933546	0.9999999968860702
ENSG00000109046	WSB1	89.6288069067847	0.038806585126907	0.0338473312034014	1.457302404822558e-4	0.3229525339442758	0.9970272655704601	0.9999999991982244	6.387904988003346e-5	0.18951517335979762	0.9825472811730596	0.9999998747133582
ENSG00000109062	SLC9A3R1	117.485791806419	0.0502616068162815	0.00868142451524786	7.164498261661434e-4	0.6632017424041343	0.9999793513682192	0.9999999999999984	6.488644654911724e-8	7.446268250022037e-5	0.010676511004535039	0.2109370847538743
ENSG00000109063	MYH3	395.361252117053	0.15116888796797	0.102143716180007	0.2935012514219074	0.9999999976657978	1	1	0.04864069062278498	0.999804839616948	1	1
ENSG00000109065	NAT9	23.6346611631739	0.0105340952215995	9.48812501937767e-4	1.4611792320540218e-7	2.410777534826991e-4	0.03244116571060507	0.4239412582455926	1.7772394667048275e-10	3.6891931731730665e-9	6.070223634857541e-8	7.917549564862014e-7
ENSG00000109066	TMEM104	15.2399961010351	0.0068180580732353	0.00199715373357842	2.545528687836196e-8	1.8023383556942107e-5	0.0024660118143324805	0.06859618360670805	7.1763683884285e-10	4.656612428988183e-8	1.8526662470819133e-6	4.537434173135235e-5
ENSG00000109084	TMEM97	767.349552346307	0.256866342187381	0.0927910414686858	0.9149574893699622	1	1	1	0.0287868103291965	0.9988613154499011	0.9999999999999999	1
ENSG00000109099	PMP22	94.0685336911828	0.040650712077716	0.0425748323965702	1.9346636618688962e-4	0.37831176285593915	0.9985557941830847	0.9999999998900083	2.569052015052309e-4	0.43748260110444703	0.9993427623906004	0.9999999999869323
ENSG00000109107	ALDOC	114.264083586935	0.0489507954092973	0.0177380512109025	6.081866044708173e-4	0.627689430721202	0.9999614828959128	0.9999999999999923	1.730581494996386e-6	0.005992460590914961	0.3558667988051275	0.9636935704998367
ENSG00000109113	RAB34	175.543716395096	0.0732792790186524	0.0213098815448382	0.007280209446089092	0.9736302470256638	0.9999999999410563	1	4.555199010103372e-6	0.01776952876305704	0.5994050664085039	0.9957874311701657
ENSG00000109133	TMEM33	20.8114406061959	0.00928745731526875	0.0097593988309437	8.557616426596582e-8	1.1181971393614543e-4	0.01586482698274183	0.27532911627429557	1.0532743699442904e-7	1.5109334813556696e-4	0.021109271516203343	0.32977317542297235
ENSG00000109180	OCIAD1	151.002080892878	0.0636870300999541	0.0420432202302842	0.0031001547248922234	0.9095149561223221	0.9999999823576623	1	2.3782404112437927e-4	0.4210662805619775	0.9991803015584481	0.9999999999763245
ENSG00000109189	USP46	10.4565261985052	0.00468806545910439	0.00515985801983742	7.02616620440466e-9	2.3084618070434715e-6	2.4305915488687102e-4	0.008373729823542453	9.59299950586967e-9	3.83481970878119e-6	4.3892842853143765e-4	0.014760625324504173
ENSG00000109270	LAMTOR3	29.0212162211408	0.0129039317245317	3.31189399847404e-4	3.640816454986151e-7	8.448906734865869e-4	0.09385808716084842	0.6979800247597375	4.8818393771909996e-11	3.135246506857925e-10	1.8879946495076183e-9	1.0481710721599313e-8
ENSG00000109272	PF4V1	1787.18421129687	0.445995022204999	0.340172698492477	0.9999710566357827	1	1	1	0.9956481026338465	1	1	1
ENSG00000109320	NFKB1	60.4986827821866	0.0265287076195013	0.0218380193363336	1.538845851711823e-5	0.05946955801599352	0.8589118276158444	0.9999117222673016	5.202196712406071e-6	0.020454777753591613	0.632797018303899	0.9970460415372071
ENSG00000109323	MANBA	66.6422693035051	0.0291441605003671	0.0099184245121565	2.6443975520318297e-5	0.09561417407977624	0.9277038208212416	0.999990283474093	1.1279795220087152e-7	1.6674153536444525e-4	0.023144409900890617	0.34874003197486236
[truncated: 6,726 more rows]
