# Supplementary material for: Genome-wide identification of genes regulating DNA methylation using genetic anchors for causal inference
Source: Genome Biol. 2020 Aug 28;21:220. doi: 10.1186/s13059-020-02114-z (PMC7453518; doi:10.1186/s13059-020-02114-z)
Supplement: Supplementary file 2 — Additional file 2: Table S2. Significant associations (P < 1.4 x 10-11) between GIs and trans CpGs, without taking LD/pleiotropy among neighboring genes into account. [file 13059_2020_2114_MOESM2_ESM.csv]

Ensembl_ID	HGNC_ID	Chr_gene	CpG	Chr_CpG	CpG_pos	Test_statistic	P_value
ENSG00000097021	ACOT7	1	cg15015518	1	17035497	-9.84039357463112	1.35126613331144e-22
ENSG00000159346	ADIPOR1	1	cg19743820	5	85913790	8.05826565096016	1.00988075064814e-15
ENSG00000188157	AGRN	1	cg09027357	8	256911	-7.78401852297876	8.86406614555964e-15
ENSG00000176092	AIM1L	1	cg20449648	1	226496944	-8.25586302125667	2.0209776785044e-16
ENSG00000176092	AIM1L	1	cg21879320	1	185125698	-8.73778616802878	3.42689063425715e-18
ENSG00000269554	AL590822.2	1	cg20148285	1	24018143	11.1250800089704	2.43572672124215e-28
ENSG00000143595	AQP10	1	cg02835499	17	46178918	9.40890961563133	8.17495983471659e-21
ENSG00000143595	AQP10	1	cg25748542	3	119393058	18.2443780860731	1.59386305666186e-71
ENSG00000132694	ARHGEF11	1	cg23112950	11	66369765	-18.0742874083998	2.79466424696863e-70
ENSG00000197785	ATAD3A	1	cg16196077	10	64028521	-31.0593330609755	4.12002608280588e-190
ENSG00000160072	ATAD3B	1	cg06982628	22	38597918	-7.46189885001587	1.0385340243228e-13
ENSG00000160072	ATAD3B	1	cg15271056	8	87520737	-7.50275629634734	7.64201035413911e-14
ENSG00000160072	ATAD3B	1	cg16196077	10	64028521	-10.3406389542285	9.37312853804043e-25
ENSG00000159363	ATP13A2	1	cg02986733	6	41738046	13.6313304806865	2.12245434811023e-41
ENSG00000159363	ATP13A2	1	cg05350020	18	77479228	9.34339819577704	1.50130603008645e-20
ENSG00000159363	ATP13A2	1	cg08903465	1	234917213	-6.82540521326131	1.00754665935933e-11
ENSG00000159363	ATP13A2	1	cg10210806	1	6514605	9.89781781300278	7.72669611073807e-23
ENSG00000159363	ATP13A2	1	cg16672535	1	6510652	12.8435803019181	4.91546325929885e-37
ENSG00000159363	ATP13A2	1	cg19809453	1	6508028	-7.7679064438599	1.00484877585971e-14
ENSG00000159363	ATP13A2	1	cg23685870	1	145382340	-10.9344015814333	1.90749257288224e-27
ENSG00000143515	ATP8B2	1	cg25748542	3	119393058	27.8228110054082	5.123602007441e-156
ENSG00000162650	ATXN7L2	1	cg05051117	1	205719564	-9.61176569040424	1.21373242127077e-21
ENSG00000162885	B3GALNT2	1	cg25579656	19	54290523	9.74252931975638	3.47855527556898e-22
ENSG00000176022	B3GALT6	1	cg00016238	1	244374065	-13.2764641982414	2.09978631234863e-39
ENSG00000176022	B3GALT6	1	cg01029838	7	77428748	14.4070648366304	6.31666405593914e-46
ENSG00000176022	B3GALT6	1	cg16196077	10	64028521	-15.5625247789893	4.4274798005834e-53
ENSG00000176022	B3GALT6	1	cg25623347	1	116943772	8.00218610634259	1.58368989302039e-15
ENSG00000142867	BCL10	1	cg13096820	1	155054597	-7.37816667067705	1.93770493438597e-13
ENSG00000142867	BCL10	1	cg13179130	1	24070416	-9.29060637912579	2.44310308692546e-20
ENSG00000178096	BOLA1	1	cg15404665	19	4724679	-8.91616941944791	7.17157188291975e-19
ENSG00000178096	BOLA1	1	cg21209604	6	26032199	8.45790171277744	3.75595489635983e-17
ENSG00000178096	BOLA1	1	cg26504026	6	26020944	11.8601429949786	6.42113421194997e-32
ENSG00000131591	C1orf159	1	cg01145430	15	45670526	-18.3538382951897	2.49332816639524e-72
ENSG00000131591	C1orf159	1	cg05880817	15	49913015	-11.9307073375778	2.83763333263833e-32
ENSG00000131591	C1orf159	1	cg13916322	11	63381728	8.29155664923408	1.50540370640944e-16
ENSG00000228594	C1orf233	1	cg01226742	8	37699923	7.74860852959999	1.16734355679381e-14
ENSG00000228594	C1orf233	1	cg02250400	8	37698620	7.06038889615674	1.94588241512475e-12
ENSG00000228594	C1orf233	1	cg05552035	8	37699239	8.07980265956483	8.48959822194041e-16
ENSG00000228594	C1orf233	1	cg12280407	13	77460322	7.52895421901582	6.27236478254388e-14
ENSG00000228594	C1orf233	1	cg12424646	8	37699507	7.95585523541978	2.29157981314342e-15
ENSG00000228594	C1orf233	1	cg12869334	8	37699360	7.94549682889221	2.48823315264169e-15
ENSG00000228594	C1orf233	1	cg13853186	9	975997	-6.79990122145958	1.20063273412921e-11
ENSG00000228594	C1orf233	1	cg16196077	10	64028521	-28.0200931074984	5.03353926554966e-158
ENSG00000228594	C1orf233	1	cg26629969	19	51069496	-10.1204293792997	8.60022078364854e-24
ENSG00000117616	C1orf63	1	cg24708006	6	85483055	8.43752604647011	4.45839113785802e-17
ENSG00000162585	C1orf86	1	cg20148285	1	24018143	13.2460283837865	3.09807776614187e-39
ENSG00000116161	CACYBP	1	cg13849727	9	15810627	-12.2182456529212	9.72400281879451e-34
ENSG00000137944	CCBL2	1	cg10441013	1	160039990	-8.67353504986755	5.97604042671207e-18
ENSG00000159588	CCDC17	1	cg20693607	3	184319566	-6.80315399756463	1.17412283372758e-11
ENSG00000186409	CCDC30	1	cg17459298	12	43946341	12.9267276110281	1.74579262078527e-37
ENSG00000134256	CD101	1	cg08049136	19	10765744	-14.0852487859117	5.07603251464877e-44
ENSG00000134256	CD101	1	cg08053686	4	6223581	-9.01130249263268	3.07669951135739e-19
ENSG00000117281	CD160	1	cg03593595	3	132977031	8.66940555524333	6.19268025391395e-18
ENSG00000169442	CD52	1	cg08108911	1	157015297	-6.84125067289834	9.03279360028238e-12
ENSG00000169442	CD52	1	cg20449648	1	226496944	-16.6719023314066	2.10324759330542e-60
ENSG00000169442	CD52	1	cg21879320	1	185125698	-9.46207650706097	4.97710562925749e-21
ENSG00000143119	CD53	1	cg15830792	10	64893214	13.2261446016305	3.9926079803748e-39
ENSG00000196352	CD55	1	cg05958702	16	30960101	10.9877047474587	1.07655658197865e-27
ENSG00000197622	CDC42SE1	1	cg15404665	19	4724679	-8.99201665047678	3.65500448682069e-19
ENSG00000008128	CDK11A	1	cg13474004	8	1783980	7.10505532307893	1.41515357163162e-12
ENSG00000008128	CDK11A	1	cg17746819	1	100715586	10.3816865051516	6.17045291875497e-25
ENSG00000248333	CDK11B	1	cg12657025	1	234878498	-11.5507190461989	2.187317271241e-30
ENSG00000248333	CDK11B	1	cg17743732	2	238705221	6.905312131748	5.79379013054354e-12
ENSG00000248333	CDK11B	1	cg17746819	1	100715586	15.1480847579262	1.85531746527898e-50
ENSG00000130695	CEP85	1	cg19403339	2	183580841	-7.95121887024317	2.37763193190238e-15
ENSG00000130695	CEP85	1	cg20449648	1	226496944	8.15932143980251	4.45575633004117e-16
ENSG00000130695	CEP85	1	cg21879320	1	185125698	8.47614807453064	3.22033067366827e-17
ENSG00000000971	CFH	1	cg07222861	1	32355084	-9.00041889835823	3.3909164599763e-19
ENSG00000131778	CHD1L	1	cg02953927	15	44038812	-18.9551744252905	7.92189039483284e-77
ENSG00000162368	CMPK1	1	cg00977256	18	77793479	-7.25889856741802	4.65745970897792e-13
ENSG00000162368	CMPK1	1	cg00999644	16	20817639	-14.4433536245156	3.83052873121505e-46
ENSG00000142675	CNKSR1	1	cg20449648	1	226496944	-15.5546364726286	4.97335306888036e-53
ENSG00000127054	CPSF3L	1	cg00974835	14	74960278	7.42109039513403	1.40861281140501e-13
ENSG00000127054	CPSF3L	1	cg03686870	4	103682143	-8.31678176255626	1.22164752407853e-16
ENSG00000127054	CPSF3L	1	cg06982628	22	38597918	7.34873598703539	2.40885815833325e-13
ENSG00000127054	CPSF3L	1	cg16196077	10	64028521	15.630720190487	1.61697499255326e-53
ENSG00000127054	CPSF3L	1	cg25623347	1	116943772	-12.6052047633928	9.24267369122675e-36
ENSG00000143578	CREB3L4	1	cg07567777	19	51524441	-11.3875934944834	1.35736127967204e-29
ENSG00000058453	CROCC	1	cg00014168	1	6511878	-9.71980727195759	4.32709842959797e-22
ENSG00000058453	CROCC	1	cg02986733	6	41738046	-17.3629295404023	3.47809607299737e-65
ENSG00000058453	CROCC	1	cg05350020	18	77479228	-12.3413238502089	2.24364016752921e-34
ENSG00000058453	CROCC	1	cg08903465	1	234917213	6.94373824684955	4.43067882472193e-12
ENSG00000058453	CROCC	1	cg10210806	1	6514605	-13.4800824592196	1.52435657780908e-40
ENSG00000058453	CROCC	1	cg16672535	1	6510652	-16.9515908576414	2.55683636681017e-62
ENSG00000058453	CROCC	1	cg19809453	1	6508028	10.3215717487929	1.13762137429221e-24
ENSG00000058453	CROCC	1	cg23685870	1	145382340	15.3456594413021	1.06193184435464e-51
ENSG00000058453	CROCC	1	cg23919534	1	6507804	7.28786079617983	3.76876920524011e-13
ENSG00000058453	CROCC	1	cg25600478	1	145382477	11.1392411158577	2.08773752102085e-28
ENSG00000215908	CROCCP2	1	cg01800128	1	144815302	-11.256694908198	5.77203141621689e-29
ENSG00000215908	CROCCP2	1	cg02880315	3	49724254	12.9434794076257	1.4161122169799e-37
ENSG00000215908	CROCCP2	1	cg02986733	6	41738046	10.109811303643	9.55955373583067e-24
ENSG00000215908	CROCCP2	1	cg04581025	3	49727474	7.10523005906857	1.41338630849815e-12
ENSG00000215908	CROCCP2	1	cg10210806	1	6514605	6.90544510255562	5.78842875105776e-12
ENSG00000215908	CROCCP2	1	cg14873885	3	49726775	15.3054203460606	1.90662915379919e-51
ENSG00000215908	CROCCP2	1	cg22290284	3	49726443	8.29301792908266	1.4873234417397e-16
ENSG00000215908	CROCCP2	1	cg25036710	1	149228170	9.7875966177303	2.25301249113411e-22
ENSG00000163131	CTSS	1	cg15404665	19	4724679	9.61633671414591	1.16216259144578e-21
ENSG00000159348	CYB5R1	1	cg19743820	5	85913790	11.194390761573	1.14335714541176e-28
ENSG00000159348	CYB5R1	1	cg25914270	5	85913777	7.79172300201623	8.3473785738747e-15
ENSG00000132676	DAP3	1	cg03489965	15	65368982	6.78520039197664	1.32794360063338e-11
ENSG00000132676	DAP3	1	cg05790982	4	4861404	8.07858763604712	8.57323928109683e-16
ENSG00000132676	DAP3	1	cg06200634	11	118966695	8.36333870575042	8.29568237705678e-17
ENSG00000116133	DHCR24	1	cg18517677	9	131799243	10.4552297659546	2.9062754512131e-25
ENSG00000156171	DRAM2	1	cg15830792	10	64893214	-7.1746925007518	8.58090278835276e-13
ENSG00000203965	EFCAB7	1	cg02609781	13	50656090	19.1789264480227	1.56457129817103e-78
ENSG00000169242	EFNA1	1	cg05790982	4	4861404	-10.4596019555142	2.77862550021482e-25
ENSG00000074800	ENO1	1	cg00479240	10	30347670	7.15495642866163	9.89264357587038e-13
ENSG00000074800	ENO1	1	cg00994804	21	36259383	-6.81956441890277	1.04888318088201e-11
ENSG00000074800	ENO1	1	cg01899542	16	49732224	6.8585213800851	8.01667153780336e-12
ENSG00000074800	ENO1	1	cg02380135	2	149866270	7.72997146330326	1.34872358386059e-14
ENSG00000074800	ENO1	1	cg03142697	21	36258497	-7.1400669281844404	1.10106977098432e-12
ENSG00000074800	ENO1	1	cg04086531	16	49732376	7.12776054359946	1.20276593490152e-12
ENSG00000074800	ENO1	1	cg07633317	16	49732623	7.18389864093475	8.02898305593711e-13
ENSG00000074800	ENO1	1	cg08498747	17	41747669	8.60035011097681	1.12064941358032e-17
ENSG00000074800	ENO1	1	cg09092525	20	58570133	7.34904583463881	2.40335501756406e-13
ENSG00000074800	ENO1	1	cg09827249	10	135051256	-7.47050748844557	9.73665216757796e-14
ENSG00000074800	ENO1	1	cg11326574	12	59271109	7.33476125463365	2.67036156646432e-13
ENSG00000074800	ENO1	1	cg12477880	21	36259241	-6.80426975906094	1.16516225049896e-11
ENSG00000074800	ENO1	1	cg12525736	1	228269915	-8.50199329041178	2.58834088213365e-17
ENSG00000074800	ENO1	1	cg20676788	13	49379791	6.89499109869315	6.22513237563768e-12
ENSG00000074800	ENO1	1	cg22698744	21	36263808	-7.50393172892114	7.5746938229269e-14
ENSG00000074800	ENO1	1	cg23068772	7	30737061	7.50094737519744	7.74675741423212e-14
ENSG00000074800	ENO1	1	cg25162533	17	81032067	7.36457661903977	2.14278903839523e-13
ENSG00000074800	ENO1	1	cg26929700	16	49732567	6.88064655355629	6.87731755901356e-12
ENSG00000085832	EPS15	1	cg27110877	5	77940704	-11.6663565419981	5.91052298864739e-31
ENSG00000187017	ESPN	1	cg11404039	4	155471778	12.5697035696057	1.42464514293435e-35
ENSG00000067208	EVI5	1	cg07272042	16	85860163	7.19522451746382	7.39762721760358e-13
ENSG00000067208	EVI5	1	cg07340025	5	14926200	7.80908015024692	7.28953892839145e-15
ENSG00000067208	EVI5	1	cg16875057	2	169006003	7.16074803855557	9.48854425535725e-13
ENSG00000067208	EVI5	1	cg24334029	20	58296208	-8.38054062011519	7.1865700501566e-17
ENSG00000117480	FAAH	1	cg20693607	3	184319566	-12.8753053334203	3.31390952290823e-37
ENSG00000116199	FAM20B	1	cg04525335	16	85877183	16.790815604742	3.25072914557437e-61
ENSG00000157870	FAM213B	1	cg05998672	11	986408	13.8027473192408	2.21822094117154e-42
ENSG00000157870	FAM213B	1	cg06780875	7	116331685	9.06423924844206	1.91421430877788e-19
ENSG00000037637	FBXO42	1	cg00014168	1	6511878	-10.2808689468047	1.71818860333266e-24
ENSG00000037637	FBXO42	1	cg01800128	1	144815302	9.82318234311804	1.59676270401165e-22
ENSG00000037637	FBXO42	1	cg02880315	3	49724254	-9.63493791331814	9.73751468989216e-22
ENSG00000037637	FBXO42	1	cg10210806	1	6514605	-8.19677398176573	3.28222360162036e-16
ENSG00000150337	FCGR1A	1	cg15404665	19	4724679	-10.7468402615454	1.39865387410608e-26
ENSG00000150337	FCGR1A	1	cg26753088	19	1293582	-13.935752461276	3.77889806097935e-43
ENSG00000143226	FCGR2A	1	cg18430411	8	144873183	11.3275035253783	2.64306285498692e-29
ENSG00000131781	FMO5	1	cg02953927	15	44038812	12.0869582271627	4.57900132016823e-33
ENSG00000177628	GBA	1	cg05790982	4	4861404	-9.82436994096075	1.57848923681586e-22
ENSG00000177628	GBA	1	cg06200634	11	118966695	-7.93678627770003	2.66639847718722e-15
ENSG00000162654	GBP4	1	cg02351018	17	50960629	-8.18021620058754	3.75775854283456e-16
ENSG00000154451	GBP5	1	cg02351018	17	50960629	-11.6139838527703	1.07065823564913e-30
ENSG00000152904	GGPS1	1	cg25579656	19	54290523	-11.0453606083614	5.78183062020569e-28
ENSG00000224051	GLTPD1	1	cg03686870	4	103682143	-7.32683726018026	2.83083003456475e-13
ENSG00000224051	GLTPD1	1	cg16196077	10	64028521	13.516235279596	9.53238898530866e-41
ENSG00000224051	GLTPD1	1	cg25623347	1	116943772	-7.54590510100653	5.51799898496815e-14
ENSG00000134183	GNAT2	1	cg05051117	1	205719564	7.0663913132682	1.86456398427859e-12
ENSG00000143167	GPA33	1	cg11678250	7	136362483	12.355282904788	1.89823811015949e-34
ENSG00000158292	GPR153	1	cg11404039	4	155471778	10.2241666919079	3.04393793715021e-24
ENSG00000213366	GSTM2	1	cg17024258	1	160370982	7.93419791562121	2.72172196372091e-15
ENSG00000137947	GTF2B	1	cg10441013	1	160039990	8.74406359906693	3.24499740740477e-18
ENSG00000143774	GUK1	1	cg03415695	22	46440562	6.80540604461743	1.15610571967186e-11
ENSG00000143774	GUK1	1	cg05357861	7	51460827	8.96303035332626	4.7318688779864e-19
ENSG00000143774	GUK1	1	cg22087953	7	45847100	-7.25164867603967	4.91034830044756e-13
ENSG00000163041	H3F3A	1	cg05756415	17	40761330	6.88423096890181	6.70833239985152e-12
ENSG00000143630	HCN3	1	cg05790982	4	4861404	7.91889093603467	3.07277699132407e-15
ENSG00000143630	HCN3	1	cg06200634	11	118966695	7.61528498633091	3.25673183083522e-14
ENSG00000188290	HES4	1	cg01145430	15	45670526	21.0689494828546	1.40444755965871e-93
ENSG00000188290	HES4	1	cg05880817	15	49913015	7.82597226912502	6.38717096980577e-15
ENSG00000188290	HES4	1	cg07742842	5	118416915	-9.78136369402133	2.39276911531778e-22
ENSG00000188290	HES4	1	cg19163939	7	944607	-8.22273139718877	2.65353683789554e-16
ENSG00000188290	HES4	1	cg25887236	18	74844781	7.68897419861826	1.85098210871293e-14
ENSG00000184678	HIST2H2BE	1	cg15404665	19	4724679	8.91603022190843	7.18041326227178e-19
ENSG00000184678	HIST2H2BE	1	cg21209604	6	26032199	-8.45783957289661	3.7579214624503e-17
ENSG00000184678	HIST2H2BE	1	cg26504026	6	26020944	-11.8600335240055	6.42925195216413e-32
ENSG00000181218	HIST3H2A	1	cg03054480	14	54421480	-8.53026657107722	2.0366590684043e-17
ENSG00000127124	HIVEP3	1	cg06770429	6	143206075	12.0828907708464	4.80299857073241e-33
ENSG00000198830	HMGN2	1	cg20449648	1	226496944	11.4188043849734	9.58995292836562e-30
ENSG00000153936	HS2ST1	1	cg10681811	5	76904661	7.46846234255116	9.8870554078555e-14
ENSG00000153936	HS2ST1	1	cg14655345	4	185659507	9.07968786862083	1.66583668027137e-19
ENSG00000173110	HSPA6	1	cg20962211	2	183580829	10.2132056700232	3.39859401588067e-24
ENSG00000142798	HSPG2	1	cg18855080	1	172748189	-7.30323940974814	3.36694142959038e-13
ENSG00000162729	IGSF8	1	cg07187863	1	32229600	7.56001804411845	4.95860079098691e-14
ENSG00000160712	IL6R	1	cg15312497	10	31192123	14.3736526734504	1.00015093859661e-45
ENSG00000160712	IL6R	1	cg24665000	14	42582755	12.0642399057032	5.97776949881007e-33
ENSG00000160712	IL6R	1	cg25748542	3	119393058	-11.9471190905867	2.34527664513488e-32
ENSG00000197429	IPP	1	cg20693607	3	184319566	-6.96949324044188	3.69872383538995e-12
ENSG00000117595	IRF6	1	cg01744729	13	113474194	7.89073570418532	3.83877663756258e-15
ENSG00000142856	ITGB3BP	1	cg02609781	13	50656090	7.06294841552452	1.91079004560554e-12
ENSG00000177272	KCNA3	1	cg15830792	10	64893214	21.470521736458	6.37471955082468e-97
ENSG00000069424	KCNAB2	1	cg13925809	9	84646696	-10.7071358090667	2.123691727575e-26
ENSG00000069424	KCNAB2	1	cg13928313	7	2802073	-18.7284113081574	4.06650873445087e-75
ENSG00000117139	KDM5B	1	cg00056066	10	25010738	8.14708316384065	4.92240181519246e-16
ENSG00000117139	KDM5B	1	cg00441434	8	26434054	6.91215602601985	5.52407088592601e-12
ENSG00000117139	KDM5B	1	cg00782200	2	145280523	7.56066356387861	4.93439432412512e-14
ENSG00000117139	KDM5B	1	cg00926318	20	25177340	7.38552122887884	1.834895392932e-13
ENSG00000117139	KDM5B	1	cg01102073	3	128204813	7.34575076541048	2.46251645220555e-13
ENSG00000117139	KDM5B	1	cg01620611	17	71306145	7.77830015247194	9.26779415268771e-15
ENSG00000117139	KDM5B	1	cg05313153	8	119122430	8.36783043197229	7.99076075435087e-17
ENSG00000117139	KDM5B	1	cg05368038	15	31621727	7.59765622417545	3.7252485843416e-14
ENSG00000117139	KDM5B	1	cg05734456	6	41516085	7.23178020123761	5.67456921482424e-13
ENSG00000117139	KDM5B	1	cg05877497	2	66667946	8.07670046330411	8.70476343345806e-16
ENSG00000117139	KDM5B	1	cg06115614	3	128205143	7.89027798872798	3.85266800910036e-15
ENSG00000117139	KDM5B	1	cg07529210	12	122019110	6.85870759246987	8.0063507724264e-12
ENSG00000117139	KDM5B	1	cg09317239	10	21818060	7.523469862301	6.53749318319774e-14
ENSG00000117139	KDM5B	1	cg09484541	5	74161187	7.46208824597431	1.03706217175928e-13
ENSG00000117139	KDM5B	1	cg15234492	12	122019076	7.54890516384619	5.39411460553915e-14
ENSG00000117139	KDM5B	1	cg19743820	5	85913790	52.0577619123925	0
ENSG00000117139	KDM5B	1	cg19961766	15	31621796	7.21117191988192	6.59054834686322e-13
ENSG00000117139	KDM5B	1	cg20184247	17	46672052	6.92181479273378	5.16425503514329e-12
ENSG00000117139	KDM5B	1	cg21249371	12	122019117	7.27377307045356	4.17799924133444e-13
ENSG00000117139	KDM5B	1	cg22726349	1	2990678	7.16522150522901	9.18755121539099e-13
ENSG00000117139	KDM5B	1	cg25914270	5	85913777	29.8775247123295	2.20181625651859e-177
ENSG00000117139	KDM5B	1	cg26537478	2	66668012	10.3505677789092	8.47280689605537e-25
ENSG00000142945	KIF2C	1	cg18526140	14	106444894	-7.51302124116689	7.07346129394757e-14
ENSG00000187961	KLHL17	1	cg01145430	15	45670526	-20.4520362023376	1.53031391100759e-88
ENSG00000187961	KLHL17	1	cg05880817	15	49913015	-8.01780657035222	1.39756504645299e-15
ENSG00000187961	KLHL17	1	cg07742842	5	118416915	9.57984921537015	1.64266484156829e-21
ENSG00000187961	KLHL17	1	cg19163939	7	944607	7.99476129569911	1.68052335298509e-15
ENSG00000187961	KLHL17	1	cg25887236	18	74844781	-7.58629738548984	4.06162539373854e-14
ENSG00000076321	KLHL20	1	cg13849727	9	15810627	-10.4389810114967	3.43372092312204e-25
ENSG00000157978	LDLRAP1	1	cg24623068	5	154317667	-20.1360205614183	5.22782747050174e-86
ENSG00000133067	LGR6	1	cg14097425	9	21559551	-7.52232300961896	6.59431273470367e-14
ENSG00000121931	LRIF1	1	cg15830792	10	64893214	18.459155885854	4.14742861303894e-73
ENSG00000198799	LRIG2	1	cg17566920	6	141939449	7.34796295375478	2.42264188801478e-13
ENSG00000132128	LRRC41	1	cg02992639	1	155098827	6.79126408854931	1.27390393189358e-11
ENSG00000132128	LRRC41	1	cg03492827	7	72838601	7.7482730845363	1.17038543184177e-14
ENSG00000132128	LRRC41	1	cg12210255	7	72838671	7.59954647404414	3.67199644608129e-14
ENSG00000132128	LRRC41	1	cg17077610	10	22766143	6.90938133659293	5.63190469740058e-12
ENSG00000132128	LRRC41	1	cg19731612	5	176559334	7.05392096907059	2.03740387676032e-12
ENSG00000132128	LRRC41	1	cg22953960	10	22766081	7.38087955845504	1.89913875939309e-13
ENSG00000132128	LRRC41	1	cg24360241	2	233370823	7.17668500428214	8.45837645268398e-13
ENSG00000132128	LRRC41	1	cg25317631	11	44541905	7.00036376019341	2.97645142220917e-12
ENSG00000212916	MAP10	1	cg00953777	1	11714506	15.0692127676223	5.7594413374105e-50
ENSG00000086015	MAST2	1	cg20693607	3	184319566	-7.00460520797371	2.88871427795127e-12
ENSG00000198625	MDM4	1	cg01779076	2	201980642	7.93743581434531	2.65269011213324e-15
ENSG00000162591	MEGF6	1	cg20075270	10	46168220	-7.28912223442945	3.73410821054717e-13
ENSG00000158887	MPZ	1	cg18430411	8	144873183	8.58580467682564	1.26905572184104e-17
ENSG00000158887	MPZ	1	cg20962211	2	183580829	-6.79669637490244	1.22732531124478e-11
ENSG00000242485	MRPL20	1	cg01029838	7	77428748	-7.3370743542545	2.62522848434073e-13
ENSG00000242485	MRPL20	1	cg16196077	10	64028521	46.2096536513206	0
ENSG00000014914	MTMR11	1	cg15404665	19	4724679	-10.2970694995902	1.45839430277431e-24
ENSG00000014914	MTMR11	1	cg26753088	19	1293582	-12.6252765394409	7.23341029078312e-36
ENSG00000173171	MTX1	1	cg05790982	4	4861404	-17.3811603197717	2.5878649002091e-65
ENSG00000173171	MTX1	1	cg06200634	11	118966695	-7.09119876880996	1.56242469505532e-12
ENSG00000162576	MXRA8	1	cg03686870	4	103682143	-7.00291972416317	2.9232715861708e-12
ENSG00000162576	MXRA8	1	cg06982628	22	38597918	7.72320787385415	1.42118672460829e-14
ENSG00000162576	MXRA8	1	cg15271056	8	87520737	7.74089996931481	1.23925182875919e-14
ENSG00000162576	MXRA8	1	cg16196077	10	64028521	16.783365445354	3.65537525335806e-61
ENSG00000219481	NBPF1	1	cg00014168	1	6511878	12.1238747949514	2.96636684298322e-33
ENSG00000219481	NBPF1	1	cg01800128	1	144815302	-17.063637715968	4.29301343729061e-63
ENSG00000219481	NBPF1	1	cg02880315	3	49724254	23.5527755487395	4.84216155835484e-115
ENSG00000219481	NBPF1	1	cg02986733	6	41738046	-7.00059481669136	2.9716052605744e-12
ENSG00000219481	NBPF1	1	cg04254693	3	49727222	10.0721277488264	1.39018763944878e-23
ENSG00000219481	NBPF1	1	cg04581025	3	49727474	12.4493920816694	6.1223940056788e-35
ENSG00000219481	NBPF1	1	cg10210806	1	6514605	7.18013603084027	8.25021184061664e-13
ENSG00000219481	NBPF1	1	cg14478316	3	49727037	9.72497545676016	4.11768325865253e-22
ENSG00000219481	NBPF1	1	cg14873885	3	49726775	19.4927189351563	5.9736700817619e-81
ENSG00000219481	NBPF1	1	cg22290284	3	49726443	11.7167307942309	3.32995582136343e-31
ENSG00000219481	NBPF1	1	cg25036710	1	149228170	8.86890931115855	1.08851675209332e-18
ENSG00000186275	NBPF12	1	cg10397440	8	57359258	11.8159165193539	1.06882786699456e-31
ENSG00000186275	NBPF12	1	cg26789489	1	16941426	19.7637355915534	4.58951618168785e-83
ENSG00000142794	NBPF3	1	cg19638881	1	120395943	-11.3102384638872	3.19889461313073e-29
ENSG00000142794	NBPF3	1	cg20858577	6	30036985	-9.36941274301272	1.17990794151838e-20
ENSG00000158864	NDUFS2	1	cg08541612	1	2985720	6.96502858034169	3.81650076191261e-12
ENSG00000157191	NECAP2	1	cg00014168	1	6511878	-7.29031987374897	3.70149013951417e-13
ENSG00000157191	NECAP2	1	cg01800128	1	144815302	8.22184326881802	2.67293965339849e-16
ENSG00000157191	NECAP2	1	cg02880315	3	49724254	-9.03124887534122	2.57372555575676e-19
ENSG00000157191	NECAP2	1	cg10210806	1	6514605	-8.37886923511299	7.28757665426829e-17
ENSG00000157191	NECAP2	1	cg14873885	3	49726775	-9.6048564962672	1.29601002674008e-21
ENSG00000157191	NECAP2	1	cg16672535	1	6510652	-9.76205874868085	2.88240931292233e-22
ENSG00000157191	NECAP2	1	cg25036710	1	149228170	-8.99779779161214	3.47120864096171e-19
ENSG00000162711	NLRP3	1	cg00121209	19	54606151	-7.69270256233814	1.79857278405857e-14
ENSG00000162711	NLRP3	1	cg14889079	19	54606153	-20.5702867470132	1.69260150491406e-89
ENSG00000162711	NLRP3	1	cg19219834	19	54610241	-11.006848664411	8.76074874000105e-28
ENSG00000131697	NPHP4	1	cg13925809	9	84646696	6.94461317252073	4.40362960616112e-12
ENSG00000131697	NPHP4	1	cg13928313	7	2802073	13.1549249231167	9.87671435143062e-39
ENSG00000162600	OMA1	1	cg17179875	1	116961404	24.7660245366821	3.50494022147776e-126
ENSG00000117115	PADI2	1	cg10210806	1	6514605	6.93401702930961	4.7424025560632e-12
ENSG00000117115	PADI2	1	cg16672535	1	6510652	10.0536476906106	1.66964175296758e-23
ENSG00000143799	PARP1	1	cg21787323	11	85338252	7.91472746839563	3.17574289747662e-15
ENSG00000143799	PARP1	1	cg27539482	13	111589090	-34.0707993670886	7.28064048374539e-224
ENSG00000204138	PHACTR4	1	cg13071609	3	14336117	12.3465779496038	2.10685617387118e-34
ENSG00000204138	PHACTR4	1	cg15399122	6	39012368	-10.6222841669979	5.1597492745139e-26
ENSG00000135845	PIGC	1	cg03745912	10	120924721	26.5588419141245	2.19683361939939e-143
ENSG00000143398	PIP5K1A	1	cg25754926	6	7986689	24.3206708114228	4.81167963331319e-122
ENSG00000116711	PLA2G4A	1	cg15852841	15	55805949	7.9175845182035	3.10472658097265e-15
ENSG00000149527	PLCH2	1	cg10374297	7	158066523	7.91266222714512	3.2280715654819e-15
ENSG00000187583	PLEKHN1	1	cg01145430	15	45670526	-23.8873032625146	4.51873959499009e-118
ENSG00000187583	PLEKHN1	1	cg05880817	15	49913015	-8.34966431393951	9.29640231499451e-17
ENSG00000187583	PLEKHN1	1	cg07742842	5	118416915	8.01658750124536	1.41128004941518e-15
ENSG00000085998	POMGNT1	1	cg20693607	3	184319566	10.2295188785793	2.88434381220246e-24
ENSG00000171960	PPIH	1	cg19693031	1	145441552	7.25191023030978	4.90099467340559e-13
ENSG00000077157	PPP1R12B	1	cg19743820	5	85913790	-17.5829230524943	9.64375053922617e-67
ENSG00000077157	PPP1R12B	1	cg25914270	5	85913777	-11.7298349730799	2.86717237426121e-31
ENSG00000117592	PRDX6	1	cg13849727	9	15810627	-7.17645627377629	8.47235417585375e-13
ENSG00000131791	PRKAB2	1	cg02953927	15	44038812	-19.635801698544	4.60143949854029e-82
ENSG00000067606	PRKCZ	1	cg12132029	19	11616515	7.88592278418944	3.98734714842856e-15
ENSG00000067606	PRKCZ	1	cg18313694	15	45480185	7.21196541732176	6.55273287741171e-13
ENSG00000067606	PRKCZ	1	cg20148285	1	24018143	18.5816123832535	5.09695245760541e-74
ENSG00000067606	PRKCZ	1	cg20151207	17	57696971	9.72551910671344	4.09624649437372e-22
ENSG00000134247	PTGFRN	1	cg08049136	19	10765744	-15.133971256243	2.27309550321267e-50
ENSG00000134247	PTGFRN	1	cg08053686	4	6223581	-8.7602291975142	2.81932499230621e-18
ENSG00000143851	PTPN7	1	cg14097425	9	21559551	7.91181969470894	3.24966257572282e-15
ENSG00000169972	PUSL1	1	cg00016238	1	244374065	-13.1813094923879	7.06498804902504e-39
ENSG00000169972	PUSL1	1	cg01029838	7	77428748	14.8877072512458	7.65376440679668e-49
ENSG00000169972	PUSL1	1	cg16196077	10	64028521	-22.2686115715314	1.03080945190254e-103
ENSG00000152061	RABGAP1L	1	cg07792719	16	53455291	8.27038301192133	1.79304629931992e-16
ENSG00000162444	RBP7	1	cg05396182	1	93544739	-8.41075018863249	5.58171196279492e-17
ENSG00000142599	RERE	1	cg12525736	1	228269915	9.09359951786612	1.46959223936742e-19
ENSG00000187010	RHD	1	cg24708006	6	85483055	8.47787032722217	3.17385026167459e-17
ENSG00000143622	RIT1	1	cg06200634	11	118966695	6.88355896453169	6.7397005216895e-12
ENSG00000121848	RNF115	1	cg03593595	3	132977031	-6.97351460861908	3.59569722647399e-12
ENSG00000121848	RNF115	1	cg27631248	1	220267790	6.89843879768136	6.07765384278233e-12
ENSG00000168159	RNF187	1	cg05079548	7	128337621	-9.46681293000584	4.76127151408391e-21
ENSG00000168159	RNF187	1	cg05583632	22	25081868	12.000284545298	1.26290571221949e-32
ENSG00000168159	RNF187	1	cg07598549	7	96635868	7.49341662494855	8.1982148856867606e-14
ENSG00000168159	RNF187	1	cg13957045	11	124506378	-7.34230713478731	2.52587444846096e-13
ENSG00000168159	RNF187	1	cg16588073	1	156647247	7.42607125169923	1.35728708456033e-13
ENSG00000187147	RNF220	1	cg01017464	18	47018095	-7.39014979694389	1.77296155754555e-13
ENSG00000187147	RNF220	1	cg04388657	9	127623377	-8.40246845310978	5.98263705790229e-17
ENSG00000187147	RNF220	1	cg04761231	9	127623571	-7.83427384818863	5.98495577695217e-15
ENSG00000235477	RP11-122G18.5	1	cg06174877	2	175972440	-7.29672101126623	3.53184256716987e-13
ENSG00000259834	RP11-284N8.3	1	cg15830792	10	64893214	14.0188990509432	1.24021401835052e-43
ENSG00000269996	RP11-343N15.5	1	cg00454997	1	26222103	-7.11213272095786	1.34528002116895e-12
ENSG00000269996	RP11-343N15.5	1	cg00646200	1	148855367	-40.771956625901304	1.12304800701472e-304
ENSG00000269996	RP11-343N15.5	1	cg02470959	12	132196036	-8.67928526633151	5.68679029068763e-18
ENSG00000269996	RP11-343N15.5	1	cg03398156	2	220154779	-6.79991774173654	1.20049662445701e-11
ENSG00000269996	RP11-343N15.5	1	cg03593595	3	132977031	8.81524232360601	1.74392528548698e-18
ENSG00000269996	RP11-343N15.5	1	cg04935289	1	143767881	8.74614008851453	3.18695453968647e-18
ENSG00000269996	RP11-343N15.5	1	cg13574121	1	148855760	-8.01973190516596	1.37617133650079e-15
ENSG00000269996	RP11-343N15.5	1	cg15404665	19	4724679	-12.4636310521663	5.15548983084694e-35
ENSG00000269996	RP11-343N15.5	1	cg20056341	15	49557625	-9.16133506602284	7.96224622481408e-20
ENSG00000269996	RP11-343N15.5	1	cg26681183	1	148855372	-13.9731309492073	2.29172314064512e-43
ENSG00000260698	RP11-439E19.9	1	cg04279411	1	230645569	7.97902122859736	1.90550498460387e-15
ENSG00000224870	RP4-758J18.2	1	cg16196077	10	64028521	-15.5090486515207	9.72778757049814e-53
ENSG00000226029	RP4-798A10.2	1	cg00014168	1	6511878	11.700621721532	4.0015942756909e-31
ENSG00000226029	RP4-798A10.2	1	cg01800128	1	144815302	-14.4436024873442	3.81739690845042e-46
ENSG00000226029	RP4-798A10.2	1	cg02880315	3	49724254	15.8203385587358	9.62814891192163e-55
ENSG00000226029	RP4-798A10.2	1	cg02986733	6	41738046	-7.48073036816925	9.01792645417423e-14
ENSG00000226029	RP4-798A10.2	1	cg10210806	1	6514605	9.91112731757408	6.78489253784482e-23
ENSG00000226029	RP4-798A10.2	1	cg14873885	3	49726775	10.2739130829094	1.84334849324883e-24
ENSG00000226029	RP4-798A10.2	1	cg25036710	1	149228170	7.79428299018574	8.18235115376577e-15
ENSG00000142937	RPS8	1	cg18526140	14	106444894	-7.78071093011546	9.09542778468046e-15
ENSG00000142937	RPS8	1	cg20693607	3	184319566	-7.18010525617239	8.2520457387985e-13
ENSG00000143653	SCCPDH	1	cg23496400	2	17721775	-10.0039716276869	2.72762878787442e-23
ENSG00000163156	SCNM1	1	cg15404665	19	4724679	-9.19186747812837	6.03192695295529e-20
ENSG00000162572	SCNN1D	1	cg16196077	10	64028521	-16.181281225616	4.12816362540131e-57
ENSG00000162572	SCNN1D	1	cg25623347	1	116943772	9.14825330328795	8.96568521995766e-20
ENSG00000078808	SDF4	1	cg04865480	2	173421027	7.55062596438721	5.32429484663152e-14
ENSG00000078808	SDF4	1	cg25623347	1	116943772	18.37832221133	1.64442326661453e-72
ENSG00000143252	SDHC	1	cg06174877	2	175972440	-7.45601021908557	1.08533515514985e-13
ENSG00000143252	SDHC	1	cg18430411	8	144873183	9.65636058762741	7.93972412080967e-22
ENSG00000143434	SEMA6C	1	cg25754926	6	7986689	6.84873048281591	8.57809466306592e-12
ENSG00000142669	SH3BGRL3	1	cg00926192	17	42297085	7.44941156047415	1.14024543099788e-13
ENSG00000142669	SH3BGRL3	1	cg03487637	11	45940039	10.2344263219302	2.74531224664669e-24
ENSG00000142669	SH3BGRL3	1	cg13456653	7	157130065	7.02620272608668	2.47983768457453e-12
ENSG00000142669	SH3BGRL3	1	cg19403339	2	183580841	10.0940808044498	1.11788365131482e-23
ENSG00000142669	SH3BGRL3	1	cg21879320	1	185125698	10.3578303294287	7.86905569884208e-25
ENSG00000157933	SKI	1	cg12132029	19	11616515	-7.35854216080263	2.24055610583046e-13
ENSG00000157933	SKI	1	cg18313694	15	45480185	-7.78511110392202	8.78892222526057e-15
ENSG00000085491	SLC25A24	1	cg01838916	5	85577056	20.7804809354913	3.29522178650147e-91
ENSG00000085491	SLC25A24	1	cg09032863	1	44412568	-9.96096546844766	4.16419501670418e-23
ENSG00000215790	SLC35E2	1	cg12657025	1	234878498	-13.464803279316	1.85825647561421e-40
ENSG00000215790	SLC35E2	1	cg13474004	8	1783980	10.4117235658406	4.53971694427458e-25
ENSG00000215790	SLC35E2	1	cg17743732	2	238705221	7.4441081057774	1.18634953196129e-13
ENSG00000215790	SLC35E2	1	cg17746819	1	100715586	16.8755477124979	8.53358908825441e-62
ENSG00000189339	SLC35E2B	1	cg13474004	8	1783980	6.89758045993793	6.11404656180204e-12
ENSG00000189339	SLC35E2B	1	cg16196077	10	64028521	17.54444655155	1.81044473686652e-66
ENSG00000143570	SLC39A1	1	cg07567777	19	51524441	-7.27585286889907	4.1149462799621e-13
ENSG00000163866	SMIM12	1	cg12282830	22	29784441	-6.9361439864975	4.67241181580368e-12
ENSG00000010072	SPRTN	1	cg08029105	4	65506268	-7.72437793372833	1.40838256750051e-14
ENSG00000160075	SSU72	1	cg01226742	8	37699923	-7.67438024915237	2.07097749428158e-14
ENSG00000160075	SSU72	1	cg02250400	8	37698620	-7.31743382503993	3.03358309630858e-13
ENSG00000160075	SSU72	1	cg05001580	19	50193857	-7.13969902143228	1.10398385940418e-12
ENSG00000160075	SSU72	1	cg05552035	8	37699239	-8.08021783759875	8.46120253273007e-16
ENSG00000160075	SSU72	1	cg12424646	8	37699507	-7.88072995362685	4.15399902156367e-15
ENSG00000160075	SSU72	1	cg12869334	8	37699360	-7.96370753619052	2.15278438225211e-15
ENSG00000160075	SSU72	1	cg13069100	1	155035008	-7.58451565247174	4.11703230664584e-14
ENSG00000160075	SSU72	1	cg16196077	10	64028521	26.9726605240098	1.7809632480917e-147
ENSG00000160075	SSU72	1	cg19538614	19	50194205	-6.8170785046817	1.06697658637574e-11
ENSG00000160075	SSU72	1	cg20727114	19	50194120	-8.15941508687803	4.45235932170635e-16
ENSG00000160075	SSU72	1	cg23245289	8	37698900	-6.87808742502828	7.0005123992097e-12
ENSG00000160075	SSU72	1	cg26629969	19	51069496	7.37363482440601	2.00385300788391e-13
ENSG00000143858	SYT2	1	cg19743820	5	85913790	-17.5830795019017	9.61906118330969e-67
ENSG00000143858	SYT2	1	cg25914270	5	85913777	-11.7299434166	2.86362235825428e-31
ENSG00000055070	SZRD1	1	cg00014168	1	6511878	-10.3250623615938	1.09801946362237e-24
ENSG00000055070	SZRD1	1	cg01800128	1	144815302	12.0610345402424	6.20664690840461e-33
ENSG00000055070	SZRD1	1	cg02880315	3	49724254	-9.30790054589818	2.08347673925719e-20
ENSG00000055070	SZRD1	1	cg10210806	1	6514605	-14.214047728226	8.86548513970035e-45
ENSG00000055070	SZRD1	1	cg14873885	3	49726775	-9.41795085153498	7.51480479496065e-21
ENSG00000055070	SZRD1	1	cg16672535	1	6510652	-8.88291727306708	9.62088917833174e-19
ENSG00000055070	SZRD1	1	cg22290284	3	49726443	-6.88924404580109	6.47880333426204e-12
ENSG00000055070	SZRD1	1	cg25036710	1	149228170	-7.17208183561407	8.74408279839205e-13
ENSG00000162367	TAL1	1	cg00977256	18	77793479	6.80237834549739	1.18039178017338e-11
ENSG00000162367	TAL1	1	cg00999644	16	20817639	13.0236029868682	5.18644328513783e-38
ENSG00000162367	TAL1	1	cg02939078	20	61489595	9.26548237388587	3.0774364773022e-20
ENSG00000169962	TAS1R3	1	cg00974835	14	74960278	7.33970719428361	2.57476836544069e-13
ENSG00000169962	TAS1R3	1	cg03686870	4	103682143	-8.0961057825489	7.44214097078264e-16
ENSG00000169962	TAS1R3	1	cg16196077	10	64028521	15.3863156696831	5.87076780458153e-52
ENSG00000169962	TAS1R3	1	cg25623347	1	116943772	-10.3658264987486	7.25355112982278e-25
ENSG00000116957	TBCE	1	cg25579656	19	54290523	13.0100867214686	6.14652369858479e-38
ENSG00000041988	THAP3	1	cg11078326	1	104616118	-7.30163960765942	3.4066984425246e-13
ENSG00000169231	THBS3	1	cg03489965	15	65368982	-7.99132116065643	1.72734456098528e-15
ENSG00000169231	THBS3	1	cg05790982	4	4861404	-21.6906971286865	8.91953443729822e-99
ENSG00000169231	THBS3	1	cg06200634	11	118966695	-8.9147348872827	7.26320691834466e-19
ENSG00000169231	THBS3	1	cg10619342	15	65369005	-8.001948388568	1.58670322482465e-15
ENSG00000143155	TIPRL	1	cg25149069	1	233464229	8.70511892605224	4.54885434863848e-18
ENSG00000162542	TMCO4	1	cg18750937	12	67662516	11.1136731721047	2.75741383969864e-28
ENSG00000162542	TMCO4	1	cg18753664	12	124515061	33.3958727494959	3.82625721855452e-216
ENSG00000162542	TMCO4	1	cg18753962	13	45995831	18.3510402096639	2.61471851323935e-72
ENSG00000162542	TMCO4	1	cg18756771	10	112261994	13.2119803067619	4.78234907523073e-39
ENSG00000183726	TMEM50A	1	cg24708006	6	85483055	8.53873947343343	1.8952113372989e-17
ENSG00000171729	TMEM51	1	cg11158179	1	61543011	-7.07178360830127	1.79436100023661e-12
ENSG00000126106	TMEM53	1	cg01017464	18	47018095	-7.90139921250344	3.52875279237407e-15
ENSG00000126106	TMEM53	1	cg04761231	9	127623571	-7.09483794317145	1.52235075692108e-12
ENSG00000174529	TMEM81	1	cg13419330	3	10247487	-6.86487933104785	7.67155696528192e-12
ENSG00000157873	TNFRSF14	1	cg05998672	11	986408	-10.5591945446575	9.94122101682679e-26
ENSG00000186891	TNFRSF18	1	cg00016238	1	244374065	-10.898875616812	2.7887809512949e-27
ENSG00000186891	TNFRSF18	1	cg01029838	7	77428748	12.3016591527262	3.60448920174686e-34
ENSG00000186891	TNFRSF18	1	cg16196077	10	64028521	-15.9675453867521	1.0555961670441e-55
ENSG00000186891	TNFRSF18	1	cg25391673	1	153962013	7.19838595804257	7.23027424226534e-13
ENSG00000186891	TNFRSF18	1	cg25623347	1	116943772	16.6830657312025	1.76593668381375e-60
ENSG00000186827	TNFRSF4	1	cg00016238	1	244374065	-12.5203313885175	2.59556181676367e-35
ENSG00000186827	TNFRSF4	1	cg01029838	7	77428748	13.5068184167489	1.07734772464764e-40
ENSG00000186827	TNFRSF4	1	cg16196077	10	64028521	-15.2169465651617	6.87129487278338e-51
ENSG00000186827	TNFRSF4	1	cg25623347	1	116943772	9.38818646203273	9.91237910357677e-21
ENSG00000186283	TOR3A	1	cg04525335	16	85877183	-21.5428955546891	1.57268288678491e-97
ENSG00000143549	TPM3	1	cg25748542	3	119393058	-6.84117857652806	9.03728930029132e-12
ENSG00000158109	TPRG1L	1	cg20075270	10	46168220	-9.71945728771699	4.34165504179594e-22
ENSG00000154370	TRIM11	1	cg05583632	22	25081868	8.553056621652	1.67790921481617e-17
ENSG00000215912	TTC34	1	cg05998672	11	986408	-18.3720075756582	1.83085611681826e-72
ENSG00000215912	TTC34	1	cg06780875	7	116331685	-12.9042434851289	2.31112255906375e-37
ENSG00000085831	TTC39A	1	cg27110877	5	77940704	9.14943929922585	8.86978284171838e-20
ENSG00000130939	UBE4B	1	cg05396182	1	93544739	-7.13714875920757	1.12439296746619e-12
ENSG00000126088	UROD	1	cg20693607	3	184319566	-7.92779553981347	2.8634700492018e-15
ENSG00000116213	WRAP73	1	cg10434075	17	55038112	-12.4424063169658	6.66066170346632e-35
ENSG00000116213	WRAP73	1	cg20075270	10	46168220	-18.9062164540817	1.8601650708032e-76
ENSG00000134684	YARS	1	cg03035248	3	50540699	14.693236243284	1.18634709764571e-47
ENSG00000134684	YARS	1	cg27618483	2	155433424	13.2547928731008	2.77003870355994e-39
ENSG00000196449	YRDC	1	cg14029663	14	50582909	-7.76686765137853	1.01299840065517e-14
ENSG00000163374	YY1AP1	1	cg03489965	15	65368982	7.75647874236224	1.09816688905372e-14
ENSG00000163374	YY1AP1	1	cg05790982	4	4861404	10.4190765601248	4.21061550199813e-25
ENSG00000163374	YY1AP1	1	cg06200634	11	118966695	9.944130898675	4.91197811632486e-23
ENSG00000163374	YY1AP1	1	cg10619342	15	65369005	7.74325393636295	1.21684274607376e-14
ENSG00000185278	ZBTB37	1	cg13849727	9	15810627	-19.7087929900298	1.23698498975216e-82
ENSG00000187815	ZFP69	1	cg02302089	7	23401203	7.5585085944391	5.01566074469017e-14
ENSG00000187815	ZFP69	1	cg15405364	13	113725440	8.5255961704317	2.11903082949486e-17
ENSG00000196418	ZNF124	1	cg00550498	19	12251208	-8.66813884443912	6.26067495405409e-18
ENSG00000196418	ZNF124	1	cg21969884	6	83007744	-8.8495565533452	1.29057529530427e-18
ENSG00000196418	ZNF124	1	cg27348863	6	169484769	-7.57672924709218	4.36802048775556e-14
ENSG00000160094	ZNF362	1	cg00709966	7	27253143	7.68330000345965	1.93364078893633e-14
ENSG00000160094	ZNF362	1	cg02063817	7	27253521	8.85732950500292	1.20531501053772e-18
ENSG00000160094	ZNF362	1	cg05756918	7	27253707	8.85708291698154	1.2079322958426e-18
ENSG00000160094	ZNF362	1	cg12187687	7	27253834	8.05096548669205	1.07097399092524e-15
ENSG00000160094	ZNF362	1	cg18180846	10	102990855	8.2694398510094	1.80704877366058e-16
ENSG00000125945	ZNF436	1	cg05192452	5	71852759	-6.87181011896716	7.31193276699012e-12
ENSG00000125945	ZNF436	1	cg05732883	10	100150928	-7.67439132138896	2.0708012040065e-14
ENSG00000125945	ZNF436	1	cg11294761	17	80275530	-6.96463146769484	3.82715291941012e-12
ENSG00000125945	ZNF436	1	cg14661148	5	71852862	-8.21779954750353	2.76306559616669e-16
ENSG00000188295	ZNF669	1	cg00550498	19	12251208	11.665059801914	5.99829023374406e-31
ENSG00000188295	ZNF669	1	cg21969884	6	83007744	7.35709519687207	2.26464300039123e-13
ENSG00000188295	ZNF669	1	cg27348863	6	169484769	15.5141762010636	9.02152537379166e-53
ENSG00000176083	ZNF683	1	cg08108911	1	157015297	-7.81534215489406	6.94125968009505e-15
ENSG00000176083	ZNF683	1	cg20449648	1	226496944	-11.6545565296875	6.75856377003652e-31
ENSG00000176083	ZNF683	1	cg21879320	1	185125698	-10.8233784742995	6.22737226127278e-27
ENSG00000236255	AC009404.2	2	cg12284736	1	80603921	-6.95555771022662	4.07864969616521e-12
ENSG00000235192	AC009495.2	2	cg14011387	9	134228590	-11.1808714503888	1.32554561814184e-28
ENSG00000186235	AC016757.3	2	cg01134436	17	81009848	9.16739165241299	7.53609958250942e-20
ENSG00000186235	AC016757.3	2	cg11594217	2	10443800	7.63965399393812	2.70321598476729e-14
ENSG00000186235	AC016757.3	2	cg13357714	5	155807613	-10.2212966468504	3.13309122276561e-24
ENSG00000186235	AC016757.3	2	cg17784811	6	31079617	10.4334280515957	3.63490522241526e-25
ENSG00000237940	AC093642.3	2	cg12499542	12	53808156	11.498897279742	3.91643007454159e-30
ENSG00000237940	AC093642.3	2	cg23187101	19	1812290	13.0632998418547	3.14656754128792e-38
ENSG00000226321	AC104809.3	2	cg26822986	18	21199691	8.72433160525874	3.85135005305415e-18
ENSG00000144218	AFF3	2	cg14165692	2	111367744	10.6187286445736	5.35453191517698e-26
ENSG00000173209	AHSA2	2	cg02765363	17	80200741	-7.26973934312255	4.30300636174311e-13
ENSG00000173209	AHSA2	2	cg18772573	17	71257980	-6.78664184396342	1.31489737798901e-11
ENSG00000173209	AHSA2	2	cg19393755	17	71258101	-7.08898694264998	1.58728487492263e-12
ENSG00000173209	AHSA2	2	cg26023268	17	71258215	-7.27503506572712	4.13962719852552e-13
ENSG00000153107	ANAPC1	2	cg23229568	2	234663729	-10.0866920833161	1.20304909692597e-23
ENSG00000065802	ASB1	2	cg01134436	17	81009848	-12.6220100920054	7.52796956170125e-36
ENSG00000065802	ASB1	2	cg17784811	6	31079617	14.9735003143897	2.26115802763954e-49
ENSG00000168397	ATG4B	2	cg17769387	4	84031278	-14.8290690518521	1.75491856636924e-48
ENSG00000138085	ATRAID	2	cg20744217	11	67211017	-9.72969389995141	3.93526993600835e-22
ENSG00000138085	ATRAID	2	cg22608170	18	48086411	-7.55032221369539	5.33655429122405e-14
ENSG00000074582	BCS1L	2	cg13348944	11	118047121	8.29137545282145	1.50766068308535e-16
ENSG00000074582	BCS1L	2	cg14485185	11	118051260	12.1294252838741	2.77863164474607e-33
ENSG00000168887	C2orf68	2	cg02464912	14	64319543	8.54525723492641	1.79304257732062e-17
ENSG00000168887	C2orf68	2	cg08539067	3	49395985	9.00072201042241	3.38175048747195e-19
ENSG00000084774	CAD	2	cg03929741	13	107187681	6.82888547978804	9.83679693161572e-12
ENSG00000084774	CAD	2	cg20744217	11	67211017	10.0754248825069	1.34544563852281e-23
ENSG00000084774	CAD	2	cg22608170	18	48086411	7.75456848012508	1.11457713920176e-14
ENSG00000136710	CCDC115	2	cg22114309	1	895869	-18.8602723447984	4.13739371869408e-76
ENSG00000136710	CCDC115	2	cg22748722	6	33135868	18.9820294637295	4.95606501202983e-77
ENSG00000153563	CD8A	2	cg05746288	18	48405273	-10.8730146148255	3.67432381463755e-27
ENSG00000153563	CD8A	2	cg09409356	1	163468474	9.24272799974089	3.79107147735246e-20
ENSG00000172116	CD8B	2	cg05746288	18	48405273	11.1648767973343	1.57859943313676e-28
ENSG00000172116	CD8B	2	cg11704396	3	48723701	7.29725067039382	3.51815235294497e-13
ENSG00000172116	CD8B	2	cg22448292	15	90234075	7.06025010329376	1.9478033099008e-12
ENSG00000144354	CDCA7	2	cg00672093	2	139654844	7.3238119910486	2.89456216938441e-13
ENSG00000144354	CDCA7	2	cg01148073	16	82126267	6.87428115123417	7.18775551297843e-12
ENSG00000144354	CDCA7	2	cg01185573	3	135432551	7.35873179278113	2.23741811456335e-13
ENSG00000144354	CDCA7	2	cg01311802	6	29430435	6.79770195360742	1.2188880333707e-11
ENSG00000144354	CDCA7	2	cg01702210	14	58064926	8.22126263500376	2.68570023736659e-16
ENSG00000144354	CDCA7	2	cg01890568	17	31437649	7.6741114028275	2.07526255575086e-14
ENSG00000144354	CDCA7	2	cg02204261	4	134787901	7.01370429015974	2.70896547950538e-12
ENSG00000144354	CDCA7	2	cg02624836	2	67312537	7.50660568768793	7.42372184462863e-14
ENSG00000144354	CDCA7	2	cg03078733	17	14822587	7.60826788737699	3.43583744761404e-14
ENSG00000144354	CDCA7	2	cg03625515	16	18157108	8.45853786506035	3.73588065154318e-17
ENSG00000144354	CDCA7	2	cg03804083	3	168891416	7.76674848198281	1.01393746898477e-14
ENSG00000144354	CDCA7	2	cg04157272	2	68017838	7.432344485586	1.29525334000352e-13
ENSG00000144354	CDCA7	2	cg04226903	4	187544998	7.67961795497102	1.9892113174677e-14
ENSG00000144354	CDCA7	2	cg04307853	17	6021418	7.70595877340599	1.62379018741656e-14
ENSG00000144354	CDCA7	2	cg05121182	3	123812381	7.93565185489552	2.69050785142847e-15
ENSG00000144354	CDCA7	2	cg05399607	7	34874533	6.92771194948159	4.95597722299709e-12
ENSG00000144354	CDCA7	2	cg05614028	18	44785758	7.04991467304655	2.09619779126382e-12
ENSG00000144354	CDCA7	2	cg05775492	16	86258717	8.09781109534938	7.34022914894032e-16
ENSG00000144354	CDCA7	2	cg05851730	5	45204945	7.52560087776175	6.43319003348867e-14
ENSG00000144354	CDCA7	2	cg06943845	2	6507982	8.31547823658746	1.23492224477605e-16
ENSG00000144354	CDCA7	2	cg07339864	7	70561125	7.67362101293039	2.08310121798811e-14
ENSG00000144354	CDCA7	2	cg07450292	3	76419070	6.85171306298021	8.40310791167861e-12
ENSG00000144354	CDCA7	2	cg08442713	5	117822219	6.91439519847587	5.43852746401226e-12
ENSG00000144354	CDCA7	2	cg08493762	21	42222713	9.02952850760572	2.61369484297448e-19
ENSG00000144354	CDCA7	2	cg08942929	15	29825426	7.33996584941649	2.56986279013113e-13
ENSG00000144354	CDCA7	2	cg09196534	7	77975971	7.83035169008503	6.17177794708375e-15
ENSG00000144354	CDCA7	2	cg09323806	7	141617279	6.93568755516822	4.6873454957271e-12
ENSG00000144354	CDCA7	2	cg09959790	13	59616937	6.89226034035532	6.34442799483641e-12
ENSG00000144354	CDCA7	2	cg10153214	16	71571146	6.82895899130313	9.83181589172062e-12
ENSG00000144354	CDCA7	2	cg10310168	1	4376380	7.5597526961454	4.96858496459742e-14
ENSG00000144354	CDCA7	2	cg10325509	10	24269469	7.07431778907951	1.76227061032013e-12
ENSG00000144354	CDCA7	2	cg10453777	13	62245229	7.13109029929151	1.17437402126912e-12
ENSG00000144354	CDCA7	2	cg10907582	14	96411400	6.84109306618106	9.04262429631325e-12
ENSG00000144354	CDCA7	2	cg10962805	2	125672110	7.4048257905823	1.58986116865896e-13
ENSG00000144354	CDCA7	2	cg11005831	5	15928441	6.82016251591234	1.04457508509115e-11
ENSG00000144354	CDCA7	2	cg11388802	1	181577847	7.75632719167711	1.09946006346257e-14
ENSG00000144354	CDCA7	2	cg11751344	8	92622592	7.06435014328204	1.89183558121872e-12
ENSG00000144354	CDCA7	2	cg12045030	2	220865785	8.20414058129035	3.09022068090023e-16
ENSG00000144354	CDCA7	2	cg12101474	7	118427418	7.2946828018874	3.58501452891695e-13
ENSG00000144354	CDCA7	2	cg12324708	5	130329173	7.17332875055256	8.66576762618948e-13
ENSG00000144354	CDCA7	2	cg13005228	5	134987654	7.26094347161102	4.58847332741525e-13
ENSG00000144354	CDCA7	2	cg13298997	7	32038956	6.90528907502244	5.79472027230569e-12
ENSG00000144354	CDCA7	2	cg13471209	1	82165326	6.79692947263148	1.22536443092503e-11
ENSG00000144354	CDCA7	2	cg13593284	9	74761911	7.81408808662001	7.0096702704028e-15
ENSG00000144354	CDCA7	2	cg13797580	2	215494121	7.50137880801973	7.72164745973539e-14
ENSG00000144354	CDCA7	2	cg14014950	3	64125334	7.7921803762522	8.31765580865638e-15
ENSG00000144354	CDCA7	2	cg14444650	2	19406301	6.858302028908	8.02884574040449e-12
ENSG00000144354	CDCA7	2	cg14660328	11	79878290	8.77012690691399	2.5864379795161e-18
ENSG00000144354	CDCA7	2	cg14790000	5	127805611	7.01213153480236	2.7392302908707e-12
ENSG00000144354	CDCA7	2	cg15359390	2	79365892	7.08618036345378	1.61938931115206e-12
ENSG00000144354	CDCA7	2	cg15396204	1	107348393	7.03466382392879	2.33563237377282e-12
ENSG00000144354	CDCA7	2	cg15442888	4	175789139	6.95907842653813	3.97919822018162e-12
ENSG00000144354	CDCA7	2	cg15985891	1	66323190	7.2327373760252	5.63521114020676e-13
ENSG00000144354	CDCA7	2	cg16086730	5	9782142	7.57643984510794	4.37763361256451e-14
ENSG00000144354	CDCA7	2	cg16418228	3	54963186	7.022704336428	2.54198264617931e-12
ENSG00000144354	CDCA7	2	cg16531181	10	130185387	6.86837590442025	7.48801173457337e-12
ENSG00000144354	CDCA7	2	cg17144548	2	5679308	6.86727614386724	7.54527232999276e-12
ENSG00000144354	CDCA7	2	cg17346345	2	79743491	7.55153366650186	5.28782462320966e-14
ENSG00000144354	CDCA7	2	cg17689601	10	83651137	7.84927860881228	5.32026389122427e-15
ENSG00000144354	CDCA7	2	cg17804071	3	73596205	8.2640473124972	1.88920382472957e-16
ENSG00000144354	CDCA7	2	cg18387985	11	15350125	7.99770486224409	1.64145498450198e-15
ENSG00000144354	CDCA7	2	cg18484189	11	7984973	6.98078309479806	3.41657404136088e-12
ENSG00000144354	CDCA7	2	cg19631651	3	55005522	7.46660349348208	1.00257383253935e-13
ENSG00000144354	CDCA7	2	cg20316883	8	138493473	7.04144027605868	2.2261015788546e-12
ENSG00000144354	CDCA7	2	cg20480334	11	78799391	7.4377102939572	1.24441086393901e-13
ENSG00000144354	CDCA7	2	cg21150108	13	34750105	7.01069582700703	2.7671473341076e-12
ENSG00000144354	CDCA7	2	cg21395077	9	118687465	6.88422181394276	6.7087587759411e-12
ENSG00000144354	CDCA7	2	cg21935402	5	45262268	6.82384571710946	1.01842462974138e-11
ENSG00000144354	CDCA7	2	cg22379436	3	73789574	7.12870006983065	1.19468731400687e-12
ENSG00000144354	CDCA7	2	cg22791045	11	133403793	6.79089503517471	1.27713043399135e-11
ENSG00000144354	CDCA7	2	cg23411426	8	36955985	7.10999312300817	1.36603874140509e-12
ENSG00000144354	CDCA7	2	cg23715749	1	37413867	7.20997020050682	6.64822672547399e-13
ENSG00000144354	CDCA7	2	cg23912509	12	97957406	7.01913887845861	2.6068906394394e-12
ENSG00000144354	CDCA7	2	cg24270629	18	50823537	7.06168695131201	1.92800707279743e-12
ENSG00000144354	CDCA7	2	cg24294950	7	126752911	7.7173233160878	1.48733995592481e-14
ENSG00000144354	CDCA7	2	cg24346464	1	164872273	7.95868679458695	2.24054224326229e-15
ENSG00000144354	CDCA7	2	cg24520479	4	163906031	6.84282857252937	8.93494795521652e-12
ENSG00000144354	CDCA7	2	cg25879062	11	130386122	6.96366353083987	3.85323918638797e-12
ENSG00000144354	CDCA7	2	cg26094484	10	133318755	7.01278460254987	2.72662313071725e-12
ENSG00000144354	CDCA7	2	cg26837853	8	3970118	8.21234035162485	2.88950869120461e-16
ENSG00000144354	CDCA7	2	cg27574973	7	78218446	7.88790402893378	3.9255143323545e-15
ENSG00000115561	CHMP3	2	cg09409356	1	163468474	-11.1632883025823	1.60620932421187e-28
ENSG00000115561	CHMP3	2	cg20908556	4	124606293	-10.9458026908371	1.68818740182552e-27
ENSG00000123989	CHPF	2	cg02643343	15	81282487	-7.61000052432114	3.39073246459462e-14
ENSG00000144021	CIAO1	2	cg00788028	2	114049041	-8.96372998620711	4.70251183328722e-19
ENSG00000144524	COPS7B	2	cg01370599	3	116745421	-29.288739503044	3.6891100828691e-171
ENSG00000188011	CXXC11	2	cg03670816	5	53606426	-18.1861373846822	4.26061874852125e-71
ENSG00000188011	CXXC11	2	cg05527272	21	45079307	11.8543395343328	6.86584248209607e-32
ENSG00000188011	CXXC11	2	cg06824641	8	22298455	11.6648623584973	6.01176684966675e-31
ENSG00000188011	CXXC11	2	cg09887955	1	202129854	27.5940490852807	1.06076928859031e-153
ENSG00000188011	CXXC11	2	cg21956537	15	78369769	8.69710636001758	4.87534861641734e-18
ENSG00000188011	CXXC11	2	cg22532736	15	64126641	15.5632883707949	4.37791854194153e-53
ENSG00000188011	CXXC11	2	cg22957381	1	112532078	7.160860003851	9.48089397352289e-13
ENSG00000188011	CXXC11	2	cg24412117	10	93170566	16.9705973334033	1.89042351581186e-62
ENSG00000188011	CXXC11	2	cg25109252	1	36235538	9.71178647693413	4.67316026249188e-22
ENSG00000135929	CYP27A1	2	cg13348944	11	118047121	-7.23417376181564	5.57665093618965e-13
ENSG00000135929	CYP27A1	2	cg14485185	11	118051260	-11.6093486340564	1.12832894555825e-30
ENSG00000180902	D2HGDH	2	cg03670816	5	53606426	14.9728112734704	2.2834665550866e-49
ENSG00000180902	D2HGDH	2	cg05527272	21	45079307	-8.56841576057864	1.47210084120838e-17
ENSG00000180902	D2HGDH	2	cg09887955	1	202129854	-12.2581807673477	6.05108766040585e-34
ENSG00000180902	D2HGDH	2	cg22532736	15	64126641	-15.0530327211047	7.26142948443148e-50
ENSG00000180902	D2HGDH	2	cg24412117	10	93170566	-10.394432073017	5.41754888361727e-25
ENSG00000180902	D2HGDH	2	cg25109252	1	36235538	-8.17423140887714	3.94584839571889e-16
ENSG00000088205	DDX18	2	cg12284736	1	80603921	-12.8883384095951	2.81765777376825e-37
ENSG00000088205	DDX18	2	cg23943013	5	79551904	-8.80712110966254	1.87241322769248e-18
ENSG00000088205	DDX18	2	cg26574754	13	108870827	9.04523067359388	2.27052005042253e-19
ENSG00000119772	DNMT3A	2	cg01120308	11	85780971	8.41653985249247	5.31729397517253e-17
ENSG00000119772	DNMT3A	2	cg01834776	14	24898905	6.98613767565388	3.29024506706825e-12
ENSG00000119772	DNMT3A	2	cg01942927	1	212588536	7.62855070620752	2.94287647418993e-14
ENSG00000119772	DNMT3A	2	cg03560879	9	34380608	6.87814487678916	6.9977231148711e-12
ENSG00000119772	DNMT3A	2	cg12869229	12	56618373	6.9375614385657	4.62633193533059e-12
ENSG00000119772	DNMT3A	2	cg15995296	11	67210812	7.19589616931252	7.36175763020693e-13
ENSG00000119772	DNMT3A	2	cg22333846	19	17580131	7.13122526831117	1.1732371598597101e-12
ENSG00000168393	DTYMK	2	cg17769387	4	84031278	10.2481309991572	2.39124641459582e-24
ENSG00000188542	DUSP28	2	cg08817644	19	20150334	9.1440308938027	9.3155156824796e-20
ENSG00000197872	FAM49A	2	cg11254532	1	61520399	-17.2323708820437	2.86749102440789e-64
ENSG00000163013	FBXO41	2	cg23020402	6	24666573	-8.79421442864812	2.09610562319874e-18
ENSG00000005436	GCFC2	2	cg03425731	12	8665044	35.8778217255389	6.04528938721486e-245
ENSG00000178295	GEN1	2	cg05000488	7	23749740	-21.7016244854276	7.20997226357457e-99
ENSG00000115486	GGCX	2	cg00607627	16	28995994	-8.38889993922974	6.70175545308452e-17
ENSG00000115486	GGCX	2	cg02464912	14	64319543	-12.2732842918491	5.05544210966881e-34
ENSG00000115486	GGCX	2	cg02650017	17	47301614	-10.9134229046391	2.38742447117952e-27
ENSG00000115486	GGCX	2	cg03699074	16	88849875	-7.97140094376785	2.02484020482557e-15
ENSG00000115486	GGCX	2	cg04514047	5	10562456	-8.52327719162406	2.16114372382426e-17
ENSG00000115486	GGCX	2	cg06703222	16	69598327	-8.95378737878058	5.13713958790626e-19
ENSG00000115486	GGCX	2	cg08539067	3	49395985	-12.9324480406798	1.62542045662148e-37
ENSG00000115486	GGCX	2	cg11102794	11	8285587	8.10645604957873	6.84438268066496e-16
ENSG00000115486	GGCX	2	cg18101225	4	15964913	-6.90410330057413	5.84275403154208e-12
ENSG00000115486	GGCX	2	cg24002003	15	101668143	-7.8084113557227	7.32773764329952e-15
ENSG00000115486	GGCX	2	cg24819835	4	15780011	-7.14891920639953	1.03318624338324e-12
ENSG00000186281	GPAT2	2	cg00788028	2	114049041	-7.81580578285013	6.91613514309056e-15
ENSG00000178623	GPR35	2	cg25577322	7	17338213	15.4055962865302	4.43012713945504e-52
ENSG00000068024	HDAC4	2	cg02058194	22	41215556	10.0468720414942	1.78548356951947e-23
ENSG00000144485	HES6	2	cg13357714	5	155807613	-10.0456127585201	1.80787437725048e-23
ENSG00000144485	HES6	2	cg17763188	8	6692148	-9.36305399006362	1.25154327085157e-20
ENSG00000150540	HNMT	2	cg22542120	4	133045158	-11.0115821244542	8.32512177540482e-28
ENSG00000150540	HNMT	2	cg25299176	17	1303341	-9.5788004702999	1.65905414960666e-21
ENSG00000163596	ICA1L	2	cg04090794	1	92099858	11.6721932735402	5.53100233231735e-31
ENSG00000132323	ILKAP	2	cg17763188	8	6692148	14.8141191596885	2.16737898424309e-48
ENSG00000136718	IMP4	2	cg22114309	1	895869	-18.8070095272022	1.04309865865849e-75
ENSG00000136718	IMP4	2	cg22748722	6	33135868	19.0266632107348	2.2702112826945e-77
ENSG00000168395	ING5	2	cg09887955	1	202129854	6.99984949733261	2.98726538068521e-12
ENSG00000168395	ING5	2	cg15964163	8	67837689	-8.01630909051857	1.41443083343178e-15
ENSG00000151689	INPP1	2	cg13357708	6	7986216	-8.75215904824142	3.02444149765942e-18
ENSG00000151689	INPP1	2	cg14570006	9	139760593	-10.41960893225	4.18772756676508e-25
ENSG00000125629	INSIG2	2	cg12284736	1	80603921	-9.2546408813547	3.3991414181826e-20
ENSG00000172059	KLF11	2	cg04130656	6	6606765	7.38207675146439	1.88236043095262e-13
ENSG00000157992	KRTCAP3	2	cg03929741	13	107187681	-11.6870672588491	4.66976869364621e-31
ENSG00000157992	KRTCAP3	2	cg20744217	11	67211017	-18.6072471716508	3.28153630879676e-74
ENSG00000157992	KRTCAP3	2	cg22608170	18	48086411	-13.1115793876753	1.71030310049689e-38
ENSG00000115919	KYNU	2	cg15021882	7	16542142	8.21613359902683	2.80106166554664e-16
ENSG00000232931	LINC00342	2	cg00788028	2	114049041	-13.0386211243915	4.29370548466483e-38
ENSG00000124831	LRRFIP1	2	cg12512271	3	178976891	9.34222237283473	1.51771956489575e-20
ENSG00000172005	MAL	2	cg00788028	2	114049041	-11.4579671693367	6.19380748795324e-30
ENSG00000172005	MAL	2	cg02973320	1	162467753	-8.29920111881873	1.41316067212209e-16
ENSG00000172005	MAL	2	cg24043887	11	695896	-6.92093865420549	5.19592228796682e-12
ENSG00000247626	MARS2	2	cg06799605	2	174146611	12.6102238075477	8.69345958796441e-36
ENSG00000168906	MAT2A	2	cg00607627	16	28995994	9.87167396559571	9.96951619261494e-23
ENSG00000168906	MAT2A	2	cg02464912	14	64319543	12.5461855798355	1.89636517543834e-35
ENSG00000168906	MAT2A	2	cg02650017	17	47301614	12.3796752423302	1.41678327863823e-34
ENSG00000168906	MAT2A	2	cg03699074	16	88849875	10.2109894586114	3.47512961663214e-24
ENSG00000168906	MAT2A	2	cg04514047	5	10562456	7.5069976031879	7.40184434475207e-14
ENSG00000168906	MAT2A	2	cg04718845	6	152623094	6.88497749152339	6.67365368388536e-12
ENSG00000168906	MAT2A	2	cg06703222	16	69598327	9.6626890698218	7.47453579439468e-22
ENSG00000168906	MAT2A	2	cg08539067	3	49395985	14.8489216945239	1.32552168696476e-48
ENSG00000168906	MAT2A	2	cg13287553	7	4784419	7.40057881677637	1.64084542865733e-13
ENSG00000168906	MAT2A	2	cg16462073	16	28995843	7.2220234730997	6.09147776260482e-13
ENSG00000168906	MAT2A	2	cg18101225	4	15964913	9.2366242480203	4.00887244366143e-20
ENSG00000168906	MAT2A	2	cg24002003	15	101668143	10.0982122086472	1.07289603617176e-23
ENSG00000168906	MAT2A	2	cg24819835	4	15780011	9.92432056867784	5.96369378028566e-23
ENSG00000124370	MCEE	2	cg06263740	8	12565344	15.0531789524963	7.24624438065831e-50
ENSG00000151690	MFSD6	2	cg03359468	8	26240463	-7.54019711782381	5.76147977143366e-14
ENSG00000151690	MFSD6	2	cg14570006	9	139760593	-33.2795359982642	8.03133405021606e-215
ENSG00000124383	MPHOSPH10	2	cg06263740	8	12565344	-9.25013169552119	3.5425398617224e-20
ENSG00000118242	MREG	2	cg05607577	6	43544120	7.79374393338594	8.21683183620076e-15
ENSG00000115364	MRPL19	2	cg03425731	12	8665044	-32.8564669856254	4.90005343233646e-210
ENSG00000116062	MSH6	2	cg19211853	13	79968216	7.04691857894221	2.14125155644509e-12
ENSG00000116062	MSH6	2	cg23944298	3	127248864	7.6265141858268	2.98904884082111e-14
ENSG00000122085	MTERFD2	2	cg05059749	12	132615613	14.6042476019355	4.11395454801138e-47
ENSG00000122085	MTERFD2	2	cg08612384	17	27228511	-46.1742651178072	0
ENSG00000173272	MZT2A	2	cg00677195	10	7661611	16.2106911607858	2.63497305835855e-57
ENSG00000173272	MZT2A	2	cg10997922	18	55470506	-10.1363368180141	7.33869107443821e-24
ENSG00000173272	MZT2A	2	cg24630195	5	2748369	-18.3760186266114	1.71013228436713e-72
ENSG00000152082	MZT2B	2	cg04324758	19	16436671	-8.41320531306659	5.46803675814418e-17
ENSG00000152082	MZT2B	2	cg08320164	19	18228740	10.268367941023	1.94956237329855e-24
ENSG00000152082	MZT2B	2	cg22114309	1	895869	35.407710718369	2.09528965261772e-239
ENSG00000152082	MZT2B	2	cg22748722	6	33135868	-22.202271564505	3.84656114200222e-103
ENSG00000152082	MZT2B	2	cg24385902	6	144617301	-10.5193680478253	1.5011370499943e-25
ENSG00000152082	MZT2B	2	cg27040976	13	19752478	-8.3286606585203	1.10698294189013e-16
ENSG00000138386	NAB1	2	cg14570006	9	139760593	-7.88171328218645	4.12192345045909e-15
ENSG00000124357	NAGK	2	cg00995689	3	75653319	-16.129367661596	9.10287589888516e-57
ENSG00000124357	NAGK	2	cg06263740	8	12565344	10.5321109939646	1.31589674179929e-25
ENSG00000091106	NLRC4	2	cg00322666	3	87994995	-8.24618123821626	2.18860265285694e-16
ENSG00000123609	NMI	2	cg06164187	2	242641258	-8.80792453209858	1.85929618376433e-18
ENSG00000115216	NRBP1	2	cg03929741	13	107187681	11.511931008961	3.38346942272332e-30
ENSG00000115216	NRBP1	2	cg20744217	11	67211017	18.1238765284382	1.21533908888524e-70
ENSG00000115216	NRBP1	2	cg22608170	18	48086411	12.7336021445491	1.91492994279231e-36
ENSG00000115687	PASK	2	cg05059749	12	132615613	14.3485481387811	1.41171745774418e-45
ENSG00000115687	PASK	2	cg08612384	17	27228511	-47.9530841750679	0
ENSG00000125618	PAX8	2	cg05313009	22	29469033	-7.28712217537503	3.78921106989026e-13
ENSG00000125618	PAX8	2	cg05725004	1	76082568	-8.92859247951737	6.42432860223346e-19
ENSG00000125618	PAX8	2	cg09260603	1	206809102	-14.647163798454	2.26035861096557e-47
ENSG00000125618	PAX8	2	cg20257372	17	1945152	-13.898240018311	6.23478026830419e-43
ENSG00000188389	PDCD1	2	cg01600100	12	96794307	6.99306020093944	3.13369595741052e-12
ENSG00000188389	PDCD1	2	cg03560660	16	22960289	-7.79667214444308	8.03123629997496e-15
ENSG00000188389	PDCD1	2	cg03670816	5	53606426	-20.2735842504162	4.16277748291609e-87
ENSG00000188389	PDCD1	2	cg05527272	21	45079307	11.5336600959125	2.65035664936462e-30
ENSG00000188389	PDCD1	2	cg06379589	16	88767124	6.82100149100799	1.03856115338529e-11
ENSG00000188389	PDCD1	2	cg06824641	8	22298455	10.2221670395213	3.10578394954403e-24
ENSG00000188389	PDCD1	2	cg08262505	5	32174500	-6.83252105050808	9.59339492490368e-12
ENSG00000188389	PDCD1	2	cg09887955	1	202129854	22.4706255005906	1.83456317649188e-105
ENSG00000188389	PDCD1	2	cg11712835	1	201509152	11.6056634150346	1.17637233628946e-30
ENSG00000188389	PDCD1	2	cg12110677	20	2781483	7.05857569574053	1.97112427386479e-12
ENSG00000188389	PDCD1	2	cg12499542	12	53808156	9.79701043371249	2.05711301108248e-22
ENSG00000188389	PDCD1	2	cg15959319	5	32174494	-11.8008055952934	1.27158118230979e-31
ENSG00000188389	PDCD1	2	cg20624980	19	50432627	14.7058592006039	9.93962812805605e-48
ENSG00000188389	PDCD1	2	cg21956537	15	78369769	7.5981403257515	3.71153853814318e-14
ENSG00000188389	PDCD1	2	cg22532736	15	64126641	13.9648666312382	2.55994326568749e-43
ENSG00000188389	PDCD1	2	cg22957381	1	112532078	7.00000219892835	2.98405034322244e-12
ENSG00000188389	PDCD1	2	cg23187101	19	1812290	9.32719151530068	1.74384944539908e-20
ENSG00000188389	PDCD1	2	cg24412117	10	93170566	14.1335440006053	2.64296363437126e-44
ENSG00000188389	PDCD1	2	cg25109252	1	36235538	8.61942893875793	9.51689106059907e-18
ENSG00000188389	PDCD1	2	cg26979473	7	137028389	9.1388428188065	9.76387583830555e-20
ENSG00000156973	PDE6D	2	cg01370599	3	116745421	-30.6033514436654	3.64903049707787e-185
ENSG00000143870	PDIA6	2	cg25804018	8	140716671	-9.17784015306552	6.85330211418483e-20
ENSG00000115425	PECR	2	cg05607577	6	43544120	16.116843744185	1.1012441780235e-56
ENSG00000163803	PLB1	2	cg04222728	7	138549665	-7.09270937525898	1.54566602129885e-12
ENSG00000163803	PLB1	2	cg23261319	2	182713409	-7.19446599421713	7.43834254818334e-13
ENSG00000163803	PLB1	2	cg24974982	22	46403316	-6.88080075558874	6.86996264708403e-12
ENSG00000163803	PLB1	2	cg27661394	4	4661952	-6.88775621182508	6.54610974850442e-12
ENSG00000116095	PLEKHA3	2	cg14011486	1	26737247	14.6359782518015	2.64259020378405e-47
ENSG00000116095	PLEKHA3	2	cg18634211	1	26737262	15.0292687349025	1.02014842526625e-49
ENSG00000115241	PPM1G	2	cg03929741	13	107187681	12.0603764219539	6.25470593164845e-33
ENSG00000115241	PPM1G	2	cg20744217	11	67211017	18.3964231126139	1.20849193884556e-72
ENSG00000115241	PPM1G	2	cg22608170	18	48086411	13.4439593069778	2.43394867136461e-40
ENSG00000180228	PRKRA	2	cg14011486	1	26737247	14.6597033676534	1.89695230001492e-47
ENSG00000180228	PRKRA	2	cg18634211	1	26737262	13.6025930125864	3.09165225011473e-41
ENSG00000144134	RABL2A	2	cg17019350	7	2649920	18.6178467086316	2.7348979231135e-74
ENSG00000144134	RABL2A	2	cg19565306	22	51222011	22.02884568196	1.18531454992078e-101
ENSG00000144134	RABL2A	2	cg22012975	22	51222043	23.1733749584138	1.20886084387277e-111
ENSG00000184898	RBM43	2	cg06164187	2	242641258	8.83051165488561	1.52548275750578e-18
ENSG00000155636	RBM45	2	cg12665724	11	43364829	-9.81407542087674	1.74402963196948e-22
ENSG00000155636	RBM45	2	cg20512924	13	22021376	8.00120704991983	1.59613682639767e-15
ENSG00000080345	RIF1	2	cg06164187	2	242641258	-9.69533601734353	5.47093001045648e-22
ENSG00000260804	RP11-566E18.3	2	cg05607577	6	43544120	12.7915568103624	9.36503764120344e-37
ENSG00000153574	RPIA	2	cg08581953	13	25593057	-8.46493548115807	3.53979457584154e-17
ENSG00000144580	RQCD1	2	cg13348944	11	118047121	8.03507995570468	1.21678084370023e-15
ENSG00000144580	RQCD1	2	cg14485185	11	118051260	11.3906760226159	1.31162875561398e-29
ENSG00000132330	SCLY	2	cg16319085	4	85076551	-8.0117768455482	1.46670806170336e-15
ENSG00000035115	SH3YL1	2	cg07031794	2	26568949	-17.8135563152771	2.15744378253524e-68
ENSG00000035115	SH3YL1	2	cg11347411	7	150020925	-50.411520223058	0
ENSG00000035115	SH3YL1	2	cg12354986	22	38142174	-14.4043799616436	6.55451229950593e-46
ENSG00000035115	SH3YL1	2	cg22324358	7	2583541	17.0804437989009	3.28208224663182e-63
ENSG00000035115	SH3YL1	2	cg24475146	1	154530781	-32.259198107492	2.43011176525354e-203
ENSG00000115084	SLC35F5	2	cg17019350	7	2649920	21.6188044944124	3.60908830472051e-98
ENSG00000115084	SLC35F5	2	cg19565306	22	51222011	13.4553175258382	2.10118568851769e-40
ENSG00000115084	SLC35F5	2	cg22012975	22	51222043	17.8706806731994	8.36303759041851e-69
ENSG00000196950	SLC39A10	2	cg19368679	12	120555201	-9.77828853929377	2.46484972243587e-22
ENSG00000196950	SLC39A10	2	cg19369556	16	82661725	-13.4875062115328	1.38439604396515e-40
ENSG00000138074	SLC5A6	2	cg20744217	11	67211017	7.19718598135711	7.29335343278597e-13
ENSG00000136699	SMPD4	2	cg04324758	19	16436671	-8.5398589264033	1.87726358561507e-17
ENSG00000136699	SMPD4	2	cg08320164	19	18228740	10.5377145148794	1.24179308925534e-25
ENSG00000136699	SMPD4	2	cg22114309	1	895869	37.5617743884627	4.32798231641156e-265
ENSG00000136699	SMPD4	2	cg22748722	6	33135868	-23.8093926424528	2.30976953033821e-117
ENSG00000136699	SMPD4	2	cg24385902	6	144617301	-10.5643602699244	9.42277620871743e-26
ENSG00000136699	SMPD4	2	cg27040976	13	19752478	-8.46706540008566	3.47679417420037e-17
ENSG00000162804	SNED1	2	cg05059749	12	132615613	7.17918388029388	8.30713736355551e-13
ENSG00000162804	SNED1	2	cg08612384	17	27228511	-14.3861028424328	8.42842605667624e-46
ENSG00000079263	SP140	2	cg14658067	7	1273394	6.88679940253106	6.589755417356e-12
ENSG00000079263	SP140	2	cg18745131	7	1269963	7.35478742329488	2.30358692814021e-13
ENSG00000198369	SPRED2	2	cg08951638	5	141706213	-7.4555967846043	1.08869782775642e-13
ENSG00000163482	STK36	2	cg13348944	11	118047121	7.69451105774233	1.77367964464381e-14
ENSG00000163482	STK36	2	cg14485185	11	118051260	10.9503452236938	1.60795110241844e-27
ENSG00000135956	TMEM127	2	cg00788028	2	114049041	-12.7635392782462	1.32387489983598e-36
ENSG00000168890	TMEM150A	2	cg00522451	2	113464048	8.33723415111399	1.0308871713494e-16
ENSG00000168890	TMEM150A	2	cg00607627	16	28995994	13.6863883094971	1.03039905134002e-41
ENSG00000168890	TMEM150A	2	cg02017323	16	30411471	7.01442015638579	2.69529881236809e-12
ENSG00000168890	TMEM150A	2	cg02464912	14	64319543	18.4307952422076	6.72855082092271e-73
ENSG00000168890	TMEM150A	2	cg02560388	2	11969958	8.2186696657853	2.74342290674996e-16
ENSG00000168890	TMEM150A	2	cg02650017	17	47301614	16.6779735166652	1.91253560076027e-60
ENSG00000168890	TMEM150A	2	cg03699074	16	88849875	14.1778707270289	1.44938309004026e-44
ENSG00000168890	TMEM150A	2	cg04514047	5	10562456	11.9994591436996	1.27512517185102e-32
ENSG00000168890	TMEM150A	2	cg04718845	6	152623094	9.86375410518874	1.0768345316203e-22
ENSG00000168890	TMEM150A	2	cg05457903	8	145052304	7.27680755114835	4.08631724333873e-13
ENSG00000168890	TMEM150A	2	cg05548912	17	40464318	6.87998850060433	6.90879130016194e-12
ENSG00000168890	TMEM150A	2	cg05751148	11	67204799	7.70299197599307	1.66139401248188e-14
ENSG00000168890	TMEM150A	2	cg06130714	17	10024297	8.5127705699452	2.36253064546107e-17
ENSG00000168890	TMEM150A	2	cg06372654	7	128044655	7.24704410068836	5.07791660817746e-13
ENSG00000168890	TMEM150A	2	cg06625767	5	176836695	7.05070058358391	2.0845344972415e-12
ENSG00000168890	TMEM150A	2	cg06703222	16	69598327	14.4746557765093	2.48592807399201e-46
ENSG00000168890	TMEM150A	2	cg07046885	11	64691615	6.97927665862854	3.45296438543036e-12
ENSG00000168890	TMEM150A	2	cg07248440	16	17472479	6.98811793146343	3.24469571053208e-12
ENSG00000168890	TMEM150A	2	cg07387383	3	194722955	7.55409858375202	5.18609268019738e-14
ENSG00000168890	TMEM150A	2	cg08539067	3	49395985	21.8852726026987	1.99259914783868e-100
ENSG00000168890	TMEM150A	2	cg08847775	2	43422121	7.29781275187447	3.50368112994894e-13
ENSG00000168890	TMEM150A	2	cg10131972	22	19879787	7.86248002479174	4.79594457561229e-15
ENSG00000168890	TMEM150A	2	cg12200124	5	179220820	7.95636742360429	2.28226376155964e-15
ENSG00000168890	TMEM150A	2	cg13287553	7	4784419	9.4140713970429	7.7913454344726e-21
ENSG00000168890	TMEM150A	2	cg13467672	17	40464625	7.83254853618831	6.06644050803735e-15
ENSG00000168890	TMEM150A	2	cg16462073	16	28995843	8.96692705156059	4.57063515585789e-19
ENSG00000168890	TMEM150A	2	cg16627786	22	19711051	8.56943598203172	1.45934916162786e-17
ENSG00000168890	TMEM150A	2	cg18101225	4	15964913	12.5180249473367	2.66918704867502e-35
ENSG00000168890	TMEM150A	2	cg20692268	1	25358981	8.33455958822795	1.05405461786707e-16
ENSG00000168890	TMEM150A	2	cg23837109	10	75670435	8.87797873823863	1.00491209574344e-18
ENSG00000168890	TMEM150A	2	cg23856536	7	101384349	7.34796141714624	2.4226693638664e-13
ENSG00000168890	TMEM150A	2	cg24002003	15	101668143	12.8632135482724	3.85164966014315e-37
ENSG00000168890	TMEM150A	2	cg24819835	4	15780011	12.8583545665838	4.09141727759814e-37
ENSG00000168890	TMEM150A	2	cg25739715	22	30663881	7.23768348582129	5.4360652943168e-13
ENSG00000168890	TMEM150A	2	cg26562462	4	6929045	7.53009429071128	6.21859316755163e-14
ENSG00000168890	TMEM150A	2	cg27020362	5	138723394	8.16454447804523	4.27014152220729e-16
ENSG00000168890	TMEM150A	2	cg27107144	19	3061290	7.09714409124473	1.49747989207484e-12
ENSG00000163449	TMEM169	2	cg05607577	6	43544120	25.8473297318688	1.870329531898e-136
ENSG00000151353	TMEM18	2	cg11083276	6	24911313	9.46905599688889	4.66231454698219e-21
ENSG00000151353	TMEM18	2	cg12228919	15	44955936	10.1873816834896	4.40428936393796e-24
ENSG00000151353	TMEM18	2	cg18912160	10	3281074	-8.48959212312974	2.87462094138364e-17
ENSG00000226479	TMEM185B	2	cg24778081	11	506932	-8.24980077487735	2.12438950983201e-16
ENSG00000189362	TMEM194B	2	cg13357708	6	7986216	-9.30418640193326	2.15600781319188e-20
ENSG00000189362	TMEM194B	2	cg14570006	9	139760593	10.4524535676907	2.99032914505466e-25
ENSG00000123610	TNFAIP6	2	cg06164187	2	242641258	8.48675354885968	2.94442224046156e-17
ENSG00000204104	TRAF3IP1	2	cg01405143	19	9649327	-12.3231517526548	2.78840423471349e-34
ENSG00000204104	TRAF3IP1	2	cg07594831	8	101315560	-10.2170886045848	3.26850494689751e-24
ENSG00000204104	TRAF3IP1	2	cg16021909	1	248021091	-12.3353661747039	2.40944408075791e-34
ENSG00000204104	TRAF3IP1	2	cg17784811	6	31079617	-14.4351039243988	4.29225248160965e-46
ENSG00000171853	TRAPPC12	2	cg08163906	14	102227932	-10.0868556173777	1.20109632942812e-23
ENSG00000171853	TRAPPC12	2	cg14513730	10	134538449	15.6799276701897	7.79846535188761e-54
ENSG00000071575	TRIB2	2	cg01890083	4	183966200	9.30528014988912	2.13439312822071e-20
ENSG00000032389	TSSC1	2	cg20313246	10	134997471	9.83556299275205	1.41612270411543e-22
ENSG00000032389	TSSC1	2	cg27344576	8	109260414	-7.21830131809823	6.25833133420341e-13
ENSG00000123607	TTC21B	2	cg14011387	9	134228590	15.3848627746085	5.99658200792596e-52
ENSG00000135912	TTLL4	2	cg13348944	11	118047121	-7.71384451166704	1.52786393002148e-14
ENSG00000135912	TTLL4	2	cg14485185	11	118051260	-11.9528637836602	2.19381350217259e-32
ENSG00000184182	UBE2F	2	cg06893834	19	19843560	-11.8927535131011	4.40506079965397e-32
ENSG00000184182	UBE2F	2	cg16319085	4	85076551	-14.1233283715217	3.03470725613552e-44
ENSG00000135913	USP37	2	cg13348944	11	118047121	-7.57388957071565	4.46325130687793e-14
ENSG00000135913	USP37	2	cg14485185	11	118051260	-10.5728245560656	8.63062044530644e-26
ENSG00000168899	VAMP5	2	cg11102794	11	8285587	-12.1964155515394	1.25950206174163e-33
ENSG00000127831	VIL1	2	cg13348944	11	118047121	7.40129433451532	1.63214457660281e-13
ENSG00000127831	VIL1	2	cg14485185	11	118051260	10.7420397876409	1.47120531785054e-26
ENSG00000118965	WDR35	2	cg06625576	17	40179813	9.74017826634279	3.55809260237622e-22
ENSG00000079246	XRCC5	2	cg05607577	6	43544120	33.3818605872825	5.5225826497628e-216
ENSG00000188177	ZC3H6	2	cg05528533	6	35310264	7.39608300626528	1.69656806722171e-13
ENSG00000144161	ZC3H8	2	cg05528533	6	35310264	7.53786236000995	5.86408927193306e-14
ENSG00000115568	ZNF142	2	cg14485185	11	118051260	-7.88299382715523	4.08051829455157e-15
ENSG00000163067	ZNF2	2	cg00788028	2	114049041	-10.8836240920859	3.28153121575281e-27
ENSG00000163795	ZNF513	2	cg03929741	13	107187681	11.6702589554995	5.65401648140573e-31
ENSG00000163795	ZNF513	2	cg20744217	11	67211017	18.3878821594961	1.39758154775194e-72
ENSG00000163795	ZNF513	2	cg22608170	18	48086411	13.556395567746	5.65117592047947e-41
ENSG00000144026	ZNF514	2	cg00788028	2	114049041	6.83998871379304	9.11180289747758e-12
ENSG00000144026	ZNF514	2	cg24043887	11	695896	6.90523316122436	5.79697652412815e-12
ENSG00000075292	ZNF638	2	cg06263740	8	12565344	-8.54838735003777	1.7459283791556e-17
ENSG00000114770	ABCC5	3	cg01268824	19	58220818	7.9619012657493	2.18395919594406e-15
ENSG00000114770	ABCC5	3	cg01832549	1	19774989	-9.68201975532004	6.21428001107126e-22
ENSG00000114770	ABCC5	3	cg02639359	19	17862017	-7.21590301838394	6.36820943907153e-13
ENSG00000114770	ABCC5	3	cg03047995	14	24601588	-6.84076798513994	9.06293431169372e-12
ENSG00000114770	ABCC5	3	cg03234186	19	58220657	9.36501748203228	1.22897595946188e-20
ENSG00000114770	ABCC5	3	cg08668790	19	58220662	8.53741077173873	1.91673381077528e-17
ENSG00000114770	ABCC5	3	cg08706567	1	43814983	-7.05401372447343	2.03606200258797e-12
ENSG00000114770	ABCC5	3	cg11294513	19	58220295	7.49990840112587	7.80755704780282e-14
ENSG00000114770	ABCC5	3	cg11666770	19	42430910	-7.1119643831051	1.34690197685799e-12
ENSG00000114770	ABCC5	3	cg11839415	1	43814764	-6.91664731157126	5.35380020228986e-12
ENSG00000114770	ABCC5	3	cg12506930	19	58220718	8.12599342525709	5.84217587320003e-16
ENSG00000114770	ABCC5	3	cg13393721	1	43815035	-7.02015308866369	2.58826358724948e-12
ENSG00000114770	ABCC5	3	cg26465391	19	58220773	7.1214166423046	1.25873564422352e-12
ENSG00000114770	ABCC5	3	cg27049766	19	58220516	8.11776438098811	6.24532158081913e-16
ENSG00000114770	ABCC5	3	cg27324426	19	58220837	7.83910581771463	5.76243915611102e-15
ENSG00000163686	ABHD6	3	cg11805559	10	134859687	-22.6374891362598	6.4433203051593e-107
ENSG00000023330	ALAS1	3	cg02325318	14	96505636	-9.60877774432909	1.24865967284888e-21
ENSG00000145020	AMT	3	cg04415434	3	126423069	-12.6133892689208	8.3638873472374e-36
ENSG00000164062	APEH	3	cg08415592	22	36648973	6.95139763248773	4.19930652352708e-12
ENSG00000164062	APEH	3	cg10075733	9	94495746	10.0708248516564	1.40827146523442e-23
ENSG00000164062	APEH	3	cg21574349	3	185080951	-14.2343309668751	6.72663669135347e-45
ENSG00000164062	APEH	3	cg21582582	3	182698605	-24.2269946505989	3.51185434422591e-121
ENSG00000164062	APEH	3	cg21665057	3	196295764	-28.2356550133723	3.14238714438701e-160
ENSG00000177479	ARIH2	3	cg04415434	3	126423069	-7.97497590509584	1.96796579440061e-15
ENSG00000177479	ARIH2	3	cg16110400	11	106188289	-7.15869008394894	9.6302429753393e-13
ENSG00000177479	ARIH2	3	cg21582582	3	182698605	8.96621710745343	4.59960047387381e-19
ENSG00000177479	ARIH2	3	cg21665057	3	196295764	8.40633102657384	5.79223024470927e-17
ENSG00000069849	ATP1B3	3	cg23519930	2	60963021	-8.91409116191146	7.3047019560124e-19
ENSG00000164053	ATRIP	3	cg03492460	6	88441469	7.48665098345027	8.62580414859561e-14
ENSG00000164053	ATRIP	3	cg21574349	3	185080951	-7.94037027894723	2.59161905885483e-15
ENSG00000164053	ATRIP	3	cg21582582	3	182698605	-12.7321892319889	1.94854398948089e-36
ENSG00000164053	ATRIP	3	cg21665057	3	196295764	-13.0572515286328	3.39581016423869e-38
ENSG00000113916	BCL6	3	cg01032851	16	68994912	7.27301462337696	4.20122833954132e-13
ENSG00000113916	BCL6	3	cg01512113	1	1680232	7.70981031578614	1.57621966133113e-14
ENSG00000113916	BCL6	3	cg03998636	13	111210121	10.5990559315243	6.57163140339835e-26
ENSG00000113916	BCL6	3	cg06773488	18	74726002	6.8508373385317	8.45412021709114e-12
ENSG00000113916	BCL6	3	cg07081759	10	126330905	7.04725914501322	2.13608281237225e-12
ENSG00000113916	BCL6	3	cg08851837	16	57558820	8.81991074511781	1.6740491143459e-18
ENSG00000113916	BCL6	3	cg09743650	16	85675160	7.25861265303341	4.66718607046869e-13
ENSG00000113916	BCL6	3	cg10013455	10	134400191	7.30526003869637	3.31737732426602e-13
ENSG00000113916	BCL6	3	cg10967866	10	134362164	8.01133265764861	1.47193285004204e-15
ENSG00000113916	BCL6	3	cg12120406	17	25822056	8.1867744023833	3.56178988557423e-16
ENSG00000113916	BCL6	3	cg13380995	6	37670128	8.81789559485006	1.70386562895586e-18
ENSG00000113916	BCL6	3	cg13821176	8	126448338	8.10282292537002	7.04861056781099e-16
ENSG00000113916	BCL6	3	cg14009440	1	45138784	8.50333745323038	2.55905469337972e-17
ENSG00000113916	BCL6	3	cg14237301	16	28506477	9.84990910273039	1.23199071650946e-22
ENSG00000113916	BCL6	3	cg17192599	7	151504864	6.8879068118973	6.53926586222169e-12
ENSG00000113916	BCL6	3	cg18222865	11	14664689	7.78365027918033	8.88953491224616e-15
ENSG00000113916	BCL6	3	cg19137806	10	134362170	8.56719457787937	1.48750901069394e-17
ENSG00000113916	BCL6	3	cg21346154	2	70699808	7.60860629334536	3.42698173195863e-14
ENSG00000113916	BCL6	3	cg22448090	1	200978598	8.35463396115121	8.91964509025801e-17
ENSG00000113916	BCL6	3	cg24695071	7	2419958	7.59689734457657	3.74684083455602e-14
ENSG00000113916	BCL6	3	cg26426564	10	134371746	7.98351753315132	1.83837124820313e-15
ENSG00000113916	BCL6	3	cg26468118	13	111175670	7.732660099539	1.32093952193775e-14
ENSG00000113916	BCL6	3	cg26508444	10	126330845	8.36914935380798	7.90334456905279e-17
ENSG00000113916	BCL6	3	cg27262415	11	67205166	-6.90592024827228	5.76931060518418e-12
ENSG00000113916	BCL6	3	cg27389255	11	14664598	9.50031265054222	3.47765762101877e-21
ENSG00000188315	C3orf62	3	cg04415434	3	126423069	-8.04051361248938	1.16483093219839e-15
ENSG00000144712	CAND2	3	cg22611419	17	77070824	8.48760801386182	2.92323657655396e-17
ENSG00000244607	CCDC13	3	cg11293112	17	17809020	-13.4870664080182	1.39231925574501e-40
ENSG00000177352	CCDC71	3	cg04415434	3	126423069	7.68048992812747	1.97591089190902e-14
ENSG00000177352	CCDC71	3	cg16110400	11	106188289	6.81497917387875	1.08249422864576e-11
ENSG00000177352	CCDC71	3	cg21582582	3	182698605	-8.64294649797752	7.77687110144112e-18
ENSG00000177352	CCDC71	3	cg21665057	3	196295764	-8.34957774593494	9.30310238128158e-17
ENSG00000183813	CCR4	3	cg16660899	1	167095593	-10.0476819876465	1.77122763504509e-23
ENSG00000008300	CELSR3	3	cg21574349	3	185080951	6.91381539844416	5.46055220328749e-12
ENSG00000008300	CELSR3	3	cg21582582	3	182698605	13.4373759718609	2.65030252166216e-40
ENSG00000008300	CELSR3	3	cg21665057	3	196295764	14.5316680736882	1.12865507112009e-46
ENSG00000163528	CHCHD4	3	cg14367344	1	146644336	-10.5408467233231	1.20218987782515e-25
ENSG00000173402	DAG1	3	cg21574349	3	185080951	-10.2090366679482	3.54398208803539e-24
ENSG00000173402	DAG1	3	cg21582582	3	182698605	-18.5399711432414	1.04107111457533e-73
ENSG00000173402	DAG1	3	cg21665057	3	196295764	-19.5362893968858	2.74108102738321e-81
ENSG00000178149	DALRD3	3	cg03492460	6	88441469	-7.53792472299813	5.86132528241564e-14
ENSG00000178149	DALRD3	3	cg04415434	3	126423069	-10.7009600235961	2.26593906146866e-26
ENSG00000178700	DHFRL1	3	cg02491787	7	102739136	-8.68624983811564	5.35491662213801e-18
ENSG00000138246	DNAJC13	3	cg26709343	16	69373945	-9.01215156306542	3.05343297890642e-19
ENSG00000163687	DNASE1L3	3	cg11805559	10	134859687	23.9621334097524	9.39397927067024e-119
ENSG00000088538	DOCK3	3	cg21582582	3	182698605	8.15188526730779	4.73381758326862e-16
ENSG00000088538	DOCK3	3	cg21665057	3	196295764	7.39452927105962	1.71625477383892e-13
ENSG00000132394	EEFSEC	3	cg19802243	6	160321205	8.94163133360107	5.72275722518786e-19
ENSG00000132394	EEFSEC	3	cg19805863	1	246254338	60.4149708506554	0
ENSG00000113790	EHHADH	3	cg08549326	7	116617896	7.35013007110421	2.38419519211176e-13
ENSG00000163412	EIF4E3	3	cg06951627	6	26196580	6.87498703100177	7.1526640483289e-12
ENSG00000163412	EIF4E3	3	cg15845821	19	16830613	7.01736358401758	2.63981290873487e-12
ENSG00000163412	EIF4E3	3	cg19344626	19	16830749	7.16976443540864	8.89148226347369e-13
ENSG00000236438	FAM157A	3	cg01625126	15	102513445	6.84340683690237	8.89935049426418e-12
ENSG00000236438	FAM157A	3	cg13412283	7	65280	10.2886767777362	1.58770978364834e-24
ENSG00000185614	FAM212A	3	cg10075733	9	94495746	17.5528104314318	1.57894762107342e-66
ENSG00000185614	FAM212A	3	cg14021345	14	42076757	-7.60194036725959	3.60562934682551e-14
ENSG00000185614	FAM212A	3	cg21574349	3	185080951	-25.5457097354037	1.47651701430083e-133
ENSG00000185614	FAM212A	3	cg21582582	3	182698605	-52.7285897541079	0
ENSG00000185614	FAM212A	3	cg21665057	3	196295764	-60.2895560468625	0
ENSG00000185112	FAM43A	3	cg13711851	9	124080947	-7.21683008667487	6.32551298746996e-13
ENSG00000185112	FAM43A	3	cg14263575	9	95530146	-7.43824816999656	1.23942386159988e-13
ENSG00000136068	FLNB	3	cg11805559	10	134859687	-10.5513372175026	1.07845092105146e-25
ENSG00000168827	GFM1	3	cg23275840	4	47708675	7.72821390534149	1.3671960722054e-14
ENSG00000170266	GLB1	3	cg16660899	1	167095593	10.613500525495	5.65426032859147e-26
ENSG00000168237	GLYCTK	3	cg02325318	14	96505636	10.5168039297471	1.54142350231393e-25
ENSG00000163938	GNL3	3	cg02325318	14	96505636	12.2613651399444	5.82612584011573e-34
ENSG00000233276	GPX1	3	cg10075733	9	94495746	-10.4510822200618	3.03273359121587e-25
ENSG00000233276	GPX1	3	cg21574349	3	185080951	15.2466131958157	4.47364649210474e-51
ENSG00000233276	GPX1	3	cg21582582	3	182698605	25.8354441854478	2.43528094297355e-136
ENSG00000233276	GPX1	3	cg21665057	3	196295764	29.6665241840782	3.82319082386012e-175
ENSG00000082701	GSK3B	3	cg02809009	19	50354510	15.5888243813923	3.00366493932453e-53
ENSG00000163754	GYG1	3	cg24089360	19	57699963	-47.7198736642435	0
ENSG00000184897	H1FX	3	cg23060646	3	9904411	6.94450531026955	4.40695550540742e-12
ENSG00000114735	HEMK1	3	cg21582582	3	182698605	-7.04957566277023	2.10124861436883e-12
ENSG00000114735	HEMK1	3	cg21665057	3	196295764	-8.89704634946412	8.49280818195728e-19
ENSG00000163755	HPS3	3	cg24089360	19	57699963	-16.1516600373897	6.48375399180015e-57
ENSG00000186792	HYAL3	3	cg14021345	14	42076757	-8.3541274905989	8.95734155856861e-17
ENSG00000186792	HYAL3	3	cg21582582	3	182698605	-8.58366184610617	1.29249930482108e-17
ENSG00000186792	HYAL3	3	cg21665057	3	196295764	-9.28557029183763	2.55891967280959e-20
ENSG00000163702	IL17RC	3	cg08011255	17	80970504	9.3238150296488609	1.79906150146189e-20
ENSG00000114473	IQCG	3	cg03262918	3	107241738	-8.37687307497288	7.41004688242685e-17
ENSG00000171135	JAGN1	3	cg08011255	17	80970504	-8.85529459039493	1.22708235393223e-18
ENSG00000163807	KIAA1143	3	cg00981877	20	50366841	-13.0722417552484	2.8110376990334e-38
ENSG00000163807	KIAA1143	3	cg01775379	2	159316264	-12.0911041333385	4.36136509448445e-33
ENSG00000163807	KIAA1143	3	cg03617420	8	10916666	-6.95619503941517	4.06046780290311e-12
ENSG00000163807	KIAA1143	3	cg07196577	1	109850486	-11.547261420825	2.27417318114943e-30
ENSG00000163807	KIAA1143	3	cg12075928	8	141801307	-9.01103722901017	3.08400421862409e-19
ENSG00000163807	KIAA1143	3	cg16513984	1	12261884	-14.7053039156519	1.00173221451397e-47
ENSG00000163807	KIAA1143	3	cg20438915	2	159317294	-9.03435377601622	2.50311265902485e-19
ENSG00000163807	KIAA1143	3	cg23245063	14	100154773	7.79675192256846	8.02623800245834e-15
ENSG00000163807	KIAA1143	3	cg26675329	2	103033753	-9.90860986655645	6.95385938356014e-23
ENSG00000185909	KLHDC8B	3	cg21574349	3	185080951	-8.37860372214846	7.30375077066016e-17
ENSG00000185909	KLHDC8B	3	cg21582582	3	182698605	-14.2483207939353	5.55914295818578e-45
ENSG00000185909	KLHDC8B	3	cg21665057	3	196295764	-15.3744533463037	6.98006338280344e-52
ENSG00000172037	LAMB2	3	cg03492460	6	88441469	8.89494306281963	8.6520573798181e-19
ENSG00000172037	LAMB2	3	cg21582582	3	182698605	-7.1648180198399	9.21431015519539e-13
ENSG00000172037	LAMB2	3	cg21665057	3	196295764	-7.65812443807918	2.34638872553327e-14
ENSG00000225873	LINC00694	3	cg10821830	2	79823717	-10.1275118762948	8.01400471483807e-24
ENSG00000225873	LINC00694	3	cg10860819	12	40619282	7.88530549242361	4.00680751883554e-15
ENSG00000225873	LINC00694	3	cg11070059	7	96626399	8.66166698583063	6.61974575861224e-18
ENSG00000225873	LINC00694	3	cg22240853	3	15373710	-7.35985319943031	2.21894940179397e-13
ENSG00000242086	LINC00969	3	cg04481584	5	231809	-15.2277300225337	5.87935834049094e-51
ENSG00000242086	LINC00969	3	cg07608658	3	9851477	23.8001632726895	2.80149165752503e-117
ENSG00000242086	LINC00969	3	cg17016932	5	1654343	12.3396248014543	2.28973390270164e-34
ENSG00000242086	LINC00969	3	cg17482712	5	218077	8.03677038233202	1.20037908048383e-15
ENSG00000242086	LINC00969	3	cg17952111	19	54960355	17.548802679583	1.68593980608209e-66
ENSG00000242086	LINC00969	3	cg18050722	5	271346	-7.14665992413664	1.05011049960831e-12
ENSG00000242086	LINC00969	3	cg20365451	2	242961267	-13.3627976903603	6.93616996398356e-40
ENSG00000242086	LINC00969	3	cg20990478	5	272354	31.1114781428276	1.11243905087667e-190
ENSG00000242086	LINC00969	3	cg24069048	5	256469	-12.0457615524879	7.4225672735479e-33
ENSG00000185621	LMLN	3	cg01625126	15	102513445	-6.78445397187082	1.33474901908993e-11
ENSG00000093167	LRRFIP2	3	cg02012712	14	20779703	7.9647632101443	2.13476769967567e-15
ENSG00000170860	LSM3	3	cg14367344	1	146644336	8.05368396016752	1.04780954621359e-15
ENSG00000047849	MAP4	3	cg03492460	6	88441469	-12.2667150015777	5.46674021415694e-34
ENSG00000047849	MAP4	3	cg14862260	6	31860279	-15.5898205012123	2.95981316988536e-53
ENSG00000114738	MAPKAPK3	3	cg21582582	3	182698605	-7.77367765777671	9.6073367228617e-15
ENSG00000114738	MAPKAPK3	3	cg21665057	3	196295764	-7.07025133144586	1.81404172051268e-12
ENSG00000173531	MST1	3	cg21582582	3	182698605	-9.10850068306481	1.28470299237107e-19
ENSG00000173531	MST1	3	cg21665057	3	196295764	-9.98722247739815	3.21687777817924e-23
ENSG00000176945	MUC20	3	cg07608658	3	9851477	-17.0643439536607	4.24486460834317e-63
ENSG00000176945	MUC20	3	cg16546681	1	155244518	-6.91391197478655	5.45687751755846e-12
ENSG00000176945	MUC20	3	cg17952111	19	54960355	-17.1646947282139	8.51277086466511e-64
ENSG00000176945	MUC20	3	cg20990478	5	272354	-8.79029932969623	2.16903679316845e-18
ENSG00000243477	NAT6	3	cg14021345	14	42076757	8.34517220102642	9.65044013507489e-17
ENSG00000243477	NAT6	3	cg21582582	3	182698605	8.52650985553426	2.10266156735823e-17
ENSG00000243477	NAT6	3	cg21665057	3	196295764	9.23000349011683	4.25912564106777e-20
ENSG00000213672	NCKIPSD	3	cg04415434	3	126423069	-7.87978071569349	4.18519571995191e-15
ENSG00000213672	NCKIPSD	3	cg21582582	3	182698605	9.70157412084106	5.15367615482452e-22
ENSG00000213672	NCKIPSD	3	cg21665057	3	196295764	10.1206544887823	8.58095082248017e-24
ENSG00000178057	NDUFAF3	3	cg00688850	7	38303957	-6.88173290363527	6.82566627399805e-12
ENSG00000178057	NDUFAF3	3	cg03492460	6	88441469	-7.21974137130032	6.19325217637889e-13
ENSG00000178057	NDUFAF3	3	cg04415434	3	126423069	-10.8129803445948	6.95313895005243e-27
ENSG00000114670	NEK11	3	cg07461370	5	49397	-8.10479507022746	6.93701678801434e-16
ENSG00000114904	NEK4	3	cg02325318	14	96505636	9.38684746238422	1.00364385936788e-20
ENSG00000145029	NICN1	3	cg03492460	6	88441469	7.84628079140865	5.44697518922099e-15
ENSG00000145029	NICN1	3	cg04415434	3	126423069	11.1368839393072	2.14203181703676e-28
ENSG00000168268	NT5DC2	3	cg02325318	14	96505636	9.62907284686585	1.02963786878863e-21
ENSG00000144815	NXPE3	3	cg03234186	19	58220657	-7.17647582738781	8.47115836847577e-13
ENSG00000144815	NXPE3	3	cg06615754	19	58193071	-8.88390044101383	9.53781392306574e-19
ENSG00000144815	NXPE3	3	cg11294513	19	58220295	-7.20857404253722	6.7158601797176e-13
ENSG00000144815	NXPE3	3	cg11788523	19	58446770	-7.19595448607928	7.35865129182754e-13
ENSG00000144815	NXPE3	3	cg12506930	19	58220718	-6.82638499449079	1.00077071136686e-11
ENSG00000144815	NXPE3	3	cg18673377	19	58446898	-7.41657692195346	1.45676717112212e-13
ENSG00000144815	NXPE3	3	cg25361961	19	58070048	-8.28385224773797	1.60437417054033e-16
ENSG00000144815	NXPE3	3	cg25400396	19	58400559	-7.24475644920934	5.1632439047279e-13
ENSG00000144815	NXPE3	3	cg27324426	19	58220837	-6.98318709379752	3.35927939289746e-12
ENSG00000144909	OSBPL11	3	cg21903625	3	12810386	6.99382945391484	3.11675747761219e-12
ENSG00000151093	OXSM	3	cg27474149	6	29572333	-13.4757025293139	1.61344368073588e-40
ENSG00000178467	P4HTM	3	cg04415434	3	126423069	-7.9271995636776	2.87702908481194e-15
ENSG00000178467	P4HTM	3	cg16110400	11	106188289	-7.22687454233773	5.88056150940959e-13
ENSG00000178467	P4HTM	3	cg21582582	3	182698605	9.25561654221494	3.36887775400436e-20
ENSG00000178467	P4HTM	3	cg21665057	3	196295764	8.77576009877645	2.46248713649714e-18
ENSG00000168291	PDHB	3	cg11805559	10	134859687	21.2248411995875	7.17264252897835e-95
ENSG00000070087	PFN2	3	cg03199644	12	69919742	7.01618536627239	2.66188741304527e-12
ENSG00000070087	PFN2	3	cg24046770	2	152263618	7.21062294609441	6.61683596514755e-13
ENSG00000144647	POMGNT2	3	cg11293112	17	17809020	11.9432469070602	2.45318545068762e-32
ENSG00000164088	PPM1M	3	cg02325318	14	96505636	10.7125071866832	2.00719671019987e-26
ENSG00000114302	PRKAR2A	3	cg21574349	3	185080951	7.6208596391238	3.1210193634398e-14
ENSG00000114302	PRKAR2A	3	cg21582582	3	182698605	13.4722028759875	1.68833349072466e-40
ENSG00000114302	PRKAR2A	3	cg21665057	3	196295764	14.6667882398813	1.71799683777981e-47
ENSG00000076201	PTPN23	3	cg03492460	6	88441469	57.6578858894398	0
ENSG00000168297	PXK	3	cg11805559	10	134859687	-37.6829741930387	1.47548511518878e-266
ENSG00000198218	QRICH1	3	cg03492460	6	88441469	7.60023164694994	3.65287926066014e-14
ENSG00000198218	QRICH1	3	cg04415434	3	126423069	10.8729702641635	3.67605999168128e-27
ENSG00000155903	RASA2	3	cg21806580	5	18746010	8.5350677065875	1.95527645485279e-17
ENSG00000004534	RBM6	3	cg10075733	9	94495746	13.5549874321347	5.75586491941381e-41
ENSG00000004534	RBM6	3	cg10708588	1	23810816	7.74260880602458	1.22294421180384e-14
ENSG00000004534	RBM6	3	cg14021345	14	42076757	-9.01026586400576	3.10534324790671e-19
ENSG00000004534	RBM6	3	cg21574349	3	185080951	-19.3091755505674	1.56530645397379e-79
ENSG00000004534	RBM6	3	cg21582582	3	182698605	-37.3119866823109	4.50031008577494e-262
ENSG00000004534	RBM6	3	cg21665057	3	196295764	-40.8363482626286	1.74569075381284e-305
ENSG00000164068	RNF123	3	cg10075733	9	94495746	-16.8087177414105	2.45171194588232e-61
ENSG00000164068	RNF123	3	cg14021345	14	42076757	7.65107475491272	2.47674917933107e-14
ENSG00000164068	RNF123	3	cg21574349	3	185080951	23.6978593109165	2.37068386640896e-116
ENSG00000164068	RNF123	3	cg21582582	3	182698605	46.9677549262385	0
ENSG00000164068	RNF123	3	cg21665057	3	196295764	53.3922313265383	0
ENSG00000082996	RNF13	3	cg03199644	12	69919742	-8.29107351477468	1.51142903013511e-16
ENSG00000082996	RNF13	3	cg24046770	2	152263618	-8.24549014936965	2.20107888573666e-16
ENSG00000188846	RPL14	3	cg01882498	4	83934956	17.5748331224378	1.10103651345105e-66
ENSG00000188846	RPL14	3	cg02797201	11	62526262	-7.27094716955997	4.26519481900275e-13
ENSG00000168028	RPSA	3	cg26457421	3	56591241	10.3354140353076	9.88435140621064e-25
ENSG00000174891	RSRC1	3	cg23275840	4	47708675	12.6136394860625	8.33837198424992e-36
ENSG00000175792	RUVBL1	3	cg19805863	1	246254338	-12.2522042052524	6.49686210277256e-34
ENSG00000114650	SCAP	3	cg03492460	6	88441469	-56.4386696868449	0
ENSG00000138468	SENP7	3	cg00298065	19	58715577	13.6668834123812	1.33141953546376e-41
ENSG00000138468	SENP7	3	cg00541956	19	58455018	-13.9846159519387	1.96480261991117e-43
ENSG00000138468	SENP7	3	cg00569896	4	204382	-16.7273476498844	8.81879520995862e-61
ENSG00000138468	SENP7	3	cg00578032	19	38308069	-10.6555784130173	3.64493936006475e-26
ENSG00000138468	SENP7	3	cg00647741	19	58693450	-14.8791688539277	8.63832112913683e-49
ENSG00000138468	SENP7	3	cg00664634	19	58513648	-6.8739199905015	7.20577513905303e-12
ENSG00000138468	SENP7	3	cg00880079	19	37157318	-7.42363934674051	1.3821129672155e-13
ENSG00000138468	SENP7	3	cg01268824	19	58220818	-18.5917865204393	4.27995073968693e-74
ENSG00000138468	SENP7	3	cg01278873	19	44764101	-6.79419325127158	1.2485770096674e-11
ENSG00000138468	SENP7	3	cg01436998	19	38308263	-8.77977680918903	2.37770660176257e-18
ENSG00000138468	SENP7	3	cg01501009	19	57183268	-10.6925514729962	2.47491563505447e-26
ENSG00000138468	SENP7	3	cg01586208	19	22806647	9.49812240709201	3.54993922637739e-21
ENSG00000138468	SENP7	3	cg01644850	19	58193231	-11.3437225591423	2.20867010066719e-29
ENSG00000138468	SENP7	3	cg01947224	19	58089885	-9.41680297166196	7.59560212130906e-21
ENSG00000138468	SENP7	3	cg02280912	19	58400095	-21.0220188147155	3.42703621718462e-93
ENSG00000138468	SENP7	3	cg02348449	19	58630429	-8.04336990936606	1.13840540084863e-15
ENSG00000138468	SENP7	3	cg02570223	19	38210840	-7.47284403112236	9.56757110360781e-14
ENSG00000138468	SENP7	3	cg02902617	14	93031178	7.29015840127936	3.70587151097718e-13
ENSG00000138468	SENP7	3	cg02940165	19	57149563	-11.9801882581056	1.59629661126767e-32
ENSG00000138468	SENP7	3	cg02959669	19	58459358	-7.25487137791727	4.79631198391779e-13
ENSG00000138468	SENP7	3	cg03005603	19	52873173	-6.95727948144354	4.02971309309058e-12
ENSG00000138468	SENP7	3	cg03007201	19	57875238	-11.4611054784437	5.98022361516578e-30
ENSG00000138468	SENP7	3	cg03077453	19	52900914	-8.89053504849163	8.99544090032844e-19
ENSG00000138468	SENP7	3	cg03085549	16	75150819	7.67918797403043	1.99580232024267e-14
ENSG00000138468	SENP7	3	cg03092271	19	23945472	-10.2786426598989	1.75730217298031e-24
ENSG00000138468	SENP7	3	cg03142586	19	58220080	-9.92914867959624	5.68845684630534e-23
ENSG00000138468	SENP7	3	cg03234186	19	58220657	-22.8408257568877	1.06067017328708e-108
ENSG00000138468	SENP7	3	cg03562414	19	52391078	-12.0274180014322	9.19925189300268e-33
ENSG00000138468	SENP7	3	cg03584535	19	58280832	-11.8220565073662	9.95933954868385e-32
ENSG00000138468	SENP7	3	cg03611452	19	38183253	-7.08042112543865	1.68727767630293e-12
ENSG00000138468	SENP7	3	cg03743982	16	75150833	7.2579391697929	4.69017583891415e-13
ENSG00000138468	SENP7	3	cg03975694	19	38042472	-10.092813414986	1.1320554346434e-23
ENSG00000138468	SENP7	3	cg03991512	16	75150456	7.70217304011386	1.67192401035239e-14
ENSG00000138468	SENP7	3	cg04062087	19	58666832	-8.12482173334516	5.89797126267485e-16
ENSG00000138468	SENP7	3	cg04206284	7	64127516	-8.85153990993715	1.268270153499e-18
ENSG00000138468	SENP7	3	cg04358463	19	56215104	-7.57440833941038	4.44570282121778e-14
ENSG00000138468	SENP7	3	cg04684267	19	58694502	-21.2037321380515	1.0741056696485e-94
ENSG00000138468	SENP7	3	cg04818919	19	37998171	-9.06205343687733	1.95219321520029e-19
ENSG00000138468	SENP7	3	cg05023114	19	58176305	8.54487596192839	1.79886652413908e-17
ENSG00000138468	SENP7	3	cg05220114	19	58223693	-15.4733628105055	1.64273551448706e-52
ENSG00000138468	SENP7	3	cg05280698	19	37825388	-13.7882990480442	2.685978121431e-42
ENSG00000138468	SENP7	3	cg05508084	19	56988398	-8.12592880734242	5.8452393444706e-16
ENSG00000138468	SENP7	3	cg05661282	19	58220370	-15.702214987227	5.60122471789277e-54
ENSG00000138468	SENP7	3	cg05974498	19	52599256	-11.0214308289978	7.48642509648125e-28
ENSG00000138468	SENP7	3	cg05983315	19	58545837	-8.2694121610247	1.80746149359004e-16
ENSG00000138468	SENP7	3	cg06368093	19	58513526	-11.3295974277073	2.58253596335757e-29
ENSG00000138468	SENP7	3	cg06442489	19	58630612	-11.8249061821811	9.63801788921788e-32
ENSG00000138468	SENP7	3	cg06458239	19	58038573	-9.19097603462278	6.08109677556953e-20
ENSG00000138468	SENP7	3	cg06484123	19	53107200	-11.6274292639499	9.19414285493621e-31
ENSG00000138468	SENP7	3	cg06585566	19	57276794	-8.06285124859252	9.73275106342792e-16
ENSG00000138468	SENP7	3	cg06615754	19	58193071	-23.720693582946	1.47271673754863e-116
ENSG00000138468	SENP7	3	cg06707978	19	58095155	-8.03710880599244	1.19712171702178e-15
ENSG00000138468	SENP7	3	cg06878361	19	52390810	-9.12285612065473	1.12839844817085e-19
ENSG00000138468	SENP7	3	cg06940614	19	38182773	-12.235888343848	7.88693650833274e-34
ENSG00000138468	SENP7	3	cg06942685	19	56879432	-8.77360497440668	2.50919901202608e-18
ENSG00000138468	SENP7	3	cg07172885	12	133757907	-8.41929956855446	5.19564393335259e-17
ENSG00000138468	SENP7	3	cg07227744	19	20278059	-6.80857607076318	1.13120277869807e-11
ENSG00000138468	SENP7	3	cg07237326	19	37742739	-10.9827789619259	1.13511800429796e-27
ENSG00000138468	SENP7	3	cg07320140	16	75150611	7.30614067345845	3.29600113792966e-13
ENSG00000138468	SENP7	3	cg07388347	12	133481466	-7.16439381433514	9.2425257553302e-13
ENSG00000138468	SENP7	3	cg07474494	19	58446600	-15.2877932818217	2.46275891975601e-51
ENSG00000138468	SENP7	3	cg07685728	19	58280891	-13.7077619428265	7.77798962887131e-42
ENSG00000138468	SENP7	3	cg07788092	19	9473691	-7.71360150478287	1.53073493532243e-14
ENSG00000138468	SENP7	3	cg07808761	19	37329760	-8.74530778708607	3.21009519157441e-18
ENSG00000138468	SENP7	3	cg07815836	19	58715351	12.0451168408605	7.47880049572856e-33
ENSG00000138468	SENP7	3	cg07816786	19	37063800	-10.2612903134275	2.09398198043627e-24
ENSG00000138468	SENP7	3	cg07894352	19	44763993	-9.15158627638087	8.69874624098362e-20
ENSG00000138468	SENP7	3	cg08103220	16	2977336	-11.445664784586	7.10662674312264e-30
ENSG00000138468	SENP7	3	cg08140458	19	58280728	-6.93595069807471	4.67873018987194e-12
ENSG00000138468	SENP7	3	cg08146323	19	57183118	-11.2091643432118	9.72589785810082e-29
ENSG00000138468	SENP7	3	cg08158952	19	57183016	-12.2437140773641	7.18676188753121e-34
ENSG00000138468	SENP7	3	cg08318732	19	53192577	-7.27967206021911	4.00158549214939e-13
ENSG00000138468	SENP7	3	cg08333333	19	57182844	-11.5193360724363	3.11343241012067e-30
ENSG00000138468	SENP7	3	cg08527195	1	161442697	10.0770165657973	1.32436007539733e-23
ENSG00000138468	SENP7	3	cg08648727	19	58446436	-8.90600467708801	7.8463503845646e-19
ENSG00000138468	SENP7	3	cg08668790	19	58220662	-20.9543936727469	1.23580983655458e-92
ENSG00000138468	SENP7	3	cg08672999	19	52675203	-7.11627286796907	1.30598714491048e-12
ENSG00000138468	SENP7	3	cg09013032	4	88225834	7.90256629357428	3.49635716663321e-15
ENSG00000138468	SENP7	3	cg09259115	19	37288793	-8.27762178900299	1.6890806939103e-16
ENSG00000138468	SENP7	3	cg09279169	19	38147309	-10.3794783593336	6.31104777180077e-25
ENSG00000138468	SENP7	3	cg09547119	19	52391367	-11.59345859265	1.35045829993341e-30
ENSG00000138468	SENP7	3	cg09577391	19	58515046	-7.34348624359977	2.50400220586719e-13
ENSG00000138468	SENP7	3	cg09578475	19	9473688	-7.5654441901728	4.75870662782098e-14
ENSG00000138468	SENP7	3	cg09643544	19	9473696	-8.23799350981075	2.34100523115088e-16
ENSG00000138468	SENP7	3	cg09846895	1	161442738	7.63388483791996	2.82524021940111e-14
ENSG00000138468	SENP7	3	cg09899215	16	75150799	7.27678587422753	4.08696511522512e-13
ENSG00000138468	SENP7	3	cg10051935	19	58740549	-12.4510188960789	6.00338562270937e-35
ENSG00000138468	SENP7	3	cg10132208	19	58545542	-8.46438968779274	3.55611897655718e-17
ENSG00000138468	SENP7	3	cg10149225	19	58521273	-6.86212647216821	7.81915875506382e-12
ENSG00000138468	SENP7	3	cg10197305	4	125112	-6.81106257654801	1.11203797973178e-11
ENSG00000138468	SENP7	3	cg10635122	19	52391090	-11.6351797941982	8.42080139285265e-31
ENSG00000138468	SENP7	3	cg10705236	19	57901745	-8.28137413256529	1.63755159895085e-16
ENSG00000138468	SENP7	3	cg10710439	19	38183976	-11.5447322687322	2.33986624089287e-30
ENSG00000138468	SENP7	3	cg10729426	19	58038585	-7.8204895379817	6.66728581264319e-15
ENSG00000138468	SENP7	3	cg10783469	19	52391234	-9.81144608484821	1.78899651088017e-22
ENSG00000138468	SENP7	3	cg10850725	19	44764380	-7.3967108307296	1.68867629041123e-13
ENSG00000138468	SENP7	3	cg11269599	19	52391304	-10.5016027786974	1.80324560920211e-25
ENSG00000138468	SENP7	3	cg11279918	19	58739805	-7.46297104016144	1.03022872831665e-13
ENSG00000138468	SENP7	3	cg11294513	19	58220295	-21.2248770152745	7.16772810810201e-95
ENSG00000138468	SENP7	3	cg11312896	19	58545122	-10.2545193748669	2.24204977069881e-24
ENSG00000138468	SENP7	3	cg11335411	19	58694111	-17.7709461347516	4.36730891747695e-68
ENSG00000138468	SENP7	3	cg11546251	19	58322078	-8.16233619405589	4.34766983808269e-16
ENSG00000138468	SENP7	3	cg11680826	19	37710094	-8.31959057991874	1.19351991685543e-16
ENSG00000138468	SENP7	3	cg11788523	19	58446770	-19.2489972540065	4.54176797190238e-79
ENSG00000138468	SENP7	3	cg11909748	19	52956674	-7.93776927977387	2.64567937282681e-15
ENSG00000138468	SENP7	3	cg11963365	5	141320784	6.87777254716646	7.01581909452741e-12
ENSG00000138468	SENP7	3	cg11998703	19	58446669	-16.0024517656581	6.23315349298038e-56
ENSG00000138468	SENP7	3	cg12024906	19	37825679	-12.511918331337	2.8742970404743e-35
ENSG00000138468	SENP7	3	cg12157673	19	52996617	7.46738110845429	9.96749174023858e-14
ENSG00000138468	SENP7	3	cg12227172	19	52391411	-9.30161682965434	2.20764326627429e-20
ENSG00000138468	SENP7	3	cg12259537	19	58514694	-9.90531789968904	7.18111218880031e-23
ENSG00000138468	SENP7	3	cg12302428	19	52408520	-7.0361052865613	2.31189925699374e-12
ENSG00000138468	SENP7	3	cg12355110	19	57617754	-7.06619027531691	1.86723278599759e-12
ENSG00000138468	SENP7	3	cg12476763	19	58111647	-7.23592929472218	5.50589056069428e-13
ENSG00000138468	SENP7	3	cg12506930	19	58220718	-21.7461914229253	3.0246034610198e-99
ENSG00000138468	SENP7	3	cg12665460	19	52956657	-7.5120016221677	7.12802125716238e-14
ENSG00000138468	SENP7	3	cg12717203	4	124342	-7.30163827878383	3.40673165763988e-13
ENSG00000138468	SENP7	3	cg12948621	19	37825446	-12.0293297873619	8.99591519153295e-33
ENSG00000138468	SENP7	3	cg12961842	19	58446758	-13.1446178390542	1.12559052417294e-38
ENSG00000138468	SENP7	3	cg13122377	19	57683687	-12.3641780519917	1.70626678776803e-34
ENSG00000138468	SENP7	3	cg13208922	4	299022	-12.2726523611049	5.09363159186439e-34
ENSG00000138468	SENP7	3	cg13337047	19	57683843	-9.67818912102611	6.44605659095863e-22
ENSG00000138468	SENP7	3	cg13382661	19	58280767	-8.06765272017676	9.36347602927284e-16
ENSG00000138468	SENP7	3	cg13393830	19	52391605	-11.2746009748554	4.73949567768337e-29
ENSG00000138468	SENP7	3	cg13535626	4	206267	9.02458549599648	2.73198141431056e-19
ENSG00000138468	SENP7	3	cg13540795	19	52551618	-7.63044951741322	2.90045881303317e-14
ENSG00000138468	SENP7	3	cg13551269	19	19977733	-8.07175176628728	9.05917549487639e-16
ENSG00000138468	SENP7	3	cg13636880	19	58280927	-7.8426992670664	5.60225901121878e-15
ENSG00000138468	SENP7	3	cg13668618	19	58446745	-11.3810221954868	1.46020460066161e-29
ENSG00000138468	SENP7	3	cg13672300	19	52901307	-7.23669892047003	5.47514794971339e-13
ENSG00000138468	SENP7	3	cg13687570	19	37825320	-10.3706133479695	6.90817556049149e-25
ENSG00000138468	SENP7	3	cg13933427	19	44405818	-8.06530041722658	9.54263000826335e-16
ENSG00000138468	SENP7	3	cg14025336	19	52900901	-8.364822255192	8.19372290272875e-17
ENSG00000138468	SENP7	3	cg14166009	19	37825309	-8.67138237000672	6.08802272907762e-18
ENSG00000138468	SENP7	3	cg14186187	4	206282	8.70932612003258	4.38616495362208e-18
ENSG00000138468	SENP7	3	cg14239592	19	58715251	10.7127316825833	2.00246830208342e-26
ENSG00000138468	SENP7	3	cg14256102	19	52511853	-8.82728002451159	1.56933594694277e-18
ENSG00000138468	SENP7	3	cg14283758	4	299370	-11.3480301470194	2.1057356320619e-29
ENSG00000138468	SENP7	3	cg14386312	19	58740861	-8.95318358085622	5.16477646614113e-19
ENSG00000138468	SENP7	3	cg14568105	19	37282931	-10.7950707824384	8.40507910547889e-27
ENSG00000138468	SENP7	3	cg14582763	19	52956683	-9.04269584409349	2.32273857724106e-19
ENSG00000138468	SENP7	3	cg14603375	19	57831549	-7.81069834233678	7.19792385066342e-15
ENSG00000138468	SENP7	3	cg14626309	4	299051	-13.8450955751936	1.2647142819664e-42
ENSG00000138468	SENP7	3	cg14713139	19	53811826	-7.01322389527964	2.71817483674381e-12
ENSG00000138468	SENP7	3	cg14732998	19	37997831	-7.10626520809332	1.40296125070026e-12
ENSG00000138468	SENP7	3	cg14886059	19	58545001	-7.51224537192732	7.11494064973891e-14
ENSG00000138468	SENP7	3	cg15060012	19	58446783	-18.6316283554713	2.15770000566886e-74
ENSG00000138468	SENP7	3	cg15091407	19	57149499	-6.96416189474396	3.8397863842859e-12
ENSG00000138468	SENP7	3	cg15117681	17	80202426	9.17625373402732	6.95288901153776e-20
ENSG00000138468	SENP7	3	cg15152331	2	160958810	-7.03502696091644	2.32963103734292e-12
ENSG00000138468	SENP7	3	cg15235999	19	52996352	7.60980833657127	3.3957067377784e-14
ENSG00000138468	SENP7	3	cg15415136	19	38042418	-8.86661719614762	1.11071172578431e-18
ENSG00000138468	SENP7	3	cg15439725	4	299311	-7.11800712212061	1.2898646673348e-12
ENSG00000138468	SENP7	3	cg15746696	19	58400494	-21.9855210392379	2.78180900967104e-101
ENSG00000138468	SENP7	3	cg15759937	19	58400325	-12.5077589790527	3.02289683671602e-35
ENSG00000138468	SENP7	3	cg15800907	19	52328110	-10.5950988327523	6.84773609912356e-26
ENSG00000138468	SENP7	3	cg16105687	19	22805801	-6.85532804298611	8.19570422083974e-12
ENSG00000138468	SENP7	3	cg16540789	16	75150784	7.11397657744476	1.32763926536777e-12
ENSG00000138468	SENP7	3	cg16590237	19	37742956	-6.83462795748952	9.45504922190689e-12
ENSG00000138468	SENP7	3	cg16731240	19	52391250	-8.70856363458276	4.4152172644814e-18
ENSG00000138468	SENP7	3	cg16831331	17	79047681	6.9332144147146	4.76908011585037e-12
ENSG00000138468	SENP7	3	cg17114866	19	35222640	-7.43804453370084	1.24130959216479e-13
ENSG00000138468	SENP7	3	cg17201760	4	206562	7.47074955004401	9.71900014824739e-14
ENSG00000138468	SENP7	3	cg17271561	19	52839334	-8.66801232496649	6.26750664394506e-18
ENSG00000138468	SENP7	3	cg17332326	19	37997471	-7.45200939585034	1.11830921075797e-13
ENSG00000138468	SENP7	3	cg17431052	19	37742481	-9.71813628571611	4.39703654979638e-22
ENSG00000138468	SENP7	3	cg17650272	19	52873019	-9.9015741112915	7.44850406668559e-23
ENSG00000138468	SENP7	3	cg17798563	19	58094517	11.3316395759221	2.52483084492142e-29
ENSG00000138468	SENP7	3	cg17823234	19	38180021	-8.00924591269746	1.4967248086088e-15
ENSG00000138468	SENP7	3	cg18005867	4	206232	11.7132911240311	3.46325919215334e-31
ENSG00000138468	SENP7	3	cg18673377	19	58446898	-21.5387310979855	1.70474526805148e-97
ENSG00000138468	SENP7	3	cg18860954	19	58400574	-20.9863771113263	6.74032050179021e-93
ENSG00000138468	SENP7	3	cg19247475	5	140789745	6.79918262044678	1.20656790623996e-11
ENSG00000138468	SENP7	3	cg19311218	19	44952417	-7.88838085720793	3.91077452865657e-15
ENSG00000138468	SENP7	3	cg19355079	19	23253218	-8.15879563533055	4.47487716955929e-16
ENSG00000138468	SENP7	3	cg19375479	19	44952604	-7.67298053388491	2.09338287887407e-14
ENSG00000138468	SENP7	3	cg19416570	19	58715677	11.0778404177554	4.06821584820981e-28
ENSG00000138468	SENP7	3	cg19866478	19	52801051	-7.78485949317173	8.80617135932326e-15
ENSG00000138468	SENP7	3	cg19904905	19	49469667	7.88146196752187	4.13009789953635e-15
ENSG00000138468	SENP7	3	cg19915738	19	44952730	-9.32388621911261	1.79787976417827e-20
ENSG00000138468	SENP7	3	cg20320494	4	124232	-7.67067268458469	2.13084682803975e-14
ENSG00000138468	SENP7	3	cg20404336	12	133757909	-9.15464630943218	8.46059408902094e-20
ENSG00000138468	SENP7	3	cg20440041	19	37096816	-12.6688295452268	4.24443904843864e-36
ENSG00000138468	SENP7	3	cg20449685	19	58545728	-8.15618235901194	4.57111542672287e-16
ENSG00000138468	SENP7	3	cg20715764	19	57702697	-7.276472147396	4.09635297392193e-13
ENSG00000138468	SENP7	3	cg20724579	19	53637178	-7.24163160999556	5.28207697475026e-13
ENSG00000138468	SENP7	3	cg21020710	19	58739803	-7.84490331650718	5.50619011152039e-15
ENSG00000138468	SENP7	3	cg21444693	19	58446787	-20.0010830217327	6.17119523852991e-85
ENSG00000138468	SENP7	3	cg21489303	19	57989182	-13.7155773751149	7.01719865982884e-42
ENSG00000138468	SENP7	3	cg21493505	19	56879418	-7.26009376756318	4.61701598935599e-13
ENSG00000138468	SENP7	3	cg21553182	19	52956821	-8.92700391896571	6.51541061481639e-19
ENSG00000138468	SENP7	3	cg21759268	19	58446988	-10.392838624822	5.50645076486816e-25
ENSG00000138468	SENP7	3	cg21790626	19	58220494	-14.5735077426281	6.31149786519257e-47
ENSG00000138468	SENP7	3	cg21808240	19	36822564	-10.703389646347	2.20888367695876e-26
ENSG00000138468	SENP7	3	cg21907914	19	53757677	-7.4707731099609	9.71728375395029e-14
ENSG00000138468	SENP7	3	cg22001557	19	58239424	-11.6035974583395	1.20418869476699e-30
ENSG00000138468	SENP7	3	cg22022580	19	37266605	-7.48982648281661	8.4224490401132e-14
ENSG00000138468	SENP7	3	cg22331349	19	52391350	-11.329408571249	2.58793816858998e-29
ENSG00000138468	SENP7	3	cg22356268	19	58693616	-7.28299675456695	3.90540414165707e-13
ENSG00000138468	SENP7	3	cg22457238	19	58570995	-10.5896009403147	7.25053667893325e-26
ENSG00000138468	SENP7	3	cg22472290	19	52391480	-12.3123513129343	3.17250871630809e-34
ENSG00000138468	SENP7	3	cg22510337	19	58399967	-19.2194113151662	7.66004987389448e-79
ENSG00000138468	SENP7	3	cg22517995	19	37096588	-9.22694465844853	4.37990234166764e-20
ENSG00000138468	SENP7	3	cg22561329	19	57346735	-9.02679131487682	2.67855617340819e-19
ENSG00000138468	SENP7	3	cg22634378	19	37742834	-7.23365544436575	5.59771303774957e-13
ENSG00000138468	SENP7	3	cg22672060	4	156464550	7.9979503776969	1.63823711972878e-15
ENSG00000138468	SENP7	3	cg22682154	19	57683164	-7.6810930035501	1.96676326578448e-14
ENSG00000138468	SENP7	3	cg22685966	19	38183418	-8.61554008212137	9.83952003900386e-18
ENSG00000138468	SENP7	3	cg22720041	19	44952725	-9.38932408678862	9.80817002220326e-21
ENSG00000138468	SENP7	3	cg22720790	19	58716032	9.82323707861079	1.59591590760169e-22
ENSG00000138468	SENP7	3	cg22797884	19	37800967	-8.92284852664275	6.75974356267925e-19
ENSG00000138468	SENP7	3	cg23010048	19	52391257	-9.98928018323731	3.15237712111321e-23
ENSG00000138468	SENP7	3	cg23029635	19	57904254	7.94883236955816	2.42315910171494e-15
ENSG00000138468	SENP7	3	cg23054584	19	36822311	-9.51161036297722	3.12732042377981e-21
ENSG00000138468	SENP7	3	cg23063647	4	206339	7.40321504201808	1.6090119862205e-13
ENSG00000138468	SENP7	3	cg23372544	19	23387068	7.80224808875643	7.68916364461761e-15
ENSG00000138468	SENP7	3	cg23397578	19	37742925	-7.29263224463434	3.63930203141759e-13
ENSG00000138468	SENP7	3	cg23405218	19	38183456	-9.64295608135387	9.02177735833005e-22
ENSG00000138468	SENP7	3	cg23448505	19	37826008	-11.2768499681354	4.62351596107647e-29
ENSG00000138468	SENP7	3	cg23854009	19	58111128	-7.37561833229729	1.97463246428173e-13
ENSG00000138468	SENP7	3	cg23891996	19	9517858	-7.50936090914722	7.2712574528541e-14
ENSG00000138468	SENP7	3	cg24027100	19	36822549	-15.7967816968724	1.36915409871616e-54
ENSG00000138468	SENP7	3	cg24124798	19	58400275	-9.47901761916605	4.24686494129777e-21
ENSG00000138468	SENP7	3	cg24189904	19	9473781	-8.42462342840586	4.96867234018069e-17
ENSG00000138468	SENP7	3	cg24192482	19	58111769	-7.7216573468095	1.4383310573815e-14
ENSG00000138468	SENP7	3	cg24214260	19	58193221	-17.8494081832226	1.19058604965049e-68
ENSG00000138468	SENP7	3	cg24368848	19	58545160	-8.32059744207852	1.18359349726436e-16
ENSG00000138468	SENP7	3	cg24413918	19	58516100	-12.1865039003654	1.41628548696769e-33
ENSG00000138468	SENP7	3	cg24680320	19	37803573	-7.21038704486684	6.62816370413376e-13
ENSG00000138468	SENP7	3	cg24794228	19	52391166	-11.7275462397039	2.94312448728793e-31
ENSG00000138468	SENP7	3	cg24834889	19	37825406	-13.2143178070751	4.64206148637883e-39
ENSG00000138468	SENP7	3	cg24871714	19	37095466	-7.66957221747557	2.14894256046095e-14
ENSG00000138468	SENP7	3	cg25361961	19	58070048	-19.3379872149499	9.39042570732834e-80
ENSG00000138468	SENP7	3	cg25400396	19	58400559	-23.5954019565503	1.99864015689477e-115
ENSG00000138468	SENP7	3	cg25404914	19	20607771	-9.20043323358357	5.57905232539973e-20
ENSG00000138468	SENP7	3	cg25465322	19	44860658	-7.20488681283841	6.89774441212485e-13
ENSG00000138468	SENP7	3	cg25537993	19	58545182	-11.8465284400364	7.5130425953761e-32
ENSG00000138468	SENP7	3	cg25546901	19	37288509	-6.84155117074492	9.01407910806818e-12
ENSG00000138468	SENP7	3	cg25763393	19	52956832	-7.16588874002204	9.14346786678413e-13
ENSG00000138468	SENP7	3	cg25772438	19	37329517	-7.44589862834671	1.17058282730135e-13
ENSG00000138468	SENP7	3	cg26263766	19	58739734	-11.6964793886677	4.19503248943711e-31
ENSG00000138468	SENP7	3	cg26356061	19	58446960	-17.4142874517297	1.51123347385526e-65
ENSG00000138468	SENP7	3	cg26465391	19	58220773	-18.4490763680927	4.92601493137178e-73
ENSG00000138468	SENP7	3	cg26662727	19	57947642	-9.30577915659999	2.12460307346273e-20
ENSG00000138468	SENP7	3	cg26671652	19	58446312	-8.61739603221359	9.68422094849013e-18
ENSG00000138468	SENP7	3	cg26698460	19	58716004	9.13489834089389	1.01189793916889e-19
ENSG00000138468	SENP7	3	cg26713179	19	52772371	-9.2213211307947	4.61084748465554e-20
ENSG00000138468	SENP7	3	cg26734888	19	37825307	-9.21217958793203	5.01222707445459e-20
ENSG00000138468	SENP7	3	cg26798850	19	37064886	-6.85040520653774	8.47940429961393e-12
ENSG00000138468	SENP7	3	cg27046034	19	58280801	-9.49094531322466	3.79737148757261e-21
ENSG00000138468	SENP7	3	cg27049766	19	58220516	-21.6326337817621	2.75897344013324e-98
ENSG00000138468	SENP7	3	cg27089125	19	52873426	-7.21754998619612	6.2925517962335e-13
ENSG00000138468	SENP7	3	cg27105390	19	23253316	-7.49087066663952	8.35661640376346e-14
ENSG00000138468	SENP7	3	cg27112264	19	58400504	-19.0378684334561	1.8656895152798798e-77
ENSG00000138468	SENP7	3	cg27199827	20	18567975	7.79808847997505	7.94295339693778e-15
ENSG00000138468	SENP7	3	cg27324426	19	58220837	-20.2535235317507	6.02584243968173e-87
ENSG00000138468	SENP7	3	cg27353143	19	38308057	-9.34562784639268	1.47066259860478e-20
ENSG00000138468	SENP7	3	cg27371091	19	58145084	-7.92526279988499	2.92153053205648e-15
ENSG00000138468	SENP7	3	cg27389185	19	38042123	-8.80964703801416	1.83147891527289e-18
ENSG00000138468	SENP7	3	cg27391267	19	58545333	-7.95690606406258	2.2725068270750502e-15
ENSG00000164054	SHISA5	3	cg04415434	3	126423069	7.20369449601142	6.95758768626249e-13
ENSG00000225697	SLC26A6	3	cg21582582	3	182698605	-11.8054617099136	1.20533961482063e-31
ENSG00000225697	SLC26A6	3	cg21665057	3	196295764	-13.1499237488622	1.05235509728986e-38
ENSG00000114544	SLC41A3	3	cg01886893	5	102089360	-13.1780480282879	7.36396139618775e-39
ENSG00000114544	SLC41A3	3	cg15753593	2	159726728	8.0956328895762	7.47064784681791e-16
ENSG00000163959	SLC51A	3	cg27137576	6	31922361	-17.551983439483	1.60045623549862e-66
ENSG00000181804	SLC9A9	3	cg16899991	3	127868625	-10.4597808228206	2.7735233695737e-25
ENSG00000173473	SMARCC1	3	cg03492460	6	88441469	-8.73809702960723	3.4176507719271e-18
ENSG00000114520	SNX4	3	cg02560186	11	3602584	-13.3855387245012	5.17530616314549e-40
ENSG00000114520	SNX4	3	cg15753593	2	159726728	17.2347833770527	2.75820600556254e-64
ENSG00000144455	SUMF1	3	cg05386570	7	99177695	-7.15632494306399	9.79565971444744e-13
ENSG00000171148	TADA3	3	cg06869407	7	111846526	-23.9912438252514	5.09379883543609e-119
ENSG00000179152	TCAIM	3	cg01775379	2	159316264	7.9506494364779	2.38841784696105e-15
ENSG00000179152	TCAIM	3	cg10821830	2	79823717	-8.55922865580491	1.59199829782536e-17
ENSG00000179152	TCAIM	3	cg10860819	12	40619282	6.93851865197462	4.59546633159387e-12
ENSG00000179152	TCAIM	3	cg11070059	7	96626399	8.20836972850256	2.98504168444521e-16
ENSG00000179152	TCAIM	3	cg16513984	1	12261884	8.38231613914707	7.08078312005351e-17
ENSG00000072274	TFRC	3	cg03360716	7	86596636	-12.6371407916475	6.25671150691875e-36
ENSG00000072274	TFRC	3	cg27137576	6	31922361	-11.4636072992595	5.81520870454181e-30
ENSG00000145107	TM4SF19	3	cg27137576	6	31922361	8.02343030949636	1.33597722605357e-15
ENSG00000126062	TMEM115	3	cg06241380	16	67595954	-6.94485815715581	4.39608472247354e-12
ENSG00000169964	TMEM42	3	cg00981877	20	50366841	6.87661767591116	7.07224051342343e-12
ENSG00000061938	TNK2	3	cg04481584	5	231809	8.31788960624819	1.21047629176815e-16
ENSG00000213689	TREX1	3	cg03492460	6	88441469	7.74338067675542	1.21564759668757e-14
ENSG00000213689	TREX1	3	cg04415434	3	126423069	7.55597075649501	5.11305477879858e-14
ENSG00000214021	TTLL3	3	cg06869407	7	111846526	-10.8546547398993	4.467272534773e-27
ENSG00000182179	UBA7	3	cg10075733	9	94495746	17.6070272633662	6.49565638069169e-67
ENSG00000182179	UBA7	3	cg14021345	14	42076757	-7.56201928387374	4.88393369416483e-14
ENSG00000182179	UBA7	3	cg21574349	3	185080951	-25.0275562528942	1.22812413265536e-128
ENSG00000182179	UBA7	3	cg21582582	3	182698605	-51.9899139910844	0
ENSG00000182179	UBA7	3	cg21665057	3	196295764	-60.520209624753	0
ENSG00000163960	UBXN7	3	cg27137576	6	31922361	7.35171349743361	2.35648343919709e-13
ENSG00000144560	VGLL4	3	cg17076431	6	49901607	16.2777500162264	9.4414865118035e-58
ENSG00000156931	VPS8	3	cg08549326	7	116617896	-8.41879839813505	5.2175299016146e-17
ENSG00000178252	WDR6	3	cg16110400	11	106188289	6.95363574462101	4.13396485670638e-12
ENSG00000178252	WDR6	3	cg21582582	3	182698605	-10.6576455558444	3.56701165562443e-26
ENSG00000178252	WDR6	3	cg21665057	3	196295764	-10.477791110079	2.30460633293106e-25
ENSG00000177311	ZBTB38	3	cg00685614	16	89118838	8.45060986870173	3.99379688005916e-17
ENSG00000177311	ZBTB38	3	cg00926657	17	79880822	7.86321528716534	4.76828789451153e-15
ENSG00000177311	ZBTB38	3	cg00994936	19	1423902	8.01431745422923	1.43717329101241e-15
ENSG00000177311	ZBTB38	3	cg01561259	17	78560781	8.04062084016954	1.16382806377602e-15
ENSG00000177311	ZBTB38	3	cg01964856	16	1034270	7.23842631917618	5.40675974912565e-13
ENSG00000177311	ZBTB38	3	cg02470690	6	27839548	11.6533661353553	6.85055156690898e-31
ENSG00000177311	ZBTB38	3	cg02715602	19	4544446	7.18500020565381	7.96532439242672e-13
ENSG00000177311	ZBTB38	3	cg03216966	7	733282	7.82876445804851	6.24900345319554e-15
ENSG00000177311	ZBTB38	3	cg03569283	8	142222314	8.88875834278704	9.13762278154851e-19
ENSG00000177311	ZBTB38	3	cg03711457	11	113746831	9.93840099879462	5.19569219533933e-23
ENSG00000177311	ZBTB38	3	cg04486919	7	2117171	9.3137672658628	1.9737966657508e-20
ENSG00000177311	ZBTB38	3	cg04519550	16	89349466	7.3393013967477	2.58248314741563e-13
ENSG00000177311	ZBTB38	3	cg04890576	17	73032613	7.83395089901324	6.00012590776122e-15
ENSG00000177311	ZBTB38	3	cg04905201	16	89119709	6.89130455578179	6.38670953607601e-12
ENSG00000177311	ZBTB38	3	cg05350293	16	89119002	8.25699993532357	2.00214425260522e-16
ENSG00000177311	ZBTB38	3	cg06008435	6	25027714	11.7250140094985	3.02948717186361e-31
ENSG00000177311	ZBTB38	3	cg06191068	17	76989451	7.07166358037883	1.79589505711466e-12
ENSG00000177311	ZBTB38	3	cg06351481	14	24642219	6.8547832515687	8.22663652334522e-12
ENSG00000177311	ZBTB38	3	cg06657721	6	25027618	7.83332182968388	6.02978443623815e-15
ENSG00000177311	ZBTB38	3	cg06911187	17	80988709	7.35893538959471	2.2340538437652e-13
ENSG00000177311	ZBTB38	3	cg07007035	7	1776076	7.20149461364182	7.06934251132826e-13
ENSG00000177311	ZBTB38	3	cg07139527	17	80969525	6.95288088329091	4.1558908037835e-12
ENSG00000177311	ZBTB38	3	cg07173823	1	45190519	8.8855059793557	9.40367112152162e-19
ENSG00000177311	ZBTB38	3	cg07675998	11	64268315	12.4350829530939	7.27548412543829e-35
ENSG00000177311	ZBTB38	3	cg07721547	22	42475119	8.73448424163869	3.52657081092032e-18
ENSG00000177311	ZBTB38	3	cg08040471	17	80407779	6.99787752369691	3.02909059912267e-12
ENSG00000177311	ZBTB38	3	cg08301181	17	73780373	7.30092621348915	3.42457549872235e-13
ENSG00000177311	ZBTB38	3	cg08362283	16	89119663	7.40791241064197	1.55378709155018e-13
ENSG00000177311	ZBTB38	3	cg08810397	16	1521676	6.80835313076709	1.13293682029606e-11
ENSG00000177311	ZBTB38	3	cg09658497	7	2847517	7.62360033658198	3.05635400284359e-14
ENSG00000177311	ZBTB38	3	cg09697999	7	733198	8.86065496975322	1.17056101806817e-18
ENSG00000177311	ZBTB38	3	cg09780964	16	89119135	7.84148114200262	5.65606021125429e-15
ENSG00000177311	ZBTB38	3	cg09848638	7	733065	7.11213980263037	1.34521183043125e-12
ENSG00000177311	ZBTB38	3	cg09929238	17	78560916	7.23068160993355	5.72007502032986e-13
ENSG00000177311	ZBTB38	3	cg10975863	14	68830704	10.8068831983819	7.41710001191083e-27
ENSG00000177311	ZBTB38	3	cg11382082	5	43038611	7.88860736309891	3.9037918470051e-15
ENSG00000177311	ZBTB38	3	cg11742202	6	74364667	7.49259563820702	8.24896883449321e-14
ENSG00000177311	ZBTB38	3	cg12144681	8	142220329	10.0754669831071	1.34488365897479e-23
ENSG00000177311	ZBTB38	3	cg13599248	6	74364700	7.74522888506287	1.19834989491222e-14
ENSG00000177311	ZBTB38	3	cg13733787	8	141229379	6.8849959238992	6.67279965951186e-12
ENSG00000177311	ZBTB38	3	cg13803234	14	68830813	9.34608641238673	1.46443738423394e-20
ENSG00000177311	ZBTB38	3	cg14004921	9	140023416	8.85390920284864	1.24212349734648e-18
ENSG00000177311	ZBTB38	3	cg14185922	9	130615188	8.58502537898511	1.27753263144335e-17
ENSG00000177311	ZBTB38	3	cg14398883	7	101398184	9.82159723269846	1.62147941245075e-22
ENSG00000177311	ZBTB38	3	cg14823389	7	101398152	9.68079524535206	6.28745868473524e-22
ENSG00000177311	ZBTB38	3	cg16325482	17	76989499	7.62564189796097	3.00904285321042e-14
ENSG00000177311	ZBTB38	3	cg16337457	17	76989680	8.49932285847922	2.64750821475615e-17
ENSG00000177311	ZBTB38	3	cg16783204	16	89119371	6.81322903381574	1.095599617899e-11
ENSG00000177311	ZBTB38	3	cg16815625	8	141229477	8.94646151924028	5.4825576336985e-19
ENSG00000177311	ZBTB38	3	cg17812120	8	144639478	6.81269129847013	1.09965741967848e-11
ENSG00000177311	ZBTB38	3	cg18034295	22	42475135	9.12510337710054	1.10569470734417e-19
ENSG00000177311	ZBTB38	3	cg18094999	11	113746795	10.3396984774013	9.46317309705234e-25
ENSG00000177311	ZBTB38	3	cg18446336	7	2847575	8.55452014421977	1.65713295053626e-17
ENSG00000177311	ZBTB38	3	cg18576206	22	44392384	8.84942180396714	1.29210469042672e-18
ENSG00000177311	ZBTB38	3	cg19338056	9	14992172	12.300942945119	3.63543034537033e-34
ENSG00000177311	ZBTB38	3	cg19717773	7	2847554	8.21377258089187	2.85579447174539e-16
ENSG00000177311	ZBTB38	3	cg20032370	17	80251467	6.83651446200868	9.33283630213164e-12
ENSG00000177311	ZBTB38	3	cg20510084	17	80982156	6.93296628732402	4.77735719297247e-12
ENSG00000177311	ZBTB38	3	cg21771528	5	18745861	16.0188938093612	4.86171114699559e-56
ENSG00000177311	ZBTB38	3	cg21806580	5	18746010	18.9598278616974	7.30382413522903e-77
ENSG00000177311	ZBTB38	3	cg21995347	5	53814891	7.88270092623154	4.08995267388578e-15
ENSG00000177311	ZBTB38	3	cg22040809	6	26522578	7.37514179903369	1.98161418084513e-13
ENSG00000177311	ZBTB38	3	cg22114489	7	101398177	10.2495326286785	2.35769175212994e-24
ENSG00000177311	ZBTB38	3	cg22488164	12	14716910	8.58771109628602	1.24855176983191e-17
ENSG00000177311	ZBTB38	3	cg23039807	2	240425897	6.87854830198135	6.97816747496232e-12
ENSG00000177311	ZBTB38	3	cg24709951	17	73033009	6.89869557089417	6.06680822914238e-12
ENSG00000177311	ZBTB38	3	cg24994319	6	25027586	10.5688467191954	8.99431667338248e-26
ENSG00000177311	ZBTB38	3	cg25355213	17	73780246	8.14766066429757	4.89933667571759e-16
ENSG00000177311	ZBTB38	3	cg26066277	17	79792777	9.2907026454197	2.44094049015463e-20
ENSG00000177311	ZBTB38	3	cg26332052	17	73780035	8.03458473217865	1.22162755477145e-15
ENSG00000177311	ZBTB38	3	cg26547058	8	142243143	8.50829057581626	2.45393328737081e-17
ENSG00000177311	ZBTB38	3	cg26824091	6	38670437	10.5842631838661	7.66405872789942e-26
ENSG00000177311	ZBTB38	3	cg27381584	17	80407749	8.31154205983368	1.27587661858052e-16
ENSG00000177311	ZBTB38	3	cg27478579	2	55497012	9.26911527068659	2.97652265998609e-20
ENSG00000196345	ZKSCAN7	3	cg00981877	20	50366841	9.55952523873097	1.99079375331155e-21
ENSG00000196345	ZKSCAN7	3	cg01775379	2	159316264	7.67321713027914	2.08957897477771e-14
ENSG00000196345	ZKSCAN7	3	cg16513984	1	12261884	13.1841255549123	6.81657614818582e-39
ENSG00000196345	ZKSCAN7	3	cg26675329	2	103033753	10.9028887827954	2.67181071404536e-27
ENSG00000172667	ZMAT3	3	cg03818034	7	99746088	-9.61001959775237	1.23402397653127e-21
ENSG00000186448	ZNF197	3	cg00981877	20	50366841	15.8239700758028	9.11911253663787e-55
ENSG00000186448	ZNF197	3	cg01775379	2	159316264	12.6760042335438	3.88696613428173e-36
ENSG00000186448	ZNF197	3	cg03617420	8	10916666	8.72914566353755	3.6938251791612e-18
ENSG00000186448	ZNF197	3	cg07196577	1	109850486	12.8351150962397	5.4599320478491e-37
ENSG00000186448	ZNF197	3	cg12075928	8	141801307	9.90622432540721	7.11781559471377e-23
ENSG00000186448	ZNF197	3	cg13814396	2	65090621	7.15167435522215	1.01290953853398e-12
ENSG00000186448	ZNF197	3	cg14467281	9	33044611	7.81834619568818	6.7800485467024e-15
ENSG00000186448	ZNF197	3	cg15735417	7	1263551	6.90657667775784	5.74300007060081e-12
ENSG00000186448	ZNF197	3	cg16513984	1	12261884	17.3952628026625	2.05844085928574e-65
ENSG00000186448	ZNF197	3	cg20438915	2	159317294	7.91620723181599	3.13876365885859e-15
ENSG00000186448	ZNF197	3	cg21180572	9	33043903	6.79540336310202	1.23825843285621e-11
ENSG00000186448	ZNF197	3	cg23245063	14	100154773	-9.64273332882223	9.04093943578368e-22
ENSG00000186448	ZNF197	3	cg26675329	2	103033753	15.8810554381007	3.87708411208929e-55
ENSG00000186448	ZNF197	3	cg26915329	13	60033345	7.30302722903189	3.37218803932956e-13
ENSG00000169981	ZNF35	3	cg00981877	20	50366841	7.64759260176579	2.54374379871748e-14
ENSG00000169981	ZNF35	3	cg01775379	2	159316264	7.53799231301743	5.85833107257367e-14
ENSG00000169981	ZNF35	3	cg14467281	9	33044611	7.33955411469759	2.57767595987921e-13
ENSG00000169981	ZNF35	3	cg16513984	1	12261884	9.33340629099332	1.64657184589087e-20
ENSG00000169981	ZNF35	3	cg17586885	6	166259959	7.22878973546225	5.79928164685018e-13
ENSG00000169981	ZNF35	3	cg20418529	6	166260012	7.91912677272248	3.06704400706087e-15
ENSG00000169981	ZNF35	3	cg23245063	14	100154773	-8.00227516100322	1.58256248061373e-15
ENSG00000169981	ZNF35	3	cg26675329	2	103033753	12.1823304545174	1.48796770441784e-33
ENSG00000186446	ZNF501	3	cg00981877	20	50366841	11.9201815228392	3.20613282850701e-32
ENSG00000186446	ZNF501	3	cg01775379	2	159316264	11.0345044212184	6.50128231592333e-28
ENSG00000186446	ZNF501	3	cg07196577	1	109850486	8.27795910873783	1.68438377218147e-16
ENSG00000186446	ZNF501	3	cg13814396	2	65090621	7.72708686436215	1.37917243965763e-14
ENSG00000186446	ZNF501	3	cg14467281	9	33044611	8.60408655381613	1.08537932671308e-17
ENSG00000186446	ZNF501	3	cg15735417	7	1263551	7.2062690196007	6.8290028586164e-13
ENSG00000186446	ZNF501	3	cg16513984	1	12261884	14.1181238014449	3.2559908709521e-44
ENSG00000186446	ZNF501	3	cg21180572	9	33043903	7.26309617940147	4.51693460080361e-13
ENSG00000186446	ZNF501	3	cg23245063	14	100154773	-10.0376084316268	1.95684314668059e-23
ENSG00000186446	ZNF501	3	cg26675329	2	103033753	14.1428224475038	2.33098042510093e-44
ENSG00000186446	ZNF501	3	cg26915329	13	60033345	7.38656398365817	1.82075957796975e-13
ENSG00000196653	ZNF502	3	cg00981877	20	50366841	13.2554108674014	2.74825761019015e-39
ENSG00000196653	ZNF502	3	cg01775379	2	159316264	12.2438996314171	7.17093267874213e-34
ENSG00000196653	ZNF502	3	cg03617420	8	10916666	7.01361300119549	2.71071316558949e-12
ENSG00000196653	ZNF502	3	cg07196577	1	109850486	9.68350261042804	6.12679014558738e-22
ENSG00000196653	ZNF502	3	cg12075928	8	141801307	7.68639389915834	1.88813025418824e-14
ENSG00000196653	ZNF502	3	cg13814396	2	65090621	7.56242425871089	4.86895901189396e-14
ENSG00000196653	ZNF502	3	cg14467281	9	33044611	8.67617941254593	5.84126148604685e-18
ENSG00000196653	ZNF502	3	cg15735417	7	1263551	7.36485720527517	2.13834660569385e-13
ENSG00000196653	ZNF502	3	cg16513984	1	12261884	15.5490641584865	5.39888243354445e-53
ENSG00000196653	ZNF502	3	cg20438915	2	159317294	7.42105919129128	1.4089402929792e-13
ENSG00000196653	ZNF502	3	cg21180572	9	33043903	7.1766581291432	8.46001761801248e-13
ENSG00000196653	ZNF502	3	cg23245063	14	100154773	-10.3595534252363	7.73218898924681e-25
ENSG00000196653	ZNF502	3	cg26675329	2	103033753	14.4784848997575	2.35773046439163e-46
ENSG00000196653	ZNF502	3	cg26915329	13	60033345	7.17927370326115	8.30175075081558e-13
ENSG00000164048	ZNF589	3	cg03492460	6	88441469	7.65103462056585	2.4775113607137e-14
ENSG00000164048	ZNF589	3	cg14862260	6	31860279	10.3858415834723	5.9142597684343e-25
ENSG00000177873	ZNF619	3	cg01882498	4	83934956	19.0206987351479	2.5200843972981e-77
ENSG00000177873	ZNF619	3	cg02797201	11	62526262	-7.04135680460181	2.22741960112163e-12
ENSG00000227124	ZNF717	3	cg03844506	4	4109441	8.82494870573715	1.60174292904574e-18
ENSG00000178917	ZNF852	3	cg10821830	2	79823717	-10.6024014089328	6.34683450359094e-26
ENSG00000178917	ZNF852	3	cg10860819	12	40619282	8.5927064682394	1.19636382122044e-17
ENSG00000178917	ZNF852	3	cg11070059	7	96626399	9.58880090989028	1.50913749727866e-21
ENSG00000178917	ZNF852	3	cg18335796	8	91094472	6.89267644837673	6.32610626568609e-12
ENSG00000178917	ZNF852	3	cg22240853	3	15373710	-7.04510509226445	2.16898204466343e-12
ENSG00000178917	ZNF852	3	cg26628907	17	38195238	7.03852479681757	2.27259380149567e-12
ENSG00000070476	ZXDC	3	cg21035471	17	77005669	-9.24235616777009	3.80399820429801e-20
ENSG00000170846	AC093323.3	4	cg17190766	12	72580292	-8.17373133925054	3.96197837193224e-16
ENSG00000196526	AFAP1	4	cg05984533	17	79479583	-10.3573230552398	7.90980444189533e-25
ENSG00000196526	AFAP1	4	cg10052190	16	22019676	-12.180792022859	1.51529119142448e-33
ENSG00000164039	BDH2	4	cg16471864	4	38666270	-11.0634684484816	4.75341998831391e-28
ENSG00000164096	C4orf3	4	cg00141295	7	56182960	9.72883183408267	3.96798905002665e-22
ENSG00000164096	C4orf3	4	cg13974601	11	50256574	9.6167260921031	1.15787124984554e-21
ENSG00000164096	C4orf3	4	cg22912922	17	19408817	-7.11217514583409	1.34487155488547e-12
ENSG00000164096	C4orf3	4	cg25214090	10	38739885	63.3761701479083	0
ENSG00000145241	CENPC	4	cg13848087	12	89893700	18.4543216252939	4.50420644823259e-73
ENSG00000145354	CISD2	4	cg16471864	4	38666270	-7.00361098531713	2.90904994562465e-12
ENSG00000179979	CRIPAK	4	cg00748938	14	94641781	-8.2072485485471809	3.01257654789068e-16
ENSG00000179979	CRIPAK	4	cg02020829	5	92908771	-9.96582337616996	3.97020030909591e-23
ENSG00000179979	CRIPAK	4	cg18232980	1	168106244	7.39609714752947	1.69638991259333e-13
ENSG00000179979	CRIPAK	4	cg22240333	15	37193333	-7.79266699852264	8.28614674446812e-15
ENSG00000159692	CTBP1	4	cg02013274	2	28614438	-6.92507444706981	5.04809094869682e-12
ENSG00000159692	CTBP1	4	cg02018101	14	64320521	-10.7688651183771	1.10873017272727e-26
ENSG00000159692	CTBP1	4	cg02020829	5	92908771	-16.3041809377718	6.29384740440459e-58
ENSG00000159692	CTBP1	4	cg04041669	11	8190690	7.09675283357193	1.50167117408011e-12
ENSG00000159692	CTBP1	4	cg15457005	11	11643754	7.49047287887948	8.38163584223081e-14
ENSG00000145476	CYP4V2	4	cg07700062	1	236767390	-36.2404475496447	3.03758223045511e-249
ENSG00000070190	DAPP1	4	cg27331863	15	66062176	8.97246770134153	4.3506877110527e-19
ENSG00000145214	DGKQ	4	cg01749555	17	80709803	-10.0400846589314	1.90950372109132e-23
ENSG00000145214	DGKQ	4	cg07976860	16	67281332	14.6554772683769	2.01241361736199e-47
ENSG00000145214	DGKQ	4	cg08136276	4	83351514	-12.8208603459989	6.51554308838674e-37
ENSG00000145214	DGKQ	4	cg09821533	6	13712174	-12.2350221384777	7.96848723143244e-34
ENSG00000145214	DGKQ	4	cg12575136	18	32820987	8.07149035739443	9.07828727028449e-16
ENSG00000145214	DGKQ	4	cg15457005	11	11643754	-9.70792714705639	4.84930062766886e-22
ENSG00000145214	DGKQ	4	cg18232980	1	168106244	14.7094467393322	9.45192922035791e-48
ENSG00000145214	DGKQ	4	cg20822818	11	119235062	-13.6291380974875	2.18429587293684e-41
ENSG00000145214	DGKQ	4	cg21249729	9	138392748	-12.2142430424745	1.01966905155441e-33
ENSG00000109381	ELF2	4	cg00691240	1	52498502	11.4933331800823	4.16860096948429e-30
ENSG00000109381	ELF2	4	cg05516272	11	66311334	-6.78803817527601	1.30237931640202e-11
ENSG00000109381	ELF2	4	cg06643849	19	57742421	7.36222619648912	2.18036049501784e-13
ENSG00000109381	ELF2	4	cg07977202	11	66311348	-7.23400878335465	5.58334646412843e-13
ENSG00000109381	ELF2	4	cg08855861	1	52498679	10.4967491421688	1.89578908935531e-25
ENSG00000109381	ELF2	4	cg15758008	5	4866318	9.40739440424151	8.29107402884135e-21
ENSG00000109381	ELF2	4	cg18644286	19	57742255	7.07689204990132	1.73024946653016e-12
ENSG00000109381	ELF2	4	cg19603903	19	57742345	7.34979702739686	2.39006446656771e-13
ENSG00000109381	ELF2	4	cg19841649	5	4866322	9.5617584228593	1.94922488852345e-21
ENSG00000109381	ELF2	4	cg22711741	19	57742444	8.15256154487532	4.70783806234047e-16
ENSG00000109381	ELF2	4	cg23371413	19	57742394	6.85080112984275	8.45623595110565e-12
ENSG00000109381	ELF2	4	cg25432232	19	57742423	7.38448062481736	1.8491095672504e-13
ENSG00000109381	ELF2	4	cg25592564	5	4866442	7.99149660805748	1.72492587204926e-15
ENSG00000109381	ELF2	4	cg25802888	19	57742112	7.13414421660314	1.14891313336314e-12
ENSG00000171503	ETFDH	4	cg16792258	2	239631449	7.5164091650633	6.89510591242975e-14
ENSG00000163322	FAM175A	4	cg13633941	7	26284736	-8.14304796312755	5.08658049674115e-16
ENSG00000127418	FGFRL1	4	cg01799862	16	67143802	7.78606649980712	8.72372763961655e-15
ENSG00000127418	FGFRL1	4	cg09821533	6	13712174	10.1576353441764	5.93228981432379e-24
ENSG00000127418	FGFRL1	4	cg15457005	11	11643754	14.3514326365817	1.35694192787066e-45
ENSG00000127418	FGFRL1	4	cg17687970	8	22462467	8.36835161291429	7.95610424616593e-17
ENSG00000127418	FGFRL1	4	cg18232980	1	168106244	-14.4695317320688	2.66839827973819e-46
ENSG00000127418	FGFRL1	4	cg20693608	4	113152836	7.6565413395759	2.37506192481668e-14
ENSG00000127418	FGFRL1	4	cg20822818	11	119235062	14.2855332845454	3.34529681712777e-45
ENSG00000127418	FGFRL1	4	cg21249729	9	138392748	12.5384983839618	2.08198451259334e-35
ENSG00000109536	FRG1	4	cg03435771	12	38595601	8.68750235944027	5.29729486900603e-18
ENSG00000109536	FRG1	4	cg05369274	7	55639575	9.22004986150831	4.66470172501563e-20
ENSG00000109536	FRG1	4	cg07070341	4	121844174	11.9935451572048	1.36618108763523e-32
ENSG00000109536	FRG1	4	cg12894917	11	9286517	-7.18393160222621	8.02707101559122e-13
ENSG00000109536	FRG1	4	cg20027314	12	108258022	-6.85386287154604	8.27915425326692e-12
ENSG00000109536	FRG1	4	cg25456927	18	12308339	-10.4485802709323	3.11163976595251e-25
ENSG00000178950	GAK	4	cg01799862	16	67143802	10.9624259464846	1.41250936450438e-27
ENSG00000178950	GAK	4	cg07636117	2	237072957	7.89630182305541	3.67374537077795e-15
ENSG00000178950	GAK	4	cg09821533	6	13712174	14.9185558567364	4.94057587446341e-49
ENSG00000178950	GAK	4	cg15457005	11	11643754	20.6983232356093	1.54237841369848e-90
ENSG00000178950	GAK	4	cg17687970	8	22462467	12.6487936560059	5.42524150478675e-36
ENSG00000178950	GAK	4	cg20693608	4	113152836	11.1799271412001	1.33929790644441e-28
ENSG00000178950	GAK	4	cg20822818	11	119235062	24.3079020593659	6.31114410405562e-122
ENSG00000178950	GAK	4	cg21249729	9	138392748	21.0772381577967	1.19952922141349e-93
ENSG00000109519	GRPEL1	4	cg07817883	1	32538562	-18.1773332257781	4.94225112910152e-71
ENSG00000164032	H2AFZ	4	cg27331863	15	66062176	17.0536112732652	5.03832323423367e-63
ENSG00000198189	HSD17B11	4	cg00130528	2	175189039	15.4078838489938	4.28449257976735e-52
ENSG00000170509	HSD17B13	4	cg00130528	2	175189039	-11.5859687036377	1.46971907881429e-30
ENSG00000127415	IDUA	4	cg01749555	17	80709803	-11.8546418357327	6.84194024382586e-32
ENSG00000127415	IDUA	4	cg01799862	16	67143802	-13.2564697560655	2.71133256453828e-39
ENSG00000127415	IDUA	4	cg02698600	1	201450009	-8.51527314302938	2.31294356675386e-17
ENSG00000127415	IDUA	4	cg07636117	2	237072957	-8.78849683122335	2.20345128115024e-18
ENSG00000127415	IDUA	4	cg07976860	16	67281332	11.2258091498827	8.10357665200547e-29
ENSG00000127415	IDUA	4	cg08136276	4	83351514	-12.0959829987262	4.118383314643e-33
ENSG00000127415	IDUA	4	cg09821533	6	13712174	-14.9768126497964	2.15690976109291e-49
ENSG00000127415	IDUA	4	cg13631105	18	29599349	-7.73811374470747	1.26630125132439e-14
ENSG00000127415	IDUA	4	cg15457005	11	11643754	-22.110107081857	2.38443298853842e-102
ENSG00000127415	IDUA	4	cg17687970	8	22462467	-13.3798795757645	5.56678206959201e-40
ENSG00000127415	IDUA	4	cg18232980	1	168106244	11.1128738482971	2.78147501706617e-28
ENSG00000127415	IDUA	4	cg20693608	4	113152836	-12.6417862851471	5.91105128136896e-36
ENSG00000127415	IDUA	4	cg20822818	11	119235062	-22.2872546796991	7.11580188461128e-104
ENSG00000127415	IDUA	4	cg21249729	9	138392748	-17.9266291580823	3.29745369631235e-69
ENSG00000169429	IL8	4	cg23097035	7	28396164	-9.05755031230887	2.03279934940022e-19
ENSG00000164344	KLKB1	4	cg07700062	1	236767390	6.88550496431312	6.64925666148865e-12
ENSG00000109270	LAMTOR3	4	cg27331863	15	66062176	16.9075122732603	5.14465728773806e-62
ENSG00000090316	MAEA	4	cg00474080	6	30923243	9.38909367172078	9.82918868049398e-21
ENSG00000090316	MAEA	4	cg02020829	5	92908771	8.35565836170538	8.84387698715076e-17
ENSG00000109323	MANBA	4	cg00499237	2	97169033	7.7524490594908	1.13306675146772e-14
ENSG00000109323	MANBA	4	cg03929796	3	52231840	8.38495950693281	6.92612914419446e-17
ENSG00000109323	MANBA	4	cg11012543	3	52231691	6.90820270068404	5.67833258103338e-12
ENSG00000109323	MANBA	4	cg12428160	10	44500693	7.7558825031416	1.10326322726872e-14
ENSG00000109323	MANBA	4	cg16471864	4	38666270	17.4563132803279	7.62820205569988e-66
ENSG00000109323	MANBA	4	cg22322277	6	75459158	9.31872002669099	1.88566367628368e-20
ENSG00000164024	METAP1	4	cg12403253	6	26598502	15.9124893190413	2.41807299859258e-55
ENSG00000145388	METTL14	4	cg24350395	1	243288625	-14.1419971997793	2.35717574676815e-44
ENSG00000145388	METTL14	4	cg26518628	1	97050305	17.4831587030965	4.92540186780809e-66
ENSG00000169026	MFSD7	4	cg01749555	17	80709803	8.3521214474452	9.10820104928832e-17
ENSG00000169026	MFSD7	4	cg03853134	2	122494799	-29.2922554638967	3.38836877144295e-171
ENSG00000169026	MFSD7	4	cg06377929	1	1407001	-7.62092090814717	3.11955914888801e-14
ENSG00000169026	MFSD7	4	cg11951449	1	116519025	-9.60145670860433	1.33849904998021e-21
ENSG00000169026	MFSD7	4	cg12575136	18	32820987	-52.6805840616337	0
ENSG00000169026	MFSD7	4	cg26903090	16	3019041	-15.3790218228276	6.53006801912805e-52
ENSG00000215375	MYL5	4	cg03853134	2	122494799	-12.6842360012295	3.51355972451237e-36
ENSG00000215375	MYL5	4	cg11105585	21	45759228	8.17499589638425	3.92131456309541e-16
ENSG00000215375	MYL5	4	cg12575136	18	32820987	-19.4773662583056	7.85786992256628e-81
ENSG00000215375	MYL5	4	cg19759883	12	14956454	7.41112172733494	1.51713228295671e-13
ENSG00000215375	MYL5	4	cg26903090	16	3019041	-7.0970524899133	1.49846012537388e-12
ENSG00000215375	MYL5	4	cg27438889	10	123922704	7.96549908846151	2.12229676333852e-15
ENSG00000109320	NFKB1	4	cg00320216	11	128450029	-7.13552975702674	1.13754116007209e-12
ENSG00000109320	NFKB1	4	cg00331027	5	80521615	-10.1484238450802	6.50437272278457e-24
ENSG00000109320	NFKB1	4	cg00499237	2	97169033	-24.1105368567823	4.12343702882858e-120
ENSG00000109320	NFKB1	4	cg00580497	5	1153746	-9.38329822996356	1.03727589805016e-20
ENSG00000109320	NFKB1	4	cg00730373	16	89050488	-11.9895298545734	1.43165641816101e-32
ENSG00000109320	NFKB1	4	cg01020263	16	50732073	-9.47439301786799	4.43496886831413e-21
ENSG00000109320	NFKB1	4	cg01037823	16	2879998	-7.3796435180059	1.91661573020786e-13
ENSG00000109320	NFKB1	4	cg01127300	22	38614796	-11.3870830548177	1.36508547228691e-29
ENSG00000109320	NFKB1	4	cg01156844	15	85520317	-9.00194794549254	3.34492790467036e-19
ENSG00000109320	NFKB1	4	cg01211283	8	22735276	-7.01044237105521	2.77210463715634e-12
ENSG00000109320	NFKB1	4	cg01243823	16	50732212	-7.37785346204296	1.94220674217501e-13
ENSG00000109320	NFKB1	4	cg01426713	6	106517533	-7.12459562524309	1.23037640187709e-12
ENSG00000109320	NFKB1	4	cg01476795	10	82362879	-8.76222301142854	2.77080349097148e-18
ENSG00000109320	NFKB1	4	cg01792616	16	4289562	-7.11405600982435	1.32688443417209e-12
ENSG00000109320	NFKB1	4	cg02086820	16	88698611	-7.11430678672738	1.3245041109606e-12
ENSG00000109320	NFKB1	4	cg02097120	1	154492952	-8.2032674083948	3.11238735047923e-16
ENSG00000109320	NFKB1	4	cg02222791	14	88621424	-8.62460793656346	9.10339450487636e-18
ENSG00000109320	NFKB1	4	cg02240252	17	47931591	-11.3579395969599	1.88666390084038e-29
ENSG00000109320	NFKB1	4	cg02371935	16	87521363	7.771754662974	9.75216959609501e-15
ENSG00000109320	NFKB1	4	cg02387843	4	9892887	-9.68390662788083	6.1031648383137e-22
ENSG00000109320	NFKB1	4	cg02539664	3	9025584	-8.1681355440239	4.14696714163897e-16
ENSG00000109320	NFKB1	4	cg02558476	16	2880326	-7.05529510868384	2.01761297316283e-12
ENSG00000109320	NFKB1	4	cg02867514	17	34207341	-8.13990887736746	5.21802177179467e-16
ENSG00000109320	NFKB1	4	cg03052004	6	11702389	-12.5214091661904	2.56185299357912e-35
ENSG00000109320	NFKB1	4	cg03055671	3	172231528	-10.4016037930571	5.03471481403567e-25
ENSG00000109320	NFKB1	4	cg03078551	17	41656298	-8.48341167130832	3.02874609383153e-17
ENSG00000109320	NFKB1	4	cg03113867	11	129920411	-9.82473216911314	1.57295698679157e-22
ENSG00000109320	NFKB1	4	cg03155159	16	59627519	-9.62412013599493	1.07929457340458e-21
ENSG00000109320	NFKB1	4	cg03292675	8	21912864	-10.959337628643	1.46010677634254e-27
ENSG00000109320	NFKB1	4	cg03332701	15	63793652	-6.79775899552405	1.21841113211465e-11
ENSG00000109320	NFKB1	4	cg03502889	11	34255733	-13.4075288253219	3.89732090346624e-40
ENSG00000109320	NFKB1	4	cg03796224	8	30383628	-6.8750950845268	7.14730721689367e-12
ENSG00000109320	NFKB1	4	cg03889450	4	10082415	-13.8231270684902	1.69301099284313e-42
ENSG00000109320	NFKB1	4	cg03929796	3	52231840	-19.8140857499905	1.84629019146942e-83
ENSG00000109320	NFKB1	4	cg03957124	6	37016869	-7.5399285233997	5.77319365402659e-14
ENSG00000109320	NFKB1	4	cg04011474	2	28904455	-8.00411922957119	1.5593939075733e-15
ENSG00000109320	NFKB1	4	cg04091113	16	85576555	-9.62383856078034	1.08218783719836e-21
ENSG00000109320	NFKB1	4	cg04163119	6	41754006	-8.66267639168642	6.56243246880887e-18
ENSG00000109320	NFKB1	4	cg04211179	1	16301562	-8.73294365442792	3.57405330225685e-18
ENSG00000109320	NFKB1	4	cg04333296	17	58180418	-8.12729003522941	5.78103830223206e-16
ENSG00000109320	NFKB1	4	cg04788957	10	105438008	-7.23993083507292	5.34787963488547e-13
ENSG00000109320	NFKB1	4	cg05055712	16	2880431	-9.46245957452094	4.95929560035047e-21
ENSG00000109320	NFKB1	4	cg05146922	2	10634174	-10.1250868922767	8.21012099827516e-24
ENSG00000109320	NFKB1	4	cg05376738	1	212923780	-10.769270355783	1.10399699208158e-26
ENSG00000109320	NFKB1	4	cg05405914	16	8972233	-17.1627589059931	8.78142408423474e-64
ENSG00000109320	NFKB1	4	cg05436939	4	1202599	-8.29291955132324	1.48853390631703e-16
ENSG00000109320	NFKB1	4	cg05503062	15	90324339	-14.8859072121716	7.85157247498861e-49
ENSG00000109320	NFKB1	4	cg05627365	15	81453408	-7.54668699243093	5.48544457714937e-14
ENSG00000109320	NFKB1	4	cg05839709	11	109962727	9.87688171745216	9.4765182173817e-23
ENSG00000109320	NFKB1	4	cg06169746	3	119419493	-10.8600598812581	4.21766441473787e-27
ENSG00000109320	NFKB1	4	cg06178669	11	63334608	-13.5256909963068	8.42936093050898e-41
ENSG00000109320	NFKB1	4	cg06433467	5	67730071	-7.3346097243401	2.67334468324991e-13
ENSG00000109320	NFKB1	4	cg06514003	17	40330907	-7.35633246055683	2.27744213241937e-13
ENSG00000109320	NFKB1	4	cg06619077	1	47656003	-8.9334687066605	6.15253051151908e-19
ENSG00000109320	NFKB1	4	cg06764092	1	159796658	-6.97897219463047	3.46036524366429e-12
ENSG00000109320	NFKB1	4	cg06792126	15	90365488	-9.46400525126319	4.88807046367607e-21
ENSG00000109320	NFKB1	4	cg06865845	17	72608711	-9.59528468305096	1.41918708004216e-21
ENSG00000109320	NFKB1	4	cg06891043	17	7186718	-8.95352603421939	5.14908379745968e-19
ENSG00000109320	NFKB1	4	cg07026433	7	129781152	-10.6550222904148	3.66619086771614e-26
ENSG00000109320	NFKB1	4	cg07037944	15	64290807	-17.5828082545593	9.66190703741148e-67
ENSG00000109320	NFKB1	4	cg07072405	12	105839243	-8.57089572222852	1.44129337771291e-17
ENSG00000109320	NFKB1	4	cg07136133	11	36422377	-6.78786140025425	1.30395761905561e-11
ENSG00000109320	NFKB1	4	cg07285708	3	10291324	-11.6445498751657	7.57165608720491e-31
ENSG00000109320	NFKB1	4	cg07352859	16	89050672	-8.1124635322919	6.51940804641568e-16
ENSG00000109320	NFKB1	4	cg07533239	12	6422131	-6.9422366584924	4.47748224121372e-12
ENSG00000109320	NFKB1	4	cg08036172	3	127473609	-8.29238218234914	1.49516299780235e-16
ENSG00000109320	NFKB1	4	cg08289056	10	6233666	-8.98319010510355	3.95432890166101e-19
ENSG00000109320	NFKB1	4	cg08548559	22	31686097	-13.248460135821	3.00337194423955e-39
ENSG00000109320	NFKB1	4	cg08575688	2	228678500	-8.9028696099959	8.06685630239056e-19
ENSG00000109320	NFKB1	4	cg08656816	17	34207454	-7.2679211889113	4.36054617598062e-13
ENSG00000109320	NFKB1	4	cg08719642	9	139595476	-6.7847066524113	1.33244140966025e-11
ENSG00000109320	NFKB1	4	cg09043456	17	79024087	-7.92296680122158	2.97516515738724e-15
ENSG00000109320	NFKB1	4	cg09275408	10	44500491	-15.8613166108437	5.2128555666419e-55
ENSG00000109320	NFKB1	4	cg09316140	8	21912474	-8.27753052479313	1.69035369756086e-16
ENSG00000109320	NFKB1	4	cg09621572	6	31539973	-6.94935598163497	4.2597952679549e-12
ENSG00000109320	NFKB1	4	cg09701700	10	104194843	-7.71264001689296	1.54214659445788e-14
ENSG00000109320	NFKB1	4	cg09865015	4	1202509	-10.572393517721	8.66931530346448e-26
ENSG00000109320	NFKB1	4	cg10005565	2	235578952	-9.47078114064582	4.58759361085145e-21
ENSG00000109320	NFKB1	4	cg10045881	1	111770291	-7.7077598997856	1.60137108166416e-14
ENSG00000109320	NFKB1	4	cg10315334	17	34207332	-8.28193809796172	1.62994216021208e-16
ENSG00000109320	NFKB1	4	cg10521450	10	105439280	-9.99976294163615	2.8431492614857e-23
ENSG00000109320	NFKB1	4	cg10691866	7	65817282	-7.85685514244521	5.01281505701417e-15
ENSG00000109320	NFKB1	4	cg10929758	2	54857270	-6.9550163223154	4.0941572547039e-12
ENSG00000109320	NFKB1	4	cg11012543	3	52231691	-20.8412183803681	1.04947521225863e-91
ENSG00000109320	NFKB1	4	cg11152384	11	68934300	-18.6130628631713	2.96935385547219e-74
ENSG00000109320	NFKB1	4	cg11715092	21	47705294	8.059108264433	1.00305412186056e-15
ENSG00000109320	NFKB1	4	cg11739399	1	206669785	-9.03749842389752	2.43354805097269e-19
ENSG00000109320	NFKB1	4	cg11823034	2	218858970	-6.8815243099363	6.83555441960261e-12
ENSG00000109320	NFKB1	4	cg11827101	2	8468422	-13.8838459200618	7.55305262209213e-43
ENSG00000109320	NFKB1	4	cg11998932	7	3901843	-8.73100798295835	3.63460860024656e-18
ENSG00000109320	NFKB1	4	cg12226095	4	27057954	-12.1886714054191	1.38042161406602e-33
ENSG00000109320	NFKB1	4	cg12352038	20	62114621	-7.73707181108008	1.27656522266949e-14
ENSG00000109320	NFKB1	4	cg12428160	10	44500693	-16.5023557058207	2.95437492014914e-59
ENSG00000109320	NFKB1	4	cg12547807	1	9473751	-7.5690821517108	4.62914828517908e-14
ENSG00000109320	NFKB1	4	cg13419330	3	10247487	-6.8808784507845004	6.866259772758e-12
ENSG00000109320	NFKB1	4	cg14069673	2	62385108	-9.0624232631213	1.94571546364933e-19
ENSG00000109320	NFKB1	4	cg14093127	2	8714417	-7.53914077395104	5.80768406970346e-14
ENSG00000109320	NFKB1	4	cg14437551	6	31539986	-7.56969136878528	4.60779412280371e-14
ENSG00000109320	NFKB1	4	cg14622819	4	76944817	-7.04859215830014	2.11596925480201e-12
ENSG00000109320	NFKB1	4	cg14886629	3	10333655	-6.9556857951804	4.07498925577202e-12
ENSG00000109320	NFKB1	4	cg15193228	22	30855332	-6.92897118260834	4.91258230496922e-12
ENSG00000109320	NFKB1	4	cg15797834	19	4338932	-7.5252277834519	6.45133230521893e-14
ENSG00000109320	NFKB1	4	cg15946653	11	113258444	-7.93260477984031	2.75633410094743e-15
ENSG00000109320	NFKB1	4	cg15947301	17	3462082	-16.691227015336	1.55398770762485e-60
ENSG00000109320	NFKB1	4	cg15958828	3	71598380	-7.16091896258942	9.47686791886676e-13
ENSG00000109320	NFKB1	4	cg16288101	14	88621538	-7.51615341511547	6.90841396867516e-14
ENSG00000109320	NFKB1	4	cg16471864	4	38666270	-6.8327418002525	9.57880730880213e-12
ENSG00000109320	NFKB1	4	cg16551670	5	106637856	-11.4447164136247	7.18230218497401e-30
ENSG00000109320	NFKB1	4	cg16914953	7	100798809	-8.16403204610002	4.28800960916208e-16
ENSG00000109320	NFKB1	4	cg16949914	10	6104515	-10.6873272416746	2.61426535890907e-26
ENSG00000109320	NFKB1	4	cg16983541	3	52231347	-14.2564100411495	4.9785565281969e-45
ENSG00000109320	NFKB1	4	cg17215278	1	117114263	-6.88007144590831	6.9048163796132e-12
ENSG00000109320	NFKB1	4	cg17341765	12	65997206	-8.15031159612422	4.79481923791345e-16
ENSG00000109320	NFKB1	4	cg17467525	1	9686523	-7.1474678127477	1.04402758553073e-12
ENSG00000109320	NFKB1	4	cg17578639	3	176862949	-8.96227551254038	4.76374561736243e-19
ENSG00000109320	NFKB1	4	cg18372930	5	137939469	-11.2254816050728	8.13274905978247e-29
ENSG00000109320	NFKB1	4	cg18643093	5	150521257	-7.82482267578961	6.44492722649611e-15
ENSG00000109320	NFKB1	4	cg18728264	11	118766491	-8.36281474480612	8.33199075577085e-17
ENSG00000109320	NFKB1	4	cg18764008	5	151101114	-7.11125434582629	1.35376442077106e-12
ENSG00000109320	NFKB1	4	cg19131667	3	17236940	-12.6936521360119	3.12997696883689e-36
ENSG00000109320	NFKB1	4	cg19199805	4	27058111	-8.0138764516608	1.44225760926802e-15
ENSG00000109320	NFKB1	4	cg19268652	6	12119552	-8.96151545074758	4.79605724707991e-19
ENSG00000109320	NFKB1	4	cg19313311	7	74058031	-9.94892217101512	4.68656076017073e-23
ENSG00000109320	NFKB1	4	cg19616339	2	69164114	-7.09426441889088	1.52859866129016e-12
ENSG00000109320	NFKB1	4	cg19661705	15	31307115	-8.38832673030003	6.73394338757298e-17
ENSG00000109320	NFKB1	4	cg19893929	2	16105823	-10.9471308745452	1.66432493695526e-27
ENSG00000109320	NFKB1	4	cg19910679	5	149240728	-7.4034937814759	1.60568179684885e-13
ENSG00000109320	NFKB1	4	cg19920134	7	38227870	-9.81971175190947	1.65137353612877e-22
ENSG00000109320	NFKB1	4	cg20607293	1	147112703	-10.0462350256737	1.79677554392629e-23
ENSG00000109320	NFKB1	4	cg20774552	11	46415316	-15.9043524748755	2.73261303310306e-55
ENSG00000109320	NFKB1	4	cg21141329	17	48290459	-14.108597396486	3.70344145274632e-44
ENSG00000109320	NFKB1	4	cg21216471	17	4644276	-7.33535480168012	2.65870810780828e-13
ENSG00000109320	NFKB1	4	cg21529807	19	42134478	-15.9713010399407	9.97476657724305e-56
ENSG00000109320	NFKB1	4	cg21695395	11	128364143	-9.3486997497587	1.42945465693507e-20
ENSG00000109320	NFKB1	4	cg22242842	2	85167149	-10.7483068335825	1.37720504719821e-26
ENSG00000109320	NFKB1	4	cg22322277	6	75459158	-21.5059988856904	3.21154403224638e-97
ENSG00000109320	NFKB1	4	cg22514722	3	127473755	-8.42646077755944	4.89263448838017e-17
ENSG00000109320	NFKB1	4	cg22579075	7	94250352	-7.77144600294958	9.77561606443065e-15
ENSG00000109320	NFKB1	4	cg22870429	3	114027859	-15.1183890583287	2.84387838046305e-50
ENSG00000109320	NFKB1	4	cg23045716	4	1201881	-9.94981362200767	4.64576532586501e-23
ENSG00000109320	NFKB1	4	cg23681974	3	126734092	-6.79526719440594	1.2394153528028e-11
ENSG00000109320	NFKB1	4	cg23716141	17	75360477	-6.78958008248659	1.28869182076699e-11
ENSG00000109320	NFKB1	4	cg23786580	7	43204506	-13.78736059261	2.71955087377007e-42
ENSG00000109320	NFKB1	4	cg23813257	16	3115286	-10.1412080306837	6.99040733556129e-24
ENSG00000109320	NFKB1	4	cg24088496	11	96071506	-8.79996649207628	1.99332801362195e-18
ENSG00000109320	NFKB1	4	cg24163658	3	58182370	-11.8603785674189	6.40370001979953e-32
ENSG00000109320	NFKB1	4	cg24174557	17	57903544	-8.18786069148857	3.53031749267144e-16
ENSG00000109320	NFKB1	4	cg24587080	6	160016373	-10.536586464152	1.25637057433373e-25
ENSG00000109320	NFKB1	4	cg24957609	12	27125095	-17.2160279432017	3.73050311719175e-64
ENSG00000109320	NFKB1	4	cg25073708	9	132083538	-7.75808443088104	1.08455726781661e-14
ENSG00000109320	NFKB1	4	cg25123427	3	39054994	-19.1027002613161	5.98289832004049e-78
ENSG00000109320	NFKB1	4	cg25141611	13	113422162	-7.47747763130509	9.24076099510443e-14
ENSG00000109320	NFKB1	4	cg25762679	1	101185311	-10.4240833820441	4.00017114999073e-25
ENSG00000109320	NFKB1	4	cg25897251	12	53509460	-8.04505897942362	1.12305757955559e-15
ENSG00000109320	NFKB1	4	cg26094599	2	219748780	6.85578944039123	8.16959607006149e-12
ENSG00000109320	NFKB1	4	cg26259865	16	2880359	-6.8992054480173	6.04532820721191e-12
ENSG00000109320	NFKB1	4	cg26543539	1	156907349	-7.57178958791599	4.53498664777646e-14
ENSG00000109320	NFKB1	4	cg26708797	5	170906387	-7.95091221277742	2.38343450019761e-15
ENSG00000109320	NFKB1	4	cg27250032	10	5544140	-9.14604586589773	9.14692154493004e-20
ENSG00000084092	NOA1	4	cg03584693	3	101280436	-7.98894900006494	1.76037665798184e-15
ENSG00000170502	NUDT9	4	cg26560020	1	952794	-11.0885801144616	3.62104636888988e-28
ENSG00000109180	OCIAD1	4	cg11122456	11	40612873	-12.1669545780516	1.78457574888194e-33
ENSG00000185619	PCGF3	4	cg11586658	5	131563581	22.764992048973	4.92238470345488e-108
ENSG00000185619	PCGF3	4	cg11951449	1	116519025	-15.1051898486246	3.43760467869677e-50
ENSG00000185619	PCGF3	4	cg12575136	18	32820987	-7.26578085621555	4.42925116921965e-13
ENSG00000138735	PDE5A	4	cg00141295	7	56182960	-9.19522552597167	5.85020967826139e-20
ENSG00000138735	PDE5A	4	cg13974601	11	50256574	-9.1448594311028	9.24582264527803e-20
ENSG00000138735	PDE5A	4	cg25214090	10	38739885	-59.4972896189047	0
ENSG00000163737	PF4	4	cg21038502	19	2799962	-7.17589077094648	8.50700948352293e-13
ENSG00000169299	PGM2	4	cg04038500	8	12570225	10.9264499830175	2.07695140213089e-27
ENSG00000174227	PIGG	4	cg19764325	22	32340710	10.1532722795756	6.19676054281172e-24
ENSG00000138670	RASGEF1B	4	cg09480837	10	95789501	15.0999372329126	3.70686981733411e-50
ENSG00000159788	RGS12	4	cg06795816	11	71791709	12.7072964483733	2.64685621743543e-36
ENSG00000145428	RNF175	4	cg05894734	4	40859249	6.83290716683734	9.56789377545137e-12
ENSG00000178222	RNF212	4	cg04041669	11	8190690	-6.91603451151832	5.37672545947791e-12
ENSG00000260404	RP11-384K6.6	4	cg13116071	1	243368706	12.220093523580699	9.51318897291693e-34
ENSG00000145423	SFRP2	4	cg05894734	4	40859249	-11.8449267009328	7.653062567582e-32
ENSG00000163069	SGCB	4	cg11122456	11	40612873	-23.9928502052142	4.92455373846328e-119
ENSG00000163950	SLBP	4	cg02612650	6	26195910	6.89859673281962	6.07098071384602e-12
ENSG00000163950	SLBP	4	cg08122386	6	26195954	6.90654767661271	5.74415998564019e-12
ENSG00000145217	SLC26A1	4	cg01749555	17	80709803	7.00225692562214	2.93697169213115e-12
ENSG00000145217	SLC26A1	4	cg01799862	16	67143802	10.8987633167999	2.79212616116249e-27
ENSG00000145217	SLC26A1	4	cg07636117	2	237072957	6.80494214230186	1.15979479488681e-11
ENSG00000145217	SLC26A1	4	cg07976860	16	67281332	-11.5099468225715	3.45969428749097e-30
ENSG00000145217	SLC26A1	4	cg08136276	4	83351514	8.90608629890475	7.84068976063095e-19
ENSG00000145217	SLC26A1	4	cg09821533	6	13712174	19.0072306978801	3.1898567978345e-77
ENSG00000145217	SLC26A1	4	cg13631105	18	29599349	-7.35881510033175	2.23604092405337e-13
ENSG00000145217	SLC26A1	4	cg15457005	11	11643754	21.4671475849379	6.80391542060394e-97
ENSG00000145217	SLC26A1	4	cg17687970	8	22462467	11.6489877307314	7.1997173184898e-31
ENSG00000145217	SLC26A1	4	cg20693608	4	113152836	9.77500281076023	2.5442427479099e-22
ENSG00000145217	SLC26A1	4	cg20822818	11	119235062	26.447094423584	2.74782889468165e-142
ENSG00000145217	SLC26A1	4	cg21249729	9	138392748	24.1435816136081	2.05171267983638e-120
ENSG00000109667	SLC2A9	4	cg06175025	14	78082992	-9.27158424693301	2.90981500765456e-20
ENSG00000109667	SLC2A9	4	cg15882809	6	26285828	44.4400430475014	0
ENSG00000109667	SLC2A9	4	cg18275445	14	74254023	9.13818044980684	9.82263312382891e-20
ENSG00000109667	SLC2A9	4	cg23162587	7	5570491	9.68390560674117	6.10322443660723e-22
ENSG00000109667	SLC2A9	4	cg25845331	1	15851274	-9.37703732992437	1.09934297552381e-20
ENSG00000109667	SLC2A9	4	cg26043149	18	55253948	64.8907426138742	0
ENSG00000164038	SLC9B2	4	cg16471864	4	38666270	7.05657566633606	1.99933975107031e-12
ENSG00000170365	SMAD1	4	cg03172717	10	51565268	-7.4854334939494	8.70504443927118e-14
ENSG00000269893	SNHG8	4	cg01044331	12	2904352	14.7537786656841	5.07140942632344e-48
ENSG00000269893	SNHG8	4	cg24350395	1	243288625	8.83745393322318	1.43532845367869e-18
ENSG00000269893	SNHG8	4	cg26518628	1	97050305	11.5903765273239	1.39832342390384e-30
ENSG00000159674	SPON2	4	cg00748938	14	94641781	-14.9024854131316	6.20656882886227e-49
ENSG00000035720	STAP1	4	cg06128917	15	35385353	-13.0360735676153	4.43357911138099e-38
ENSG00000168818	STX18	4	cg02670466	3	47020191	-11.0169218884089	7.85944954247937e-28
ENSG00000168818	STX18	4	cg04640216	11	63439065	12.1961377847761	1.26365142019905e-33
ENSG00000013810	TACC3	4	cg02612650	6	26195910	6.9700866798937	3.68333991754342e-12
ENSG00000013810	TACC3	4	cg08122386	6	26195954	6.95477067110034	4.10121276557216e-12
ENSG00000173011	TADA2B	4	cg07817883	1	32538562	-40.4363089247065	1.80213335195763e-300
ENSG00000169762	TAPT1	4	cg00140479	22	21356515	-7.0894792246906	1.58171842173121e-12
ENSG00000169762	TAPT1	4	cg00152757	7	65939507	33.7932405434357	1.1159609148819e-220
ENSG00000169762	TAPT1	4	cg02526508	11	58494370	12.4015005890733	1.09001413227107e-34
ENSG00000132406	TMEM128	4	cg00661438	3	75661320	8.37731363867117	7.3828435898749e-17
ENSG00000127419	TMEM175	4	cg01799862	16	67143802	-21.4253016166572	1.52550600011942e-96
ENSG00000127419	TMEM175	4	cg02698600	1	201450009	-12.6330193895121	6.58015500114777e-36
ENSG00000127419	TMEM175	4	cg05272556	6	34360624	-8.71625321140833	4.13072925641167e-18
ENSG00000127419	TMEM175	4	cg07636117	2	237072957	-13.089653265207	2.25644782164536e-38
ENSG00000127419	TMEM175	4	cg09821533	6	13712174	-15.7951447968156	1.4030403789191e-54
ENSG00000127419	TMEM175	4	cg15457005	11	11643754	-37.0806895125534	2.74243792140338e-259
ENSG00000127419	TMEM175	4	cg17274771	17	7465072	-7.17480391833254	8.57400554989189e-13
ENSG00000127419	TMEM175	4	cg17687970	8	22462467	-21.5752059725693	8.40941567123429e-98
ENSG00000127419	TMEM175	4	cg20693608	4	113152836	-21.140471228714	3.5955751322602e-94
ENSG00000127419	TMEM175	4	cg20822818	11	119235062	-26.6280347590174	4.57935869780808e-144
ENSG00000127419	TMEM175	4	cg21249729	9	138392748	-20.1426761470356	4.62692495106385e-86
ENSG00000033178	UBA6	4	cg20354485	8	134471026	-12.6106781798713	8.6453707641229e-36
ENSG00000145390	USP53	4	cg25214090	10	38739885	-11.572771692264	1.70584391546389e-30
ENSG00000145390	USP53	4	cg26518628	1	97050305	-7.23843558453863	5.40639520252546e-13
ENSG00000163945	UVSSA	4	cg00184235	8	126442434	-7.24922512598933	4.99785676302001e-13
ENSG00000163945	UVSSA	4	cg00748938	14	94641781	-9.25379748221159	3.42551906310837e-20
ENSG00000163945	UVSSA	4	cg02018101	14	64320521	8.26074926829789	1.94125334742422e-16
ENSG00000163945	UVSSA	4	cg02020829	5	92908771	13.3141927872318	1.2950789353669e-39
ENSG00000163945	UVSSA	4	cg09821533	6	13712174	-7.83899670869256	5.76737264871034e-15
ENSG00000163945	UVSSA	4	cg12575136	18	32820987	7.35386419013834	2.31935022993044e-13
ENSG00000163945	UVSSA	4	cg20822818	11	119235062	-10.0273735372802	2.16515699698178e-23
ENSG00000163945	UVSSA	4	cg21249729	9	138392748	-8.9789063526563	4.1082064056717e-19
ENSG00000071127	WDR1	4	cg06175025	14	78082992	6.92737825931152	4.96753950946292e-12
ENSG00000071127	WDR1	4	cg15882809	6	26285828	-52.8059861432472	0
ENSG00000071127	WDR1	4	cg18275445	14	74254023	-10.8108275774251	7.11356913353199e-27
ENSG00000071127	WDR1	4	cg23162587	7	5570491	-11.2317927197072	7.5885689010108e-29
ENSG00000071127	WDR1	4	cg25845331	1	15851274	9.50728769478634	3.25703546522116e-21
ENSG00000071127	WDR1	4	cg26043149	18	55253948	-82.5999353214011	0
ENSG00000109501	WFS1	4	cg22924550	3	117890213	8.42003473683901	5.16370314931568e-17
ENSG00000178163	ZNF518B	4	cg26043149	18	55253948	9.89157395457935	8.21205980038761e-23
ENSG00000250312	ZNF718	4	cg02664162	19	49469375	15.7228481539847	4.12158755912203e-54
ENSG00000250312	ZNF718	4	cg03720617	16	47527034	24.6693040608218	2.80525214348965e-125
ENSG00000250312	ZNF718	4	cg11777498	6	89673741	27.4801334341059	1.4930816711992e-152
ENSG00000250312	ZNF718	4	cg14076411	6	89673710	9.66277952652891	7.46808607468331e-22
ENSG00000250312	ZNF718	4	cg15117681	17	80202426	11.1326546551019	2.24298306183771e-28
ENSG00000250312	ZNF718	4	cg15571405	7	130796167	11.6585888428079	6.45598643557394e-31
ENSG00000250312	ZNF718	4	cg16920502	8	133141439	8.36966028036086	7.86973522830533e-17
ENSG00000250312	ZNF718	4	cg19904905	19	49469667	15.5112859491891	9.41309443162627e-53
ENSG00000250312	ZNF718	4	cg22027879	19	49469965	10.4245820981233	3.97978921941801e-25
ENSG00000250312	ZNF718	4	cg22672060	4	156464550	18.5971768433856	3.90146143889597e-74
ENSG00000250312	ZNF718	4	cg22876092	10	88126287	7.67355806023568	2.08410959641042e-14
ENSG00000182903	ZNF721	4	cg03720617	16	47527034	9.3282824055531	1.72637208319556e-20
ENSG00000182903	ZNF721	4	cg11777498	6	89673741	9.55302927448119	2.11676375216053e-21
ENSG00000182903	ZNF721	4	cg19904905	19	49469667	9.31051937312748	2.03379143769598e-20
ENSG00000182903	ZNF721	4	cg22027879	19	49469965	7.83118745094596	6.13149314405854e-15
ENSG00000113273	ARSB	5	cg25496680	19	16604089	-8.75902967221208	2.84892000581453e-18
ENSG00000028310	BRD9	5	cg05233674	6	34433773	8.50991855774502	2.4203217981385e-17
ENSG00000028310	BRD9	5	cg11887960	12	57824829	14.7790057791	3.55581545350635e-48
ENSG00000028310	BRD9	5	cg15009431	4	153704527	-8.61698256600337	9.71860740872324e-18
ENSG00000028310	BRD9	5	cg15014369	7	18393351	-22.4539152252807	2.56286119300145e-105
ENSG00000028310	BRD9	5	cg15371732	17	78194151	8.53614281172247	1.93749727272948e-17
ENSG00000028310	BRD9	5	cg25482853	8	67687455	17.5241741017254	2.52174959130535e-66
ENSG00000028310	BRD9	5	cg27053975	1	166958233	-10.202257721668	3.79365614372514e-24
ENSG00000168903	BTNL3	5	cg00629983	7	55323105	-9.06376492024506	1.92239330812716e-19
ENSG00000168903	BTNL3	5	cg00635299	1	220219163	-7.08283878045094	1.65844544458774e-12
ENSG00000168903	BTNL3	5	cg08124330	19	19314918	21.1947283190433	1.27586830825706e-94
ENSG00000168903	BTNL3	5	cg13134248	15	52842295	8.52004827263923	2.22116021893189e-17
ENSG00000113303	BTNL8	5	cg00629983	7	55323105	9.4026007047668	8.66927941240461e-21
ENSG00000113303	BTNL8	5	cg00635299	1	220219163	6.78633291343526	1.31768281518624e-11
ENSG00000113303	BTNL8	5	cg08124330	19	19314918	-21.9349985177289	7.51023426583464e-101
ENSG00000113303	BTNL8	5	cg13134248	15	52842295	-8.68036848089531	5.63387050918316e-18
ENSG00000197536	C5orf56	5	cg08425479	4	126236006	7.30964492117823	3.21227295899558e-13
ENSG00000164366	CCDC127	5	cg00591740	6	150377927	-8.94947720694447	5.33767166118564e-19
ENSG00000164366	CCDC127	5	cg06928982	1	36851566	-7.40052074460569	1.64155359588032e-13
ENSG00000164366	CCDC127	5	cg10171347	10	134600301	7.90594447408811	3.40422831495685e-15
ENSG00000164366	CCDC127	5	cg10500461	5	149110563	9.88262520495547	8.96076624274536e-23
ENSG00000164366	CCDC127	5	cg12696929	3	195401817	-7.54486752561357	5.56149245393842e-14
ENSG00000164366	CCDC127	5	cg15371732	17	78194151	14.0900802565158	4.75563792647003e-44
ENSG00000164366	CCDC127	5	cg16157821	3	58419758	-7.15717201753337	9.73609761008245e-13
ENSG00000164366	CCDC127	5	cg16161657	10	50746729	-14.1339100384863	2.62990268340705e-44
ENSG00000164366	CCDC127	5	cg16168311	1	156561947	-20.8103142381713	1.87911841886757e-91
ENSG00000164366	CCDC127	5	cg18331263	5	68630796	-9.59173910194649	1.46769703556967e-21
ENSG00000164366	CCDC127	5	cg19571293	19	1028488	6.84121861000964	9.0347926691797e-12
ENSG00000164366	CCDC127	5	cg21150302	3	195723614	8.22145845609772	2.68138998003057e-16
ENSG00000164366	CCDC127	5	cg25172682	17	34122758	-7.30431259605462	3.34052728339852e-13
ENSG00000164366	CCDC127	5	cg25220065	12	112847133	-8.67538524959073	5.88142020774519e-18
ENSG00000164366	CCDC127	5	cg25482853	8	67687455	9.54823435138418	2.21477728412925e-21
ENSG00000112877	CEP72	5	cg10743685	11	57298307	-9.20047224386692	5.57706876044558e-20
ENSG00000145781	COMMD10	5	cg20768342	1	85483948	13.1912672307278	6.22485930546445e-39
ENSG00000245937	CTC-228N24.3	5	cg16011800	17	1958478	-35.1594605962638	1.70290420911455e-236
ENSG00000249476	CTD-2587M2.1	5	cg15842559	19	38271471	-8.36502932041966	8.1795906637461e-17
ENSG00000169570	DTWD2	5	cg06896619	17	61851486	-8.0410320394044	1.15999012199012e-15
ENSG00000170571	EMB	5	cg25512188	6	167093321	13.913387027848	5.09423296328239e-43
ENSG00000170571	EMB	5	cg25536256	2	92275705	-7.6493636594294	2.50944982660805e-14
ENSG00000180104	EXOC3	5	cg02377073	8	48920860	-9.4226663087385	7.19171820243889e-21
ENSG00000180104	EXOC3	5	cg08313168	12	7315531	-11.139540678151	2.08093606619015e-28
ENSG00000180104	EXOC3	5	cg10171347	10	134600301	-17.2279480577345	3.07917523002608e-64
ENSG00000180104	EXOC3	5	cg11887960	12	57824829	-20.4756533364698	9.86637216571081e-89
ENSG00000180104	EXOC3	5	cg15371732	17	78194151	-36.3930497250149	4.64383437843722e-251
ENSG00000180104	EXOC3	5	cg25482853	8	67687455	-20.4744762041632	1.00846954917385e-88
ENSG00000180104	EXOC3	5	cg25796098	6	30710373	-7.99694998649201	1.65138787529505e-15
ENSG00000180104	EXOC3	5	cg27053975	1	166958233	12.2120901247047	1.04603108966559e-33
ENSG00000131187	F12	5	cg22159557	15	65067668	-12.3189480119476	2.93207916824984e-34
ENSG00000160867	FGFR4	5	cg22159557	15	65067668	10.9482825307639	1.64390507938758e-27
ENSG00000175857	GAPT	5	cg08447792	4	110600020	-6.89753701660405	6.11589418818203e-12
ENSG00000175857	GAPT	5	cg14279792	6	57176236	-7.12530239019325	1.22415719408384e-12
ENSG00000173221	GLRX	5	cg26853442	5	161178531	-16.0951002714784	1.53228445128142e-56
ENSG00000204628	GNB2L1	5	cg22001279	11	132411	7.06867538072569	1.83450434435834e-12
ENSG00000113161	HMGCR	5	cg21683619	1	66070348	12.7088702887311	2.59613460879963e-36
ENSG00000169223	LMAN2	5	cg21496518	3	15374154	14.2413737510517	6.11123113691991e-45
ENSG00000169223	LMAN2	5	cg22159557	15	65067668	-23.4216500983318	7.31016992053002e-114
ENSG00000169223	LMAN2	5	cg24511341	13	111358516	6.94575763839224	4.36849162683459e-12
ENSG00000145495	MARCH6	5	cg02301754	1	151149370	-9.75558221894998	3.06794709844961e-22
ENSG00000171444	MCC	5	cg05541779	15	45943467	17.769043367114	4.50688162697047e-68
ENSG00000171421	MRPL36	5	cg01509141	13	44453359	9.30283635259651	2.18298627335054e-20
ENSG00000171421	MRPL36	5	cg05226967	18	55102913	11.4023030393321	1.15248262071272e-29
ENSG00000171421	MRPL36	5	cg06437144	17	45973627	10.5312741394364	1.32733371800387e-25
ENSG00000171421	MRPL36	5	cg10355989	2	9143982	12.2154209031993	1.00552688337657e-33
ENSG00000112996	MRPS30	5	cg25512188	6	167093321	14.5133645674059	1.45474642442279e-46
ENSG00000213347	MXD3	5	cg23892025	2	63849775	7.87009005375583	4.5171790091298e-15
ENSG00000213347	MXD3	5	cg26823158	1	211380704	6.87652583590436	7.07674641672353e-12
ENSG00000152620	NADK2	5	cg14349131	9	14287483	-7.39435181187286	1.71851751950276e-13
ENSG00000134986	NREP	5	cg07573936	15	55805566	7.41331557765818	1.49256598742862e-13
ENSG00000164346	NSA2	5	cg07967114	12	94915694	-16.6085415391235	5.66154654891903e-60
ENSG00000145730	PAM	5	cg07451297	17	7486874	-8.43732159000766	4.46605891006982e-17
ENSG00000145730	PAM	5	cg09663193	17	7486821	-8.77522721022762	2.47395682228627e-18
ENSG00000145730	PAM	5	cg13546736	17	7486858	-7.93410337180167	2.72376399902159e-15
ENSG00000151883	PARP8	5	cg10716909	1	121260116	-7.20101229029909	7.09407930681373e-13
ENSG00000249915	PDCD6	5	cg00591740	6	150377927	16.6051649929575	5.96777933895014e-60
ENSG00000249915	PDCD6	5	cg02377073	8	48920860	-13.6400837610885	1.89243236397061e-41
ENSG00000249915	PDCD6	5	cg10500461	5	149110563	-9.12635837425059	1.09321278206489e-19
ENSG00000249915	PDCD6	5	cg12696929	3	195401817	16.2230004578111	2.1831172043133e-57
ENSG00000249915	PDCD6	5	cg15371732	17	78194151	-11.8093997331617	1.15199758035435e-31
ENSG00000249915	PDCD6	5	cg15616888	7	140397014	-7.80673033537714	7.4246228321968e-15
ENSG00000249915	PDCD6	5	cg16161657	10	50746729	10.0192026141045	2.34710843403662e-23
ENSG00000249915	PDCD6	5	cg16168311	1	156561947	15.5307554383181	7.06925371276113e-53
ENSG00000249915	PDCD6	5	cg18331263	5	68630796	7.83384796456786	6.00496907638656e-15
ENSG00000249915	PDCD6	5	cg19571293	19	1028488	-9.5748715667091	1.7219048151577e-21
ENSG00000249915	PDCD6	5	cg21150302	3	195723614	-17.9438671581435	2.47418240323505e-69
ENSG00000249915	PDCD6	5	cg25220065	12	112847133	8.84971708673361	1.28875558799512e-18
ENSG00000175309	PHYKPL	5	cg23999973	12	118814623	7.97583999512279	1.95445683222112e-15
ENSG00000145632	PLK2	5	cg08447792	4	110600020	9.48767267026018	3.91578924830972e-21
ENSG00000145725	PPIP5K2	5	cg05086567	17	7486615	7.22046218305032	6.16092717301022e-13
ENSG00000145725	PPIP5K2	5	cg07451297	17	7486874	11.543373211692	2.37594158659601e-30
ENSG00000145725	PPIP5K2	5	cg09663193	17	7486821	13.0624160159039	3.18182053020506e-38
ENSG00000145725	PPIP5K2	5	cg13520520	19	11616957	7.47726011587842	9.25585390964103e-14
ENSG00000145725	PPIP5K2	5	cg13546736	17	7486858	10.293736015053	1.50845725205505e-24
ENSG00000169230	PRELID1	5	cg23892025	2	63849775	-8.91249168616783	7.40882224638924e-19
ENSG00000169230	PRELID1	5	cg26823158	1	211380704	-8.36829102355652	7.96012557334726e-17
ENSG00000129625	REEP5	5	cg24385666	4	2278261	8.57588410997699	1.38123975293643e-17
ENSG00000169220	RGS14	5	cg03701779	10	74927978	6.8234475260081	1.02122053145631e-11
ENSG00000169220	RGS14	5	cg21496518	3	15374154	14.3411627340431	1.56220388144502e-45
ENSG00000169220	RGS14	5	cg22159557	15	65067668	-23.4412841677923	4.87218258763393e-114
ENSG00000169220	RGS14	5	cg24511341	13	111358516	6.9745361179563	3.56997795598566e-12
ENSG00000164292	RHOBTB3	5	cg26853442	5	161178531	7.58571660006658	4.0796051293437e-14
ENSG00000073578	SDHA	5	cg00591740	6	150377927	-18.362674357848	2.14568392688589e-72
ENSG00000073578	SDHA	5	cg02377073	8	48920860	22.139259226832	1.33983078068526e-102
ENSG00000073578	SDHA	5	cg12696929	3	195401817	-18.9752472997569	5.57957866768099e-77
ENSG00000073578	SDHA	5	cg15371732	17	78194151	9.99698695394326	2.92198392168843e-23
ENSG00000073578	SDHA	5	cg15616888	7	140397014	9.51612752688913	2.99723021590153e-21
ENSG00000073578	SDHA	5	cg16168311	1	156561947	-10.3794132836422	6.31523902041488e-25
ENSG00000073578	SDHA	5	cg19571293	19	1028488	11.4250911476998	8.94085484169346e-30
ENSG00000073578	SDHA	5	cg21150302	3	195723614	19.9637885889011	1.21794996072539e-84
ENSG00000039123	SKIV2L2	5	cg07387335	15	34781891	-31.7721821371102	6.18750609519936e-198
ENSG00000064651	SLC12A2	5	cg16011800	17	1958478	-36.8627607212248	1.13315350087926e-256
ENSG00000113504	SLC12A7	5	cg04701034	14	52536175	-12.7872244440632	9.88043120827021e-37
ENSG00000113504	SLC12A7	5	cg10495084	15	96889416	-9.756155391255	3.0510609636047e-22
ENSG00000113504	SLC12A7	5	cg23286592	5	121290130	-6.86841077902946	7.48620292426256e-12
ENSG00000197208	SLC22A4	5	cg03440556	10	102107757	-7.2750467445723	4.13927371501012e-13
ENSG00000197208	SLC22A4	5	cg08425479	4	126236006	12.0307250664295	8.85033850716261e-33
ENSG00000197208	SLC22A4	5	cg24503796	10	102107676	-7.06771013300404	1.84714908962781e-12
ENSG00000197375	SLC22A5	5	cg03440556	10	102107757	-6.90337859811771	5.87230250347012e-12
ENSG00000197375	SLC22A5	5	cg08425479	4	126236006	12.1816730567656	1.49958306866063e-33
ENSG00000197375	SLC22A5	5	cg17868778	5	55146879	-6.80958875069269	1.12335877255244e-11
ENSG00000197375	SLC22A5	5	cg24503796	10	102107676	-6.98787284596185	3.25029939007592e-12
ENSG00000066230	SLC9A3	5	cg08313168	12	7315531	10.176138345192	4.92954533389735e-24
ENSG00000066230	SLC9A3	5	cg10171347	10	134600301	10.0573755202412	1.60911588731271e-23
ENSG00000066230	SLC9A3	5	cg11887960	12	57824829	14.4701106648433	2.64713157374731e-46
ENSG00000066230	SLC9A3	5	cg15371732	17	78194151	15.7745164853264	1.90894848234289e-54
ENSG00000066230	SLC9A3	5	cg21348210	2	88650305	8.19184933123578	3.41709113705558e-16
ENSG00000066230	SLC9A3	5	cg25482853	8	67687455	16.3670154143155	2.39451750821033e-58
ENSG00000066230	SLC9A3	5	cg27053975	1	166958233	-10.1641737401865	5.55675891215398e-24
ENSG00000152582	SPEF2	5	cg04521224	2	37332584	13.637711575661	1.95219930724094e-41
ENSG00000164296	TIGD6	5	cg07176692	1	113500329	-6.8383453879719	9.21570497769745e-12
ENSG00000164296	TIGD6	5	cg15241499	18	76635712	-6.8171592296425	1.06638426397032e-11
ENSG00000174695	TMEM167A	5	cg00774769	1	194400632	21.8199508550709	7.16058944016713e-100
ENSG00000174695	TMEM167A	5	cg06759901	7	126446757	-10.7693467888149	1.10310650193196e-26
[truncated: 10,440 more rows]
