# Supplementary material for: Genome-wide identification of genes regulating DNA methylation using genetic anchors for causal inference
Source: Genome Biol. 2020 Aug 28;21:220. doi: 10.1186/s13059-020-02114-z (PMC7453518; doi:10.1186/s13059-020-02114-z)
Supplement: Supplementary file 3 — Additional file 3: Table S3. Associations between GIs and trans CpGs that remained significant (P < 1.4 x 10-11) after taking LD/pleiotropy among neighboring genes into account. [file 13059_2020_2114_MOESM3_ESM.csv]

Ensembl_ID	HGNC_ID	Chr_gene	CpG	Chr_CpG	CpG_pos	Test_statistic	P_value
ENSG00000097021	ACOT7	1	cg15015518	1	17035497	-6.943196544888345	4.449790077158813e-12
ENSG00000188157	AGRN	1	cg09027357	8	256911	-7.611991534317675	3.3440121107247115e-14
ENSG00000143595	AQP10	1	cg02835499	17	46178918	9.735731234625264	3.736085805327957e-22
ENSG00000132694	ARHGEF11	1	cg23112950	11	66369765	-18.784783034498492	1.6009568712261829e-75
ENSG00000160072	ATAD3B	1	cg16196077	10	64028521	-18.24410258593405	1.6853010269409882e-71
ENSG00000143515	ATP8B2	1	cg25748542	3	119393058	18.718524830736133	5.201239509885719e-75
ENSG00000228594	C1orf233	1	cg16196077	10	64028521	-9.391806284345224	9.624731662141993e-21
ENSG00000116161	CACYBP	1	cg13849727	9	15810627	-9.346746709502868	1.4561974546905358e-20
ENSG00000186409	CCDC30	1	cg17459298	12	43946341	10.69975615057598	2.301564727633023e-26
ENSG00000196352	CD55	1	cg05958702	16	30960101	12.644416079854045	5.752056925828996e-36
ENSG00000130695	CEP85	1	cg19403339	2	183580841	-6.80762950489158	1.1393964327405448e-11
ENSG00000000971	CFH	1	cg07222861	1	32355084	-9.000418898358227	3.390916459976302e-19
ENSG00000162368	CMPK1	1	cg00999644	16	20817639	-9.261142137608768	3.2056858794798446e-20
ENSG00000116133	DHCR24	1	cg18517677	9	131799243	9.645474079430068	8.82306401012696e-22
ENSG00000156171	DRAM2	1	cg15830792	10	64893214	-8.851015624682272	1.27605551147739e-18
ENSG00000203965	EFCAB7	1	cg02609781	13	50656090	16.94793843001959	2.7253138542080568e-62
ENSG00000074800	ENO1	1	cg00994804	21	36259383	-7.1649772818232655	9.20754773212681e-13
ENSG00000074800	ENO1	1	cg01899542	16	49732224	7.349636219055795	2.3939969335404195e-13
ENSG00000074800	ENO1	1	cg02380135	2	149866270	7.9108747573148275	3.2760401221504335e-15
ENSG00000074800	ENO1	1	cg03142697	21	36258497	-7.621555532444808	3.106108044549061e-14
ENSG00000074800	ENO1	1	cg04086531	16	49732376	7.74360660314035	1.2141996517053424e-14
ENSG00000074800	ENO1	1	cg07633317	16	49732623	7.938582808515106	2.63027443688706e-15
ENSG00000074800	ENO1	1	cg08498747	17	41747669	8.48848860585849	2.903885593049172e-17
ENSG00000074800	ENO1	1	cg09092525	20	58570133	7.130095503349474	1.1832670118037009e-12
ENSG00000074800	ENO1	1	cg09827249	10	135051256	-7.930661243119751	2.8008671264366895e-15
ENSG00000074800	ENO1	1	cg12477880	21	36259241	-7.047291783683955	2.1364167129419705e-12
ENSG00000074800	ENO1	1	cg22698744	21	36263808	-7.947951411023845	2.4416939759637736e-15
ENSG00000074800	ENO1	1	cg23068772	7	30737061	8.056955086706507	1.0212569002404286e-15
ENSG00000074800	ENO1	1	cg25162533	17	81032067	7.629473663050805	2.923727381392779e-14
ENSG00000074800	ENO1	1	cg26929700	16	49732567	7.457947676650153	1.070229863845286e-13
ENSG00000187017	ESPN	1	cg11404039	4	155471778	14.837773187432553	1.567128341402347e-48
ENSG00000067208	EVI5	1	cg07340025	5	14926200	7.122628480128564	1.2483041787428746e-12
ENSG00000067208	EVI5	1	cg24334029	20	58296208	-6.8819004694939085	6.8199032124815265e-12
ENSG00000117480	FAAH	1	cg20693607	3	184319566	-10.756349651959715	1.2701152731431217e-26
ENSG00000143226	FCGR2A	1	cg18430411	8	144873183	11.416548202941705	9.919971114868655e-30
ENSG00000131781	FMO5	1	cg02953927	15	44038812	7.859139673892395	4.925928951195416e-15
ENSG00000134183	GNAT2	1	cg05051117	1	205719564	8.667827739162167	6.291742977827044e-18
ENSG00000143167	GPA33	1	cg11678250	7	136362483	10.541889351250703	1.1910605388562942e-25
ENSG00000213366	GSTM2	1	cg17024258	1	160370982	7.040605918161069	2.2415709498536462e-12
ENSG00000127124	HIVEP3	1	cg06770429	6	143206075	11.142539001079838	2.021535898700685e-28
ENSG00000153936	HS2ST1	1	cg10681811	5	76904661	7.500851372454572	7.753887309942899e-14
ENSG00000153936	HS2ST1	1	cg14655345	4	185659507	9.060380000402164	1.9825897976927069e-19
ENSG00000173110	HSPA6	1	cg20962211	2	183580829	9.058676789446755	2.019236795054814e-19
ENSG00000162729	IGSF8	1	cg07187863	1	32229600	7.172408521718895	8.731863576665517e-13
ENSG00000160712	IL6R	1	cg15312497	10	31192123	14.689208664544195	1.290636190385867e-47
ENSG00000160712	IL6R	1	cg24665000	14	42582755	10.917481995419687	2.3063041108647393e-27
ENSG00000160712	IL6R	1	cg25748542	3	119393058	-8.191553345594249	3.4352490214679154e-16
ENSG00000069424	KCNAB2	1	cg13925809	9	84646696	-8.543045897017295	1.8291856942794027e-17
ENSG00000069424	KCNAB2	1	cg13928313	7	2802073	-14.112745025916999	3.530016739865025e-44
ENSG00000117139	KDM5B	1	cg01620611	17	71306145	7.077376788865717	1.7257166590480345e-12
ENSG00000117139	KDM5B	1	cg05313153	8	119122430	7.023876514773598	2.5230255021997582e-12
ENSG00000117139	KDM5B	1	cg05368038	15	31621727	6.884114678761387	6.7187587142835016e-12
ENSG00000117139	KDM5B	1	cg05877497	2	66667946	7.151923408064221	1.0119710483302572e-12
ENSG00000117139	KDM5B	1	cg19743820	5	85913790	50.729386288944454	0
ENSG00000117139	KDM5B	1	cg25914270	5	85913777	28.268613657241428	1.6973075292715208e-160
ENSG00000117139	KDM5B	1	cg26537478	2	66668012	9.413480613236812	7.854136099240772e-21
ENSG00000076321	KLHL20	1	cg13849727	9	15810627	-19.130332426268954	3.7150747849924165e-78
ENSG00000157978	LDLRAP1	1	cg24623068	5	154317667	-19.51956498922139	3.832030117950171e-81
ENSG00000198799	LRIG2	1	cg17566920	6	141939449	7.118638811034855	1.2846629423098402e-12
ENSG00000132128	LRRC41	1	cg03492827	7	72838601	6.784208174815768	1.3379397602219128e-11
ENSG00000132128	LRRC41	1	cg12210255	7	72838671	6.89606661121165	6.183394194510549e-12
ENSG00000212916	MAP10	1	cg00953777	1	11714506	15.316731778234699	1.6240268445717493e-51
ENSG00000162576	MXRA8	1	cg06982628	22	38597918	9.283567224993138	2.6151187486796576e-20
ENSG00000162576	MXRA8	1	cg15271056	8	87520737	8.622331132849116	9.306000737773387e-18
ENSG00000142794	NBPF3	1	cg19638881	1	120395943	-11.332677144509839	2.5052783493293275e-29
ENSG00000142794	NBPF3	1	cg20858577	6	30036985	-9.148809376391764	8.934976655285109e-20
ENSG00000162711	NLRP3	1	cg00121209	19	54606151	-7.446635055378219	1.1648302369413998e-13
ENSG00000162711	NLRP3	1	cg14889079	19	54606153	-20.735573234954614	7.898400098630381e-91
ENSG00000162711	NLRP3	1	cg19219834	19	54610241	-11.237872078717617	7.118988948899153e-29
ENSG00000162600	OMA1	1	cg17179875	1	116961404	24.075482639447905	8.714676155889231e-120
ENSG00000143799	PARP1	1	cg21787323	11	85338252	7.532619253132122	6.104487712253355e-14
ENSG00000143799	PARP1	1	cg27539482	13	111589090	-33.9464875224723	2.292445054103194e-222
ENSG00000204138	PHACTR4	1	cg13071609	3	14336117	9.210488548451172	5.1002948438449944e-20
ENSG00000135845	PIGC	1	cg03745912	10	120924721	25.723403407686124	3.017295797983711e-135
ENSG00000143398	PIP5K1A	1	cg25754926	6	7986689	18.466898280138974	3.8714665785193224e-73
ENSG00000116711	PLA2G4A	1	cg15852841	15	55805949	7.44567309158186	1.1727261860408924e-13
ENSG00000149527	PLCH2	1	cg10374297	7	158066523	6.993143177421884	3.1344671246561098e-12
ENSG00000085998	POMGNT1	1	cg20693607	3	184319566	6.904968355502654	5.812057458818275e-12
ENSG00000131791	PRKAB2	1	cg02953927	15	44038812	-11.083776739873885	3.8215882909152957e-28
ENSG00000067606	PRKCZ	1	cg20148285	1	24018143	15.829175906511088	8.690831454902416e-55
ENSG00000067606	PRKCZ	1	cg20151207	17	57696971	7.999521692871549	1.6212052372196166e-15
ENSG00000142599	RERE	1	cg12525736	1	228269915	7.087512892290408	1.604831839969804e-12
ENSG00000168159	RNF187	1	cg05079548	7	128337621	-7.0972966932327886	1.4966843948547746e-12
ENSG00000168159	RNF187	1	cg05583632	22	25081868	7.732175247346535	1.3269427490354999e-14
ENSG00000187147	RNF220	1	cg01017464	18	47018095	-7.149639607246602	1.0289050629594743e-12
ENSG00000187147	RNF220	1	cg04388657	9	127623377	-8.156793413822143	4.556263711142524e-16
ENSG00000187147	RNF220	1	cg04761231	9	127623571	-6.979805516826809	3.443373017418491e-12
ENSG00000259834	RP11-284N8.3	1	cg15830792	10	64893214	15.62138257744951	1.8869320682327879e-53
ENSG00000269996	RP11-343N15.5	1	cg00454997	1	26222103	-7.105589608891804	1.4099257961598993e-12
ENSG00000269996	RP11-343N15.5	1	cg00646200	1	148855367	-40.58370074948284	2.786562739069795e-302
ENSG00000269996	RP11-343N15.5	1	cg02470959	12	132196036	-8.500982563243893	2.611209847342565e-17
ENSG00000269996	RP11-343N15.5	1	cg03593595	3	132977031	8.846470066091777	1.326433288008534e-18
ENSG00000269996	RP11-343N15.5	1	cg04935289	1	143767881	8.64875364070279	7.399958469082588e-18
ENSG00000269996	RP11-343N15.5	1	cg13574121	1	148855760	-7.9131669234600635	3.2157924793922814e-15
ENSG00000269996	RP11-343N15.5	1	cg15404665	19	4724679	-12.124831591433361	2.9359503555070212e-33
ENSG00000269996	RP11-343N15.5	1	cg20056341	15	49557625	-8.942640129525447	5.673414187297443e-19
ENSG00000269996	RP11-343N15.5	1	cg26681183	1	148855372	-13.786988671326473	2.7372946977871686e-42
ENSG00000260698	RP11-439E19.9	1	cg04279411	1	230645569	7.223268287517649	6.039235519464198e-13
ENSG00000224870	RP4-758J18.2	1	cg16196077	10	64028521	-10.110573918893442	9.53419113946192e-24
ENSG00000143653	SCCPDH	1	cg23496400	2	17721775	-9.742024794787351	3.500267760206559e-22
ENSG00000142669	SH3BGRL3	1	cg03487637	11	45940039	8.592508628668792	1.2005105802604167e-17
ENSG00000142669	SH3BGRL3	1	cg19403339	2	183580841	8.349100158742191	9.354931850000579e-17
ENSG00000085491	SLC25A24	1	cg01838916	5	85577056	19.07819031193875	9.386924946849973e-78
ENSG00000085491	SLC25A24	1	cg09032863	1	44412568	-9.797807172200894	2.044478745032563e-22
ENSG00000163866	SMIM12	1	cg12282830	22	29784441	-6.960347668274208	3.94509761763486e-12
ENSG00000162367	TAL1	1	cg00999644	16	20817639	6.954424012070751	4.1127045719630264e-12
ENSG00000169231	THBS3	1	cg05790982	4	4861404	-7.404320793414343	1.5987149614311185e-13
ENSG00000143155	TIPRL	1	cg25149069	1	233464229	8.930952889297753	6.298691016227635e-19
ENSG00000162542	TMCO4	1	cg18750937	12	67662516	11.075470332490386	4.190136809761363e-28
ENSG00000162542	TMCO4	1	cg18753664	12	124515061	33.50586981331551	2.713286096178618e-217
ENSG00000162542	TMCO4	1	cg18753962	13	45995831	18.379299476519467	1.661544687770869e-72
ENSG00000162542	TMCO4	1	cg18756771	10	112261994	13.250183149934786	2.960754173636183e-39
ENSG00000171729	TMEM51	1	cg11158179	1	61543011	-7.028202666424708	2.44611024386602e-12
ENSG00000186283	TOR3A	1	cg04525335	16	85877183	-13.420825836964447	3.2933960030271842e-40
ENSG00000158109	TPRG1L	1	cg20075270	10	46168220	-21.7069855911227	6.650417306574649e-99
ENSG00000215912	TTC34	1	cg05998672	11	986408	-10.618568955812666	5.385143373789451e-26
ENSG00000215912	TTC34	1	cg06780875	7	116331685	-8.452447570469431	3.939019637450098e-17
ENSG00000085831	TTC39A	1	cg27110877	5	77940704	12.828142899072	5.976923387433109e-37
ENSG00000116213	WRAP73	1	cg10434075	17	55038112	-16.728381670736194	8.754037120975251e-61
ENSG00000116213	WRAP73	1	cg20075270	10	46168220	-26.56977024461321	1.8022314827496908e-143
ENSG00000134684	YARS	1	cg03035248	3	50540699	12.785208691408096	1.0185875742237775e-36
ENSG00000134684	YARS	1	cg27618483	2	155433424	10.870771876776043	3.77424010726796e-27
ENSG00000185278	ZBTB37	1	cg13849727	9	15810627	-25.082633656211407	3.807511584971926e-129
ENSG00000160094	ZNF362	1	cg02063817	7	27253521	7.096059382711713	1.5097294294037021e-12
ENSG00000160094	ZNF362	1	cg05756918	7	27253707	7.109096098163539	1.3753869461021964e-12
ENSG00000160094	ZNF362	1	cg12187687	7	27253834	6.784274205471871	1.3368403228970396e-11
ENSG00000160094	ZNF362	1	cg18180846	10	102990855	7.684203615560181	1.9212820555232814e-14
ENSG00000125945	ZNF436	1	cg11294761	17	80275530	-6.83047014315533	9.738021289233598e-12
ENSG00000188295	ZNF669	1	cg00550498	19	12251208	8.681178110852398	5.600509814343216e-18
ENSG00000188295	ZNF669	1	cg27348863	6	169484769	13.115419396142071	1.6377421813448142e-38
ENSG00000235192	AC009495.2	2	cg14011387	9	134228590	-11.749073533891574	2.303014629898934e-31
ENSG00000186235	AC016757.3	2	cg01134436	17	81009848	9.521401501422805	2.8556849993708e-21
ENSG00000226321	AC104809.3	2	cg26822986	18	21199691	8.423524403067555	5.0233198313582686e-17
ENSG00000144218	AFF3	2	cg14165692	2	111367744	10.336064931582214	9.841261890016686e-25
ENSG00000173209	AHSA2	2	cg02765363	17	80200741	-7.773447872362849	9.62890634440705e-15
ENSG00000173209	AHSA2	2	cg19393755	17	71258101	-6.996622268444785	3.0569348312887714e-12
ENSG00000173209	AHSA2	2	cg26023268	17	71258215	-7.0394460211815515	2.258498729072908e-12
ENSG00000153107	ANAPC1	2	cg23229568	2	234663729	-10.247329109770094	2.415491056072653e-24
ENSG00000168397	ATG4B	2	cg17769387	4	84031278	-8.009638833013963	1.4934573024438652e-15
ENSG00000153563	CD8A	2	cg05746288	18	48405273	-9.54707239004357	2.2423200884549632e-21
ENSG00000172116	CD8B	2	cg05746288	18	48405273	10.6143314179008	5.616276501914696e-26
ENSG00000172116	CD8B	2	cg11704396	3	48723701	7.517026422931264	6.866514081503127e-14
ENSG00000172116	CD8B	2	cg22448292	15	90234075	7.755787790673669	1.1046970769823355e-14
ENSG00000144354	CDCA7	2	cg00672093	2	139654844	7.308750552168988	3.2341635672568324e-13
ENSG00000144354	CDCA7	2	cg01148073	16	82126267	6.867289977945465	7.545871107016529e-12
ENSG00000144354	CDCA7	2	cg01185573	3	135432551	7.382944233534757	1.870728347299604e-13
ENSG00000144354	CDCA7	2	cg01311802	6	29430435	6.797851181302488	1.2178458469173965e-11
ENSG00000144354	CDCA7	2	cg01702210	14	58064926	8.192486408263617	3.4005252091703814e-16
ENSG00000144354	CDCA7	2	cg01890568	17	31437649	7.664076720669832	2.242198680702363e-14
ENSG00000144354	CDCA7	2	cg02204261	4	134787901	7.015801534396133	2.6696259176893235e-12
ENSG00000144354	CDCA7	2	cg02624836	2	67312537	7.466970330918836	1.0000645560067081e-13
ENSG00000144354	CDCA7	2	cg03078733	17	14822587	7.5912482595034545	3.9125014749181354e-14
ENSG00000144354	CDCA7	2	cg03625515	16	18157108	8.406638176191077	5.779574135287816e-17
ENSG00000144354	CDCA7	2	cg03804083	3	168891416	7.807607276783987	7.376053577613405e-15
ENSG00000144354	CDCA7	2	cg04157272	2	68017838	7.415144436689923	1.4727337489917807e-13
ENSG00000144354	CDCA7	2	cg04226903	4	187544998	7.701048444260775	1.686952939082099e-14
ENSG00000144354	CDCA7	2	cg04307853	17	6021418	7.635977424359741	2.7811020458280658e-14
ENSG00000144354	CDCA7	2	cg05121182	3	123812381	7.8457046057520525	5.4732779020069695e-15
ENSG00000144354	CDCA7	2	cg05399607	7	34874533	6.8681960870474565	7.498659094929656e-12
ENSG00000144354	CDCA7	2	cg05614028	18	44785758	7.0506161462845	2.086189377630443e-12
ENSG00000144354	CDCA7	2	cg05775492	16	86258717	8.035455315792055	1.2135117404971878e-15
ENSG00000144354	CDCA7	2	cg05851730	5	45204945	7.5191648828455815	6.754984744816344e-14
ENSG00000144354	CDCA7	2	cg06943845	2	6507982	8.226504306721747	2.573558005143838e-16
ENSG00000144354	CDCA7	2	cg07339864	7	70561125	7.64040319985727	2.688468178520571e-14
ENSG00000144354	CDCA7	2	cg07450292	3	76419070	6.815083027846057	1.0819053617634924e-11
ENSG00000144354	CDCA7	2	cg08442713	5	117822219	6.930412375264166	4.86425683603977e-12
ENSG00000144354	CDCA7	2	cg08493762	21	42222713	8.938200765315976	5.902529195458383e-19
ENSG00000144354	CDCA7	2	cg08942929	15	29825426	7.344504356539234	2.4858317339808215e-13
ENSG00000144354	CDCA7	2	cg09196534	7	77975971	7.834878566079127	5.958395052554823e-15
ENSG00000144354	CDCA7	2	cg09323806	7	141617279	6.902357193009663	5.915254258068757e-12
ENSG00000144354	CDCA7	2	cg09959790	13	59616937	6.918113605706514	5.300288906991538e-12
ENSG00000144354	CDCA7	2	cg10153214	16	71571146	6.836454832743708	9.338282754210171e-12
ENSG00000144354	CDCA7	2	cg10310168	1	4376380	7.5343120009674465	6.025090526434718e-14
ENSG00000144354	CDCA7	2	cg10325509	10	24269469	7.04777364137763	2.1287100050476557e-12
ENSG00000144354	CDCA7	2	cg10453777	13	62245229	7.155503987892556	9.855752296984673e-13
ENSG00000144354	CDCA7	2	cg10907582	14	96411400	6.915352280770857	5.4033338712841035e-12
ENSG00000144354	CDCA7	2	cg10962805	2	125672110	7.38834091054153	1.7973358389087423e-13
ENSG00000144354	CDCA7	2	cg11005831	5	15928441	6.822901349303587	1.0252428625100736e-11
ENSG00000144354	CDCA7	2	cg11388802	1	181577847	7.7372984158626865	1.2746812553139732e-14
ENSG00000144354	CDCA7	2	cg11751344	8	92622592	7.049201674093875	2.1072430411929983e-12
ENSG00000144354	CDCA7	2	cg12045030	2	220865785	8.130310944412608	5.642940199093785e-16
ENSG00000144354	CDCA7	2	cg12101474	7	118427418	7.281851594648941	3.9391404372943004e-13
ENSG00000144354	CDCA7	2	cg12324708	5	130329173	7.166725187602757	9.090377978007211e-13
ENSG00000144354	CDCA7	2	cg13005228	5	134987654	7.27035887976077	4.284507497845289e-13
ENSG00000144354	CDCA7	2	cg13298997	7	32038956	6.922529963980411	5.139474875459753e-12
ENSG00000144354	CDCA7	2	cg13471209	1	82165326	6.815967152120026	1.0753469673811468e-11
ENSG00000144354	CDCA7	2	cg13593284	9	74761911	7.7619199138691295	1.0530136746379178e-14
ENSG00000144354	CDCA7	2	cg13797580	2	215494121	7.498822949148779	7.873519989055385e-14
ENSG00000144354	CDCA7	2	cg14014950	3	64125334	7.778365284526125	9.26573138545913e-15
ENSG00000144354	CDCA7	2	cg14444650	2	19406301	6.84061561362798	9.074034901088866e-12
ENSG00000144354	CDCA7	2	cg14660328	11	79878290	8.737070837659378	3.449790499830651e-18
ENSG00000144354	CDCA7	2	cg14790000	5	127805611	7.071695614198181	1.7958380875779643e-12
ENSG00000144354	CDCA7	2	cg15359390	2	79365892	7.056705998689682	1.9978780896030115e-12
ENSG00000144354	CDCA7	2	cg15396204	1	107348393	6.979485529016156	3.4485395236957865e-12
ENSG00000144354	CDCA7	2	cg15442888	4	175789139	6.987944140192097	3.249277359217292e-12
ENSG00000144354	CDCA7	2	cg15985891	1	66323190	7.212582275591564	6.524865981690583e-13
ENSG00000144354	CDCA7	2	cg16086730	5	9782142	7.544309279560993	5.58644349427997e-14
ENSG00000144354	CDCA7	2	cg16418228	3	54963186	6.996775868539637	3.053281174212073e-12
ENSG00000144354	CDCA7	2	cg16531181	10	130185387	6.793122865094846	1.2579855789472171e-11
ENSG00000144354	CDCA7	2	cg17144548	2	5679308	6.909549719152537	5.6263116596618e-12
ENSG00000144354	CDCA7	2	cg17346345	2	79743491	7.527864268330544	6.325784039554096e-14
ENSG00000144354	CDCA7	2	cg17689601	10	83651137	7.793674643668611	8.223631880748302e-15
ENSG00000144354	CDCA7	2	cg17804071	3	73596205	8.309593983351812	1.2971157026802652e-16
ENSG00000144354	CDCA7	2	cg18387985	11	15350125	8.0240940796068	1.3293137746973902e-15
ENSG00000144354	CDCA7	2	cg18484189	11	7984973	6.987963659053713	3.2488308714991957e-12
ENSG00000144354	CDCA7	2	cg19631651	3	55005522	7.437821740150436	1.243673146161641e-13
ENSG00000144354	CDCA7	2	cg20316883	8	138493473	6.995724370529011	3.07599380424667e-12
ENSG00000144354	CDCA7	2	cg20480334	11	78799391	7.453328674554617	1.1075953907585453e-13
ENSG00000144354	CDCA7	2	cg21150108	13	34750105	6.9692861287687755	3.704794904768639e-12
ENSG00000144354	CDCA7	2	cg21395077	9	118687465	6.875133115896122	7.1466800941021906e-12
ENSG00000144354	CDCA7	2	cg22379436	3	73789574	7.112333751077818	1.3436153221901927e-12
ENSG00000144354	CDCA7	2	cg23411426	8	36955985	7.07688385246184	1.7306912784037227e-12
ENSG00000144354	CDCA7	2	cg23715749	1	37413867	7.2485732801831	5.022739189627787e-13
ENSG00000144354	CDCA7	2	cg23912509	12	97957406	7.07647946696028	1.7356845355368574e-12
ENSG00000144354	CDCA7	2	cg24270629	18	50823537	7.031073277798572	2.3962535451710154e-12
ENSG00000144354	CDCA7	2	cg24294950	7	126752911	7.673041116955973	2.0929728331977787e-14
ENSG00000144354	CDCA7	2	cg24346464	1	164872273	7.923519607939965	2.963069552880975e-15
ENSG00000144354	CDCA7	2	cg24520479	4	163906031	6.853686001500168	8.290725237745227e-12
ENSG00000144354	CDCA7	2	cg25879062	11	130386122	6.961162549116531	3.9221759709714635e-12
ENSG00000144354	CDCA7	2	cg26094484	10	133318755	6.966880359030327	3.767909332625871e-12
ENSG00000144354	CDCA7	2	cg26837853	8	3970118	8.154279772354414	4.644050139191103e-16
ENSG00000144354	CDCA7	2	cg27574973	7	78218446	7.914008492366021	3.1948369240806842e-15
ENSG00000115561	CHMP3	2	cg09409356	1	163468474	-9.989486226233511	3.155535998821862e-23
ENSG00000115561	CHMP3	2	cg20908556	4	124606293	-10.16555463329639	5.4983167693033654e-24
ENSG00000144524	COPS7B	2	cg01370599	3	116745421	-11.680038596003618	5.07280628578706e-31
ENSG00000119772	DNMT3A	2	cg01120308	11	85780971	8.358921217686836	8.615202870692652e-17
ENSG00000119772	DNMT3A	2	cg01942927	1	212588536	7.111894532100123	1.34828042392242e-12
ENSG00000119772	DNMT3A	2	cg12869229	12	56618373	6.864723391793808	7.683345000186775e-12
ENSG00000119772	DNMT3A	2	cg15995296	11	67210812	7.17122619762119	8.802977860639388e-13
ENSG00000119772	DNMT3A	2	cg22333846	19	17580131	7.214463158098297	6.438643372981483e-13
ENSG00000188542	DUSP28	2	cg08817644	19	20150334	7.325894012207147	2.8524836523194506e-13
ENSG00000197872	FAM49A	2	cg11254532	1	61520399	-17.240687490285147	2.5110640741698805e-64
ENSG00000163013	FBXO41	2	cg23020402	6	24666573	-7.605954277401835	3.4991808893759546e-14
ENSG00000005436	GCFC2	2	cg03425731	12	8665044	14.07795986984735	5.616509176645212e-44
ENSG00000178295	GEN1	2	cg05000488	7	23749740	-21.70162448542761	7.209972263574569e-99
ENSG00000068024	HDAC4	2	cg02058194	22	41215556	10.057270681951348	1.612537158788793e-23
ENSG00000150540	HNMT	2	cg22542120	4	133045158	-10.97608133417449	1.2201103360097935e-27
ENSG00000150540	HNMT	2	cg25299176	17	1303341	-9.772975617238439	2.5948425587006567e-22
ENSG00000163596	ICA1L	2	cg04090794	1	92099858	9.768254019469351	2.71797208640817e-22
ENSG00000125629	INSIG2	2	cg12284736	1	80603921	-7.577500029848471	4.343410967601865e-14
ENSG00000172059	KLF11	2	cg04130656	6	6606765	7.1397065556550485	1.1043747138370851e-12
ENSG00000115919	KYNU	2	cg15021882	7	16542142	7.747724246535558	1.1755108698717242e-14
ENSG00000124831	LRRFIP1	2	cg12512271	3	178976891	9.63310791281529	9.92159400970535e-22
ENSG00000172005	MAL	2	cg02973320	1	162467753	-10.125769956637669	8.159593925750893e-24
ENSG00000247626	MARS2	2	cg06799605	2	174146611	9.341396314965607	1.5302456023253443e-20
ENSG00000124370	MCEE	2	cg06263740	8	12565344	10.90719358031588	2.558821135345646e-27
ENSG00000116062	MSH6	2	cg23944298	3	127248864	7.609303607726991	3.4100518175534277e-14
ENSG00000173272	MZT2A	2	cg00677195	10	7661611	17.413073847865647	1.5473054219264746e-65
ENSG00000173272	MZT2A	2	cg10997922	18	55470506	-10.730283002263686	1.6660343671336592e-26
ENSG00000173272	MZT2A	2	cg24630195	5	2748369	-19.67560810621324	2.262718503139924e-82
ENSG00000091106	NLRC4	2	cg00322666	3	87994995	-6.792789818543678	1.2609460811632765e-11
ENSG00000115687	PASK	2	cg08612384	17	27228511	-11.018575148142789	7.7566537816270125e-28
ENSG00000125618	PAX8	2	cg05725004	1	76082568	-7.635036940451476	2.8023779042025335e-14
ENSG00000125618	PAX8	2	cg09260603	1	206809102	-12.180344858060867	1.529815757691884e-33
ENSG00000125618	PAX8	2	cg20257372	17	1945152	-11.345087748655283	2.182548244869921e-29
ENSG00000156973	PDE6D	2	cg01370599	3	116745421	-9.110145647295317	1.2670953260657761e-19
ENSG00000143870	PDIA6	2	cg25804018	8	140716671	-9.305096744842087	2.1404541595443884e-20
ENSG00000163803	PLB1	2	cg04222728	7	138549665	-7.070029776396918	1.8176903202743752e-12
ENSG00000163803	PLB1	2	cg23261319	2	182713409	-7.095478553734494	1.5160659912511638e-12
ENSG00000163803	PLB1	2	cg24974982	22	46403316	-6.850736980363627	8.463220861678876e-12
ENSG00000163803	PLB1	2	cg27661394	4	4661952	-7.846548345672751	5.439073108346238e-15
ENSG00000180228	PRKRA	2	cg14011486	1	26737247	11.0585812547046	5.018342617961141e-28
ENSG00000180228	PRKRA	2	cg18634211	1	26737262	9.938026217665554	5.2194366994426234e-23
ENSG00000144134	RABL2A	2	cg19565306	22	51222011	15.97982599485828	8.844888532529989e-56
ENSG00000144134	RABL2A	2	cg22012975	22	51222043	14.130991671012161	2.75017274807992e-44
ENSG00000155636	RBM45	2	cg12665724	11	43364829	-10.140910196341677	7.020213460152404e-24
ENSG00000155636	RBM45	2	cg20512924	13	22021376	8.071224327998962	9.102566100313225e-16
ENSG00000260804	RP11-566E18.3	2	cg05607577	6	43544120	12.799019447243627	8.562852032318918e-37
ENSG00000153574	RPIA	2	cg08581953	13	25593057	-8.885009892496376	9.44672353124635e-19
ENSG00000035115	SH3YL1	2	cg07031794	2	26568949	-15.840537669728375	7.129352573489919e-55
ENSG00000035115	SH3YL1	2	cg11347411	7	150020925	-46.258643252124784	0
ENSG00000035115	SH3YL1	2	cg12354986	22	38142174	-13.425067950884653	3.110346232421503e-40
ENSG00000035115	SH3YL1	2	cg22324358	7	2583541	16.526484606908085	2.0355721094564376e-59
ENSG00000035115	SH3YL1	2	cg24475146	1	154530781	-29.28220379709324	4.396877748846503e-171
ENSG00000196950	SLC39A10	2	cg19368679	12	120555201	-9.747223115951915	3.3259014366773006e-22
ENSG00000196950	SLC39A10	2	cg19369556	16	82661725	-13.404261914096264	4.068989739912804e-40
ENSG00000079263	SP140	2	cg18745131	7	1269963	7.105481413760377	1.411356488975587e-12
ENSG00000198369	SPRED2	2	cg08951638	5	141706213	-7.215896838984245	6.370661199116214e-13
ENSG00000151353	TMEM18	2	cg11083276	6	24911313	9.376497271309319	1.105126269170438e-20
ENSG00000151353	TMEM18	2	cg12228919	15	44955936	10.067759232333168	1.452197319600058e-23
ENSG00000151353	TMEM18	2	cg18912160	10	3281074	-8.29598585526427	1.4514705020836604e-16
ENSG00000226479	TMEM185B	2	cg24778081	11	506932	-7.483302314918891	8.848945723050768e-14
ENSG00000189362	TMEM194B	2	cg13357708	6	7986216	-10.34278878572511	9.187948920979928e-25
ENSG00000204104	TRAF3IP1	2	cg01405143	19	9649327	-11.709926369095468	3.6088909240013464e-31
ENSG00000204104	TRAF3IP1	2	cg07594831	8	101315560	-9.959658392216316	4.224280663320298e-23
ENSG00000204104	TRAF3IP1	2	cg16021909	1	248021091	-11.897687976985628	4.172989551613247e-32
ENSG00000204104	TRAF3IP1	2	cg17784811	6	31079617	-12.215283267716533	1.0105026828056315e-33
ENSG00000071575	TRIB2	2	cg01890083	4	183966200	9.32273848450417	1.8172353024098828e-20
ENSG00000032389	TSSC1	2	cg20313246	10	134997471	9.583069105150573	1.5941587400627574e-21
ENSG00000032389	TSSC1	2	cg27344576	8	109260414	-7.452683443498888	1.1129000197542081e-13
ENSG00000123607	TTC21B	2	cg14011387	9	134228590	15.644598917526599	1.3189054000422683e-53
ENSG00000184182	UBE2F	2	cg06893834	19	19843560	-9.782311764425769	2.374274921462366e-22
ENSG00000184182	UBE2F	2	cg16319085	4	85076551	-11.375811139435815	1.5511105769646813e-29
ENSG00000118965	WDR35	2	cg06625576	17	40179813	8.23446283641539	2.411109215798989e-16
ENSG00000114770	ABCC5	3	cg01268824	19	58220818	7.790204811422398	8.457480012529158e-15
ENSG00000114770	ABCC5	3	cg01832549	1	19774989	-7.697186815014597	1.739567904142648e-14
ENSG00000114770	ABCC5	3	cg03234186	19	58220657	8.44005840456749	4.3720397580941475e-17
ENSG00000114770	ABCC5	3	cg08668790	19	58220662	8.092952223799221	7.645499566152574e-16
ENSG00000114770	ABCC5	3	cg11294513	19	58220295	6.934996536130284	4.7138325355995874e-12
ENSG00000114770	ABCC5	3	cg12506930	19	58220718	7.3983609982789496	1.6698315103738553e-13
ENSG00000114770	ABCC5	3	cg26465391	19	58220773	7.076679764905923	1.7343764764004092e-12
ENSG00000114770	ABCC5	3	cg27049766	19	58220516	6.946844830335558	4.338877606133885e-12
ENSG00000114770	ABCC5	3	cg27324426	19	58220837	7.226691245192518	5.893959955159357e-13
ENSG00000163686	ABHD6	3	cg11805559	10	134859687	-30.477598373999097	8.984947875545086e-184
ENSG00000069849	ATP1B3	3	cg23519930	2	60963021	-7.918774438365436	3.0771156316013997e-15
ENSG00000113916	BCL6	3	cg01032851	16	68994912	7.123818331925384	1.2375020425537915e-12
ENSG00000113916	BCL6	3	cg01512113	1	1680232	7.681670865266346	1.9585678865934068e-14
ENSG00000113916	BCL6	3	cg03998636	13	111210121	10.589078475113373	7.296923231561759e-26
ENSG00000113916	BCL6	3	cg06773488	18	74726002	6.806359718705683	1.148752289626353e-11
ENSG00000113916	BCL6	3	cg07081759	10	126330905	7.019081950716797	2.6084375131049747e-12
ENSG00000113916	BCL6	3	cg08851837	16	57558820	8.812093542690258	1.7935048031586418e-18
ENSG00000113916	BCL6	3	cg09743650	16	85675160	7.290431890294065	3.699271391751843e-13
ENSG00000113916	BCL6	3	cg10013455	10	134400191	7.223247982881693	6.038835129334912e-13
ENSG00000113916	BCL6	3	cg10967866	10	134362164	7.902067500894377	3.5112288409661517e-15
ENSG00000113916	BCL6	3	cg12120406	17	25822056	8.204436802534268	3.083816159443811e-16
ENSG00000113916	BCL6	3	cg13380995	6	37670128	8.767301067710022	2.6521209756540885e-18
ENSG00000113916	BCL6	3	cg13821176	8	126448338	8.093426313457872	7.607620146853963e-16
ENSG00000113916	BCL6	3	cg14009440	1	45138784	8.571527391548491	1.4341444171789743e-17
ENSG00000113916	BCL6	3	cg14237301	16	28506477	9.78446667233519	2.323769247525774e-22
ENSG00000113916	BCL6	3	cg17192599	7	151504864	6.896451437114335	6.163339081554681e-12
ENSG00000113916	BCL6	3	cg18222865	11	14664689	7.813281418923752	7.056067902116081e-15
ENSG00000113916	BCL6	3	cg19137806	10	134362170	8.443207539442154	4.2521018246587896e-17
ENSG00000113916	BCL6	3	cg21346154	2	70699808	7.659187761025855	2.3279448687303253e-14
ENSG00000113916	BCL6	3	cg22448090	1	200978598	8.407786839767537	5.724233277787853e-17
ENSG00000113916	BCL6	3	cg24695071	7	2419958	7.593086427179133	3.85814675247803e-14
ENSG00000113916	BCL6	3	cg26426564	10	134371746	7.9605167562753305	2.208843187744809e-15
ENSG00000113916	BCL6	3	cg26468118	13	111175670	7.698604364877336	1.7190523431496702e-14
ENSG00000113916	BCL6	3	cg26508444	10	126330845	8.294145377596799	1.4740587754730857e-16
ENSG00000113916	BCL6	3	cg27262415	11	67205166	-6.89962274881231	6.028879207278976e-12
ENSG00000113916	BCL6	3	cg27389255	11	14664598	9.473580601001077	4.47159835309464e-21
ENSG00000144712	CAND2	3	cg22611419	17	77070824	10.494688978928215	1.9403853286197809e-25
ENSG00000244607	CCDC13	3	cg11293112	17	17809020	-12.84234319861453	5.013607166175951e-37
ENSG00000163528	CHCHD4	3	cg14367344	1	146644336	-13.45797324640491	2.040921879039117e-40
ENSG00000178700	DHFRL1	3	cg02491787	7	102739136	-7.63493537214164	2.8029201568287318e-14
ENSG00000138246	DNAJC13	3	cg26709343	16	69373945	-8.95229083893865	5.207445221034577e-19
ENSG00000132394	EEFSEC	3	cg19802243	6	160321205	7.778683183433121	9.249696485399531e-15
ENSG00000132394	EEFSEC	3	cg19805863	1	246254338	55.9089007377747	0
ENSG00000236438	FAM157A	3	cg13412283	7	65280	7.6049501112155395	3.52459570059533e-14
ENSG00000185112	FAM43A	3	cg13711851	9	124080947	-8.254321302527645	2.0482667768797308e-16
ENSG00000185112	FAM43A	3	cg14263575	9	95530146	-8.668431819261407	6.250314245994735e-18
ENSG00000168827	GFM1	3	cg23275840	4	47708675	13.149588319637594	1.058233448385566e-38
ENSG00000170266	GLB1	3	cg16660899	1	167095593	6.898837213627579	6.063432579076621e-12
ENSG00000082701	GSK3B	3	cg02809009	19	50354510	16.430742518181447	9.058830665718838e-59
ENSG00000163754	GYG1	3	cg24089360	19	57699963	-42.10914591351554	1.72e-321
ENSG00000163755	HPS3	3	cg24089360	19	57699963	-7.193991826396995	7.465786891400261e-13
ENSG00000172037	LAMB2	3	cg03492460	6	88441469	6.808830395136309	1.1305390512258028e-11
ENSG00000242086	LINC00969	3	cg04481584	5	231809	-14.907382242455368	5.864857729570868e-49
ENSG00000242086	LINC00969	3	cg07608658	3	9851477	22.573603327456404	2.475678862087147e-106
ENSG00000242086	LINC00969	3	cg17016932	5	1654343	11.818545377611958	1.0424416929532074e-31
ENSG00000242086	LINC00969	3	cg17482712	5	218077	7.667980202427641	2.177504432786157e-14
ENSG00000242086	LINC00969	3	cg17952111	19	54960355	16.350459599870895	3.1469796320017626e-58
ENSG00000242086	LINC00969	3	cg20365451	2	242961267	-13.176877023997095	7.534318042595085e-39
ENSG00000242086	LINC00969	3	cg20990478	5	272354	30.413517967290407	4.859860775642943e-183
ENSG00000242086	LINC00969	3	cg24069048	5	256469	-11.634834217578199	8.495670891630976e-31
ENSG00000093167	LRRFIP2	3	cg02012712	14	20779703	7.189518070524067	7.71229361433723e-13
ENSG00000176945	MUC20	3	cg07608658	3	9851477	-16.210775365660076	2.676011530053798e-57
ENSG00000176945	MUC20	3	cg17952111	19	54960355	-16.573748993845538	9.917215018311558e-60
ENSG00000176945	MUC20	3	cg20990478	5	272354	-6.959395425041325	3.972860062058592e-12
ENSG00000144909	OSBPL11	3	cg21903625	3	12810386	7.321386766489287	2.9477302426581783e-13
ENSG00000151093	OXSM	3	cg27474149	6	29572333	-14.052433899459219	7.908668581877852e-44
ENSG00000144647	POMGNT2	3	cg11293112	17	17809020	10.084245527531019	1.2345759874174016e-23
ENSG00000168297	PXK	3	cg11805559	10	134859687	-26.852467403355497	2.922614592308016e-146
ENSG00000168028	RPSA	3	cg26457421	3	56591241	10.17119245977478	5.185706313334412e-24
ENSG00000138468	SENP7	3	cg00298065	19	58715577	12.981518305433536	8.829505610578207e-38
ENSG00000138468	SENP7	3	cg00541956	19	58455018	-12.730319968331107	2.0008869767842824e-36
ENSG00000138468	SENP7	3	cg00569896	4	204382	-15.813700466109042	1.0718784364301333e-54
ENSG00000138468	SENP7	3	cg00578032	19	38308069	-9.856951503029768	1.1519725385277875e-22
ENSG00000138468	SENP7	3	cg00647741	19	58693450	-13.507033047049863	1.0790712264764329e-40
ENSG00000138468	SENP7	3	cg00880079	19	37157318	-7.26060235060481	4.601714692933066e-13
ENSG00000138468	SENP7	3	cg01268824	19	58220818	-16.661149597967466	2.5132567040232673e-60
ENSG00000138468	SENP7	3	cg01436998	19	38308263	-8.091190502010427	7.748383480350999e-16
ENSG00000138468	SENP7	3	cg01501009	19	57183268	-10.098441260472178	1.0719745287177171e-23
ENSG00000138468	SENP7	3	cg01586208	19	22806647	7.936610416272732	2.6716030785885007e-15
ENSG00000138468	SENP7	3	cg01644850	19	58193231	-10.298773526150086	1.4356392329185884e-24
ENSG00000138468	SENP7	3	cg01947224	19	58089885	-8.563188516423907	1.5403297427837003e-17
ENSG00000138468	SENP7	3	cg02280912	19	58400095	-19.499232840103975	5.413019502302389e-81
ENSG00000138468	SENP7	3	cg02348449	19	58630429	-7.181618929380802	8.165383691880799e-13
ENSG00000138468	SENP7	3	cg02940165	19	57149563	-10.570693197997164	8.838607486912027e-26
ENSG00000138468	SENP7	3	cg03007201	19	57875238	-10.104757030783732	1.0067031261078022e-23
ENSG00000138468	SENP7	3	cg03077453	19	52900914	-8.701207036227004	4.7092005401933414e-18
ENSG00000138468	SENP7	3	cg03092271	19	23945472	-9.324153306581033	1.7953181029740614e-20
ENSG00000138468	SENP7	3	cg03142586	19	58220080	-8.036841935095175	1.2003884807095834e-15
ENSG00000138468	SENP7	3	cg03234186	19	58220657	-20.574042384942686	1.6127753054951723e-89
ENSG00000138468	SENP7	3	cg03562414	19	52391078	-11.745261046517284	2.4097824224381503e-31
ENSG00000138468	SENP7	3	cg03584535	19	58280832	-11.008184915546861	8.652685405463416e-28
ENSG00000138468	SENP7	3	cg03975694	19	38042472	-9.034597131817447	2.499956464970143e-19
ENSG00000138468	SENP7	3	cg04062087	19	58666832	-7.0259968621989275	2.484309826104864e-12
ENSG00000138468	SENP7	3	cg04206284	7	64127516	-7.5830354803787845	4.16555997856558e-14
ENSG00000138468	SENP7	3	cg04358463	19	56215104	-7.243055744276032	5.22962018348795e-13
ENSG00000138468	SENP7	3	cg04684267	19	58694502	-19.444526216259437	1.4367626043035345e-80
ENSG00000138468	SENP7	3	cg04818919	19	37998171	-8.693121710508255	5.050216649369702e-18
ENSG00000138468	SENP7	3	cg05023114	19	58176305	7.651929273504736	2.461759566284181e-14
ENSG00000138468	SENP7	3	cg05220114	19	58223693	-13.913102426018611	5.1388309232889385e-43
ENSG00000138468	SENP7	3	cg05280698	19	37825388	-12.915992427536121	2.0034937118922918e-37
ENSG00000138468	SENP7	3	cg05508084	19	56988398	-6.9521072153231245	4.179864913532344e-12
ENSG00000138468	SENP7	3	cg05661282	19	58220370	-14.480427126262457	2.3084501101417375e-46
ENSG00000138468	SENP7	3	cg05974498	19	52599256	-10.041999412223548	1.8762798751605727e-23
ENSG00000138468	SENP7	3	cg05983315	19	58545837	-7.617815167847696	3.1959410981749e-14
ENSG00000138468	SENP7	3	cg06368093	19	58513526	-9.69924529079228	5.276317336473623e-22
ENSG00000138468	SENP7	3	cg06442489	19	58630612	-10.440458605247054	3.3875396547463235e-25
ENSG00000138468	SENP7	3	cg06458239	19	58038573	-8.289032491414035	1.5381569333987276e-16
ENSG00000138468	SENP7	3	cg06484123	19	53107200	-10.532376578004241	1.3144823198145996e-25
ENSG00000138468	SENP7	3	cg06585566	19	57276794	-7.983035252115301	1.8465062602614537e-15
ENSG00000138468	SENP7	3	cg06615754	19	58193071	-21.678864108380335	1.1530929856408721e-98
ENSG00000138468	SENP7	3	cg06707978	19	58095155	-7.654591823644474	2.4120071099430713e-14
ENSG00000138468	SENP7	3	cg06878361	19	52390810	-8.790352513945455	2.169820873844847e-18
ENSG00000138468	SENP7	3	cg06940614	19	38182773	-10.994202540761947	1.0058523483173938e-27
ENSG00000138468	SENP7	3	cg06942685	19	56879432	-7.932492279065406	2.7603217715485e-15
ENSG00000138468	SENP7	3	cg07172885	12	133757907	-7.274808073849814	4.1481416535608346e-13
ENSG00000138468	SENP7	3	cg07237326	19	37742739	-10.16630386082526	5.447504688869793e-24
ENSG00000138468	SENP7	3	cg07474494	19	58446600	-14.121592969949218	3.1230009580590055e-44
ENSG00000138468	SENP7	3	cg07685728	19	58280891	-12.623618340719958	7.406451932878039e-36
ENSG00000138468	SENP7	3	cg07788092	19	9473691	-7.658612197618381	2.3387516077137673e-14
ENSG00000138468	SENP7	3	cg07808761	19	37329760	-8.331601302160573	1.0810023815254116e-16
ENSG00000138468	SENP7	3	cg07815836	19	58715351	11.338050461228285	2.3571064712490217e-29
ENSG00000138468	SENP7	3	cg07816786	19	37063800	-8.995730849059655	3.5390448429547445e-19
ENSG00000138468	SENP7	3	cg07894352	19	44763993	-8.434475491442367	4.577374580228181e-17
ENSG00000138468	SENP7	3	cg08103220	16	2977336	-10.83359206759178	5.5981791291201226e-27
ENSG00000138468	SENP7	3	cg08146323	19	57183118	-10.414520766777162	4.418681498916423e-25
ENSG00000138468	SENP7	3	cg08158952	19	57183016	-11.712976776095994	3.4844933459596505e-31
ENSG00000138468	SENP7	3	cg08333333	19	57182844	-10.258073460935995	2.1663433818039723e-24
ENSG00000138468	SENP7	3	cg08527195	1	161442697	8.908870401073598	7.656664820229431e-19
ENSG00000138468	SENP7	3	cg08648727	19	58446436	-8.293149759751307	1.4866810495336846e-16
ENSG00000138468	SENP7	3	cg08668790	19	58220662	-18.386022837542708	1.4632487021818496e-72
ENSG00000138468	SENP7	3	cg09013032	4	88225834	7.326635515075168	2.836188333025559e-13
ENSG00000138468	SENP7	3	cg09259115	19	37288793	-7.334938860190462	2.667957234063786e-13
ENSG00000138468	SENP7	3	cg09279169	19	38147309	-9.311156799658418	2.0239676637195097e-20
ENSG00000138468	SENP7	3	cg09547119	19	52391367	-11.292887992293224	3.8827253046979176e-29
ENSG00000138468	SENP7	3	cg09578475	19	9473688	-7.179239236295021	8.306933316031788e-13
ENSG00000138468	SENP7	3	cg09643544	19	9473696	-7.964387339210297	2.1423693852623494e-15
ENSG00000138468	SENP7	3	cg10051935	19	58740549	-11.236456303819917	7.225329550212737e-29
ENSG00000138468	SENP7	3	cg10132208	19	58545542	-7.69168386068559	1.813635654162355e-14
ENSG00000138468	SENP7	3	cg10635122	19	52391090	-11.355726972521923	1.937863738437719e-29
ENSG00000138468	SENP7	3	cg10705236	19	57901745	-7.842500546264751	5.613972343780395e-15
ENSG00000138468	SENP7	3	cg10710439	19	38183976	-11.02152820062209	7.493493290195478e-28
ENSG00000138468	SENP7	3	cg10783469	19	52391234	-9.513306128750921	3.0813032818068327e-21
ENSG00000138468	SENP7	3	cg10850725	19	44764380	-6.845387426925226	8.78121420925092e-12
ENSG00000138468	SENP7	3	cg11269599	19	52391304	-9.890515207508965	8.308164013340065e-23
ENSG00000138468	SENP7	3	cg11294513	19	58220295	-18.822443730390674	8.106335059673432e-76
ENSG00000138468	SENP7	3	cg11312896	19	58545122	-9.321598367253657	1.838152340227105e-20
ENSG00000138468	SENP7	3	cg11335411	19	58694111	-16.27145317434751	1.0492044849436438e-57
ENSG00000138468	SENP7	3	cg11546251	19	58322078	-7.390748598647565	1.7658424105567187e-13
ENSG00000138468	SENP7	3	cg11680826	19	37710094	-8.024550157520046	1.3248032224149144e-15
ENSG00000138468	SENP7	3	cg11788523	19	58446770	-17.86605109627985	9.147945797835094e-69
ENSG00000138468	SENP7	3	cg11909748	19	52956674	-7.588740397904636	3.9887022139046385e-14
ENSG00000138468	SENP7	3	cg11998703	19	58446669	-15.269530966773154	3.232359044526818e-51
ENSG00000138468	SENP7	3	cg12024906	19	37825679	-11.771515738311683	1.7841433279235175e-31
ENSG00000138468	SENP7	3	cg12227172	19	52391411	-8.913376653699451	7.357446528670328e-19
ENSG00000138468	SENP7	3	cg12259537	19	58514694	-8.252803808817227	2.0738654456831996e-16
ENSG00000138468	SENP7	3	cg12302428	19	52408520	-7.225198058315923	5.954918175598807e-13
ENSG00000138468	SENP7	3	cg12506930	19	58220718	-19.782236587673918	3.347483051023055e-83
ENSG00000138468	SENP7	3	cg12665460	19	52956657	-7.01715147932107	2.6446811946537373e-12
ENSG00000138468	SENP7	3	cg12717203	4	124342	-6.8434405347181135	8.900051269004791e-12
ENSG00000138468	SENP7	3	cg12948621	19	37825446	-11.019482117976933	7.660685019417167e-28
ENSG00000138468	SENP7	3	cg12961842	19	58446758	-11.987553186191468	1.4690790576912422e-32
ENSG00000138468	SENP7	3	cg13122377	19	57683687	-11.774666220924697	1.7208632335094491e-31
ENSG00000138468	SENP7	3	cg13208922	4	299022	-11.469497517734647	5.457026703844782e-30
ENSG00000138468	SENP7	3	cg13337047	19	57683843	-9.386443514137023	1.008491788120317e-20
ENSG00000138468	SENP7	3	cg13382661	19	58280767	-7.624002698044998	3.048417182114172e-14
ENSG00000138468	SENP7	3	cg13393830	19	52391605	-10.80543022835168	7.546036569942778e-27
ENSG00000138468	SENP7	3	cg13535626	4	206267	8.000788218387942	1.6024075727279833e-15
ENSG00000138468	SENP7	3	cg13540795	19	52551618	-7.302311579365312	3.3913023966906823e-13
ENSG00000138468	SENP7	3	cg13551269	19	19977733	-7.768714005859793	9.9906743056951185e-15
ENSG00000138468	SENP7	3	cg13636880	19	58280927	-7.211347958011734	6.584653740479606e-13
ENSG00000138468	SENP7	3	cg13668618	19	58446745	-10.6829966098371	2.7404924186370913e-26
ENSG00000138468	SENP7	3	cg13687570	19	37825320	-9.913726261099574	6.623459075020502e-23
ENSG00000138468	SENP7	3	cg13933427	19	44405818	-7.2367823479702205	5.473943730204083e-13
ENSG00000138468	SENP7	3	cg14025336	19	52900901	-8.81434387589777	1.7591678748431537e-18
ENSG00000138468	SENP7	3	cg14166009	19	37825309	-8.26615039438972	1.8579413158662579e-16
ENSG00000138468	SENP7	3	cg14186187	4	206282	7.573036457447688	4.494333516158588e-14
ENSG00000138468	SENP7	3	cg14239592	19	58715251	9.870967206216779	1.0051388892419707e-22
ENSG00000138468	SENP7	3	cg14256102	19	52511853	-8.394067349782844	6.422783220825534e-17
ENSG00000138468	SENP7	3	cg14283758	4	299370	-11.112284996887942	2.805102354803833e-28
ENSG00000138468	SENP7	3	cg14386312	19	58740861	-8.070781545916898	9.13571574021471e-16
ENSG00000138468	SENP7	3	cg14568105	19	37282931	-10.074565325521032	1.3588789566398125e-23
ENSG00000138468	SENP7	3	cg14582763	19	52956683	-8.02894147313715	1.2789610455134628e-15
ENSG00000138468	SENP7	3	cg14603375	19	57831549	-7.296681594697488	3.5342756457768e-13
ENSG00000138468	SENP7	3	cg14626309	4	299051	-12.972506269367486	9.88496409896256e-38
ENSG00000138468	SENP7	3	cg14713139	19	53811826	-6.791636700149916	1.2710386232334263e-11
ENSG00000138468	SENP7	3	cg14886059	19	58545001	-7.142147534652228	1.0851303287764325e-12
ENSG00000138468	SENP7	3	cg15060012	19	58446783	-16.946000228836784	2.823605136480302e-62
ENSG00000138468	SENP7	3	cg15117681	17	80202426	8.59127476094188	1.2120121733381743e-17
ENSG00000138468	SENP7	3	cg15415136	19	38042418	-8.249955221679308	2.1230599655335823e-16
ENSG00000138468	SENP7	3	cg15439725	4	299311	-6.984398584129086	3.3318870253408466e-12
ENSG00000138468	SENP7	3	cg15746696	19	58400494	-20.021193200949615	4.3602920166977577e-85
ENSG00000138468	SENP7	3	cg15759937	19	58400325	-11.868318407966528	5.858356760432711e-32
ENSG00000138468	SENP7	3	cg15800907	19	52328110	-9.367092792244005	1.2068373945306842e-20
ENSG00000138468	SENP7	3	cg16731240	19	52391250	-8.61277128453888	1.0083472035217732e-17
ENSG00000138468	SENP7	3	cg17114866	19	35222640	-7.018257362717978	2.624088583269157e-12
ENSG00000138468	SENP7	3	cg17271561	19	52839334	-7.592265157553516	3.8831453282126366e-14
ENSG00000138468	SENP7	3	cg17332326	19	37997471	-7.463591932837966	1.025896774678842e-13
ENSG00000138468	SENP7	3	cg17431052	19	37742481	-8.839928080043968	1.405674040749695e-18
ENSG00000138468	SENP7	3	cg17650272	19	52873019	-9.22078026052218	4.638298338619393e-20
ENSG00000138468	SENP7	3	cg17798563	19	58094517	9.60713313426661	1.2697888670752272e-21
ENSG00000138468	SENP7	3	cg17823234	19	38180021	-7.16332598021937	9.317392723663959e-13
ENSG00000138468	SENP7	3	cg18005867	4	206232	10.26937494634811	1.932757698520411e-24
ENSG00000138468	SENP7	3	cg18673377	19	58446898	-20.222446120460933	1.0901445936130617e-86
ENSG00000138468	SENP7	3	cg18860954	19	58400574	-19.42993508115579	1.863341501448346e-80
ENSG00000138468	SENP7	3	cg19311218	19	44952417	-7.627053875819274	2.978157879608025e-14
ENSG00000138468	SENP7	3	cg19355079	19	23253218	-7.275282483867425	4.13377787542822e-13
ENSG00000138468	SENP7	3	cg19375479	19	44952604	-7.047659174296774	2.1307709959280314e-12
ENSG00000138468	SENP7	3	cg19416570	19	58715677	9.756182135349738	3.0540604692470935e-22
ENSG00000138468	SENP7	3	cg19866478	19	52801051	-6.941088823145518	4.5150713992129385e-12
ENSG00000138468	SENP7	3	cg19904905	19	49469667	7.629328842339529	2.9268115201241594e-14
ENSG00000138468	SENP7	3	cg19915738	19	44952730	-8.43314387017162	4.628868280121162e-17
ENSG00000138468	SENP7	3	cg20320494	4	124232	-6.969411473545963	3.702085754533352e-12
ENSG00000138468	SENP7	3	cg20404336	12	133757909	-8.18334759884703	3.665185850096936e-16
ENSG00000138468	SENP7	3	cg20440041	19	37096816	-11.283672069697456	4.298039218633059e-29
ENSG00000138468	SENP7	3	cg21020710	19	58739803	-6.804098709399731	1.166886812449005e-11
ENSG00000138468	SENP7	3	cg21444693	19	58446787	-18.49344282707541	2.3426165462272056e-73
ENSG00000138468	SENP7	3	cg21489303	19	57989182	-13.043620959730717	4.047306907689213e-38
ENSG00000138468	SENP7	3	cg21493505	19	56879418	-6.846153892279322	8.73485754464484e-12
ENSG00000138468	SENP7	3	cg21553182	19	52956821	-8.260346890918965	1.9489623160372578e-16
ENSG00000138468	SENP7	3	cg21759268	19	58446988	-9.758422058292515	2.9888875066684124e-22
ENSG00000138468	SENP7	3	cg21790626	19	58220494	-12.709697123209814	2.578801651174368e-36
ENSG00000138468	SENP7	3	cg21808240	19	36822564	-9.810748483822778	1.8034025430288403e-22
ENSG00000138468	SENP7	3	cg21907914	19	53757677	-6.870573270901247	7.377208059284339e-12
ENSG00000138468	SENP7	3	cg22001557	19	58239424	-10.454790807098307	2.9241519220858556e-25
ENSG00000138468	SENP7	3	cg22022580	19	37266605	-7.235762674720358	5.514701206435449e-13
ENSG00000138468	SENP7	3	cg22331349	19	52391350	-10.955780929031102	1.5198551823483879e-27
ENSG00000138468	SENP7	3	cg22457238	19	58570995	-9.420866562795878	7.321293895310102e-21
ENSG00000138468	SENP7	3	cg22472290	19	52391480	-11.707874363315625	3.693307942731702e-31
ENSG00000138468	SENP7	3	cg22510337	19	58399967	-17.86104524963121	9.940793002380063e-69
ENSG00000138468	SENP7	3	cg22517995	19	37096588	-7.616852505298519	3.219515805382762e-14
ENSG00000138468	SENP7	3	cg22561329	19	57346735	-8.240371549629662	2.297168606396812e-16
ENSG00000138468	SENP7	3	cg22634378	19	37742834	-6.824976556403302	1.0108366936083352e-11
ENSG00000138468	SENP7	3	cg22682154	19	57683164	-6.854577312377989	8.240941131296691e-12
ENSG00000138468	SENP7	3	cg22685966	19	38183418	-8.031858162752574	1.2493805343881913e-15
ENSG00000138468	SENP7	3	cg22720041	19	44952725	-8.628213103285724	8.832859050564698e-18
ENSG00000138468	SENP7	3	cg22720790	19	58716032	8.800321151054318	1.9888057372840603e-18
ENSG00000138468	SENP7	3	cg22797884	19	37800967	-7.529945755316065	6.228386176435902e-14
ENSG00000138468	SENP7	3	cg23010048	19	52391257	-9.937799171869958	5.233386600137793e-23
ENSG00000138468	SENP7	3	cg23029635	19	57904254	7.17168359420237	8.772518508175127e-13
ENSG00000138468	SENP7	3	cg23054584	19	36822311	-8.74850866214773	3.1245304274382843e-18
ENSG00000138468	SENP7	3	cg23372544	19	23387068	7.239211445752689	5.378038109061504e-13
ENSG00000138468	SENP7	3	cg23397578	19	37742925	-7.184869644301261	7.975844438036364e-13
ENSG00000138468	SENP7	3	cg23405218	19	38183456	-8.974078926528945	4.2925549396331353e-19
ENSG00000138468	SENP7	3	cg23448505	19	37826008	-10.75777194742494	1.2486764883252721e-26
ENSG00000138468	SENP7	3	cg23891996	19	9517858	-7.023891894953958	2.5215862861031063e-12
ENSG00000138468	SENP7	3	cg24027100	19	36822549	-14.55781173570158	7.896768497882588e-47
ENSG00000138468	SENP7	3	cg24124798	19	58400275	-9.09640909216587	1.4341796992019988e-19
ENSG00000138468	SENP7	3	cg24189904	19	9473781	-7.685580641088097	1.9009197305147865e-14
ENSG00000138468	SENP7	3	cg24192482	19	58111769	-7.264026051815566	4.4881352738599404e-13
ENSG00000138468	SENP7	3	cg24214260	19	58193221	-15.949980752913966	1.3869760750566804e-55
ENSG00000138468	SENP7	3	cg24368848	19	58545160	-6.963930179667955	3.847317472651938e-12
ENSG00000138468	SENP7	3	cg24413918	19	58516100	-10.311725525759257	1.2590563160950955e-24
ENSG00000138468	SENP7	3	cg24794228	19	52391166	-11.314360621810462	3.0632207865425564e-29
ENSG00000138468	SENP7	3	cg24834889	19	37825406	-12.332154064806296	2.511569017955178e-34
ENSG00000138468	SENP7	3	cg24871714	19	37095466	-7.033323880595251	2.358725143948977e-12
ENSG00000138468	SENP7	3	cg25361961	19	58070048	-17.0975830264079	2.522495885126306e-63
ENSG00000138468	SENP7	3	cg25400396	19	58400559	-22.17642711597791	6.607140774700358e-103
ENSG00000138468	SENP7	3	cg25404914	19	20607771	-8.181830164834345	3.710883045880886e-16
ENSG00000138468	SENP7	3	cg25465322	19	44860658	-6.78706853711775	1.3114550122554626e-11
ENSG00000138468	SENP7	3	cg25537993	19	58545182	-10.008034737455763	2.6241104290642383e-23
ENSG00000138468	SENP7	3	cg25772438	19	37329517	-7.605201980075932	3.518753762765015e-14
ENSG00000138468	SENP7	3	cg26263766	19	58739734	-10.339097287029968	9.535996762081037e-25
ENSG00000138468	SENP7	3	cg26356061	19	58446960	-15.960737197060508	1.1794799765563404e-55
ENSG00000138468	SENP7	3	cg26465391	19	58220773	-16.56299276326429	1.1624667046004703e-59
ENSG00000138468	SENP7	3	cg26662727	19	57947642	-8.034892753010793	1.2193199300499797e-15
ENSG00000138468	SENP7	3	cg26671652	19	58446312	-8.115734989801114	6.352726890477807e-16
ENSG00000138468	SENP7	3	cg26698460	19	58716004	8.041952774079139	1.1521139768985452e-15
ENSG00000138468	SENP7	3	cg26713179	19	52772371	-8.727519263895925	3.749328985834282e-18
ENSG00000138468	SENP7	3	cg26734888	19	37825307	-8.970092974774001	4.447619657287428e-19
ENSG00000138468	SENP7	3	cg27046034	19	58280801	-8.616871597334677	9.735293320402668e-18
ENSG00000138468	SENP7	3	cg27049766	19	58220516	-19.142145850439146	3.0403898812383505e-78
ENSG00000138468	SENP7	3	cg27112264	19	58400504	-17.2855066488025	1.2309960215577673e-64
ENSG00000138468	SENP7	3	cg27199827	20	18567975	7.054913531280998	2.0237988603124482e-12
ENSG00000138468	SENP7	3	cg27324426	19	58220837	-18.156151629896407	7.158009134269904e-71
ENSG00000138468	SENP7	3	cg27353143	19	38308057	-8.619136325721131	9.54810022926641e-18
ENSG00000138468	SENP7	3	cg27371091	19	58145084	-7.287775542283736	3.7726233923818903e-13
ENSG00000138468	SENP7	3	cg27389185	19	38042123	-8.011468829294584	1.4711751600125755e-15
ENSG00000138468	SENP7	3	cg27391267	19	58545333	-7.476262427996879	9.329490317447158e-14
ENSG00000114544	SLC41A3	3	cg01886893	5	102089360	-13.53370917780402	7.62031735511308e-41
ENSG00000114544	SLC41A3	3	cg15753593	2	159726728	7.335547280313186	2.6557820235617267e-13
ENSG00000163959	SLC51A	3	cg27137576	6	31922361	-12.662982662373922	4.5946404602740556e-36
ENSG00000181804	SLC9A9	3	cg16899991	3	127868625	-10.536481040166889	1.2589104017920574e-25
ENSG00000114520	SNX4	3	cg02560186	11	3602584	-13.385137794056726	5.219275918226155e-40
ENSG00000114520	SNX4	3	cg15753593	2	159726728	17.007216553384563	1.0644322026734523e-62
ENSG00000144455	SUMF1	3	cg05386570	7	99177695	-7.660155317852381	2.3112195634352016e-14
ENSG00000072274	TFRC	3	cg03360716	7	86596636	-11.614817276695451	1.0663970141730532e-30
ENSG00000072274	TFRC	3	cg27137576	6	31922361	-7.357392752361485	2.2617482592266473e-13
ENSG00000144560	VGLL4	3	cg17076431	6	49901607	16.387685062702314	1.7501399499936284e-58
ENSG00000177311	ZBTB38	3	cg00685614	16	89118838	7.902967194487252	3.4869865189193443e-15
ENSG00000177311	ZBTB38	3	cg00926657	17	79880822	7.716337499679705	1.4993768689020998e-14
ENSG00000177311	ZBTB38	3	cg00994936	19	1423902	7.934703271217428	2.7121673966718417e-15
ENSG00000177311	ZBTB38	3	cg01561259	17	78560781	7.840499137117072	5.702481975864491e-15
ENSG00000177311	ZBTB38	3	cg02470690	6	27839548	9.823678990081785	1.5908955386565767e-22
ENSG00000177311	ZBTB38	3	cg03569283	8	142222314	7.362703167021534	2.173483472004497e-13
ENSG00000177311	ZBTB38	3	cg03711457	11	113746831	8.227089471651142	2.561773180058846e-16
ENSG00000177311	ZBTB38	3	cg04486919	7	2117171	8.655979550907404	6.956840040637692e-18
ENSG00000177311	ZBTB38	3	cg04519550	16	89349466	7.005767846320345	2.8659793633746113e-12
ENSG00000177311	ZBTB38	3	cg04890576	17	73032613	6.796681092920032	1.2277847403980986e-11
ENSG00000177311	ZBTB38	3	cg05350293	16	89119002	7.78141437272147	9.049858803926049e-15
ENSG00000177311	ZBTB38	3	cg06008435	6	25027714	10.258191698932238	2.1633971501964624e-24
ENSG00000177311	ZBTB38	3	cg07173823	1	45190519	7.103595406378423	1.4304616352784252e-12
ENSG00000177311	ZBTB38	3	cg07675998	11	64268315	11.749780510368055	2.2877093982304647e-31
ENSG00000177311	ZBTB38	3	cg07721547	22	42475119	7.397826061984301	1.675374337489261e-13
ENSG00000177311	ZBTB38	3	cg08040471	17	80407779	6.942238642402657	4.478730288752109e-12
ENSG00000177311	ZBTB38	3	cg08362283	16	89119663	7.204115269965846	6.93875516769333e-13
ENSG00000177311	ZBTB38	3	cg09658497	7	2847517	6.919624700782321	5.245286288889602e-12
ENSG00000177311	ZBTB38	3	cg09697999	7	733198	7.89977174519861	3.5761520649149466e-15
ENSG00000177311	ZBTB38	3	cg09780964	16	89119135	7.222967143136689	6.051940473304405e-13
ENSG00000177311	ZBTB38	3	cg09929238	17	78560916	6.879896965799663	6.915133658859719e-12
ENSG00000177311	ZBTB38	3	cg10975863	14	68830704	9.318275679307792	1.8951545672300926e-20
ENSG00000177311	ZBTB38	3	cg11382082	5	43038611	7.280140214493336	3.9893067390710507e-13
ENSG00000177311	ZBTB38	3	cg12144681	8	142220329	9.009359756267953	3.1331265555869836e-19
ENSG00000177311	ZBTB38	3	cg13803234	14	68830813	7.685948214383281	1.8954446639115083e-14
ENSG00000177311	ZBTB38	3	cg14004921	9	140023416	8.093226169820376	7.621457616630397e-16
ENSG00000177311	ZBTB38	3	cg14185922	9	130615188	7.518428678725614	6.793612087451395e-14
ENSG00000177311	ZBTB38	3	cg14398883	7	101398184	9.470904400386011	4.586801077532219e-21
ENSG00000177311	ZBTB38	3	cg14823389	7	101398152	9.316828636310348	1.9206191531681187e-20
ENSG00000177311	ZBTB38	3	cg16337457	17	76989680	7.957333372237247	2.2659235781584564e-15
ENSG00000177311	ZBTB38	3	cg16815625	8	141229477	8.110732343981217	6.615010588913825e-16
ENSG00000177311	ZBTB38	3	cg18034295	22	42475135	8.016130332551798	1.4171833735906026e-15
ENSG00000177311	ZBTB38	3	cg18094999	11	113746795	9.576405642164108	1.6988290555582397e-21
ENSG00000177311	ZBTB38	3	cg18446336	7	2847575	7.92951061177206	2.8261882833642336e-15
ENSG00000177311	ZBTB38	3	cg18576206	22	44392384	7.890279736613462	3.854471038863511e-15
ENSG00000177311	ZBTB38	3	cg19338056	9	14992172	11.56090860157682	1.9542164908294625e-30
ENSG00000177311	ZBTB38	3	cg19717773	7	2847554	7.611000512248788	3.3663746294921184e-14
ENSG00000177311	ZBTB38	3	cg21771528	5	18745861	14.576043145251122	6.124718273185469e-47
ENSG00000177311	ZBTB38	3	cg21806580	5	18746010	16.882672546026903	7.694165771578233e-62
ENSG00000177311	ZBTB38	3	cg22114489	7	101398177	9.77522290606803	2.541667312385555e-22
ENSG00000177311	ZBTB38	3	cg22488164	12	14716910	7.856582752890224	5.0259391249326044e-15
ENSG00000177311	ZBTB38	3	cg24994319	6	25027586	9.07695370667846	1.7087681008695877e-19
ENSG00000177311	ZBTB38	3	cg25355213	17	73780246	6.837173561209009	9.293066135024115e-12
ENSG00000177311	ZBTB38	3	cg26066277	17	79792777	8.77433126413425	2.4951776635509757e-18
ENSG00000177311	ZBTB38	3	cg26332052	17	73780035	7.290549823359196	3.6965678309968427e-13
ENSG00000177311	ZBTB38	3	cg26547058	8	142243143	6.90123689205834	5.962190205720809e-12
ENSG00000177311	ZBTB38	3	cg26824091	6	38670437	8.725181643721523	3.8257876459306624e-18
ENSG00000177311	ZBTB38	3	cg27381584	17	80407749	7.87887819698828	4.217090311991633e-15
ENSG00000177311	ZBTB38	3	cg27478579	2	55497012	9.344692717810185	1.4848212771798784e-20
ENSG00000172667	ZMAT3	3	cg03818034	7	99746088	-7.221973781031587	6.09549539124317e-13
ENSG00000186448	ZNF197	3	cg00981877	20	50366841	7.2436082270285675	5.209751696229573e-13
ENSG00000186448	ZNF197	3	cg26675329	2	103033753	7.346418442769569	2.451980759749644e-13
ENSG00000169981	ZNF35	3	cg17586885	6	166259959	9.09930450725743	1.397945264122838e-19
ENSG00000169981	ZNF35	3	cg20418529	6	166260012	9.189669968939603	6.163273406878467e-20
ENSG00000177873	ZNF619	3	cg01882498	4	83934956	7.1820890637112305	8.135321378259879e-13
ENSG00000227124	ZNF717	3	cg03844506	4	4109441	8.824948705737146	1.601742929045743e-18
ENSG00000070476	ZXDC	3	cg21035471	17	77005669	-8.849682804378428	1.289872354938153e-18
ENSG00000196526	AFAP1	4	cg05984533	17	79479583	-10.305397828146152	1.3422292044982306e-24
ENSG00000196526	AFAP1	4	cg10052190	16	22019676	-12.119383844714207	3.135470835686594e-33
ENSG00000145354	CISD2	4	cg16471864	4	38666270	-8.483697768890417	3.02312442976114e-17
ENSG00000145476	CYP4V2	4	cg07700062	1	236767390	-39.71080457097985	2.122949506886674e-291
ENSG00000109381	ELF2	4	cg00691240	1	52498502	9.620326152067099	1.1198060554348893e-21
ENSG00000109381	ELF2	4	cg07977202	11	66311348	-6.85708092996298	8.098642711739058e-12
ENSG00000109381	ELF2	4	cg08855861	1	52498679	8.75516431649014	2.9479866442002256e-18
ENSG00000109381	ELF2	4	cg15758008	5	4866318	8.276984226206208	1.6987325928750583e-16
ENSG00000109381	ELF2	4	cg19603903	19	57742345	6.998118645490337	3.024630110383939e-12
ENSG00000109381	ELF2	4	cg19841649	5	4866322	8.426771795428676	4.882155029475542e-17
ENSG00000109381	ELF2	4	cg22711741	19	57742444	7.869689337442871	4.53307123441306e-15
ENSG00000109381	ELF2	4	cg25592564	5	4866442	7.531675898879282	6.14659765492043e-14
ENSG00000171503	ETFDH	4	cg16792258	2	239631449	8.594628346919288	1.1774575331115481e-17
ENSG00000163322	FAM175A	4	cg13633941	7	26284736	-7.3436182390183244	2.502590559904654e-13
ENSG00000109536	FRG1	4	cg03435771	12	38595601	8.687502359440272	5.29729486900603e-18
ENSG00000109536	FRG1	4	cg05369274	7	55639575	9.220049861508313	4.664701725015625e-20
ENSG00000109536	FRG1	4	cg07070341	4	121844174	11.993545157204771	1.3661810876352294e-32
ENSG00000109536	FRG1	4	cg12894917	11	9286517	-7.183931602226207	8.027071015591218e-13
ENSG00000109536	FRG1	4	cg20027314	12	108258022	-6.853862871546039	8.27915425326692e-12
ENSG00000109536	FRG1	4	cg25456927	18	12308339	-10.448580270932302	3.111639765952515e-25
ENSG00000198189	HSD17B11	4	cg00130528	2	175189039	10.463670361953081	2.669188645116264e-25
ENSG00000127415	IDUA	4	cg15457005	11	11643754	-11.92029764119354	3.226053383100514e-32
ENSG00000127415	IDUA	4	cg17687970	8	22462467	-7.329571536655796	2.777564189079422e-13
ENSG00000127415	IDUA	4	cg20822818	11	119235062	-8.773817533994468	2.5102863109698435e-18
ENSG00000169429	IL8	4	cg23097035	7	28396164	-8.856126758782557	1.2188243752570295e-18
ENSG00000164344	KLKB1	4	cg07700062	1	236767390	16.12093242563002	1.0378652617296406e-56
ENSG00000164024	METAP1	4	cg12403253	6	26598502	15.068812967089395	5.8270543940003205e-50
ENSG00000145388	METTL14	4	cg24350395	1	243288625	-13.33138326922294	1.0411051971128411e-39
ENSG00000145388	METTL14	4	cg26518628	1	97050305	22.072184815477183	5.122316772474734e-102
ENSG00000215375	MYL5	4	cg11105585	21	45759228	8.404781997135325	5.877390647021907e-17
ENSG00000215375	MYL5	4	cg19759883	12	14956454	7.862836776005047	4.788494134282741e-15
ENSG00000215375	MYL5	4	cg27438889	10	123922704	8.917645675256175	7.092949997933837e-19
ENSG00000109320	NFKB1	4	cg00331027	5	80521615	-8.860800203667045	1.1698406038497697e-18
ENSG00000109320	NFKB1	4	cg00499237	2	97169033	-23.800372334596045	2.8714412870972463e-117
ENSG00000109320	NFKB1	4	cg00580497	5	1153746	-9.302037640211005	2.200865413207283e-20
ENSG00000109320	NFKB1	4	cg00730373	16	89050488	-11.202365359368256	1.0495145377844132e-28
ENSG00000109320	NFKB1	4	cg01020263	16	50732073	-9.295311193899837	2.3414644678609037e-20
ENSG00000109320	NFKB1	4	cg01037823	16	2879998	-7.731787367003081	1.3304137762799856e-14
ENSG00000109320	NFKB1	4	cg01127300	22	38614796	-11.073463656978928	4.272532913123434e-28
ENSG00000109320	NFKB1	4	cg01156844	15	85520317	-9.128540012923418	1.0726430620954405e-19
ENSG00000109320	NFKB1	4	cg01243823	16	50732212	-7.730970435152348	1.3388547370610357e-14
ENSG00000109320	NFKB1	4	cg01426713	6	106517533	-7.236648834312506	5.478791536509001e-13
ENSG00000109320	NFKB1	4	cg01476795	10	82362879	-8.260739239164078	1.9423922958161603e-16
ENSG00000109320	NFKB1	4	cg02086820	16	88698611	-6.967665622875034	3.747471478828281e-12
ENSG00000109320	NFKB1	4	cg02097120	1	154492952	-7.6958876259138655	1.755630453625942e-14
ENSG00000109320	NFKB1	4	cg02222791	14	88621424	-7.979144443919251	1.9044715903869628e-15
ENSG00000109320	NFKB1	4	cg02240252	17	47931591	-11.003596931641548	9.087027214412996e-28
ENSG00000109320	NFKB1	4	cg02371935	16	87521363	7.003983920740752	2.9021743125061005e-12
ENSG00000109320	NFKB1	4	cg02387843	4	9892887	-9.224207503737018	4.494326229400799e-20
ENSG00000109320	NFKB1	4	cg02539664	3	9025584	-8.015163694574307	1.428105998318428e-15
ENSG00000109320	NFKB1	4	cg02558476	16	2880326	-7.222671062177199	6.064708382684635e-13
ENSG00000109320	NFKB1	4	cg02867514	17	34207341	-7.566219516914847	4.7324924259548034e-14
ENSG00000109320	NFKB1	4	cg03052004	6	11702389	-12.379983741215597	1.4149868512876678e-34
ENSG00000109320	NFKB1	4	cg03055671	3	172231528	-9.83253763826778	1.4597519032792337e-22
ENSG00000109320	NFKB1	4	cg03078551	17	41656298	-7.950240113315252	2.3972409375165705e-15
ENSG00000109320	NFKB1	4	cg03113867	11	129920411	-11.083612309330773	3.8275392119005874e-28
ENSG00000109320	NFKB1	4	cg03155159	16	59627519	-8.307082764073778	1.3245759705429233e-16
ENSG00000109320	NFKB1	4	cg03292675	8	21912864	-11.155361029979211	1.7541706105942667e-28
ENSG00000109320	NFKB1	4	cg03502889	11	34255733	-12.5508343742206	1.7968016983568905e-35
ENSG00000109320	NFKB1	4	cg03796224	8	30383628	-6.827224517098823	9.952389782606486e-12
ENSG00000109320	NFKB1	4	cg03889450	4	10082415	-14.458220232513293	3.133648533456251e-46
ENSG00000109320	NFKB1	4	cg03929796	3	52231840	-18.204792932196888	3.1438233524128862e-71
ENSG00000109320	NFKB1	4	cg03957124	6	37016869	-7.184335438729155	8.006022446039812e-13
ENSG00000109320	NFKB1	4	cg04011474	2	28904455	-7.58636882905803	4.060887047635068e-14
ENSG00000109320	NFKB1	4	cg04091113	16	85576555	-9.756090776846067	3.0559045959101603e-22
ENSG00000109320	NFKB1	4	cg04163119	6	41754006	-8.839445959810492	1.4113715140036877e-18
ENSG00000109320	NFKB1	4	cg04211179	1	16301562	-8.476395617110262	3.215399896770485e-17
ENSG00000109320	NFKB1	4	cg04333296	17	58180418	-7.6191612998623945	3.162927106470019e-14
ENSG00000109320	NFKB1	4	cg05055712	16	2880431	-9.747578417438998	3.3168278514854945e-22
ENSG00000109320	NFKB1	4	cg05146922	2	10634174	-10.536862891930076	1.2544139878957933e-25
ENSG00000109320	NFKB1	4	cg05376738	1	212923780	-10.161053018997446	5.739442749336706e-24
ENSG00000109320	NFKB1	4	cg05405914	16	8972233	-16.857570889909603	1.1429916609303337e-61
ENSG00000109320	NFKB1	4	cg05436939	4	1202599	-7.320653848488816	2.9635298530045016e-13
ENSG00000109320	NFKB1	4	cg05503062	15	90324339	-15.129994106144286	2.41964671121541e-50
ENSG00000109320	NFKB1	4	cg05627365	15	81453408	-7.739880771424894	1.2495682334341024e-14
ENSG00000109320	NFKB1	4	cg05839709	11	109962727	9.515074144466233	3.0297277877531428e-21
ENSG00000109320	NFKB1	4	cg06169746	3	119419493	-10.51818623578235	1.5215388506474783e-25
ENSG00000109320	NFKB1	4	cg06178669	11	63334608	-13.138670904721126	1.2174380149834485e-38
ENSG00000109320	NFKB1	4	cg06514003	17	40330907	-6.887262364603364	6.570231714121818e-12
ENSG00000109320	NFKB1	4	cg06619077	1	47656003	-8.840489888122109	1.3984942742939351e-18
ENSG00000109320	NFKB1	4	cg06764092	1	159796658	-6.955893170877586	4.0701192458350806e-12
ENSG00000109320	NFKB1	4	cg06792126	15	90365488	-9.74492830604263	3.4024749451181207e-22
ENSG00000109320	NFKB1	4	cg06865845	17	72608711	-8.986675401810325	3.8360306312028254e-19
ENSG00000109320	NFKB1	4	cg06891043	17	7186718	-8.454129577361542	3.879331807070268e-17
ENSG00000109320	NFKB1	4	cg07026433	7	129781152	-10.032837485626366	2.0535602502866398e-23
ENSG00000109320	NFKB1	4	cg07037944	15	64290807	-17.088392695181106	2.9148192170298806e-63
ENSG00000109320	NFKB1	4	cg07072405	12	105839243	-8.91447179102287	7.285076942899884e-19
ENSG00000109320	NFKB1	4	cg07136133	11	36422377	-6.915745338479785	5.388935759182119e-12
ENSG00000109320	NFKB1	4	cg07285708	3	10291324	-10.872865556703548	3.6855772252329985e-27
ENSG00000109320	NFKB1	4	cg07352859	16	89050672	-7.5802255956268665	4.255043013697108e-14
ENSG00000109320	NFKB1	4	cg08036172	3	127473609	-7.94893587394019	2.422217165000859e-15
ENSG00000109320	NFKB1	4	cg08289056	10	6233666	-8.792893959363981	2.121792164327118e-18
ENSG00000109320	NFKB1	4	cg08548559	22	31686097	-12.484499853227694	4.016164722640713e-35
ENSG00000109320	NFKB1	4	cg08575688	2	228678500	-9.854292014336355	1.1818024500335781e-22
ENSG00000109320	NFKB1	4	cg08656816	17	34207454	-6.917596373789074	5.3198269099085706e-12
ENSG00000109320	NFKB1	4	cg09043456	17	79024087	-8.28320455198177	1.6138027336607956e-16
ENSG00000109320	NFKB1	4	cg09275408	10	44500491	-15.328529428493292	1.370189579951473e-51
ENSG00000109320	NFKB1	4	cg09316140	8	21912474	-7.417645407358409	1.4457020922281392e-13
ENSG00000109320	NFKB1	4	cg09701700	10	104194843	-7.295568719593285	3.562913248698188e-13
ENSG00000109320	NFKB1	4	cg09865015	4	1202509	-10.004190182267708	2.7246537947366186e-23
ENSG00000109320	NFKB1	4	cg10005565	2	235578952	-9.821769295482659	1.6203809407653518e-22
ENSG00000109320	NFKB1	4	cg10045881	1	111770291	-8.026438855546811	1.304723166961607e-15
ENSG00000109320	NFKB1	4	cg10315334	17	34207332	-8.414111468109361	5.4295990846677695e-17
ENSG00000109320	NFKB1	4	cg10521450	10	105439280	-10.714187358686061	1.9748155727377893e-26
ENSG00000109320	NFKB1	4	cg10691866	7	65817282	-7.332732656010556	2.711428994674402e-13
ENSG00000109320	NFKB1	4	cg10929758	2	54857270	-7.358578975374518	2.2406658706148e-13
ENSG00000109320	NFKB1	4	cg11012543	3	52231691	-19.791963084529023	2.795905030547425e-83
ENSG00000109320	NFKB1	4	cg11152384	11	68934300	-17.470950821638215	6.065101077929131e-66
ENSG00000109320	NFKB1	4	cg11715092	21	47705294	7.775249224791112	9.49432353352079e-15
ENSG00000109320	NFKB1	4	cg11739399	1	206669785	-8.92367144036355	6.715219566084515e-19
ENSG00000109320	NFKB1	4	cg11823034	2	218858970	-7.480892017043605	9.010075519568486e-14
ENSG00000109320	NFKB1	4	cg11827101	2	8468422	-14.878727866168461	8.735607007663793e-49
ENSG00000109320	NFKB1	4	cg11998932	7	3901843	-8.532152399871793	2.0054477662226378e-17
ENSG00000109320	NFKB1	4	cg12226095	4	27057954	-11.827431781816115	9.380968003486899e-32
ENSG00000109320	NFKB1	4	cg12352038	20	62114621	-7.615773881414769	3.245792410818588e-14
ENSG00000109320	NFKB1	4	cg12428160	10	44500693	-15.218932514459008	6.713010099593286e-51
ENSG00000109320	NFKB1	4	cg12547807	1	9473751	-7.580382204739128	4.249981816597727e-14
ENSG00000109320	NFKB1	4	cg14069673	2	62385108	-9.060614656115735	1.979027304391097e-19
ENSG00000109320	NFKB1	4	cg14093127	2	8714417	-7.5470862970504005	5.470830367766295e-14
ENSG00000109320	NFKB1	4	cg14437551	6	31539986	-7.157340552395712	9.727092644294717e-13
ENSG00000109320	NFKB1	4	cg14622819	4	76944817	-7.113630977529195	1.3313029556166398e-12
ENSG00000109320	NFKB1	4	cg15797834	19	4338932	-7.285813003947658	3.8268931906126676e-13
ENSG00000109320	NFKB1	4	cg15946653	11	113258444	-7.330693674357706	2.7524550327688275e-13
ENSG00000109320	NFKB1	4	cg15947301	17	3462082	-15.287298748745933	2.4941619228449424e-51
ENSG00000109320	NFKB1	4	cg15958828	3	71598380	-7.356865071143577	2.26922498185988e-13
ENSG00000109320	NFKB1	4	cg16288101	14	88621538	-6.798522855131736	1.2123284557708162e-11
ENSG00000109320	NFKB1	4	cg16551670	5	106637856	-10.663807253257309	3.3489576153699323e-26
ENSG00000109320	NFKB1	4	cg16914953	7	100798809	-8.181819453451048	3.710691822044026e-16
ENSG00000109320	NFKB1	4	cg16949914	10	6104515	-9.917107918872821	6.406194225127918e-23
ENSG00000109320	NFKB1	4	cg16983541	3	52231347	-14.232263433697087	6.947676102435197e-45
ENSG00000109320	NFKB1	4	cg17215278	1	117114263	-7.5397916592372685	5.781211883544914e-14
ENSG00000109320	NFKB1	4	cg17341765	12	65997206	-7.2936438742791045	3.6135401242762545e-13
ENSG00000109320	NFKB1	4	cg17467525	1	9686523	-6.89203685123835	6.355871230690401e-12
ENSG00000109320	NFKB1	4	cg17578639	3	176862949	-8.968568519296399	4.507481353681616e-19
ENSG00000109320	NFKB1	4	cg18372930	5	137939469	-10.444452710527713	3.2503704666795304e-25
ENSG00000109320	NFKB1	4	cg18643093	5	150521257	-7.191359728465483	7.609619679523082e-13
ENSG00000109320	NFKB1	4	cg18728264	11	118766491	-8.081929529556131	8.348980390045132e-16
ENSG00000109320	NFKB1	4	cg18764008	5	151101114	-7.09441962605225	1.5273306430339622e-12
ENSG00000109320	NFKB1	4	cg19131667	3	17236940	-12.579429840546606	1.2688144174258364e-35
ENSG00000109320	NFKB1	4	cg19199805	4	27058111	-7.956448394466281	2.281787489500019e-15
ENSG00000109320	NFKB1	4	cg19268652	6	12119552	-8.198759672332615	3.2309207404519166e-16
ENSG00000109320	NFKB1	4	cg19313311	7	74058031	-10.24964276348956	2.3578284431679964e-24
ENSG00000109320	NFKB1	4	cg19616339	2	69164114	-7.565278229060851	4.766405729168414e-14
ENSG00000109320	NFKB1	4	cg19661705	15	31307115	-7.7333451057085645	1.3144633329018712e-14
ENSG00000109320	NFKB1	4	cg19893929	2	16105823	-10.249789303075232	2.354347295312726e-24
ENSG00000109320	NFKB1	4	cg19920134	7	38227870	-9.949399959443243	4.66950869724969e-23
ENSG00000109320	NFKB1	4	cg20607293	1	147112703	-9.981123443985734	3.419437819750336e-23
ENSG00000109320	NFKB1	4	cg20774552	11	46415316	-15.70932874028197	5.070124181838356e-54
ENSG00000109320	NFKB1	4	cg21141329	17	48290459	-13.4035654855145	4.115444910892893e-40
ENSG00000109320	NFKB1	4	cg21216471	17	4644276	-7.277033346942947	4.080829149043851e-13
ENSG00000109320	NFKB1	4	cg21529807	19	42134478	-16.336365589033427	3.8653817538304294e-58
ENSG00000109320	NFKB1	4	cg21695395	11	128364143	-8.073448686880932	8.94019182874914e-16
ENSG00000109320	NFKB1	4	cg22242842	2	85167149	-10.943024404441438	1.7418298798034726e-27
ENSG00000109320	NFKB1	4	cg22322277	6	75459158	-20.015295013374335	4.834709771120944e-85
ENSG00000109320	NFKB1	4	cg22514722	3	127473755	-7.977993496913837	1.9220311920218576e-15
ENSG00000109320	NFKB1	4	cg22579075	7	94250352	-7.072189544960227	1.7896745820549974e-12
ENSG00000109320	NFKB1	4	cg22870429	3	114027859	-14.188145371381525	1.2658807000170496e-44
ENSG00000109320	NFKB1	4	cg23045716	4	1201881	-9.31874150934228	1.8868105701446392e-20
ENSG00000109320	NFKB1	4	cg23681974	3	126734092	-6.899746725526803	6.024112222212189e-12
ENSG00000109320	NFKB1	4	cg23786580	7	43204506	-13.03835577211762	4.3209047790537287e-38
ENSG00000109320	NFKB1	4	cg23813257	16	3115286	-9.61212671421964	1.2106792547883684e-21
ENSG00000109320	NFKB1	4	cg24088496	11	96071506	-8.375347169332521	7.509024534385141e-17
ENSG00000109320	NFKB1	4	cg24163658	3	58182370	-12.01233248736886	1.0996150133283222e-32
ENSG00000109320	NFKB1	4	cg24174557	17	57903544	-7.828977294568134	6.241143618745709e-15
ENSG00000109320	NFKB1	4	cg24587080	6	160016373	-9.907463581151402	7.039372755335139e-23
ENSG00000109320	NFKB1	4	cg24957609	12	27125095	-16.924466480242167	3.964250161948595e-62
ENSG00000109320	NFKB1	4	cg25073708	9	132083538	-7.939817652553707	2.6041374370097113e-15
ENSG00000109320	NFKB1	4	cg25123427	3	39054994	-17.880014889719845	7.233405403065323e-69
ENSG00000109320	NFKB1	4	cg25141611	13	113422162	-7.292174454380631	3.6526635593166616e-13
ENSG00000109320	NFKB1	4	cg25762679	1	101185311	-9.393316208919309	9.458847850102382e-21
ENSG00000109320	NFKB1	4	cg25897251	12	53509460	-8.618260317100312	9.618444914168612e-18
ENSG00000109320	NFKB1	4	cg26259865	16	2880359	-7.213891810947372	6.463732283421772e-13
ENSG00000109320	NFKB1	4	cg26543539	1	156907349	-7.9031188111026225	3.482599290073958e-15
ENSG00000109320	NFKB1	4	cg26708797	5	170906387	-7.572018571175696	4.528734905109941e-14
ENSG00000109320	NFKB1	4	cg27250032	10	5544140	-8.933666878594549	6.145929833885748e-19
ENSG00000170502	NUDT9	4	cg26560020	1	952794	-9.871718862239993	9.978106316349931e-23
ENSG00000109180	OCIAD1	4	cg11122456	11	40612873	-11.31981434725609	2.8804836135197997e-29
ENSG00000185619	PCGF3	4	cg11586658	5	131563581	19.487338131958804	6.869261640731786e-81
ENSG00000185619	PCGF3	4	cg11951449	1	116519025	-13.173184880521328	7.910158697556401e-39
ENSG00000169299	PGM2	4	cg04038500	8	12570225	10.27461894218809	1.8320974298827415e-24
ENSG00000174227	PIGG	4	cg19764325	22	32340710	9.361123212304063	1.2769836957311506e-20
ENSG00000138670	RASGEF1B	4	cg09480837	10	95789501	15.08592709571784	4.549186029067187e-50
ENSG00000159788	RGS12	4	cg06795816	11	71791709	11.255126110191759	5.895154714240108e-29
ENSG00000145423	SFRP2	4	cg05894734	4	40859249	-10.020658782882196	2.3157306871809427e-23
ENSG00000163069	SGCB	4	cg11122456	11	40612873	-23.718353319733726	1.5590837913302504e-116
ENSG00000145217	SLC26A1	4	cg09821533	6	13712174	7.104104923405281	1.4262355313129488e-12
ENSG00000145217	SLC26A1	4	cg13631105	18	29599349	-14.339842164516188	1.6154495870085258e-45
ENSG00000145217	SLC26A1	4	cg15457005	11	11643754	8.504218024109717	2.5451940394945318e-17
ENSG00000145217	SLC26A1	4	cg20822818	11	119235062	10.837846133399754	5.368864909854447e-27
ENSG00000145217	SLC26A1	4	cg21249729	9	138392748	10.917827407158384	2.289857281200666e-27
ENSG00000170365	SMAD1	4	cg03172717	10	51565268	-7.490936920252212	8.353687271076846e-14
ENSG00000269893	SNHG8	4	cg01044331	12	2904352	14.333371756967075	1.742548668113631e-45
ENSG00000269893	SNHG8	4	cg24350395	1	243288625	8.214093346520702	2.849098844662108e-16
ENSG00000269893	SNHG8	4	cg26518628	1	97050305	12.561655907077967	1.5735292217141805e-35
ENSG00000168818	STX18	4	cg02670466	3	47020191	-11.03147871867446	6.727627474524719e-28
ENSG00000168818	STX18	4	cg04640216	11	63439065	12.23373762074591	8.109797748294326e-34
ENSG00000173011	TADA2B	4	cg07817883	1	32538562	-35.193412459616	8.311452660968338e-237
ENSG00000169762	TAPT1	4	cg00140479	22	21356515	-7.08292523973012	1.6578164436333347e-12
ENSG00000169762	TAPT1	4	cg00152757	7	65939507	33.8240645881992	5.396205580081152e-221
ENSG00000169762	TAPT1	4	cg02526508	11	58494370	12.472763618779908	4.626811059889766e-35
ENSG00000132406	TMEM128	4	cg00661438	3	75661320	8.192191096709815	3.4092201855170616e-16
ENSG00000127419	TMEM175	4	cg01799862	16	67143802	-12.13075991837432	2.756548624138125e-33
ENSG00000127419	TMEM175	4	cg15457005	11	11643754	-20.064771448551774	2.0331233670170765e-85
ENSG00000127419	TMEM175	4	cg17687970	8	22462467	-11.597465675032595	1.2990757576974755e-30
ENSG00000127419	TMEM175	4	cg20693608	4	113152836	-12.112078685363473	3.4345738776738684e-33
ENSG00000127419	TMEM175	4	cg20822818	11	119235062	-9.297741148341194	2.294150637738249e-20
ENSG00000033178	UBA6	4	cg20354485	8	134471026	-12.494617486798889	3.546983717720253e-35
ENSG00000071127	WDR1	4	cg15882809	6	26285828	-23.272168187009076	1.603541325681042e-112
ENSG00000071127	WDR1	4	cg26043149	18	55253948	-35.99219591208038	2.7752417809716654e-246
ENSG00000109501	WFS1	4	cg22924550	3	117890213	8.300203515062986	1.4025151958038912e-16
ENSG00000250312	ZNF718	4	cg02664162	19	49469375	15.38369828895408	6.168512384367733e-52
ENSG00000250312	ZNF718	4	cg03720617	16	47527034	24.02772773755383	2.5102573983624987e-119
ENSG00000250312	ZNF718	4	cg11777498	6	89673741	27.092866146204273	1.242875212841799e-148
ENSG00000250312	ZNF718	4	cg14076411	6	89673710	9.542727342524422	2.337034933980437e-21
ENSG00000250312	ZNF718	4	cg15117681	17	80202426	10.83992404098287	5.239627892315196e-27
ENSG00000250312	ZNF718	4	cg15571405	7	130796167	11.65705134618304	6.595155659638573e-31
ENSG00000250312	ZNF718	4	cg16920502	8	133141439	8.226714957136045	2.5707558898487513e-16
ENSG00000250312	ZNF718	4	cg19904905	19	49469667	15.225885777400004	6.104067199914845e-51
ENSG00000250312	ZNF718	4	cg22027879	19	49469965	10.068921797335136	1.4382428237876534e-23
ENSG00000250312	ZNF718	4	cg22672060	4	156464550	18.464530634144847	3.8702284224554044e-73
ENSG00000250312	ZNF718	4	cg22876092	10	88126287	7.636057546125563	2.7807270228112443e-14
ENSG00000182903	ZNF721	4	cg03720617	16	47527034	7.015475414335299	2.677218484842892e-12
ENSG00000182903	ZNF721	4	cg11777498	6	89673741	7.15915938149399	9.60528910101387e-13
ENSG00000182903	ZNF721	4	cg19904905	19	49469667	7.082681034154152	1.6615629243405578e-12
ENSG00000113273	ARSB	5	cg25496680	19	16604089	-8.771727442258305	2.5524641646007077e-18
ENSG00000145781	COMMD10	5	cg20768342	1	85483948	13.451816433075786	2.207072815582661e-40
ENSG00000169570	DTWD2	5	cg06896619	17	61851486	-7.243081164702854	5.22729780961049e-13
ENSG00000170571	EMB	5	cg25512188	6	167093321	12.310772786193164	3.233986009791375e-34
ENSG00000131187	F12	5	cg22159557	15	65067668	-9.098811216275124	1.4053674627182874e-19
ENSG00000173221	GLRX	5	cg26853442	5	161178531	-14.30916140256793	2.4290444443363232e-45
ENSG00000113161	HMGCR	5	cg21683619	1	66070348	8.593641213310512	1.1876381087231257e-17
ENSG00000145495	MARCH6	5	cg02301754	1	151149370	-9.833727716846644	1.4423822061649717e-22
ENSG00000171444	MCC	5	cg05541779	15	45943467	15.295908214015645	2.1994414554513918e-51
ENSG00000171421	MRPL36	5	cg01509141	13	44453359	10.038541408223942	1.9406629745136632e-23
ENSG00000171421	MRPL36	5	cg05226967	18	55102913	12.1759802872079	1.6071504090714178e-33
ENSG00000171421	MRPL36	5	cg06437144	17	45973627	11.484746296551933	4.5969103479009814e-30
ENSG00000171421	MRPL36	5	cg10355989	2	9143982	12.695081906182638	3.082573294593264e-36
ENSG00000112996	MRPS30	5	cg25512188	6	167093321	14.513364567405878	1.4547464244227861e-46
ENSG00000152620	NADK2	5	cg14349131	9	14287483	-7.313229490224498	3.129348331498418e-13
ENSG00000134986	NREP	5	cg07573936	15	55805566	7.072884806259971	1.7809770249947023e-12
ENSG00000164346	NSA2	5	cg07967114	12	94915694	-16.120999218347546	1.0418146157418724e-56
ENSG00000249915	PDCD6	5	cg02377073	8	48920860	-7.1462058146953575	1.054063089910596e-12
ENSG00000145632	PLK2	5	cg08447792	4	110600020	6.975952290540815	3.534883304006325e-12
ENSG00000145725	PPIP5K2	5	cg07451297	17	7486874	8.00100300635042	1.5990475403668997e-15
ENSG00000145725	PPIP5K2	5	cg09663193	17	7486821	9.525824801172622	2.736800296569646e-21
ENSG00000145725	PPIP5K2	5	cg13546736	17	7486858	6.894452265810161	6.249162891193961e-12
ENSG00000129625	REEP5	5	cg24385666	4	2278261	8.55638973992796	1.6319040056075894e-17
ENSG00000073578	SDHA	5	cg19571293	19	1028488	7.690407585978062	1.831755830141668e-14
ENSG00000039123	SKIV2L2	5	cg07387335	15	34781891	-36.14235634918339	5.129252349898062e-248
ENSG00000064651	SLC12A2	5	cg16011800	17	1958478	-11.764534926002447	1.9299522479561782e-31
ENSG00000113504	SLC12A7	5	cg04701034	14	52536175	-12.322436482584704	2.8268204396837933e-34
ENSG00000113504	SLC12A7	5	cg10495084	15	96889416	-9.414780876817476	7.753986783858309e-21
ENSG00000152582	SPEF2	5	cg04521224	2	37332584	13.426187412062271	3.0685958405471878e-40
ENSG00000164296	TIGD6	5	cg15241499	18	76635712	-8.615857983775799	9.822751760154732e-18
ENSG00000174695	TMEM167A	5	cg00774769	1	194400632	21.796040826410998	1.153107495053411e-99
ENSG00000174695	TMEM167A	5	cg06759901	7	126446757	-10.760081470596086	1.2171516116766823e-26
ENSG00000172262	ZNF131	5	cg01111041	6	32121055	-7.2245896264822	5.980528391215028e-13
ENSG00000172262	ZNF131	5	cg02017534	13	46425999	-9.342504676316443	1.5148193413903283e-20
ENSG00000172262	ZNF131	5	cg04105091	6	32121355	-7.7985785844213575	7.91535763561184e-15
ENSG00000172262	ZNF131	5	cg04834502	16	48644360	-6.78701294708208	1.3118224661093818e-11
ENSG00000172262	ZNF131	5	cg05374271	1	192778890	-8.824892582231673	1.6034267679596323e-18
ENSG00000172262	ZNF131	5	cg05454635	15	74657911	-7.281876784793471	3.93858793848396e-13
ENSG00000172262	ZNF131	5	cg05658793	22	18893382	-7.712052213277823	1.5496760888010652e-14
ENSG00000172262	ZNF131	5	cg06264679	6	32121433	-7.039594633200476	2.255946127624246e-12
ENSG00000172262	ZNF131	5	cg08605991	13	46426238	-8.540565915521539	1.866933021158855e-17
ENSG00000172262	ZNF131	5	cg08962798	5	179106333	-7.73256133190985	1.3223914158213962e-14
ENSG00000172262	ZNF131	5	cg10148764	2	101618394	-7.1879958209483545	7.796663324826322e-13
ENSG00000172262	ZNF131	5	cg10883258	5	179239447	13.546760516710316	6.426193904322508e-41
ENSG00000172262	ZNF131	5	cg11099375	17	62141556	-7.506953198245275	7.406522196080204e-14
ENSG00000172262	ZNF131	5	cg12585943	6	32121368	-8.431767991459008	4.68157640063567e-17
ENSG00000172262	ZNF131	5	cg12662887	10	105343920	-9.835119359084436	1.423444361332699e-22
ENSG00000172262	ZNF131	5	cg12979844	13	46425929	-12.205509269988953	1.1331195964873874e-33
ENSG00000172262	ZNF131	5	cg13102294	6	32121393	-7.907475896734122	3.3644804276186286e-15
ENSG00000172262	ZNF131	5	cg13265524	2	202484246	-7.1541151769881965	9.955182722960187e-13
ENSG00000172262	ZNF131	5	cg14269973	13	46425904	-7.466648350496076	1.0025288353968587e-13
ENSG00000172262	ZNF131	5	cg15053190	22	18893313	-7.881363524821839	4.1347904359641294e-15
ENSG00000172262	ZNF131	5	cg16512755	1	32670916	-6.964282006198643	3.837403000057318e-12
ENSG00000172262	ZNF131	5	cg16541026	3	49026934	-9.888290513252457	8.486673641501683e-23
ENSG00000172262	ZNF131	5	cg17108430	4	108745557	-7.692818602649055	1.797553187585971e-14
ENSG00000172262	ZNF131	5	cg19432362	13	46426263	-9.908131564149642	6.992563068043492e-23
ENSG00000172262	ZNF131	5	cg19539667	17	43339831	-7.717104696980095	1.4903486244541966e-14
ENSG00000172262	ZNF131	5	cg21475150	2	101618248	-11.05443157855172	5.24874439066927e-28
ENSG00000172262	ZNF131	5	cg22809047	2	101618261	-8.376580875831921	7.431531019914474e-17
ENSG00000172262	ZNF131	5	cg22956023	2	96675729	-7.720775853388453	1.4486489583113206e-14
ENSG00000172262	ZNF131	5	cg25658983	13	46426026	-13.059112075336028	3.32563874830072e-38
ENSG00000234284	ZNF879	5	cg00012238	18	21718458	7.776895793745004	9.378770346425164e-15
ENSG00000234284	ZNF879	5	cg03026306	18	21718767	10.074978467672283	1.3550190479036297e-23
ENSG00000234284	ZNF879	5	cg03354476	17	7077335	8.602927086574262	1.0977817319032598e-17
ENSG00000234284	ZNF879	5	cg04673465	4	85570164	9.192027303273749	6.034370882063097e-20
ENSG00000234284	ZNF879	5	cg05369942	4	142228617	13.21942412761175	4.3830367187297676e-39
ENSG00000234284	ZNF879	5	cg06235000	7	116593769	7.809632386382566	7.265302299574755e-15
ENSG00000234284	ZNF879	5	cg09259409	1	247654811	7.534090754932353	6.038827406359975e-14
ENSG00000234284	ZNF879	5	cg10044101	6	133084289	13.698413670010117	8.873924934012258e-42
ENSG00000234284	ZNF879	5	cg11805414	4	43132510	-7.695885973953489	1.7566159931933504e-14
ENSG00000234284	ZNF879	5	cg13875033	1	3236688	16.789028079815825	3.4081462678520175e-61
ENSG00000234284	ZNF879	5	cg15473569	17	45854061	12.70693574061156	2.6761073401431157e-36
ENSG00000234284	ZNF879	5	cg17929920	19	11348704	14.013128088110639	1.3530687899961742e-43
ENSG00000234284	ZNF879	5	cg26154268	14	22538783	13.444626826834343	2.4327780009603765e-40
ENSG00000234284	ZNF879	5	cg27087233	6	138860932	9.567459882222861	1.850974283443723e-21
ENSG00000112182	BACH2	6	cg14583999	3	10019040	8.296094180191862	1.450914381848502e-16
ENSG00000112182	BACH2	6	cg14750543	20	4776111	6.9308091526347235	4.851498202135956e-12
ENSG00000112182	BACH2	6	cg24683414	1	92952581	7.157059490249764	9.747602102049429e-13
ENSG00000178409	BEND3	6	cg00561739	5	1807733	9.381481947802364	1.0559140361647516e-20
ENSG00000178409	BEND3	6	cg02447879	17	79393682	7.2494305764719495	4.992107793037824e-13
ENSG00000178409	BEND3	6	cg02796939	17	80545125	7.483758217818571	8.818706819571431e-14
ENSG00000178409	BEND3	6	cg06211255	11	65153842	8.490637727780069	2.8511502856661667e-17
ENSG00000178409	BEND3	6	cg09735822	12	133015059	7.382003627490866	1.88408105199454e-13
ENSG00000178409	BEND3	6	cg10170847	19	41834029	8.234252552254802	2.4154496252603406e-16
ENSG00000178409	BEND3	6	cg11442326	5	1807695	7.067687897222601	1.8480210107556423e-12
ENSG00000178409	BEND3	6	cg12590521	12	121678474	8.985722257203598	3.869157241328995e-19
ENSG00000178409	BEND3	6	cg13274938	17	38493822	7.500740863251301	7.761873765910592e-14
ENSG00000178409	BEND3	6	cg14807793	6	34164564	7.299600138902652	3.4592813045477045e-13
ENSG00000178409	BEND3	6	cg16919680	12	53230033	6.855840559662745	8.168984656517425e-12
ENSG00000178409	BEND3	6	cg17292667	13	110787523	8.561528560500582	1.5621422596227997e-17
ENSG00000178409	BEND3	6	cg17619876	5	1807759	8.292318937444385	1.4968199959163398e-16
ENSG00000178409	BEND3	6	cg19811934	14	92927763	7.308942381654094	3.230044235738822e-13
ENSG00000178409	BEND3	6	cg23634348	4	967822	7.30017737700195	3.4446653108600353e-13
ENSG00000153162	BMP6	6	cg02053265	5	1325068	-8.089093481263715	7.879724850567095e-16
ENSG00000153162	BMP6	6	cg03909886	10	42606808	11.248912386068701	6.298269056422456e-29
ENSG00000198663	C6orf89	6	cg27371125	11	350906	11.773592672670802	1.7497148591071311e-31
ENSG00000164465	DCBLD1	6	cg11177235	1	55089182	-11.436510353283392	7.881487682259827e-30
ENSG00000198719	DLL1	6	cg11474778	8	95487352	7.832934988083027	6.05021737571193e-15
ENSG00000198721	ECI2	6	cg04398060	6	31555671	9.818995344980713	1.6645192007836189e-22
ENSG00000198721	ECI2	6	cg15043642	5	141061863	9.850899633869545	1.2214125499147003e-22
ENSG00000112685	EXOC2	6	cg09625274	15	48413049	20.674658009266967	2.421485571836072e-90
ENSG00000112584	FAM120B	6	cg11474778	8	95487352	8.791393954835177	2.149580141971525e-18
ENSG00000112584	FAM120B	6	cg24041822	14	55493335	-9.884913497810933	8.770737931969867e-23
ENSG00000188820	FAM26F	6	cg14417861	5	138089815	-10.580320921089966	7.996482590460118e-26
ENSG00000118496	FBXO30	6	cg00297432	1	6484784	7.6413462042473626	2.6688428640621323e-14
ENSG00000111846	GCNT2	6	cg10443068	12	57780179	7.687000738489512	1.8800436710521148e-14
ENSG00000137265	IRF4	6	cg01554453	6	132129103	7.353790735861245	2.320821024058618e-13
ENSG00000137265	IRF4	6	cg03553358	16	11350115	-7.131941102200724	1.1673203190406535e-12
ENSG00000185760	KCNQ5	6	cg22072651	11	17375003	-7.172564295233212	8.714783071377768e-13
ENSG00000111885	MAN1A1	6	cg22318509	12	58068506	-41.93540276132284	2.5217e-319
ENSG00000156711	MAPK13	6	cg16830248	11	3493084	-9.941633759992541	5.051698054820071e-23
ENSG00000111912	NCOA7	6	cg05039488	6	79577232	13.286624456928797	1.8471482092938414e-39
ENSG00000146232	NFKBIE	6	cg00133624	12	3756130	7.453381839775615	1.1077443628895633e-13
ENSG00000146232	NFKBIE	6	cg00220721	11	36422443	6.890361865481529	6.432344297072549e-12
ENSG00000146232	NFKBIE	6	cg00499237	2	97169033	9.664196724271111	7.383452240480932e-22
ENSG00000146232	NFKBIE	6	cg01017257	1	15059738	7.194625229414173	7.434784406472289e-13
ENSG00000146232	NFKBIE	6	cg01102826	4	1623797	7.134927563870306	1.1432154801595224e-12
ENSG00000146232	NFKBIE	6	cg01156844	15	85520317	11.352616313136721	2.0093640229698148e-29
ENSG00000146232	NFKBIE	6	cg01228685	8	145031536	8.709077712932263	4.401848740041071e-18
ENSG00000146232	NFKBIE	6	cg01496136	16	57375219	8.16227206066498	4.3547365725420237e-16
ENSG00000146232	NFKBIE	6	cg02043329	13	49740771	7.290269930228239	3.7054720312520217e-13
ENSG00000146232	NFKBIE	6	cg02233149	2	97171243	7.714265604021079	1.5242483258636556e-14
ENSG00000146232	NFKBIE	6	cg02240252	17	47931591	7.604083763224102	3.550175150415675e-14
ENSG00000146232	NFKBIE	6	cg03052004	6	11702389	8.423974371878506	5.002038934530803e-17
ENSG00000146232	NFKBIE	6	cg03078551	17	41656298	7.939122733809554	2.6200006680871423e-15
ENSG00000146232	NFKBIE	6	cg03889450	4	10082415	7.302351147773188	3.391379307884076e-13
ENSG00000146232	NFKBIE	6	cg04011474	2	28904455	10.322836764063247	1.1262034310622608e-24
ENSG00000146232	NFKBIE	6	cg04915300	2	157314925	9.512729980467164	3.1007642827206885e-21
ENSG00000146232	NFKBIE	6	cg05146922	2	10634174	7.361092670745117	2.2003304590314658e-13
ENSG00000146232	NFKBIE	6	cg05265611	1	3129633	11.12402722393667	2.4728715655820914e-28
ENSG00000146232	NFKBIE	6	cg05376738	1	212923780	9.868605554585473	1.0295542966463426e-22
ENSG00000146232	NFKBIE	6	cg05503062	15	90324339	14.590891051173394	5.007644977843085e-47
ENSG00000146232	NFKBIE	6	cg05875421	14	91709951	8.63312298752544	8.47337803283256e-18
ENSG00000146232	NFKBIE	6	cg05991220	3	52813859	7.6513103716228414	2.4743970216755095e-14
ENSG00000146232	NFKBIE	6	cg06169746	3	119419493	9.269337102538504	2.975846121893866e-20
ENSG00000146232	NFKBIE	6	cg06489037	3	107706245	7.403112212556813	1.6114552023473635e-13
ENSG00000146232	NFKBIE	6	cg06764092	1	159796658	13.73184978355334	5.709915472032413e-42
ENSG00000146232	NFKBIE	6	cg07037944	15	64290807	10.203451459771712	3.758330530297971e-24
ENSG00000146232	NFKBIE	6	cg07072405	12	105839243	8.373875420275867	7.607039148843983e-17
ENSG00000146232	NFKBIE	6	cg07136133	11	36422377	19.398589439179485	3.3001727695427856e-80
ENSG00000146232	NFKBIE	6	cg07348809	3	10333196	6.968604181868346	3.724104469418227e-12
ENSG00000146232	NFKBIE	6	cg09340403	6	138247491	8.067762848875642	9.365023568057753e-16
ENSG00000146232	NFKBIE	6	cg09491962	10	98900771	11.440857629327834	7.529402847191806e-30
ENSG00000146232	NFKBIE	6	cg10092518	1	57670054	7.3479779500206375	2.4241461114251883e-13
ENSG00000146232	NFKBIE	6	cg10346111	3	10326661	8.179454533802224	3.7853981524399815e-16
ENSG00000146232	NFKBIE	6	cg11739399	1	206669785	15.259193047248688	3.775376566248499e-51
ENSG00000146232	NFKBIE	6	cg11998932	7	3901843	8.958864693795883	4.918233770785804e-19
ENSG00000146232	NFKBIE	6	cg12251145	6	30124744	7.3618950553145766	2.1873165693647102e-13
ENSG00000146232	NFKBIE	6	cg12424624	3	46718941	7.570209262394669	4.5934887768059486e-14
ENSG00000146232	NFKBIE	6	cg12547807	1	9473751	10.906572667786106	2.5775002911998187e-27
ENSG00000146232	NFKBIE	6	cg14499387	22	31668786	17.56399490956086	1.3432574134227967e-66
ENSG00000146232	NFKBIE	6	cg14689317	11	64128973	8.605393868939501	1.0747536122823485e-17
ENSG00000146232	NFKBIE	6	cg14886629	3	10333655	11.906793170721036	3.7622456161907696e-32
ENSG00000146232	NFKBIE	6	cg15006864	22	18265049	10.788761053061757	9.014621450311024e-27
ENSG00000146232	NFKBIE	6	cg15193228	22	30855332	9.377608864264383	1.0955996977363187e-20
ENSG00000146232	NFKBIE	6	cg16306654	1	6419767	7.648295087229837	2.532250270861496e-14
ENSG00000146232	NFKBIE	6	cg17578639	3	176862949	8.504409749607253	2.539207364248646e-17
ENSG00000146232	NFKBIE	6	cg18008247	3	124719009	7.0972938060333055	1.4968352206979098e-12
ENSG00000146232	NFKBIE	6	cg18372930	5	137939469	8.1230522623668	5.989701632356699e-16
ENSG00000146232	NFKBIE	6	cg18560092	15	71183869	9.354993926065582	1.3510870572803751e-20
ENSG00000146232	NFKBIE	6	cg18984211	2	73498074	9.071099629956356	1.802689286002727e-19
ENSG00000146232	NFKBIE	6	cg19017142	2	64431245	9.129606668751112	1.0633605863554127e-19
ENSG00000146232	NFKBIE	6	cg19268652	6	12119552	18.14601612923911	8.57983149262013e-71
ENSG00000146232	NFKBIE	6	cg19310148	7	26196274	9.807504403471802	1.862760200533409e-22
ENSG00000146232	NFKBIE	6	cg19312404	12	104213449	13.925997744350227	4.3429071509925546e-43
ENSG00000146232	NFKBIE	6	cg19931644	8	12623485	8.25713662864984	2.0021975004676173e-16
ENSG00000146232	NFKBIE	6	cg20359565	17	41043969	8.284119293810905	1.6027081899554315e-16
ENSG00000146232	NFKBIE	6	cg20774552	11	46415316	6.974338391810249	3.5770767726732836e-12
ENSG00000146232	NFKBIE	6	cg21066748	19	46005805	7.725381725767767	1.3987313370525998e-14
ENSG00000146232	NFKBIE	6	cg21301505	1	159796629	10.510817970850765	1.644540744174415e-25
ENSG00000146232	NFKBIE	6	cg21520537	3	10326774	7.835240435053169	5.9453585994638565e-15
ENSG00000146232	NFKBIE	6	cg21529807	19	42134478	8.276070843756466	1.71283356327668e-16
ENSG00000146232	NFKBIE	6	cg21695395	11	128364143	11.889148769770912	4.6145906387182887e-32
ENSG00000146232	NFKBIE	6	cg22444102	18	74175208	10.403040656262005	4.97539242880166e-25
ENSG00000146232	NFKBIE	6	cg22851864	10	5688470	6.995781939241168	3.076024881457876e-12
ENSG00000146232	NFKBIE	6	cg23813257	16	3115286	8.290092087202408	1.5255264939262892e-16
ENSG00000146232	NFKBIE	6	cg23824762	2	97171137	10.905779568256815	2.599426221845918e-27
ENSG00000146232	NFKBIE	6	cg24174557	17	57903544	7.205977301212546	6.848095306550281e-13
ENSG00000146232	NFKBIE	6	cg24449091	1	167773027	8.0569935957507	1.02134244738542e-15
ENSG00000146232	NFKBIE	6	cg24497361	11	3858493	7.160278297029725	9.527004597711403e-13
ENSG00000146232	NFKBIE	6	cg24628310	3	52813873	7.688077678867954	1.8654335199987034e-14
ENSG00000146232	NFKBIE	6	cg24757533	17	74494286	7.814479762795506	6.994732345623767e-15
ENSG00000146232	NFKBIE	6	cg25123427	3	39054994	7.106101899284167	1.4055030056525796e-12
ENSG00000146232	NFKBIE	6	cg25726085	19	14262409	10.053998464748638	1.6679882500278762e-23
ENSG00000146232	NFKBIE	6	cg26471982	8	10701153	6.942082902143972	4.484930589162028e-12
ENSG00000146232	NFKBIE	6	cg26543539	1	156907349	7.2270754749885135	5.876009197027362e-13
ENSG00000146232	NFKBIE	6	cg27134832	3	194815339	6.8242648875305925	1.0160466833783974e-11
ENSG00000146232	NFKBIE	6	cg27663936	11	60162623	7.878958498172951	4.216449597705755e-15
ENSG00000124789	NUP153	6	cg02720013	3	178981100	17.143535021451505	1.2070454286776236e-63
ENSG00000124789	NUP153	6	cg02964182	2	183473236	-27.507086087189148	8.452281284213094e-153
ENSG00000124789	NUP153	6	cg18888697	5	117543966	-6.965341238001557	3.809263343812074e-12
ENSG00000124789	NUP153	6	cg27493342	3	177527009	16.71620744088503	1.0596906715581304e-60
ENSG00000137275	RIPK1	6	cg17609731	7	77325533	-7.48319894164082	8.85886444281728e-14
ENSG00000261584	RP11-457M11.5	6	cg00475820	6	58180155	8.32920719953467	1.10402991533787e-16
ENSG00000124614	RPS10	6	cg16483473	8	99813010	-7.803526934092126	7.621566310186058e-15
ENSG00000112306	RPS12	6	cg05493001	19	52195559	14.144216758448108	2.294041944330842e-44
ENSG00000071242	RPS6KA2	6	cg00931577	5	132299661	7.050266826622612	2.0914508256307163e-12
ENSG00000164483	SAMD3	6	cg23366234	21	45713704	8.35358823135872	9.000355902095222e-17
ENSG00000164483	SAMD3	6	cg26472802	21	45713719	7.794813308962842	8.150438354033284e-15
ENSG00000111897	SERINC1	6	cg03492094	9	91994786	6.8750579612162355	7.149649980743836e-12
ENSG00000111897	SERINC1	6	cg24125648	15	44092606	8.3263229395266265	1.1288434561607545e-16
ENSG00000124786	SLC35B3	6	cg27021529	8	4440491	12.46783006531266	4.909265020304459e-35
ENSG00000112592	TBP	6	cg17505339	1	720865	-8.046899151614992	1.1070002690989633e-15
ENSG00000066651	TRMT11	6	cg05039488	6	79577232	-7.453010830453163	1.1101781941418398e-13
ENSG00000137267	TUBB2A	6	cg17609731	7	77325533	9.482544814370273	4.116853860250707e-21
ENSG00000123552	USP45	6	cg05724197	16	57406044	51.420004215299144	0
ENSG00000123552	USP45	6	cg11190754	5	64858552	9.114328776832098	1.219334384855824e-19
ENSG00000189298	ZKSCAN3	6	cg03438618	10	134748675	9.990458588372805	3.118842589798723e-23
ENSG00000189298	ZKSCAN3	6	cg08823182	1	153514482	-7.193180328621097	7.509747434508164e-13
ENSG00000189298	ZKSCAN3	6	cg13179056	11	50220389	-16.664851768930994	2.3640583666914796e-60
ENSG00000189298	ZKSCAN3	6	cg19808620	1	153514442	-12.195324589424157	1.2783908969844994e-33
ENSG00000189298	ZKSCAN3	6	cg20495738	12	2338399	-7.956792781975994	2.2754041798045277e-15
ENSG00000189298	ZKSCAN3	6	cg22664798	10	134750215	8.733927774710578	3.54555133241674e-18
ENSG00000153975	ZUFSP	6	cg17855130	1	164819399	-10.232121126492514	2.8135035409928096e-24
ENSG00000133627	ACTR3B	7	cg18367110	1	111992173	-11.878017851277002	5.228068503732597e-32
ENSG00000105963	ADAP1	7	cg26451735	15	74494900	-10.980560346700312	1.1668485575150773e-27
ENSG00000133597	ADCK2	7	cg12670123	10	44090827	-8.021235410176322	1.3605631874991545e-15
ENSG00000070669	ASNS	7	cg08143688	14	52216704	-13.01620903510594	5.705950866617445e-38
ENSG00000070669	ASNS	7	cg15395345	8	6946366	9.255666154365134	3.3696123640168016e-20
ENSG00000241468	ATP5J2	7	cg09045935	12	6379348	-15.316220357250678	1.6676878082786422e-51
ENSG00000106009	BRAT1	7	cg16920189	15	100105709	-11.735454965110604	2.700275251861388e-31
ENSG00000146540	C7orf50	7	cg01087832	11	68039514	9.442483420361773	5.98998640932034e-21
ENSG00000146540	C7orf50	7	cg22825631	10	105253538	20.809271463472314	2.0006289382091732e-91
ENSG00000146574	CCZ1B	7	cg01242451	7	97602580	-8.017337339920884	1.4045420613460201e-15
ENSG00000146574	CCZ1B	7	cg01515114	4	4139730	8.470465412050562	3.38362601208722e-17
ENSG00000164649	CDCA7L	7	cg01171355	5	1087281	6.796034468101316	1.2330346038981664e-11
ENSG00000164649	CDCA7L	7	cg01554357	1	164750454	6.903363846426906	5.8735351973107705e-12
ENSG00000164649	CDCA7L	7	cg02959112	1	19978788	7.017787639049521	2.6322128920649184e-12
ENSG00000164649	CDCA7L	7	cg03001176	1	110734136	7.451032749765217	1.1266695292566955e-13
ENSG00000164649	CDCA7L	7	cg03138364	1	164758770	6.8062511333197335	1.1495315135924212e-11
ENSG00000164649	CDCA7L	7	cg03412045	16	77272123	6.987204875719847	3.265987202260588e-12
ENSG00000164649	CDCA7L	7	cg03508052	8	17556355	7.420147186128516	1.4187462862214751e-13
ENSG00000164649	CDCA7L	7	cg04021672	9	34457129	7.261107075387332	4.583595771580226e-13
ENSG00000164649	CDCA7L	7	cg04152326	2	1488314	6.808124810265643	1.134830678222813e-11
ENSG00000164649	CDCA7L	7	cg04697953	2	179299404	6.78829659679889	1.3002059908788898e-11
ENSG00000164649	CDCA7L	7	cg05152713	9	38425359	7.388319689723839	1.797451266162953e-13
ENSG00000164649	CDCA7L	7	cg05934276	4	148984769	7.054443366870589	2.0300945242953706e-12
ENSG00000164649	CDCA7L	7	cg07972805	11	133916608	9.594753672985188	1.4269017147115435e-21
ENSG00000164649	CDCA7L	7	cg08248577	16	19727447	7.9941963516265675	1.6884461818951771e-15
ENSG00000164649	CDCA7L	7	cg08511818	20	30104637	7.208417783574229	6.724324691476128e-13
ENSG00000164649	CDCA7L	7	cg08516247	5	1060773	7.725966543091919	1.3914109595704396e-14
ENSG00000164649	CDCA7L	7	cg08733739	6	13438879	7.219915449123261	6.186220023578903e-13
ENSG00000164649	CDCA7L	7	cg08758727	4	17490571	7.613777031281303	3.294946524563974e-14
ENSG00000164649	CDCA7L	7	cg09107364	6	170060666	8.303117658271795	1.3683853850824121e-16
ENSG00000164649	CDCA7L	7	cg09223698	1	218497686	7.205608608483363	6.862632109752555e-13
ENSG00000164649	CDCA7L	7	cg09769084	1	227091160	6.845290251079462	8.785281529138178e-12
ENSG00000164649	CDCA7L	7	cg09890930	12	56149396	7.554320500694513	5.178170267097587e-14
ENSG00000164649	CDCA7L	7	cg12363746	5	121187445	7.664636956885717	2.2323334752372418e-14
ENSG00000164649	CDCA7L	7	cg12595026	5	1565222	6.902124114163974	5.924433304456747e-12
ENSG00000164649	CDCA7L	7	cg13134763	2	983306	7.645745985838237	2.5804036440634345e-14
ENSG00000164649	CDCA7L	7	cg13290745	5	159655866	6.9345053505517	4.726758944492443e-12
ENSG00000164649	CDCA7L	7	cg14328761	4	188858709	9.554047765162352	2.0973018032122804e-21
ENSG00000164649	CDCA7L	7	cg14886379	13	25468516	6.84312124290476	8.917838048216473e-12
ENSG00000164649	CDCA7L	7	cg15002761	11	133816097	9.126961035449645	1.087614588718089e-19
ENSG00000164649	CDCA7L	7	cg16017429	5	1087252	7.518284953321358	6.799282178137445e-14
ENSG00000164649	CDCA7L	7	cg16493813	8	17521952	7.339639394102654	2.576406376601529e-13
ENSG00000164649	CDCA7L	7	cg17028831	10	95651248	8.712099009251295	4.2832318178126735e-18
ENSG00000164649	CDCA7L	7	cg17512133	4	77973813	7.289374452002336	3.727709493675416e-13
ENSG00000164649	CDCA7L	7	cg17928819	8	58190903	6.809470776271582	1.124384120727321e-11
ENSG00000164649	CDCA7L	7	cg19649018	10	131260468	6.910320365224253	5.595784092581867e-12
ENSG00000164649	CDCA7L	7	cg20880080	18	19780644	7.502705791270484	7.646049392403636e-14
ENSG00000164649	CDCA7L	7	cg21741223	5	1257903	7.649783560129773	2.5017860258487836e-14
ENSG00000164649	CDCA7L	7	cg21863334	20	36157405	7.258922313909198	4.657259862470585e-13
ENSG00000164649	CDCA7L	7	cg21996149	7	155792826	7.147993858094915	1.040213093326651e-12
ENSG00000164649	CDCA7L	7	cg22064182	6	129972878	9.379859159392852	1.0713061283149591e-20
ENSG00000164649	CDCA7L	7	cg22648929	2	1689137	10.73944806748171	1.5128214213181681e-26
ENSG00000164649	CDCA7L	7	cg22825871	6	32043561	6.865329148591101	7.648502401258887e-12
ENSG00000164649	CDCA7L	7	cg22882446	11	111495638	7.186488514355291	7.881090571192847e-13
ENSG00000164649	CDCA7L	7	cg23440144	3	136016212	6.963601150250445	3.855353874411396e-12
ENSG00000164649	CDCA7L	7	cg23653025	3	64442186	6.863498329907994	7.746070276506044e-12
ENSG00000164649	CDCA7L	7	cg24312879	1	6422118	6.859361321283802	7.97105465321649e-12
ENSG00000164649	CDCA7L	7	cg24876577	1	7121446	7.089842693978446	1.5778084510475526e-12
ENSG00000164649	CDCA7L	7	cg24953633	1	201107102	8.87700785694598	1.0138392418256377e-18
ENSG00000164649	CDCA7L	7	cg25189873	13	51915101	7.5323151351537465	6.116065976144861e-14
ENSG00000164649	CDCA7L	7	cg25279555	18	67138568	7.285904391602865	3.823657868890292e-13
ENSG00000164649	CDCA7L	7	cg25636820	19	40424192	6.890800541811072	6.409799330604649e-12
ENSG00000164649	CDCA7L	7	cg26750548	10	88441152	7.311212085649814	3.175933528446824e-13
ENSG00000164649	CDCA7L	7	cg27193813	12	122492914	9.258427260223183	3.2842799018430067e-20
ENSG00000164649	CDCA7L	7	cg27624327	5	510254	7.749715672674654	1.157553599960178e-14
ENSG00000106153	CHCHD2	7	cg13383591	1	15931055	10.641071633850343	4.2479699703976225e-26
ENSG00000106153	CHCHD2	7	cg21232397	9	138408115	7.305102354655142	3.3224043034252895e-13
ENSG00000106603	COA1	7	cg07095337	10	134621275	-11.84107010579103	8.033821688110117e-32
ENSG00000106603	COA1	7	cg09474938	6	30875843	-7.393806265349691	1.7266231881598474e-13
ENSG00000106603	COA1	7	cg19148731	2	74780229	-80.67327380249571	0
ENSG00000091073	DTX2	7	cg16991671	14	54956552	-10.694476327854963	2.432159878067443e-26
ENSG00000117868	ESYT2	7	cg03156396	16	816177	-29.96270926078385	2.805861804735389e-178
ENSG00000117868	ESYT2	7	cg10493855	14	91087586	-21.135438628551498	3.9896986604651384e-94
ENSG00000122687	FTSJ2	7	cg00273068	20	39995747	-25.474986031072007	7.662651880540158e-133
ENSG00000122687	FTSJ2	7	cg04565464	8	145669602	18.791341725130394	1.4093561351245875e-75
ENSG00000122687	FTSJ2	7	cg10628276	19	52430632	-8.47200185214114	3.339520509390195e-17
ENSG00000122687	FTSJ2	7	cg10840412	1	235813424	-8.560105428955016	1.582380497103945e-17
ENSG00000122687	FTSJ2	7	cg11754060	6	12012057	-7.963016088518526	2.1669687781217265e-15
ENSG00000122687	FTSJ2	7	cg13952031	9	101706041	-14.739982225885294	6.228786556809932e-48
ENSG00000122687	FTSJ2	7	cg18949409	2	197036502	-7.435304018848148	1.2679952148991623e-13
ENSG00000122687	FTSJ2	7	cg20589815	10	47656205	6.998333652356375	3.0213072922838515e-12
ENSG00000122687	FTSJ2	7	cg21156815	8	22526736	8.148525708901436	4.870647925022479e-16
ENSG00000122687	FTSJ2	7	cg22232500	2	134024266	-8.582033820554644	1.3124630888696753e-17
ENSG00000122687	FTSJ2	7	cg24247370	13	99142703	-8.335918000145139	1.0435497846859868e-16
ENSG00000122687	FTSJ2	7	cg24694675	1	76082066	20.041848202746436	3.0433434077800656e-85
ENSG00000122687	FTSJ2	7	cg27060622	1	936346	-7.03831644025579	2.2774492147730217e-12
ENSG00000122687	FTSJ2	7	cg27060912	19	6517005	-7.583568326022415	4.150440086562111e-14
ENSG00000146535	GNA12	7	cg01999086	20	52824411	12.37569935539191	1.492243286021156e-34
ENSG00000146535	GNA12	7	cg20812973	2	59470237	8.172154325129448	4.016602184234208e-16
ENSG00000164849	GPR146	7	cg01196712	3	167812510	7.391635282949146	1.7549190119186026e-13
ENSG00000164849	GPR146	7	cg10480062	7	44149037	-9.189455206904482	6.177369497633721e-20
ENSG00000164849	GPR146	7	cg13565492	6	43139072	-12.562634892692397	1.5623844798038867e-35
ENSG00000164849	GPR146	7	cg19849509	2	175204996	-9.317250756451317	1.9151477151086438e-20
ENSG00000164849	GPR146	7	cg22825631	10	105253538	19.024230236782333	2.4429398200530888e-77
ENSG00000164849	GPR146	7	cg26451735	15	74494900	-8.64661623044302	7.546366677148186e-18
ENSG00000106070	GRB10	7	cg01959416	7	150020818	-12.731633301802407	1.9634499478855487e-36
ENSG00000105968	H2AFV	7	cg07461772	16	68482809	-6.986299584924526	3.288721112903443e-12
ENSG00000185811	IKZF1	7	cg01635063	19	728385	8.147195542503052	4.9185751521218e-16
ENSG00000185811	IKZF1	7	cg01919208	3	49170496	7.513407969525774	7.053575837959291e-14
ENSG00000185811	IKZF1	7	cg02954987	3	49170599	8.237240847964957	2.3558642524142294e-16
ENSG00000185811	IKZF1	7	cg05654765	3	49170727	8.332296606095284	1.0742171809822882e-16
ENSG00000185811	IKZF1	7	cg05797770	1	16470667	6.961223927236409	3.9200529373338366e-12
ENSG00000185811	IKZF1	7	cg07876162	19	728176	7.212818704704177	6.512857757526426e-13
ENSG00000185811	IKZF1	7	cg08234664	3	49170668	8.020990043799463	1.3625406371735902e-15
ENSG00000185811	IKZF1	7	cg09092525	20	58570133	8.069403297272208	9.233517193723468e-16
ENSG00000185811	IKZF1	7	cg09322513	16	65555681	10.332502439883022	1.0184627043233573e-24
ENSG00000185811	IKZF1	7	cg11566975	3	49170849	7.867878184569732	4.597061618281109e-15
ENSG00000185811	IKZF1	7	cg11693709	15	40542019	7.200060676387645	7.143735321140342e-13
ENSG00000185811	IKZF1	7	cg14071869	6	41624407	7.920253051713143	3.040181104666787e-15
ENSG00000185811	IKZF1	7	cg14099457	3	49170794	8.501250416159323	2.6050869835591052e-17
ENSG00000185811	IKZF1	7	cg16832295	19	728095	8.75816641758698	2.870926638819831e-18
ENSG00000185811	IKZF1	7	cg24750513	2	127819455	8.009284071989164	1.4964585169798195e-15
ENSG00000185811	IKZF1	7	cg25764534	8	22485721	9.242781285059408	3.790067059546369e-20
ENSG00000185811	IKZF1	7	cg27183173	19	728040	7.246196940059583	5.109793125553041e-13
ENSG00000186480	INSIG1	7	cg05348982	12	81331012	7.592661001634647	3.8702589400045813e-14
ENSG00000186480	INSIG1	7	cg14358282	2	219866628	12.574543846005565	1.344609845997963e-35
ENSG00000186480	INSIG1	7	cg15721666	12	120799597	27.777059875876922	1.5249053824797803e-155
ENSG00000186480	INSIG1	7	cg18666004	3	42003746	12.38895031695723	1.2687852256293882e-34
ENSG00000170852	KBTBD2	7	cg11315021	6	168580545	-9.092365847041538	1.4869621100249352e-19
ENSG00000165055	METTL2B	7	cg05357861	7	51460827	12.76635195662909	1.2867560849711886e-36
ENSG00000165055	METTL2B	7	cg18976797	7	56434617	12.425610979048365	8.201294830698855e-35
ENSG00000164877	MICALL2	7	cg01762827	16	69141442	7.48412972484736	8.79977398026727e-14
ENSG00000164877	MICALL2	7	cg02637438	8	134584246	37.1090122264826	1.892724841433834e-259
ENSG00000146918	NCAPG2	7	cg03156396	16	816177	-13.141625936940219	1.1706354393080773e-38
ENSG00000146918	NCAPG2	7	cg10493855	14	91087586	-7.543992888169427	5.599265602077831e-14
ENSG00000146918	NCAPG2	7	cg11275626	17	47841347	-8.91830620107537	7.039239739211718e-19
ENSG00000122643	NT5C3A	7	cg22748443	7	14030992	8.213042366617518	2.8741478546865427e-16
ENSG00000164815	ORC5	7	cg10681811	5	76904661	-8.615074863775398	9.883018944840931e-18
ENSG00000164776	PHKG1	7	cg10543376	6	33137989	-7.883903103366749	4.053312505551588e-15
ENSG00000164776	PHKG1	7	cg17801256	1	35734334	7.092662166409045	1.5466788917535333e-12
ENSG00000164776	PHKG1	7	cg18071532	12	48357234	-8.406663016059053	5.779710018530999e-17
ENSG00000164776	PHKG1	7	cg22792862	14	67827087	-11.055964968594573	5.164727266042367e-28
ENSG00000122678	POLM	7	cg19148731	2	74780229	-7.57703027471799	4.3625403243753886e-14
ENSG00000168255	POLR2J3	7	cg12791476	7	44059249	10.601698152897738	6.410540248905584e-26
ENSG00000168255	POLR2J3	7	cg16782613	7	44058922	9.937508272500315	5.252221214162876e-23
ENSG00000168255	POLR2J3	7	cg19008921	4	42387381	10.209233829325274	3.5451323328669374e-24
ENSG00000135213	POM121C	7	cg19116668	7	99932089	10.535922189534844	1.2683350514625463e-25
ENSG00000155093	PTPRN2	7	cg01852244	16	47494711	-7.336387558078096	2.6395076785803706e-13
ENSG00000155093	PTPRN2	7	cg21244846	9	27529339	-7.1686831346488615	8.964062207864326e-13
ENSG00000170667	RASA4B	7	cg12791476	7	44059249	10.307937938004851	1.3094616310418462e-24
ENSG00000170667	RASA4B	7	cg21537297	8	144298583	-6.86904711034053	7.456942406616198e-12
ENSG00000146587	RBAK	7	cg17877470	19	9903989	7.683997429316402	1.924438524251714e-14
ENSG00000105982	RNF32	7	cg13379408	18	11909052	18.66633317680812	1.201060694460857e-74
ENSG00000205060	SLC35B4	7	cg17931180	7	39770703	-29.060790703053414	9.409590484817445e-169
ENSG00000205060	SLC35B4	7	cg20361427	7	7610535	8.245340427199311	2.2045782681362274e-16
ENSG00000197157	SND1	7	cg07302293	11	64391697	10.392858472869674	5.51895459957691e-25
ENSG00000232956	SNHG15	7	cg16454099	7	92818323	-9.291259493664583	2.4331846252570538e-20
ENSG00000127952	STYXL1	7	cg03694936	5	140179490	8.070729188727853	9.140777804525514e-16
ENSG00000177683	THAP5	7	cg05171921	7	157917118	-27.08317689338768	1.4719414124845703e-148
ENSG00000177683	THAP5	7	cg12812167	1	155054054	7.5863708087204484	4.060615856581245e-14
ENSG00000177683	THAP5	7	cg19501543	1	35875651	-11.2554480375939	5.860172722835592e-29
ENSG00000196683	TOMM7	7	cg09373786	8	93156639	7.68827756396138	1.8617503362462627e-14
ENSG00000158457	TSPAN33	7	cg03016975	19	4124072	-15.846525667791374	6.606803131150559e-55
ENSG00000158457	TSPAN33	7	cg24748945	19	4123852	25.988044954505817	8.998629218405983e-138
ENSG00000198874	TYW1	7	cg08005007	3	116079127	-9.489466747764325	3.854237520933671e-21
ENSG00000198874	TYW1	7	cg08897010	7	7504884	-10.70366730397858	2.2059402329150663e-26
ENSG00000006715	VPS41	7	cg01809281	2	24162256	10.53640844198522	1.2598562255787577e-25
ENSG00000126870	WDR60	7	cg03156396	16	816177	14.060422007550908	7.106060392640696e-44
ENSG00000126870	WDR60	7	cg10493855	14	91087586	10.930833990378853	1.9830296782183165e-27
ENSG00000126870	WDR60	7	cg16641210	22	18957864	-15.349483415460789	1.0068146633285432e-51
ENSG00000126870	WDR60	7	cg21167628	1	45308625	-17.330131303226416	5.9388176448713065e-65
ENSG00000126870	WDR60	7	cg22654137	21	45791428	-18.19732309805333	3.5443206098000033e-71
ENSG00000126870	WDR60	7	cg25895971	17	77904396	-9.389419917929908	9.802925682613877e-21
ENSG00000178381	ZFAND2A	7	cg06548193	7	47293799	9.557488905189206	2.0336033289611004e-21
ENSG00000178381	ZFAND2A	7	cg13565492	6	43139072	8.08882055898951	7.901849446119587e-16
ENSG00000178381	ZFAND2A	7	cg21284400	1	149981654	9.255040358514716	3.392812965068113e-20
ENSG00000178381	ZFAND2A	7	cg21384718	1	21503451	18.00452500488713	9.201509854016827e-70
ENSG00000196247	ZNF107	7	cg09378456	7	117313730	-7.841292958830713	5.66608037567212e-15
ENSG00000152926	ZNF117	7	cg23514324	3	12329213	7.4233934332212845	1.3850423282712718e-13
ENSG00000170260	ZNF212	7	cg24536146	1	207997166	7.6527382185020505	2.44719407252258e-14
ENSG00000198039	ZNF273	7	cg13168221	1	22962032	10.091696667879063	1.1457695776038674e-23
ENSG00000204947	ZNF425	7	cg02491905	2	10975305	9.56598966599343	1.8761586979713065e-21
ENSG00000204947	ZNF425	7	cg03585764	5	179554555	7.9390125457952685	2.6219678097169495e-15
ENSG00000204947	ZNF425	7	cg06181697	3	50294603	8.326586466500553	1.1273831313673149e-16
ENSG00000204947	ZNF425	7	cg07085827	2	132121676	7.029516814966006	2.4236470387220733e-12
ENSG00000204947	ZNF425	7	cg08328067	5	179553589	6.823398548194762	1.0220548766366395e-11
ENSG00000204947	ZNF425	7	cg10899547	5	179554111	12.091490977708482	4.360957261125443e-33
ENSG00000204947	ZNF425	7	cg10996931	5	179553922	9.660000200224331	7.683059627073053e-22
ENSG00000204947	ZNF425	7	cg16026035	5	70742893	16.382203178272913	1.9221646675852682e-58
ENSG00000204947	ZNF425	7	cg17500055	1	235805560	7.123142744901014	1.2439634821462274e-12
ENSG00000204947	ZNF425	7	cg22076160	1	235805690	7.859224629772113	4.9243974565048766e-15
ENSG00000204947	ZNF425	7	cg24066641	5	179554466	7.461474873753922	1.0425439693130705e-13
ENSG00000181444	ZNF467	7	cg05595469	21	47845863	-8.012255585318602	1.463349346181716e-15
ENSG00000181220	ZNF746	7	cg09381003	19	41082314	7.529268056662086	6.263184036161608e-14
ENSG00000181220	ZNF746	7	cg13063704	3	48885665	7.844403869993349	5.53369037744211e-15
ENSG00000181220	ZNF746	7	cg16323609	3	48885591	7.178281862208516	8.367708417644955e-13
ENSG00000181220	ZNF746	7	cg24164563	17	74136395	6.855635744347963	8.183425436841196e-12
ENSG00000204946	ZNF783	7	cg02717166	17	42767007	6.784570293353332	1.3343118024841783e-11
ENSG00000158669	AGPAT6	8	cg01818648	8	30515364	7.139925118038896	1.1025068304176425e-12
ENSG00000158669	AGPAT6	8	cg01970784	8	10191983	-28.040394450375363	3.2924244044588105e-158
ENSG00000177335	C8orf31	8	cg08639523	1	228645117	7.9430592009995005	2.5411314848709543e-15
ENSG00000177335	C8orf31	8	cg15892115	18	55102922	7.987469312257434	1.784349727376039e-15
ENSG00000182307	C8orf33	8	cg09960435	19	44323775	-41.43217096822432	9.84528415113e-313
ENSG00000182307	C8orf33	8	cg21304619	7	157292018	-8.526074108658952	2.1140771666798012e-17
ENSG00000185015	CA13	8	cg26883884	1	63874464	-18.857462112491216	4.3672738781093e-76
ENSG00000104267	CA2	8	cg01769354	16	55960809	10.876747903403265	3.534027147864281e-27
ENSG00000104267	CA2	8	cg26883884	1	63874464	7.6024122074544564	3.593436128861833e-14
ENSG00000259758	CASC7	8	cg08444427	17	41987800	8.352693858063226	9.069671194180212e-17
ENSG00000182372	CLN8	8	cg22838003	14	96730482	9.209135040188107	5.155126189096849e-20
ENSG00000164821	DEFA4	8	cg11829072	8	125463024	-7.949707681111259	2.4068090106097665e-15
ENSG00000105339	DENND3	8	cg09038155	4	139937227	-9.11138076288112	1.252641452889593e-19
ENSG00000104412	EMC2	8	cg03887614	1	167132039	11.432079643248374	8.274609168635737e-30
ENSG00000104714	ERICH1	8	cg03987003	1	145516092	-15.997885370516016	6.684479690304433e-56
ENSG00000104714	ERICH1	8	cg04330631	6	42018203	-6.876533690510467	7.0766099188397865e-12
ENSG00000104714	ERICH1	8	cg05461259	1	2344699	-8.454464569601129	3.866575965853403e-17
ENSG00000104714	ERICH1	8	cg06623486	1	162531613	-12.193039496282855	1.3112946848420376e-33
ENSG00000104714	ERICH1	8	cg06826115	15	67835137	11.172902731988367	1.4464766055448476e-28
ENSG00000104714	ERICH1	8	cg07031794	2	26568949	-7.2575221091985895	4.704672366278676e-13
ENSG00000104714	ERICH1	8	cg08598838	16	74331079	-8.216546759258096	2.79178727162126e-16
ENSG00000104714	ERICH1	8	cg14721618	17	76356197	-7.177532543571051	8.407129878857629e-13
ENSG00000104714	ERICH1	8	cg15231902	12	56618064	12.729256122475933	2.0209903900688347e-36
ENSG00000104714	ERICH1	8	cg20325293	4	54244256	-9.697306249249348	5.369416070478792e-22
ENSG00000104714	ERICH1	8	cg21653878	19	54606055	24.990757251718538	2.7417238611784795e-128
ENSG00000104714	ERICH1	8	cg24077454	10	119134782	7.375515563771639	1.9762274076342746e-13
ENSG00000104714	ERICH1	8	cg24639504	13	25875833	-8.650271724660312	7.302688966945583e-18
ENSG00000104714	ERICH1	8	cg25220460	8	123792839	14.71852910205528	8.326796448765748e-48
ENSG00000104714	ERICH1	8	cg25680245	18	19284821	-14.282708467266884	3.4790334018473865e-45
ENSG00000104714	ERICH1	8	cg25775109	19	5823786	7.358007411257844	2.2495313402758887e-13
ENSG00000180921	FAM83H	8	cg04423064	8	37887926	7.821739221963058	6.6198658200799684e-15
ENSG00000180921	FAM83H	8	cg23488616	6	159065864	-12.277455824820953	4.8845209239142655e-34
ENSG00000104290	FZD3	8	cg25344142	1	230882603	11.746088499083934	2.3870830111298225e-31
ENSG00000250571	GLI4	8	cg03237324	12	6420052	7.219895481943571	6.194816747529329e-13
ENSG00000131203	IDO1	8	cg08232855	5	65976586	8.021484729044204	1.357236418297073e-15
ENSG00000131203	IDO1	8	cg08232967	14	32676804	7.832146536114432	6.086649712936491e-15
ENSG00000176595	KBTBD11	8	cg11013298	12	14927928	6.842738310510756	8.941443269131838e-12
ENSG00000154359	LONRF1	8	cg24533060	2	124445381	-8.129017093084137	5.701738131881023e-16
ENSG00000204839	MROH6	8	cg08017606	5	145316274	-8.413890813389633	5.453258957806607e-17
ENSG00000036448	MYOM2	8	cg09379965	12	120541737	-7.930177713549161	2.810416145680596e-15
ENSG00000036448	MYOM2	8	cg12150457	5	140165687	-7.864389008325619	4.725305419476809e-15
ENSG00000147813	NAPRT1	8	cg00170236	7	99691604	-7.822380140837892	6.5844007951331685e-15
ENSG00000147813	NAPRT1	8	cg08017606	5	145316274	-27.143937985241003	4.554201580937154e-149
ENSG00000147813	NAPRT1	8	cg08021797	16	85785130	-9.282622522432504	2.6409630704886553e-20
ENSG00000136999	NOV	8	cg18083764	5	4230848	9.054152708426017	2.096648505537899e-19
ENSG00000176623	RMDN1	8	cg04993564	8	59572049	-11.377878619850778	1.5128592225217954e-29
ENSG00000176623	RMDN1	8	cg27317242	8	23145699	-7.764863915483248	1.0290187428956063e-14
ENSG00000008988	RPS20	8	cg23353000	17	42120896	9.849406665231912	1.238904056045497e-22
ENSG00000048392	RRM2B	8	cg23101686	19	54191152	-10.187396905526654	4.407925290621397e-24
ENSG00000169439	SDC2	8	cg01892528	22	43485485	12.806450203777848	7.801179368074575e-37
ENSG00000182319	SGK223	8	cg07554966	3	75483803	7.232772227541185	5.634507364104706e-13
ENSG00000182319	SGK223	8	cg09603584	11	3443969	9.943247400982951	4.9569046829543304e-23
ENSG00000182319	SGK223	8	cg22740527	7	6909121	-8.895264423603631	8.630020603086757e-19
ENSG00000182319	SGK223	8	cg24533060	2	124445381	11.714795333923167	3.4071893281926033e-31
ENSG00000182319	SGK223	8	cg26278703	11	58910052	-8.061977671050554	9.803386566925185e-16
ENSG00000104549	SQLE	8	cg07936030	17	36756043	-8.928239943090231	6.4494605629261385e-19
ENSG00000104549	SQLE	8	cg21197958	17	36741386	-7.144105189232462	1.06992591311806e-12
ENSG00000104549	SQLE	8	cg21717017	15	74189922	-10.195250399925229	4.0753924704380334e-24
ENSG00000147526	TACC1	8	cg16538531	4	174447292	9.382554852743398	1.046318354447754e-20
ENSG00000104689	TNFRSF10A	8	cg27389205	2	8842692	13.416171663035575	3.515822664007189e-40
ENSG00000160949	TONSL	8	cg04780572	1	111097901	-8.528975588245432	2.065888536648029e-17
ENSG00000171045	TSNARE1	8	cg02128325	5	139422822	14.152541082685133	2.0578210676270969e-44
ENSG00000171045	TSNARE1	8	cg02917321	22	38215204	-6.922756326829181	5.1326648845578955e-12
ENSG00000171045	TSNARE1	8	cg03975235	22	38220611	9.993624515802843	3.0258714621971465e-23
ENSG00000171045	TSNARE1	8	cg06427514	17	40332731	10.306166625274779	1.3327242885322395e-24
ENSG00000171045	TSNARE1	8	cg07416664	22	38221485	9.863517032175235	1.0811864214803599e-22
ENSG00000171044	XKR6	8	cg26278703	11	58910052	8.033633432182606	1.2316275022569105e-15
ENSG00000137135	ARHGEF39	9	cg13039545	6	159307870	13.390426098262974	4.9054902321258065e-40
ENSG00000086062	B4GALT1	9	cg04842962	6	43655489	63.75366958274864	0
ENSG00000086062	B4GALT1	9	cg13401071	1	49061762	-12.942093778165544	1.4480225200422191e-37
ENSG00000086062	B4GALT1	9	cg13407601	9	140615230	-8.405193252752728	5.853101090611748e-17
ENSG00000086062	B4GALT1	9	cg20290983	6	43655470	64.9832834285621	0
ENSG00000169925	BRD3	9	cg09256781	7	23145220	15.072473436824463	5.5541047882961e-50
ENSG00000169925	BRD3	9	cg09606090	17	46184889	13.35784271750624	7.441289839719165e-40
ENSG00000169925	BRD3	9	cg09836344	4	1243392	34.09670231519521	4.510076854376473e-224
ENSG00000169925	BRD3	9	cg10765909	12	53715428	24.33483981685867	3.792326581896803e-122
ENSG00000169925	BRD3	9	cg12583927	10	61469753	10.076778485473293	1.3304045737160196e-23
ENSG00000180539	C9orf139	9	cg03128972	17	19140659	6.943789476497144	4.435797160597799e-12
ENSG00000180539	C9orf139	9	cg16658931	19	51171061	17.24594041556767	2.4259683233511874e-64
ENSG00000183784	C9orf66	9	cg00339657	2	114194541	13.165122264913977	8.689277147776699e-39
ENSG00000165181	C9orf84	9	cg07018260	11	10536864	8.787039405955259	2.2335125761146143e-18
ENSG00000187796	CARD9	9	cg11586158	1	175013920	-7.30074697287568	3.434771660442138e-13
ENSG00000187796	CARD9	9	cg20907517	20	47894756	-8.072274060702133	9.04325886681043e-16
ENSG00000172785	CBWD1	9	cg05613063	2	114256454	10.422389979227296	4.0723275162157373e-25
ENSG00000172785	CBWD1	9	cg16839353	2	114256421	13.5080830383574	1.0613386580921758e-40
ENSG00000172785	CBWD1	9	cg21274067	2	114341111	-12.688273617583317	3.347504272384369e-36
ENSG00000197816	CCDC180	9	cg08081379	13	41496707	17.039160955578172	6.474642488829243e-63
ENSG00000197816	CCDC180	9	cg11608447	9	38620746	-6.99846049039279	3.018606808121365e-12
ENSG00000197816	CCDC180	9	cg17605235	9	38619909	-22.103001811795615	2.8955743921950637e-102
ENSG00000135047	CTSL	9	cg07336754	12	48921782	7.937859316643766	2.6439522615388845e-15
ENSG00000135047	CTSL	9	cg24436365	6	63940138	14.419326071853558	5.338472160703217e-46
ENSG00000233013	FAM157B	9	cg06370057	10	119786	-15.710635170405931	4.985672336688191e-54
ENSG00000165716	FAM69B	9	cg12632152	4	123748753	-9.439301057817707	6.190365795964678e-21
ENSG00000165716	FAM69B	9	cg12658129	18	19320803	-7.531273217298371	6.176905016083138e-14
ENSG00000165716	FAM69B	9	cg12661452	12	125550210	-8.407550513305596	5.752577057253748e-17
ENSG00000165716	FAM69B	9	cg12661964	17	41157777	-11.421259583658074	9.434591836129067e-30
ENSG00000187210	GCNT1	9	cg00894352	5	269864	-11.956094345287216	2.1148734340163555e-32
ENSG00000165702	GFI1B	9	cg05683445	16	28303182	7.279984990268732	3.9956053755218576e-13
ENSG00000165702	GFI1B	9	cg13662290	7	150264311	7.438227903685113	1.2406820345791684e-13
ENSG00000136935	GOLGA1	9	cg08577341	5	167001123	9.234105828303052	4.105952865245623e-20
ENSG00000125484	GTF3C4	9	cg21242079	15	79101063	8.7780246268852	2.4183077970201206e-18
ENSG00000148110	HIATL1	9	cg03269218	10	96990700	-22.365956296764534	1.5293539816715564e-104
ENSG00000148110	HIATL1	9	cg04578362	2	145592759	-11.133248945855893	2.2331436322443095e-28
ENSG00000148110	HIATL1	9	cg06570967	10	96989650	-17.26612307310435	1.6830926322348138e-64
ENSG00000148110	HIATL1	9	cg15229496	18	45939850	-13.869055376858244	9.24160709930324e-43
ENSG00000148110	HIATL1	9	cg15233961	10	96990543	-24.167199409777997	1.2954373879317264e-120
ENSG00000148110	HIATL1	9	cg15454820	10	96990858	-21.320042094868203	1.1853903402146306e-95
ENSG00000148110	HIATL1	9	cg16301728	2	187717549	-6.976503097246432	3.522142990160641e-12
ENSG00000148110	HIATL1	9	cg21522988	12	29376872	-8.26557463767898	1.8667807270146954e-16
ENSG00000148110	HIATL1	9	cg22186515	6	106533997	-7.770980018275564	9.816130943863022e-15
ENSG00000148110	HIATL1	9	cg22242585	2	216659791	-11.74490493377495	2.419617485512817e-31
ENSG00000148384	INPP5E	9	cg11586158	1	175013920	-22.140978753832552	1.462557922792982e-102
ENSG00000148384	INPP5E	9	cg12305805	4	93103551	-9.747108038313423	3.346209781667022e-22
ENSG00000106780	MEGF9	9	cg20963267	11	85568704	10.86860100542688	3.859243095552437e-27
ENSG00000095380	NANS	9	cg04902542	17	77920130	10.06439368682071	1.503812002074736e-23
ENSG00000136811	ODF2	9	cg01335566	1	6200312	-6.936103122549367	4.67992597338806e-12
ENSG00000160539	PPAPDC3	9	cg18638253	2	158485309	39.90874014304879	9.013340373917665e-294
ENSG00000160539	PPAPDC3	9	cg18638867	19	42784593	7.0882185705867045	1.5967085407423145e-12
ENSG00000160539	PPAPDC3	9	cg18644710	2	201172048	10.436640006484895	3.5240961413955654e-25
ENSG00000160539	PPAPDC3	9	cg18649979	19	21688263	13.857376255275968	1.0806295923161219e-42
ENSG00000160539	PPAPDC3	9	cg18651900	20	48553533	12.507046929998973	3.061262028866676e-35
ENSG00000160539	PPAPDC3	9	cg18652121	3	179322868	8.97881180238247	4.1161819919517744e-19
ENSG00000160539	PPAPDC3	9	cg18655928	19	19030652	8.752026643235956	3.030934786380951e-18
ENSG00000196422	PPP1R26	9	cg24140801	8	30588816	-9.126805492566184	1.0905387679001042e-19
ENSG00000095261	PSMD5	9	cg20963267	11	85568704	-11.590056769958572	1.4075516511211205e-30
ENSG00000095303	PTGS1	9	cg15693780	8	117543400	-7.690422282473674	1.8311483963700702e-14
ENSG00000095303	PTGS1	9	cg24278634	12	29409865	-7.506716547457343	7.420101266904182e-14
ENSG00000138835	RGS3	9	cg16187340	5	134527362	20.48447404369871	8.762219032167517e-89
ENSG00000235117	RP11-229P13.20	9	cg16658931	19	51171061	-8.423679765778223	5.0242885602956085e-17
ENSG00000148396	SEC16A	9	cg11586158	1	175013920	14.814019914662198	2.232143056642529e-48
ENSG00000167114	SLC27A4	9	cg10865363	17	75553599	-9.239121317422015	3.935059625231051e-20
ENSG00000157303	SUSD3	9	cg25557739	14	97744285	7.326103603323552	2.847828949790877e-13
ENSG00000165025	SYK	9	cg17392047	11	65247138	-10.06927521667502	1.4305286169860873e-23
ENSG00000136869	TLR4	9	cg02679172	2	137516269	7.684008033068917	1.923235761924526e-14
ENSG00000137038	TMEM261	9	cg02865593	15	25414716	7.819391015943254	6.725237434634172e-15
ENSG00000137038	TMEM261	9	cg24152845	15	25414763	7.526930297542393	6.369270564571447e-14
ENSG00000155158	TTC39B	9	cg01626918	12	75978785	-9.23750412963247	3.978055366057691e-20
ENSG00000165006	UBAP1	9	cg15483228	11	129685597	12.445693037222512	6.449859039640732e-35
ENSG00000107341	UBE2R2	9	cg05559398	11	129685425	8.578038978341674	1.3579967056599229e-17
ENSG00000107341	UBE2R2	9	cg14376988	9	99179801	10.536929215723774	1.255895755028821e-25
ENSG00000107341	UBE2R2	9	cg15483228	11	129685597	14.727998858694225	7.370344846241334e-48
ENSG00000107341	UBE2R2	9	cg18896967	11	129685428	11.10855132712394	2.9266117527231245e-28
ENSG00000196363	WDR5	9	cg15130459	5	40834228	7.522722377368669	6.579412388848044e-14
ENSG00000186130	ZBTB6	9	cg01321174	4	1041044	7.80265937916113	7.667600309113833e-15
ENSG00000186130	ZBTB6	9	cg07452164	7	72993570	8.81604497509103	1.732834512575175e-18
ENSG00000186130	ZBTB6	9	cg08231870	10	103070372	16.4665809559247	5.181785044388386e-59
ENSG00000186130	ZBTB6	9	cg09759458	19	480216	7.502407577360806	7.664747465513469e-14
ENSG00000186130	ZBTB6	9	cg10825234	4	1041061	8.210645318245895	2.9313587377282433e-16
ENSG00000186130	ZBTB6	9	cg11258452	12	119594454	13.636381773371031	1.993562904380282e-41
ENSG00000186130	ZBTB6	9	cg12645616	10	103070480	15.764802019871203	2.2202405857531777e-54
ENSG00000186130	ZBTB6	9	cg16819381	10	103070855	8.005440235540886	1.5436908884215868e-15
ENSG00000186130	ZBTB6	9	cg22511633	7	72993507	9.78799163958704	2.246625241073773e-22
ENSG00000186130	ZBTB6	9	cg23873525	10	103070221	13.176585851666836	7.525337198438775e-39
ENSG00000186130	ZBTB6	9	cg24472574	10	103070503	13.423420559956256	3.1848318382610914e-40
ENSG00000186130	ZBTB6	9	cg25221919	1	234845770	10.574985709615556	8.450321960524341e-26
ENSG00000136870	ZNF189	9	cg20554353	7	72839549	7.664000262998012	2.2433947957357156e-14
ENSG00000136754	ABI1	10	cg21119375	2	44393385	-10.21154350776109	3.46038974775529e-24
ENSG00000122359	ANXA11	10	cg16634718	10	52496341	-18.046124207004226	4.5339200688934694e-70
ENSG00000148655	C10orf11	10	cg02972559	1	45454343	8.43251382593089	4.6516136473016094e-17
ENSG00000148600	CDHR1	10	cg05233863	7	130743581	8.691343784209835	5.1252616215413615e-18
ENSG00000108094	CUL2	10	cg07371052	3	184528481	11.788981528153244	1.457754485463246e-31
ENSG00000151240	DIP2C	10	cg04242021	8	121137288	10.952956275751239	1.5652455279983702e-27
ENSG00000151240	DIP2C	10	cg07154754	12	132514292	9.330787501499119	1.687866656634864e-20
ENSG00000151640	DPYSL4	10	cg05100518	18	76277599	8.52389582087975	2.1510538086386034e-17
ENSG00000151640	DPYSL4	10	cg13401811	12	52345646	7.234637517039456	5.559542508953377e-13
ENSG00000107937	GTPBP4	10	cg23677780	14	94173060	-9.271711322311853	2.908062620337593e-20
ENSG00000152804	HHEX	10	cg20553394	11	64879336	-12.317160692110345	3.0025311012448647e-34
ENSG00000169813	HNRNPF	10	cg05295236	10	135192197	-9.730083618167784	3.9237729537218676e-22
ENSG00000169813	HNRNPF	10	cg05487635	10	28287999	-30.0843012972989	1.4561964536024699e-179
ENSG00000068383	INPP5A	10	cg12496411	7	87849561	-9.968183385006313	3.8879553858207426e-23
ENSG00000138160	KIF11	10	cg15605858	15	29395932	-7.436274068975504	1.2581844894556954e-13
ENSG00000138160	KIF11	10	cg20553394	11	64879336	-8.143853937020385	5.055426983503557e-16
ENSG00000107929	LARP4B	10	cg21586865	7	5230329	10.18144974908656	4.677899593258207e-24
ENSG00000107968	MAP3K8	10	cg00710870	7	102793411	13.248846634728212	2.9926403738371226e-39
ENSG00000165406	MARCH8	10	cg14286514	9	32525315	7.11759359706876	1.2940038730260627e-12
ENSG00000120539	MASTL	10	cg09039782	17	43662154	19.287569647774152	2.334861598350094e-79
ENSG00000120539	MASTL	10	cg15815349	17	30334793	8.047369525784172	1.10303790851312e-15
ENSG00000203791	METTL10	10	cg04522694	19	7598942	12.584744751078148	1.189265656182987e-35
ENSG00000148824	MTG1	10	cg22844232	3	193776047	-20.15956205726219	3.470834045532553e-86
ENSG00000173145	NOC3L	10	cg04839274	20	30160903	8.244951566312425	2.2116401286289243e-16
ENSG00000148572	NRBF2	10	cg14819942	15	35414228	-13.926022891031556	4.312893832041046e-43
ENSG00000108187	PBLD	10	cg04882175	6	131122610	-6.881329896306947	6.847932279429102e-12
ENSG00000175470	PPP2R2D	10	cg14141517	6	33538979	-12.406424172103323	1.0295135626542263e-34
ENSG00000171813	PWWP2B	10	cg26816583	1	8418613	12.36175995889829	1.7649947002213388e-34
ENSG00000152464	RPP38	10	cg08143688	14	52216704	7.971725140750887	2.0205024037685727e-15
ENSG00000198964	SGMS1	10	cg13365279	6	107390070	19.62792157707104	5.377131159463586e-82
ENSG00000198964	SGMS1	10	cg18558237	10	81444220	19.21472491809466	8.430538910495396e-79
ENSG00000198964	SGMS1	10	cg27420365	10	81444725	53.801447880641604	0
ENSG00000165752	STK32C	10	cg11911399	1	108742837	-19.481774046149692	7.4079969127292e-81
ENSG00000165752	STK32C	10	cg26816583	1	8418613	9.931086781584678	5.589794688447218e-23
ENSG00000133678	TMEM254	10	cg16634718	10	52496341	9.181085009641421	6.659768521500213e-20
ENSG00000165637	VDAC2	10	cg02972559	1	45454343	10.362125993246053	7.537473149852054e-25
ENSG00000062650	WAPAL	10	cg10273420	10	43953760	-7.9212969641125035	3.0155173157621113e-15
ENSG00000196793	ZNF239	10	cg11588903	19	17208493	7.017188368276276	2.6436887638236385e-12
ENSG00000196793	ZNF239	10	cg14024889	19	17633905	8.00231721017977	1.5826340565229903e-15
ENSG00000198105	ZNF248	10	cg03253629	4	105416336	7.134752520298674	1.1440461775821493e-12
ENSG00000198105	ZNF248	10	cg06457011	20	39767490	15.689346952757447	6.798552716524279e-54
ENSG00000198105	ZNF248	10	cg07893801	20	39767358	9.212350416720625	5.0060708001433247e-20
ENSG00000198105	ZNF248	10	cg08097417	7	130419133	12.199615118719786	1.2138658423328677e-33
ENSG00000198105	ZNF248	10	cg11150667	3	195595368	8.047080131823618	1.105175341513077e-15
ENSG00000198105	ZNF248	10	cg12307638	2	233323532	6.892085597526832	6.3528143967441755e-12
ENSG00000198105	ZNF248	10	cg13939234	4	120375997	-6.958620856868818	3.992429204370528e-12
ENSG00000198105	ZNF248	10	cg14361627	7	130419116	12.797648417548189	8.695569517134059e-37
ENSG00000198105	ZNF248	10	cg22094845	2	233324053	6.990289216262214	3.1958228717624862e-12
ENSG00000198105	ZNF248	10	cg22199969	2	233323840	9.940281627792222	5.103093704558965e-23
ENSG00000198105	ZNF248	10	cg23238134	2	233323718	8.311313458391156	1.278578322066485e-16
ENSG00000198105	ZNF248	10	cg23533926	12	111358616	-20.676413960370756	2.343106024795496e-90
ENSG00000198105	ZNF248	10	cg26181818	2	233323935	6.905933508345601	5.769397388646227e-12
ENSG00000110455	ACCS	11	cg02914427	16	29674184	16.4833076308068	4.003097407911236e-59
ENSG00000132744	ACY3	11	cg08371976	3	8725297	9.445142103100123	5.846645744609021e-21
ENSG00000006534	ALDH3B1	11	cg06786064	7	6894869	-11.385150217192118	1.4024900170312565e-29
ENSG00000006534	ALDH3B1	11	cg15600365	17	1420230	-25.469946305009103	8.791641832912809e-133
ENSG00000149089	APIP	11	cg10523494	17	72528386	-17.002629024043234	1.1450867493633651e-62
ENSG00000152219	ARL14EP	11	cg00316759	15	71407484	-7.8477442435947395	5.384751265026145e-15
ENSG00000152219	ARL14EP	11	cg27583138	6	24774877	-7.190935396865534	7.630769028955909e-13
ENSG00000152219	ARL14EP	11	cg27649194	12	1974168	-7.5600332881249885	4.9580278088318566e-14
ENSG00000133794	ARNTL	11	cg12261786	10	88727830	-8.739853122238577	3.367120836841786e-18
ENSG00000133794	ARNTL	11	cg14209784	10	88729861	-12.777610848679537	1.1144513771093975e-36
ENSG00000133794	ARNTL	11	cg23837265	10	88730407	-9.377791500302695	1.0921913875141875e-20
ENSG00000162174	ASRGL1	11	cg25505785	19	14181410	-9.697101578976737	5.401835789807734e-22
ENSG00000184743	ATL3	11	cg02178058	12	94533951	14.574482654727317	6.375700235858274e-47
ENSG00000174684	B3GNT1	11	cg05503627	12	26267490	-8.095607566412738	7.493777393986339e-16
ENSG00000149260	CAPN5	11	cg01441593	17	79818808	-18.291389836405532	7.328839643925927e-72
ENSG00000149260	CAPN5	11	cg01450204	11	11643690	-10.413025653233822	4.489200851761971e-25
ENSG00000149548	CCDC15	11	cg03800765	3	11313984	-10.846383671117062	4.893149807068786e-27
ENSG00000149548	CCDC15	11	cg03801128	16	77224772	-13.117508633595392	1.5971150894808873e-38
ENSG00000110172	CHORDC1	11	cg03701266	5	10649678	-9.586188806729007	1.5469498934047501e-21
ENSG00000110172	CHORDC1	11	cg20884098	2	74710615	-9.41853245776864	7.47419167199757e-21
ENSG00000150316	CWC15	11	cg01640437	11	65405484	27.949925608649195	2.7927034219613295e-157
ENSG00000110367	DDX6	11	cg24590990	2	234881435	-7.6903224034088975	1.8346695156823084e-14
ENSG00000110367	DDX6	11	cg27243560	12	25522335	-11.512386707612807	3.391143330693915e-30
ENSG00000177030	DEAF1	11	cg03520265	6	138785472	12.513455362131985	2.8617292357483224e-35
ENSG00000177030	DEAF1	11	cg06270737	6	138785358	16.856739325219383	1.2015606211248095e-61
ENSG00000187726	DNAJB13	11	cg26860703	11	6255872	-7.64415554241814	2.6142675416835943e-14
ENSG00000184545	DUSP8	11	cg06471548	7	192006	7.487212012016512	8.603110646780363e-14
ENSG00000051009	FAM160A2	11	cg12483561	17	72920385	-12.17842765935307	1.566433901377531e-33
ENSG00000158483	FAM86C1	11	cg16837680	8	8084974	-8.844336500145005	1.3529313242701592e-18
ENSG00000158483	FAM86C1	11	cg22076228	3	129831635	-24.696055639226145	1.6877092973802628e-125
ENSG00000149781	FERMT3	11	cg06690735	6	30294946	13.791022618183968	2.6494553780394083e-42
ENSG00000149262	INTS4	11	cg15584221	1	210546902	11.951121453069618	2.246184067167372e-32
ENSG00000182359	KBTBD3	11	cg01420011	5	175161230	18.18073825288921	4.695036540460936e-71
ENSG00000130592	LSP1	11	cg14652902	5	123571732	7.456033686086912	1.0860905832384328e-13
ENSG00000120458	MSANTD2	11	cg08409562	6	31737885	7.702017504552381	1.675125749167034e-14
ENSG00000120458	MSANTD2	11	cg12460175	22	18268062	6.883541653106524	6.743615654535531e-12
ENSG00000120458	MSANTD2	11	cg14086922	22	18268239	7.250201194850771	4.965228391474941e-13
ENSG00000120458	MSANTD2	11	cg15501231	6	31737630	8.441531235260921	4.315174810352628e-17
ENSG00000120458	MSANTD2	11	cg21463605	22	18268249	7.315246878570064	3.0845442487280477e-13
ENSG00000110583	NAA40	11	cg02178058	12	94533951	-45.18610285987442	0
ENSG00000151503	NCAPD3	11	cg18924493	11	506924	-7.560621425186879	4.937984601328579e-14
ENSG00000151503	NCAPD3	11	cg18971873	11	72525173	-7.632769010140164	2.8506653737184615e-14
ENSG00000021762	OSBPL5	11	cg16206836	20	36157266	16.7455521543965	6.752476599563112e-61
ENSG00000175115	PACS1	11	cg14189678	7	157690657	11.882174827459039	5.050477132320139e-32
ENSG00000175115	PACS1	11	cg26701943	11	108369231	-21.26405570095177	3.864680542050732e-95
ENSG00000177225	PDDC1	11	cg06097659	1	1141991	-9.889324738009119	8.443493382421811e-23
ENSG00000177225	PDDC1	11	cg21196724	5	178950855	23.740552988173715	1.1484447838776787e-116
ENSG00000110435	PDHX	11	cg10523494	17	72528386	21.59641810545747	5.7039381289830445e-98
ENSG00000073921	PICALM	11	cg24857958	1	80517010	11.271053331753471	4.9354904407767434e-29
ENSG00000176485	PLA2G16	11	cg02178058	12	94533951	12.215455770139778	1.0182407795952186e-33
ENSG00000166689	PLEKHA7	11	cg25961221	20	3775979	-8.813153585972827	1.7769374099927737e-18
ENSG00000137713	PPP2R1B	11	cg18187862	3	45730750	7.062328362973174	1.919984731230719e-12
ENSG00000167994	RAB3IL1	11	cg19683457	6	105307726	7.495965109224107	8.057405404895194e-14
ENSG00000048649	RSF1	11	cg13837552	12	112819996	7.925165635083798	2.925753034317568e-15
ENSG00000185187	SIGIRR	11	cg07325233	21	34638662	15.008291209312365	1.4146737388969856e-49
ENSG00000185187	SIGIRR	11	cg07554231	19	50083850	19.27427284801898	3.116869802837912e-79
ENSG00000185187	SIGIRR	11	cg10151737	6	170615854	35.685536935274364	2.140824594148848e-242
ENSG00000185187	SIGIRR	11	cg13139020	6	3000058	6.964853508468498	3.826471243075133e-12
ENSG00000185187	SIGIRR	11	cg14116222	17	79935202	17.341658914825185	5.147119012392321e-65
ENSG00000185187	SIGIRR	11	cg14414971	7	3340979	-7.775666185592149	9.479865344430609e-15
ENSG00000185187	SIGIRR	11	cg22741272	7	6460966	9.507014399659194	3.2806035059810746e-21
ENSG00000185187	SIGIRR	11	cg23062006	11	46940220	7.417917263616593	1.44484709389526e-13
ENSG00000130598	TNNI2	11	cg01710146	12	117348848	10.086873300787909	1.204099218766913e-23
ENSG00000110057	UNC93B1	11	cg08196758	22	25796782	-10.348650525975463	8.672832851927993e-25
ENSG00000160695	VPS11	11	cg07369507	6	28304287	10.381243150172077	6.225794802997998e-25
ENSG00000019102	VSIG2	11	cg15123187	1	20569715	-6.864482861392475	7.696150910138741e-12
ENSG00000166261	ZNF202	11	cg00514665	16	7703812	-7.2586628316172055	4.66730498894618e-13
ENSG00000166261	ZNF202	11	cg01050225	16	7703947	-7.16149877427963	9.44087165691266e-13
ENSG00000166261	ZNF202	11	cg02278912	14	45267997	-8.74495381217343	3.2225944630488543e-18
ENSG00000166261	ZNF202	11	cg03248761	13	81228965	-8.412974851974765	5.4824241303911565e-17
ENSG00000166261	ZNF202	11	cg03600259	6	164052180	-7.545819296513474	5.5240985860124e-14
ENSG00000166261	ZNF202	11	cg03689146	7	52341810	-7.321992608980408	2.9347555829233886e-13
ENSG00000166261	ZNF202	11	cg03986562	16	7703893	-7.378315337663164	1.9363796714650928e-13
ENSG00000166261	ZNF202	11	cg04008252	4	72897782	-7.593328836842385	3.8518343045659135e-14
ENSG00000166261	ZNF202	11	cg04391048	2	18766022	-7.555253538844528	5.14326835073549e-14
ENSG00000166261	ZNF202	11	cg05681560	6	164288814	-7.1157213661370635	1.3116307886862438e-12
ENSG00000166261	ZNF202	11	cg06385380	7	48887585	-7.298356246776611	3.49114024163435e-13
ENSG00000166261	ZNF202	11	cg06955417	7	16890879	-8.316771304802836	1.2225668178518027e-16
ENSG00000166261	ZNF202	11	cg14662585	7	16890769	-8.120304551492385	6.12174658141142e-16
ENSG00000166261	ZNF202	11	cg15078822	7	52341469	-7.0209720373113464	2.574203446171641e-12
ENSG00000166261	ZNF202	11	cg15750303	2	18765848	-7.819905559191234	6.7013317087065924e-15
ENSG00000166261	ZNF202	11	cg15867728	4	72898212	-7.566264841591625	4.731350223134e-14
ENSG00000166261	ZNF202	11	cg16004501	18	54814303	-7.553750806534524	5.202151513819947e-14
ENSG00000166261	ZNF202	11	cg16324992	7	16890431	-7.310098322423364	3.202882491049942e-13
ENSG00000166261	ZNF202	11	cg16877087	2	161504834	-7.146098184753943	1.0547491378678244e-12
ENSG00000166261	ZNF202	11	cg16919449	10	36054185	-8.329253458437579	1.1022853183657773e-16
ENSG00000166261	ZNF202	11	cg20152309	10	36054255	-8.738861568437073	3.3977723079765967e-18
ENSG00000166261	ZNF202	11	cg20289913	4	72897868	-8.052806668927937	1.0558500252369351e-15
ENSG00000166261	ZNF202	11	cg20581874	14	21191754	-9.46406882999056	4.890546821552138e-21
ENSG00000166261	ZNF202	11	cg20702390	2	18766018	-6.789084905053007	1.2934624757077477e-11
ENSG00000166261	ZNF202	11	cg21266330	4	72897698	-8.119586953598576	6.157463582631987e-16
ENSG00000166261	ZNF202	11	cg21482472	13	81229358	-8.28123961286567	1.6404451100215144e-16
ENSG00000166261	ZNF202	11	cg21540359	7	52341648	-8.02776805637519	1.2910553406965989e-15
ENSG00000166261	ZNF202	11	cg23513591	13	81229232	-8.233354826672151	2.433499426333401e-16
ENSG00000166261	ZNF202	11	cg23616527	17	50961649	-8.471410829630756	3.354071039330214e-17
ENSG00000166261	ZNF202	11	cg24536250	5	50218625	-9.016613636126547	2.9366674127186834e-19
ENSG00000166261	ZNF202	11	cg26012061	7	16890775	-7.912570694928213	3.232181141740574e-15
ENSG00000166261	ZNF202	11	cg26393629	14	21191859	-10.234343480000136	2.751712065733592e-24
ENSG00000166261	ZNF202	11	cg26512406	16	28223152	-8.758591840196818	2.8621284447376642e-18
ENSG00000166261	ZNF202	11	cg26617364	7	52342124	-7.248105014942625	5.040779493964019e-13
ENSG00000166261	ZNF202	11	cg26656113	4	72897613	-8.424053272420062	4.995998233357938e-17
ENSG00000166261	ZNF202	11	cg27241808	6	114180814	-7.600423536738598	3.649251983517087e-14
ENSG00000166261	ZNF202	11	cg27289227	13	90536270	-8.654398861480717	7.052753402247839e-18
ENSG00000081760	AACS	12	cg26973714	12	104609524	-12.429951704056364	7.750498032067237e-35
ENSG00000135503	ACVR1B	12	cg01727431	1	871057	-7.957131536554004	2.2711255176251854e-15
ENSG00000135503	ACVR1B	12	cg02439789	1	871441	-10.733665823067966	1.6129362044178934e-26
ENSG00000135503	ACVR1B	12	cg05527507	1	861265	-8.26014811526942	1.9535692112405056e-16
ENSG00000135503	ACVR1B	12	cg06531475	1	870791	-8.851367617905161	1.2724755486335252e-18
ENSG00000135503	ACVR1B	12	cg06624358	1	870810	-8.012561942398943	1.4592942461970092e-15
ENSG00000135503	ACVR1B	12	cg10146935	1	871308	-10.612226421785564	5.750696376297152e-26
ENSG00000135503	ACVR1B	12	cg12634245	6	10495364	-8.267582066357114	1.8374732288902325e-16
ENSG00000135503	ACVR1B	12	cg20139336	6	10495435	-8.331546683008776	1.0823021963296387e-16
ENSG00000135503	ACVR1B	12	cg23664396	1	23895366	-8.81346295424928	1.7744411038359475e-18
ENSG00000135503	ACVR1B	12	cg24362661	1	871546	-10.823801002910317	6.223955315288805e-27
ENSG00000135503	ACVR1B	12	cg24997886	1	871033	-8.194371643456384	3.3517983266806256e-16
ENSG00000135503	ACVR1B	12	cg25602536	2	8816608	-8.860928446805065	1.1698551095125411e-18
ENSG00000139567	ACVRL1	12	cg13577407	3	57994372	8.407234645607048	5.75700779331201e-17
ENSG00000176915	ANKLE2	12	cg07570055	2	233387088	-10.132576332540584	7.640024345701093e-24
ENSG00000176915	ANKLE2	12	cg16072664	21	35014885	-7.954571632388527	2.31754435544629e-15
ENSG00000176915	ANKLE2	12	cg26860994	7	127292223	-7.502226681649798	7.679002273856415e-14
ENSG00000123395	C12orf44	12	cg14316668	21	44375471	15.842856780551534	6.998886768427024e-55
ENSG00000120860	CCDC53	12	cg01777103	8	145550585	-10.896230218018099	2.8716872589063995e-27
ENSG00000111276	CDKN1B	12	cg18041893	7	104869189	11.67740225058448	5.227274726942452e-31
ENSG00000150048	CLEC1A	12	cg09212610	15	90892496	-8.870208968346699	1.077974301073339e-18
ENSG00000135678	CPM	12	cg00367515	8	57230584	19.275180300141766	2.907345764618219e-79
ENSG00000013573	DDX11	12	cg02734259	12	9559402	10.315637503345945	1.209877507404777e-24
ENSG00000013573	DDX11	12	cg05840127	12	3181055	12.22917000574545	8.564533699238178e-34
ENSG00000013573	DDX11	12	cg06692784	12	9600756	-9.907882069501651	7.011681371669322e-23
ENSG00000013573	DDX11	12	cg07721440	12	9601161	-18.311386890628505	5.189746666637569e-72
ENSG00000013573	DDX11	12	cg15883249	12	13028664	9.934560372685956	5.401268778509337e-23
ENSG00000013573	DDX11	12	cg16269447	12	9600801	9.467867267976178	4.71912597001952e-21
ENSG00000112787	FBRSL1	12	cg04991071	3	71615924	-22.199466991241746	4.3090112080318214e-103
ENSG00000161791	FMNL3	12	cg08965685	12	656757	-8.223605685885875	2.6390670190003887e-16
ENSG00000111711	GOLT1B	12	cg21564445	7	105220714	-7.776184547601013	9.424380992542492e-15
ENSG00000127311	HELB	12	cg14585797	9	99262208	-7.493152990070642	8.216500345195837e-14
ENSG00000198353	HOXC4	12	cg22454564	20	29549396	-7.673919274523513	2.0813783161881827e-14
ENSG00000123411	IKZF4	12	cg12139329	15	63481838	-11.696941732697661	4.204702214719176e-31
ENSG00000120645	IQSEC3	12	cg11857025	1	109633344	-20.970976918723878	9.215455646096981e-93
ENSG00000120645	IQSEC3	12	cg13149600	21	43374220	15.105665696287925	3.434736890272142e-50
ENSG00000120645	IQSEC3	12	cg24316515	8	63160853	-11.76858422278214	1.8445703649470025e-31
ENSG00000135643	KCNMB4	12	cg02447287	2	238707023	7.969311981320018	2.059335140778594e-15
ENSG00000111796	KLRB1	12	cg06871772	16	67313024	13.977284609217394	2.1919877013947306e-43
ENSG00000111796	KLRB1	12	cg10647445	4	138974368	11.638288537669705	8.17383864779933e-31
ENSG00000111796	KLRB1	12	cg12604368	6	426166	15.704248112253453	5.530237683029049e-54
ENSG00000111796	KLRB1	12	cg13894827	9	6013624	28.382955467413524	1.1283820118296659e-161
ENSG00000111796	KLRB1	12	cg15370862	12	31270326	-10.628630758654717	4.848035141902044e-26
ENSG00000111796	KLRB1	12	cg18906795	9	6015507	-36.82181461443738	5.1472464173968104e-256
ENSG00000111796	KLRB1	12	cg25187463	12	31226441	-6.899143158447437	6.052280607594297e-12
ENSG00000134539	KLRD1	12	cg09212610	15	90892496	16.615119074556123	5.19844527164441e-60
ENSG00000226091	LINC00937	12	cg19844110	4	9533426	7.615836315989781	3.245441109362778e-14
ENSG00000003056	M6PR	12	cg02879784	3	128880367	-8.419293295746654	5.2019749829452236e-17
ENSG00000166987	MBD6	12	cg11155082	12	109915172	9.436231983297647	6.356189857886741e-21
ENSG00000139160	METTL20	12	cg11582223	11	308126	-10.376028665185904	6.548537657608514e-25
ENSG00000175727	MLXIP	12	cg16834708	12	25403986	-6.899560698272413	6.036032266978129e-12
ENSG00000198598	MMP17	12	cg26663686	8	144241809	19.638857967856353	4.4814517584476916e-82
ENSG00000198015	MRPL42	12	cg00223950	1	19536222	-16.002228437733496	6.295284560291116e-56
ENSG00000187109	NAP1L1	12	cg07613588	20	32229383	-10.931078333301171	1.979123491301836e-27
ENSG00000136045	PWP1	12	cg25346576	17	28443852	-11.082044904474538	3.8984393051912066e-28
ENSG00000002016	RAD52	12	cg26280097	6	33177714	9.837559873237643	1.391322594506173e-22
ENSG00000004700	RECQL	12	cg04279164	11	106698694	-9.3526891905709	1.3784436089622335e-20
ENSG00000166532	RIMKLB	12	cg15902621	4	159579631	8.834678086821913	1.4729344537873474e-18
ENSG00000139405	RITA1	12	cg10074413	8	52320799	-10.968480202678009	1.3273731045877695e-27
ENSG00000139405	RITA1	12	cg13266630	7	94285327	-8.210953664624393	2.925201101969923e-16
ENSG00000256576	RP13-977J11.2	12	cg04063589	5	134871973	-15.042414176239781	8.553727304491214e-50
ENSG00000061936	SFSWAP	12	cg11456303	2	131509767	-14.404902827338516	6.556512520417419e-46
ENSG00000061936	SFSWAP	12	cg12214695	10	43048337	7.15630349237251	9.80201770651385e-13
ENSG00000139370	SLC15A4	12	cg03118206	6	138482933	-10.000800347425745	2.814658422200191e-23
ENSG00000139372	TDG	12	cg13813533	9	114290738	13.178986180428998	7.302540553451289e-39
ENSG00000111669	TPI1	12	cg12902497	1	8938815	7.133036392107154	1.159937149664894e-12
ENSG00000111647	UHRF1BP1L	12	cg08398034	16	66412919	-7.452007170934235	1.1183816199355788e-13
ENSG00000060237	WNK1	12	cg26280097	6	33177714	9.777085157924766	2.4974543692574447e-22
ENSG00000256223	ZNF10	12	cg27325820	5	166582608	7.02962484745938	2.421420688560831e-12
ENSG00000090612	ZNF268	12	cg11207515	7	146904205	9.634160783013261	9.822684644916826e-22
ENSG00000090612	ZNF268	12	cg11820154	8	29732714	11.249810844097727	6.240874987396853e-29
ENSG00000090612	ZNF268	12	cg15448366	1	223303049	6.837569550266977	9.268357534842923e-12
ENSG00000090612	ZNF268	12	cg26668744	7	159127977	-7.035151705323292	2.3284700207449176e-12
ENSG00000088448	ANKRD10	13	cg05225581	13	41706923	14.153407546420848	2.025493985067456e-44
ENSG00000088448	ANKRD10	13	cg18241387	7	84494975	-7.175256605631624	8.547814031885409e-13
ENSG00000102606	ARHGEF7	13	cg02959866	2	26364971	14.690620705387511	1.2347760904966384e-47
ENSG00000068650	ATP11A	13	cg02309882	5	85940883	27.261079472551756	2.51130354579095e-150
ENSG00000123191	ATP7B	13	cg18335740	13	41363409	7.7724477326759915	9.705788738618357e-15
ENSG00000150401	DCUN1D2	13	cg00026974	17	42298151	7.973342322426778	1.9955106266007552e-15
ENSG00000150401	DCUN1D2	13	cg06185924	10	27529785	-9.578957666616155	1.6595689793738306e-21
ENSG00000150401	DCUN1D2	13	cg07318453	4	74124502	-14.029871907740976	1.0786570265833933e-43
ENSG00000150401	DCUN1D2	13	cg07368265	1	219375142	17.87803887297728	7.550096300616446e-69
ENSG00000150401	DCUN1D2	13	cg09065654	3	183948302	9.736959541675525	3.676951716230001e-22
ENSG00000150401	DCUN1D2	13	cg12904880	6	30139832	-8.153981527642047	4.658213253034395e-16
ENSG00000183087	GAS6	13	cg01286935	16	89778247	8.663032622551546	6.549708002946056e-18
ENSG00000183087	GAS6	13	cg06683021	4	9475346	-18.80397643221974	1.1244109961627112e-75
ENSG00000183087	GAS6	13	cg09065654	3	183948302	7.9661300139522115	2.1133801053582667e-15
ENSG00000183087	GAS6	13	cg11088422	17	42392697	9.60571559100854	1.287657775660219e-21
ENSG00000183087	GAS6	13	cg14441964	10	75910358	7.053824790254517	2.0398291054242115e-12
ENSG00000183087	GAS6	13	cg19204194	4	110736315	10.292880415056018	1.5249442172596576e-24
ENSG00000183087	GAS6	13	cg23097155	12	133066069	7.410662677313016	1.5232573677817557e-13
ENSG00000188342	GTF2F2	13	cg10316527	15	82242305	-9.133877332951212	1.0216218495547903e-19
ENSG00000102445	KIAA0226L	13	cg08475853	4	9492758	-15.274109063330556	3.0106090498583873e-51
ENSG00000102445	KIAA0226L	13	cg20897026	13	64416816	24.15668486023518	1.5758908121736433e-120
ENSG00000102554	KLF5	13	cg01765653	6	29599160	8.164531407529642	4.271476685981642e-16
ENSG00000102554	KLF5	13	cg03127104	6	29599250	8.793193024883927	2.1154778162743976e-18
ENSG00000102554	KLF5	13	cg04109092	7	2647852	6.870719244804056	7.368195050963158e-12
ENSG00000102554	KLF5	13	cg04654167	6	158090949	8.62614456101116	8.986452466907299e-18
ENSG00000102554	KLF5	13	cg04890576	17	73032613	7.2251105074226345	5.957178058136638e-13
ENSG00000102554	KLF5	13	cg05234415	19	38743744	8.434471631462952	4.5753766316635405e-17
ENSG00000102554	KLF5	13	cg06519422	6	29599226	8.731377144259746	3.62395244671893e-18
ENSG00000102554	KLF5	13	cg08305533	22	32007224	7.934804807714592	2.7091492183367424e-15
ENSG00000102554	KLF5	13	cg08360599	3	141087261	7.272143483020709	4.228620608176925e-13
ENSG00000102554	KLF5	13	cg11276093	10	95123774	6.784355536146555	1.3357828896766522e-11
ENSG00000102554	KLF5	13	cg12467226	3	13694484	7.204301604211367	6.927929930217946e-13
ENSG00000102554	KLF5	13	cg12991385	6	29599259	8.17741856478053	3.8453532209332074e-16
ENSG00000102554	KLF5	13	cg13620499	9	136353126	7.169310543850132	8.921744715648934e-13
ENSG00000102554	KLF5	13	cg13790576	9	139640661	6.965275122981308	3.8103250742601536e-12
ENSG00000102554	KLF5	13	cg16313758	7	2647039	6.942471834376636	4.470610030484156e-12
ENSG00000102554	KLF5	13	cg17806418	6	29599319	8.40969483100363	5.632592707673369e-17
ENSG00000102554	KLF5	13	cg18503234	11	68847839	7.16276311547926	9.352939506761218e-13
ENSG00000102554	KLF5	13	cg20139800	6	29599178	8.215676474046962	2.812171154983497e-16
ENSG00000102554	KLF5	13	cg20588285	21	45707344	7.327585640962757	2.815658878465651e-13
ENSG00000102554	KLF5	13	cg21370924	3	141087313	7.073370134634692	1.7744134259098634e-12
ENSG00000102554	KLF5	13	cg21644740	6	29599248	8.863968392515456	1.1372408487783179e-18
ENSG00000102554	KLF5	13	cg22573359	17	8645026	7.808236675630185	7.339018098285957e-15
ENSG00000102554	KLF5	13	cg22679406	6	29599331	8.824332209777129	1.6108721107659355e-18
ENSG00000102554	KLF5	13	cg23068772	7	30737061	7.2767839417002715	4.08756081701511e-13
ENSG00000102554	KLF5	13	cg23469878	9	139640884	7.319569622413643	2.986717240660509e-13
ENSG00000102554	KLF5	13	cg24709951	17	73033009	8.10353019040059	7.009791000675861e-16
ENSG00000102554	KLF5	13	cg27172175	17	41495032	7.363383053965127	2.16208589667982e-13
ENSG00000260910	LINC00565	13	cg01286935	16	89778247	11.258075069481851	5.70151788110836e-29
ENSG00000260910	LINC00565	13	cg01594514	11	67374213	-10.082471483835823	1.2569121864470365e-23
ENSG00000260910	LINC00565	13	cg05128566	7	95401838	11.703485023310343	3.8861227871758967e-31
ENSG00000260910	LINC00565	13	cg05744487	11	18720220	-11.49530538925333	4.0902225776354326e-30
ENSG00000260910	LINC00565	13	cg11088422	17	42392697	9.235286524791306	4.063660931766341e-20
ENSG00000260910	LINC00565	13	cg12642006	16	11350118	-10.542704014746409	1.1819431904398169e-25
ENSG00000260910	LINC00565	13	cg20197516	17	80373348	10.08772478117157	1.1930167870132576e-23
ENSG00000260910	LINC00565	13	cg23325670	19	17337031	-15.803896509603986	1.2443474469407759e-54
ENSG00000260910	LINC00565	13	cg26829322	1	11713867	-10.084210016847141	1.2353998959668041e-23
ENSG00000122033	MTIF3	13	cg05079548	7	128337621	10.581044635434758	7.938111250349916e-26
ENSG00000122033	MTIF3	13	cg12437277	1	228743235	12.168901918254777	1.749099181401399e-33
ENSG00000122033	MTIF3	13	cg13248778	7	128337725	-12.161450422468693	1.910033492133413e-33
ENSG00000122033	MTIF3	13	cg17477090	1	228743373	12.712471495987714	2.4923149779744766e-36
ENSG00000122033	MTIF3	13	cg17964975	7	128337483	16.227114634155516	2.0683071380123524e-57
ENSG00000122033	MTIF3	13	cg22700015	1	228743131	10.020475074487754	2.321000586998495e-23
ENSG00000120662	MTRF1	13	cg09899636	12	8599671	-11.937380831412815	2.6324782806565144e-32
ENSG00000136098	NEK3	13	cg18335740	13	41363409	-12.863526958941739	3.85375319730806e-37
ENSG00000102699	PARP4	13	cg10328297	13	41366576	10.186910091433376	4.429490829745201e-24
ENSG00000121390	PSPC1	13	cg02624129	11	130786230	8.480553316841778	3.104489786109428e-17
ENSG00000133104	SPG20	13	cg14361741	9	71685390	7.046995303146683	2.1403346533547375e-12
ENSG00000165416	SUGT1	13	cg18335740	13	41363409	-47.368728576902406	0
ENSG00000136100	VPS36	13	cg18335740	13	41363409	-8.360681225550563	8.488509180299793e-17
ENSG00000185100	ADSSL1	14	cg18809122	2	191513153	8.167011158453771	4.1915201155385527e-16
ENSG00000198513	ATL1	14	cg26929161	20	50701266	7.400557693159213	1.6425702070211903e-13
ENSG00000140104	C14orf79	14	cg02143877	20	52790141	11.004736926728409	8.999993901212986e-28
ENSG00000140104	C14orf79	14	cg10962261	2	217277064	18.086904210742162	2.3266509085564932e-70
ENSG00000198752	CDC42BPB	14	cg10064079	20	44600917	8.468814327316073	3.43189701972955e-17
ENSG00000100490	CDKL1	14	cg23101093	5	42941518	-8.485916300535957	2.9698489753976287e-17
ENSG00000099814	CEP170B	14	cg02143877	20	52790141	20.650264002996263	3.987302888451087e-90
ENSG00000187630	DHRS4L2	14	cg23972409	3	160282398	-7.408059116816618	1.5551914924275585e-13
ENSG00000119686	FLVCR2	14	cg03967192	2	10861604	-9.529148368913892	2.656807631390078e-21
ENSG00000215271	HOMEZ	14	cg12545949	6	71571446	6.816571618785253	1.0722491684977277e-11
ENSG00000215271	HOMEZ	14	cg18912768	2	169887819	7.346014861384974	2.4624711116415217e-13
ENSG00000258701	LINC00638	14	cg03619075	16	858499	-7.170011811863115	8.88338957016903e-13
ENSG00000258701	LINC00638	14	cg10071602	16	2028740	-7.906695414100664	3.3884062621428066e-15
ENSG00000258701	LINC00638	14	cg26395761	7	107700124	-24.21920667536295	4.5461016975589025e-121
ENSG00000214548	MEG3	14	cg00642460	5	176827697	6.8880696705534845	6.533494626528079e-12
ENSG00000214548	MEG3	14	cg01142302	3	9988590	7.883498254328945	4.0660280342750004e-15
ENSG00000214548	MEG3	14	cg02725398	3	9988144	9.224445292865493	4.48457167458649e-20
ENSG00000214548	MEG3	14	cg05783384	2	218843735	8.429789393243281	4.7603895669489765e-17
ENSG00000214548	MEG3	14	cg07616871	2	218843504	7.450004731793152	1.1355822041054811e-13
ENSG00000214548	MEG3	14	cg07865091	1	43814306	8.17819505672275	3.8221203234059387e-16
ENSG00000214548	MEG3	14	cg08706567	1	43814983	9.31188376737581	2.009987068959162e-20
ENSG00000214548	MEG3	14	cg11839415	1	43814764	9.038230224355658	2.4193663282523163e-19
ENSG00000214548	MEG3	14	cg13393721	1	43815035	9.32028100885157	1.8602018405719898e-20
ENSG00000214548	MEG3	14	cg19337279	1	43804317	-7.054265349080849	2.03297986153691e-12
ENSG00000214548	MEG3	14	cg20225999	2	218843435	7.854327057384237	5.115522533695389e-15
ENSG00000214548	MEG3	14	cg21279996	1	43815465	7.329846752468493	2.7696745583042927e-13
ENSG00000080823	MOK	14	cg22912732	8	48910636	-8.336021651383751	1.0421825598905128e-16
ENSG00000169413	RNASE6	14	cg26512406	16	28223152	10.104480553513957	1.0115627049900222e-23
ENSG00000092108	SCFD1	14	cg11248957	10	15963599	-10.574005923325887	8.536697356632526e-26
ENSG00000042317	SPATA7	14	cg18511212	10	38715824	-13.694553504998852	9.273813157235972e-42
ENSG00000156414	TDRD9	14	cg04914231	16	30006637	-7.1674917656187205	9.047049874101293e-13
ENSG00000165548	TMEM63C	14	cg07769176	16	88878414	-9.334890520839938	1.6271681991188107e-20
ENSG00000104043	ATP8B4	15	cg05119988	4	166251189	-6.869504235870487	7.431793148272792e-12
ENSG00000104043	ATP8B4	15	cg09491962	10	98900771	-6.84571346997065	8.761161257631928e-12
ENSG00000104043	ATP8B4	15	cg14660676	8	126012434	-6.786035530793498	1.3207232349046471e-11
ENSG00000104043	ATP8B4	15	cg16000331	22	42230138	-7.203467709381209	6.971382476868274e-13
ENSG00000104043	ATP8B4	15	cg17901584	1	55353706	-6.8814729385389235	6.83992546161035e-12
ENSG00000104043	ATP8B4	15	cg19268652	6	12119552	-7.799406386873347	7.865284717920693e-15
ENSG00000104043	ATP8B4	15	cg19751789	19	11199944	-8.85097147884759	1.2755849285416005e-18
ENSG00000128891	C15orf57	15	cg01027929	7	26241406	-41.72589906525249	2.0326851e-316
ENSG00000128891	C15orf57	15	cg13881513	18	2652797	11.354730582780503	1.9662641658037613e-29
ENSG00000128891	C15orf57	15	cg14565914	7	26252611	-22.14810282946048	1.210500355156787e-102
ENSG00000187446	CHP1	15	cg06757784	15	66994613	-6.8503513302638	8.49025799995383e-12
ENSG00000259363	CTD-2054N24.2	15	cg26826117	15	85116902	7.215388185954623	6.394760813837707e-13
ENSG00000035664	DAPK2	15	cg11875268	12	54576025	12.956442538288849	1.2137223819392398e-37
ENSG00000128829	EIF2AK4	15	cg01299945	6	43966762	9.822031880561692	1.618559620084458e-22
ENSG00000128829	EIF2AK4	15	cg08335892	12	95774442	9.066649436778183	1.8764897494123713e-19
ENSG00000128829	EIF2AK4	15	cg22705835	10	65332833	-27.499071143769655	1.0842434675920234e-152
ENSG00000185442	FAM174B	15	cg04533189	17	64298763	-7.2688636626737635	4.331003928036963e-13
ENSG00000185442	FAM174B	15	cg17468987	17	46688448	-23.288686371117812	1.1417559630863596e-112
ENSG00000185442	FAM174B	15	cg17522935	19	40906607	-10.117049533744513	8.897571720561553e-24
ENSG00000182511	FES	15	cg05270106	3	127997992	-9.00621082827329	3.226137351644006e-19
ENSG00000182511	FES	15	cg06853376	5	125937059	10.68165902924016	2.7846511895637053e-26
ENSG00000140564	FURIN	15	cg22843129	8	669177	15.117437679393841	2.924626394163642e-50
ENSG00000175265	GOLGA8A	15	cg05269678	7	5643158	15.45158632214663	2.277183130544777e-52
ENSG00000175265	GOLGA8A	15	cg06969129	7	5645984	9.75718985833721	3.0245673930079384e-22
ENSG00000140307	GTF2A2	15	cg19119119	12	49760396	6.789279552794198	1.2916950264026894e-11
ENSG00000140545	MFGE8	15	cg14182819	20	48628662	-8.26169315923048	1.9281606041684975e-16
ENSG00000069869	NEDD4	15	cg06723301	22	21213449	-9.402877665328331	8.652127171386582e-21
ENSG00000166821	PEX11A	15	cg13314081	15	56342834	-7.465599632642127	1.010978299201274e-13
ENSG00000166821	PEX11A	15	cg23841819	1	204970383	-25.17561475973441	5.351860763284119e-130
ENSG00000243708	PLA2G4B	15	cg01560972	11	8190837	7.103953765998693	1.4274895966782735e-12
ENSG00000243708	PLA2G4B	15	cg01601299	3	128745637	8.392183481692197	6.530298843576549e-17
ENSG00000243708	PLA2G4B	15	cg09243021	7	142985019	7.003548446788583	2.9125440049751133e-12
ENSG00000243708	PLA2G4B	15	cg10504436	22	24180492	8.068846150807401	9.28608436801973e-16
ENSG00000243708	PLA2G4B	15	cg13176979	6	79944654	6.889845487348935	6.456385766309202e-12
ENSG00000243708	PLA2G4B	15	cg16190211	19	10590009	7.405222793346199	1.5866714502451143e-13
ENSG00000243708	PLA2G4B	15	cg19542048	19	10590162	8.378649227649884	7.312128936955413e-17
ENSG00000243708	PLA2G4B	15	cg20595215	3	8543014	7.815448250263451	6.943578019862603e-15
ENSG00000137841	PLCB2	15	cg17533455	5	130599827	15.558156724843233	4.794008578705529e-53
ENSG00000041357	PSMA4	15	cg26414235	15	34877407	7.030595246224845	2.4046558928969028e-12
ENSG00000248508	SRP14-AS1	15	cg22705835	10	65332833	16.873188158948974	9.032575291069037e-62
ENSG00000180953	ST20	15	cg22388260	16	14403138	11.805253299409133	1.211029309073322e-31
ENSG00000185418	TARSL2	15	cg22865050	19	11457020	13.466232221133643	1.8294445862707174e-40
ENSG00000167202	TBC1D2B	15	cg13745513	9	131018379	-18.53169640839052	1.2234040376907429e-73
ENSG00000129003	VPS13C	15	cg03019505	22	26898513	7.34860662210843	2.411269297267348e-13
ENSG00000162066	AMDHD2	16	cg13063040	8	145669623	-10.261206228071735	2.115042202711075e-24
ENSG00000167522	ANKRD11	16	cg06774039	2	74056087	14.666341179917334	1.768824846339842e-47
ENSG00000167522	ANKRD11	16	cg18515585	11	9113190	16.291362397737853	7.929463340931124e-58
ENSG00000103326	CAPN15	16	cg01804343	7	73134065	-9.057236619131686	2.047886669826043e-19
ENSG00000103326	CAPN15	16	cg07702548	16	88636912	6.973756674042912	3.5955227197192414e-12
ENSG00000129993	CBFA2T3	16	cg04377525	19	2977344	10.853148793573542	4.5699750763070475e-27
ENSG00000129993	CBFA2T3	16	cg08993172	11	44327267	-6.9925744671368255	3.1482477164896467e-12
ENSG00000135736	CCDC102A	16	cg04924309	16	75551481	8.304531172473137	1.3550668494671184e-16
ENSG00000162063	CCNF	16	cg20834643	3	50122624	-7.847232615895015	5.424512610995888e-15
ENSG00000131165	CHMP1A	16	cg03958163	10	105615502	7.37384807578422	2.0035781057879757e-13
ENSG00000131165	CHMP1A	16	cg13698153	12	118541722	7.848877738854928	5.34686206920076e-15
ENSG00000103196	CRISPLD2	16	cg00252594	14	102974737	13.884091864566116	7.59404700292418e-43
ENSG00000103196	CRISPLD2	16	cg15951107	19	49458367	-7.300990095239018	3.4254135635830845e-13
ENSG00000174177	CTU2	16	cg08118649	12	99038419	11.881642032665258	5.049597161146798e-32
ENSG00000003249	DBNDD1	16	cg26114043	4	128544375	13.353920003402868	7.848366101725759e-40
ENSG00000167968	DNASE1L2	16	cg05456948	10	135171583	-14.662992604797703	1.8803435791233263e-47
ENSG00000167968	DNASE1L2	16	cg09818588	4	84406319	-13.59048273298763	3.7238621401798827e-41
ENSG00000167968	DNASE1L2	16	cg14409810	9	140172908	-11.302761915187084	3.5217834672671416e-29
ENSG00000167968	DNASE1L2	16	cg14859047	3	134514116	-7.9181630247429595	3.1010537222175936e-15
ENSG00000205047	FLJ00104	16	cg20228509	11	68609166	-10.218249026875988	3.2364666185605476e-24
ENSG00000059122	FLYWCH1	16	cg02910769	3	180546119	-13.119946832911616	1.569920802466139e-38
ENSG00000141013	GAS8	16	cg17268033	10	95363	19.06372479031531	1.2298539039465963e-77
ENSG00000141013	GAS8	16	cg18696576	6	34203630	-16.19479869093976	3.4253514331285264e-57
ENSG00000141013	GAS8	16	cg22237459	1	206680720	-12.911012211606096	2.1415710753500264e-37
ENSG00000141013	GAS8	16	cg26114043	4	128544375	-29.178174945634634	6.338133551791625e-170
ENSG00000006007	GDE1	16	cg16248798	1	247271246	11.958394291535527	2.0634581767763483e-32
ENSG00000166123	GPT2	16	cg05429374	16	33481620	7.724654669434583	1.4057601231992215e-14
ENSG00000230989	HSBP1	16	cg04640885	2	145273345	-18.80412990472527	1.115609832354958e-75
ENSG00000047578	KIAA0556	16	cg21317088	18	48724267	-7.652789035170975	2.4463721507446556e-14
ENSG00000104731	KLHDC4	16	cg01577292	8	143696144	-8.520162091448437	2.2217270527536628e-17
ENSG00000104731	KLHDC4	16	cg02870950	10	46168231	9.94279458700241	4.987844749200891e-23
ENSG00000104731	KLHDC4	16	cg17878506	13	76056784	-9.600076439171309	1.358778580505224e-21
ENSG00000104731	KLHDC4	16	cg18645906	4	15704599	10.665202998365814	3.3055807312827993e-26
ENSG00000104731	KLHDC4	16	cg22109262	4	17578738	22.633554124929134	7.34525421749218e-107
ENSG00000104731	KLHDC4	16	cg23890506	1	155023350	22.32027732943992	3.874731258215729e-104
ENSG00000104731	KLHDC4	16	cg25749165	10	75634242	7.930912146444594	2.7961626555757213e-15
ENSG00000246898	LINC00920	16	cg04657470	2	198365150	6.942080435770242	4.485999482399847e-12
ENSG00000087253	LPCAT2	16	cg03495059	16	30913719	12.344294274137019	2.169731162455254e-34
ENSG00000258839	MC1R	16	cg01026373	5	141071769	7.130324216695467	1.1818573567142627e-12
ENSG00000258839	MC1R	16	cg21302420	1	112162376	9.190376520807375	6.128461430172888e-20
ENSG00000258839	MC1R	16	cg24644049	4	85504048	13.487102068351819	1.405954264924267e-40
ENSG00000103313	MEFV	16	cg06952873	6	28059208	7.363785927923899	2.158853222168629e-13
ENSG00000103313	MEFV	16	cg09156207	6	28058724	7.574501729372298	4.4505958946003966e-14
ENSG00000103313	MEFV	16	cg15146567	3	42948626	6.920918716781612	5.203266148734308e-12
ENSG00000103313	MEFV	16	cg17944885	19	12225735	7.14796202098365	1.0418265482309285e-12
ENSG00000074071	MRPS34	16	cg15993354	19	12912590	-8.879810079631914	9.93015193633185e-19
ENSG00000122390	NAA60	16	cg17171325	3	10052813	-18.982585359364705	5.2751314920308604e-77
ENSG00000140853	NLRC5	16	cg00340855	6	30458586	-9.563250461532318	1.9290847741597278e-21
ENSG00000140853	NLRC5	16	cg00533183	6	32810742	-7.925893556298835	2.9121606822983283e-15
ENSG00000140853	NLRC5	16	cg01064373	6	31238245	-9.193045704993278	5.986578002048878e-20
ENSG00000140853	NLRC5	16	cg01082299	6	31431969	-15.380977146717122	6.4968129588793864e-52
ENSG00000140853	NLRC5	16	cg01309328	6	32811253	-9.148708140620972	8.956735440280386e-20
ENSG00000140853	NLRC5	16	cg01405582	6	29692365	-17.099734253449355	2.4970255436035905e-63
ENSG00000140853	NLRC5	16	cg01517384	6	31323856	-8.29645039745516	1.448781155889305e-16
ENSG00000140853	NLRC5	16	cg02188225	6	30459255	-7.546648231214525	5.495156313896241e-14
ENSG00000140853	NLRC5	16	cg05201185	6	30459139	-10.728282838058481	1.7103621583966918e-26
ENSG00000140853	NLRC5	16	cg05358170	6	29692399	-13.105495527286743	1.8705770244261188e-38
ENSG00000140853	NLRC5	16	cg07148697	6	31323253	-9.500562645149568	3.482085945886137e-21
ENSG00000140853	NLRC5	16	cg08099136	6	32811251	-7.79283113122777	8.289395129979073e-15
ENSG00000140853	NLRC5	16	cg08818207	6	32820355	-8.7456726349497	3.2083316432934805e-18
ENSG00000140853	NLRC5	16	cg10601943	6	29692824	-11.193382509990498	1.1639951344321984e-28
ENSG00000140853	NLRC5	16	cg11019014	6	30460798	-7.249704871348593	4.986702750901845e-13
ENSG00000140853	NLRC5	16	cg11187245	6	31323397	-12.50252616471637	3.2548451779950717e-35
ENSG00000140853	NLRC5	16	cg11247343	6	31237824	-7.606960890218047	3.475537843196599e-14
ENSG00000140853	NLRC5	16	cg11587584	6	29692372	-17.076100934527354	3.642998400909842e-63
ENSG00000140853	NLRC5	16	cg11594821	6	30458601	-8.422641051880593	5.063470548367696e-17
ENSG00000140853	NLRC5	16	cg11617938	6	29692281	-14.854384931678132	1.2523419246063879e-48
ENSG00000140853	NLRC5	16	cg12537337	6	26442290	-8.712392105502657	4.282285620098085e-18
ENSG00000140853	NLRC5	16	cg12588917	6	29692082	-8.8507542642531	1.2805724525814623e-18
ENSG00000140853	NLRC5	16	cg13007871	6	30458519	-9.246603634949295	3.670834258797395e-20
ENSG00000140853	NLRC5	16	cg13031097	6	31322577	-10.061100990895126	1.5578374975670012e-23
ENSG00000140853	NLRC5	16	cg13036546	6	30460576	-6.8112919730858135	1.1113857638787455e-11
ENSG00000140853	NLRC5	16	cg13040666	6	29693534	-9.171418595064486	7.288288107784112e-20
ENSG00000140853	NLRC5	16	cg14140375	6	29692582	-16.077792539962577	2.0486216624317534e-56
ENSG00000140853	NLRC5	16	cg15331332	6	29692111	-11.09803369679564	3.2897510046607592e-28
ENSG00000140853	NLRC5	16	cg15584790	6	29692475	-9.143372086012064	9.400570738140925e-20
ENSG00000140853	NLRC5	16	cg16186435	6	32810833	-9.270836812679402	2.939510752768378e-20
ENSG00000140853	NLRC5	16	cg16890093	6	32813084	-8.312291683576277	1.27070482555728e-16
ENSG00000140853	NLRC5	16	cg17608381	6	29911550	-9.50533795805185	3.329328965347139e-21
ENSG00000140853	NLRC5	16	cg21108826	6	31235956	-7.501091436629163	7.749524068055366e-14
ENSG00000140853	NLRC5	16	cg21366673	6	30459512	-8.262305449919884	1.9205497599349394e-16
ENSG00000140853	NLRC5	16	cg21684411	6	31431573	-20.09782232534631	1.1231921017702491e-85
ENSG00000140853	NLRC5	16	cg23232773	6	31431902	-17.00533779358435	1.1257793301802344e-62
ENSG00000140853	NLRC5	16	cg23235965	6	30459540	-7.902421571405797	3.5065443863567583e-15
ENSG00000140853	NLRC5	16	cg23892836	6	29692085	-9.674379449930202	6.711077098663107e-22
ENSG00000140853	NLRC5	16	cg23923934	6	31322914	-11.358887592968372	1.8805336289665003e-29
ENSG00000140853	NLRC5	16	cg24351901	6	29692092	-8.088509733071167	7.9286088136888535e-16
ENSG00000140853	NLRC5	16	cg25843003	6	31431312	-16.57428326770543	9.963252675368215e-60
ENSG00000140853	NLRC5	16	cg27486585	6	30459595	-8.534610791750826	1.9675655075031546e-17
ENSG00000140853	NLRC5	16	cg27529346	6	31322926	-9.477000060051553	4.343485196945307e-21
ENSG00000141101	NOB1	16	cg00597087	19	3557418	-9.725999279630393	4.0863111651253507e-22
ENSG00000090857	PDPR	16	cg00597087	19	3557418	6.842119362418781	8.983461252645059e-12
ENSG00000008710	PKD1	16	cg01353464	3	38180116	10.055528562028337	1.6530191993909183e-23
ENSG00000008710	PKD1	16	cg05456948	10	135171583	10.97081756856951	1.3065304415834151e-27
ENSG00000008710	PKD1	16	cg09818588	4	84406319	9.752788420052395	3.175805055399411e-22
ENSG00000008710	PKD1	16	cg13136716	2	42275153	9.32254581284816	1.831983475674071e-20
ENSG00000008710	PKD1	16	cg14409810	9	140172908	7.294596199167961	3.5961536848136556e-13
ENSG00000008710	PKD1	16	cg15256305	17	36734942	11.3811007185804	1.4794428470843184e-29
ENSG00000008710	PKD1	16	cg22475576	19	1252813	15.755973614053058	2.643373117818701e-54
ENSG00000008710	PKD1	16	cg23193446	10	15210836	7.190967627842949	7.646815826972062e-13
ENSG00000008710	PKD1	16	cg27159792	10	69524182	7.066788270255775	1.8633645645846354e-12
ENSG00000132600	PRMT7	16	cg04657470	2	198365150	-10.053862394328883	1.6731097524995488e-23
ENSG00000168411	RFWD3	16	cg01717063	16	57570057	-15.059663356540854	6.662790974561564e-50
ENSG00000158717	RNF166	16	cg08118649	12	99038419	-15.235512752901743	5.36072350386478e-51
ENSG00000261218	RP11-960L18.1	16	cg10705386	10	69644512	6.808649012914	1.1309811991377156e-11
ENSG00000140988	RPS2	16	cg05807023	4	135874116	11.165543663175427	1.5849464074873948e-28
ENSG00000140988	RPS2	16	cg08548044	11	17249958	9.594218615524648	1.4426002611230881e-21
ENSG00000198106	SNX29P2	16	cg01624645	16	88058253	33.05795192827372	4.1594746992145175e-212
ENSG00000198106	SNX29P2	16	cg02201215	14	105714846	16.94800885953099	2.819789439154966e-62
ENSG00000198106	SNX29P2	16	cg02652978	16	81944263	-10.662617433821422	3.4095925194850753e-26
ENSG00000198106	SNX29P2	16	cg03969070	1	36851558	13.636886904938835	2.0088852819553817e-41
ENSG00000198106	SNX29P2	16	cg04242021	8	121137288	-7.514321920854679	7.016753354031328e-14
ENSG00000198106	SNX29P2	16	cg06380352	16	88057687	-14.829787155121426	1.7804856726156397e-48
ENSG00000198106	SNX29P2	16	cg07370464	17	43394456	8.357608906241317	8.724491687275905e-17
ENSG00000198106	SNX29P2	16	cg08519233	3	105085521	6.801270444680939	1.1908189206280953e-11
ENSG00000198106	SNX29P2	16	cg08542520	16	88044764	9.872854882580762	9.905774232473446e-23
ENSG00000198106	SNX29P2	16	cg09292409	16	15461083	-9.286893366414493	2.5381218384862253e-20
ENSG00000198106	SNX29P2	16	cg09518670	16	88150515	-7.095955976258582	1.5123637197055687e-12
ENSG00000198106	SNX29P2	16	cg11143796	4	178363279	8.400797615353982	6.083359305573884e-17
ENSG00000198106	SNX29P2	16	cg13921324	7	99769118	8.38115031034227	7.169287686113365e-17
ENSG00000198106	SNX29P2	16	cg16383001	1	100435543	8.042519435343399	1.1488339822271613e-15
ENSG00000198106	SNX29P2	16	cg16510040	1	40042432	9.87458378301137	9.740432357758003e-23
ENSG00000198106	SNX29P2	16	cg17334114	3	133646504	-16.32821605488626	4.508110178264565e-58
ENSG00000198106	SNX29P2	16	cg25100848	1	27320937	7.838326481966488	5.8097683274530956e-15
ENSG00000198106	SNX29P2	16	cg26612794	16	88148745	-8.635328557913812	8.328069556363337e-18
ENSG00000198106	SNX29P2	16	cg26635836	16	88237832	8.744450407783217	3.2443661103674018e-18
ENSG00000005513	SOX8	16	cg03195269	13	50510427	14.253424787649529	5.371244889650036e-45
ENSG00000005513	SOX8	16	cg04116494	14	76618702	-8.420763423767392	5.155673835357191e-17
ENSG00000005513	SOX8	16	cg04118234	7	138790441	-10.174175074361427	5.07554477680324e-24
ENSG00000005513	SOX8	16	cg07968857	19	52599226	-8.763726418050107	2.7493617807399496e-18
ENSG00000158792	SPATA2L	16	cg03920392	8	28243022	11.33762503621356	2.379465076624678e-29
ENSG00000158792	SPATA2L	16	cg03958163	10	105615502	14.637201977131049	2.6468289455688416e-47
ENSG00000158792	SPATA2L	16	cg13698153	12	118541722	21.150006666028393	3.2324267770708397e-94
ENSG00000158792	SPATA2L	16	cg20159777	1	203296550	9.348285034636069	1.4396673353932605e-20
ENSG00000158792	SPATA2L	16	cg24644049	4	85504048	9.222911541898577	4.558509285889716e-20
ENSG00000197471	SPN	16	cg01722963	16	88263261	-7.061591463367609	1.9317451432466876e-12
ENSG00000197471	SPN	16	cg08542520	16	88044764	7.158255699721117	9.673238393304117e-13
ENSG00000090447	TFAP4	16	cg24044351	5	108084818	-6.8012030444939455	1.191206668289836e-11
ENSG00000184517	ZFP1	16	cg00004105	10	100022608	26.45922852668286	2.2479559824333227e-142
ENSG00000184517	ZFP1	16	cg03588812	22	19777109	7.023131088641661	2.535485751059236e-12
ENSG00000184517	ZFP1	16	cg05033389	1	15170397	7.671540235229264	2.1180592969537466e-14
ENSG00000184517	ZFP1	16	cg06786860	1	220876396	8.77938166159757	2.3885355405944255e-18
ENSG00000184517	ZFP1	16	cg08484560	13	113413587	12.486323747795646	3.9356146149275425e-35
ENSG00000184517	ZFP1	16	cg09427273	10	11077625	10.287746872423746	1.6059836743939357e-24
ENSG00000184517	ZFP1	16	cg09959150	8	709624	11.471407707421966	5.345773140164799e-30
ENSG00000184517	ZFP1	16	cg10144597	1	6191821	9.099187205932452	1.3991302405842887e-19
ENSG00000184517	ZFP1	16	cg11124260	10	79709078	7.488606979033089	8.504997309565826e-14
ENSG00000184517	ZFP1	16	cg11220732	21	46065587	9.129819940318528	1.0608567122806434e-19
ENSG00000184517	ZFP1	16	cg15144631	7	2607139	8.961818927979932	4.788817151733193e-19
ENSG00000184517	ZFP1	16	cg16069756	7	5359162	9.981344881662286	3.4145745466467e-23
ENSG00000184517	ZFP1	16	cg16694365	7	114300	10.922840058809202	2.164286735881808e-27
ENSG00000184517	ZFP1	16	cg22313078	8	99171384	8.36952071606718	7.886076256744745e-17
ENSG00000184517	ZFP1	16	cg23562160	8	709692	11.949958808079005	2.2774313254067224e-32
ENSG00000184517	ZFP1	16	cg25930786	19	54584636	11.114862604050233	2.7294852890164734e-28
ENSG00000184517	ZFP1	16	cg25937451	21	46001680	12.924560224468037	1.8025567618682565e-37
ENSG00000184517	ZFP1	16	cg26420795	21	47451611	18.56871194272599	6.4871116817073e-74
ENSG00000184939	ZFP90	16	cg00338702	12	133463694	20.744569600339933	6.926848468931979e-91
ENSG00000184939	ZFP90	16	cg00811166	5	1288569	7.137358300776525	1.1239435635399504e-12
ENSG00000184939	ZFP90	16	cg00969119	3	13325360	12.68900856014207	3.348214145801115e-36
ENSG00000184939	ZFP90	16	cg01247788	10	126281564	7.407536389182716	1.560129514755329e-13
ENSG00000184939	ZFP90	16	cg01797488	17	66194621	9.441124480604538	6.07390854209985e-21
ENSG00000184939	ZFP90	16	cg02175183	6	150309507	8.911673715985325	7.482253222187464e-19
ENSG00000184939	ZFP90	16	cg02333875	6	29618205	7.978616157119886	1.914933924959823e-15
ENSG00000184939	ZFP90	16	cg02995493	1	66311218	6.928327569423953	4.939575442621158e-12
ENSG00000184939	ZFP90	16	cg04522432	6	29618347	8.126562282593001	5.825940770266261e-16
ENSG00000184939	ZFP90	16	cg04657470	2	198365150	32.66705335041647	9.370076250575546e-208
ENSG00000184939	ZFP90	16	cg05247809	17	66194706	9.897497216691043	7.781605366818424e-23
ENSG00000184939	ZFP90	16	cg05898591	5	174805715	7.936700265871731	2.6726814659530777e-15
ENSG00000184939	ZFP90	16	cg08837884	19	4540782	19.739638930106292	7.501537539193925e-83
ENSG00000184939	ZFP90	16	cg10860553	5	1399854	10.581036848690134	7.965991143076244e-26
ENSG00000184939	ZFP90	16	cg11697861	19	15533609	9.263637910967486	3.139531257160293e-20
ENSG00000184939	ZFP90	16	cg12241733	19	743394	7.878387935607948	4.238263662786318e-15
ENSG00000184939	ZFP90	16	cg13434396	19	1508555	9.770328034650767	2.671602192696141e-22
ENSG00000184939	ZFP90	16	cg14303526	10	101609768	9.389727270900664	9.803001500093195e-21
ENSG00000184939	ZFP90	16	cg14573411	9	126135992	7.4952541913846975	8.096543586634463e-14
ENSG00000184939	ZFP90	16	cg15922174	9	126135998	8.628125930183035	8.853149445572513e-18
ENSG00000184939	ZFP90	16	cg17387870	12	133463607	20.856876310678512	8.36903587081447e-92
ENSG00000184939	ZFP90	16	cg17861836	17	79202505	8.65054177619743	7.302166885806337e-18
ENSG00000184939	ZFP90	16	cg18912107	6	134288301	11.190256810947924	1.203906406006763e-28
ENSG00000184939	ZFP90	16	cg20645729	17	66194433	11.488856464678413	4.4141986971246634e-30
ENSG00000184939	ZFP90	16	cg20689647	17	66194695	8.254313041205291	2.0509253051578956e-16
ENSG00000184939	ZFP90	16	cg20760116	3	13324924	7.461122760988422	1.0459596591013666e-13
ENSG00000184939	ZFP90	16	cg21794419	3	182973032	24.479295168652833	1.858100571997227e-123
ENSG00000184939	ZFP90	16	cg22994198	19	1508528	13.355509660638985	7.714968363123044e-40
ENSG00000184939	ZFP90	16	cg24261529	17	66194137	11.160561306227306	1.6652013348372183e-28
ENSG00000184939	ZFP90	16	cg25018951	4	25235369	13.383198531397435	5.4022328360678715e-40
ENSG00000184939	ZFP90	16	cg25625514	11	76535564	8.661608282948798	6.638674219553332e-18
ENSG00000184939	ZFP90	16	cg25691026	19	8670586	8.646529274517512	7.558569356093802e-18
ENSG00000184939	ZFP90	16	cg25771195	16	58163814	22.542323122281605	4.782272453160271e-106
ENSG00000184939	ZFP90	16	cg27403989	7	87501783	13.460196346693689	1.9984302029022987e-40
ENSG00000162078	ZG16B	16	cg23445878	12	127545350	7.861561419304257	4.844346625075764e-15
ENSG00000122386	ZNF205	16	cg02942825	19	46185348	11.479532476151512	4.916969394800186e-30
ENSG00000122386	ZNF205	16	cg09678939	6	149806081	7.713564644333356	1.5345774905619554e-14
ENSG00000122386	ZNF205	16	cg13963033	5	126220247	7.986361309323636	1.8016989930853177e-15
ENSG00000122386	ZNF205	16	cg15132169	6	149805995	7.148578058661404	1.0374374828722757e-12
ENSG00000122386	ZNF205	16	cg18951352	6	149806077	7.327893024224394	2.8140313419729136e-13
ENSG00000158805	ZNF276	16	cg03085549	16	75150819	-8.148024784557629	4.893562828465989e-16
ENSG00000158805	ZNF276	16	cg03743982	16	75150833	-7.474371603987255	9.470645418197541e-14
ENSG00000158805	ZNF276	16	cg03991512	16	75150456	-8.367214161604709	8.047824949650727e-17
ENSG00000158805	ZNF276	16	cg07320140	16	75150611	-8.5869549711798	1.2593958837980753e-17
ENSG00000158805	ZNF276	16	cg09899215	16	75150799	-6.925986505529865	5.020799059139523e-12
ENSG00000158805	ZNF276	16	cg16540789	16	75150784	-7.704011900767036	1.6507340633809862e-14
ENSG00000158805	ZNF276	16	cg21302420	1	112162376	-10.907218667847317	2.5652723981842756e-27
ENSG00000158805	ZNF276	16	cg24429836	16	75150744	-8.471792438870295	3.347839101387426e-17
[truncated: 634 more rows]
