# Supplementary material for: Genome-wide identification of genes regulating DNA methylation using genetic anchors for causal inference
Source: Genome Biol. 2020 Aug 28;21:220. doi: 10.1186/s13059-020-02114-z (PMC7453518; doi:10.1186/s13059-020-02114-z)
Supplement: Supplementary file 5 — Additional file 5: Table S4. Associations between GIs and trans CpGs that remained significant (P < 1.4 x 10-11) after taking LD/pleiotropy among neighboring genes into account and that were insensitive to additional tests of the underlying assumptions of the analyses. This is the final dataset that was used for further analyses. [file 13059_2020_2114_MOESM5_ESM.csv]

Ensembl_ID	HGNC_ID	Chr_gene	CpG	Chr_CpG	CpG_pos	Test_statistic	P_value
ENSG00000097021	ACOT7	1	cg15015518	1	17035497	-6.943196544888345	4.449790077158813e-12
ENSG00000188157	AGRN	1	cg09027357	8	256911	-7.611991534317675	3.3440121107247115e-14
ENSG00000143595	AQP10	1	cg02835499	17	46178918	9.735731234625264	3.736085805327957e-22
ENSG00000132694	ARHGEF11	1	cg23112950	11	66369765	-18.784783034498492	1.6009568712261829e-75
ENSG00000160072	ATAD3B	1	cg16196077	10	64028521	-18.24410258593405	1.6853010269409882e-71
ENSG00000143515	ATP8B2	1	cg25748542	3	119393058	18.718524830736133	5.201239509885719e-75
ENSG00000228594	C1orf233	1	cg16196077	10	64028521	-9.391806284345224	9.624731662141993e-21
ENSG00000186409	CCDC30	1	cg17459298	12	43946341	10.69975615057598	2.301564727633023e-26
ENSG00000196352	CD55	1	cg05958702	16	30960101	12.644416079854045	5.752056925828996e-36
ENSG00000130695	CEP85	1	cg19403339	2	183580841	-6.80762950489158	1.1393964327405448e-11
ENSG00000000971	CFH	1	cg07222861	1	32355084	-9.000418898358227	3.390916459976302e-19
ENSG00000162368	CMPK1	1	cg00999644	16	20817639	-9.261142137608768	3.2056858794798446e-20
ENSG00000116133	DHCR24	1	cg18517677	9	131799243	9.645474079430068	8.82306401012696e-22
ENSG00000156171	DRAM2	1	cg15830792	10	64893214	-8.851015624682272	1.27605551147739e-18
ENSG00000203965	EFCAB7	1	cg02609781	13	50656090	16.94793843001959	2.7253138542080568e-62
ENSG00000074800	ENO1	1	cg00994804	21	36259383	-7.1649772818232655	9.20754773212681e-13
ENSG00000074800	ENO1	1	cg01899542	16	49732224	7.349636219055795	2.3939969335404195e-13
ENSG00000074800	ENO1	1	cg02380135	2	149866270	7.9108747573148275	3.2760401221504335e-15
ENSG00000074800	ENO1	1	cg03142697	21	36258497	-7.621555532444808	3.106108044549061e-14
ENSG00000074800	ENO1	1	cg04086531	16	49732376	7.74360660314035	1.2141996517053424e-14
ENSG00000074800	ENO1	1	cg07633317	16	49732623	7.938582808515106	2.63027443688706e-15
ENSG00000074800	ENO1	1	cg08498747	17	41747669	8.48848860585849	2.903885593049172e-17
ENSG00000074800	ENO1	1	cg09092525	20	58570133	7.130095503349474	1.1832670118037009e-12
ENSG00000074800	ENO1	1	cg09827249	10	135051256	-7.930661243119751	2.8008671264366895e-15
ENSG00000074800	ENO1	1	cg12477880	21	36259241	-7.047291783683955	2.1364167129419705e-12
ENSG00000074800	ENO1	1	cg22698744	21	36263808	-7.947951411023845	2.4416939759637736e-15
ENSG00000074800	ENO1	1	cg23068772	7	30737061	8.056955086706507	1.0212569002404286e-15
ENSG00000074800	ENO1	1	cg25162533	17	81032067	7.629473663050805	2.923727381392779e-14
ENSG00000074800	ENO1	1	cg26929700	16	49732567	7.457947676650153	1.070229863845286e-13
ENSG00000187017	ESPN	1	cg11404039	4	155471778	14.837773187432553	1.567128341402347e-48
ENSG00000067208	EVI5	1	cg07340025	5	14926200	7.122628480128564	1.2483041787428746e-12
ENSG00000067208	EVI5	1	cg24334029	20	58296208	-6.8819004694939085	6.8199032124815265e-12
ENSG00000117480	FAAH	1	cg20693607	3	184319566	-10.756349651959715	1.2701152731431217e-26
ENSG00000143226	FCGR2A	1	cg18430411	8	144873183	11.416548202941705	9.919971114868655e-30
ENSG00000131781	FMO5	1	cg02953927	15	44038812	7.859139673892395	4.925928951195416e-15
ENSG00000134183	GNAT2	1	cg05051117	1	205719564	8.667827739162167	6.291742977827044e-18
ENSG00000143167	GPA33	1	cg11678250	7	136362483	10.541889351250703	1.1910605388562942e-25
ENSG00000213366	GSTM2	1	cg17024258	1	160370982	7.040605918161069	2.2415709498536462e-12
ENSG00000127124	HIVEP3	1	cg06770429	6	143206075	11.142539001079838	2.021535898700685e-28
ENSG00000153936	HS2ST1	1	cg10681811	5	76904661	7.500851372454572	7.753887309942899e-14
ENSG00000153936	HS2ST1	1	cg14655345	4	185659507	9.060380000402164	1.9825897976927069e-19
ENSG00000162729	IGSF8	1	cg07187863	1	32229600	7.172408521718895	8.731863576665517e-13
ENSG00000160712	IL6R	1	cg15312497	10	31192123	14.689208664544195	1.290636190385867e-47
ENSG00000160712	IL6R	1	cg24665000	14	42582755	10.917481995419687	2.3063041108647393e-27
ENSG00000160712	IL6R	1	cg25748542	3	119393058	-8.191553345594249	3.4352490214679154e-16
ENSG00000069424	KCNAB2	1	cg13925809	9	84646696	-8.543045897017295	1.8291856942794027e-17
ENSG00000069424	KCNAB2	1	cg13928313	7	2802073	-14.112745025916999	3.530016739865025e-44
ENSG00000117139	KDM5B	1	cg01620611	17	71306145	7.077376788865717	1.7257166590480345e-12
ENSG00000117139	KDM5B	1	cg05313153	8	119122430	7.023876514773598	2.5230255021997582e-12
ENSG00000117139	KDM5B	1	cg05368038	15	31621727	6.884114678761387	6.7187587142835016e-12
ENSG00000117139	KDM5B	1	cg05877497	2	66667946	7.151923408064221	1.0119710483302572e-12
ENSG00000117139	KDM5B	1	cg19743820	5	85913790	50.729386288944454	0
ENSG00000117139	KDM5B	1	cg25914270	5	85913777	28.268613657241428	1.6973075292715208e-160
ENSG00000117139	KDM5B	1	cg26537478	2	66668012	9.413480613236812	7.854136099240772e-21
ENSG00000076321	KLHL20	1	cg13849727	9	15810627	-19.130332426268954	3.7150747849924165e-78
ENSG00000157978	LDLRAP1	1	cg24623068	5	154317667	-19.51956498922139	3.832030117950171e-81
ENSG00000198799	LRIG2	1	cg17566920	6	141939449	7.118638811034855	1.2846629423098402e-12
ENSG00000132128	LRRC41	1	cg03492827	7	72838601	6.784208174815768	1.3379397602219128e-11
ENSG00000132128	LRRC41	1	cg12210255	7	72838671	6.89606661121165	6.183394194510549e-12
ENSG00000212916	MAP10	1	cg00953777	1	11714506	15.316731778234699	1.6240268445717493e-51
ENSG00000162576	MXRA8	1	cg06982628	22	38597918	9.283567224993138	2.6151187486796576e-20
ENSG00000162576	MXRA8	1	cg15271056	8	87520737	8.622331132849116	9.306000737773387e-18
ENSG00000142794	NBPF3	1	cg19638881	1	120395943	-11.332677144509839	2.5052783493293275e-29
ENSG00000142794	NBPF3	1	cg20858577	6	30036985	-9.148809376391764	8.934976655285109e-20
ENSG00000162711	NLRP3	1	cg00121209	19	54606151	-7.446635055378219	1.1648302369413998e-13
ENSG00000162711	NLRP3	1	cg14889079	19	54606153	-20.735573234954614	7.898400098630381e-91
ENSG00000162711	NLRP3	1	cg19219834	19	54610241	-11.237872078717617	7.118988948899153e-29
ENSG00000162600	OMA1	1	cg17179875	1	116961404	24.075482639447905	8.714676155889231e-120
ENSG00000143799	PARP1	1	cg21787323	11	85338252	7.532619253132122	6.104487712253355e-14
ENSG00000143799	PARP1	1	cg27539482	13	111589090	-33.9464875224723	2.292445054103194e-222
ENSG00000204138	PHACTR4	1	cg13071609	3	14336117	9.210488548451172	5.1002948438449944e-20
ENSG00000135845	PIGC	1	cg03745912	10	120924721	25.723403407686124	3.017295797983711e-135
ENSG00000143398	PIP5K1A	1	cg25754926	6	7986689	18.466898280138974	3.8714665785193224e-73
ENSG00000116711	PLA2G4A	1	cg15852841	15	55805949	7.44567309158186	1.1727261860408924e-13
ENSG00000149527	PLCH2	1	cg10374297	7	158066523	6.993143177421884	3.1344671246561098e-12
ENSG00000085998	POMGNT1	1	cg20693607	3	184319566	6.904968355502654	5.812057458818275e-12
ENSG00000131791	PRKAB2	1	cg02953927	15	44038812	-11.083776739873885	3.8215882909152957e-28
ENSG00000067606	PRKCZ	1	cg20148285	1	24018143	15.829175906511088	8.690831454902416e-55
ENSG00000067606	PRKCZ	1	cg20151207	17	57696971	7.999521692871549	1.6212052372196166e-15
ENSG00000142599	RERE	1	cg12525736	1	228269915	7.087512892290408	1.604831839969804e-12
ENSG00000168159	RNF187	1	cg05079548	7	128337621	-7.0972966932327886	1.4966843948547746e-12
ENSG00000168159	RNF187	1	cg05583632	22	25081868	7.732175247346535	1.3269427490354999e-14
ENSG00000187147	RNF220	1	cg01017464	18	47018095	-7.149639607246602	1.0289050629594743e-12
ENSG00000187147	RNF220	1	cg04388657	9	127623377	-8.156793413822143	4.556263711142524e-16
ENSG00000187147	RNF220	1	cg04761231	9	127623571	-6.979805516826809	3.443373017418491e-12
ENSG00000259834	RP11-284N8.3	1	cg15830792	10	64893214	15.62138257744951	1.8869320682327879e-53
ENSG00000269996	RP11-343N15.5	1	cg00454997	1	26222103	-7.105589608891804	1.4099257961598993e-12
ENSG00000269996	RP11-343N15.5	1	cg00646200	1	148855367	-40.58370074948284	2.786562739069795e-302
ENSG00000269996	RP11-343N15.5	1	cg02470959	12	132196036	-8.500982563243893	2.611209847342565e-17
ENSG00000269996	RP11-343N15.5	1	cg03593595	3	132977031	8.846470066091777	1.326433288008534e-18
ENSG00000269996	RP11-343N15.5	1	cg04935289	1	143767881	8.64875364070279	7.399958469082588e-18
ENSG00000269996	RP11-343N15.5	1	cg13574121	1	148855760	-7.9131669234600635	3.2157924793922814e-15
ENSG00000269996	RP11-343N15.5	1	cg15404665	19	4724679	-12.124831591433361	2.9359503555070212e-33
ENSG00000269996	RP11-343N15.5	1	cg20056341	15	49557625	-8.942640129525447	5.673414187297443e-19
ENSG00000269996	RP11-343N15.5	1	cg26681183	1	148855372	-13.786988671326473	2.7372946977871686e-42
ENSG00000260698	RP11-439E19.9	1	cg04279411	1	230645569	7.223268287517649	6.039235519464198e-13
ENSG00000224870	RP4-758J18.2	1	cg16196077	10	64028521	-10.110573918893442	9.53419113946192e-24
ENSG00000143653	SCCPDH	1	cg23496400	2	17721775	-9.742024794787351	3.500267760206559e-22
ENSG00000142669	SH3BGRL3	1	cg03487637	11	45940039	8.592508628668792	1.2005105802604167e-17
ENSG00000142669	SH3BGRL3	1	cg19403339	2	183580841	8.349100158742191	9.354931850000579e-17
ENSG00000085491	SLC25A24	1	cg01838916	5	85577056	19.07819031193875	9.386924946849973e-78
ENSG00000085491	SLC25A24	1	cg09032863	1	44412568	-9.797807172200894	2.044478745032563e-22
ENSG00000163866	SMIM12	1	cg12282830	22	29784441	-6.960347668274208	3.94509761763486e-12
ENSG00000162367	TAL1	1	cg00999644	16	20817639	6.954424012070751	4.1127045719630264e-12
ENSG00000169231	THBS3	1	cg05790982	4	4861404	-7.404320793414343	1.5987149614311185e-13
ENSG00000143155	TIPRL	1	cg25149069	1	233464229	8.930952889297753	6.298691016227635e-19
ENSG00000162542	TMCO4	1	cg18750937	12	67662516	11.075470332490386	4.190136809761363e-28
ENSG00000162542	TMCO4	1	cg18753664	12	124515061	33.50586981331551	2.713286096178618e-217
ENSG00000162542	TMCO4	1	cg18753962	13	45995831	18.379299476519467	1.661544687770869e-72
ENSG00000162542	TMCO4	1	cg18756771	10	112261994	13.250183149934786	2.960754173636183e-39
ENSG00000171729	TMEM51	1	cg11158179	1	61543011	-7.028202666424708	2.44611024386602e-12
ENSG00000186283	TOR3A	1	cg04525335	16	85877183	-13.420825836964447	3.2933960030271842e-40
ENSG00000158109	TPRG1L	1	cg20075270	10	46168220	-21.7069855911227	6.650417306574649e-99
ENSG00000215912	TTC34	1	cg05998672	11	986408	-10.618568955812666	5.385143373789451e-26
ENSG00000215912	TTC34	1	cg06780875	7	116331685	-8.452447570469431	3.939019637450098e-17
ENSG00000085831	TTC39A	1	cg27110877	5	77940704	12.828142899072	5.976923387433109e-37
ENSG00000116213	WRAP73	1	cg10434075	17	55038112	-16.728381670736194	8.754037120975251e-61
ENSG00000116213	WRAP73	1	cg20075270	10	46168220	-26.56977024461321	1.8022314827496908e-143
ENSG00000134684	YARS	1	cg03035248	3	50540699	12.785208691408096	1.0185875742237775e-36
ENSG00000134684	YARS	1	cg27618483	2	155433424	10.870771876776043	3.77424010726796e-27
ENSG00000185278	ZBTB37	1	cg13849727	9	15810627	-25.082633656211407	3.807511584971926e-129
ENSG00000160094	ZNF362	1	cg02063817	7	27253521	7.096059382711713	1.5097294294037021e-12
ENSG00000160094	ZNF362	1	cg05756918	7	27253707	7.109096098163539	1.3753869461021964e-12
ENSG00000160094	ZNF362	1	cg12187687	7	27253834	6.784274205471871	1.3368403228970396e-11
ENSG00000160094	ZNF362	1	cg18180846	10	102990855	7.684203615560181	1.9212820555232814e-14
ENSG00000125945	ZNF436	1	cg11294761	17	80275530	-6.83047014315533	9.738021289233598e-12
ENSG00000188295	ZNF669	1	cg00550498	19	12251208	8.681178110852398	5.600509814343216e-18
ENSG00000188295	ZNF669	1	cg27348863	6	169484769	13.115419396142071	1.6377421813448142e-38
ENSG00000235192	AC009495.2	2	cg14011387	9	134228590	-11.749073533891574	2.303014629898934e-31
ENSG00000186235	AC016757.3	2	cg01134436	17	81009848	9.521401501422805	2.8556849993708e-21
ENSG00000226321	AC104809.3	2	cg26822986	18	21199691	8.423524403067555	5.0233198313582686e-17
ENSG00000144218	AFF3	2	cg14165692	2	111367744	10.336064931582214	9.841261890016686e-25
ENSG00000173209	AHSA2	2	cg02765363	17	80200741	-7.773447872362849	9.62890634440705e-15
ENSG00000173209	AHSA2	2	cg19393755	17	71258101	-6.996622268444785	3.0569348312887714e-12
ENSG00000173209	AHSA2	2	cg26023268	17	71258215	-7.0394460211815515	2.258498729072908e-12
ENSG00000153107	ANAPC1	2	cg23229568	2	234663729	-10.247329109770094	2.415491056072653e-24
ENSG00000168397	ATG4B	2	cg17769387	4	84031278	-8.009638833013963	1.4934573024438652e-15
ENSG00000172116	CD8B	2	cg05746288	18	48405273	10.6143314179008	5.616276501914696e-26
ENSG00000172116	CD8B	2	cg11704396	3	48723701	7.517026422931264	6.866514081503127e-14
ENSG00000172116	CD8B	2	cg22448292	15	90234075	7.755787790673669	1.1046970769823355e-14
ENSG00000144354	CDCA7	2	cg00672093	2	139654844	7.308750552168988	3.2341635672568324e-13
ENSG00000144354	CDCA7	2	cg01148073	16	82126267	6.867289977945465	7.545871107016529e-12
ENSG00000144354	CDCA7	2	cg01185573	3	135432551	7.382944233534757	1.870728347299604e-13
ENSG00000144354	CDCA7	2	cg01311802	6	29430435	6.797851181302488	1.2178458469173965e-11
ENSG00000144354	CDCA7	2	cg01702210	14	58064926	8.192486408263617	3.4005252091703814e-16
ENSG00000144354	CDCA7	2	cg01890568	17	31437649	7.664076720669832	2.242198680702363e-14
ENSG00000144354	CDCA7	2	cg02204261	4	134787901	7.015801534396133	2.6696259176893235e-12
ENSG00000144354	CDCA7	2	cg02624836	2	67312537	7.466970330918836	1.0000645560067081e-13
ENSG00000144354	CDCA7	2	cg03078733	17	14822587	7.5912482595034545	3.9125014749181354e-14
ENSG00000144354	CDCA7	2	cg03625515	16	18157108	8.406638176191077	5.779574135287816e-17
ENSG00000144354	CDCA7	2	cg03804083	3	168891416	7.807607276783987	7.376053577613405e-15
ENSG00000144354	CDCA7	2	cg04157272	2	68017838	7.415144436689923	1.4727337489917807e-13
ENSG00000144354	CDCA7	2	cg04226903	4	187544998	7.701048444260775	1.686952939082099e-14
ENSG00000144354	CDCA7	2	cg04307853	17	6021418	7.635977424359741	2.7811020458280658e-14
ENSG00000144354	CDCA7	2	cg05121182	3	123812381	7.8457046057520525	5.4732779020069695e-15
ENSG00000144354	CDCA7	2	cg05399607	7	34874533	6.8681960870474565	7.498659094929656e-12
ENSG00000144354	CDCA7	2	cg05614028	18	44785758	7.0506161462845	2.086189377630443e-12
ENSG00000144354	CDCA7	2	cg05775492	16	86258717	8.035455315792055	1.2135117404971878e-15
ENSG00000144354	CDCA7	2	cg05851730	5	45204945	7.5191648828455815	6.754984744816344e-14
ENSG00000144354	CDCA7	2	cg06943845	2	6507982	8.226504306721747	2.573558005143838e-16
ENSG00000144354	CDCA7	2	cg07339864	7	70561125	7.64040319985727	2.688468178520571e-14
ENSG00000144354	CDCA7	2	cg07450292	3	76419070	6.815083027846057	1.0819053617634924e-11
ENSG00000144354	CDCA7	2	cg08442713	5	117822219	6.930412375264166	4.86425683603977e-12
ENSG00000144354	CDCA7	2	cg08493762	21	42222713	8.938200765315976	5.902529195458383e-19
ENSG00000144354	CDCA7	2	cg08942929	15	29825426	7.344504356539234	2.4858317339808215e-13
ENSG00000144354	CDCA7	2	cg09196534	7	77975971	7.834878566079127	5.958395052554823e-15
ENSG00000144354	CDCA7	2	cg09323806	7	141617279	6.902357193009663	5.915254258068757e-12
ENSG00000144354	CDCA7	2	cg09959790	13	59616937	6.918113605706514	5.300288906991538e-12
ENSG00000144354	CDCA7	2	cg10153214	16	71571146	6.836454832743708	9.338282754210171e-12
ENSG00000144354	CDCA7	2	cg10310168	1	4376380	7.5343120009674465	6.025090526434718e-14
ENSG00000144354	CDCA7	2	cg10325509	10	24269469	7.04777364137763	2.1287100050476557e-12
ENSG00000144354	CDCA7	2	cg10453777	13	62245229	7.155503987892556	9.855752296984673e-13
ENSG00000144354	CDCA7	2	cg10907582	14	96411400	6.915352280770857	5.4033338712841035e-12
ENSG00000144354	CDCA7	2	cg10962805	2	125672110	7.38834091054153	1.7973358389087423e-13
ENSG00000144354	CDCA7	2	cg11005831	5	15928441	6.822901349303587	1.0252428625100736e-11
ENSG00000144354	CDCA7	2	cg11388802	1	181577847	7.7372984158626865	1.2746812553139732e-14
ENSG00000144354	CDCA7	2	cg11751344	8	92622592	7.049201674093875	2.1072430411929983e-12
ENSG00000144354	CDCA7	2	cg12045030	2	220865785	8.130310944412608	5.642940199093785e-16
ENSG00000144354	CDCA7	2	cg12101474	7	118427418	7.281851594648941	3.9391404372943004e-13
ENSG00000144354	CDCA7	2	cg12324708	5	130329173	7.166725187602757	9.090377978007211e-13
ENSG00000144354	CDCA7	2	cg13005228	5	134987654	7.27035887976077	4.284507497845289e-13
ENSG00000144354	CDCA7	2	cg13298997	7	32038956	6.922529963980411	5.139474875459753e-12
ENSG00000144354	CDCA7	2	cg13471209	1	82165326	6.815967152120026	1.0753469673811468e-11
ENSG00000144354	CDCA7	2	cg13593284	9	74761911	7.7619199138691295	1.0530136746379178e-14
ENSG00000144354	CDCA7	2	cg13797580	2	215494121	7.498822949148779	7.873519989055385e-14
ENSG00000144354	CDCA7	2	cg14014950	3	64125334	7.778365284526125	9.26573138545913e-15
ENSG00000144354	CDCA7	2	cg14444650	2	19406301	6.84061561362798	9.074034901088866e-12
ENSG00000144354	CDCA7	2	cg14660328	11	79878290	8.737070837659378	3.449790499830651e-18
ENSG00000144354	CDCA7	2	cg14790000	5	127805611	7.071695614198181	1.7958380875779643e-12
ENSG00000144354	CDCA7	2	cg15359390	2	79365892	7.056705998689682	1.9978780896030115e-12
ENSG00000144354	CDCA7	2	cg15396204	1	107348393	6.979485529016156	3.4485395236957865e-12
ENSG00000144354	CDCA7	2	cg15442888	4	175789139	6.987944140192097	3.249277359217292e-12
ENSG00000144354	CDCA7	2	cg15985891	1	66323190	7.212582275591564	6.524865981690583e-13
ENSG00000144354	CDCA7	2	cg16086730	5	9782142	7.544309279560993	5.58644349427997e-14
ENSG00000144354	CDCA7	2	cg16418228	3	54963186	6.996775868539637	3.053281174212073e-12
ENSG00000144354	CDCA7	2	cg16531181	10	130185387	6.793122865094846	1.2579855789472171e-11
ENSG00000144354	CDCA7	2	cg17144548	2	5679308	6.909549719152537	5.6263116596618e-12
ENSG00000144354	CDCA7	2	cg17346345	2	79743491	7.527864268330544	6.325784039554096e-14
ENSG00000144354	CDCA7	2	cg17689601	10	83651137	7.793674643668611	8.223631880748302e-15
ENSG00000144354	CDCA7	2	cg17804071	3	73596205	8.309593983351812	1.2971157026802652e-16
ENSG00000144354	CDCA7	2	cg18387985	11	15350125	8.0240940796068	1.3293137746973902e-15
ENSG00000144354	CDCA7	2	cg18484189	11	7984973	6.987963659053713	3.2488308714991957e-12
ENSG00000144354	CDCA7	2	cg19631651	3	55005522	7.437821740150436	1.243673146161641e-13
ENSG00000144354	CDCA7	2	cg20316883	8	138493473	6.995724370529011	3.07599380424667e-12
ENSG00000144354	CDCA7	2	cg20480334	11	78799391	7.453328674554617	1.1075953907585453e-13
ENSG00000144354	CDCA7	2	cg21150108	13	34750105	6.9692861287687755	3.704794904768639e-12
ENSG00000144354	CDCA7	2	cg21395077	9	118687465	6.875133115896122	7.1466800941021906e-12
ENSG00000144354	CDCA7	2	cg22379436	3	73789574	7.112333751077818	1.3436153221901927e-12
ENSG00000144354	CDCA7	2	cg23411426	8	36955985	7.07688385246184	1.7306912784037227e-12
ENSG00000144354	CDCA7	2	cg23715749	1	37413867	7.2485732801831	5.022739189627787e-13
ENSG00000144354	CDCA7	2	cg23912509	12	97957406	7.07647946696028	1.7356845355368574e-12
ENSG00000144354	CDCA7	2	cg24270629	18	50823537	7.031073277798572	2.3962535451710154e-12
ENSG00000144354	CDCA7	2	cg24294950	7	126752911	7.673041116955973	2.0929728331977787e-14
ENSG00000144354	CDCA7	2	cg24346464	1	164872273	7.923519607939965	2.963069552880975e-15
ENSG00000144354	CDCA7	2	cg24520479	4	163906031	6.853686001500168	8.290725237745227e-12
ENSG00000144354	CDCA7	2	cg25879062	11	130386122	6.961162549116531	3.9221759709714635e-12
ENSG00000144354	CDCA7	2	cg26094484	10	133318755	6.966880359030327	3.767909332625871e-12
ENSG00000144354	CDCA7	2	cg26837853	8	3970118	8.154279772354414	4.644050139191103e-16
ENSG00000144354	CDCA7	2	cg27574973	7	78218446	7.914008492366021	3.1948369240806842e-15
ENSG00000115561	CHMP3	2	cg09409356	1	163468474	-9.989486226233511	3.155535998821862e-23
ENSG00000115561	CHMP3	2	cg20908556	4	124606293	-10.16555463329639	5.4983167693033654e-24
ENSG00000144524	COPS7B	2	cg01370599	3	116745421	-11.680038596003618	5.07280628578706e-31
ENSG00000119772	DNMT3A	2	cg01120308	11	85780971	8.358921217686836	8.615202870692652e-17
ENSG00000119772	DNMT3A	2	cg01942927	1	212588536	7.111894532100123	1.34828042392242e-12
ENSG00000119772	DNMT3A	2	cg12869229	12	56618373	6.864723391793808	7.683345000186775e-12
ENSG00000119772	DNMT3A	2	cg15995296	11	67210812	7.17122619762119	8.802977860639388e-13
ENSG00000119772	DNMT3A	2	cg22333846	19	17580131	7.214463158098297	6.438643372981483e-13
ENSG00000188542	DUSP28	2	cg08817644	19	20150334	7.325894012207147	2.8524836523194506e-13
ENSG00000197872	FAM49A	2	cg11254532	1	61520399	-17.240687490285147	2.5110640741698805e-64
ENSG00000163013	FBXO41	2	cg23020402	6	24666573	-7.605954277401835	3.4991808893759546e-14
ENSG00000005436	GCFC2	2	cg03425731	12	8665044	14.07795986984735	5.616509176645212e-44
ENSG00000178295	GEN1	2	cg05000488	7	23749740	-21.70162448542761	7.209972263574569e-99
ENSG00000068024	HDAC4	2	cg02058194	22	41215556	10.057270681951348	1.612537158788793e-23
ENSG00000150540	HNMT	2	cg22542120	4	133045158	-10.97608133417449	1.2201103360097935e-27
ENSG00000150540	HNMT	2	cg25299176	17	1303341	-9.772975617238439	2.5948425587006567e-22
ENSG00000163596	ICA1L	2	cg04090794	1	92099858	9.768254019469351	2.71797208640817e-22
ENSG00000125629	INSIG2	2	cg12284736	1	80603921	-7.577500029848471	4.343410967601865e-14
ENSG00000172059	KLF11	2	cg04130656	6	6606765	7.1397065556550485	1.1043747138370851e-12
ENSG00000124831	LRRFIP1	2	cg12512271	3	178976891	9.63310791281529	9.92159400970535e-22
ENSG00000172005	MAL	2	cg02973320	1	162467753	-10.125769956637669	8.159593925750893e-24
ENSG00000247626	MARS2	2	cg06799605	2	174146611	9.341396314965607	1.5302456023253443e-20
ENSG00000124370	MCEE	2	cg06263740	8	12565344	10.90719358031588	2.558821135345646e-27
ENSG00000116062	MSH6	2	cg23944298	3	127248864	7.609303607726991	3.4100518175534277e-14
ENSG00000173272	MZT2A	2	cg00677195	10	7661611	17.413073847865647	1.5473054219264746e-65
ENSG00000173272	MZT2A	2	cg10997922	18	55470506	-10.730283002263686	1.6660343671336592e-26
ENSG00000173272	MZT2A	2	cg24630195	5	2748369	-19.67560810621324	2.262718503139924e-82
ENSG00000115687	PASK	2	cg08612384	17	27228511	-11.018575148142789	7.7566537816270125e-28
ENSG00000125618	PAX8	2	cg05725004	1	76082568	-7.635036940451476	2.8023779042025335e-14
ENSG00000125618	PAX8	2	cg09260603	1	206809102	-12.180344858060867	1.529815757691884e-33
ENSG00000125618	PAX8	2	cg20257372	17	1945152	-11.345087748655283	2.182548244869921e-29
ENSG00000156973	PDE6D	2	cg01370599	3	116745421	-9.110145647295317	1.2670953260657761e-19
ENSG00000143870	PDIA6	2	cg25804018	8	140716671	-9.305096744842087	2.1404541595443884e-20
ENSG00000163803	PLB1	2	cg04222728	7	138549665	-7.070029776396918	1.8176903202743752e-12
ENSG00000163803	PLB1	2	cg23261319	2	182713409	-7.095478553734494	1.5160659912511638e-12
ENSG00000163803	PLB1	2	cg24974982	22	46403316	-6.850736980363627	8.463220861678876e-12
ENSG00000163803	PLB1	2	cg27661394	4	4661952	-7.846548345672751	5.439073108346238e-15
ENSG00000180228	PRKRA	2	cg14011486	1	26737247	11.0585812547046	5.018342617961141e-28
ENSG00000180228	PRKRA	2	cg18634211	1	26737262	9.938026217665554	5.2194366994426234e-23
ENSG00000144134	RABL2A	2	cg19565306	22	51222011	15.97982599485828	8.844888532529989e-56
ENSG00000144134	RABL2A	2	cg22012975	22	51222043	14.130991671012161	2.75017274807992e-44
ENSG00000155636	RBM45	2	cg12665724	11	43364829	-10.140910196341677	7.020213460152404e-24
ENSG00000155636	RBM45	2	cg20512924	13	22021376	8.071224327998962	9.102566100313225e-16
ENSG00000260804	RP11-566E18.3	2	cg05607577	6	43544120	12.799019447243627	8.562852032318918e-37
ENSG00000153574	RPIA	2	cg08581953	13	25593057	-8.885009892496376	9.44672353124635e-19
ENSG00000035115	SH3YL1	2	cg07031794	2	26568949	-15.840537669728375	7.129352573489919e-55
ENSG00000035115	SH3YL1	2	cg11347411	7	150020925	-46.258643252124784	0
ENSG00000035115	SH3YL1	2	cg12354986	22	38142174	-13.425067950884653	3.110346232421503e-40
ENSG00000035115	SH3YL1	2	cg22324358	7	2583541	16.526484606908085	2.0355721094564376e-59
ENSG00000035115	SH3YL1	2	cg24475146	1	154530781	-29.28220379709324	4.396877748846503e-171
ENSG00000196950	SLC39A10	2	cg19368679	12	120555201	-9.747223115951915	3.3259014366773006e-22
ENSG00000196950	SLC39A10	2	cg19369556	16	82661725	-13.404261914096264	4.068989739912804e-40
ENSG00000079263	SP140	2	cg18745131	7	1269963	7.105481413760377	1.411356488975587e-12
ENSG00000198369	SPRED2	2	cg08951638	5	141706213	-7.215896838984245	6.370661199116214e-13
ENSG00000151353	TMEM18	2	cg11083276	6	24911313	9.376497271309319	1.105126269170438e-20
ENSG00000151353	TMEM18	2	cg12228919	15	44955936	10.067759232333168	1.452197319600058e-23
ENSG00000151353	TMEM18	2	cg18912160	10	3281074	-8.29598585526427	1.4514705020836604e-16
ENSG00000226479	TMEM185B	2	cg24778081	11	506932	-7.483302314918891	8.848945723050768e-14
ENSG00000189362	TMEM194B	2	cg13357708	6	7986216	-10.34278878572511	9.187948920979928e-25
ENSG00000204104	TRAF3IP1	2	cg01405143	19	9649327	-11.709926369095468	3.6088909240013464e-31
ENSG00000204104	TRAF3IP1	2	cg07594831	8	101315560	-9.959658392216316	4.224280663320298e-23
ENSG00000204104	TRAF3IP1	2	cg16021909	1	248021091	-11.897687976985628	4.172989551613247e-32
ENSG00000204104	TRAF3IP1	2	cg17784811	6	31079617	-12.215283267716533	1.0105026828056315e-33
ENSG00000071575	TRIB2	2	cg01890083	4	183966200	9.32273848450417	1.8172353024098828e-20
ENSG00000032389	TSSC1	2	cg20313246	10	134997471	9.583069105150573	1.5941587400627574e-21
ENSG00000032389	TSSC1	2	cg27344576	8	109260414	-7.452683443498888	1.1129000197542081e-13
ENSG00000123607	TTC21B	2	cg14011387	9	134228590	15.644598917526599	1.3189054000422683e-53
ENSG00000184182	UBE2F	2	cg06893834	19	19843560	-9.782311764425769	2.374274921462366e-22
ENSG00000184182	UBE2F	2	cg16319085	4	85076551	-11.375811139435815	1.5511105769646813e-29
ENSG00000118965	WDR35	2	cg06625576	17	40179813	8.23446283641539	2.411109215798989e-16
ENSG00000114770	ABCC5	3	cg01268824	19	58220818	7.790204811422398	8.457480012529158e-15
ENSG00000114770	ABCC5	3	cg01832549	1	19774989	-7.697186815014597	1.739567904142648e-14
ENSG00000114770	ABCC5	3	cg03234186	19	58220657	8.44005840456749	4.3720397580941475e-17
ENSG00000114770	ABCC5	3	cg08668790	19	58220662	8.092952223799221	7.645499566152574e-16
ENSG00000114770	ABCC5	3	cg12506930	19	58220718	7.3983609982789496	1.6698315103738553e-13
ENSG00000114770	ABCC5	3	cg26465391	19	58220773	7.076679764905923	1.7343764764004092e-12
ENSG00000114770	ABCC5	3	cg27049766	19	58220516	6.946844830335558	4.338877606133885e-12
ENSG00000114770	ABCC5	3	cg27324426	19	58220837	7.226691245192518	5.893959955159357e-13
ENSG00000163686	ABHD6	3	cg11805559	10	134859687	-30.477598373999097	8.984947875545086e-184
ENSG00000069849	ATP1B3	3	cg23519930	2	60963021	-7.918774438365436	3.0771156316013997e-15
ENSG00000113916	BCL6	3	cg01032851	16	68994912	7.123818331925384	1.2375020425537915e-12
ENSG00000113916	BCL6	3	cg01512113	1	1680232	7.681670865266346	1.9585678865934068e-14
ENSG00000113916	BCL6	3	cg03998636	13	111210121	10.589078475113373	7.296923231561759e-26
ENSG00000113916	BCL6	3	cg06773488	18	74726002	6.806359718705683	1.148752289626353e-11
ENSG00000113916	BCL6	3	cg07081759	10	126330905	7.019081950716797	2.6084375131049747e-12
ENSG00000113916	BCL6	3	cg08851837	16	57558820	8.812093542690258	1.7935048031586418e-18
ENSG00000113916	BCL6	3	cg09743650	16	85675160	7.290431890294065	3.699271391751843e-13
ENSG00000113916	BCL6	3	cg10013455	10	134400191	7.223247982881693	6.038835129334912e-13
ENSG00000113916	BCL6	3	cg10967866	10	134362164	7.902067500894377	3.5112288409661517e-15
ENSG00000113916	BCL6	3	cg12120406	17	25822056	8.204436802534268	3.083816159443811e-16
ENSG00000113916	BCL6	3	cg13380995	6	37670128	8.767301067710022	2.6521209756540885e-18
ENSG00000113916	BCL6	3	cg13821176	8	126448338	8.093426313457872	7.607620146853963e-16
ENSG00000113916	BCL6	3	cg14009440	1	45138784	8.571527391548491	1.4341444171789743e-17
ENSG00000113916	BCL6	3	cg14237301	16	28506477	9.78446667233519	2.323769247525774e-22
ENSG00000113916	BCL6	3	cg17192599	7	151504864	6.896451437114335	6.163339081554681e-12
ENSG00000113916	BCL6	3	cg18222865	11	14664689	7.813281418923752	7.056067902116081e-15
ENSG00000113916	BCL6	3	cg19137806	10	134362170	8.443207539442154	4.2521018246587896e-17
ENSG00000113916	BCL6	3	cg21346154	2	70699808	7.659187761025855	2.3279448687303253e-14
ENSG00000113916	BCL6	3	cg22448090	1	200978598	8.407786839767537	5.724233277787853e-17
ENSG00000113916	BCL6	3	cg24695071	7	2419958	7.593086427179133	3.85814675247803e-14
ENSG00000113916	BCL6	3	cg26426564	10	134371746	7.9605167562753305	2.208843187744809e-15
ENSG00000113916	BCL6	3	cg26468118	13	111175670	7.698604364877336	1.7190523431496702e-14
ENSG00000113916	BCL6	3	cg26508444	10	126330845	8.294145377596799	1.4740587754730857e-16
ENSG00000113916	BCL6	3	cg27262415	11	67205166	-6.89962274881231	6.028879207278976e-12
ENSG00000113916	BCL6	3	cg27389255	11	14664598	9.473580601001077	4.47159835309464e-21
ENSG00000144712	CAND2	3	cg22611419	17	77070824	10.494688978928215	1.9403853286197809e-25
ENSG00000244607	CCDC13	3	cg11293112	17	17809020	-12.84234319861453	5.013607166175951e-37
ENSG00000163528	CHCHD4	3	cg14367344	1	146644336	-13.45797324640491	2.040921879039117e-40
ENSG00000178700	DHFRL1	3	cg02491787	7	102739136	-7.63493537214164	2.8029201568287318e-14
ENSG00000138246	DNAJC13	3	cg26709343	16	69373945	-8.95229083893865	5.207445221034577e-19
ENSG00000132394	EEFSEC	3	cg19802243	6	160321205	7.778683183433121	9.249696485399531e-15
ENSG00000132394	EEFSEC	3	cg19805863	1	246254338	55.9089007377747	0
ENSG00000236438	FAM157A	3	cg13412283	7	65280	7.6049501112155395	3.52459570059533e-14
ENSG00000185112	FAM43A	3	cg13711851	9	124080947	-8.254321302527645	2.0482667768797308e-16
ENSG00000185112	FAM43A	3	cg14263575	9	95530146	-8.668431819261407	6.250314245994735e-18
ENSG00000168827	GFM1	3	cg23275840	4	47708675	13.149588319637594	1.058233448385566e-38
ENSG00000170266	GLB1	3	cg16660899	1	167095593	6.898837213627579	6.063432579076621e-12
ENSG00000082701	GSK3B	3	cg02809009	19	50354510	16.430742518181447	9.058830665718838e-59
ENSG00000163754	GYG1	3	cg24089360	19	57699963	-42.10914591351554	1.72e-321
ENSG00000163755	HPS3	3	cg24089360	19	57699963	-7.193991826396995	7.465786891400261e-13
ENSG00000172037	LAMB2	3	cg03492460	6	88441469	6.808830395136309	1.1305390512258028e-11
ENSG00000242086	LINC00969	3	cg04481584	5	231809	-14.907382242455368	5.864857729570868e-49
ENSG00000242086	LINC00969	3	cg07608658	3	9851477	22.573603327456404	2.475678862087147e-106
ENSG00000242086	LINC00969	3	cg17016932	5	1654343	11.818545377611958	1.0424416929532074e-31
ENSG00000242086	LINC00969	3	cg17482712	5	218077	7.667980202427641	2.177504432786157e-14
ENSG00000242086	LINC00969	3	cg17952111	19	54960355	16.350459599870895	3.1469796320017626e-58
ENSG00000242086	LINC00969	3	cg20365451	2	242961267	-13.176877023997095	7.534318042595085e-39
ENSG00000242086	LINC00969	3	cg20990478	5	272354	30.413517967290407	4.859860775642943e-183
ENSG00000242086	LINC00969	3	cg24069048	5	256469	-11.634834217578199	8.495670891630976e-31
ENSG00000093167	LRRFIP2	3	cg02012712	14	20779703	7.189518070524067	7.71229361433723e-13
ENSG00000176945	MUC20	3	cg07608658	3	9851477	-16.210775365660076	2.676011530053798e-57
ENSG00000176945	MUC20	3	cg17952111	19	54960355	-16.573748993845538	9.917215018311558e-60
ENSG00000176945	MUC20	3	cg20990478	5	272354	-6.959395425041325	3.972860062058592e-12
ENSG00000144909	OSBPL11	3	cg21903625	3	12810386	7.321386766489287	2.9477302426581783e-13
ENSG00000151093	OXSM	3	cg27474149	6	29572333	-14.052433899459219	7.908668581877852e-44
ENSG00000144647	POMGNT2	3	cg11293112	17	17809020	10.084245527531019	1.2345759874174016e-23
ENSG00000168297	PXK	3	cg11805559	10	134859687	-26.852467403355497	2.922614592308016e-146
ENSG00000168028	RPSA	3	cg26457421	3	56591241	10.17119245977478	5.185706313334412e-24
ENSG00000138468	SENP7	3	cg00298065	19	58715577	12.981518305433536	8.829505610578207e-38
ENSG00000138468	SENP7	3	cg00541956	19	58455018	-12.730319968331107	2.0008869767842824e-36
ENSG00000138468	SENP7	3	cg00569896	4	204382	-15.813700466109042	1.0718784364301333e-54
ENSG00000138468	SENP7	3	cg00578032	19	38308069	-9.856951503029768	1.1519725385277875e-22
ENSG00000138468	SENP7	3	cg00647741	19	58693450	-13.507033047049863	1.0790712264764329e-40
ENSG00000138468	SENP7	3	cg00880079	19	37157318	-7.26060235060481	4.601714692933066e-13
ENSG00000138468	SENP7	3	cg01268824	19	58220818	-16.661149597967466	2.5132567040232673e-60
ENSG00000138468	SENP7	3	cg01436998	19	38308263	-8.091190502010427	7.748383480350999e-16
ENSG00000138468	SENP7	3	cg01501009	19	57183268	-10.098441260472178	1.0719745287177171e-23
ENSG00000138468	SENP7	3	cg01586208	19	22806647	7.936610416272732	2.6716030785885007e-15
ENSG00000138468	SENP7	3	cg01644850	19	58193231	-10.298773526150086	1.4356392329185884e-24
ENSG00000138468	SENP7	3	cg01947224	19	58089885	-8.563188516423907	1.5403297427837003e-17
ENSG00000138468	SENP7	3	cg02280912	19	58400095	-19.499232840103975	5.413019502302389e-81
ENSG00000138468	SENP7	3	cg02348449	19	58630429	-7.181618929380802	8.165383691880799e-13
ENSG00000138468	SENP7	3	cg02940165	19	57149563	-10.570693197997164	8.838607486912027e-26
ENSG00000138468	SENP7	3	cg03007201	19	57875238	-10.104757030783732	1.0067031261078022e-23
ENSG00000138468	SENP7	3	cg03077453	19	52900914	-8.701207036227004	4.7092005401933414e-18
ENSG00000138468	SENP7	3	cg03092271	19	23945472	-9.324153306581033	1.7953181029740614e-20
ENSG00000138468	SENP7	3	cg03142586	19	58220080	-8.036841935095175	1.2003884807095834e-15
ENSG00000138468	SENP7	3	cg03234186	19	58220657	-20.574042384942686	1.6127753054951723e-89
ENSG00000138468	SENP7	3	cg03562414	19	52391078	-11.745261046517284	2.4097824224381503e-31
ENSG00000138468	SENP7	3	cg03584535	19	58280832	-11.008184915546861	8.652685405463416e-28
ENSG00000138468	SENP7	3	cg03975694	19	38042472	-9.034597131817447	2.499956464970143e-19
ENSG00000138468	SENP7	3	cg04062087	19	58666832	-7.0259968621989275	2.484309826104864e-12
ENSG00000138468	SENP7	3	cg04206284	7	64127516	-7.5830354803787845	4.16555997856558e-14
ENSG00000138468	SENP7	3	cg04358463	19	56215104	-7.243055744276032	5.22962018348795e-13
ENSG00000138468	SENP7	3	cg04684267	19	58694502	-19.444526216259437	1.4367626043035345e-80
ENSG00000138468	SENP7	3	cg04818919	19	37998171	-8.693121710508255	5.050216649369702e-18
ENSG00000138468	SENP7	3	cg05023114	19	58176305	7.651929273504736	2.461759566284181e-14
ENSG00000138468	SENP7	3	cg05220114	19	58223693	-13.913102426018611	5.1388309232889385e-43
ENSG00000138468	SENP7	3	cg05280698	19	37825388	-12.915992427536121	2.0034937118922918e-37
ENSG00000138468	SENP7	3	cg05508084	19	56988398	-6.9521072153231245	4.179864913532344e-12
ENSG00000138468	SENP7	3	cg05661282	19	58220370	-14.480427126262457	2.3084501101417375e-46
ENSG00000138468	SENP7	3	cg05974498	19	52599256	-10.041999412223548	1.8762798751605727e-23
ENSG00000138468	SENP7	3	cg05983315	19	58545837	-7.617815167847696	3.1959410981749e-14
ENSG00000138468	SENP7	3	cg06368093	19	58513526	-9.69924529079228	5.276317336473623e-22
ENSG00000138468	SENP7	3	cg06442489	19	58630612	-10.440458605247054	3.3875396547463235e-25
ENSG00000138468	SENP7	3	cg06458239	19	58038573	-8.289032491414035	1.5381569333987276e-16
ENSG00000138468	SENP7	3	cg06484123	19	53107200	-10.532376578004241	1.3144823198145996e-25
ENSG00000138468	SENP7	3	cg06585566	19	57276794	-7.983035252115301	1.8465062602614537e-15
ENSG00000138468	SENP7	3	cg06615754	19	58193071	-21.678864108380335	1.1530929856408721e-98
ENSG00000138468	SENP7	3	cg06707978	19	58095155	-7.654591823644474	2.4120071099430713e-14
ENSG00000138468	SENP7	3	cg06878361	19	52390810	-8.790352513945455	2.169820873844847e-18
ENSG00000138468	SENP7	3	cg06940614	19	38182773	-10.994202540761947	1.0058523483173938e-27
ENSG00000138468	SENP7	3	cg06942685	19	56879432	-7.932492279065406	2.7603217715485e-15
ENSG00000138468	SENP7	3	cg07172885	12	133757907	-7.274808073849814	4.1481416535608346e-13
ENSG00000138468	SENP7	3	cg07237326	19	37742739	-10.16630386082526	5.447504688869793e-24
ENSG00000138468	SENP7	3	cg07474494	19	58446600	-14.121592969949218	3.1230009580590055e-44
ENSG00000138468	SENP7	3	cg07685728	19	58280891	-12.623618340719958	7.406451932878039e-36
ENSG00000138468	SENP7	3	cg07788092	19	9473691	-7.658612197618381	2.3387516077137673e-14
ENSG00000138468	SENP7	3	cg07808761	19	37329760	-8.331601302160573	1.0810023815254116e-16
ENSG00000138468	SENP7	3	cg07815836	19	58715351	11.338050461228285	2.3571064712490217e-29
ENSG00000138468	SENP7	3	cg07816786	19	37063800	-8.995730849059655	3.5390448429547445e-19
ENSG00000138468	SENP7	3	cg07894352	19	44763993	-8.434475491442367	4.577374580228181e-17
ENSG00000138468	SENP7	3	cg08103220	16	2977336	-10.83359206759178	5.5981791291201226e-27
ENSG00000138468	SENP7	3	cg08146323	19	57183118	-10.414520766777162	4.418681498916423e-25
ENSG00000138468	SENP7	3	cg08158952	19	57183016	-11.712976776095994	3.4844933459596505e-31
ENSG00000138468	SENP7	3	cg08333333	19	57182844	-10.258073460935995	2.1663433818039723e-24
ENSG00000138468	SENP7	3	cg08527195	1	161442697	8.908870401073598	7.656664820229431e-19
ENSG00000138468	SENP7	3	cg08648727	19	58446436	-8.293149759751307	1.4866810495336846e-16
ENSG00000138468	SENP7	3	cg08668790	19	58220662	-18.386022837542708	1.4632487021818496e-72
ENSG00000138468	SENP7	3	cg09013032	4	88225834	7.326635515075168	2.836188333025559e-13
ENSG00000138468	SENP7	3	cg09259115	19	37288793	-7.334938860190462	2.667957234063786e-13
ENSG00000138468	SENP7	3	cg09279169	19	38147309	-9.311156799658418	2.0239676637195097e-20
ENSG00000138468	SENP7	3	cg09547119	19	52391367	-11.292887992293224	3.8827253046979176e-29
ENSG00000138468	SENP7	3	cg09578475	19	9473688	-7.179239236295021	8.306933316031788e-13
ENSG00000138468	SENP7	3	cg09643544	19	9473696	-7.964387339210297	2.1423693852623494e-15
ENSG00000138468	SENP7	3	cg10051935	19	58740549	-11.236456303819917	7.225329550212737e-29
ENSG00000138468	SENP7	3	cg10132208	19	58545542	-7.69168386068559	1.813635654162355e-14
ENSG00000138468	SENP7	3	cg10635122	19	52391090	-11.355726972521923	1.937863738437719e-29
ENSG00000138468	SENP7	3	cg10705236	19	57901745	-7.842500546264751	5.613972343780395e-15
ENSG00000138468	SENP7	3	cg10710439	19	38183976	-11.02152820062209	7.493493290195478e-28
ENSG00000138468	SENP7	3	cg10783469	19	52391234	-9.513306128750921	3.0813032818068327e-21
ENSG00000138468	SENP7	3	cg10850725	19	44764380	-6.845387426925226	8.78121420925092e-12
ENSG00000138468	SENP7	3	cg11269599	19	52391304	-9.890515207508965	8.308164013340065e-23
ENSG00000138468	SENP7	3	cg11294513	19	58220295	-18.822443730390674	8.106335059673432e-76
ENSG00000138468	SENP7	3	cg11312896	19	58545122	-9.321598367253657	1.838152340227105e-20
ENSG00000138468	SENP7	3	cg11335411	19	58694111	-16.27145317434751	1.0492044849436438e-57
ENSG00000138468	SENP7	3	cg11546251	19	58322078	-7.390748598647565	1.7658424105567187e-13
ENSG00000138468	SENP7	3	cg11680826	19	37710094	-8.024550157520046	1.3248032224149144e-15
ENSG00000138468	SENP7	3	cg11788523	19	58446770	-17.86605109627985	9.147945797835094e-69
ENSG00000138468	SENP7	3	cg11909748	19	52956674	-7.588740397904636	3.9887022139046385e-14
ENSG00000138468	SENP7	3	cg11998703	19	58446669	-15.269530966773154	3.232359044526818e-51
ENSG00000138468	SENP7	3	cg12024906	19	37825679	-11.771515738311683	1.7841433279235175e-31
ENSG00000138468	SENP7	3	cg12227172	19	52391411	-8.913376653699451	7.357446528670328e-19
ENSG00000138468	SENP7	3	cg12259537	19	58514694	-8.252803808817227	2.0738654456831996e-16
ENSG00000138468	SENP7	3	cg12302428	19	52408520	-7.225198058315923	5.954918175598807e-13
ENSG00000138468	SENP7	3	cg12506930	19	58220718	-19.782236587673918	3.347483051023055e-83
ENSG00000138468	SENP7	3	cg12665460	19	52956657	-7.01715147932107	2.6446811946537373e-12
ENSG00000138468	SENP7	3	cg12717203	4	124342	-6.8434405347181135	8.900051269004791e-12
ENSG00000138468	SENP7	3	cg12948621	19	37825446	-11.019482117976933	7.660685019417167e-28
ENSG00000138468	SENP7	3	cg12961842	19	58446758	-11.987553186191468	1.4690790576912422e-32
ENSG00000138468	SENP7	3	cg13122377	19	57683687	-11.774666220924697	1.7208632335094491e-31
ENSG00000138468	SENP7	3	cg13208922	4	299022	-11.469497517734647	5.457026703844782e-30
ENSG00000138468	SENP7	3	cg13337047	19	57683843	-9.386443514137023	1.008491788120317e-20
ENSG00000138468	SENP7	3	cg13382661	19	58280767	-7.624002698044998	3.048417182114172e-14
ENSG00000138468	SENP7	3	cg13393830	19	52391605	-10.80543022835168	7.546036569942778e-27
ENSG00000138468	SENP7	3	cg13535626	4	206267	8.000788218387942	1.6024075727279833e-15
ENSG00000138468	SENP7	3	cg13540795	19	52551618	-7.302311579365312	3.3913023966906823e-13
ENSG00000138468	SENP7	3	cg13551269	19	19977733	-7.768714005859793	9.9906743056951185e-15
ENSG00000138468	SENP7	3	cg13636880	19	58280927	-7.211347958011734	6.584653740479606e-13
ENSG00000138468	SENP7	3	cg13668618	19	58446745	-10.6829966098371	2.7404924186370913e-26
ENSG00000138468	SENP7	3	cg13687570	19	37825320	-9.913726261099574	6.623459075020502e-23
ENSG00000138468	SENP7	3	cg13933427	19	44405818	-7.2367823479702205	5.473943730204083e-13
ENSG00000138468	SENP7	3	cg14025336	19	52900901	-8.81434387589777	1.7591678748431537e-18
ENSG00000138468	SENP7	3	cg14166009	19	37825309	-8.26615039438972	1.8579413158662579e-16
ENSG00000138468	SENP7	3	cg14186187	4	206282	7.573036457447688	4.494333516158588e-14
ENSG00000138468	SENP7	3	cg14239592	19	58715251	9.870967206216779	1.0051388892419707e-22
ENSG00000138468	SENP7	3	cg14256102	19	52511853	-8.394067349782844	6.422783220825534e-17
ENSG00000138468	SENP7	3	cg14283758	4	299370	-11.112284996887942	2.805102354803833e-28
ENSG00000138468	SENP7	3	cg14386312	19	58740861	-8.070781545916898	9.13571574021471e-16
ENSG00000138468	SENP7	3	cg14568105	19	37282931	-10.074565325521032	1.3588789566398125e-23
ENSG00000138468	SENP7	3	cg14582763	19	52956683	-8.02894147313715	1.2789610455134628e-15
ENSG00000138468	SENP7	3	cg14603375	19	57831549	-7.296681594697488	3.5342756457768e-13
ENSG00000138468	SENP7	3	cg14626309	4	299051	-12.972506269367486	9.88496409896256e-38
ENSG00000138468	SENP7	3	cg14713139	19	53811826	-6.791636700149916	1.2710386232334263e-11
ENSG00000138468	SENP7	3	cg14886059	19	58545001	-7.142147534652228	1.0851303287764325e-12
ENSG00000138468	SENP7	3	cg15060012	19	58446783	-16.946000228836784	2.823605136480302e-62
ENSG00000138468	SENP7	3	cg15117681	17	80202426	8.59127476094188	1.2120121733381743e-17
ENSG00000138468	SENP7	3	cg15415136	19	38042418	-8.249955221679308	2.1230599655335823e-16
ENSG00000138468	SENP7	3	cg15439725	4	299311	-6.984398584129086	3.3318870253408466e-12
ENSG00000138468	SENP7	3	cg15746696	19	58400494	-20.021193200949615	4.3602920166977577e-85
ENSG00000138468	SENP7	3	cg15759937	19	58400325	-11.868318407966528	5.858356760432711e-32
ENSG00000138468	SENP7	3	cg15800907	19	52328110	-9.367092792244005	1.2068373945306842e-20
ENSG00000138468	SENP7	3	cg16731240	19	52391250	-8.61277128453888	1.0083472035217732e-17
ENSG00000138468	SENP7	3	cg17114866	19	35222640	-7.018257362717978	2.624088583269157e-12
ENSG00000138468	SENP7	3	cg17271561	19	52839334	-7.592265157553516	3.8831453282126366e-14
ENSG00000138468	SENP7	3	cg17332326	19	37997471	-7.463591932837966	1.025896774678842e-13
ENSG00000138468	SENP7	3	cg17431052	19	37742481	-8.839928080043968	1.405674040749695e-18
ENSG00000138468	SENP7	3	cg17650272	19	52873019	-9.22078026052218	4.638298338619393e-20
ENSG00000138468	SENP7	3	cg17798563	19	58094517	9.60713313426661	1.2697888670752272e-21
ENSG00000138468	SENP7	3	cg17823234	19	38180021	-7.16332598021937	9.317392723663959e-13
ENSG00000138468	SENP7	3	cg18005867	4	206232	10.26937494634811	1.932757698520411e-24
ENSG00000138468	SENP7	3	cg18673377	19	58446898	-20.222446120460933	1.0901445936130617e-86
ENSG00000138468	SENP7	3	cg18860954	19	58400574	-19.42993508115579	1.863341501448346e-80
ENSG00000138468	SENP7	3	cg19311218	19	44952417	-7.627053875819274	2.978157879608025e-14
ENSG00000138468	SENP7	3	cg19355079	19	23253218	-7.275282483867425	4.13377787542822e-13
ENSG00000138468	SENP7	3	cg19375479	19	44952604	-7.047659174296774	2.1307709959280314e-12
ENSG00000138468	SENP7	3	cg19416570	19	58715677	9.756182135349738	3.0540604692470935e-22
ENSG00000138468	SENP7	3	cg19866478	19	52801051	-6.941088823145518	4.5150713992129385e-12
ENSG00000138468	SENP7	3	cg19904905	19	49469667	7.629328842339529	2.9268115201241594e-14
ENSG00000138468	SENP7	3	cg19915738	19	44952730	-8.43314387017162	4.628868280121162e-17
ENSG00000138468	SENP7	3	cg20320494	4	124232	-6.969411473545963	3.702085754533352e-12
ENSG00000138468	SENP7	3	cg20404336	12	133757909	-8.18334759884703	3.665185850096936e-16
ENSG00000138468	SENP7	3	cg20440041	19	37096816	-11.283672069697456	4.298039218633059e-29
ENSG00000138468	SENP7	3	cg21020710	19	58739803	-6.804098709399731	1.166886812449005e-11
ENSG00000138468	SENP7	3	cg21444693	19	58446787	-18.49344282707541	2.3426165462272056e-73
ENSG00000138468	SENP7	3	cg21489303	19	57989182	-13.043620959730717	4.047306907689213e-38
ENSG00000138468	SENP7	3	cg21493505	19	56879418	-6.846153892279322	8.73485754464484e-12
ENSG00000138468	SENP7	3	cg21553182	19	52956821	-8.260346890918965	1.9489623160372578e-16
ENSG00000138468	SENP7	3	cg21759268	19	58446988	-9.758422058292515	2.9888875066684124e-22
ENSG00000138468	SENP7	3	cg21790626	19	58220494	-12.709697123209814	2.578801651174368e-36
ENSG00000138468	SENP7	3	cg21808240	19	36822564	-9.810748483822778	1.8034025430288403e-22
ENSG00000138468	SENP7	3	cg21907914	19	53757677	-6.870573270901247	7.377208059284339e-12
ENSG00000138468	SENP7	3	cg22001557	19	58239424	-10.454790807098307	2.9241519220858556e-25
ENSG00000138468	SENP7	3	cg22022580	19	37266605	-7.235762674720358	5.514701206435449e-13
ENSG00000138468	SENP7	3	cg22331349	19	52391350	-10.955780929031102	1.5198551823483879e-27
ENSG00000138468	SENP7	3	cg22457238	19	58570995	-9.420866562795878	7.321293895310102e-21
ENSG00000138468	SENP7	3	cg22472290	19	52391480	-11.707874363315625	3.693307942731702e-31
ENSG00000138468	SENP7	3	cg22510337	19	58399967	-17.86104524963121	9.940793002380063e-69
ENSG00000138468	SENP7	3	cg22517995	19	37096588	-7.616852505298519	3.219515805382762e-14
ENSG00000138468	SENP7	3	cg22561329	19	57346735	-8.240371549629662	2.297168606396812e-16
ENSG00000138468	SENP7	3	cg22634378	19	37742834	-6.824976556403302	1.0108366936083352e-11
ENSG00000138468	SENP7	3	cg22682154	19	57683164	-6.854577312377989	8.240941131296691e-12
ENSG00000138468	SENP7	3	cg22685966	19	38183418	-8.031858162752574	1.2493805343881913e-15
ENSG00000138468	SENP7	3	cg22720041	19	44952725	-8.628213103285724	8.832859050564698e-18
ENSG00000138468	SENP7	3	cg22720790	19	58716032	8.800321151054318	1.9888057372840603e-18
ENSG00000138468	SENP7	3	cg22797884	19	37800967	-7.529945755316065	6.228386176435902e-14
ENSG00000138468	SENP7	3	cg23010048	19	52391257	-9.937799171869958	5.233386600137793e-23
ENSG00000138468	SENP7	3	cg23029635	19	57904254	7.17168359420237	8.772518508175127e-13
ENSG00000138468	SENP7	3	cg23054584	19	36822311	-8.74850866214773	3.1245304274382843e-18
ENSG00000138468	SENP7	3	cg23372544	19	23387068	7.239211445752689	5.378038109061504e-13
ENSG00000138468	SENP7	3	cg23397578	19	37742925	-7.184869644301261	7.975844438036364e-13
ENSG00000138468	SENP7	3	cg23405218	19	38183456	-8.974078926528945	4.2925549396331353e-19
ENSG00000138468	SENP7	3	cg23448505	19	37826008	-10.75777194742494	1.2486764883252721e-26
ENSG00000138468	SENP7	3	cg23891996	19	9517858	-7.023891894953958	2.5215862861031063e-12
ENSG00000138468	SENP7	3	cg24027100	19	36822549	-14.55781173570158	7.896768497882588e-47
ENSG00000138468	SENP7	3	cg24124798	19	58400275	-9.09640909216587	1.4341796992019988e-19
ENSG00000138468	SENP7	3	cg24189904	19	9473781	-7.685580641088097	1.9009197305147865e-14
ENSG00000138468	SENP7	3	cg24192482	19	58111769	-7.264026051815566	4.4881352738599404e-13
ENSG00000138468	SENP7	3	cg24214260	19	58193221	-15.949980752913966	1.3869760750566804e-55
ENSG00000138468	SENP7	3	cg24368848	19	58545160	-6.963930179667955	3.847317472651938e-12
ENSG00000138468	SENP7	3	cg24413918	19	58516100	-10.311725525759257	1.2590563160950955e-24
ENSG00000138468	SENP7	3	cg24794228	19	52391166	-11.314360621810462	3.0632207865425564e-29
ENSG00000138468	SENP7	3	cg24834889	19	37825406	-12.332154064806296	2.511569017955178e-34
ENSG00000138468	SENP7	3	cg24871714	19	37095466	-7.033323880595251	2.358725143948977e-12
ENSG00000138468	SENP7	3	cg25361961	19	58070048	-17.0975830264079	2.522495885126306e-63
ENSG00000138468	SENP7	3	cg25400396	19	58400559	-22.17642711597791	6.607140774700358e-103
ENSG00000138468	SENP7	3	cg25404914	19	20607771	-8.181830164834345	3.710883045880886e-16
ENSG00000138468	SENP7	3	cg25537993	19	58545182	-10.008034737455763	2.6241104290642383e-23
ENSG00000138468	SENP7	3	cg25772438	19	37329517	-7.605201980075932	3.518753762765015e-14
ENSG00000138468	SENP7	3	cg26263766	19	58739734	-10.339097287029968	9.535996762081037e-25
ENSG00000138468	SENP7	3	cg26356061	19	58446960	-15.960737197060508	1.1794799765563404e-55
ENSG00000138468	SENP7	3	cg26465391	19	58220773	-16.56299276326429	1.1624667046004703e-59
ENSG00000138468	SENP7	3	cg26662727	19	57947642	-8.034892753010793	1.2193199300499797e-15
ENSG00000138468	SENP7	3	cg26671652	19	58446312	-8.115734989801114	6.352726890477807e-16
ENSG00000138468	SENP7	3	cg26698460	19	58716004	8.041952774079139	1.1521139768985452e-15
ENSG00000138468	SENP7	3	cg26713179	19	52772371	-8.727519263895925	3.749328985834282e-18
ENSG00000138468	SENP7	3	cg26734888	19	37825307	-8.970092974774001	4.447619657287428e-19
ENSG00000138468	SENP7	3	cg27046034	19	58280801	-8.616871597334677	9.735293320402668e-18
ENSG00000138468	SENP7	3	cg27049766	19	58220516	-19.142145850439146	3.0403898812383505e-78
ENSG00000138468	SENP7	3	cg27112264	19	58400504	-17.2855066488025	1.2309960215577673e-64
ENSG00000138468	SENP7	3	cg27199827	20	18567975	7.054913531280998	2.0237988603124482e-12
ENSG00000138468	SENP7	3	cg27324426	19	58220837	-18.156151629896407	7.158009134269904e-71
ENSG00000138468	SENP7	3	cg27353143	19	38308057	-8.619136325721131	9.54810022926641e-18
ENSG00000138468	SENP7	3	cg27371091	19	58145084	-7.287775542283736	3.7726233923818903e-13
ENSG00000138468	SENP7	3	cg27389185	19	38042123	-8.011468829294584	1.4711751600125755e-15
ENSG00000138468	SENP7	3	cg27391267	19	58545333	-7.476262427996879	9.329490317447158e-14
ENSG00000114544	SLC41A3	3	cg01886893	5	102089360	-13.53370917780402	7.62031735511308e-41
ENSG00000114544	SLC41A3	3	cg15753593	2	159726728	7.335547280313186	2.6557820235617267e-13
ENSG00000163959	SLC51A	3	cg27137576	6	31922361	-12.662982662373922	4.5946404602740556e-36
ENSG00000181804	SLC9A9	3	cg16899991	3	127868625	-10.536481040166889	1.2589104017920574e-25
ENSG00000114520	SNX4	3	cg02560186	11	3602584	-13.385137794056726	5.219275918226155e-40
ENSG00000114520	SNX4	3	cg15753593	2	159726728	17.007216553384563	1.0644322026734523e-62
ENSG00000144455	SUMF1	3	cg05386570	7	99177695	-7.660155317852381	2.3112195634352016e-14
ENSG00000072274	TFRC	3	cg03360716	7	86596636	-11.614817276695451	1.0663970141730532e-30
ENSG00000072274	TFRC	3	cg27137576	6	31922361	-7.357392752361485	2.2617482592266473e-13
ENSG00000144560	VGLL4	3	cg17076431	6	49901607	16.387685062702314	1.7501399499936284e-58
ENSG00000177311	ZBTB38	3	cg00685614	16	89118838	7.902967194487252	3.4869865189193443e-15
ENSG00000177311	ZBTB38	3	cg00926657	17	79880822	7.716337499679705	1.4993768689020998e-14
ENSG00000177311	ZBTB38	3	cg00994936	19	1423902	7.934703271217428	2.7121673966718417e-15
ENSG00000177311	ZBTB38	3	cg01561259	17	78560781	7.840499137117072	5.702481975864491e-15
ENSG00000177311	ZBTB38	3	cg02470690	6	27839548	9.823678990081785	1.5908955386565767e-22
ENSG00000177311	ZBTB38	3	cg03569283	8	142222314	7.362703167021534	2.173483472004497e-13
ENSG00000177311	ZBTB38	3	cg03711457	11	113746831	8.227089471651142	2.561773180058846e-16
ENSG00000177311	ZBTB38	3	cg04486919	7	2117171	8.655979550907404	6.956840040637692e-18
ENSG00000177311	ZBTB38	3	cg04519550	16	89349466	7.005767846320345	2.8659793633746113e-12
ENSG00000177311	ZBTB38	3	cg04890576	17	73032613	6.796681092920032	1.2277847403980986e-11
ENSG00000177311	ZBTB38	3	cg05350293	16	89119002	7.78141437272147	9.049858803926049e-15
ENSG00000177311	ZBTB38	3	cg06008435	6	25027714	10.258191698932238	2.1633971501964624e-24
ENSG00000177311	ZBTB38	3	cg07173823	1	45190519	7.103595406378423	1.4304616352784252e-12
ENSG00000177311	ZBTB38	3	cg07675998	11	64268315	11.749780510368055	2.2877093982304647e-31
ENSG00000177311	ZBTB38	3	cg07721547	22	42475119	7.397826061984301	1.675374337489261e-13
ENSG00000177311	ZBTB38	3	cg08040471	17	80407779	6.942238642402657	4.478730288752109e-12
ENSG00000177311	ZBTB38	3	cg08362283	16	89119663	7.204115269965846	6.93875516769333e-13
ENSG00000177311	ZBTB38	3	cg09658497	7	2847517	6.919624700782321	5.245286288889602e-12
ENSG00000177311	ZBTB38	3	cg09697999	7	733198	7.89977174519861	3.5761520649149466e-15
ENSG00000177311	ZBTB38	3	cg09780964	16	89119135	7.222967143136689	6.051940473304405e-13
ENSG00000177311	ZBTB38	3	cg09929238	17	78560916	6.879896965799663	6.915133658859719e-12
ENSG00000177311	ZBTB38	3	cg10975863	14	68830704	9.318275679307792	1.8951545672300926e-20
ENSG00000177311	ZBTB38	3	cg11382082	5	43038611	7.280140214493336	3.9893067390710507e-13
ENSG00000177311	ZBTB38	3	cg12144681	8	142220329	9.009359756267953	3.1331265555869836e-19
ENSG00000177311	ZBTB38	3	cg13803234	14	68830813	7.685948214383281	1.8954446639115083e-14
ENSG00000177311	ZBTB38	3	cg14004921	9	140023416	8.093226169820376	7.621457616630397e-16
ENSG00000177311	ZBTB38	3	cg14185922	9	130615188	7.518428678725614	6.793612087451395e-14
ENSG00000177311	ZBTB38	3	cg14398883	7	101398184	9.470904400386011	4.586801077532219e-21
ENSG00000177311	ZBTB38	3	cg14823389	7	101398152	9.316828636310348	1.9206191531681187e-20
ENSG00000177311	ZBTB38	3	cg16337457	17	76989680	7.957333372237247	2.2659235781584564e-15
ENSG00000177311	ZBTB38	3	cg16815625	8	141229477	8.110732343981217	6.615010588913825e-16
ENSG00000177311	ZBTB38	3	cg18034295	22	42475135	8.016130332551798	1.4171833735906026e-15
ENSG00000177311	ZBTB38	3	cg18094999	11	113746795	9.576405642164108	1.6988290555582397e-21
ENSG00000177311	ZBTB38	3	cg18446336	7	2847575	7.92951061177206	2.8261882833642336e-15
ENSG00000177311	ZBTB38	3	cg18576206	22	44392384	7.890279736613462	3.854471038863511e-15
ENSG00000177311	ZBTB38	3	cg19338056	9	14992172	11.56090860157682	1.9542164908294625e-30
ENSG00000177311	ZBTB38	3	cg19717773	7	2847554	7.611000512248788	3.3663746294921184e-14
ENSG00000177311	ZBTB38	3	cg21771528	5	18745861	14.576043145251122	6.124718273185469e-47
ENSG00000177311	ZBTB38	3	cg21806580	5	18746010	16.882672546026903	7.694165771578233e-62
ENSG00000177311	ZBTB38	3	cg22114489	7	101398177	9.77522290606803	2.541667312385555e-22
ENSG00000177311	ZBTB38	3	cg22488164	12	14716910	7.856582752890224	5.0259391249326044e-15
ENSG00000177311	ZBTB38	3	cg24994319	6	25027586	9.07695370667846	1.7087681008695877e-19
ENSG00000177311	ZBTB38	3	cg25355213	17	73780246	6.837173561209009	9.293066135024115e-12
ENSG00000177311	ZBTB38	3	cg26066277	17	79792777	8.77433126413425	2.4951776635509757e-18
ENSG00000177311	ZBTB38	3	cg26332052	17	73780035	7.290549823359196	3.6965678309968427e-13
ENSG00000177311	ZBTB38	3	cg26547058	8	142243143	6.90123689205834	5.962190205720809e-12
ENSG00000177311	ZBTB38	3	cg26824091	6	38670437	8.725181643721523	3.8257876459306624e-18
ENSG00000177311	ZBTB38	3	cg27381584	17	80407749	7.87887819698828	4.217090311991633e-15
ENSG00000177311	ZBTB38	3	cg27478579	2	55497012	9.344692717810185	1.4848212771798784e-20
ENSG00000172667	ZMAT3	3	cg03818034	7	99746088	-7.221973781031587	6.09549539124317e-13
ENSG00000186448	ZNF197	3	cg00981877	20	50366841	7.2436082270285675	5.209751696229573e-13
ENSG00000186448	ZNF197	3	cg26675329	2	103033753	7.346418442769569	2.451980759749644e-13
ENSG00000169981	ZNF35	3	cg17586885	6	166259959	9.09930450725743	1.397945264122838e-19
ENSG00000169981	ZNF35	3	cg20418529	6	166260012	9.189669968939603	6.163273406878467e-20
ENSG00000177873	ZNF619	3	cg01882498	4	83934956	7.1820890637112305	8.135321378259879e-13
ENSG00000227124	ZNF717	3	cg03844506	4	4109441	8.824948705737146	1.601742929045743e-18
ENSG00000070476	ZXDC	3	cg21035471	17	77005669	-8.849682804378428	1.289872354938153e-18
ENSG00000196526	AFAP1	4	cg05984533	17	79479583	-10.305397828146152	1.3422292044982306e-24
ENSG00000196526	AFAP1	4	cg10052190	16	22019676	-12.119383844714207	3.135470835686594e-33
ENSG00000145354	CISD2	4	cg16471864	4	38666270	-8.483697768890417	3.02312442976114e-17
ENSG00000145476	CYP4V2	4	cg07700062	1	236767390	-39.71080457097985	2.122949506886674e-291
ENSG00000109381	ELF2	4	cg00691240	1	52498502	9.620326152067099	1.1198060554348893e-21
ENSG00000109381	ELF2	4	cg07977202	11	66311348	-6.85708092996298	8.098642711739058e-12
ENSG00000109381	ELF2	4	cg08855861	1	52498679	8.75516431649014	2.9479866442002256e-18
ENSG00000109381	ELF2	4	cg15758008	5	4866318	8.276984226206208	1.6987325928750583e-16
ENSG00000109381	ELF2	4	cg19603903	19	57742345	6.998118645490337	3.024630110383939e-12
ENSG00000109381	ELF2	4	cg19841649	5	4866322	8.426771795428676	4.882155029475542e-17
ENSG00000109381	ELF2	4	cg22711741	19	57742444	7.869689337442871	4.53307123441306e-15
ENSG00000109381	ELF2	4	cg25592564	5	4866442	7.531675898879282	6.14659765492043e-14
ENSG00000171503	ETFDH	4	cg16792258	2	239631449	8.594628346919288	1.1774575331115481e-17
ENSG00000163322	FAM175A	4	cg13633941	7	26284736	-7.3436182390183244	2.502590559904654e-13
ENSG00000109536	FRG1	4	cg03435771	12	38595601	8.687502359440272	5.29729486900603e-18
ENSG00000109536	FRG1	4	cg05369274	7	55639575	9.220049861508313	4.664701725015625e-20
ENSG00000109536	FRG1	4	cg07070341	4	121844174	11.993545157204771	1.3661810876352294e-32
ENSG00000109536	FRG1	4	cg12894917	11	9286517	-7.183931602226207	8.027071015591218e-13
ENSG00000109536	FRG1	4	cg20027314	12	108258022	-6.853862871546039	8.27915425326692e-12
ENSG00000109536	FRG1	4	cg25456927	18	12308339	-10.448580270932302	3.111639765952515e-25
ENSG00000198189	HSD17B11	4	cg00130528	2	175189039	10.463670361953081	2.669188645116264e-25
ENSG00000127415	IDUA	4	cg15457005	11	11643754	-11.92029764119354	3.226053383100514e-32
ENSG00000127415	IDUA	4	cg17687970	8	22462467	-7.329571536655796	2.777564189079422e-13
ENSG00000127415	IDUA	4	cg20822818	11	119235062	-8.773817533994468	2.5102863109698435e-18
ENSG00000169429	IL8	4	cg23097035	7	28396164	-8.856126758782557	1.2188243752570295e-18
ENSG00000164344	KLKB1	4	cg07700062	1	236767390	16.12093242563002	1.0378652617296406e-56
ENSG00000164024	METAP1	4	cg12403253	6	26598502	15.068812967089395	5.8270543940003205e-50
ENSG00000145388	METTL14	4	cg24350395	1	243288625	-13.33138326922294	1.0411051971128411e-39
ENSG00000145388	METTL14	4	cg26518628	1	97050305	22.072184815477183	5.122316772474734e-102
ENSG00000215375	MYL5	4	cg11105585	21	45759228	8.404781997135325	5.877390647021907e-17
ENSG00000215375	MYL5	4	cg19759883	12	14956454	7.862836776005047	4.788494134282741e-15
ENSG00000215375	MYL5	4	cg27438889	10	123922704	8.917645675256175	7.092949997933837e-19
ENSG00000109320	NFKB1	4	cg00331027	5	80521615	-8.860800203667045	1.1698406038497697e-18
ENSG00000109320	NFKB1	4	cg00499237	2	97169033	-23.800372334596045	2.8714412870972463e-117
ENSG00000109320	NFKB1	4	cg00580497	5	1153746	-9.302037640211005	2.200865413207283e-20
ENSG00000109320	NFKB1	4	cg00730373	16	89050488	-11.202365359368256	1.0495145377844132e-28
ENSG00000109320	NFKB1	4	cg01020263	16	50732073	-9.295311193899837	2.3414644678609037e-20
ENSG00000109320	NFKB1	4	cg01037823	16	2879998	-7.731787367003081	1.3304137762799856e-14
ENSG00000109320	NFKB1	4	cg01127300	22	38614796	-11.073463656978928	4.272532913123434e-28
ENSG00000109320	NFKB1	4	cg01156844	15	85520317	-9.128540012923418	1.0726430620954405e-19
ENSG00000109320	NFKB1	4	cg01243823	16	50732212	-7.730970435152348	1.3388547370610357e-14
ENSG00000109320	NFKB1	4	cg01426713	6	106517533	-7.236648834312506	5.478791536509001e-13
ENSG00000109320	NFKB1	4	cg01476795	10	82362879	-8.260739239164078	1.9423922958161603e-16
ENSG00000109320	NFKB1	4	cg02086820	16	88698611	-6.967665622875034	3.747471478828281e-12
ENSG00000109320	NFKB1	4	cg02097120	1	154492952	-7.6958876259138655	1.755630453625942e-14
ENSG00000109320	NFKB1	4	cg02222791	14	88621424	-7.979144443919251	1.9044715903869628e-15
ENSG00000109320	NFKB1	4	cg02240252	17	47931591	-11.003596931641548	9.087027214412996e-28
ENSG00000109320	NFKB1	4	cg02371935	16	87521363	7.003983920740752	2.9021743125061005e-12
ENSG00000109320	NFKB1	4	cg02387843	4	9892887	-9.224207503737018	4.494326229400799e-20
ENSG00000109320	NFKB1	4	cg02539664	3	9025584	-8.015163694574307	1.428105998318428e-15
ENSG00000109320	NFKB1	4	cg02558476	16	2880326	-7.222671062177199	6.064708382684635e-13
ENSG00000109320	NFKB1	4	cg02867514	17	34207341	-7.566219516914847	4.7324924259548034e-14
ENSG00000109320	NFKB1	4	cg03052004	6	11702389	-12.379983741215597	1.4149868512876678e-34
ENSG00000109320	NFKB1	4	cg03055671	3	172231528	-9.83253763826778	1.4597519032792337e-22
ENSG00000109320	NFKB1	4	cg03078551	17	41656298	-7.950240113315252	2.3972409375165705e-15
ENSG00000109320	NFKB1	4	cg03113867	11	129920411	-11.083612309330773	3.8275392119005874e-28
ENSG00000109320	NFKB1	4	cg03155159	16	59627519	-8.307082764073778	1.3245759705429233e-16
ENSG00000109320	NFKB1	4	cg03292675	8	21912864	-11.155361029979211	1.7541706105942667e-28
ENSG00000109320	NFKB1	4	cg03502889	11	34255733	-12.5508343742206	1.7968016983568905e-35
ENSG00000109320	NFKB1	4	cg03796224	8	30383628	-6.827224517098823	9.952389782606486e-12
ENSG00000109320	NFKB1	4	cg03889450	4	10082415	-14.458220232513293	3.133648533456251e-46
ENSG00000109320	NFKB1	4	cg03929796	3	52231840	-18.204792932196888	3.1438233524128862e-71
ENSG00000109320	NFKB1	4	cg03957124	6	37016869	-7.184335438729155	8.006022446039812e-13
ENSG00000109320	NFKB1	4	cg04011474	2	28904455	-7.58636882905803	4.060887047635068e-14
ENSG00000109320	NFKB1	4	cg04091113	16	85576555	-9.756090776846067	3.0559045959101603e-22
ENSG00000109320	NFKB1	4	cg04163119	6	41754006	-8.839445959810492	1.4113715140036877e-18
ENSG00000109320	NFKB1	4	cg04211179	1	16301562	-8.476395617110262	3.215399896770485e-17
ENSG00000109320	NFKB1	4	cg04333296	17	58180418	-7.6191612998623945	3.162927106470019e-14
ENSG00000109320	NFKB1	4	cg05055712	16	2880431	-9.747578417438998	3.3168278514854945e-22
ENSG00000109320	NFKB1	4	cg05146922	2	10634174	-10.536862891930076	1.2544139878957933e-25
ENSG00000109320	NFKB1	4	cg05376738	1	212923780	-10.161053018997446	5.739442749336706e-24
ENSG00000109320	NFKB1	4	cg05405914	16	8972233	-16.857570889909603	1.1429916609303337e-61
ENSG00000109320	NFKB1	4	cg05436939	4	1202599	-7.320653848488816	2.9635298530045016e-13
ENSG00000109320	NFKB1	4	cg05503062	15	90324339	-15.129994106144286	2.41964671121541e-50
ENSG00000109320	NFKB1	4	cg05627365	15	81453408	-7.739880771424894	1.2495682334341024e-14
ENSG00000109320	NFKB1	4	cg05839709	11	109962727	9.515074144466233	3.0297277877531428e-21
ENSG00000109320	NFKB1	4	cg06169746	3	119419493	-10.51818623578235	1.5215388506474783e-25
ENSG00000109320	NFKB1	4	cg06178669	11	63334608	-13.138670904721126	1.2174380149834485e-38
ENSG00000109320	NFKB1	4	cg06514003	17	40330907	-6.887262364603364	6.570231714121818e-12
ENSG00000109320	NFKB1	4	cg06619077	1	47656003	-8.840489888122109	1.3984942742939351e-18
ENSG00000109320	NFKB1	4	cg06764092	1	159796658	-6.955893170877586	4.0701192458350806e-12
ENSG00000109320	NFKB1	4	cg06792126	15	90365488	-9.74492830604263	3.4024749451181207e-22
ENSG00000109320	NFKB1	4	cg06865845	17	72608711	-8.986675401810325	3.8360306312028254e-19
ENSG00000109320	NFKB1	4	cg06891043	17	7186718	-8.454129577361542	3.879331807070268e-17
ENSG00000109320	NFKB1	4	cg07026433	7	129781152	-10.032837485626366	2.0535602502866398e-23
ENSG00000109320	NFKB1	4	cg07037944	15	64290807	-17.088392695181106	2.9148192170298806e-63
ENSG00000109320	NFKB1	4	cg07072405	12	105839243	-8.91447179102287	7.285076942899884e-19
ENSG00000109320	NFKB1	4	cg07136133	11	36422377	-6.915745338479785	5.388935759182119e-12
ENSG00000109320	NFKB1	4	cg07285708	3	10291324	-10.872865556703548	3.6855772252329985e-27
ENSG00000109320	NFKB1	4	cg07352859	16	89050672	-7.5802255956268665	4.255043013697108e-14
ENSG00000109320	NFKB1	4	cg08036172	3	127473609	-7.94893587394019	2.422217165000859e-15
ENSG00000109320	NFKB1	4	cg08289056	10	6233666	-8.792893959363981	2.121792164327118e-18
ENSG00000109320	NFKB1	4	cg08548559	22	31686097	-12.484499853227694	4.016164722640713e-35
ENSG00000109320	NFKB1	4	cg08575688	2	228678500	-9.854292014336355	1.1818024500335781e-22
ENSG00000109320	NFKB1	4	cg08656816	17	34207454	-6.917596373789074	5.3198269099085706e-12
ENSG00000109320	NFKB1	4	cg09043456	17	79024087	-8.28320455198177	1.6138027336607956e-16
ENSG00000109320	NFKB1	4	cg09275408	10	44500491	-15.328529428493292	1.370189579951473e-51
ENSG00000109320	NFKB1	4	cg09316140	8	21912474	-7.417645407358409	1.4457020922281392e-13
ENSG00000109320	NFKB1	4	cg09701700	10	104194843	-7.295568719593285	3.562913248698188e-13
ENSG00000109320	NFKB1	4	cg09865015	4	1202509	-10.004190182267708	2.7246537947366186e-23
ENSG00000109320	NFKB1	4	cg10005565	2	235578952	-9.821769295482659	1.6203809407653518e-22
ENSG00000109320	NFKB1	4	cg10045881	1	111770291	-8.026438855546811	1.304723166961607e-15
ENSG00000109320	NFKB1	4	cg10315334	17	34207332	-8.414111468109361	5.4295990846677695e-17
ENSG00000109320	NFKB1	4	cg10521450	10	105439280	-10.714187358686061	1.9748155727377893e-26
ENSG00000109320	NFKB1	4	cg10691866	7	65817282	-7.332732656010556	2.711428994674402e-13
ENSG00000109320	NFKB1	4	cg10929758	2	54857270	-7.358578975374518	2.2406658706148e-13
ENSG00000109320	NFKB1	4	cg11012543	3	52231691	-19.791963084529023	2.795905030547425e-83
ENSG00000109320	NFKB1	4	cg11152384	11	68934300	-17.470950821638215	6.065101077929131e-66
ENSG00000109320	NFKB1	4	cg11715092	21	47705294	7.775249224791112	9.49432353352079e-15
ENSG00000109320	NFKB1	4	cg11739399	1	206669785	-8.92367144036355	6.715219566084515e-19
ENSG00000109320	NFKB1	4	cg11823034	2	218858970	-7.480892017043605	9.010075519568486e-14
ENSG00000109320	NFKB1	4	cg11827101	2	8468422	-14.878727866168461	8.735607007663793e-49
ENSG00000109320	NFKB1	4	cg11998932	7	3901843	-8.532152399871793	2.0054477662226378e-17
ENSG00000109320	NFKB1	4	cg12226095	4	27057954	-11.827431781816115	9.380968003486899e-32
ENSG00000109320	NFKB1	4	cg12352038	20	62114621	-7.615773881414769	3.245792410818588e-14
ENSG00000109320	NFKB1	4	cg12428160	10	44500693	-15.218932514459008	6.713010099593286e-51
ENSG00000109320	NFKB1	4	cg12547807	1	9473751	-7.580382204739128	4.249981816597727e-14
ENSG00000109320	NFKB1	4	cg14069673	2	62385108	-9.060614656115735	1.979027304391097e-19
ENSG00000109320	NFKB1	4	cg14093127	2	8714417	-7.5470862970504005	5.470830367766295e-14
ENSG00000109320	NFKB1	4	cg14437551	6	31539986	-7.157340552395712	9.727092644294717e-13
ENSG00000109320	NFKB1	4	cg14622819	4	76944817	-7.113630977529195	1.3313029556166398e-12
ENSG00000109320	NFKB1	4	cg15797834	19	4338932	-7.285813003947658	3.8268931906126676e-13
ENSG00000109320	NFKB1	4	cg15946653	11	113258444	-7.330693674357706	2.7524550327688275e-13
ENSG00000109320	NFKB1	4	cg15947301	17	3462082	-15.287298748745933	2.4941619228449424e-51
ENSG00000109320	NFKB1	4	cg15958828	3	71598380	-7.356865071143577	2.26922498185988e-13
ENSG00000109320	NFKB1	4	cg16551670	5	106637856	-10.663807253257309	3.3489576153699323e-26
ENSG00000109320	NFKB1	4	cg16914953	7	100798809	-8.181819453451048	3.710691822044026e-16
ENSG00000109320	NFKB1	4	cg16949914	10	6104515	-9.917107918872821	6.406194225127918e-23
ENSG00000109320	NFKB1	4	cg16983541	3	52231347	-14.232263433697087	6.947676102435197e-45
ENSG00000109320	NFKB1	4	cg17215278	1	117114263	-7.5397916592372685	5.781211883544914e-14
ENSG00000109320	NFKB1	4	cg17341765	12	65997206	-7.2936438742791045	3.6135401242762545e-13
ENSG00000109320	NFKB1	4	cg17467525	1	9686523	-6.89203685123835	6.355871230690401e-12
ENSG00000109320	NFKB1	4	cg17578639	3	176862949	-8.968568519296399	4.507481353681616e-19
ENSG00000109320	NFKB1	4	cg18372930	5	137939469	-10.444452710527713	3.2503704666795304e-25
ENSG00000109320	NFKB1	4	cg18643093	5	150521257	-7.191359728465483	7.609619679523082e-13
ENSG00000109320	NFKB1	4	cg18728264	11	118766491	-8.081929529556131	8.348980390045132e-16
ENSG00000109320	NFKB1	4	cg18764008	5	151101114	-7.09441962605225	1.5273306430339622e-12
ENSG00000109320	NFKB1	4	cg19131667	3	17236940	-12.579429840546606	1.2688144174258364e-35
ENSG00000109320	NFKB1	4	cg19199805	4	27058111	-7.956448394466281	2.281787489500019e-15
ENSG00000109320	NFKB1	4	cg19268652	6	12119552	-8.198759672332615	3.2309207404519166e-16
ENSG00000109320	NFKB1	4	cg19313311	7	74058031	-10.24964276348956	2.3578284431679964e-24
ENSG00000109320	NFKB1	4	cg19616339	2	69164114	-7.565278229060851	4.766405729168414e-14
ENSG00000109320	NFKB1	4	cg19661705	15	31307115	-7.7333451057085645	1.3144633329018712e-14
ENSG00000109320	NFKB1	4	cg19893929	2	16105823	-10.249789303075232	2.354347295312726e-24
ENSG00000109320	NFKB1	4	cg19920134	7	38227870	-9.949399959443243	4.66950869724969e-23
ENSG00000109320	NFKB1	4	cg20607293	1	147112703	-9.981123443985734	3.419437819750336e-23
ENSG00000109320	NFKB1	4	cg20774552	11	46415316	-15.70932874028197	5.070124181838356e-54
ENSG00000109320	NFKB1	4	cg21141329	17	48290459	-13.4035654855145	4.115444910892893e-40
ENSG00000109320	NFKB1	4	cg21216471	17	4644276	-7.277033346942947	4.080829149043851e-13
ENSG00000109320	NFKB1	4	cg21529807	19	42134478	-16.336365589033427	3.8653817538304294e-58
ENSG00000109320	NFKB1	4	cg21695395	11	128364143	-8.073448686880932	8.94019182874914e-16
ENSG00000109320	NFKB1	4	cg22242842	2	85167149	-10.943024404441438	1.7418298798034726e-27
ENSG00000109320	NFKB1	4	cg22322277	6	75459158	-20.015295013374335	4.834709771120944e-85
ENSG00000109320	NFKB1	4	cg22514722	3	127473755	-7.977993496913837	1.9220311920218576e-15
ENSG00000109320	NFKB1	4	cg22579075	7	94250352	-7.072189544960227	1.7896745820549974e-12
ENSG00000109320	NFKB1	4	cg22870429	3	114027859	-14.188145371381525	1.2658807000170496e-44
ENSG00000109320	NFKB1	4	cg23045716	4	1201881	-9.31874150934228	1.8868105701446392e-20
ENSG00000109320	NFKB1	4	cg23681974	3	126734092	-6.899746725526803	6.024112222212189e-12
ENSG00000109320	NFKB1	4	cg23786580	7	43204506	-13.03835577211762	4.3209047790537287e-38
ENSG00000109320	NFKB1	4	cg23813257	16	3115286	-9.61212671421964	1.2106792547883684e-21
ENSG00000109320	NFKB1	4	cg24088496	11	96071506	-8.375347169332521	7.509024534385141e-17
ENSG00000109320	NFKB1	4	cg24163658	3	58182370	-12.01233248736886	1.0996150133283222e-32
ENSG00000109320	NFKB1	4	cg24174557	17	57903544	-7.828977294568134	6.241143618745709e-15
ENSG00000109320	NFKB1	4	cg24587080	6	160016373	-9.907463581151402	7.039372755335139e-23
ENSG00000109320	NFKB1	4	cg24957609	12	27125095	-16.924466480242167	3.964250161948595e-62
ENSG00000109320	NFKB1	4	cg25073708	9	132083538	-7.939817652553707	2.6041374370097113e-15
ENSG00000109320	NFKB1	4	cg25123427	3	39054994	-17.880014889719845	7.233405403065323e-69
ENSG00000109320	NFKB1	4	cg25141611	13	113422162	-7.292174454380631	3.6526635593166616e-13
ENSG00000109320	NFKB1	4	cg25762679	1	101185311	-9.393316208919309	9.458847850102382e-21
ENSG00000109320	NFKB1	4	cg25897251	12	53509460	-8.618260317100312	9.618444914168612e-18
ENSG00000109320	NFKB1	4	cg26259865	16	2880359	-7.213891810947372	6.463732283421772e-13
ENSG00000109320	NFKB1	4	cg26543539	1	156907349	-7.9031188111026225	3.482599290073958e-15
ENSG00000109320	NFKB1	4	cg26708797	5	170906387	-7.572018571175696	4.528734905109941e-14
ENSG00000109320	NFKB1	4	cg27250032	10	5544140	-8.933666878594549	6.145929833885748e-19
ENSG00000170502	NUDT9	4	cg26560020	1	952794	-9.871718862239993	9.978106316349931e-23
ENSG00000185619	PCGF3	4	cg11586658	5	131563581	19.487338131958804	6.869261640731786e-81
ENSG00000185619	PCGF3	4	cg11951449	1	116519025	-13.173184880521328	7.910158697556401e-39
ENSG00000169299	PGM2	4	cg04038500	8	12570225	10.27461894218809	1.8320974298827415e-24
ENSG00000174227	PIGG	4	cg19764325	22	32340710	9.361123212304063	1.2769836957311506e-20
ENSG00000138670	RASGEF1B	4	cg09480837	10	95789501	15.08592709571784	4.549186029067187e-50
ENSG00000159788	RGS12	4	cg06795816	11	71791709	11.255126110191759	5.895154714240108e-29
ENSG00000145423	SFRP2	4	cg05894734	4	40859249	-10.020658782882196	2.3157306871809427e-23
ENSG00000163069	SGCB	4	cg11122456	11	40612873	-23.718353319733726	1.5590837913302504e-116
ENSG00000145217	SLC26A1	4	cg09821533	6	13712174	7.104104923405281	1.4262355313129488e-12
ENSG00000145217	SLC26A1	4	cg13631105	18	29599349	-14.339842164516188	1.6154495870085258e-45
ENSG00000145217	SLC26A1	4	cg15457005	11	11643754	8.504218024109717	2.5451940394945318e-17
ENSG00000145217	SLC26A1	4	cg20822818	11	119235062	10.837846133399754	5.368864909854447e-27
ENSG00000145217	SLC26A1	4	cg21249729	9	138392748	10.917827407158384	2.289857281200666e-27
ENSG00000170365	SMAD1	4	cg03172717	10	51565268	-7.490936920252212	8.353687271076846e-14
ENSG00000269893	SNHG8	4	cg01044331	12	2904352	14.333371756967075	1.742548668113631e-45
ENSG00000269893	SNHG8	4	cg24350395	1	243288625	8.214093346520702	2.849098844662108e-16
ENSG00000269893	SNHG8	4	cg26518628	1	97050305	12.561655907077967	1.5735292217141805e-35
ENSG00000168818	STX18	4	cg02670466	3	47020191	-11.03147871867446	6.727627474524719e-28
ENSG00000168818	STX18	4	cg04640216	11	63439065	12.23373762074591	8.109797748294326e-34
ENSG00000173011	TADA2B	4	cg07817883	1	32538562	-35.193412459616	8.311452660968338e-237
ENSG00000169762	TAPT1	4	cg00140479	22	21356515	-7.08292523973012	1.6578164436333347e-12
ENSG00000169762	TAPT1	4	cg00152757	7	65939507	33.8240645881992	5.396205580081152e-221
ENSG00000169762	TAPT1	4	cg02526508	11	58494370	12.472763618779908	4.626811059889766e-35
ENSG00000132406	TMEM128	4	cg00661438	3	75661320	8.192191096709815	3.4092201855170616e-16
ENSG00000127419	TMEM175	4	cg01799862	16	67143802	-12.13075991837432	2.756548624138125e-33
ENSG00000127419	TMEM175	4	cg15457005	11	11643754	-20.064771448551774	2.0331233670170765e-85
ENSG00000127419	TMEM175	4	cg17687970	8	22462467	-11.597465675032595	1.2990757576974755e-30
ENSG00000127419	TMEM175	4	cg20693608	4	113152836	-12.112078685363473	3.4345738776738684e-33
ENSG00000127419	TMEM175	4	cg20822818	11	119235062	-9.297741148341194	2.294150637738249e-20
ENSG00000033178	UBA6	4	cg20354485	8	134471026	-12.494617486798889	3.546983717720253e-35
ENSG00000071127	WDR1	4	cg15882809	6	26285828	-23.272168187009076	1.603541325681042e-112
ENSG00000071127	WDR1	4	cg26043149	18	55253948	-35.99219591208038	2.7752417809716654e-246
ENSG00000109501	WFS1	4	cg22924550	3	117890213	8.300203515062986	1.4025151958038912e-16
ENSG00000250312	ZNF718	4	cg02664162	19	49469375	15.38369828895408	6.168512384367733e-52
ENSG00000250312	ZNF718	4	cg03720617	16	47527034	24.02772773755383	2.5102573983624987e-119
ENSG00000250312	ZNF718	4	cg11777498	6	89673741	27.092866146204273	1.242875212841799e-148
ENSG00000250312	ZNF718	4	cg14076411	6	89673710	9.542727342524422	2.337034933980437e-21
ENSG00000250312	ZNF718	4	cg15117681	17	80202426	10.83992404098287	5.239627892315196e-27
ENSG00000250312	ZNF718	4	cg15571405	7	130796167	11.65705134618304	6.595155659638573e-31
ENSG00000250312	ZNF718	4	cg16920502	8	133141439	8.226714957136045	2.5707558898487513e-16
ENSG00000250312	ZNF718	4	cg19904905	19	49469667	15.225885777400004	6.104067199914845e-51
ENSG00000250312	ZNF718	4	cg22027879	19	49469965	10.068921797335136	1.4382428237876534e-23
ENSG00000250312	ZNF718	4	cg22672060	4	156464550	18.464530634144847	3.8702284224554044e-73
ENSG00000250312	ZNF718	4	cg22876092	10	88126287	7.636057546125563	2.7807270228112443e-14
ENSG00000182903	ZNF721	4	cg03720617	16	47527034	7.015475414335299	2.677218484842892e-12
ENSG00000182903	ZNF721	4	cg11777498	6	89673741	7.15915938149399	9.60528910101387e-13
ENSG00000182903	ZNF721	4	cg19904905	19	49469667	7.082681034154152	1.6615629243405578e-12
ENSG00000113273	ARSB	5	cg25496680	19	16604089	-8.771727442258305	2.5524641646007077e-18
ENSG00000145781	COMMD10	5	cg20768342	1	85483948	13.451816433075786	2.207072815582661e-40
ENSG00000169570	DTWD2	5	cg06896619	17	61851486	-7.243081164702854	5.22729780961049e-13
ENSG00000170571	EMB	5	cg25512188	6	167093321	12.310772786193164	3.233986009791375e-34
ENSG00000131187	F12	5	cg22159557	15	65067668	-9.098811216275124	1.4053674627182874e-19
ENSG00000173221	GLRX	5	cg26853442	5	161178531	-14.30916140256793	2.4290444443363232e-45
ENSG00000113161	HMGCR	5	cg21683619	1	66070348	8.593641213310512	1.1876381087231257e-17
ENSG00000145495	MARCH6	5	cg02301754	1	151149370	-9.833727716846644	1.4423822061649717e-22
ENSG00000171444	MCC	5	cg05541779	15	45943467	15.295908214015645	2.1994414554513918e-51
ENSG00000171421	MRPL36	5	cg01509141	13	44453359	10.038541408223942	1.9406629745136632e-23
ENSG00000171421	MRPL36	5	cg05226967	18	55102913	12.1759802872079	1.6071504090714178e-33
ENSG00000171421	MRPL36	5	cg06437144	17	45973627	11.484746296551933	4.5969103479009814e-30
ENSG00000171421	MRPL36	5	cg10355989	2	9143982	12.695081906182638	3.082573294593264e-36
ENSG00000112996	MRPS30	5	cg25512188	6	167093321	14.513364567405878	1.4547464244227861e-46
ENSG00000152620	NADK2	5	cg14349131	9	14287483	-7.313229490224498	3.129348331498418e-13
ENSG00000134986	NREP	5	cg07573936	15	55805566	7.072884806259971	1.7809770249947023e-12
ENSG00000164346	NSA2	5	cg07967114	12	94915694	-16.120999218347546	1.0418146157418724e-56
ENSG00000249915	PDCD6	5	cg02377073	8	48920860	-7.1462058146953575	1.054063089910596e-12
ENSG00000145632	PLK2	5	cg08447792	4	110600020	6.975952290540815	3.534883304006325e-12
ENSG00000145725	PPIP5K2	5	cg07451297	17	7486874	8.00100300635042	1.5990475403668997e-15
ENSG00000145725	PPIP5K2	5	cg09663193	17	7486821	9.525824801172622	2.736800296569646e-21
ENSG00000145725	PPIP5K2	5	cg13546736	17	7486858	6.894452265810161	6.249162891193961e-12
ENSG00000129625	REEP5	5	cg24385666	4	2278261	8.55638973992796	1.6319040056075894e-17
ENSG00000073578	SDHA	5	cg19571293	19	1028488	7.690407585978062	1.831755830141668e-14
ENSG00000039123	SKIV2L2	5	cg07387335	15	34781891	-36.14235634918339	5.129252349898062e-248
ENSG00000064651	SLC12A2	5	cg16011800	17	1958478	-11.764534926002447	1.9299522479561782e-31
ENSG00000113504	SLC12A7	5	cg04701034	14	52536175	-12.322436482584704	2.8268204396837933e-34
ENSG00000113504	SLC12A7	5	cg10495084	15	96889416	-9.414780876817476	7.753986783858309e-21
ENSG00000152582	SPEF2	5	cg04521224	2	37332584	13.426187412062271	3.0685958405471878e-40
ENSG00000164296	TIGD6	5	cg15241499	18	76635712	-8.615857983775799	9.822751760154732e-18
ENSG00000174695	TMEM167A	5	cg00774769	1	194400632	21.796040826410998	1.153107495053411e-99
ENSG00000174695	TMEM167A	5	cg06759901	7	126446757	-10.760081470596086	1.2171516116766823e-26
ENSG00000172262	ZNF131	5	cg01111041	6	32121055	-7.2245896264822	5.980528391215028e-13
ENSG00000172262	ZNF131	5	cg02017534	13	46425999	-9.342504676316443	1.5148193413903283e-20
ENSG00000172262	ZNF131	5	cg04105091	6	32121355	-7.7985785844213575	7.91535763561184e-15
ENSG00000172262	ZNF131	5	cg04834502	16	48644360	-6.78701294708208	1.3118224661093818e-11
ENSG00000172262	ZNF131	5	cg05374271	1	192778890	-8.824892582231673	1.6034267679596323e-18
ENSG00000172262	ZNF131	5	cg05454635	15	74657911	-7.281876784793471	3.93858793848396e-13
ENSG00000172262	ZNF131	5	cg05658793	22	18893382	-7.712052213277823	1.5496760888010652e-14
ENSG00000172262	ZNF131	5	cg06264679	6	32121433	-7.039594633200476	2.255946127624246e-12
ENSG00000172262	ZNF131	5	cg08605991	13	46426238	-8.540565915521539	1.866933021158855e-17
ENSG00000172262	ZNF131	5	cg08962798	5	179106333	-7.73256133190985	1.3223914158213962e-14
ENSG00000172262	ZNF131	5	cg10148764	2	101618394	-7.1879958209483545	7.796663324826322e-13
ENSG00000172262	ZNF131	5	cg10883258	5	179239447	13.546760516710316	6.426193904322508e-41
ENSG00000172262	ZNF131	5	cg11099375	17	62141556	-7.506953198245275	7.406522196080204e-14
ENSG00000172262	ZNF131	5	cg12585943	6	32121368	-8.431767991459008	4.68157640063567e-17
ENSG00000172262	ZNF131	5	cg12662887	10	105343920	-9.835119359084436	1.423444361332699e-22
ENSG00000172262	ZNF131	5	cg12979844	13	46425929	-12.205509269988953	1.1331195964873874e-33
ENSG00000172262	ZNF131	5	cg13102294	6	32121393	-7.907475896734122	3.3644804276186286e-15
ENSG00000172262	ZNF131	5	cg13265524	2	202484246	-7.1541151769881965	9.955182722960187e-13
ENSG00000172262	ZNF131	5	cg14269973	13	46425904	-7.466648350496076	1.0025288353968587e-13
ENSG00000172262	ZNF131	5	cg15053190	22	18893313	-7.881363524821839	4.1347904359641294e-15
ENSG00000172262	ZNF131	5	cg16512755	1	32670916	-6.964282006198643	3.837403000057318e-12
ENSG00000172262	ZNF131	5	cg16541026	3	49026934	-9.888290513252457	8.486673641501683e-23
ENSG00000172262	ZNF131	5	cg17108430	4	108745557	-7.692818602649055	1.797553187585971e-14
ENSG00000172262	ZNF131	5	cg19432362	13	46426263	-9.908131564149642	6.992563068043492e-23
ENSG00000172262	ZNF131	5	cg19539667	17	43339831	-7.717104696980095	1.4903486244541966e-14
ENSG00000172262	ZNF131	5	cg21475150	2	101618248	-11.05443157855172	5.24874439066927e-28
ENSG00000172262	ZNF131	5	cg22809047	2	101618261	-8.376580875831921	7.431531019914474e-17
ENSG00000172262	ZNF131	5	cg22956023	2	96675729	-7.720775853388453	1.4486489583113206e-14
ENSG00000172262	ZNF131	5	cg25658983	13	46426026	-13.059112075336028	3.32563874830072e-38
ENSG00000234284	ZNF879	5	cg00012238	18	21718458	7.776895793745004	9.378770346425164e-15
ENSG00000234284	ZNF879	5	cg03026306	18	21718767	10.074978467672283	1.3550190479036297e-23
ENSG00000234284	ZNF879	5	cg03354476	17	7077335	8.602927086574262	1.0977817319032598e-17
ENSG00000234284	ZNF879	5	cg04673465	4	85570164	9.192027303273749	6.034370882063097e-20
ENSG00000234284	ZNF879	5	cg05369942	4	142228617	13.21942412761175	4.3830367187297676e-39
ENSG00000234284	ZNF879	5	cg06235000	7	116593769	7.809632386382566	7.265302299574755e-15
ENSG00000234284	ZNF879	5	cg09259409	1	247654811	7.534090754932353	6.038827406359975e-14
ENSG00000234284	ZNF879	5	cg10044101	6	133084289	13.698413670010117	8.873924934012258e-42
ENSG00000234284	ZNF879	5	cg11805414	4	43132510	-7.695885973953489	1.7566159931933504e-14
ENSG00000234284	ZNF879	5	cg13875033	1	3236688	16.789028079815825	3.4081462678520175e-61
ENSG00000234284	ZNF879	5	cg15473569	17	45854061	12.70693574061156	2.6761073401431157e-36
ENSG00000234284	ZNF879	5	cg17929920	19	11348704	14.013128088110639	1.3530687899961742e-43
ENSG00000234284	ZNF879	5	cg26154268	14	22538783	13.444626826834343	2.4327780009603765e-40
ENSG00000234284	ZNF879	5	cg27087233	6	138860932	9.567459882222861	1.850974283443723e-21
ENSG00000112182	BACH2	6	cg14583999	3	10019040	8.296094180191862	1.450914381848502e-16
ENSG00000112182	BACH2	6	cg14750543	20	4776111	6.9308091526347235	4.851498202135956e-12
ENSG00000112182	BACH2	6	cg24683414	1	92952581	7.157059490249764	9.747602102049429e-13
ENSG00000178409	BEND3	6	cg00561739	5	1807733	9.381481947802364	1.0559140361647516e-20
ENSG00000178409	BEND3	6	cg02447879	17	79393682	7.2494305764719495	4.992107793037824e-13
ENSG00000178409	BEND3	6	cg02796939	17	80545125	7.483758217818571	8.818706819571431e-14
ENSG00000178409	BEND3	6	cg06211255	11	65153842	8.490637727780069	2.8511502856661667e-17
ENSG00000178409	BEND3	6	cg09735822	12	133015059	7.382003627490866	1.88408105199454e-13
ENSG00000178409	BEND3	6	cg10170847	19	41834029	8.234252552254802	2.4154496252603406e-16
ENSG00000178409	BEND3	6	cg11442326	5	1807695	7.067687897222601	1.8480210107556423e-12
ENSG00000178409	BEND3	6	cg12590521	12	121678474	8.985722257203598	3.869157241328995e-19
ENSG00000178409	BEND3	6	cg13274938	17	38493822	7.500740863251301	7.761873765910592e-14
ENSG00000178409	BEND3	6	cg14807793	6	34164564	7.299600138902652	3.4592813045477045e-13
ENSG00000178409	BEND3	6	cg16919680	12	53230033	6.855840559662745	8.168984656517425e-12
ENSG00000178409	BEND3	6	cg17292667	13	110787523	8.561528560500582	1.5621422596227997e-17
ENSG00000178409	BEND3	6	cg17619876	5	1807759	8.292318937444385	1.4968199959163398e-16
ENSG00000178409	BEND3	6	cg19811934	14	92927763	7.308942381654094	3.230044235738822e-13
ENSG00000178409	BEND3	6	cg23634348	4	967822	7.30017737700195	3.4446653108600353e-13
ENSG00000153162	BMP6	6	cg02053265	5	1325068	-8.089093481263715	7.879724850567095e-16
ENSG00000153162	BMP6	6	cg03909886	10	42606808	11.248912386068701	6.298269056422456e-29
ENSG00000198663	C6orf89	6	cg27371125	11	350906	11.773592672670802	1.7497148591071311e-31
ENSG00000164465	DCBLD1	6	cg11177235	1	55089182	-11.436510353283392	7.881487682259827e-30
ENSG00000198719	DLL1	6	cg11474778	8	95487352	7.832934988083027	6.05021737571193e-15
ENSG00000198721	ECI2	6	cg04398060	6	31555671	9.818995344980713	1.6645192007836189e-22
ENSG00000198721	ECI2	6	cg15043642	5	141061863	9.850899633869545	1.2214125499147003e-22
ENSG00000112685	EXOC2	6	cg09625274	15	48413049	20.674658009266967	2.421485571836072e-90
ENSG00000112584	FAM120B	6	cg11474778	8	95487352	8.791393954835177	2.149580141971525e-18
ENSG00000112584	FAM120B	6	cg24041822	14	55493335	-9.884913497810933	8.770737931969867e-23
ENSG00000188820	FAM26F	6	cg14417861	5	138089815	-10.580320921089966	7.996482590460118e-26
ENSG00000118496	FBXO30	6	cg00297432	1	6484784	7.6413462042473626	2.6688428640621323e-14
ENSG00000111846	GCNT2	6	cg10443068	12	57780179	7.687000738489512	1.8800436710521148e-14
ENSG00000137265	IRF4	6	cg01554453	6	132129103	7.353790735861245	2.320821024058618e-13
ENSG00000137265	IRF4	6	cg03553358	16	11350115	-7.131941102200724	1.1673203190406535e-12
ENSG00000185760	KCNQ5	6	cg22072651	11	17375003	-7.172564295233212	8.714783071377768e-13
ENSG00000111885	MAN1A1	6	cg22318509	12	58068506	-41.93540276132284	2.5217e-319
ENSG00000156711	MAPK13	6	cg16830248	11	3493084	-9.941633759992541	5.051698054820071e-23
ENSG00000111912	NCOA7	6	cg05039488	6	79577232	13.286624456928797	1.8471482092938414e-39
ENSG00000146232	NFKBIE	6	cg00133624	12	3756130	7.453381839775615	1.1077443628895633e-13
ENSG00000146232	NFKBIE	6	cg00220721	11	36422443	6.890361865481529	6.432344297072549e-12
ENSG00000146232	NFKBIE	6	cg00499237	2	97169033	9.664196724271111	7.383452240480932e-22
ENSG00000146232	NFKBIE	6	cg01017257	1	15059738	7.194625229414173	7.434784406472289e-13
ENSG00000146232	NFKBIE	6	cg01102826	4	1623797	7.134927563870306	1.1432154801595224e-12
ENSG00000146232	NFKBIE	6	cg01156844	15	85520317	11.352616313136721	2.0093640229698148e-29
ENSG00000146232	NFKBIE	6	cg01228685	8	145031536	8.709077712932263	4.401848740041071e-18
ENSG00000146232	NFKBIE	6	cg01496136	16	57375219	8.16227206066498	4.3547365725420237e-16
ENSG00000146232	NFKBIE	6	cg02043329	13	49740771	7.290269930228239	3.7054720312520217e-13
ENSG00000146232	NFKBIE	6	cg02233149	2	97171243	7.714265604021079	1.5242483258636556e-14
ENSG00000146232	NFKBIE	6	cg02240252	17	47931591	7.604083763224102	3.550175150415675e-14
ENSG00000146232	NFKBIE	6	cg03052004	6	11702389	8.423974371878506	5.002038934530803e-17
ENSG00000146232	NFKBIE	6	cg03078551	17	41656298	7.939122733809554	2.6200006680871423e-15
ENSG00000146232	NFKBIE	6	cg03889450	4	10082415	7.302351147773188	3.391379307884076e-13
ENSG00000146232	NFKBIE	6	cg04011474	2	28904455	10.322836764063247	1.1262034310622608e-24
ENSG00000146232	NFKBIE	6	cg04915300	2	157314925	9.512729980467164	3.1007642827206885e-21
ENSG00000146232	NFKBIE	6	cg05146922	2	10634174	7.361092670745117	2.2003304590314658e-13
ENSG00000146232	NFKBIE	6	cg05265611	1	3129633	11.12402722393667	2.4728715655820914e-28
ENSG00000146232	NFKBIE	6	cg05376738	1	212923780	9.868605554585473	1.0295542966463426e-22
ENSG00000146232	NFKBIE	6	cg05503062	15	90324339	14.590891051173394	5.007644977843085e-47
ENSG00000146232	NFKBIE	6	cg05875421	14	91709951	8.63312298752544	8.47337803283256e-18
ENSG00000146232	NFKBIE	6	cg05991220	3	52813859	7.6513103716228414	2.4743970216755095e-14
ENSG00000146232	NFKBIE	6	cg06169746	3	119419493	9.269337102538504	2.975846121893866e-20
ENSG00000146232	NFKBIE	6	cg06489037	3	107706245	7.403112212556813	1.6114552023473635e-13
ENSG00000146232	NFKBIE	6	cg06764092	1	159796658	13.73184978355334	5.709915472032413e-42
ENSG00000146232	NFKBIE	6	cg07037944	15	64290807	10.203451459771712	3.758330530297971e-24
ENSG00000146232	NFKBIE	6	cg07072405	12	105839243	8.373875420275867	7.607039148843983e-17
ENSG00000146232	NFKBIE	6	cg07136133	11	36422377	19.398589439179485	3.3001727695427856e-80
ENSG00000146232	NFKBIE	6	cg07348809	3	10333196	6.968604181868346	3.724104469418227e-12
ENSG00000146232	NFKBIE	6	cg09340403	6	138247491	8.067762848875642	9.365023568057753e-16
ENSG00000146232	NFKBIE	6	cg09491962	10	98900771	11.440857629327834	7.529402847191806e-30
ENSG00000146232	NFKBIE	6	cg10092518	1	57670054	7.3479779500206375	2.4241461114251883e-13
ENSG00000146232	NFKBIE	6	cg10346111	3	10326661	8.179454533802224	3.7853981524399815e-16
ENSG00000146232	NFKBIE	6	cg11739399	1	206669785	15.259193047248688	3.775376566248499e-51
ENSG00000146232	NFKBIE	6	cg11998932	7	3901843	8.958864693795883	4.918233770785804e-19
ENSG00000146232	NFKBIE	6	cg12251145	6	30124744	7.3618950553145766	2.1873165693647102e-13
ENSG00000146232	NFKBIE	6	cg12424624	3	46718941	7.570209262394669	4.5934887768059486e-14
ENSG00000146232	NFKBIE	6	cg12547807	1	9473751	10.906572667786106	2.5775002911998187e-27
ENSG00000146232	NFKBIE	6	cg14499387	22	31668786	17.56399490956086	1.3432574134227967e-66
ENSG00000146232	NFKBIE	6	cg14689317	11	64128973	8.605393868939501	1.0747536122823485e-17
ENSG00000146232	NFKBIE	6	cg14886629	3	10333655	11.906793170721036	3.7622456161907696e-32
ENSG00000146232	NFKBIE	6	cg15006864	22	18265049	10.788761053061757	9.014621450311024e-27
ENSG00000146232	NFKBIE	6	cg15193228	22	30855332	9.377608864264383	1.0955996977363187e-20
ENSG00000146232	NFKBIE	6	cg16306654	1	6419767	7.648295087229837	2.532250270861496e-14
ENSG00000146232	NFKBIE	6	cg17578639	3	176862949	8.504409749607253	2.539207364248646e-17
ENSG00000146232	NFKBIE	6	cg18008247	3	124719009	7.0972938060333055	1.4968352206979098e-12
ENSG00000146232	NFKBIE	6	cg18372930	5	137939469	8.1230522623668	5.989701632356699e-16
ENSG00000146232	NFKBIE	6	cg18560092	15	71183869	9.354993926065582	1.3510870572803751e-20
ENSG00000146232	NFKBIE	6	cg18984211	2	73498074	9.071099629956356	1.802689286002727e-19
ENSG00000146232	NFKBIE	6	cg19017142	2	64431245	9.129606668751112	1.0633605863554127e-19
ENSG00000146232	NFKBIE	6	cg19268652	6	12119552	18.14601612923911	8.57983149262013e-71
ENSG00000146232	NFKBIE	6	cg19310148	7	26196274	9.807504403471802	1.862760200533409e-22
ENSG00000146232	NFKBIE	6	cg19312404	12	104213449	13.925997744350227	4.3429071509925546e-43
ENSG00000146232	NFKBIE	6	cg19931644	8	12623485	8.25713662864984	2.0021975004676173e-16
ENSG00000146232	NFKBIE	6	cg20359565	17	41043969	8.284119293810905	1.6027081899554315e-16
ENSG00000146232	NFKBIE	6	cg20774552	11	46415316	6.974338391810249	3.5770767726732836e-12
ENSG00000146232	NFKBIE	6	cg21066748	19	46005805	7.725381725767767	1.3987313370525998e-14
ENSG00000146232	NFKBIE	6	cg21301505	1	159796629	10.510817970850765	1.644540744174415e-25
ENSG00000146232	NFKBIE	6	cg21520537	3	10326774	7.835240435053169	5.9453585994638565e-15
ENSG00000146232	NFKBIE	6	cg21529807	19	42134478	8.276070843756466	1.71283356327668e-16
ENSG00000146232	NFKBIE	6	cg21695395	11	128364143	11.889148769770912	4.6145906387182887e-32
ENSG00000146232	NFKBIE	6	cg22444102	18	74175208	10.403040656262005	4.97539242880166e-25
ENSG00000146232	NFKBIE	6	cg22851864	10	5688470	6.995781939241168	3.076024881457876e-12
ENSG00000146232	NFKBIE	6	cg23813257	16	3115286	8.290092087202408	1.5255264939262892e-16
ENSG00000146232	NFKBIE	6	cg23824762	2	97171137	10.905779568256815	2.599426221845918e-27
ENSG00000146232	NFKBIE	6	cg24174557	17	57903544	7.205977301212546	6.848095306550281e-13
ENSG00000146232	NFKBIE	6	cg24449091	1	167773027	8.0569935957507	1.02134244738542e-15
ENSG00000146232	NFKBIE	6	cg24497361	11	3858493	7.160278297029725	9.527004597711403e-13
ENSG00000146232	NFKBIE	6	cg24628310	3	52813873	7.688077678867954	1.8654335199987034e-14
ENSG00000146232	NFKBIE	6	cg24757533	17	74494286	7.814479762795506	6.994732345623767e-15
ENSG00000146232	NFKBIE	6	cg25123427	3	39054994	7.106101899284167	1.4055030056525796e-12
ENSG00000146232	NFKBIE	6	cg25726085	19	14262409	10.053998464748638	1.6679882500278762e-23
ENSG00000146232	NFKBIE	6	cg26471982	8	10701153	6.942082902143972	4.484930589162028e-12
ENSG00000146232	NFKBIE	6	cg26543539	1	156907349	7.2270754749885135	5.876009197027362e-13
ENSG00000146232	NFKBIE	6	cg27134832	3	194815339	6.8242648875305925	1.0160466833783974e-11
ENSG00000146232	NFKBIE	6	cg27663936	11	60162623	7.878958498172951	4.216449597705755e-15
ENSG00000124789	NUP153	6	cg02720013	3	178981100	17.143535021451505	1.2070454286776236e-63
ENSG00000124789	NUP153	6	cg02964182	2	183473236	-27.507086087189148	8.452281284213094e-153
ENSG00000124789	NUP153	6	cg18888697	5	117543966	-6.965341238001557	3.809263343812074e-12
ENSG00000124789	NUP153	6	cg27493342	3	177527009	16.71620744088503	1.0596906715581304e-60
ENSG00000137275	RIPK1	6	cg17609731	7	77325533	-7.48319894164082	8.85886444281728e-14
ENSG00000261584	RP11-457M11.5	6	cg00475820	6	58180155	8.32920719953467	1.10402991533787e-16
ENSG00000124614	RPS10	6	cg16483473	8	99813010	-7.803526934092126	7.621566310186058e-15
ENSG00000112306	RPS12	6	cg05493001	19	52195559	14.144216758448108	2.294041944330842e-44
ENSG00000071242	RPS6KA2	6	cg00931577	5	132299661	7.050266826622612	2.0914508256307163e-12
ENSG00000164483	SAMD3	6	cg23366234	21	45713704	8.35358823135872	9.000355902095222e-17
ENSG00000164483	SAMD3	6	cg26472802	21	45713719	7.794813308962842	8.150438354033284e-15
ENSG00000111897	SERINC1	6	cg03492094	9	91994786	6.8750579612162355	7.149649980743836e-12
ENSG00000111897	SERINC1	6	cg24125648	15	44092606	8.3263229395266265	1.1288434561607545e-16
ENSG00000124786	SLC35B3	6	cg27021529	8	4440491	12.46783006531266	4.909265020304459e-35
ENSG00000112592	TBP	6	cg17505339	1	720865	-8.046899151614992	1.1070002690989633e-15
ENSG00000066651	TRMT11	6	cg05039488	6	79577232	-7.453010830453163	1.1101781941418398e-13
ENSG00000137267	TUBB2A	6	cg17609731	7	77325533	9.482544814370273	4.116853860250707e-21
ENSG00000123552	USP45	6	cg05724197	16	57406044	51.420004215299144	0
ENSG00000123552	USP45	6	cg11190754	5	64858552	9.114328776832098	1.219334384855824e-19
ENSG00000189298	ZKSCAN3	6	cg03438618	10	134748675	9.990458588372805	3.118842589798723e-23
ENSG00000189298	ZKSCAN3	6	cg08823182	1	153514482	-7.193180328621097	7.509747434508164e-13
ENSG00000189298	ZKSCAN3	6	cg13179056	11	50220389	-16.664851768930994	2.3640583666914796e-60
ENSG00000189298	ZKSCAN3	6	cg19808620	1	153514442	-12.195324589424157	1.2783908969844994e-33
ENSG00000189298	ZKSCAN3	6	cg20495738	12	2338399	-7.956792781975994	2.2754041798045277e-15
ENSG00000189298	ZKSCAN3	6	cg22664798	10	134750215	8.733927774710578	3.54555133241674e-18
ENSG00000153975	ZUFSP	6	cg17855130	1	164819399	-10.232121126492514	2.8135035409928096e-24
ENSG00000133627	ACTR3B	7	cg18367110	1	111992173	-11.878017851277002	5.228068503732597e-32
ENSG00000105963	ADAP1	7	cg26451735	15	74494900	-10.980560346700312	1.1668485575150773e-27
ENSG00000133597	ADCK2	7	cg12670123	10	44090827	-8.021235410176322	1.3605631874991545e-15
ENSG00000070669	ASNS	7	cg08143688	14	52216704	-13.01620903510594	5.705950866617445e-38
ENSG00000070669	ASNS	7	cg15395345	8	6946366	9.255666154365134	3.3696123640168016e-20
ENSG00000241468	ATP5J2	7	cg09045935	12	6379348	-15.316220357250678	1.6676878082786422e-51
ENSG00000106009	BRAT1	7	cg16920189	15	100105709	-11.735454965110604	2.700275251861388e-31
ENSG00000146540	C7orf50	7	cg01087832	11	68039514	9.442483420361773	5.98998640932034e-21
ENSG00000146540	C7orf50	7	cg22825631	10	105253538	20.809271463472314	2.0006289382091732e-91
ENSG00000146574	CCZ1B	7	cg01242451	7	97602580	-8.017337339920884	1.4045420613460201e-15
ENSG00000146574	CCZ1B	7	cg01515114	4	4139730	8.470465412050562	3.38362601208722e-17
ENSG00000164649	CDCA7L	7	cg01554357	1	164750454	6.903363846426906	5.8735351973107705e-12
ENSG00000164649	CDCA7L	7	cg02959112	1	19978788	7.017787639049521	2.6322128920649184e-12
ENSG00000164649	CDCA7L	7	cg03001176	1	110734136	7.451032749765217	1.1266695292566955e-13
ENSG00000164649	CDCA7L	7	cg03412045	16	77272123	6.987204875719847	3.265987202260588e-12
ENSG00000164649	CDCA7L	7	cg03508052	8	17556355	7.420147186128516	1.4187462862214751e-13
ENSG00000164649	CDCA7L	7	cg04021672	9	34457129	7.261107075387332	4.583595771580226e-13
ENSG00000164649	CDCA7L	7	cg04152326	2	1488314	6.808124810265643	1.134830678222813e-11
ENSG00000164649	CDCA7L	7	cg05152713	9	38425359	7.388319689723839	1.797451266162953e-13
ENSG00000164649	CDCA7L	7	cg05934276	4	148984769	7.054443366870589	2.0300945242953706e-12
ENSG00000164649	CDCA7L	7	cg07972805	11	133916608	9.594753672985188	1.4269017147115435e-21
ENSG00000164649	CDCA7L	7	cg08248577	16	19727447	7.9941963516265675	1.6884461818951771e-15
ENSG00000164649	CDCA7L	7	cg08511818	20	30104637	7.208417783574229	6.724324691476128e-13
ENSG00000164649	CDCA7L	7	cg08516247	5	1060773	7.725966543091919	1.3914109595704396e-14
ENSG00000164649	CDCA7L	7	cg08733739	6	13438879	7.219915449123261	6.186220023578903e-13
ENSG00000164649	CDCA7L	7	cg08758727	4	17490571	7.613777031281303	3.294946524563974e-14
ENSG00000164649	CDCA7L	7	cg09107364	6	170060666	8.303117658271795	1.3683853850824121e-16
ENSG00000164649	CDCA7L	7	cg09223698	1	218497686	7.205608608483363	6.862632109752555e-13
ENSG00000164649	CDCA7L	7	cg09890930	12	56149396	7.554320500694513	5.178170267097587e-14
ENSG00000164649	CDCA7L	7	cg12363746	5	121187445	7.664636956885717	2.2323334752372418e-14
ENSG00000164649	CDCA7L	7	cg12595026	5	1565222	6.902124114163974	5.924433304456747e-12
ENSG00000164649	CDCA7L	7	cg13134763	2	983306	7.645745985838237	2.5804036440634345e-14
ENSG00000164649	CDCA7L	7	cg13290745	5	159655866	6.9345053505517	4.726758944492443e-12
ENSG00000164649	CDCA7L	7	cg14328761	4	188858709	9.554047765162352	2.0973018032122804e-21
ENSG00000164649	CDCA7L	7	cg14886379	13	25468516	6.84312124290476	8.917838048216473e-12
ENSG00000164649	CDCA7L	7	cg15002761	11	133816097	9.126961035449645	1.087614588718089e-19
ENSG00000164649	CDCA7L	7	cg16017429	5	1087252	7.518284953321358	6.799282178137445e-14
ENSG00000164649	CDCA7L	7	cg16493813	8	17521952	7.339639394102654	2.576406376601529e-13
ENSG00000164649	CDCA7L	7	cg17028831	10	95651248	8.712099009251295	4.2832318178126735e-18
ENSG00000164649	CDCA7L	7	cg17512133	4	77973813	7.289374452002336	3.727709493675416e-13
ENSG00000164649	CDCA7L	7	cg19649018	10	131260468	6.910320365224253	5.595784092581867e-12
ENSG00000164649	CDCA7L	7	cg20880080	18	19780644	7.502705791270484	7.646049392403636e-14
ENSG00000164649	CDCA7L	7	cg21741223	5	1257903	7.649783560129773	2.5017860258487836e-14
ENSG00000164649	CDCA7L	7	cg21863334	20	36157405	7.258922313909198	4.657259862470585e-13
ENSG00000164649	CDCA7L	7	cg21996149	7	155792826	7.147993858094915	1.040213093326651e-12
ENSG00000164649	CDCA7L	7	cg22064182	6	129972878	9.379859159392852	1.0713061283149591e-20
ENSG00000164649	CDCA7L	7	cg22648929	2	1689137	10.73944806748171	1.5128214213181681e-26
ENSG00000164649	CDCA7L	7	cg22825871	6	32043561	6.865329148591101	7.648502401258887e-12
ENSG00000164649	CDCA7L	7	cg22882446	11	111495638	7.186488514355291	7.881090571192847e-13
ENSG00000164649	CDCA7L	7	cg23440144	3	136016212	6.963601150250445	3.855353874411396e-12
ENSG00000164649	CDCA7L	7	cg24876577	1	7121446	7.089842693978446	1.5778084510475526e-12
ENSG00000164649	CDCA7L	7	cg24953633	1	201107102	8.87700785694598	1.0138392418256377e-18
ENSG00000164649	CDCA7L	7	cg25189873	13	51915101	7.5323151351537465	6.116065976144861e-14
ENSG00000164649	CDCA7L	7	cg25279555	18	67138568	7.285904391602865	3.823657868890292e-13
ENSG00000164649	CDCA7L	7	cg25636820	19	40424192	6.890800541811072	6.409799330604649e-12
ENSG00000164649	CDCA7L	7	cg26750548	10	88441152	7.311212085649814	3.175933528446824e-13
ENSG00000164649	CDCA7L	7	cg27193813	12	122492914	9.258427260223183	3.2842799018430067e-20
ENSG00000164649	CDCA7L	7	cg27624327	5	510254	7.749715672674654	1.157553599960178e-14
ENSG00000106153	CHCHD2	7	cg13383591	1	15931055	10.641071633850343	4.2479699703976225e-26
ENSG00000106153	CHCHD2	7	cg21232397	9	138408115	7.305102354655142	3.3224043034252895e-13
ENSG00000106603	COA1	7	cg07095337	10	134621275	-11.84107010579103	8.033821688110117e-32
ENSG00000106603	COA1	7	cg09474938	6	30875843	-7.393806265349691	1.7266231881598474e-13
ENSG00000106603	COA1	7	cg19148731	2	74780229	-80.67327380249571	0
ENSG00000091073	DTX2	7	cg16991671	14	54956552	-10.694476327854963	2.432159878067443e-26
ENSG00000117868	ESYT2	7	cg03156396	16	816177	-29.96270926078385	2.805861804735389e-178
ENSG00000117868	ESYT2	7	cg10493855	14	91087586	-21.135438628551498	3.9896986604651384e-94
ENSG00000122687	FTSJ2	7	cg00273068	20	39995747	-25.474986031072007	7.662651880540158e-133
ENSG00000122687	FTSJ2	7	cg04565464	8	145669602	18.791341725130394	1.4093561351245875e-75
ENSG00000122687	FTSJ2	7	cg13952031	9	101706041	-14.739982225885294	6.228786556809932e-48
ENSG00000122687	FTSJ2	7	cg21156815	8	22526736	8.148525708901436	4.870647925022479e-16
ENSG00000122687	FTSJ2	7	cg24694675	1	76082066	20.041848202746436	3.0433434077800656e-85
ENSG00000146535	GNA12	7	cg01999086	20	52824411	12.37569935539191	1.492243286021156e-34
ENSG00000146535	GNA12	7	cg20812973	2	59470237	8.172154325129448	4.016602184234208e-16
ENSG00000164849	GPR146	7	cg01196712	3	167812510	7.391635282949146	1.7549190119186026e-13
ENSG00000164849	GPR146	7	cg10480062	7	44149037	-9.189455206904482	6.177369497633721e-20
ENSG00000164849	GPR146	7	cg13565492	6	43139072	-12.562634892692397	1.5623844798038867e-35
ENSG00000164849	GPR146	7	cg19849509	2	175204996	-9.317250756451317	1.9151477151086438e-20
ENSG00000164849	GPR146	7	cg22825631	10	105253538	19.024230236782333	2.4429398200530888e-77
ENSG00000164849	GPR146	7	cg26451735	15	74494900	-8.64661623044302	7.546366677148186e-18
ENSG00000106070	GRB10	7	cg01959416	7	150020818	-12.731633301802407	1.9634499478855487e-36
ENSG00000105968	H2AFV	7	cg07461772	16	68482809	-6.986299584924526	3.288721112903443e-12
ENSG00000185811	IKZF1	7	cg01635063	19	728385	8.147195542503052	4.9185751521218e-16
ENSG00000185811	IKZF1	7	cg01919208	3	49170496	7.513407969525774	7.053575837959291e-14
ENSG00000185811	IKZF1	7	cg02954987	3	49170599	8.237240847964957	2.3558642524142294e-16
ENSG00000185811	IKZF1	7	cg05654765	3	49170727	8.332296606095284	1.0742171809822882e-16
ENSG00000185811	IKZF1	7	cg05797770	1	16470667	6.961223927236409	3.9200529373338366e-12
ENSG00000185811	IKZF1	7	cg07876162	19	728176	7.212818704704177	6.512857757526426e-13
ENSG00000185811	IKZF1	7	cg08234664	3	49170668	8.020990043799463	1.3625406371735902e-15
ENSG00000185811	IKZF1	7	cg09092525	20	58570133	8.069403297272208	9.233517193723468e-16
ENSG00000185811	IKZF1	7	cg09322513	16	65555681	10.332502439883022	1.0184627043233573e-24
ENSG00000185811	IKZF1	7	cg11566975	3	49170849	7.867878184569732	4.597061618281109e-15
ENSG00000185811	IKZF1	7	cg11693709	15	40542019	7.200060676387645	7.143735321140342e-13
ENSG00000185811	IKZF1	7	cg14071869	6	41624407	7.920253051713143	3.040181104666787e-15
ENSG00000185811	IKZF1	7	cg14099457	3	49170794	8.501250416159323	2.6050869835591052e-17
ENSG00000185811	IKZF1	7	cg16832295	19	728095	8.75816641758698	2.870926638819831e-18
ENSG00000185811	IKZF1	7	cg24750513	2	127819455	8.009284071989164	1.4964585169798195e-15
ENSG00000185811	IKZF1	7	cg25764534	8	22485721	9.242781285059408	3.790067059546369e-20
ENSG00000185811	IKZF1	7	cg27183173	19	728040	7.246196940059583	5.109793125553041e-13
ENSG00000186480	INSIG1	7	cg05348982	12	81331012	7.592661001634647	3.8702589400045813e-14
ENSG00000186480	INSIG1	7	cg14358282	2	219866628	12.574543846005565	1.344609845997963e-35
ENSG00000186480	INSIG1	7	cg15721666	12	120799597	27.777059875876922	1.5249053824797803e-155
ENSG00000186480	INSIG1	7	cg18666004	3	42003746	12.38895031695723	1.2687852256293882e-34
ENSG00000170852	KBTBD2	7	cg11315021	6	168580545	-9.092365847041538	1.4869621100249352e-19
ENSG00000165055	METTL2B	7	cg05357861	7	51460827	12.76635195662909	1.2867560849711886e-36
ENSG00000165055	METTL2B	7	cg18976797	7	56434617	12.425610979048365	8.201294830698855e-35
ENSG00000164877	MICALL2	7	cg01762827	16	69141442	7.48412972484736	8.79977398026727e-14
ENSG00000164877	MICALL2	7	cg02637438	8	134584246	37.1090122264826	1.892724841433834e-259
ENSG00000146918	NCAPG2	7	cg03156396	16	816177	-13.141625936940219	1.1706354393080773e-38
ENSG00000146918	NCAPG2	7	cg10493855	14	91087586	-7.543992888169427	5.599265602077831e-14
ENSG00000146918	NCAPG2	7	cg11275626	17	47841347	-8.91830620107537	7.039239739211718e-19
ENSG00000122643	NT5C3A	7	cg22748443	7	14030992	8.213042366617518	2.8741478546865427e-16
ENSG00000164815	ORC5	7	cg10681811	5	76904661	-8.615074863775398	9.883018944840931e-18
ENSG00000164776	PHKG1	7	cg10543376	6	33137989	-7.883903103366749	4.053312505551588e-15
ENSG00000164776	PHKG1	7	cg17801256	1	35734334	7.092662166409045	1.5466788917535333e-12
ENSG00000164776	PHKG1	7	cg18071532	12	48357234	-8.406663016059053	5.779710018530999e-17
ENSG00000164776	PHKG1	7	cg22792862	14	67827087	-11.055964968594573	5.164727266042367e-28
ENSG00000122678	POLM	7	cg19148731	2	74780229	-7.57703027471799	4.3625403243753886e-14
ENSG00000168255	POLR2J3	7	cg12791476	7	44059249	10.601698152897738	6.410540248905584e-26
ENSG00000168255	POLR2J3	7	cg16782613	7	44058922	9.937508272500315	5.252221214162876e-23
ENSG00000168255	POLR2J3	7	cg19008921	4	42387381	10.209233829325274	3.5451323328669374e-24
ENSG00000135213	POM121C	7	cg19116668	7	99932089	10.535922189534844	1.2683350514625463e-25
ENSG00000155093	PTPRN2	7	cg01852244	16	47494711	-7.336387558078096	2.6395076785803706e-13
ENSG00000155093	PTPRN2	7	cg21244846	9	27529339	-7.1686831346488615	8.964062207864326e-13
ENSG00000170667	RASA4B	7	cg12791476	7	44059249	10.307937938004851	1.3094616310418462e-24
ENSG00000170667	RASA4B	7	cg21537297	8	144298583	-6.86904711034053	7.456942406616198e-12
ENSG00000146587	RBAK	7	cg17877470	19	9903989	7.683997429316402	1.924438524251714e-14
ENSG00000105982	RNF32	7	cg13379408	18	11909052	18.66633317680812	1.201060694460857e-74
ENSG00000205060	SLC35B4	7	cg17931180	7	39770703	-29.060790703053414	9.409590484817445e-169
ENSG00000205060	SLC35B4	7	cg20361427	7	7610535	8.245340427199311	2.2045782681362274e-16
ENSG00000197157	SND1	7	cg07302293	11	64391697	10.392858472869674	5.51895459957691e-25
ENSG00000232956	SNHG15	7	cg16454099	7	92818323	-9.291259493664583	2.4331846252570538e-20
ENSG00000127952	STYXL1	7	cg03694936	5	140179490	8.070729188727853	9.140777804525514e-16
ENSG00000177683	THAP5	7	cg05171921	7	157917118	-27.08317689338768	1.4719414124845703e-148
ENSG00000177683	THAP5	7	cg12812167	1	155054054	7.5863708087204484	4.060615856581245e-14
ENSG00000177683	THAP5	7	cg19501543	1	35875651	-11.2554480375939	5.860172722835592e-29
ENSG00000196683	TOMM7	7	cg09373786	8	93156639	7.68827756396138	1.8617503362462627e-14
ENSG00000158457	TSPAN33	7	cg03016975	19	4124072	-15.846525667791374	6.606803131150559e-55
ENSG00000158457	TSPAN33	7	cg24748945	19	4123852	25.988044954505817	8.998629218405983e-138
ENSG00000006715	VPS41	7	cg01809281	2	24162256	10.53640844198522	1.2598562255787577e-25
ENSG00000126870	WDR60	7	cg03156396	16	816177	14.060422007550908	7.106060392640696e-44
ENSG00000126870	WDR60	7	cg10493855	14	91087586	10.930833990378853	1.9830296782183165e-27
ENSG00000126870	WDR60	7	cg16641210	22	18957864	-15.349483415460789	1.0068146633285432e-51
ENSG00000126870	WDR60	7	cg21167628	1	45308625	-17.330131303226416	5.9388176448713065e-65
ENSG00000126870	WDR60	7	cg22654137	21	45791428	-18.19732309805333	3.5443206098000033e-71
ENSG00000126870	WDR60	7	cg25895971	17	77904396	-9.389419917929908	9.802925682613877e-21
ENSG00000178381	ZFAND2A	7	cg06548193	7	47293799	9.557488905189206	2.0336033289611004e-21
ENSG00000178381	ZFAND2A	7	cg13565492	6	43139072	8.08882055898951	7.901849446119587e-16
ENSG00000178381	ZFAND2A	7	cg21284400	1	149981654	9.255040358514716	3.392812965068113e-20
ENSG00000178381	ZFAND2A	7	cg21384718	1	21503451	18.00452500488713	9.201509854016827e-70
ENSG00000196247	ZNF107	7	cg09378456	7	117313730	-7.841292958830713	5.66608037567212e-15
ENSG00000152926	ZNF117	7	cg23514324	3	12329213	7.4233934332212845	1.3850423282712718e-13
ENSG00000170260	ZNF212	7	cg24536146	1	207997166	7.6527382185020505	2.44719407252258e-14
ENSG00000198039	ZNF273	7	cg13168221	1	22962032	10.091696667879063	1.1457695776038674e-23
ENSG00000204947	ZNF425	7	cg02491905	2	10975305	9.56598966599343	1.8761586979713065e-21
ENSG00000204947	ZNF425	7	cg03585764	5	179554555	7.9390125457952685	2.6219678097169495e-15
ENSG00000204947	ZNF425	7	cg06181697	3	50294603	8.326586466500553	1.1273831313673149e-16
ENSG00000204947	ZNF425	7	cg07085827	2	132121676	7.029516814966006	2.4236470387220733e-12
ENSG00000204947	ZNF425	7	cg08328067	5	179553589	6.823398548194762	1.0220548766366395e-11
ENSG00000204947	ZNF425	7	cg10899547	5	179554111	12.091490977708482	4.360957261125443e-33
ENSG00000204947	ZNF425	7	cg10996931	5	179553922	9.660000200224331	7.683059627073053e-22
ENSG00000204947	ZNF425	7	cg16026035	5	70742893	16.382203178272913	1.9221646675852682e-58
ENSG00000204947	ZNF425	7	cg17500055	1	235805560	7.123142744901014	1.2439634821462274e-12
ENSG00000204947	ZNF425	7	cg22076160	1	235805690	7.859224629772113	4.9243974565048766e-15
ENSG00000204947	ZNF425	7	cg24066641	5	179554466	7.461474873753922	1.0425439693130705e-13
ENSG00000181444	ZNF467	7	cg05595469	21	47845863	-8.012255585318602	1.463349346181716e-15
ENSG00000181220	ZNF746	7	cg09381003	19	41082314	7.529268056662086	6.263184036161608e-14
ENSG00000181220	ZNF746	7	cg13063704	3	48885665	7.844403869993349	5.53369037744211e-15
ENSG00000181220	ZNF746	7	cg16323609	3	48885591	7.178281862208516	8.367708417644955e-13
ENSG00000181220	ZNF746	7	cg24164563	17	74136395	6.855635744347963	8.183425436841196e-12
ENSG00000204946	ZNF783	7	cg02717166	17	42767007	6.784570293353332	1.3343118024841783e-11
ENSG00000158669	AGPAT6	8	cg01818648	8	30515364	7.139925118038896	1.1025068304176425e-12
ENSG00000158669	AGPAT6	8	cg01970784	8	10191983	-28.040394450375363	3.2924244044588105e-158
ENSG00000177335	C8orf31	8	cg08639523	1	228645117	7.9430592009995005	2.5411314848709543e-15
ENSG00000177335	C8orf31	8	cg15892115	18	55102922	7.987469312257434	1.784349727376039e-15
ENSG00000182307	C8orf33	8	cg09960435	19	44323775	-41.43217096822432	9.84528415113e-313
ENSG00000182307	C8orf33	8	cg21304619	7	157292018	-8.526074108658952	2.1140771666798012e-17
ENSG00000185015	CA13	8	cg26883884	1	63874464	-18.857462112491216	4.3672738781093e-76
ENSG00000104267	CA2	8	cg01769354	16	55960809	10.876747903403265	3.534027147864281e-27
ENSG00000104267	CA2	8	cg26883884	1	63874464	7.6024122074544564	3.593436128861833e-14
ENSG00000259758	CASC7	8	cg08444427	17	41987800	8.352693858063226	9.069671194180212e-17
ENSG00000182372	CLN8	8	cg22838003	14	96730482	9.209135040188107	5.155126189096849e-20
ENSG00000164821	DEFA4	8	cg11829072	8	125463024	-7.949707681111259	2.4068090106097665e-15
ENSG00000105339	DENND3	8	cg09038155	4	139937227	-9.11138076288112	1.252641452889593e-19
ENSG00000104412	EMC2	8	cg03887614	1	167132039	11.432079643248374	8.274609168635737e-30
ENSG00000104714	ERICH1	8	cg03987003	1	145516092	-15.997885370516016	6.684479690304433e-56
ENSG00000104714	ERICH1	8	cg04330631	6	42018203	-6.876533690510467	7.0766099188397865e-12
ENSG00000104714	ERICH1	8	cg05461259	1	2344699	-8.454464569601129	3.866575965853403e-17
ENSG00000104714	ERICH1	8	cg06623486	1	162531613	-12.193039496282855	1.3112946848420376e-33
ENSG00000104714	ERICH1	8	cg06826115	15	67835137	11.172902731988367	1.4464766055448476e-28
ENSG00000104714	ERICH1	8	cg07031794	2	26568949	-7.2575221091985895	4.704672366278676e-13
ENSG00000104714	ERICH1	8	cg08598838	16	74331079	-8.216546759258096	2.79178727162126e-16
ENSG00000104714	ERICH1	8	cg14721618	17	76356197	-7.177532543571051	8.407129878857629e-13
ENSG00000104714	ERICH1	8	cg15231902	12	56618064	12.729256122475933	2.0209903900688347e-36
ENSG00000104714	ERICH1	8	cg20325293	4	54244256	-9.697306249249348	5.369416070478792e-22
ENSG00000104714	ERICH1	8	cg21653878	19	54606055	24.990757251718538	2.7417238611784795e-128
ENSG00000104714	ERICH1	8	cg24077454	10	119134782	7.375515563771639	1.9762274076342746e-13
ENSG00000104714	ERICH1	8	cg24639504	13	25875833	-8.650271724660312	7.302688966945583e-18
ENSG00000104714	ERICH1	8	cg25220460	8	123792839	14.71852910205528	8.326796448765748e-48
ENSG00000104714	ERICH1	8	cg25680245	18	19284821	-14.282708467266884	3.4790334018473865e-45
ENSG00000104714	ERICH1	8	cg25775109	19	5823786	7.358007411257844	2.2495313402758887e-13
ENSG00000180921	FAM83H	8	cg04423064	8	37887926	7.821739221963058	6.6198658200799684e-15
ENSG00000180921	FAM83H	8	cg23488616	6	159065864	-12.277455824820953	4.8845209239142655e-34
ENSG00000104290	FZD3	8	cg25344142	1	230882603	11.746088499083934	2.3870830111298225e-31
ENSG00000250571	GLI4	8	cg03237324	12	6420052	7.219895481943571	6.194816747529329e-13
ENSG00000131203	IDO1	8	cg08232855	5	65976586	8.021484729044204	1.357236418297073e-15
ENSG00000131203	IDO1	8	cg08232967	14	32676804	7.832146536114432	6.086649712936491e-15
ENSG00000176595	KBTBD11	8	cg11013298	12	14927928	6.842738310510756	8.941443269131838e-12
ENSG00000204839	MROH6	8	cg08017606	5	145316274	-8.413890813389633	5.453258957806607e-17
ENSG00000036448	MYOM2	8	cg09379965	12	120541737	-7.930177713549161	2.810416145680596e-15
ENSG00000036448	MYOM2	8	cg12150457	5	140165687	-7.864389008325619	4.725305419476809e-15
ENSG00000147813	NAPRT1	8	cg00170236	7	99691604	-7.822380140837892	6.5844007951331685e-15
ENSG00000147813	NAPRT1	8	cg08017606	5	145316274	-27.143937985241003	4.554201580937154e-149
ENSG00000147813	NAPRT1	8	cg08021797	16	85785130	-9.282622522432504	2.6409630704886553e-20
ENSG00000136999	NOV	8	cg18083764	5	4230848	9.054152708426017	2.096648505537899e-19
ENSG00000176623	RMDN1	8	cg04993564	8	59572049	-11.377878619850778	1.5128592225217954e-29
ENSG00000176623	RMDN1	8	cg27317242	8	23145699	-7.764863915483248	1.0290187428956063e-14
ENSG00000008988	RPS20	8	cg23353000	17	42120896	9.849406665231912	1.238904056045497e-22
ENSG00000048392	RRM2B	8	cg23101686	19	54191152	-10.187396905526654	4.407925290621397e-24
ENSG00000169439	SDC2	8	cg01892528	22	43485485	12.806450203777848	7.801179368074575e-37
ENSG00000104549	SQLE	8	cg07936030	17	36756043	-8.928239943090231	6.4494605629261385e-19
ENSG00000104549	SQLE	8	cg21197958	17	36741386	-7.144105189232462	1.06992591311806e-12
ENSG00000104549	SQLE	8	cg21717017	15	74189922	-10.195250399925229	4.0753924704380334e-24
ENSG00000147526	TACC1	8	cg16538531	4	174447292	9.382554852743398	1.046318354447754e-20
ENSG00000104689	TNFRSF10A	8	cg27389205	2	8842692	13.416171663035575	3.515822664007189e-40
ENSG00000160949	TONSL	8	cg04780572	1	111097901	-8.528975588245432	2.065888536648029e-17
ENSG00000171045	TSNARE1	8	cg02128325	5	139422822	14.152541082685133	2.0578210676270969e-44
ENSG00000171045	TSNARE1	8	cg02917321	22	38215204	-6.922756326829181	5.1326648845578955e-12
ENSG00000171045	TSNARE1	8	cg03975235	22	38220611	9.993624515802843	3.0258714621971465e-23
ENSG00000171045	TSNARE1	8	cg06427514	17	40332731	10.306166625274779	1.3327242885322395e-24
ENSG00000171045	TSNARE1	8	cg07416664	22	38221485	9.863517032175235	1.0811864214803599e-22
ENSG00000171044	XKR6	8	cg26278703	11	58910052	8.033633432182606	1.2316275022569105e-15
ENSG00000137135	ARHGEF39	9	cg13039545	6	159307870	13.390426098262974	4.9054902321258065e-40
ENSG00000086062	B4GALT1	9	cg04842962	6	43655489	63.75366958274864	0
ENSG00000086062	B4GALT1	9	cg13401071	1	49061762	-12.942093778165544	1.4480225200422191e-37
ENSG00000086062	B4GALT1	9	cg13407601	9	140615230	-8.405193252752728	5.853101090611748e-17
ENSG00000086062	B4GALT1	9	cg20290983	6	43655470	64.9832834285621	0
ENSG00000169925	BRD3	9	cg09256781	7	23145220	15.072473436824463	5.5541047882961e-50
ENSG00000169925	BRD3	9	cg09606090	17	46184889	13.35784271750624	7.441289839719165e-40
ENSG00000169925	BRD3	9	cg09836344	4	1243392	34.09670231519521	4.510076854376473e-224
ENSG00000169925	BRD3	9	cg10765909	12	53715428	24.33483981685867	3.792326581896803e-122
ENSG00000169925	BRD3	9	cg12583927	10	61469753	10.076778485473293	1.3304045737160196e-23
ENSG00000180539	C9orf139	9	cg03128972	17	19140659	6.943789476497144	4.435797160597799e-12
ENSG00000180539	C9orf139	9	cg16658931	19	51171061	17.24594041556767	2.4259683233511874e-64
ENSG00000183784	C9orf66	9	cg00339657	2	114194541	13.165122264913977	8.689277147776699e-39
ENSG00000165181	C9orf84	9	cg07018260	11	10536864	8.787039405955259	2.2335125761146143e-18
ENSG00000187796	CARD9	9	cg11586158	1	175013920	-7.30074697287568	3.434771660442138e-13
ENSG00000187796	CARD9	9	cg20907517	20	47894756	-8.072274060702133	9.04325886681043e-16
ENSG00000172785	CBWD1	9	cg05613063	2	114256454	10.422389979227296	4.0723275162157373e-25
ENSG00000172785	CBWD1	9	cg16839353	2	114256421	13.5080830383574	1.0613386580921758e-40
ENSG00000172785	CBWD1	9	cg21274067	2	114341111	-12.688273617583317	3.347504272384369e-36
ENSG00000197816	CCDC180	9	cg08081379	13	41496707	17.039160955578172	6.474642488829243e-63
ENSG00000197816	CCDC180	9	cg11608447	9	38620746	-6.99846049039279	3.018606808121365e-12
ENSG00000197816	CCDC180	9	cg17605235	9	38619909	-22.103001811795615	2.8955743921950637e-102
ENSG00000135047	CTSL	9	cg07336754	12	48921782	7.937859316643766	2.6439522615388845e-15
ENSG00000135047	CTSL	9	cg24436365	6	63940138	14.419326071853558	5.338472160703217e-46
ENSG00000233013	FAM157B	9	cg06370057	10	119786	-15.710635170405931	4.985672336688191e-54
ENSG00000165716	FAM69B	9	cg12632152	4	123748753	-9.439301057817707	6.190365795964678e-21
ENSG00000165716	FAM69B	9	cg12658129	18	19320803	-7.531273217298371	6.176905016083138e-14
ENSG00000165716	FAM69B	9	cg12661452	12	125550210	-8.407550513305596	5.752577057253748e-17
ENSG00000165716	FAM69B	9	cg12661964	17	41157777	-11.421259583658074	9.434591836129067e-30
ENSG00000187210	GCNT1	9	cg00894352	5	269864	-11.956094345287216	2.1148734340163555e-32
ENSG00000165702	GFI1B	9	cg05683445	16	28303182	7.279984990268732	3.9956053755218576e-13
ENSG00000165702	GFI1B	9	cg13662290	7	150264311	7.438227903685113	1.2406820345791684e-13
ENSG00000136935	GOLGA1	9	cg08577341	5	167001123	9.234105828303052	4.105952865245623e-20
ENSG00000125484	GTF3C4	9	cg21242079	15	79101063	8.7780246268852	2.4183077970201206e-18
ENSG00000148110	HIATL1	9	cg03269218	10	96990700	-22.365956296764534	1.5293539816715564e-104
ENSG00000148110	HIATL1	9	cg04578362	2	145592759	-11.133248945855893	2.2331436322443095e-28
ENSG00000148110	HIATL1	9	cg06570967	10	96989650	-17.26612307310435	1.6830926322348138e-64
ENSG00000148110	HIATL1	9	cg15229496	18	45939850	-13.869055376858244	9.24160709930324e-43
ENSG00000148110	HIATL1	9	cg15233961	10	96990543	-24.167199409777997	1.2954373879317264e-120
ENSG00000148110	HIATL1	9	cg15454820	10	96990858	-21.320042094868203	1.1853903402146306e-95
ENSG00000148110	HIATL1	9	cg16301728	2	187717549	-6.976503097246432	3.522142990160641e-12
ENSG00000148110	HIATL1	9	cg21522988	12	29376872	-8.26557463767898	1.8667807270146954e-16
ENSG00000148110	HIATL1	9	cg22186515	6	106533997	-7.770980018275564	9.816130943863022e-15
ENSG00000148110	HIATL1	9	cg22242585	2	216659791	-11.74490493377495	2.419617485512817e-31
ENSG00000148384	INPP5E	9	cg11586158	1	175013920	-22.140978753832552	1.462557922792982e-102
ENSG00000148384	INPP5E	9	cg12305805	4	93103551	-9.747108038313423	3.346209781667022e-22
ENSG00000106780	MEGF9	9	cg20963267	11	85568704	10.86860100542688	3.859243095552437e-27
ENSG00000095380	NANS	9	cg04902542	17	77920130	10.06439368682071	1.503812002074736e-23
ENSG00000136811	ODF2	9	cg01335566	1	6200312	-6.936103122549367	4.67992597338806e-12
ENSG00000160539	PPAPDC3	9	cg18638253	2	158485309	39.90874014304879	9.013340373917665e-294
ENSG00000160539	PPAPDC3	9	cg18638867	19	42784593	7.0882185705867045	1.5967085407423145e-12
ENSG00000160539	PPAPDC3	9	cg18644710	2	201172048	10.436640006484895	3.5240961413955654e-25
ENSG00000160539	PPAPDC3	9	cg18649979	19	21688263	13.857376255275968	1.0806295923161219e-42
ENSG00000160539	PPAPDC3	9	cg18651900	20	48553533	12.507046929998973	3.061262028866676e-35
ENSG00000160539	PPAPDC3	9	cg18652121	3	179322868	8.97881180238247	4.1161819919517744e-19
ENSG00000160539	PPAPDC3	9	cg18655928	19	19030652	8.752026643235956	3.030934786380951e-18
ENSG00000196422	PPP1R26	9	cg24140801	8	30588816	-9.126805492566184	1.0905387679001042e-19
ENSG00000095261	PSMD5	9	cg20963267	11	85568704	-11.590056769958572	1.4075516511211205e-30
ENSG00000095303	PTGS1	9	cg15693780	8	117543400	-7.690422282473674	1.8311483963700702e-14
ENSG00000095303	PTGS1	9	cg24278634	12	29409865	-7.506716547457343	7.420101266904182e-14
ENSG00000138835	RGS3	9	cg16187340	5	134527362	20.48447404369871	8.762219032167517e-89
ENSG00000235117	RP11-229P13.20	9	cg16658931	19	51171061	-8.423679765778223	5.0242885602956085e-17
ENSG00000148396	SEC16A	9	cg11586158	1	175013920	14.814019914662198	2.232143056642529e-48
ENSG00000167114	SLC27A4	9	cg10865363	17	75553599	-9.239121317422015	3.935059625231051e-20
ENSG00000157303	SUSD3	9	cg25557739	14	97744285	7.326103603323552	2.847828949790877e-13
ENSG00000165025	SYK	9	cg17392047	11	65247138	-10.06927521667502	1.4305286169860873e-23
ENSG00000136869	TLR4	9	cg02679172	2	137516269	7.684008033068917	1.923235761924526e-14
ENSG00000137038	TMEM261	9	cg02865593	15	25414716	7.819391015943254	6.725237434634172e-15
ENSG00000137038	TMEM261	9	cg24152845	15	25414763	7.526930297542393	6.369270564571447e-14
ENSG00000155158	TTC39B	9	cg01626918	12	75978785	-9.23750412963247	3.978055366057691e-20
ENSG00000165006	UBAP1	9	cg15483228	11	129685597	12.445693037222512	6.449859039640732e-35
ENSG00000107341	UBE2R2	9	cg05559398	11	129685425	8.578038978341674	1.3579967056599229e-17
ENSG00000107341	UBE2R2	9	cg14376988	9	99179801	10.536929215723774	1.255895755028821e-25
ENSG00000107341	UBE2R2	9	cg15483228	11	129685597	14.727998858694225	7.370344846241334e-48
ENSG00000107341	UBE2R2	9	cg18896967	11	129685428	11.10855132712394	2.9266117527231245e-28
ENSG00000196363	WDR5	9	cg15130459	5	40834228	7.522722377368669	6.579412388848044e-14
ENSG00000186130	ZBTB6	9	cg01321174	4	1041044	7.80265937916113	7.667600309113833e-15
ENSG00000186130	ZBTB6	9	cg07452164	7	72993570	8.81604497509103	1.732834512575175e-18
ENSG00000186130	ZBTB6	9	cg08231870	10	103070372	16.4665809559247	5.181785044388386e-59
ENSG00000186130	ZBTB6	9	cg09759458	19	480216	7.502407577360806	7.664747465513469e-14
ENSG00000186130	ZBTB6	9	cg10825234	4	1041061	8.210645318245895	2.9313587377282433e-16
ENSG00000186130	ZBTB6	9	cg11258452	12	119594454	13.636381773371031	1.993562904380282e-41
ENSG00000186130	ZBTB6	9	cg12645616	10	103070480	15.764802019871203	2.2202405857531777e-54
ENSG00000186130	ZBTB6	9	cg16819381	10	103070855	8.005440235540886	1.5436908884215868e-15
ENSG00000186130	ZBTB6	9	cg22511633	7	72993507	9.78799163958704	2.246625241073773e-22
ENSG00000186130	ZBTB6	9	cg23873525	10	103070221	13.176585851666836	7.525337198438775e-39
ENSG00000186130	ZBTB6	9	cg24472574	10	103070503	13.423420559956256	3.1848318382610914e-40
ENSG00000186130	ZBTB6	9	cg25221919	1	234845770	10.574985709615556	8.450321960524341e-26
ENSG00000136870	ZNF189	9	cg20554353	7	72839549	7.664000262998012	2.2433947957357156e-14
ENSG00000136754	ABI1	10	cg21119375	2	44393385	-10.21154350776109	3.46038974775529e-24
ENSG00000122359	ANXA11	10	cg16634718	10	52496341	-18.046124207004226	4.5339200688934694e-70
ENSG00000148655	C10orf11	10	cg02972559	1	45454343	8.43251382593089	4.6516136473016094e-17
ENSG00000148600	CDHR1	10	cg05233863	7	130743581	8.691343784209835	5.1252616215413615e-18
ENSG00000108094	CUL2	10	cg07371052	3	184528481	11.788981528153244	1.457754485463246e-31
ENSG00000151240	DIP2C	10	cg04242021	8	121137288	10.952956275751239	1.5652455279983702e-27
ENSG00000151240	DIP2C	10	cg07154754	12	132514292	9.330787501499119	1.687866656634864e-20
ENSG00000151640	DPYSL4	10	cg05100518	18	76277599	8.52389582087975	2.1510538086386034e-17
ENSG00000151640	DPYSL4	10	cg13401811	12	52345646	7.234637517039456	5.559542508953377e-13
ENSG00000107937	GTPBP4	10	cg23677780	14	94173060	-9.271711322311853	2.908062620337593e-20
ENSG00000152804	HHEX	10	cg20553394	11	64879336	-12.317160692110345	3.0025311012448647e-34
ENSG00000169813	HNRNPF	10	cg05295236	10	135192197	-9.730083618167784	3.9237729537218676e-22
ENSG00000169813	HNRNPF	10	cg05487635	10	28287999	-30.0843012972989	1.4561964536024699e-179
ENSG00000068383	INPP5A	10	cg12496411	7	87849561	-9.968183385006313	3.8879553858207426e-23
ENSG00000138160	KIF11	10	cg15605858	15	29395932	-7.436274068975504	1.2581844894556954e-13
ENSG00000138160	KIF11	10	cg20553394	11	64879336	-8.143853937020385	5.055426983503557e-16
ENSG00000107929	LARP4B	10	cg21586865	7	5230329	10.18144974908656	4.677899593258207e-24
ENSG00000107968	MAP3K8	10	cg00710870	7	102793411	13.248846634728212	2.9926403738371226e-39
ENSG00000165406	MARCH8	10	cg14286514	9	32525315	7.11759359706876	1.2940038730260627e-12
ENSG00000120539	MASTL	10	cg09039782	17	43662154	19.287569647774152	2.334861598350094e-79
ENSG00000120539	MASTL	10	cg15815349	17	30334793	8.047369525784172	1.10303790851312e-15
ENSG00000203791	METTL10	10	cg04522694	19	7598942	12.584744751078148	1.189265656182987e-35
ENSG00000148824	MTG1	10	cg22844232	3	193776047	-20.15956205726219	3.470834045532553e-86
ENSG00000173145	NOC3L	10	cg04839274	20	30160903	8.244951566312425	2.2116401286289243e-16
ENSG00000148572	NRBF2	10	cg14819942	15	35414228	-13.926022891031556	4.312893832041046e-43
ENSG00000108187	PBLD	10	cg04882175	6	131122610	-6.881329896306947	6.847932279429102e-12
ENSG00000175470	PPP2R2D	10	cg14141517	6	33538979	-12.406424172103323	1.0295135626542263e-34
ENSG00000171813	PWWP2B	10	cg26816583	1	8418613	12.36175995889829	1.7649947002213388e-34
ENSG00000152464	RPP38	10	cg08143688	14	52216704	7.971725140750887	2.0205024037685727e-15
ENSG00000198964	SGMS1	10	cg13365279	6	107390070	19.62792157707104	5.377131159463586e-82
ENSG00000198964	SGMS1	10	cg18558237	10	81444220	19.21472491809466	8.430538910495396e-79
ENSG00000198964	SGMS1	10	cg27420365	10	81444725	53.801447880641604	0
ENSG00000165752	STK32C	10	cg11911399	1	108742837	-19.481774046149692	7.4079969127292e-81
ENSG00000165752	STK32C	10	cg26816583	1	8418613	9.931086781584678	5.589794688447218e-23
ENSG00000165637	VDAC2	10	cg02972559	1	45454343	10.362125993246053	7.537473149852054e-25
ENSG00000062650	WAPAL	10	cg10273420	10	43953760	-7.9212969641125035	3.0155173157621113e-15
ENSG00000196793	ZNF239	10	cg11588903	19	17208493	7.017188368276276	2.6436887638236385e-12
ENSG00000196793	ZNF239	10	cg14024889	19	17633905	8.00231721017977	1.5826340565229903e-15
ENSG00000198105	ZNF248	10	cg03253629	4	105416336	7.134752520298674	1.1440461775821493e-12
ENSG00000198105	ZNF248	10	cg06457011	20	39767490	15.689346952757447	6.798552716524279e-54
ENSG00000198105	ZNF248	10	cg07893801	20	39767358	9.212350416720625	5.0060708001433247e-20
ENSG00000198105	ZNF248	10	cg08097417	7	130419133	12.199615118719786	1.2138658423328677e-33
ENSG00000198105	ZNF248	10	cg11150667	3	195595368	8.047080131823618	1.105175341513077e-15
ENSG00000198105	ZNF248	10	cg12307638	2	233323532	6.892085597526832	6.3528143967441755e-12
ENSG00000198105	ZNF248	10	cg13939234	4	120375997	-6.958620856868818	3.992429204370528e-12
ENSG00000198105	ZNF248	10	cg14361627	7	130419116	12.797648417548189	8.695569517134059e-37
ENSG00000198105	ZNF248	10	cg22094845	2	233324053	6.990289216262214	3.1958228717624862e-12
ENSG00000198105	ZNF248	10	cg22199969	2	233323840	9.940281627792222	5.103093704558965e-23
ENSG00000198105	ZNF248	10	cg23238134	2	233323718	8.311313458391156	1.278578322066485e-16
ENSG00000198105	ZNF248	10	cg23533926	12	111358616	-20.676413960370756	2.343106024795496e-90
ENSG00000198105	ZNF248	10	cg26181818	2	233323935	6.905933508345601	5.769397388646227e-12
ENSG00000110455	ACCS	11	cg02914427	16	29674184	16.4833076308068	4.003097407911236e-59
ENSG00000132744	ACY3	11	cg08371976	3	8725297	9.445142103100123	5.846645744609021e-21
ENSG00000006534	ALDH3B1	11	cg06786064	7	6894869	-11.385150217192118	1.4024900170312565e-29
ENSG00000006534	ALDH3B1	11	cg15600365	17	1420230	-25.469946305009103	8.791641832912809e-133
ENSG00000149089	APIP	11	cg10523494	17	72528386	-17.002629024043234	1.1450867493633651e-62
ENSG00000152219	ARL14EP	11	cg00316759	15	71407484	-7.8477442435947395	5.384751265026145e-15
ENSG00000152219	ARL14EP	11	cg27583138	6	24774877	-7.190935396865534	7.630769028955909e-13
ENSG00000152219	ARL14EP	11	cg27649194	12	1974168	-7.5600332881249885	4.9580278088318566e-14
ENSG00000133794	ARNTL	11	cg12261786	10	88727830	-8.739853122238577	3.367120836841786e-18
ENSG00000133794	ARNTL	11	cg14209784	10	88729861	-12.777610848679537	1.1144513771093975e-36
ENSG00000133794	ARNTL	11	cg23837265	10	88730407	-9.377791500302695	1.0921913875141875e-20
ENSG00000162174	ASRGL1	11	cg25505785	19	14181410	-9.697101578976737	5.401835789807734e-22
ENSG00000184743	ATL3	11	cg02178058	12	94533951	14.574482654727317	6.375700235858274e-47
ENSG00000174684	B3GNT1	11	cg05503627	12	26267490	-8.095607566412738	7.493777393986339e-16
ENSG00000149260	CAPN5	11	cg01441593	17	79818808	-18.291389836405532	7.328839643925927e-72
ENSG00000149260	CAPN5	11	cg01450204	11	11643690	-10.413025653233822	4.489200851761971e-25
ENSG00000149548	CCDC15	11	cg03800765	3	11313984	-10.846383671117062	4.893149807068786e-27
ENSG00000149548	CCDC15	11	cg03801128	16	77224772	-13.117508633595392	1.5971150894808873e-38
ENSG00000110172	CHORDC1	11	cg03701266	5	10649678	-9.586188806729007	1.5469498934047501e-21
ENSG00000110172	CHORDC1	11	cg20884098	2	74710615	-9.41853245776864	7.47419167199757e-21
ENSG00000150316	CWC15	11	cg01640437	11	65405484	27.949925608649195	2.7927034219613295e-157
ENSG00000110367	DDX6	11	cg24590990	2	234881435	-7.6903224034088975	1.8346695156823084e-14
ENSG00000110367	DDX6	11	cg27243560	12	25522335	-11.512386707612807	3.391143330693915e-30
ENSG00000177030	DEAF1	11	cg03520265	6	138785472	12.513455362131985	2.8617292357483224e-35
ENSG00000177030	DEAF1	11	cg06270737	6	138785358	16.856739325219383	1.2015606211248095e-61
ENSG00000187726	DNAJB13	11	cg26860703	11	6255872	-7.64415554241814	2.6142675416835943e-14
ENSG00000184545	DUSP8	11	cg06471548	7	192006	7.487212012016512	8.603110646780363e-14
ENSG00000051009	FAM160A2	11	cg12483561	17	72920385	-12.17842765935307	1.566433901377531e-33
ENSG00000158483	FAM86C1	11	cg16837680	8	8084974	-8.844336500145005	1.3529313242701592e-18
ENSG00000158483	FAM86C1	11	cg22076228	3	129831635	-24.696055639226145	1.6877092973802628e-125
ENSG00000149781	FERMT3	11	cg06690735	6	30294946	13.791022618183968	2.6494553780394083e-42
ENSG00000149262	INTS4	11	cg15584221	1	210546902	11.951121453069618	2.246184067167372e-32
ENSG00000182359	KBTBD3	11	cg01420011	5	175161230	18.18073825288921	4.695036540460936e-71
ENSG00000130592	LSP1	11	cg14652902	5	123571732	7.456033686086912	1.0860905832384328e-13
ENSG00000120458	MSANTD2	11	cg08409562	6	31737885	7.702017504552381	1.675125749167034e-14
ENSG00000120458	MSANTD2	11	cg12460175	22	18268062	6.883541653106524	6.743615654535531e-12
ENSG00000120458	MSANTD2	11	cg14086922	22	18268239	7.250201194850771	4.965228391474941e-13
ENSG00000120458	MSANTD2	11	cg15501231	6	31737630	8.441531235260921	4.315174810352628e-17
ENSG00000120458	MSANTD2	11	cg21463605	22	18268249	7.315246878570064	3.0845442487280477e-13
ENSG00000110583	NAA40	11	cg02178058	12	94533951	-45.18610285987442	0
ENSG00000151503	NCAPD3	11	cg18924493	11	506924	-7.560621425186879	4.937984601328579e-14
ENSG00000151503	NCAPD3	11	cg18971873	11	72525173	-7.632769010140164	2.8506653737184615e-14
ENSG00000021762	OSBPL5	11	cg16206836	20	36157266	16.7455521543965	6.752476599563112e-61
ENSG00000175115	PACS1	11	cg14189678	7	157690657	11.882174827459039	5.050477132320139e-32
ENSG00000175115	PACS1	11	cg26701943	11	108369231	-21.26405570095177	3.864680542050732e-95
ENSG00000177225	PDDC1	11	cg06097659	1	1141991	-9.889324738009119	8.443493382421811e-23
ENSG00000177225	PDDC1	11	cg21196724	5	178950855	23.740552988173715	1.1484447838776787e-116
ENSG00000110435	PDHX	11	cg10523494	17	72528386	21.59641810545747	5.7039381289830445e-98
ENSG00000073921	PICALM	11	cg24857958	1	80517010	11.271053331753471	4.9354904407767434e-29
ENSG00000176485	PLA2G16	11	cg02178058	12	94533951	12.215455770139778	1.0182407795952186e-33
ENSG00000166689	PLEKHA7	11	cg25961221	20	3775979	-8.813153585972827	1.7769374099927737e-18
ENSG00000137713	PPP2R1B	11	cg18187862	3	45730750	7.062328362973174	1.919984731230719e-12
ENSG00000167994	RAB3IL1	11	cg19683457	6	105307726	7.495965109224107	8.057405404895194e-14
ENSG00000048649	RSF1	11	cg13837552	12	112819996	7.925165635083798	2.925753034317568e-15
ENSG00000185187	SIGIRR	11	cg07325233	21	34638662	15.008291209312365	1.4146737388969856e-49
ENSG00000185187	SIGIRR	11	cg07554231	19	50083850	19.27427284801898	3.116869802837912e-79
ENSG00000185187	SIGIRR	11	cg10151737	6	170615854	35.685536935274364	2.140824594148848e-242
ENSG00000185187	SIGIRR	11	cg13139020	6	3000058	6.964853508468498	3.826471243075133e-12
ENSG00000185187	SIGIRR	11	cg14116222	17	79935202	17.341658914825185	5.147119012392321e-65
ENSG00000185187	SIGIRR	11	cg14414971	7	3340979	-7.775666185592149	9.479865344430609e-15
ENSG00000185187	SIGIRR	11	cg22741272	7	6460966	9.507014399659194	3.2806035059810746e-21
ENSG00000185187	SIGIRR	11	cg23062006	11	46940220	7.417917263616593	1.44484709389526e-13
ENSG00000130598	TNNI2	11	cg01710146	12	117348848	10.086873300787909	1.204099218766913e-23
ENSG00000110057	UNC93B1	11	cg08196758	22	25796782	-10.348650525975463	8.672832851927993e-25
ENSG00000160695	VPS11	11	cg07369507	6	28304287	10.381243150172077	6.225794802997998e-25
ENSG00000019102	VSIG2	11	cg15123187	1	20569715	-6.864482861392475	7.696150910138741e-12
ENSG00000166261	ZNF202	11	cg00514665	16	7703812	-7.2586628316172055	4.66730498894618e-13
ENSG00000166261	ZNF202	11	cg01050225	16	7703947	-7.16149877427963	9.44087165691266e-13
ENSG00000166261	ZNF202	11	cg02278912	14	45267997	-8.74495381217343	3.2225944630488543e-18
ENSG00000166261	ZNF202	11	cg03248761	13	81228965	-8.412974851974765	5.4824241303911565e-17
ENSG00000166261	ZNF202	11	cg03600259	6	164052180	-7.545819296513474	5.5240985860124e-14
ENSG00000166261	ZNF202	11	cg03689146	7	52341810	-7.321992608980408	2.9347555829233886e-13
ENSG00000166261	ZNF202	11	cg03986562	16	7703893	-7.378315337663164	1.9363796714650928e-13
ENSG00000166261	ZNF202	11	cg04008252	4	72897782	-7.593328836842385	3.8518343045659135e-14
ENSG00000166261	ZNF202	11	cg04391048	2	18766022	-7.555253538844528	5.14326835073549e-14
ENSG00000166261	ZNF202	11	cg05681560	6	164288814	-7.1157213661370635	1.3116307886862438e-12
ENSG00000166261	ZNF202	11	cg06385380	7	48887585	-7.298356246776611	3.49114024163435e-13
ENSG00000166261	ZNF202	11	cg06955417	7	16890879	-8.316771304802836	1.2225668178518027e-16
ENSG00000166261	ZNF202	11	cg14662585	7	16890769	-8.120304551492385	6.12174658141142e-16
ENSG00000166261	ZNF202	11	cg15078822	7	52341469	-7.0209720373113464	2.574203446171641e-12
ENSG00000166261	ZNF202	11	cg15750303	2	18765848	-7.819905559191234	6.7013317087065924e-15
ENSG00000166261	ZNF202	11	cg15867728	4	72898212	-7.566264841591625	4.731350223134e-14
ENSG00000166261	ZNF202	11	cg16004501	18	54814303	-7.553750806534524	5.202151513819947e-14
ENSG00000166261	ZNF202	11	cg16324992	7	16890431	-7.310098322423364	3.202882491049942e-13
ENSG00000166261	ZNF202	11	cg16877087	2	161504834	-7.146098184753943	1.0547491378678244e-12
ENSG00000166261	ZNF202	11	cg16919449	10	36054185	-8.329253458437579	1.1022853183657773e-16
ENSG00000166261	ZNF202	11	cg20152309	10	36054255	-8.738861568437073	3.3977723079765967e-18
ENSG00000166261	ZNF202	11	cg20289913	4	72897868	-8.052806668927937	1.0558500252369351e-15
ENSG00000166261	ZNF202	11	cg20581874	14	21191754	-9.46406882999056	4.890546821552138e-21
ENSG00000166261	ZNF202	11	cg20702390	2	18766018	-6.789084905053007	1.2934624757077477e-11
ENSG00000166261	ZNF202	11	cg21266330	4	72897698	-8.119586953598576	6.157463582631987e-16
ENSG00000166261	ZNF202	11	cg21482472	13	81229358	-8.28123961286567	1.6404451100215144e-16
ENSG00000166261	ZNF202	11	cg21540359	7	52341648	-8.02776805637519	1.2910553406965989e-15
ENSG00000166261	ZNF202	11	cg23513591	13	81229232	-8.233354826672151	2.433499426333401e-16
ENSG00000166261	ZNF202	11	cg23616527	17	50961649	-8.471410829630756	3.354071039330214e-17
ENSG00000166261	ZNF202	11	cg24536250	5	50218625	-9.016613636126547	2.9366674127186834e-19
ENSG00000166261	ZNF202	11	cg26012061	7	16890775	-7.912570694928213	3.232181141740574e-15
ENSG00000166261	ZNF202	11	cg26393629	14	21191859	-10.234343480000136	2.751712065733592e-24
ENSG00000166261	ZNF202	11	cg26512406	16	28223152	-8.758591840196818	2.8621284447376642e-18
ENSG00000166261	ZNF202	11	cg26617364	7	52342124	-7.248105014942625	5.040779493964019e-13
ENSG00000166261	ZNF202	11	cg26656113	4	72897613	-8.424053272420062	4.995998233357938e-17
ENSG00000166261	ZNF202	11	cg27241808	6	114180814	-7.600423536738598	3.649251983517087e-14
ENSG00000166261	ZNF202	11	cg27289227	13	90536270	-8.654398861480717	7.052753402247839e-18
ENSG00000081760	AACS	12	cg26973714	12	104609524	-12.429951704056364	7.750498032067237e-35
ENSG00000135503	ACVR1B	12	cg01727431	1	871057	-7.957131536554004	2.2711255176251854e-15
ENSG00000135503	ACVR1B	12	cg02439789	1	871441	-10.733665823067966	1.6129362044178934e-26
ENSG00000135503	ACVR1B	12	cg05527507	1	861265	-8.26014811526942	1.9535692112405056e-16
ENSG00000135503	ACVR1B	12	cg06531475	1	870791	-8.851367617905161	1.2724755486335252e-18
ENSG00000135503	ACVR1B	12	cg06624358	1	870810	-8.012561942398943	1.4592942461970092e-15
ENSG00000135503	ACVR1B	12	cg10146935	1	871308	-10.612226421785564	5.750696376297152e-26
ENSG00000135503	ACVR1B	12	cg12634245	6	10495364	-8.267582066357114	1.8374732288902325e-16
ENSG00000135503	ACVR1B	12	cg20139336	6	10495435	-8.331546683008776	1.0823021963296387e-16
ENSG00000135503	ACVR1B	12	cg23664396	1	23895366	-8.81346295424928	1.7744411038359475e-18
ENSG00000135503	ACVR1B	12	cg24362661	1	871546	-10.823801002910317	6.223955315288805e-27
ENSG00000135503	ACVR1B	12	cg24997886	1	871033	-8.194371643456384	3.3517983266806256e-16
ENSG00000135503	ACVR1B	12	cg25602536	2	8816608	-8.860928446805065	1.1698551095125411e-18
ENSG00000139567	ACVRL1	12	cg13577407	3	57994372	8.407234645607048	5.75700779331201e-17
ENSG00000176915	ANKLE2	12	cg07570055	2	233387088	-10.132576332540584	7.640024345701093e-24
ENSG00000176915	ANKLE2	12	cg16072664	21	35014885	-7.954571632388527	2.31754435544629e-15
ENSG00000176915	ANKLE2	12	cg26860994	7	127292223	-7.502226681649798	7.679002273856415e-14
ENSG00000123395	C12orf44	12	cg14316668	21	44375471	15.842856780551534	6.998886768427024e-55
ENSG00000120860	CCDC53	12	cg01777103	8	145550585	-10.896230218018099	2.8716872589063995e-27
ENSG00000111276	CDKN1B	12	cg18041893	7	104869189	11.67740225058448	5.227274726942452e-31
ENSG00000150048	CLEC1A	12	cg09212610	15	90892496	-8.870208968346699	1.077974301073339e-18
ENSG00000135678	CPM	12	cg00367515	8	57230584	19.275180300141766	2.907345764618219e-79
ENSG00000013573	DDX11	12	cg02734259	12	9559402	10.315637503345945	1.209877507404777e-24
ENSG00000013573	DDX11	12	cg05840127	12	3181055	12.22917000574545	8.564533699238178e-34
ENSG00000013573	DDX11	12	cg06692784	12	9600756	-9.907882069501651	7.011681371669322e-23
ENSG00000013573	DDX11	12	cg07721440	12	9601161	-18.311386890628505	5.189746666637569e-72
ENSG00000013573	DDX11	12	cg15883249	12	13028664	9.934560372685956	5.401268778509337e-23
ENSG00000013573	DDX11	12	cg16269447	12	9600801	9.467867267976178	4.71912597001952e-21
ENSG00000112787	FBRSL1	12	cg04991071	3	71615924	-22.199466991241746	4.3090112080318214e-103
ENSG00000111711	GOLT1B	12	cg21564445	7	105220714	-7.776184547601013	9.424380992542492e-15
ENSG00000127311	HELB	12	cg14585797	9	99262208	-7.493152990070642	8.216500345195837e-14
ENSG00000198353	HOXC4	12	cg22454564	20	29549396	-7.673919274523513	2.0813783161881827e-14
ENSG00000123411	IKZF4	12	cg12139329	15	63481838	-11.696941732697661	4.204702214719176e-31
ENSG00000120645	IQSEC3	12	cg11857025	1	109633344	-20.970976918723878	9.215455646096981e-93
ENSG00000120645	IQSEC3	12	cg13149600	21	43374220	15.105665696287925	3.434736890272142e-50
ENSG00000120645	IQSEC3	12	cg24316515	8	63160853	-11.76858422278214	1.8445703649470025e-31
ENSG00000135643	KCNMB4	12	cg02447287	2	238707023	7.969311981320018	2.059335140778594e-15
ENSG00000134539	KLRD1	12	cg09212610	15	90892496	16.615119074556123	5.19844527164441e-60
ENSG00000226091	LINC00937	12	cg19844110	4	9533426	7.615836315989781	3.245441109362778e-14
ENSG00000003056	M6PR	12	cg02879784	3	128880367	-8.419293295746654	5.2019749829452236e-17
ENSG00000166987	MBD6	12	cg11155082	12	109915172	9.436231983297647	6.356189857886741e-21
ENSG00000139160	METTL20	12	cg11582223	11	308126	-10.376028665185904	6.548537657608514e-25
ENSG00000175727	MLXIP	12	cg16834708	12	25403986	-6.899560698272413	6.036032266978129e-12
ENSG00000198598	MMP17	12	cg26663686	8	144241809	19.638857967856353	4.4814517584476916e-82
ENSG00000198015	MRPL42	12	cg00223950	1	19536222	-16.002228437733496	6.295284560291116e-56
ENSG00000187109	NAP1L1	12	cg07613588	20	32229383	-10.931078333301171	1.979123491301836e-27
ENSG00000136045	PWP1	12	cg25346576	17	28443852	-11.082044904474538	3.8984393051912066e-28
ENSG00000004700	RECQL	12	cg04279164	11	106698694	-9.3526891905709	1.3784436089622335e-20
ENSG00000166532	RIMKLB	12	cg15902621	4	159579631	8.834678086821913	1.4729344537873474e-18
ENSG00000139405	RITA1	12	cg10074413	8	52320799	-10.968480202678009	1.3273731045877695e-27
ENSG00000139405	RITA1	12	cg13266630	7	94285327	-8.210953664624393	2.925201101969923e-16
ENSG00000256576	RP13-977J11.2	12	cg04063589	5	134871973	-15.042414176239781	8.553727304491214e-50
ENSG00000061936	SFSWAP	12	cg11456303	2	131509767	-14.404902827338516	6.556512520417419e-46
ENSG00000061936	SFSWAP	12	cg12214695	10	43048337	7.15630349237251	9.80201770651385e-13
ENSG00000139370	SLC15A4	12	cg03118206	6	138482933	-10.000800347425745	2.814658422200191e-23
ENSG00000139372	TDG	12	cg13813533	9	114290738	13.178986180428998	7.302540553451289e-39
ENSG00000111669	TPI1	12	cg12902497	1	8938815	7.133036392107154	1.159937149664894e-12
ENSG00000111647	UHRF1BP1L	12	cg08398034	16	66412919	-7.452007170934235	1.1183816199355788e-13
ENSG00000060237	WNK1	12	cg26280097	6	33177714	9.777085157924766	2.4974543692574447e-22
ENSG00000256223	ZNF10	12	cg27325820	5	166582608	7.02962484745938	2.421420688560831e-12
ENSG00000090612	ZNF268	12	cg11207515	7	146904205	9.634160783013261	9.822684644916826e-22
ENSG00000090612	ZNF268	12	cg11820154	8	29732714	11.249810844097727	6.240874987396853e-29
ENSG00000090612	ZNF268	12	cg15448366	1	223303049	6.837569550266977	9.268357534842923e-12
ENSG00000090612	ZNF268	12	cg26668744	7	159127977	-7.035151705323292	2.3284700207449176e-12
ENSG00000088448	ANKRD10	13	cg05225581	13	41706923	14.153407546420848	2.025493985067456e-44
ENSG00000088448	ANKRD10	13	cg18241387	7	84494975	-7.175256605631624	8.547814031885409e-13
ENSG00000102606	ARHGEF7	13	cg02959866	2	26364971	14.690620705387511	1.2347760904966384e-47
ENSG00000068650	ATP11A	13	cg02309882	5	85940883	27.261079472551756	2.51130354579095e-150
ENSG00000123191	ATP7B	13	cg18335740	13	41363409	7.7724477326759915	9.705788738618357e-15
ENSG00000150401	DCUN1D2	13	cg00026974	17	42298151	7.973342322426778	1.9955106266007552e-15
ENSG00000150401	DCUN1D2	13	cg06185924	10	27529785	-9.578957666616155	1.6595689793738306e-21
ENSG00000150401	DCUN1D2	13	cg07318453	4	74124502	-14.029871907740976	1.0786570265833933e-43
ENSG00000150401	DCUN1D2	13	cg07368265	1	219375142	17.87803887297728	7.550096300616446e-69
ENSG00000150401	DCUN1D2	13	cg09065654	3	183948302	9.736959541675525	3.676951716230001e-22
ENSG00000150401	DCUN1D2	13	cg12904880	6	30139832	-8.153981527642047	4.658213253034395e-16
ENSG00000183087	GAS6	13	cg01286935	16	89778247	8.663032622551546	6.549708002946056e-18
ENSG00000183087	GAS6	13	cg06683021	4	9475346	-18.80397643221974	1.1244109961627112e-75
ENSG00000183087	GAS6	13	cg09065654	3	183948302	7.9661300139522115	2.1133801053582667e-15
ENSG00000183087	GAS6	13	cg11088422	17	42392697	9.60571559100854	1.287657775660219e-21
ENSG00000183087	GAS6	13	cg14441964	10	75910358	7.053824790254517	2.0398291054242115e-12
ENSG00000183087	GAS6	13	cg19204194	4	110736315	10.292880415056018	1.5249442172596576e-24
ENSG00000183087	GAS6	13	cg23097155	12	133066069	7.410662677313016	1.5232573677817557e-13
ENSG00000188342	GTF2F2	13	cg10316527	15	82242305	-9.133877332951212	1.0216218495547903e-19
ENSG00000102445	KIAA0226L	13	cg08475853	4	9492758	-15.274109063330556	3.0106090498583873e-51
ENSG00000102445	KIAA0226L	13	cg20897026	13	64416816	24.15668486023518	1.5758908121736433e-120
ENSG00000102554	KLF5	13	cg01765653	6	29599160	8.164531407529642	4.271476685981642e-16
ENSG00000102554	KLF5	13	cg03127104	6	29599250	8.793193024883927	2.1154778162743976e-18
ENSG00000102554	KLF5	13	cg04109092	7	2647852	6.870719244804056	7.368195050963158e-12
ENSG00000102554	KLF5	13	cg04654167	6	158090949	8.62614456101116	8.986452466907299e-18
ENSG00000102554	KLF5	13	cg04890576	17	73032613	7.2251105074226345	5.957178058136638e-13
ENSG00000102554	KLF5	13	cg05234415	19	38743744	8.434471631462952	4.5753766316635405e-17
ENSG00000102554	KLF5	13	cg06519422	6	29599226	8.731377144259746	3.62395244671893e-18
ENSG00000102554	KLF5	13	cg08305533	22	32007224	7.934804807714592	2.7091492183367424e-15
ENSG00000102554	KLF5	13	cg08360599	3	141087261	7.272143483020709	4.228620608176925e-13
ENSG00000102554	KLF5	13	cg11276093	10	95123774	6.784355536146555	1.3357828896766522e-11
ENSG00000102554	KLF5	13	cg12467226	3	13694484	7.204301604211367	6.927929930217946e-13
ENSG00000102554	KLF5	13	cg12991385	6	29599259	8.17741856478053	3.8453532209332074e-16
ENSG00000102554	KLF5	13	cg13620499	9	136353126	7.169310543850132	8.921744715648934e-13
ENSG00000102554	KLF5	13	cg13790576	9	139640661	6.965275122981308	3.8103250742601536e-12
ENSG00000102554	KLF5	13	cg16313758	7	2647039	6.942471834376636	4.470610030484156e-12
ENSG00000102554	KLF5	13	cg17806418	6	29599319	8.40969483100363	5.632592707673369e-17
ENSG00000102554	KLF5	13	cg18503234	11	68847839	7.16276311547926	9.352939506761218e-13
ENSG00000102554	KLF5	13	cg20139800	6	29599178	8.215676474046962	2.812171154983497e-16
ENSG00000102554	KLF5	13	cg20588285	21	45707344	7.327585640962757	2.815658878465651e-13
ENSG00000102554	KLF5	13	cg21370924	3	141087313	7.073370134634692	1.7744134259098634e-12
ENSG00000102554	KLF5	13	cg21644740	6	29599248	8.863968392515456	1.1372408487783179e-18
ENSG00000102554	KLF5	13	cg22573359	17	8645026	7.808236675630185	7.339018098285957e-15
ENSG00000102554	KLF5	13	cg22679406	6	29599331	8.824332209777129	1.6108721107659355e-18
ENSG00000102554	KLF5	13	cg23068772	7	30737061	7.2767839417002715	4.08756081701511e-13
ENSG00000102554	KLF5	13	cg23469878	9	139640884	7.319569622413643	2.986717240660509e-13
ENSG00000102554	KLF5	13	cg24709951	17	73033009	8.10353019040059	7.009791000675861e-16
ENSG00000102554	KLF5	13	cg27172175	17	41495032	7.363383053965127	2.16208589667982e-13
ENSG00000260910	LINC00565	13	cg01286935	16	89778247	11.258075069481851	5.70151788110836e-29
ENSG00000260910	LINC00565	13	cg01594514	11	67374213	-10.082471483835823	1.2569121864470365e-23
ENSG00000260910	LINC00565	13	cg05128566	7	95401838	11.703485023310343	3.8861227871758967e-31
ENSG00000260910	LINC00565	13	cg05744487	11	18720220	-11.49530538925333	4.0902225776354326e-30
ENSG00000260910	LINC00565	13	cg11088422	17	42392697	9.235286524791306	4.063660931766341e-20
ENSG00000260910	LINC00565	13	cg12642006	16	11350118	-10.542704014746409	1.1819431904398169e-25
ENSG00000260910	LINC00565	13	cg20197516	17	80373348	10.08772478117157	1.1930167870132576e-23
ENSG00000260910	LINC00565	13	cg23325670	19	17337031	-15.803896509603986	1.2443474469407759e-54
ENSG00000260910	LINC00565	13	cg26829322	1	11713867	-10.084210016847141	1.2353998959668041e-23
ENSG00000122033	MTIF3	13	cg05079548	7	128337621	10.581044635434758	7.938111250349916e-26
ENSG00000122033	MTIF3	13	cg12437277	1	228743235	12.168901918254777	1.749099181401399e-33
ENSG00000122033	MTIF3	13	cg13248778	7	128337725	-12.161450422468693	1.910033492133413e-33
ENSG00000122033	MTIF3	13	cg17477090	1	228743373	12.712471495987714	2.4923149779744766e-36
ENSG00000122033	MTIF3	13	cg17964975	7	128337483	16.227114634155516	2.0683071380123524e-57
ENSG00000122033	MTIF3	13	cg22700015	1	228743131	10.020475074487754	2.321000586998495e-23
ENSG00000120662	MTRF1	13	cg09899636	12	8599671	-11.937380831412815	2.6324782806565144e-32
ENSG00000136098	NEK3	13	cg18335740	13	41363409	-12.863526958941739	3.85375319730806e-37
ENSG00000102699	PARP4	13	cg10328297	13	41366576	10.186910091433376	4.429490829745201e-24
ENSG00000121390	PSPC1	13	cg02624129	11	130786230	8.480553316841778	3.104489786109428e-17
ENSG00000133104	SPG20	13	cg14361741	9	71685390	7.046995303146683	2.1403346533547375e-12
ENSG00000165416	SUGT1	13	cg18335740	13	41363409	-47.368728576902406	0
ENSG00000136100	VPS36	13	cg18335740	13	41363409	-8.360681225550563	8.488509180299793e-17
ENSG00000185100	ADSSL1	14	cg18809122	2	191513153	8.167011158453771	4.1915201155385527e-16
ENSG00000198513	ATL1	14	cg26929161	20	50701266	7.400557693159213	1.6425702070211903e-13
ENSG00000140104	C14orf79	14	cg02143877	20	52790141	11.004736926728409	8.999993901212986e-28
ENSG00000140104	C14orf79	14	cg10962261	2	217277064	18.086904210742162	2.3266509085564932e-70
ENSG00000198752	CDC42BPB	14	cg10064079	20	44600917	8.468814327316073	3.43189701972955e-17
ENSG00000100490	CDKL1	14	cg23101093	5	42941518	-8.485916300535957	2.9698489753976287e-17
ENSG00000099814	CEP170B	14	cg02143877	20	52790141	20.650264002996263	3.987302888451087e-90
ENSG00000187630	DHRS4L2	14	cg23972409	3	160282398	-7.408059116816618	1.5551914924275585e-13
ENSG00000119686	FLVCR2	14	cg03967192	2	10861604	-9.529148368913892	2.656807631390078e-21
ENSG00000215271	HOMEZ	14	cg12545949	6	71571446	6.816571618785253	1.0722491684977277e-11
ENSG00000215271	HOMEZ	14	cg18912768	2	169887819	7.346014861384974	2.4624711116415217e-13
ENSG00000258701	LINC00638	14	cg03619075	16	858499	-7.170011811863115	8.88338957016903e-13
ENSG00000258701	LINC00638	14	cg10071602	16	2028740	-7.906695414100664	3.3884062621428066e-15
ENSG00000258701	LINC00638	14	cg26395761	7	107700124	-24.21920667536295	4.5461016975589025e-121
ENSG00000214548	MEG3	14	cg00642460	5	176827697	6.8880696705534845	6.533494626528079e-12
ENSG00000214548	MEG3	14	cg01142302	3	9988590	7.883498254328945	4.0660280342750004e-15
ENSG00000214548	MEG3	14	cg02725398	3	9988144	9.224445292865493	4.48457167458649e-20
ENSG00000214548	MEG3	14	cg05783384	2	218843735	8.429789393243281	4.7603895669489765e-17
ENSG00000214548	MEG3	14	cg07616871	2	218843504	7.450004731793152	1.1355822041054811e-13
ENSG00000214548	MEG3	14	cg07865091	1	43814306	8.17819505672275	3.8221203234059387e-16
ENSG00000214548	MEG3	14	cg08706567	1	43814983	9.31188376737581	2.009987068959162e-20
ENSG00000214548	MEG3	14	cg11839415	1	43814764	9.038230224355658	2.4193663282523163e-19
ENSG00000214548	MEG3	14	cg13393721	1	43815035	9.32028100885157	1.8602018405719898e-20
ENSG00000214548	MEG3	14	cg19337279	1	43804317	-7.054265349080849	2.03297986153691e-12
ENSG00000214548	MEG3	14	cg20225999	2	218843435	7.854327057384237	5.115522533695389e-15
ENSG00000214548	MEG3	14	cg21279996	1	43815465	7.329846752468493	2.7696745583042927e-13
ENSG00000080823	MOK	14	cg22912732	8	48910636	-8.336021651383751	1.0421825598905128e-16
ENSG00000169413	RNASE6	14	cg26512406	16	28223152	10.104480553513957	1.0115627049900222e-23
ENSG00000092108	SCFD1	14	cg11248957	10	15963599	-10.574005923325887	8.536697356632526e-26
ENSG00000042317	SPATA7	14	cg18511212	10	38715824	-13.694553504998852	9.273813157235972e-42
ENSG00000156414	TDRD9	14	cg04914231	16	30006637	-7.1674917656187205	9.047049874101293e-13
ENSG00000165548	TMEM63C	14	cg07769176	16	88878414	-9.334890520839938	1.6271681991188107e-20
ENSG00000104043	ATP8B4	15	cg05119988	4	166251189	-6.869504235870487	7.431793148272792e-12
ENSG00000104043	ATP8B4	15	cg09491962	10	98900771	-6.84571346997065	8.761161257631928e-12
ENSG00000104043	ATP8B4	15	cg14660676	8	126012434	-6.786035530793498	1.3207232349046471e-11
ENSG00000104043	ATP8B4	15	cg16000331	22	42230138	-7.203467709381209	6.971382476868274e-13
ENSG00000104043	ATP8B4	15	cg17901584	1	55353706	-6.8814729385389235	6.83992546161035e-12
ENSG00000104043	ATP8B4	15	cg19268652	6	12119552	-7.799406386873347	7.865284717920693e-15
ENSG00000104043	ATP8B4	15	cg19751789	19	11199944	-8.85097147884759	1.2755849285416005e-18
ENSG00000128891	C15orf57	15	cg01027929	7	26241406	-41.72589906525249	2.0326851e-316
ENSG00000128891	C15orf57	15	cg13881513	18	2652797	11.354730582780503	1.9662641658037613e-29
ENSG00000128891	C15orf57	15	cg14565914	7	26252611	-22.14810282946048	1.210500355156787e-102
ENSG00000187446	CHP1	15	cg06757784	15	66994613	-6.8503513302638	8.49025799995383e-12
ENSG00000259363	CTD-2054N24.2	15	cg26826117	15	85116902	7.215388185954623	6.394760813837707e-13
ENSG00000035664	DAPK2	15	cg11875268	12	54576025	12.956442538288849	1.2137223819392398e-37
ENSG00000128829	EIF2AK4	15	cg01299945	6	43966762	9.822031880561692	1.618559620084458e-22
ENSG00000128829	EIF2AK4	15	cg08335892	12	95774442	9.066649436778183	1.8764897494123713e-19
ENSG00000128829	EIF2AK4	15	cg22705835	10	65332833	-27.499071143769655	1.0842434675920234e-152
ENSG00000185442	FAM174B	15	cg04533189	17	64298763	-7.2688636626737635	4.331003928036963e-13
ENSG00000185442	FAM174B	15	cg17468987	17	46688448	-23.288686371117812	1.1417559630863596e-112
ENSG00000185442	FAM174B	15	cg17522935	19	40906607	-10.117049533744513	8.897571720561553e-24
ENSG00000182511	FES	15	cg05270106	3	127997992	-9.00621082827329	3.226137351644006e-19
ENSG00000182511	FES	15	cg06853376	5	125937059	10.68165902924016	2.7846511895637053e-26
ENSG00000140564	FURIN	15	cg22843129	8	669177	15.117437679393841	2.924626394163642e-50
ENSG00000175265	GOLGA8A	15	cg05269678	7	5643158	15.45158632214663	2.277183130544777e-52
ENSG00000175265	GOLGA8A	15	cg06969129	7	5645984	9.75718985833721	3.0245673930079384e-22
ENSG00000140307	GTF2A2	15	cg19119119	12	49760396	6.789279552794198	1.2916950264026894e-11
ENSG00000140545	MFGE8	15	cg14182819	20	48628662	-8.26169315923048	1.9281606041684975e-16
ENSG00000069869	NEDD4	15	cg06723301	22	21213449	-9.402877665328331	8.652127171386582e-21
ENSG00000166821	PEX11A	15	cg13314081	15	56342834	-7.465599632642127	1.010978299201274e-13
ENSG00000166821	PEX11A	15	cg23841819	1	204970383	-25.17561475973441	5.351860763284119e-130
ENSG00000243708	PLA2G4B	15	cg01560972	11	8190837	7.103953765998693	1.4274895966782735e-12
ENSG00000243708	PLA2G4B	15	cg01601299	3	128745637	8.392183481692197	6.530298843576549e-17
ENSG00000243708	PLA2G4B	15	cg09243021	7	142985019	7.003548446788583	2.9125440049751133e-12
ENSG00000243708	PLA2G4B	15	cg10504436	22	24180492	8.068846150807401	9.28608436801973e-16
ENSG00000243708	PLA2G4B	15	cg13176979	6	79944654	6.889845487348935	6.456385766309202e-12
ENSG00000243708	PLA2G4B	15	cg16190211	19	10590009	7.405222793346199	1.5866714502451143e-13
ENSG00000243708	PLA2G4B	15	cg19542048	19	10590162	8.378649227649884	7.312128936955413e-17
ENSG00000243708	PLA2G4B	15	cg20595215	3	8543014	7.815448250263451	6.943578019862603e-15
ENSG00000137841	PLCB2	15	cg17533455	5	130599827	15.558156724843233	4.794008578705529e-53
ENSG00000041357	PSMA4	15	cg26414235	15	34877407	7.030595246224845	2.4046558928969028e-12
ENSG00000248508	SRP14-AS1	15	cg22705835	10	65332833	16.873188158948974	9.032575291069037e-62
ENSG00000180953	ST20	15	cg22388260	16	14403138	11.805253299409133	1.211029309073322e-31
ENSG00000185418	TARSL2	15	cg22865050	19	11457020	13.466232221133643	1.8294445862707174e-40
ENSG00000167202	TBC1D2B	15	cg13745513	9	131018379	-18.53169640839052	1.2234040376907429e-73
ENSG00000129003	VPS13C	15	cg03019505	22	26898513	7.34860662210843	2.411269297267348e-13
ENSG00000162066	AMDHD2	16	cg13063040	8	145669623	-10.261206228071735	2.115042202711075e-24
ENSG00000167522	ANKRD11	16	cg06774039	2	74056087	14.666341179917334	1.768824846339842e-47
ENSG00000167522	ANKRD11	16	cg18515585	11	9113190	16.291362397737853	7.929463340931124e-58
ENSG00000103326	CAPN15	16	cg01804343	7	73134065	-9.057236619131686	2.047886669826043e-19
ENSG00000103326	CAPN15	16	cg07702548	16	88636912	6.973756674042912	3.5955227197192414e-12
ENSG00000129993	CBFA2T3	16	cg04377525	19	2977344	10.853148793573542	4.5699750763070475e-27
ENSG00000129993	CBFA2T3	16	cg08993172	11	44327267	-6.9925744671368255	3.1482477164896467e-12
ENSG00000135736	CCDC102A	16	cg04924309	16	75551481	8.304531172473137	1.3550668494671184e-16
ENSG00000162063	CCNF	16	cg20834643	3	50122624	-7.847232615895015	5.424512610995888e-15
ENSG00000131165	CHMP1A	16	cg03958163	10	105615502	7.37384807578422	2.0035781057879757e-13
ENSG00000131165	CHMP1A	16	cg13698153	12	118541722	7.848877738854928	5.34686206920076e-15
ENSG00000103196	CRISPLD2	16	cg00252594	14	102974737	13.884091864566116	7.59404700292418e-43
ENSG00000103196	CRISPLD2	16	cg15951107	19	49458367	-7.300990095239018	3.4254135635830845e-13
ENSG00000174177	CTU2	16	cg08118649	12	99038419	11.881642032665258	5.049597161146798e-32
ENSG00000003249	DBNDD1	16	cg26114043	4	128544375	13.353920003402868	7.848366101725759e-40
ENSG00000167968	DNASE1L2	16	cg05456948	10	135171583	-14.662992604797703	1.8803435791233263e-47
ENSG00000167968	DNASE1L2	16	cg09818588	4	84406319	-13.59048273298763	3.7238621401798827e-41
ENSG00000167968	DNASE1L2	16	cg14409810	9	140172908	-11.302761915187084	3.5217834672671416e-29
ENSG00000167968	DNASE1L2	16	cg14859047	3	134514116	-7.9181630247429595	3.1010537222175936e-15
ENSG00000205047	FLJ00104	16	cg20228509	11	68609166	-10.218249026875988	3.2364666185605476e-24
ENSG00000059122	FLYWCH1	16	cg02910769	3	180546119	-13.119946832911616	1.569920802466139e-38
ENSG00000141013	GAS8	16	cg17268033	10	95363	19.06372479031531	1.2298539039465963e-77
ENSG00000141013	GAS8	16	cg18696576	6	34203630	-16.19479869093976	3.4253514331285264e-57
ENSG00000141013	GAS8	16	cg22237459	1	206680720	-12.911012211606096	2.1415710753500264e-37
ENSG00000141013	GAS8	16	cg26114043	4	128544375	-29.178174945634634	6.338133551791625e-170
ENSG00000006007	GDE1	16	cg16248798	1	247271246	11.958394291535527	2.0634581767763483e-32
ENSG00000166123	GPT2	16	cg05429374	16	33481620	7.724654669434583	1.4057601231992215e-14
ENSG00000230989	HSBP1	16	cg04640885	2	145273345	-18.80412990472527	1.115609832354958e-75
ENSG00000047578	KIAA0556	16	cg21317088	18	48724267	-7.652789035170975	2.4463721507446556e-14
ENSG00000104731	KLHDC4	16	cg01577292	8	143696144	-8.520162091448437	2.2217270527536628e-17
ENSG00000104731	KLHDC4	16	cg02870950	10	46168231	9.94279458700241	4.987844749200891e-23
ENSG00000104731	KLHDC4	16	cg17878506	13	76056784	-9.600076439171309	1.358778580505224e-21
ENSG00000104731	KLHDC4	16	cg18645906	4	15704599	10.665202998365814	3.3055807312827993e-26
ENSG00000104731	KLHDC4	16	cg22109262	4	17578738	22.633554124929134	7.34525421749218e-107
ENSG00000104731	KLHDC4	16	cg23890506	1	155023350	22.32027732943992	3.874731258215729e-104
ENSG00000104731	KLHDC4	16	cg25749165	10	75634242	7.930912146444594	2.7961626555757213e-15
ENSG00000087253	LPCAT2	16	cg03495059	16	30913719	12.344294274137019	2.169731162455254e-34
ENSG00000258839	MC1R	16	cg01026373	5	141071769	7.130324216695467	1.1818573567142627e-12
ENSG00000258839	MC1R	16	cg21302420	1	112162376	9.190376520807375	6.128461430172888e-20
ENSG00000258839	MC1R	16	cg24644049	4	85504048	13.487102068351819	1.405954264924267e-40
ENSG00000103313	MEFV	16	cg06952873	6	28059208	7.363785927923899	2.158853222168629e-13
ENSG00000103313	MEFV	16	cg09156207	6	28058724	7.574501729372298	4.4505958946003966e-14
ENSG00000103313	MEFV	16	cg15146567	3	42948626	6.920918716781612	5.203266148734308e-12
ENSG00000103313	MEFV	16	cg17944885	19	12225735	7.14796202098365	1.0418265482309285e-12
ENSG00000074071	MRPS34	16	cg15993354	19	12912590	-8.879810079631914	9.93015193633185e-19
ENSG00000122390	NAA60	16	cg17171325	3	10052813	-18.982585359364705	5.2751314920308604e-77
ENSG00000140853	NLRC5	16	cg00340855	6	30458586	-9.563250461532318	1.9290847741597278e-21
ENSG00000140853	NLRC5	16	cg00533183	6	32810742	-7.925893556298835	2.9121606822983283e-15
ENSG00000140853	NLRC5	16	cg01064373	6	31238245	-9.193045704993278	5.986578002048878e-20
ENSG00000140853	NLRC5	16	cg01082299	6	31431969	-15.380977146717122	6.4968129588793864e-52
ENSG00000140853	NLRC5	16	cg01309328	6	32811253	-9.148708140620972	8.956735440280386e-20
ENSG00000140853	NLRC5	16	cg01405582	6	29692365	-17.099734253449355	2.4970255436035905e-63
ENSG00000140853	NLRC5	16	cg01517384	6	31323856	-8.29645039745516	1.448781155889305e-16
ENSG00000140853	NLRC5	16	cg02188225	6	30459255	-7.546648231214525	5.495156313896241e-14
ENSG00000140853	NLRC5	16	cg05201185	6	30459139	-10.728282838058481	1.7103621583966918e-26
ENSG00000140853	NLRC5	16	cg05358170	6	29692399	-13.105495527286743	1.8705770244261188e-38
ENSG00000140853	NLRC5	16	cg07148697	6	31323253	-9.500562645149568	3.482085945886137e-21
ENSG00000140853	NLRC5	16	cg08099136	6	32811251	-7.79283113122777	8.289395129979073e-15
ENSG00000140853	NLRC5	16	cg08818207	6	32820355	-8.7456726349497	3.2083316432934805e-18
ENSG00000140853	NLRC5	16	cg10601943	6	29692824	-11.193382509990498	1.1639951344321984e-28
ENSG00000140853	NLRC5	16	cg11019014	6	30460798	-7.249704871348593	4.986702750901845e-13
ENSG00000140853	NLRC5	16	cg11187245	6	31323397	-12.50252616471637	3.2548451779950717e-35
ENSG00000140853	NLRC5	16	cg11247343	6	31237824	-7.606960890218047	3.475537843196599e-14
ENSG00000140853	NLRC5	16	cg11587584	6	29692372	-17.076100934527354	3.642998400909842e-63
ENSG00000140853	NLRC5	16	cg11594821	6	30458601	-8.422641051880593	5.063470548367696e-17
ENSG00000140853	NLRC5	16	cg11617938	6	29692281	-14.854384931678132	1.2523419246063879e-48
ENSG00000140853	NLRC5	16	cg12537337	6	26442290	-8.712392105502657	4.282285620098085e-18
ENSG00000140853	NLRC5	16	cg12588917	6	29692082	-8.8507542642531	1.2805724525814623e-18
ENSG00000140853	NLRC5	16	cg13007871	6	30458519	-9.246603634949295	3.670834258797395e-20
ENSG00000140853	NLRC5	16	cg13031097	6	31322577	-10.061100990895126	1.5578374975670012e-23
ENSG00000140853	NLRC5	16	cg13036546	6	30460576	-6.8112919730858135	1.1113857638787455e-11
ENSG00000140853	NLRC5	16	cg13040666	6	29693534	-9.171418595064486	7.288288107784112e-20
ENSG00000140853	NLRC5	16	cg14140375	6	29692582	-16.077792539962577	2.0486216624317534e-56
ENSG00000140853	NLRC5	16	cg15331332	6	29692111	-11.09803369679564	3.2897510046607592e-28
ENSG00000140853	NLRC5	16	cg15584790	6	29692475	-9.143372086012064	9.400570738140925e-20
ENSG00000140853	NLRC5	16	cg16186435	6	32810833	-9.270836812679402	2.939510752768378e-20
ENSG00000140853	NLRC5	16	cg16890093	6	32813084	-8.312291683576277	1.27070482555728e-16
ENSG00000140853	NLRC5	16	cg17608381	6	29911550	-9.50533795805185	3.329328965347139e-21
ENSG00000140853	NLRC5	16	cg21108826	6	31235956	-7.501091436629163	7.749524068055366e-14
ENSG00000140853	NLRC5	16	cg21366673	6	30459512	-8.262305449919884	1.9205497599349394e-16
ENSG00000140853	NLRC5	16	cg21684411	6	31431573	-20.09782232534631	1.1231921017702491e-85
ENSG00000140853	NLRC5	16	cg23232773	6	31431902	-17.00533779358435	1.1257793301802344e-62
ENSG00000140853	NLRC5	16	cg23235965	6	30459540	-7.902421571405797	3.5065443863567583e-15
ENSG00000140853	NLRC5	16	cg23892836	6	29692085	-9.674379449930202	6.711077098663107e-22
ENSG00000140853	NLRC5	16	cg23923934	6	31322914	-11.358887592968372	1.8805336289665003e-29
ENSG00000140853	NLRC5	16	cg24351901	6	29692092	-8.088509733071167	7.9286088136888535e-16
ENSG00000140853	NLRC5	16	cg25843003	6	31431312	-16.57428326770543	9.963252675368215e-60
ENSG00000140853	NLRC5	16	cg27486585	6	30459595	-8.534610791750826	1.9675655075031546e-17
ENSG00000140853	NLRC5	16	cg27529346	6	31322926	-9.477000060051553	4.343485196945307e-21
ENSG00000141101	NOB1	16	cg00597087	19	3557418	-9.725999279630393	4.0863111651253507e-22
ENSG00000090857	PDPR	16	cg00597087	19	3557418	6.842119362418781	8.983461252645059e-12
ENSG00000008710	PKD1	16	cg01353464	3	38180116	10.055528562028337	1.6530191993909183e-23
ENSG00000008710	PKD1	16	cg05456948	10	135171583	10.97081756856951	1.3065304415834151e-27
ENSG00000008710	PKD1	16	cg09818588	4	84406319	9.752788420052395	3.175805055399411e-22
ENSG00000008710	PKD1	16	cg13136716	2	42275153	9.32254581284816	1.831983475674071e-20
ENSG00000008710	PKD1	16	cg14409810	9	140172908	7.294596199167961	3.5961536848136556e-13
ENSG00000008710	PKD1	16	cg15256305	17	36734942	11.3811007185804	1.4794428470843184e-29
ENSG00000008710	PKD1	16	cg22475576	19	1252813	15.755973614053058	2.643373117818701e-54
ENSG00000008710	PKD1	16	cg23193446	10	15210836	7.190967627842949	7.646815826972062e-13
ENSG00000008710	PKD1	16	cg27159792	10	69524182	7.066788270255775	1.8633645645846354e-12
ENSG00000132600	PRMT7	16	cg04657470	2	198365150	-10.053862394328883	1.6731097524995488e-23
ENSG00000168411	RFWD3	16	cg01717063	16	57570057	-15.059663356540854	6.662790974561564e-50
ENSG00000158717	RNF166	16	cg08118649	12	99038419	-15.235512752901743	5.36072350386478e-51
ENSG00000261218	RP11-960L18.1	16	cg10705386	10	69644512	6.808649012914	1.1309811991377156e-11
ENSG00000140988	RPS2	16	cg05807023	4	135874116	11.165543663175427	1.5849464074873948e-28
ENSG00000140988	RPS2	16	cg08548044	11	17249958	9.594218615524648	1.4426002611230881e-21
ENSG00000198106	SNX29P2	16	cg01624645	16	88058253	33.05795192827372	4.1594746992145175e-212
ENSG00000198106	SNX29P2	16	cg02201215	14	105714846	16.94800885953099	2.819789439154966e-62
ENSG00000198106	SNX29P2	16	cg02652978	16	81944263	-10.662617433821422	3.4095925194850753e-26
ENSG00000198106	SNX29P2	16	cg03969070	1	36851558	13.636886904938835	2.0088852819553817e-41
ENSG00000198106	SNX29P2	16	cg04242021	8	121137288	-7.514321920854679	7.016753354031328e-14
ENSG00000198106	SNX29P2	16	cg06380352	16	88057687	-14.829787155121426	1.7804856726156397e-48
ENSG00000198106	SNX29P2	16	cg07370464	17	43394456	8.357608906241317	8.724491687275905e-17
ENSG00000198106	SNX29P2	16	cg08519233	3	105085521	6.801270444680939	1.1908189206280953e-11
ENSG00000198106	SNX29P2	16	cg08542520	16	88044764	9.872854882580762	9.905774232473446e-23
ENSG00000198106	SNX29P2	16	cg09292409	16	15461083	-9.286893366414493	2.5381218384862253e-20
ENSG00000198106	SNX29P2	16	cg09518670	16	88150515	-7.095955976258582	1.5123637197055687e-12
ENSG00000198106	SNX29P2	16	cg11143796	4	178363279	8.400797615353982	6.083359305573884e-17
ENSG00000198106	SNX29P2	16	cg13921324	7	99769118	8.38115031034227	7.169287686113365e-17
ENSG00000198106	SNX29P2	16	cg16383001	1	100435543	8.042519435343399	1.1488339822271613e-15
ENSG00000198106	SNX29P2	16	cg16510040	1	40042432	9.87458378301137	9.740432357758003e-23
ENSG00000198106	SNX29P2	16	cg17334114	3	133646504	-16.32821605488626	4.508110178264565e-58
ENSG00000198106	SNX29P2	16	cg25100848	1	27320937	7.838326481966488	5.8097683274530956e-15
ENSG00000198106	SNX29P2	16	cg26612794	16	88148745	-8.635328557913812	8.328069556363337e-18
ENSG00000198106	SNX29P2	16	cg26635836	16	88237832	8.744450407783217	3.2443661103674018e-18
ENSG00000005513	SOX8	16	cg03195269	13	50510427	14.253424787649529	5.371244889650036e-45
ENSG00000005513	SOX8	16	cg04116494	14	76618702	-8.420763423767392	5.155673835357191e-17
ENSG00000005513	SOX8	16	cg04118234	7	138790441	-10.174175074361427	5.07554477680324e-24
ENSG00000005513	SOX8	16	cg07968857	19	52599226	-8.763726418050107	2.7493617807399496e-18
ENSG00000158792	SPATA2L	16	cg03920392	8	28243022	11.33762503621356	2.379465076624678e-29
ENSG00000158792	SPATA2L	16	cg03958163	10	105615502	14.637201977131049	2.6468289455688416e-47
ENSG00000158792	SPATA2L	16	cg13698153	12	118541722	21.150006666028393	3.2324267770708397e-94
ENSG00000158792	SPATA2L	16	cg20159777	1	203296550	9.348285034636069	1.4396673353932605e-20
ENSG00000158792	SPATA2L	16	cg24644049	4	85504048	9.222911541898577	4.558509285889716e-20
ENSG00000197471	SPN	16	cg01722963	16	88263261	-7.061591463367609	1.9317451432466876e-12
ENSG00000197471	SPN	16	cg08542520	16	88044764	7.158255699721117	9.673238393304117e-13
ENSG00000090447	TFAP4	16	cg24044351	5	108084818	-6.8012030444939455	1.191206668289836e-11
ENSG00000184517	ZFP1	16	cg00004105	10	100022608	26.45922852668286	2.2479559824333227e-142
ENSG00000184517	ZFP1	16	cg03588812	22	19777109	7.023131088641661	2.535485751059236e-12
ENSG00000184517	ZFP1	16	cg05033389	1	15170397	7.671540235229264	2.1180592969537466e-14
ENSG00000184517	ZFP1	16	cg06786860	1	220876396	8.77938166159757	2.3885355405944255e-18
ENSG00000184517	ZFP1	16	cg08484560	13	113413587	12.486323747795646	3.9356146149275425e-35
ENSG00000184517	ZFP1	16	cg09427273	10	11077625	10.287746872423746	1.6059836743939357e-24
ENSG00000184517	ZFP1	16	cg09959150	8	709624	11.471407707421966	5.345773140164799e-30
ENSG00000184517	ZFP1	16	cg10144597	1	6191821	9.099187205932452	1.3991302405842887e-19
ENSG00000184517	ZFP1	16	cg11124260	10	79709078	7.488606979033089	8.504997309565826e-14
ENSG00000184517	ZFP1	16	cg11220732	21	46065587	9.129819940318528	1.0608567122806434e-19
ENSG00000184517	ZFP1	16	cg15144631	7	2607139	8.961818927979932	4.788817151733193e-19
ENSG00000184517	ZFP1	16	cg16069756	7	5359162	9.981344881662286	3.4145745466467e-23
ENSG00000184517	ZFP1	16	cg16694365	7	114300	10.922840058809202	2.164286735881808e-27
ENSG00000184517	ZFP1	16	cg22313078	8	99171384	8.36952071606718	7.886076256744745e-17
ENSG00000184517	ZFP1	16	cg23562160	8	709692	11.949958808079005	2.2774313254067224e-32
ENSG00000184517	ZFP1	16	cg25930786	19	54584636	11.114862604050233	2.7294852890164734e-28
ENSG00000184517	ZFP1	16	cg25937451	21	46001680	12.924560224468037	1.8025567618682565e-37
ENSG00000184517	ZFP1	16	cg26420795	21	47451611	18.56871194272599	6.4871116817073e-74
ENSG00000184939	ZFP90	16	cg00338702	12	133463694	20.744569600339933	6.926848468931979e-91
ENSG00000184939	ZFP90	16	cg00811166	5	1288569	7.137358300776525	1.1239435635399504e-12
ENSG00000184939	ZFP90	16	cg00969119	3	13325360	12.68900856014207	3.348214145801115e-36
ENSG00000184939	ZFP90	16	cg01247788	10	126281564	7.407536389182716	1.560129514755329e-13
ENSG00000184939	ZFP90	16	cg01797488	17	66194621	9.441124480604538	6.07390854209985e-21
ENSG00000184939	ZFP90	16	cg02175183	6	150309507	8.911673715985325	7.482253222187464e-19
ENSG00000184939	ZFP90	16	cg02333875	6	29618205	7.978616157119886	1.914933924959823e-15
ENSG00000184939	ZFP90	16	cg02995493	1	66311218	6.928327569423953	4.939575442621158e-12
ENSG00000184939	ZFP90	16	cg04522432	6	29618347	8.126562282593001	5.825940770266261e-16
ENSG00000184939	ZFP90	16	cg04657470	2	198365150	32.66705335041647	9.370076250575546e-208
ENSG00000184939	ZFP90	16	cg05247809	17	66194706	9.897497216691043	7.781605366818424e-23
ENSG00000184939	ZFP90	16	cg05898591	5	174805715	7.936700265871731	2.6726814659530777e-15
ENSG00000184939	ZFP90	16	cg08837884	19	4540782	19.739638930106292	7.501537539193925e-83
ENSG00000184939	ZFP90	16	cg10860553	5	1399854	10.581036848690134	7.965991143076244e-26
ENSG00000184939	ZFP90	16	cg11697861	19	15533609	9.263637910967486	3.139531257160293e-20
ENSG00000184939	ZFP90	16	cg12241733	19	743394	7.878387935607948	4.238263662786318e-15
ENSG00000184939	ZFP90	16	cg13434396	19	1508555	9.770328034650767	2.671602192696141e-22
ENSG00000184939	ZFP90	16	cg14303526	10	101609768	9.389727270900664	9.803001500093195e-21
ENSG00000184939	ZFP90	16	cg14573411	9	126135992	7.4952541913846975	8.096543586634463e-14
ENSG00000184939	ZFP90	16	cg15922174	9	126135998	8.628125930183035	8.853149445572513e-18
ENSG00000184939	ZFP90	16	cg17387870	12	133463607	20.856876310678512	8.36903587081447e-92
ENSG00000184939	ZFP90	16	cg17861836	17	79202505	8.65054177619743	7.302166885806337e-18
ENSG00000184939	ZFP90	16	cg18912107	6	134288301	11.190256810947924	1.203906406006763e-28
ENSG00000184939	ZFP90	16	cg20645729	17	66194433	11.488856464678413	4.4141986971246634e-30
ENSG00000184939	ZFP90	16	cg20689647	17	66194695	8.254313041205291	2.0509253051578956e-16
ENSG00000184939	ZFP90	16	cg20760116	3	13324924	7.461122760988422	1.0459596591013666e-13
ENSG00000184939	ZFP90	16	cg21794419	3	182973032	24.479295168652833	1.858100571997227e-123
ENSG00000184939	ZFP90	16	cg22994198	19	1508528	13.355509660638985	7.714968363123044e-40
ENSG00000184939	ZFP90	16	cg24261529	17	66194137	11.160561306227306	1.6652013348372183e-28
ENSG00000184939	ZFP90	16	cg25018951	4	25235369	13.383198531397435	5.4022328360678715e-40
ENSG00000184939	ZFP90	16	cg25625514	11	76535564	8.661608282948798	6.638674219553332e-18
ENSG00000184939	ZFP90	16	cg25691026	19	8670586	8.646529274517512	7.558569356093802e-18
ENSG00000184939	ZFP90	16	cg25771195	16	58163814	22.542323122281605	4.782272453160271e-106
ENSG00000184939	ZFP90	16	cg27403989	7	87501783	13.460196346693689	1.9984302029022987e-40
ENSG00000162078	ZG16B	16	cg23445878	12	127545350	7.861561419304257	4.844346625075764e-15
ENSG00000122386	ZNF205	16	cg02942825	19	46185348	11.479532476151512	4.916969394800186e-30
ENSG00000122386	ZNF205	16	cg09678939	6	149806081	7.713564644333356	1.5345774905619554e-14
ENSG00000122386	ZNF205	16	cg13963033	5	126220247	7.986361309323636	1.8016989930853177e-15
ENSG00000122386	ZNF205	16	cg15132169	6	149805995	7.148578058661404	1.0374374828722757e-12
ENSG00000122386	ZNF205	16	cg18951352	6	149806077	7.327893024224394	2.8140313419729136e-13
ENSG00000158805	ZNF276	16	cg03085549	16	75150819	-8.148024784557629	4.893562828465989e-16
ENSG00000158805	ZNF276	16	cg03743982	16	75150833	-7.474371603987255	9.470645418197541e-14
ENSG00000158805	ZNF276	16	cg03991512	16	75150456	-8.367214161604709	8.047824949650727e-17
ENSG00000158805	ZNF276	16	cg07320140	16	75150611	-8.5869549711798	1.2593958837980753e-17
ENSG00000158805	ZNF276	16	cg09899215	16	75150799	-6.925986505529865	5.020799059139523e-12
ENSG00000158805	ZNF276	16	cg16540789	16	75150784	-7.704011900767036	1.6507340633809862e-14
ENSG00000158805	ZNF276	16	cg21302420	1	112162376	-10.907218667847317	2.5652723981842756e-27
ENSG00000158805	ZNF276	16	cg24429836	16	75150744	-8.471792438870295	3.347839101387426e-17
ENSG00000158805	ZNF276	16	cg24644049	4	85504048	-15.492068837085048	1.2755952341906382e-52
ENSG00000229809	ZNF688	16	cg01621268	7	75272341	10.946957609027345	1.6838327872674992e-27
ENSG00000197302	ZNF720	16	cg03944143	17	2595123	-100.05741338030813	0
ENSG00000162086	ZNF75A	16	cg06952873	6	28059208	6.908028777214878	5.692406481337197e-12
ENSG00000162086	ZNF75A	16	cg06994692	7	5111621	8.181513002033492	3.7272791981650797e-16
ENSG00000162086	ZNF75A	16	cg09156207	6	28058724	8.079673337917013	8.518260578736187e-16
ENSG00000162086	ZNF75A	16	cg12442452	17	34842733	-8.87138733200028	1.06858858894775e-18
ENSG00000162086	ZNF75A	16	cg13425960	19	50550359	9.553606554522153	2.11469375873201e-21
ENSG00000162086	ZNF75A	16	cg15146567	3	42948626	6.9789984136644705	3.464281083092522e-12
ENSG00000162086	ZNF75A	16	cg17944885	19	12225735	8.873898595933396	1.0452081888267681e-18
ENSG00000162086	ZNF75A	16	cg21634218	19	50553699	9.302224058148113	2.2041987633618416e-20
ENSG00000162086	ZNF75A	16	cg25533993	19	50550284	8.859737078977592	1.1839935798499192e-18
ENSG00000162086	ZNF75A	16	cg26257814	19	50553708	9.700949526239645	5.209274943124711e-22
ENSG00000140987	ZSCAN32	16	cg17171325	3	10052813	-8.912748309452695	7.418740491559769e-19
ENSG00000181409	AATK	17	cg03987003	1	145516092	-8.470459761791513	3.388410879012478e-17
ENSG00000181409	AATK	17	cg23483530	5	176759977	15.285361435760878	2.624810539812562e-51
ENSG00000159842	ABR	17	cg14428252	14	60043289	-6.812445700503899	1.1024179676806402e-11
ENSG00000198150	AC135178.1	17	cg18888697	5	117543966	-12.263733469435836	5.735447401523646e-34
ENSG00000161905	ALOX15	17	cg02720013	3	178981100	7.984340658261474	1.831455659228411e-15
ENSG00000161905	ALOX15	17	cg25404033	7	108297992	14.600073338884103	4.489525559617995e-47
ENSG00000006125	AP2B1	17	cg19694781	19	47549865	57.70873937051622	0
ENSG00000214087	ARL16	17	cg10519680	8	37707506	13.122512124240968	1.5157444628055563e-38
ENSG00000168646	AXIN2	17	cg21245092	14	74813995	9.116821629060597	1.1922997741055874e-19
ENSG00000175711	B3GNTL1	17	cg00868383	19	58951814	-10.443554601764182	3.2887604177637754e-25
ENSG00000175711	B3GNTL1	17	cg00972288	10	69644348	-10.692203250378288	2.4942920828058536e-26
ENSG00000175711	B3GNTL1	17	cg04287931	4	79697739	-19.05425316617482	1.45459880002517e-77
ENSG00000175711	B3GNTL1	17	cg04441191	3	48130393	-8.286210409519596	1.575836100401471e-16
ENSG00000175711	B3GNTL1	17	cg06702733	4	57397016	-6.806143138665504	1.1510886720333268e-11
ENSG00000175711	B3GNTL1	17	cg07228441	8	681215	-9.991560271258711	3.092233401068154e-23
ENSG00000175711	B3GNTL1	17	cg09195081	22	24951395	-8.972790097710963	4.34731075096877e-19
ENSG00000175711	B3GNTL1	17	cg11010178	6	127837030	-21.903443385619244	1.4879945273710194e-100
ENSG00000175711	B3GNTL1	17	cg11204780	5	162932808	-7.278603150903132	4.0367372850335805e-13
ENSG00000175711	B3GNTL1	17	cg13839457	11	115630889	-10.470838555544482	2.484978191051658e-25
ENSG00000175711	B3GNTL1	17	cg18436758	1	21113190	-10.177808288289317	4.864394199354864e-24
ENSG00000175711	B3GNTL1	17	cg23609082	1	151585362	-8.8782743273285	1.0043128255656445e-18
ENSG00000175711	B3GNTL1	17	cg25951811	14	96858416	-6.896365084829338	6.1705746338306445e-12
ENSG00000175866	BAIAP2	17	cg09840623	2	42396402	-18.149079806901288	8.414177651409156e-71
ENSG00000175866	BAIAP2	17	cg23483530	5	176759977	-14.746509239768475	5.762058865883324e-48
ENSG00000005379	BZRAP1	17	cg20585830	22	21998385	9.738294663255896	3.630566636668574e-22
ENSG00000258315	C17orf49	17	cg13474750	22	38037408	-9.765174435605319	2.81278809948415e-22
ENSG00000212719	C17orf51	17	cg07654559	2	74710618	-17.428442776914224	1.2068155418039384e-65
ENSG00000212719	C17orf51	17	cg09468937	19	36758564	-12.459615794937418	5.419356398641838e-35
ENSG00000212719	C17orf51	17	cg18031861	13	63617080	13.311677955253415	1.3399918728577148e-39
ENSG00000261589	CTC-462L7.1	17	cg00891995	1	153113262	-7.099777626533317	1.4697415483131873e-12
[truncated: 561 more rows]
