# Supplementary material for: Genome-wide identification of genes regulating DNA methylation using genetic anchors for causal inference
Source: Genome Biol. 2020 Aug 28;21:220. doi: 10.1186/s13059-020-02114-z (PMC7453518; doi:10.1186/s13059-020-02114-z)
Supplement: Supplementary file 6 — Additional file 6: Table S5. The 818 identified genes, their classification (TF/EpiFactor/Other), and for each gene the number of positive/negative associations, the number of regions affected (consisting of consecutive probes within <1Kb) and the number of regions of various sizes affected. [file 13059_2020_2114_MOESM6_ESM.csv]

Ensembl_ID	HGNC_ID	Classification	N_targets	N_Up	N_Down	N_regions	N_regions_1CpG	N_regions_2CpGs	N_regions_3CpGs	N_regions_4CpGs	N_regions_5CpGs_or_more
ENSG00000138468	SENP7	Other	208	19	189	98	65	10	7	8	8
ENSG00000109320	NFKB1	TF	142	3	139	127	117	6	3	1	0
ENSG00000144354	CDCA7	Other	79	79	0	79	79	0	0	0	0
ENSG00000146232	NFKBIE	Other	76	76	0	70	64	6	0	0	0
ENSG00000177311	ZBTB38	TF	49	49	0	34	23	8	2	1	0
ENSG00000164649	CDCA7L	Other	47	47	0	47	47	0	0	0	0
ENSG00000140853	NLRC5	Other	43	0	43	11	5	1	0	2	3
ENSG00000166261	ZNF202	TF	37	0	37	19	11	2	3	2	1
ENSG00000184939	ZFP90	TF	34	34	0	25	19	5	0	0	1
ENSG00000172262	ZNF131	TF	29	1	28	17	13	1	1	0	2
ENSG00000198131	ZNF544	TF	28	15	13	13	7	2	1	1	2
ENSG00000102554	KLF5	TF	27	27	0	16	11	4	0	0	1
ENSG00000160961	ZNF333	TF	27	26	1	16	11	3	0	0	2
ENSG00000174652	ZNF266	TF	26	5	21	21	18	2	0	1	0
ENSG00000113916	BCL6	TF	25	24	1	22	19	3	0	0	0
ENSG00000198106	SNX29P2	Other	19	12	7	18	17	1	0	0	0
ENSG00000184517	ZFP1	TF	18	18	0	17	16	1	0	0	0
ENSG00000185811	IKZF1	TF/EpiFactor	17	17	0	9	7	0	0	1	1
ENSG00000198521	ZNF43	TF	17	11	6	8	4	0	3	1	0
ENSG00000104714	ERICH1	Other	16	6	10	16	16	0	0	0	0
ENSG00000181666	HKR1	TF	16	1	15	8	4	1	2	1	0
ENSG00000178409	BEND3	Other	15	15	0	13	12	0	1	0	0
ENSG00000074800	ENO1	Other	14	9	5	9	7	0	1	1	0
ENSG00000234284	ZNF879	TF	14	13	1	13	12	1	0	0	0
ENSG00000261589	CTC-462L7.1	Other	14	7	7	10	7	2	1	0	0
ENSG00000175711	B3GNTL1	Other	13	0	13	13	13	0	0	0	0
ENSG00000198105	ZNF248	TF	13	11	2	7	4	2	0	0	1
ENSG00000135503	ACVR1B	Other	12	0	12	5	3	1	0	0	1
ENSG00000182986	ZNF320	TF	12	8	4	8	5	2	1	0	0
ENSG00000186130	ZBTB6	TF	12	12	0	6	3	2	0	0	1
ENSG00000196867	ZFP28	TF	12	1	11	6	4	1	0	0	1
ENSG00000214548	MEG3	Other	12	11	1	5	2	1	1	0	1
ENSG00000204947	ZNF425	TF	11	11	0	6	4	1	0	0	1
ENSG00000250312	ZNF718	TF	11	11	0	8	6	1	1	0	0
ENSG00000148110	HIATL1	Other	10	0	10	7	6	0	0	1	0
ENSG00000162086	ZNF75A	TF	10	9	1	7	4	3	0	0	0
ENSG00000197020	ZNF100	TF	10	9	1	5	3	1	0	0	1
ENSG00000008710	PKD1	Other	9	9	0	9	9	0	0	0	0
ENSG00000060069	CTDP1	Other	9	2	7	8	7	1	0	0	0
ENSG00000158805	ZNF276	TF	9	0	9	3	2	0	0	0	1
ENSG00000260910	LINC00565	Other	9	4	5	9	9	0	0	0	0
ENSG00000269996	RP11-343N15.5	Other	9	2	7	7	6	0	1	0	0
ENSG00000099821	POLRMT	Other	8	7	1	8	8	0	0	0	0
ENSG00000109381	ELF2	TF	8	7	1	4	1	2	1	0	0
ENSG00000114770	ABCC5	Other	8	7	1	2	1	0	0	0	1
ENSG00000176845	METRNL	Other	8	3	5	7	6	1	0	0	0
ENSG00000185187	SIGIRR	Other	8	7	1	8	8	0	0	0	0
ENSG00000215421	ZNF407	TF	8	8	0	7	6	1	0	0	0
ENSG00000242086	LINC00969	Other	8	5	3	8	8	0	0	0	0
ENSG00000243708	PLA2G4B	Other	8	8	0	7	6	1	0	0	0
ENSG00000104043	ATP8B4	Other	7	0	7	7	7	0	0	0	0
ENSG00000104731	KLHDC4	Other	7	5	2	7	7	0	0	0	0
ENSG00000117139	KDM5B	TF/EpiFactor	7	7	0	5	3	2	0	0	0
ENSG00000127804	METTL16	Other	7	1	6	7	7	0	0	0	0
ENSG00000149531	FRG1B	Other	7	1	6	7	7	0	0	0	0
ENSG00000160539	PPAPDC3	Other	7	7	0	7	7	0	0	0	0
ENSG00000167637	ZNF283	TF	7	0	7	3	2	0	0	0	1
ENSG00000183087	GAS6	Other	7	6	1	7	7	0	0	0	0
ENSG00000188785	ZNF548	TF	7	0	7	3	1	0	2	0	0
ENSG00000013573	DDX11	Other	6	4	2	4	3	0	1	0	0
ENSG00000109536	FRG1	Other	6	3	3	6	6	0	0	0	0
ENSG00000122033	MTIF3	Other	6	5	1	2	0	0	2	0	0
ENSG00000126870	WDR60	Other	6	2	4	6	6	0	0	0	0
ENSG00000150401	DCUN1D2	Other	6	3	3	6	6	0	0	0	0
ENSG00000164849	GPR146	Other	6	2	4	6	6	0	0	0	0
ENSG00000175691	ZNF77	TF	6	0	6	5	4	1	0	0	0
ENSG00000188227	ZNF793	TF	6	4	2	2	0	1	0	1	0
ENSG00000189298	ZKSCAN3	TF	6	2	4	5	4	1	0	0	0
ENSG00000197566	ZNF624	TF	6	6	0	4	2	2	0	0	0
ENSG00000035115	SH3YL1	Other	5	1	4	5	5	0	0	0	0
ENSG00000062598	ELMO2	Other	5	5	0	2	1	0	0	1	0
ENSG00000101193	GID8	Other	5	5	0	5	5	0	0	0	0
ENSG00000105717	PBX4	TF	5	4	1	5	5	0	0	0	0
ENSG00000119772	DNMT3A	EpiFactor	5	5	0	5	5	0	0	0	0
ENSG00000120458	MSANTD2	Other	5	5	0	2	0	1	1	0	0
ENSG00000122386	ZNF205	TF	5	5	0	3	2	0	1	0	0
ENSG00000122687	FTSJ2	Other	5	3	2	5	5	0	0	0	0
ENSG00000127419	TMEM175	Other	5	0	5	5	5	0	0	0	0
ENSG00000134265	NAPG	Other	5	5	0	5	5	0	0	0	0
ENSG00000145217	SLC26A1	Other	5	4	1	5	5	0	0	0	0
ENSG00000157551	KCNJ15	Other	5	5	0	5	5	0	0	0	0
ENSG00000158792	SPATA2L	Other	5	5	0	5	5	0	0	0	0
ENSG00000167384	ZNF180	TF	5	1	4	4	3	1	0	0	0
ENSG00000169925	BRD3	EpiFactor	5	5	0	5	5	0	0	0	0
ENSG00000171045	TSNARE1	Other	5	4	1	4	3	1	0	0	0
ENSG00000198429	ZNF69	TF	5	5	0	2	1	0	0	1	0
ENSG00000005513	SOX8	TF	4	1	3	4	4	0	0	0	0
ENSG00000083828	ZNF586	TF	4	0	4	2	0	2	0	0	0
ENSG00000086062	B4GALT1	Other	4	2	2	3	2	1	0	0	0
ENSG00000090612	ZNF268	TF	4	3	1	4	4	0	0	0	0
ENSG00000100321	SYNGR1	Other	4	1	3	4	4	0	0	0	0
ENSG00000103313	MEFV	Other	4	4	0	3	2	1	0	0	0
ENSG00000107341	UBE2R2	Other	4	4	0	2	1	0	1	0	0
ENSG00000124789	NUP153	Other	4	2	2	4	4	0	0	0	0
ENSG00000130844	ZNF331	TF	4	2	2	4	4	0	0	0	0
ENSG00000131196	NFATC1	TF	4	2	2	4	4	0	0	0	0
ENSG00000141013	GAS8	Other	4	1	3	4	4	0	0	0	0
ENSG00000160094	ZNF362	TF	4	4	0	2	1	0	1	0	0
ENSG00000160208	RRP1B	Other	4	2	2	4	4	0	0	0	0
ENSG00000162542	TMCO4	Other	4	4	0	4	4	0	0	0	0
ENSG00000163803	PLB1	Other	4	0	4	4	4	0	0	0	0
ENSG00000164776	PHKG1	Other	4	1	3	4	4	0	0	0	0
ENSG00000165716	FAM69B	Other	4	0	4	4	4	0	0	0	0
ENSG00000167658	EEF2	Other	4	4	0	3	2	1	0	0	0
ENSG00000167785	ZNF558	TF	4	0	4	2	1	0	1	0	0
ENSG00000167968	DNASE1L2	Other	4	0	4	4	4	0	0	0	0
ENSG00000171421	MRPL36	Other	4	4	0	4	4	0	0	0	0
ENSG00000172171	TEFM	Other	4	0	4	3	2	1	0	0	0
ENSG00000178381	ZFAND2A	Other	4	4	0	4	4	0	0	0	0
ENSG00000181031	RPH3AL	Other	4	0	4	4	4	0	0	0	0
ENSG00000181220	ZNF746	TF	4	4	0	3	2	1	0	0	0
ENSG00000182141	ZNF708	TF	4	0	4	2	1	0	1	0	0
ENSG00000186480	INSIG1	Other	4	4	0	4	4	0	0	0	0
ENSG00000188171	ZNF626	TF	4	3	1	3	2	1	0	0	0
ENSG00000197857	ZNF44	TF	4	0	4	3	2	1	0	0	0
ENSG00000204104	TRAF3IP1	Other	4	0	4	4	4	0	0	0	0
ENSG00000225190	PLEKHM1	Other	4	2	2	4	4	0	0	0	0
ENSG00000099822	HCN2	Other	3	2	1	3	3	0	0	0	0
ENSG00000104549	SQLE	Other	3	0	3	3	3	0	0	0	0
ENSG00000105136	ZNF419	TF	3	0	3	3	3	0	0	0	0
ENSG00000106603	COA1	Other	3	0	3	3	3	0	0	0	0
ENSG00000109046	WSB1	Other	3	1	2	3	3	0	0	0	0
ENSG00000112182	BACH2	TF	3	3	0	3	3	0	0	0	0
ENSG00000120645	IQSEC3	Other	3	1	2	3	3	0	0	0	0
ENSG00000124102	PI3	Other	3	3	0	3	3	0	0	0	0
ENSG00000124243	BCAS4	Other	3	3	0	3	3	0	0	0	0
ENSG00000125618	PAX8	TF	3	0	3	3	3	0	0	0	0
ENSG00000127415	IDUA	Other	3	0	3	3	3	0	0	0	0
ENSG00000128829	EIF2AK4	Other	3	2	1	3	3	0	0	0	0
ENSG00000128891	C15orf57	Other	3	1	2	3	3	0	0	0	0
ENSG00000133794	ARNTL	TF/EpiFactor	3	0	3	2	1	1	0	0	0
ENSG00000141510	TP53	TF/EpiFactor	3	2	1	2	1	1	0	0	0
ENSG00000145725	PPIP5K2	Other	3	3	0	1	0	0	1	0	0
ENSG00000146918	NCAPG2	Other	3	0	3	3	3	0	0	0	0
ENSG00000147813	NAPRT1	Other	3	0	3	3	3	0	0	0	0
ENSG00000151353	TMEM18	Other	3	2	1	3	3	0	0	0	0
ENSG00000152219	ARL14EP	Other	3	0	3	3	3	0	0	0	0
ENSG00000156265	MAP3K7CL	Other	3	0	3	3	3	0	0	0	0
ENSG00000160712	IL6R	Other	3	2	1	3	3	0	0	0	0
ENSG00000162711	NLRP3	Other	3	0	3	2	1	1	0	0	0
ENSG00000166347	CYB5A	Other	3	3	0	3	3	0	0	0	0
ENSG00000167083	GNGT2	Other	3	1	2	3	3	0	0	0	0
ENSG00000168255	POLR2J3	Other	3	3	0	2	1	1	0	0	0
ENSG00000169762	TAPT1	Other	3	2	1	3	3	0	0	0	0
ENSG00000171298	GAA	Other	3	1	2	3	3	0	0	0	0
ENSG00000171817	ZNF540	TF	3	3	0	1	0	0	1	0	0
ENSG00000172116	CD8B	Other	3	3	0	3	3	0	0	0	0
ENSG00000172785	CBWD1	Other	3	2	1	2	1	1	0	0	0
ENSG00000173209	AHSA2	Other	3	0	3	2	1	1	0	0	0
ENSG00000173272	MZT2A	Other	3	1	2	3	3	0	0	0	0
ENSG00000175322	ZNF519	TF	3	1	2	3	3	0	0	0	0
ENSG00000176915	ANKLE2	Other	3	0	3	3	3	0	0	0	0
ENSG00000176945	MUC20	Other	3	0	3	3	3	0	0	0	0
ENSG00000177683	THAP5	TF	3	1	2	3	3	0	0	0	0
ENSG00000180509	KCNE1	Other	3	3	0	3	3	0	0	0	0
ENSG00000180855	ZNF443	TF	3	0	3	3	3	0	0	0	0
ENSG00000182903	ZNF721	TF	3	3	0	3	3	0	0	0	0
ENSG00000185442	FAM174B	Other	3	0	3	3	3	0	0	0	0
ENSG00000187147	RNF220	Other	3	0	3	2	1	1	0	0	0
ENSG00000197816	CCDC180	Other	3	1	2	2	1	1	0	0	0
ENSG00000198182	ZNF607	TF	3	3	0	3	3	0	0	0	0
ENSG00000198964	SGMS1	Other	3	3	0	2	1	1	0	0	0
ENSG00000212719	C17orf51	Other	3	1	2	3	3	0	0	0	0
ENSG00000215375	MYL5	Other	3	3	0	3	3	0	0	0	0
ENSG00000256087	ZNF432	TF	3	1	2	2	1	1	0	0	0
ENSG00000258701	LINC00638	Other	3	0	3	3	3	0	0	0	0
ENSG00000258839	MC1R	Other	3	3	0	3	3	0	0	0	0
ENSG00000262089	RP11-589P10.5	Other	3	3	0	3	3	0	0	0	0
ENSG00000269893	SNHG8	Other	3	3	0	3	3	0	0	0	0
ENSG00000006534	ALDH3B1	Other	2	0	2	2	2	0	0	0	0
ENSG00000018869	ZNF582	TF	2	2	0	1	0	1	0	0	0
ENSG00000032389	TSSC1	Other	2	1	1	2	2	0	0	0	0
ENSG00000036448	MYOM2	Other	2	0	2	2	2	0	0	0	0
ENSG00000053501	USE1	Other	2	1	1	2	2	0	0	0	0
ENSG00000061936	SFSWAP	Other	2	1	1	2	2	0	0	0	0
ENSG00000067208	EVI5	Other	2	1	1	2	2	0	0	0	0
ENSG00000067606	PRKCZ	Other	2	2	0	2	2	0	0	0	0
ENSG00000069424	KCNAB2	Other	2	0	2	2	2	0	0	0	0
ENSG00000070669	ASNS	Other	2	1	1	2	2	0	0	0	0
ENSG00000071127	WDR1	Other	2	0	2	2	2	0	0	0	0
ENSG00000072274	TFRC	Other	2	0	2	2	2	0	0	0	0
ENSG00000081665	ZNF506	TF	2	1	1	2	2	0	0	0	0
ENSG00000085491	SLC25A24	Other	2	1	1	2	2	0	0	0	0
ENSG00000088448	ANKRD10	Other	2	1	1	2	2	0	0	0	0
ENSG00000095303	PTGS1	Other	2	0	2	2	2	0	0	0	0
ENSG00000099860	GADD45B	EpiFactor	2	2	0	2	2	0	0	0	0
ENSG00000101307	SIRPB1	Other	2	1	1	2	2	0	0	0	0
ENSG00000102445	KIAA0226L	Other	2	1	1	2	2	0	0	0	0
ENSG00000103196	CRISPLD2	Other	2	1	1	2	2	0	0	0	0
ENSG00000103326	CAPN15	Other	2	1	1	2	2	0	0	0	0
ENSG00000104267	CA2	Other	2	2	0	2	2	0	0	0	0
ENSG00000105497	ZNF175	TF	2	2	0	1	0	1	0	0	0
ENSG00000105556	MIER2	Other	2	0	2	2	2	0	0	0	0
ENSG00000105583	WDR83OS	Other	2	0	2	2	2	0	0	0	0
ENSG00000106153	CHCHD2	Other	2	2	0	2	2	0	0	0	0
ENSG00000110172	CHORDC1	Other	2	0	2	2	2	0	0	0	0
ENSG00000110367	DDX6	Other	2	0	2	2	2	0	0	0	0
ENSG00000111897	SERINC1	Other	2	2	0	2	2	0	0	0	0
ENSG00000112584	FAM120B	Other	2	1	1	2	2	0	0	0	0
ENSG00000113504	SLC12A7	Other	2	0	2	2	2	0	0	0	0
ENSG00000114520	SNX4	Other	2	1	1	2	2	0	0	0	0
ENSG00000114544	SLC41A3	Other	2	1	1	2	2	0	0	0	0
ENSG00000115561	CHMP3	Other	2	0	2	2	2	0	0	0	0
ENSG00000116213	WRAP73	Other	2	0	2	2	2	0	0	0	0
ENSG00000117868	ESYT2	Other	2	0	2	2	2	0	0	0	0
ENSG00000120539	MASTL	EpiFactor	2	2	0	2	2	0	0	0	0
ENSG00000123552	USP45	Other	2	2	0	2	2	0	0	0	0
ENSG00000125818	PSMF1	Other	2	0	2	2	2	0	0	0	0
ENSG00000125912	NCLN	Other	2	2	0	2	2	0	0	0	0
ENSG00000127528	KLF2	TF	2	0	2	2	2	0	0	0	0
ENSG00000129993	CBFA2T3	Other	2	1	1	2	2	0	0	0	0
ENSG00000130684	ZNF337	TF	2	2	0	1	0	1	0	0	0
ENSG00000131165	CHMP1A	Other	2	2	0	2	2	0	0	0	0
ENSG00000131203	IDO1	Other	2	2	0	2	2	0	0	0	0
ENSG00000132128	LRRC41	Other	2	2	0	1	0	1	0	0	0
ENSG00000132394	EEFSEC	Other	2	2	0	2	2	0	0	0	0
ENSG00000134684	YARS	Other	2	2	0	2	2	0	0	0	0
ENSG00000135047	CTSL	Other	2	2	0	2	2	0	0	0	0
ENSG00000137038	TMEM261	Other	2	2	0	1	0	1	0	0	0
ENSG00000137265	IRF4	TF	2	1	1	2	2	0	0	0	0
ENSG00000138160	KIF11	Other	2	0	2	2	2	0	0	0	0
ENSG00000139405	RITA1	Other	2	0	2	2	2	0	0	0	0
ENSG00000140104	C14orf79	Other	2	2	0	2	2	0	0	0	0
ENSG00000140988	RPS2	Other	2	2	0	2	2	0	0	0	0
ENSG00000141564	RPTOR	Other	2	1	1	2	2	0	0	0	0
ENSG00000141574	SECTM1	Other	2	1	1	2	2	0	0	0	0
ENSG00000142347	MYO1F	Other	2	2	0	2	2	0	0	0	0
ENSG00000142669	SH3BGRL3	Other	2	2	0	2	2	0	0	0	0
ENSG00000142794	NBPF3	Other	2	0	2	2	2	0	0	0	0
ENSG00000143799	PARP1	EpiFactor	2	1	1	2	2	0	0	0	0
ENSG00000144134	RABL2A	Other	2	2	0	1	0	1	0	0	0
ENSG00000145388	METTL14	Other	2	1	1	2	2	0	0	0	0
ENSG00000146535	GNA12	Other	2	2	0	2	2	0	0	0	0
ENSG00000146540	C7orf50	Other	2	2	0	2	2	0	0	0	0
ENSG00000146574	CCZ1B	Other	2	1	1	2	2	0	0	0	0
ENSG00000148384	INPP5E	Other	2	0	2	2	2	0	0	0	0
ENSG00000149260	CAPN5	Other	2	0	2	2	2	0	0	0	0
ENSG00000149548	CCDC15	Other	2	0	2	2	2	0	0	0	0
ENSG00000150540	HNMT	Other	2	0	2	2	2	0	0	0	0
ENSG00000151240	DIP2C	Other	2	2	0	2	2	0	0	0	0
ENSG00000151503	NCAPD3	Other	2	0	2	2	2	0	0	0	0
ENSG00000151640	DPYSL4	Other	2	2	0	2	2	0	0	0	0
ENSG00000152439	ZNF773	TF	2	1	1	2	2	0	0	0	0
ENSG00000153162	BMP6	Other	2	1	1	2	2	0	0	0	0
ENSG00000153936	HS2ST1	Other	2	2	0	2	2	0	0	0	0
ENSG00000155093	PTPRN2	Other	2	0	2	2	2	0	0	0	0
ENSG00000155636	RBM45	Other	2	1	1	2	2	0	0	0	0
ENSG00000158457	TSPAN33	Other	2	1	1	1	0	1	0	0	0
ENSG00000158483	FAM86C1	Other	2	0	2	2	2	0	0	0	0
ENSG00000158669	AGPAT6	Other	2	1	1	2	2	0	0	0	0
ENSG00000160223	ICOSLG	Other	2	1	1	2	2	0	0	0	0
ENSG00000160294	MCM3AP	Other	2	1	1	2	2	0	0	0	0
ENSG00000161905	ALOX15	Other	2	2	0	2	2	0	0	0	0
ENSG00000162576	MXRA8	Other	2	2	0	2	2	0	0	0	0
ENSG00000164483	SAMD3	Other	2	2	0	1	0	1	0	0	0
ENSG00000164877	MICALL2	Other	2	2	0	2	2	0	0	0	0
ENSG00000165055	METTL2B	Other	2	2	0	2	2	0	0	0	0
ENSG00000165702	GFI1B	TF/EpiFactor	2	2	0	2	2	0	0	0	0
ENSG00000165752	STK32C	Other	2	1	1	2	2	0	0	0	0
ENSG00000166377	ATP9B	Other	2	0	2	2	2	0	0	0	0
ENSG00000166821	PEX11A	Other	2	0	2	2	2	0	0	0	0
ENSG00000167522	ANKRD11	Other	2	2	0	2	2	0	0	0	0
ENSG00000168159	RNF187	Other	2	1	1	2	2	0	0	0	0
ENSG00000168818	STX18	Other	2	1	1	2	2	0	0	0	0
ENSG00000169813	HNRNPF	Other	2	0	2	2	2	0	0	0	0
ENSG00000169981	ZNF35	TF	2	2	0	1	0	1	0	0	0
ENSG00000170667	RASA4B	Other	2	1	1	2	2	0	0	0	0
ENSG00000174695	TMEM167A	Other	2	1	1	2	2	0	0	0	0
ENSG00000175115	PACS1	Other	2	1	1	2	2	0	0	0	0
ENSG00000175265	GOLGA8A	Other	2	2	0	2	2	0	0	0	0
ENSG00000175866	BAIAP2	Other	2	0	2	2	2	0	0	0	0
ENSG00000176024	ZNF613	TF	2	2	0	2	2	0	0	0	0
ENSG00000176623	RMDN1	Other	2	0	2	2	2	0	0	0	0
ENSG00000177030	DEAF1	TF	2	2	0	1	0	1	0	0	0
ENSG00000177225	PDDC1	Other	2	1	1	2	2	0	0	0	0
ENSG00000177335	C8orf31	Other	2	2	0	2	2	0	0	0	0
ENSG00000178297	TMPRSS9	Other	2	2	0	2	2	0	0	0	0
ENSG00000180228	PRKRA	Other	2	2	0	1	0	1	0	0	0
ENSG00000180539	C9orf139	Other	2	2	0	2	2	0	0	0	0
ENSG00000180921	FAM83H	Other	2	1	1	2	2	0	0	0	0
ENSG00000181409	AATK	Other	2	1	1	2	2	0	0	0	0
ENSG00000182257	C22orf26	Other	2	2	0	2	2	0	0	0	0
ENSG00000182307	C8orf33	Other	2	0	2	2	2	0	0	0	0
ENSG00000182511	FES	Other	2	1	1	2	2	0	0	0	0
ENSG00000183570	PCBP3	Other	2	1	1	2	2	0	0	0	0
ENSG00000184182	UBE2F	Other	2	0	2	2	2	0	0	0	0
ENSG00000184381	PLA2G6	Other	2	0	2	2	2	0	0	0	0
ENSG00000184674	GSTT1	Other	2	1	1	2	2	0	0	0	0
ENSG00000185022	MAFF	TF	2	0	2	2	2	0	0	0	0
ENSG00000185112	FAM43A	Other	2	0	2	2	2	0	0	0	0
ENSG00000185619	PCGF3	EpiFactor	2	1	1	2	2	0	0	0	0
ENSG00000186448	ZNF197	TF	2	2	0	2	2	0	0	0	0
ENSG00000187796	CARD9	Other	2	0	2	2	2	0	0	0	0
ENSG00000188295	ZNF669	TF	2	2	0	2	2	0	0	0	0
ENSG00000196526	AFAP1	Other	2	0	2	2	2	0	0	0	0
ENSG00000196793	ZNF239	TF	2	2	0	2	2	0	0	0	0
ENSG00000196950	SLC39A10	Other	2	0	2	2	2	0	0	0	0
ENSG00000197471	SPN	Other	2	1	1	2	2	0	0	0	0
ENSG00000197937	ZNF347	TF	2	2	0	2	2	0	0	0	0
ENSG00000198721	ECI2	Other	2	2	0	2	2	0	0	0	0
ENSG00000205060	SLC35B4	Other	2	1	1	2	2	0	0	0	0
ENSG00000213020	ZNF611	TF	2	0	2	2	2	0	0	0	0
ENSG00000215271	HOMEZ	TF	2	2	0	2	2	0	0	0	0
ENSG00000215912	TTC34	Other	2	0	2	2	2	0	0	0	0
ENSG00000221926	TRIM16	EpiFactor	2	1	1	2	2	0	0	0	0
ENSG00000225978	HAR1A	Other	2	2	0	2	2	0	0	0	0
ENSG00000249471	ZNF324B	TF	2	0	2	2	2	0	0	0	0
ENSG00000251369	ZNF550	TF	2	2	0	2	2	0	0	0	0
ENSG00000000971	CFH	Other	1	0	1	1	1	0	0	0	0
ENSG00000003056	M6PR	Other	1	0	1	1	1	0	0	0	0
ENSG00000003249	DBNDD1	Other	1	1	0	1	1	0	0	0	0
ENSG00000004700	RECQL	Other	1	0	1	1	1	0	0	0	0
ENSG00000005379	BZRAP1	Other	1	1	0	1	1	0	0	0	0
ENSG00000005436	GCFC2	Other	1	1	0	1	1	0	0	0	0
ENSG00000006007	GDE1	Other	1	1	0	1	1	0	0	0	0
ENSG00000006125	AP2B1	Other	1	1	0	1	1	0	0	0	0
ENSG00000006715	VPS41	Other	1	1	0	1	1	0	0	0	0
ENSG00000006744	ELAC2	Other	1	0	1	1	1	0	0	0	0
ENSG00000008988	RPS20	Other	1	1	0	1	1	0	0	0	0
ENSG00000011590	ZBTB32	TF	1	0	1	1	1	0	0	0	0
ENSG00000015475	BID	Other	1	0	1	1	1	0	0	0	0
ENSG00000019102	VSIG2	Other	1	0	1	1	1	0	0	0	0
ENSG00000021762	OSBPL5	Other	1	1	0	1	1	0	0	0	0
ENSG00000033178	UBA6	Other	1	0	1	1	1	0	0	0	0
ENSG00000035664	DAPK2	Other	1	1	0	1	1	0	0	0	0
ENSG00000037757	MRI1	Other	1	0	1	1	1	0	0	0	0
ENSG00000039123	SKIV2L2	Other	1	0	1	1	1	0	0	0	0
ENSG00000040531	CTNS	Other	1	1	0	1	1	0	0	0	0
ENSG00000041357	PSMA4	Other	1	1	0	1	1	0	0	0	0
ENSG00000042317	SPATA7	Other	1	0	1	1	1	0	0	0	0
ENSG00000047578	KIAA0556	Other	1	0	1	1	1	0	0	0	0
ENSG00000048392	RRM2B	Other	1	0	1	1	1	0	0	0	0
ENSG00000048649	RSF1	EpiFactor	1	1	0	1	1	0	0	0	0
ENSG00000051009	FAM160A2	Other	1	0	1	1	1	0	0	0	0
ENSG00000054793	ATP9A	Other	1	1	0	1	1	0	0	0	0
ENSG00000055483	USP36	EpiFactor	1	1	0	1	1	0	0	0	0
ENSG00000059122	FLYWCH1	TF	1	0	1	1	1	0	0	0	0
ENSG00000060237	WNK1	Other	1	1	0	1	1	0	0	0	0
ENSG00000060491	OGFR	Other	1	1	0	1	1	0	0	0	0
ENSG00000062650	WAPAL	Other	1	0	1	1	1	0	0	0	0
ENSG00000063241	ISOC2	Other	1	1	0	1	1	0	0	0	0
ENSG00000064651	SLC12A2	Other	1	0	1	1	1	0	0	0	0
ENSG00000064666	CNN2	Other	1	0	1	1	1	0	0	0	0
ENSG00000065000	AP3D1	Other	1	1	0	1	1	0	0	0	0
ENSG00000066651	TRMT11	Other	1	0	1	1	1	0	0	0	0
ENSG00000068024	HDAC4	EpiFactor	1	1	0	1	1	0	0	0	0
ENSG00000068383	INPP5A	Other	1	0	1	1	1	0	0	0	0
ENSG00000068650	ATP11A	Other	1	1	0	1	1	0	0	0	0
ENSG00000069849	ATP1B3	Other	1	0	1	1	1	0	0	0	0
ENSG00000069869	NEDD4	Other	1	0	1	1	1	0	0	0	0
ENSG00000070423	RNF126	Other	1	0	1	1	1	0	0	0	0
ENSG00000070476	ZXDC	TF	1	0	1	1	1	0	0	0	0
ENSG00000071242	RPS6KA2	Other	1	1	0	1	1	0	0	0	0
ENSG00000071575	TRIB2	Other	1	1	0	1	1	0	0	0	0
ENSG00000073350	LLGL2	Other	1	0	1	1	1	0	0	0	0
ENSG00000073578	SDHA	Other	1	1	0	1	1	0	0	0	0
ENSG00000073921	PICALM	Other	1	1	0	1	1	0	0	0	0
ENSG00000074071	MRPS34	Other	1	0	1	1	1	0	0	0	0
ENSG00000075275	CELSR1	Other	1	0	1	1	1	0	0	0	0
ENSG00000076321	KLHL20	Other	1	0	1	1	1	0	0	0	0
ENSG00000078043	PIAS2	Other	1	0	1	1	1	0	0	0	0
ENSG00000079263	SP140	TF/EpiFactor	1	1	0	1	1	0	0	0	0
ENSG00000079974	RABL2B	Other	1	1	0	1	1	0	0	0	0
ENSG00000080573	COL5A3	Other	1	0	1	1	1	0	0	0	0
ENSG00000080823	MOK	Other	1	0	1	1	1	0	0	0	0
ENSG00000081760	AACS	Other	1	0	1	1	1	0	0	0	0
ENSG00000082701	GSK3B	Other	1	1	0	1	1	0	0	0	0
ENSG00000085831	TTC39A	Other	1	1	0	1	1	0	0	0	0
ENSG00000085998	POMGNT1	Other	1	1	0	1	1	0	0	0	0
ENSG00000087253	LPCAT2	Other	1	1	0	1	1	0	0	0	0
ENSG00000087460	GNAS	Other	1	1	0	1	1	0	0	0	0
ENSG00000090447	TFAP4	TF	1	0	1	1	1	0	0	0	0
ENSG00000090857	PDPR	Other	1	1	0	1	1	0	0	0	0
ENSG00000091073	DTX2	Other	1	0	1	1	1	0	0	0	0
ENSG00000091592	NLRP1	Other	1	1	0	1	1	0	0	0	0
ENSG00000092108	SCFD1	Other	1	0	1	1	1	0	0	0	0
ENSG00000093167	LRRFIP2	Other	1	1	0	1	1	0	0	0	0
ENSG00000095261	PSMD5	Other	1	0	1	1	1	0	0	0	0
ENSG00000095380	NANS	Other	1	1	0	1	1	0	0	0	0
ENSG00000097021	ACOT7	Other	1	0	1	1	1	0	0	0	0
ENSG00000099814	CEP170B	Other	1	1	0	1	1	0	0	0	0
ENSG00000099817	POLR2E	Other	1	0	1	1	1	0	0	0	0
ENSG00000099899	TRMT2A	Other	1	1	0	1	1	0	0	0	0
ENSG00000099942	CRKL	Other	1	0	1	1	1	0	0	0	0
ENSG00000100056	DGCR14	Other	1	1	0	1	1	0	0	0	0
ENSG00000100181	TPTEP1	Other	1	1	0	1	1	0	0	0	0
ENSG00000100266	PACSIN2	Other	1	1	0	1	1	0	0	0	0
ENSG00000100365	NCF4	Other	1	0	1	1	1	0	0	0	0
ENSG00000100425	BRD1	EpiFactor	1	0	1	1	1	0	0	0	0
ENSG00000100429	HDAC10	EpiFactor	1	0	1	1	1	0	0	0	0
ENSG00000100490	CDKL1	Other	1	0	1	1	1	0	0	0	0
ENSG00000100997	ABHD12	Other	1	0	1	1	1	0	0	0	0
ENSG00000101109	STK4	EpiFactor	1	0	1	1	1	0	0	0	0
ENSG00000101152	DNAJC5	Other	1	1	0	1	1	0	0	0	0
ENSG00000101365	IDH3B	Other	1	1	0	1	1	0	0	0	0
ENSG00000101439	CST3	Other	1	1	0	1	1	0	0	0	0
ENSG00000101442	ACTR5	EpiFactor	1	0	1	1	1	0	0	0	0
ENSG00000101444	AHCY	Other	1	0	1	1	1	0	0	0	0
ENSG00000101639	CEP192	Other	1	0	1	1	1	0	0	0	0
ENSG00000102606	ARHGEF7	Other	1	1	0	1	1	0	0	0	0
ENSG00000102699	PARP4	Other	1	1	0	1	1	0	0	0	0
ENSG00000104290	FZD3	Other	1	1	0	1	1	0	0	0	0
ENSG00000104412	EMC2	Other	1	1	0	1	1	0	0	0	0
ENSG00000104689	TNFRSF10A	Other	1	1	0	1	1	0	0	0	0
ENSG00000104894	CD37	Other	1	0	1	1	1	0	0	0	0
ENSG00000105048	TNNT1	Other	1	0	1	1	1	0	0	0	0
ENSG00000105339	DENND3	Other	1	0	1	1	1	0	0	0	0
ENSG00000105372	RPS19	Other	1	1	0	1	1	0	0	0	0
ENSG00000105499	PLA2G4C	Other	1	0	1	1	1	0	0	0	0
ENSG00000105568	PPP2R1A	Other	1	0	1	1	1	0	0	0	0
ENSG00000105963	ADAP1	Other	1	0	1	1	1	0	0	0	0
ENSG00000105968	H2AFV	Other	1	0	1	1	1	0	0	0	0
ENSG00000105982	RNF32	Other	1	1	0	1	1	0	0	0	0
ENSG00000106009	BRAT1	Other	1	0	1	1	1	0	0	0	0
ENSG00000106070	GRB10	Other	1	0	1	1	1	0	0	0	0
ENSG00000106780	MEGF9	Other	1	1	0	1	1	0	0	0	0
ENSG00000107929	LARP4B	Other	1	1	0	1	1	0	0	0	0
ENSG00000107937	GTPBP4	Other	1	0	1	1	1	0	0	0	0
ENSG00000107968	MAP3K8	Other	1	1	0	1	1	0	0	0	0
ENSG00000108094	CUL2	EpiFactor	1	1	0	1	1	0	0	0	0
ENSG00000108187	PBLD	Other	1	0	1	1	1	0	0	0	0
ENSG00000108424	KPNB1	Other	1	0	1	1	1	0	0	0	0
ENSG00000108852	MPP2	Other	1	1	0	1	1	0	0	0	0
ENSG00000109501	WFS1	Other	1	1	0	1	1	0	0	0	0
ENSG00000110057	UNC93B1	Other	1	0	1	1	1	0	0	0	0
ENSG00000110435	PDHX	Other	1	1	0	1	1	0	0	0	0
ENSG00000110455	ACCS	Other	1	1	0	1	1	0	0	0	0
ENSG00000110583	NAA40	Other	1	0	1	1	1	0	0	0	0
ENSG00000111276	CDKN1B	Other	1	1	0	1	1	0	0	0	0
ENSG00000111647	UHRF1BP1L	Other	1	0	1	1	1	0	0	0	0
ENSG00000111669	TPI1	Other	1	1	0	1	1	0	0	0	0
ENSG00000111711	GOLT1B	Other	1	0	1	1	1	0	0	0	0
ENSG00000111846	GCNT2	Other	1	1	0	1	1	0	0	0	0
ENSG00000111885	MAN1A1	Other	1	0	1	1	1	0	0	0	0
ENSG00000111912	NCOA7	Other	1	1	0	1	1	0	0	0	0
ENSG00000112306	RPS12	Other	1	1	0	1	1	0	0	0	0
ENSG00000112592	TBP	TF	1	0	1	1	1	0	0	0	0
ENSG00000112685	EXOC2	Other	1	1	0	1	1	0	0	0	0
ENSG00000112787	FBRSL1	EpiFactor	1	0	1	1	1	0	0	0	0
ENSG00000112996	MRPS30	Other	1	1	0	1	1	0	0	0	0
ENSG00000113161	HMGCR	Other	1	1	0	1	1	0	0	0	0
ENSG00000113273	ARSB	Other	1	0	1	1	1	0	0	0	0
ENSG00000115687	PASK	Other	1	0	1	1	1	0	0	0	0
ENSG00000116062	MSH6	EpiFactor	1	1	0	1	1	0	0	0	0
ENSG00000116133	DHCR24	Other	1	1	0	1	1	0	0	0	0
ENSG00000116711	PLA2G4A	Other	1	1	0	1	1	0	0	0	0
ENSG00000117480	FAAH	Other	1	0	1	1	1	0	0	0	0
ENSG00000117877	CD3EAP	Other	1	0	1	1	1	0	0	0	0
ENSG00000118046	STK11	Other	1	0	1	1	1	0	0	0	0
ENSG00000118496	FBXO30	Other	1	1	0	1	1	0	0	0	0
ENSG00000118965	WDR35	Other	1	1	0	1	1	0	0	0	0
ENSG00000119686	FLVCR2	Other	1	0	1	1	1	0	0	0	0
ENSG00000120662	MTRF1	Other	1	0	1	1	1	0	0	0	0
ENSG00000120860	CCDC53	Other	1	0	1	1	1	0	0	0	0
ENSG00000121390	PSPC1	Other	1	1	0	1	1	0	0	0	0
ENSG00000122359	ANXA11	Other	1	0	1	1	1	0	0	0	0
ENSG00000122390	NAA60	EpiFactor	1	0	1	1	1	0	0	0	0
ENSG00000122643	NT5C3A	Other	1	1	0	1	1	0	0	0	0
ENSG00000122678	POLM	Other	1	0	1	1	1	0	0	0	0
ENSG00000123191	ATP7B	Other	1	1	0	1	1	0	0	0	0
ENSG00000123395	C12orf44	Other	1	1	0	1	1	0	0	0	0
ENSG00000123411	IKZF4	TF	1	0	1	1	1	0	0	0	0
ENSG00000123607	TTC21B	Other	1	1	0	1	1	0	0	0	0
ENSG00000124164	VAPB	Other	1	1	0	1	1	0	0	0	0
ENSG00000124224	PPP4R1L	Other	1	0	1	1	1	0	0	0	0
ENSG00000124299	PEPD	Other	1	1	0	1	1	0	0	0	0
ENSG00000124370	MCEE	Other	1	1	0	1	1	0	0	0	0
ENSG00000124614	RPS10	Other	1	0	1	1	1	0	0	0	0
ENSG00000124786	SLC35B3	Other	1	1	0	1	1	0	0	0	0
ENSG00000124831	LRRFIP1	Other	1	1	0	1	1	0	0	0	0
ENSG00000125484	GTF3C4	EpiFactor	1	1	0	1	1	0	0	0	0
ENSG00000125510	OPRL1	Other	1	1	0	1	1	0	0	0	0
ENSG00000125629	INSIG2	Other	1	0	1	1	1	0	0	0	0
ENSG00000125814	NAPB	Other	1	1	0	1	1	0	0	0	0
ENSG00000125863	MKKS	Other	1	0	1	1	1	0	0	0	0
ENSG00000125864	BFSP1	Other	1	1	0	1	1	0	0	0	0
ENSG00000125945	ZNF436	TF	1	0	1	1	1	0	0	0	0
ENSG00000127124	HIVEP3	TF	1	1	0	1	1	0	0	0	0
ENSG00000127311	HELB	Other	1	0	1	1	1	0	0	0	0
ENSG00000127507	EMR2	Other	1	1	0	1	1	0	0	0	0
ENSG00000127666	TICAM1	Other	1	1	0	1	1	0	0	0	0
ENSG00000127952	STYXL1	Other	1	1	0	1	1	0	0	0	0
ENSG00000128165	ADM2	Other	1	1	0	1	1	0	0	0	0
ENSG00000128185	DGCR6L	Other	1	0	1	1	1	0	0	0	0
ENSG00000129003	VPS13C	Other	1	1	0	1	1	0	0	0	0
ENSG00000129625	REEP5	Other	1	1	0	1	1	0	0	0	0
ENSG00000129657	SEC14L1	Other	1	1	0	1	1	0	0	0	0
ENSG00000130544	ZNF557	TF	1	0	1	1	1	0	0	0	0
ENSG00000130592	LSP1	Other	1	1	0	1	1	0	0	0	0
ENSG00000130598	TNNI2	Other	1	1	0	1	1	0	0	0	0
ENSG00000130695	CEP85	Other	1	0	1	1	1	0	0	0	0
ENSG00000130758	MAP3K10	Other	1	1	0	1	1	0	0	0	0
ENSG00000131037	EPS8L1	Other	1	1	0	1	1	0	0	0	0
ENSG00000131042	LILRB2	Other	1	1	0	1	1	0	0	0	0
ENSG00000131187	F12	Other	1	0	1	1	1	0	0	0	0
ENSG00000131781	FMO5	Other	1	1	0	1	1	0	0	0	0
ENSG00000131791	PRKAB2	EpiFactor	1	0	1	1	1	0	0	0	0
ENSG00000132406	TMEM128	Other	1	1	0	1	1	0	0	0	0
ENSG00000132600	PRMT7	EpiFactor	1	0	1	1	1	0	0	0	0
ENSG00000132694	ARHGEF11	Other	1	0	1	1	1	0	0	0	0
ENSG00000132744	ACY3	Other	1	1	0	1	1	0	0	0	0
ENSG00000133104	SPG20	Other	1	1	0	1	1	0	0	0	0
ENSG00000133275	CSNK1G2	Other	1	0	1	1	1	0	0	0	0
ENSG00000133597	ADCK2	Other	1	0	1	1	1	0	0	0	0
ENSG00000133627	ACTR3B	EpiFactor	1	0	1	1	1	0	0	0	0
ENSG00000134183	GNAT2	Other	1	1	0	1	1	0	0	0	0
ENSG00000134539	KLRD1	Other	1	1	0	1	1	0	0	0	0
ENSG00000134758	RNF138	Other	1	1	0	1	1	0	0	0	0
ENSG00000134986	NREP	Other	1	1	0	1	1	0	0	0	0
ENSG00000135213	POM121C	Other	1	1	0	1	1	0	0	0	0
ENSG00000135643	KCNMB4	Other	1	1	0	1	1	0	0	0	0
ENSG00000135678	CPM	Other	1	1	0	1	1	0	0	0	0
ENSG00000135736	CCDC102A	Other	1	1	0	1	1	0	0	0	0
ENSG00000135845	PIGC	Other	1	1	0	1	1	0	0	0	0
ENSG00000136045	PWP1	Other	1	0	1	1	1	0	0	0	0
ENSG00000136098	NEK3	Other	1	0	1	1	1	0	0	0	0
ENSG00000136100	VPS36	Other	1	0	1	1	1	0	0	0	0
ENSG00000136754	ABI1	Other	1	0	1	1	1	0	0	0	0
ENSG00000136811	ODF2	Other	1	0	1	1	1	0	0	0	0
ENSG00000136869	TLR4	Other	1	1	0	1	1	0	0	0	0
ENSG00000136870	ZNF189	TF	1	1	0	1	1	0	0	0	0
ENSG00000136935	GOLGA1	Other	1	1	0	1	1	0	0	0	0
ENSG00000136999	NOV	Other	1	1	0	1	1	0	0	0	0
ENSG00000137135	ARHGEF39	Other	1	1	0	1	1	0	0	0	0
ENSG00000137267	TUBB2A	Other	1	1	0	1	1	0	0	0	0
ENSG00000137275	RIPK1	Other	1	0	1	1	1	0	0	0	0
ENSG00000137713	PPP2R1B	Other	1	1	0	1	1	0	0	0	0
ENSG00000137841	PLCB2	Other	1	1	0	1	1	0	0	0	0
ENSG00000138246	DNAJC13	Other	1	0	1	1	1	0	0	0	0
ENSG00000138670	RASGEF1B	Other	1	1	0	1	1	0	0	0	0
ENSG00000138835	RGS3	Other	1	1	0	1	1	0	0	0	0
ENSG00000139160	METTL20	Other	1	0	1	1	1	0	0	0	0
ENSG00000139370	SLC15A4	Other	1	0	1	1	1	0	0	0	0
ENSG00000139372	TDG	EpiFactor	1	1	0	1	1	0	0	0	0
ENSG00000139567	ACVRL1	Other	1	1	0	1	1	0	0	0	0
ENSG00000140307	GTF2A2	Other	1	1	0	1	1	0	0	0	0
ENSG00000140545	MFGE8	Other	1	0	1	1	1	0	0	0	0
ENSG00000140564	FURIN	Other	1	1	0	1	1	0	0	0	0
ENSG00000140987	ZSCAN32	TF	1	0	1	1	1	0	0	0	0
ENSG00000141034	GID4	Other	1	1	0	1	1	0	0	0	0
ENSG00000141101	NOB1	Other	1	0	1	1	1	0	0	0	0
ENSG00000141543	EIF4A3	Other	1	0	1	1	1	0	0	0	0
ENSG00000141560	FN3KRP	Other	1	0	1	1	1	0	0	0	0
ENSG00000141568	FOXK2	TF	1	0	1	1	1	0	0	0	0
ENSG00000141837	CACNA1A	Other	1	0	1	1	1	0	0	0	0
ENSG00000142528	ZNF473	TF	1	0	1	1	1	0	0	0	0
ENSG00000142599	RERE	Other	1	1	0	1	1	0	0	0	0
ENSG00000143155	TIPRL	Other	1	1	0	1	1	0	0	0	0
ENSG00000143167	GPA33	Other	1	1	0	1	1	0	0	0	0
ENSG00000143226	FCGR2A	Other	1	1	0	1	1	0	0	0	0
ENSG00000143398	PIP5K1A	Other	1	1	0	1	1	0	0	0	0
ENSG00000143515	ATP8B2	Other	1	1	0	1	1	0	0	0	0
ENSG00000143595	AQP10	Other	1	1	0	1	1	0	0	0	0
ENSG00000143653	SCCPDH	Other	1	0	1	1	1	0	0	0	0
ENSG00000143870	PDIA6	Other	1	0	1	1	1	0	0	0	0
ENSG00000144218	AFF3	Other	1	1	0	1	1	0	0	0	0
ENSG00000144455	SUMF1	Other	1	0	1	1	1	0	0	0	0
ENSG00000144524	COPS7B	Other	1	0	1	1	1	0	0	0	0
ENSG00000144560	VGLL4	Other	1	1	0	1	1	0	0	0	0
ENSG00000144647	POMGNT2	Other	1	1	0	1	1	0	0	0	0
ENSG00000144712	CAND2	Other	1	1	0	1	1	0	0	0	0
ENSG00000144909	OSBPL11	Other	1	1	0	1	1	0	0	0	0
ENSG00000145354	CISD2	Other	1	0	1	1	1	0	0	0	0
ENSG00000145423	SFRP2	Other	1	0	1	1	1	0	0	0	0
ENSG00000145476	CYP4V2	Other	1	0	1	1	1	0	0	0	0
ENSG00000145495	MARCH6	Other	1	0	1	1	1	0	0	0	0
ENSG00000145632	PLK2	Other	1	1	0	1	1	0	0	0	0
ENSG00000145781	COMMD10	Other	1	1	0	1	1	0	0	0	0
ENSG00000146587	RBAK	TF	1	1	0	1	1	0	0	0	0
ENSG00000147526	TACC1	Other	1	1	0	1	1	0	0	0	0
ENSG00000148396	SEC16A	Other	1	1	0	1	1	0	0	0	0
ENSG00000148572	NRBF2	Other	1	0	1	1	1	0	0	0	0
ENSG00000148600	CDHR1	Other	1	1	0	1	1	0	0	0	0
ENSG00000148655	C10orf11	Other	1	1	0	1	1	0	0	0	0
ENSG00000148824	MTG1	Other	1	0	1	1	1	0	0	0	0
ENSG00000149089	APIP	Other	1	0	1	1	1	0	0	0	0
ENSG00000149262	INTS4	Other	1	1	0	1	1	0	0	0	0
ENSG00000149527	PLCH2	Other	1	1	0	1	1	0	0	0	0
ENSG00000149781	FERMT3	Other	1	1	0	1	1	0	0	0	0
ENSG00000150048	CLEC1A	Other	1	0	1	1	1	0	0	0	0
ENSG00000150316	CWC15	Other	1	1	0	1	1	0	0	0	0
ENSG00000151093	OXSM	Other	1	0	1	1	1	0	0	0	0
ENSG00000152242	C18orf25	Other	1	0	1	1	1	0	0	0	0
ENSG00000152464	RPP38	Other	1	1	0	1	1	0	0	0	0
ENSG00000152582	SPEF2	Other	1	1	0	1	1	0	0	0	0
ENSG00000152620	NADK2	Other	1	0	1	1	1	0	0	0	0
ENSG00000152804	HHEX	TF	1	0	1	1	1	0	0	0	0
ENSG00000152926	ZNF117	TF	1	1	0	1	1	0	0	0	0
ENSG00000153107	ANAPC1	Other	1	0	1	1	1	0	0	0	0
ENSG00000153574	RPIA	Other	1	0	1	1	1	0	0	0	0
ENSG00000153975	ZUFSP	TF	1	0	1	1	1	0	0	0	0
ENSG00000155158	TTC39B	Other	1	0	1	1	1	0	0	0	0
ENSG00000156171	DRAM2	Other	1	0	1	1	1	0	0	0	0
ENSG00000156239	N6AMT1	Other	1	0	1	1	1	0	0	0	0
ENSG00000156261	CCT8	Other	1	0	1	1	1	0	0	0	0
ENSG00000156414	TDRD9	Other	1	0	1	1	1	0	0	0	0
ENSG00000156711	MAPK13	Other	1	0	1	1	1	0	0	0	0
ENSG00000156973	PDE6D	Other	1	0	1	1	1	0	0	0	0
ENSG00000157303	SUSD3	Other	1	1	0	1	1	0	0	0	0
ENSG00000157978	LDLRAP1	Other	1	0	1	1	1	0	0	0	0
ENSG00000158109	TPRG1L	Other	1	0	1	1	1	0	0	0	0
ENSG00000158717	RNF166	Other	1	0	1	1	1	0	0	0	0
ENSG00000159131	GART	Other	1	1	0	1	1	0	0	0	0
ENSG00000159788	RGS12	Other	1	1	0	1	1	0	0	0	0
ENSG00000159842	ABR	Other	1	0	1	1	1	0	0	0	0
ENSG00000160072	ATAD3B	Other	1	0	1	1	1	0	0	0	0
ENSG00000160256	FAM207A	Other	1	1	0	1	1	0	0	0	0
ENSG00000160284	SPATC1L	Other	1	1	0	1	1	0	0	0	0
ENSG00000160299	PCNT	Other	1	0	1	1	1	0	0	0	0
ENSG00000160695	VPS11	Other	1	1	0	1	1	0	0	0	0
ENSG00000160949	TONSL	EpiFactor	1	0	1	1	1	0	0	0	0
ENSG00000161653	NAGS	Other	1	0	1	1	1	0	0	0	0
ENSG00000162063	CCNF	Other	1	0	1	1	1	0	0	0	0
ENSG00000162066	AMDHD2	Other	1	0	1	1	1	0	0	0	0
ENSG00000162078	ZG16B	Other	1	1	0	1	1	0	0	0	0
ENSG00000162174	ASRGL1	Other	1	0	1	1	1	0	0	0	0
ENSG00000162367	TAL1	TF	1	1	0	1	1	0	0	0	0
ENSG00000162368	CMPK1	Other	1	0	1	1	1	0	0	0	0
ENSG00000162600	OMA1	Other	1	1	0	1	1	0	0	0	0
ENSG00000162729	IGSF8	Other	1	1	0	1	1	0	0	0	0
ENSG00000163013	FBXO41	Other	1	0	1	1	1	0	0	0	0
ENSG00000163069	SGCB	Other	1	0	1	1	1	0	0	0	0
ENSG00000163322	FAM175A	EpiFactor	1	0	1	1	1	0	0	0	0
ENSG00000163528	CHCHD4	Other	1	0	1	1	1	0	0	0	0
ENSG00000163596	ICA1L	Other	1	1	0	1	1	0	0	0	0
ENSG00000163686	ABHD6	Other	1	0	1	1	1	0	0	0	0
ENSG00000163754	GYG1	Other	1	0	1	1	1	0	0	0	0
ENSG00000163755	HPS3	Other	1	0	1	1	1	0	0	0	0
ENSG00000163866	SMIM12	Other	1	0	1	1	1	0	0	0	0
ENSG00000163959	SLC51A	Other	1	0	1	1	1	0	0	0	0
ENSG00000164024	METAP1	Other	1	1	0	1	1	0	0	0	0
ENSG00000164296	TIGD6	TF	1	0	1	1	1	0	0	0	0
ENSG00000164344	KLKB1	Other	1	1	0	1	1	0	0	0	0
ENSG00000164346	NSA2	Other	1	0	1	1	1	0	0	0	0
ENSG00000164465	DCBLD1	Other	1	0	1	1	1	0	0	0	0
ENSG00000164815	ORC5	Other	1	0	1	1	1	0	0	0	0
ENSG00000164821	DEFA4	Other	1	0	1	1	1	0	0	0	0
ENSG00000165006	UBAP1	Other	1	1	0	1	1	0	0	0	0
ENSG00000165025	SYK	Other	1	0	1	1	1	0	0	0	0
ENSG00000165181	C9orf84	Other	1	1	0	1	1	0	0	0	0
ENSG00000165406	MARCH8	Other	1	1	0	1	1	0	0	0	0
ENSG00000165416	SUGT1	Other	1	0	1	1	1	0	0	0	0
ENSG00000165548	TMEM63C	Other	1	0	1	1	1	0	0	0	0
ENSG00000165637	VDAC2	Other	1	1	0	1	1	0	0	0	0
ENSG00000166123	GPT2	Other	1	1	0	1	1	0	0	0	0
ENSG00000166532	RIMKLB	Other	1	1	0	1	1	0	0	0	0
ENSG00000166689	PLEKHA7	Other	1	0	1	1	1	0	0	0	0
ENSG00000166987	MBD6	TF/EpiFactor	1	1	0	1	1	0	0	0	0
ENSG00000167114	SLC27A4	Other	1	0	1	1	1	0	0	0	0
ENSG00000167202	TBC1D2B	Other	1	0	1	1	1	0	0	0	0
ENSG00000167562	ZNF701	TF	1	0	1	1	1	0	0	0	0
ENSG00000167711	SERPINF2	Other	1	1	0	1	1	0	0	0	0
ENSG00000167740	CYB5D2	Other	1	0	1	1	1	0	0	0	0
ENSG00000167747	C19orf48	Other	1	1	0	1	1	0	0	0	0
ENSG00000167994	RAB3IL1	Other	1	1	0	1	1	0	0	0	0
ENSG00000168028	RPSA	Other	1	1	0	1	1	0	0	0	0
ENSG00000168297	PXK	Other	1	0	1	1	1	0	0	0	0
ENSG00000168397	ATG4B	Other	1	0	1	1	1	0	0	0	0
ENSG00000168411	RFWD3	Other	1	0	1	1	1	0	0	0	0
ENSG00000168646	AXIN2	Other	1	1	0	1	1	0	0	0	0
ENSG00000168827	GFM1	Other	1	1	0	1	1	0	0	0	0
ENSG00000169231	THBS3	Other	1	0	1	1	1	0	0	0	0
ENSG00000169299	PGM2	Other	1	1	0	1	1	0	0	0	0
ENSG00000169413	RNASE6	Other	1	1	0	1	1	0	0	0	0
ENSG00000169429	IL8	Other	1	0	1	1	1	0	0	0	0
ENSG00000169439	SDC2	Other	1	1	0	1	1	0	0	0	0
ENSG00000169570	DTWD2	Other	1	0	1	1	1	0	0	0	0
ENSG00000170260	ZNF212	TF	1	1	0	1	1	0	0	0	0
ENSG00000170266	GLB1	Other	1	1	0	1	1	0	0	0	0
ENSG00000170365	SMAD1	TF	1	0	1	1	1	0	0	0	0
ENSG00000170502	NUDT9	Other	1	0	1	1	1	0	0	0	0
ENSG00000170571	EMB	Other	1	1	0	1	1	0	0	0	0
ENSG00000170852	KBTBD2	Other	1	0	1	1	1	0	0	0	0
ENSG00000171044	XKR6	Other	1	1	0	1	1	0	0	0	0
ENSG00000171444	MCC	Other	1	1	0	1	1	0	0	0	0
ENSG00000171503	ETFDH	Other	1	1	0	1	1	0	0	0	0
ENSG00000171729	TMEM51	Other	1	0	1	1	1	0	0	0	0
ENSG00000171813	PWWP2B	Other	1	1	0	1	1	0	0	0	0
ENSG00000172005	MAL	Other	1	0	1	1	1	0	0	0	0
ENSG00000172037	LAMB2	Other	1	1	0	1	1	0	0	0	0
ENSG00000172059	KLF11	TF	1	1	0	1	1	0	0	0	0
ENSG00000172667	ZMAT3	Other	1	0	1	1	1	0	0	0	0
ENSG00000172794	RAB37	Other	1	0	1	1	1	0	0	0	0
ENSG00000173011	TADA2B	EpiFactor	1	0	1	1	1	0	0	0	0
ENSG00000173145	NOC3L	Other	1	1	0	1	1	0	0	0	0
ENSG00000173221	GLRX	Other	1	0	1	1	1	0	0	0	0
ENSG00000173868	PHOSPHO1	Other	1	1	0	1	1	0	0	0	0
ENSG00000174177	CTU2	Other	1	1	0	1	1	0	0	0	0
ENSG00000174227	PIGG	Other	1	1	0	1	1	0	0	0	0
ENSG00000174684	B3GNT1	Other	1	0	1	1	1	0	0	0	0
ENSG00000175221	MED16	Other	1	0	1	1	1	0	0	0	0
ENSG00000175470	PPP2R2D	Other	1	0	1	1	1	0	0	0	0
ENSG00000175727	MLXIP	TF	1	0	1	1	1	0	0	0	0
ENSG00000176485	PLA2G16	Other	1	1	0	1	1	0	0	0	0
ENSG00000176595	KBTBD11	Other	1	1	0	1	1	0	0	0	0
ENSG00000176659	C20orf197	Other	1	1	0	1	1	0	0	0	0
ENSG00000177370	TIMM22	Other	1	1	0	1	1	0	0	0	0
ENSG00000177873	ZNF619	TF	1	1	0	1	1	0	0	0	0
ENSG00000178295	GEN1	Other	1	0	1	1	1	0	0	0	0
ENSG00000178700	DHFRL1	Other	1	0	1	1	1	0	0	0	0
ENSG00000178980	SEPW1	Other	1	1	0	1	1	0	0	0	0
ENSG00000179242	CDH4	Other	1	0	1	1	1	0	0	0	0
ENSG00000180953	ST20	Other	1	1	0	1	1	0	0	0	0
ENSG00000181007	ZFP82	TF	1	1	0	1	1	0	0	0	0
ENSG00000181045	SLC26A11	Other	1	0	1	1	1	0	0	0	0
ENSG00000181444	ZNF467	TF	1	0	1	1	1	0	0	0	0
ENSG00000181804	SLC9A9	Other	1	0	1	1	1	0	0	0	0
ENSG00000182359	KBTBD3	Other	1	1	0	1	1	0	0	0	0
ENSG00000182372	CLN8	Other	1	1	0	1	1	0	0	0	0
ENSG00000183688	FAM101B	Other	1	0	1	1	1	0	0	0	0
ENSG00000183784	C9orf66	Other	1	1	0	1	1	0	0	0	0
ENSG00000184545	DUSP8	Other	1	1	0	1	1	0	0	0	0
ENSG00000184743	ATL3	Other	1	1	0	1	1	0	0	0	0
ENSG00000185015	CA13	Other	1	0	1	1	1	0	0	0	0
ENSG00000185100	ADSSL1	Other	1	1	0	1	1	0	0	0	0
ENSG00000185278	ZBTB37	TF	1	0	1	1	1	0	0	0	0
ENSG00000185418	TARSL2	Other	1	1	0	1	1	0	0	0	0
ENSG00000185527	PDE6G	Other	1	0	1	1	1	0	0	0	0
ENSG00000185608	MRPL40	Other	1	1	0	1	1	0	0	0	0
ENSG00000185760	KCNQ5	Other	1	0	1	1	1	0	0	0	0
ENSG00000186017	ZNF566	TF	1	1	0	1	1	0	0	0	0
ENSG00000186235	AC016757.3	Other	1	1	0	1	1	0	0	0	0
ENSG00000186283	TOR3A	Other	1	0	1	1	1	0	0	0	0
ENSG00000186300	ZNF555	TF	1	1	0	1	1	0	0	0	0
ENSG00000186409	CCDC30	Other	1	1	0	1	1	0	0	0	0
ENSG00000186716	BCR	Other	1	1	0	1	1	0	0	0	0
ENSG00000187017	ESPN	Other	1	1	0	1	1	0	0	0	0
ENSG00000187045	TMPRSS6	Other	1	1	0	1	1	0	0	0	0
ENSG00000187109	NAP1L1	EpiFactor	1	0	1	1	1	0	0	0	0
ENSG00000187187	ZNF546	TF	1	0	1	1	1	0	0	0	0
ENSG00000187210	GCNT1	Other	1	0	1	1	1	0	0	0	0
ENSG00000187446	CHP1	Other	1	0	1	1	1	0	0	0	0
ENSG00000187630	DHRS4L2	Other	1	0	1	1	1	0	0	0	0
ENSG00000187726	DNAJB13	Other	1	0	1	1	1	0	0	0	0
ENSG00000188157	AGRN	Other	1	0	1	1	1	0	0	0	0
ENSG00000188342	GTF2F2	Other	1	0	1	1	1	0	0	0	0
ENSG00000188542	DUSP28	Other	1	1	0	1	1	0	0	0	0
ENSG00000188820	FAM26F	Other	1	0	1	1	1	0	0	0	0
ENSG00000189190	ZNF600	TF	1	0	1	1	1	0	0	0	0
ENSG00000189362	TMEM194B	Other	1	0	1	1	1	0	0	0	0
ENSG00000196172	ZNF681	TF	1	0	1	1	1	0	0	0	0
ENSG00000196247	ZNF107	TF	1	0	1	1	1	0	0	0	0
ENSG00000196352	CD55	Other	1	1	0	1	1	0	0	0	0
ENSG00000196363	WDR5	EpiFactor	1	1	0	1	1	0	0	0	0
ENSG00000196417	ZNF765	TF	1	1	0	1	1	0	0	0	0
ENSG00000196422	PPP1R26	Other	1	0	1	1	1	0	0	0	0
ENSG00000196683	TOMM7	Other	1	1	0	1	1	0	0	0	0
ENSG00000196700	ZNF512B	TF	1	0	1	1	1	0	0	0	0
ENSG00000196705	ZNF431	TF	1	0	1	1	1	0	0	0	0
ENSG00000197077	KIAA1671	Other	1	1	0	1	1	0	0	0	0
ENSG00000197157	SND1	Other	1	1	0	1	1	0	0	0	0
ENSG00000197302	ZNF720	Other	1	0	1	1	1	0	0	0	0
ENSG00000197872	FAM49A	Other	1	0	1	1	1	0	0	0	0
ENSG00000197971	MBP	Other	1	1	0	1	1	0	0	0	0
ENSG00000198015	MRPL42	Other	1	0	1	1	1	0	0	0	0
ENSG00000198039	ZNF273	TF	1	1	0	1	1	0	0	0	0
ENSG00000198150	AC135178.1	Other	1	0	1	1	1	0	0	0	0
ENSG00000198189	HSD17B11	Other	1	1	0	1	1	0	0	0	0
ENSG00000198353	HOXC4	TF	1	0	1	1	1	0	0	0	0
ENSG00000198369	SPRED2	Other	1	0	1	1	1	0	0	0	0
ENSG00000198464	ZNF480	TF	1	1	0	1	1	0	0	0	0
ENSG00000198513	ATL1	Other	1	1	0	1	1	0	0	0	0
ENSG00000198598	MMP17	Other	1	1	0	1	1	0	0	0	0
ENSG00000198663	C6orf89	Other	1	1	0	1	1	0	0	0	0
ENSG00000198719	DLL1	Other	1	1	0	1	1	0	0	0	0
ENSG00000198752	CDC42BPB	Other	1	1	0	1	1	0	0	0	0
ENSG00000198799	LRIG2	Other	1	1	0	1	1	0	0	0	0
ENSG00000203791	METTL10	Other	1	1	0	1	1	0	0	0	0
ENSG00000203965	EFCAB7	Other	1	1	0	1	1	0	0	0	0
ENSG00000204138	PHACTR4	Other	1	1	0	1	1	0	0	0	0
ENSG00000204839	MROH6	Other	1	0	1	1	1	0	0	0	0
ENSG00000204946	ZNF783	TF	1	1	0	1	1	0	0	0	0
ENSG00000205047	FLJ00104	Other	1	0	1	1	1	0	0	0	0
ENSG00000205670	SMIM11	Other	1	0	1	1	1	0	0	0	0
ENSG00000212916	MAP10	Other	1	1	0	1	1	0	0	0	0
ENSG00000213366	GSTM2	Other	1	1	0	1	1	0	0	0	0
ENSG00000214087	ARL16	Other	1	1	0	1	1	0	0	0	0
ENSG00000223768	LINC00205	Other	1	0	1	1	1	0	0	0	0
ENSG00000224870	RP4-758J18.2	Other	1	0	1	1	1	0	0	0	0
ENSG00000225331	AP001055.6	Other	1	1	0	1	1	0	0	0	0
ENSG00000226091	LINC00937	Other	1	1	0	1	1	0	0	0	0
ENSG00000226321	AC104809.3	Other	1	1	0	1	1	0	0	0	0
ENSG00000226479	TMEM185B	Other	1	0	1	1	1	0	0	0	0
ENSG00000227124	ZNF717	TF	1	1	0	1	1	0	0	0	0
ENSG00000228594	C1orf233	Other	1	0	1	1	1	0	0	0	0
ENSG00000229809	ZNF688	TF	1	1	0	1	1	0	0	0	0
ENSG00000229833	PET100	Other	1	1	0	1	1	0	0	0	0
ENSG00000230989	HSBP1	Other	1	0	1	1	1	0	0	0	0
ENSG00000231412	CTC-490G23.2	Other	1	1	0	1	1	0	0	0	0
ENSG00000232098	CTD-2619J13.14	Other	1	0	1	1	1	0	0	0	0
ENSG00000232677	LINC00665	Other	1	1	0	1	1	0	0	0	0
ENSG00000232956	SNHG15	Other	1	0	1	1	1	0	0	0	0
ENSG00000233013	FAM157B	Other	1	0	1	1	1	0	0	0	0
ENSG00000235117	RP11-229P13.20	Other	1	0	1	1	1	0	0	0	0
ENSG00000235192	AC009495.2	Other	1	0	1	1	1	0	0	0	0
ENSG00000236438	FAM157A	Other	1	1	0	1	1	0	0	0	0
ENSG00000239961	LILRA4	Other	1	1	0	1	1	0	0	0	0
ENSG00000241468	ATP5J2	Other	1	0	1	1	1	0	0	0	0
ENSG00000244607	CCDC13	Other	1	0	1	1	1	0	0	0	0
ENSG00000247626	MARS2	Other	1	1	0	1	1	0	0	0	0
ENSG00000248508	SRP14-AS1	Other	1	1	0	1	1	0	0	0	0
ENSG00000249915	PDCD6	Other	1	0	1	1	1	0	0	0	0
ENSG00000250571	GLI4	TF	1	1	0	1	1	0	0	0	0
ENSG00000256223	ZNF10	TF	1	1	0	1	1	0	0	0	0
ENSG00000256576	RP13-977J11.2	Other	1	0	1	1	1	0	0	0	0
ENSG00000257103	LSM14A	Other	1	0	1	1	1	0	0	0	0
ENSG00000258315	C17orf49	EpiFactor	1	0	1	1	1	0	0	0	0
ENSG00000259363	CTD-2054N24.2	Other	1	1	0	1	1	0	0	0	0
ENSG00000259758	CASC7	Other	1	1	0	1	1	0	0	0	0
ENSG00000259834	RP11-284N8.3	Other	1	1	0	1	1	0	0	0	0
ENSG00000260257	RP5-1085F17.3	Other	1	1	0	1	1	0	0	0	0
ENSG00000260698	RP11-439E19.9	Other	1	1	0	1	1	0	0	0	0
ENSG00000260804	RP11-566E18.3	Other	1	1	0	1	1	0	0	0	0
ENSG00000261218	RP11-960L18.1	Other	1	1	0	1	1	0	0	0	0
ENSG00000261584	RP11-457M11.5	Other	1	1	0	1	1	0	0	0	0
ENSG00000262877	RP11-1055B8.4	Other	1	1	0	1	1	0	0	0	0
ENSG00000266709	RP11-214O1.2	Other	1	0	1	1	1	0	0	0	0
ENSG00000267475	CTD-2538C1.2	Other	1	1	0	1	1	0	0	0	0
