# Supplementary material for: Genome-wide identification of genes regulating DNA methylation using genetic anchors for causal inference
Source: Genome Biol. 2020 Aug 28;21:220. doi: 10.1186/s13059-020-02114-z (PMC7453518; doi:10.1186/s13059-020-02114-z)
Supplement: Supplementary file 7 — Additional file 7: Table S7. Target CpGs that overlap with trans-meQTL CpGs identified by Lemire et al. [file 13059_2020_2114_MOESM7_ESM.csv]

CpG	GI	meQTL_SNP	Distance_GI_SNP
cg00026974	ENSG00000150401	rs4150792	143703
cg00093542	ENSG00000174652	rs7257650	19170
cg00170236	ENSG00000147813	rs1563148	3499
cg00223950	ENSG00000198015	rs6538421	0
cg00252594	ENSG00000103196	rs10735709	8071
cg00273068	ENSG00000122687	rs2270052	9558
cg00336149	ENSG00000198131	rs260452	0
cg00336149	ENSG00000198429	rs260452	46741729
cg00338702	ENSG00000184939	rs1069288	0
cg00414689	ENSG00000157551	rs715079	0
cg00442109	ENSG00000198521	rs8106346	341387
cg00499237	ENSG00000146232	rs230539	NA
cg00499237	ENSG00000109320	rs230539	0
cg00646200	ENSG00000269996	rs11249429	156498
cg00730373	ENSG00000109320	rs230520	0
cg00931577	ENSG00000071242	rs435688	62879
cg00969119	ENSG00000184939	rs1069288	0
cg01026373	ENSG00000258839	rs3803689	178468
cg01027929	ENSG00000128891	rs4924481	0
cg01071159	ENSG00000174652	rs10411115	32843
cg01087832	ENSG00000146540	rs2397	32098
cg01134436	ENSG00000186235	rs11900963	167730
cg01268824	ENSG00000138468	rs2141180	0
cg01268824	ENSG00000114770	rs2141180	82458664
cg01286935	ENSG00000183087	rs1109630	253943
cg01286935	ENSG00000260910	rs1109630	189172
cg01405143	ENSG00000204104	rs907103	254999
cg01420011	ENSG00000182359	rs1893857	120679
cg01461718	ENSG00000160961	rs10407394	0
cg01509141	ENSG00000171421	rs931508	59743
cg01554453	ENSG00000137265	rs1599801	NA
cg01560972	ENSG00000243708	rs1918310	55029
cg01577292	ENSG00000104731	rs4843669	20157
cg01594514	ENSG00000260910	rs7998148	150414
cg01601299	ENSG00000243708	rs1918310	55029
cg01624645	ENSG00000198106	rs749809	0
cg01644850	ENSG00000138468	rs2141180	0
cg01706698	ENSG00000196867	rs3813141	9652
cg01706698	ENSG00000018869	rs3813141	135749
cg01710146	ENSG00000130598	rs4752761	35611
cg01717063	ENSG00000168411	rs8062783	0
cg01777103	ENSG00000120860	rs2036771	61876
cg01886893	ENSG00000114544	rs6438963	0
cg01892528	ENSG00000169439	rs750342	19290
cg01970784	ENSG00000158669	rs11996670	0
cg02026141	ENSG00000198521	rs8106346	341387
cg02063817	ENSG00000261589	rs4653081	NA
cg02063817	ENSG00000160094	rs4653081	53509
cg02128325	ENSG00000171045	rs7838831	4411
cg02174232	ENSG00000160961	rs6511958	0
cg02178058	ENSG00000110583	rs7118913	42334
cg02178058	ENSG00000176485	rs7118913	279740
cg02178058	ENSG00000184743	rs7118913	224702
cg02201215	ENSG00000198106	rs12933229	80638
cg02377073	ENSG00000249915	rs10512619	63867
cg02431597	ENSG00000188785	rs7250371	40132
cg02470959	ENSG00000269996	rs828498	28024482
cg02477834	ENSG00000131042	rs4022330	0
cg02477834	ENSG00000239961	rs4022330	62612
cg02491787	ENSG00000178700	rs9850669	462929
cg02613435	ENSG00000142347	rs11882393	0
cg02634341	ENSG00000261589	rs17817448	145700
cg02637438	ENSG00000164877	rs6463855	31326
cg02652978	ENSG00000198106	rs252299	30151
cg02664162	ENSG00000250312	rs11735742	0
cg02670466	ENSG00000168818	rs16835979	91202
cg02725398	ENSG00000214548	rs17099617	75258
cg02734259	ENSG00000013573	rs11610422	154943
cg02775382	ENSG00000091592	rs4985687	151382
cg02800362	ENSG00000166377	rs12607938	177397
cg02855309	ENSG00000197937	rs4801958	5475
cg02870950	ENSG00000104731	rs1599801	0
cg02879784	ENSG00000003056	rs1805731	0
cg02953927	ENSG00000131781	rs6703187	0
cg02953927	ENSG00000131791	rs6703187	54776
cg03016975	ENSG00000158457	rs2167272	36333
cg03035248	ENSG00000134684	rs1300114	42417
cg03085549	ENSG00000158805	rs9859077	NA
cg03128972	ENSG00000180539	rs2049040	24751
cg03156396	ENSG00000146918	rs3793177	0
cg03156396	ENSG00000117868	rs3793177	83410
cg03156396	ENSG00000126870	rs3793177	208993
cg03195269	ENSG00000005513	rs4984990	42918
cg03234186	ENSG00000138468	rs9859077	0
cg03234186	ENSG00000114770	rs9859077	82501319
cg03301848	ENSG00000083828	rs4801528	58047
cg03574360	ENSG00000011590	rs2227278	0
cg03688818	ENSG00000160961	rs6511958	0
cg03701266	ENSG00000110172	rs4268468	48043
cg03720617	ENSG00000250312	rs11735742	0
cg03720617	ENSG00000182903	rs11735742	277053
cg03743982	ENSG00000158805	rs9859077	NA
cg03745912	ENSG00000135845	rs1063412	0
cg03800765	ENSG00000149548	rs7103312	5211
cg03801128	ENSG00000149548	rs3802806	11721
cg03920392	ENSG00000158792	rs164749	54526
cg03929796	ENSG00000109320	rs230539	0
cg03944143	ENSG00000197302	rs1528317	32637
cg03969070	ENSG00000198106	rs12933229	80638
cg03987003	ENSG00000104714	rs11137016	0
cg03987003	ENSG00000181409	rs11137016	NA
cg03991512	ENSG00000158805	rs1800330	50652
cg03997039	ENSG00000182141	rs1401926	228704
cg04116494	ENSG00000005513	rs6600238	15750
cg04264726	ENSG00000160961	rs10407394	0
cg04264726	ENSG00000127507	rs10407394	39021
cg04279164	ENSG00000004700	rs2417979	30059
cg04287931	ENSG00000175711	rs6502040	2498
cg04330631	ENSG00000104714	rs4243328	NA
cg04377525	ENSG00000129993	rs17177912	865816
cg04404240	ENSG00000105583	rs7256321	237670
cg04423064	ENSG00000180921	rs9650469	21358
cg04474280	ENSG00000080573	rs8112026	0
cg04481722	ENSG00000134265	rs2851956	63758
cg04521224	ENSG00000152582	rs6863096	0
cg04565464	ENSG00000122687	rs10275045	353039
cg04657470	ENSG00000132600	rs2281850	326283
cg04657470	ENSG00000184939	rs2281850	108774
cg04684267	ENSG00000138468	rs2682386	0
cg04808672	ENSG00000172171	rs216443	292482
cg04842962	ENSG00000086062	rs10813950	0
cg04843801	ENSG00000176845	rs6502040	25381
cg04882175	ENSG00000108187	rs731063	0
cg04941127	ENSG00000099821	rs12610384	497
cg04991071	ENSG00000112787	rs7966242	30776
cg04993564	ENSG00000176623	rs6471360	0
cg05039488	ENSG00000111912	rs3799709	23945
cg05039488	ENSG00000066651	rs3799709	229214
cg05051117	ENSG00000134183	rs6663547	31659
cg05072951	ENSG00000160284	rs7281816	2492
cg05171921	ENSG00000177683	rs2190403	0
cg05215424	ENSG00000262089	rs2440129	8062
cg05226967	ENSG00000171421	rs931508	59743
cg05357861	ENSG00000165055	rs2060718	184756
cg05456948	ENSG00000167968	rs8059880	184225
cg05456948	ENSG00000008710	rs8059880	37119
cg05487635	ENSG00000169813	rs2243492	31706
cg05493001	ENSG00000112306	rs12202302	0
cg05541779	ENSG00000171444	rs6866566	0
cg05598678	ENSG00000181666	rs8105305	542831
cg05607577	ENSG00000260804	rs207925	48007
cg05635169	ENSG00000160961	rs10407394	0
cg05724197	ENSG00000123552	rs9402863	1824
cg05744487	ENSG00000260910	rs3895392	120984
cg05746288	ENSG00000172116	rs12621901	16396
cg05756918	ENSG00000160094	rs6664593	12270
cg05756918	ENSG00000261589	rs6664593	NA
cg05790982	ENSG00000169231	rs4971079	34987
cg06016427	ENSG00000198131	rs11671477	11530
cg06185924	ENSG00000150401	rs2261120	1625
cg06270737	ENSG00000177030	rs4963126	0
cg06427514	ENSG00000171045	rs7387733	6116
cg06437144	ENSG00000171421	rs931508	59743
cg06458239	ENSG00000138468	rs9859077	0
cg06471548	ENSG00000184545	rs1554855	76189
cg06520134	ENSG00000196705	rs3867196	309693
cg06529181	ENSG00000108424	rs11079791	96227
cg06615754	ENSG00000138468	rs9859077	0
cg06623486	ENSG00000104714	rs11137016	0
cg06649044	ENSG00000181045	rs7503034	9104
cg06683021	ENSG00000183087	rs7338868	67137
cg06690735	ENSG00000149781	rs1011219	753
cg06700024	ENSG00000182257	rs7289457	6578
cg06757784	ENSG00000187446	rs692153	70355
cg06758644	ENSG00000130844	rs2708742	64891
cg06859187	ENSG00000166377	rs8088317	0
cg06876766	ENSG00000174652	rs7254750	0
cg06889971	ENSG00000197937	rs8101962	18126
cg07018260	ENSG00000165181	rs7042346	104322
cg07029002	ENSG00000174652	rs7254750	0
cg07031794	ENSG00000035115	rs11137016	NA
cg07031794	ENSG00000104714	rs11137016	0
cg07172885	ENSG00000138468	rs9859077	0
cg07222861	ENSG00000000971	rs7542235	106978
cg07237326	ENSG00000138468	rs279205	NA
cg07318453	ENSG00000150401	rs2490955	10385
cg07320140	ENSG00000158805	rs1800330	50652
cg07336754	ENSG00000135047	rs2149380	45859
cg07368265	ENSG00000150401	rs2479753	47617
cg07370464	ENSG00000198106	rs12933229	80638
cg07474852	ENSG00000205670	rs2834485	38849
cg07475247	ENSG00000125818	rs6514115	0
cg07554231	ENSG00000185187	rs10751657	27920
cg07570055	ENSG00000176915	rs3741486	46389
cg07573936	ENSG00000134986	rs341297	515214
cg07589773	ENSG00000134265	rs2851956	63758
cg07594831	ENSG00000204104	rs2334026	227696
cg07608658	ENSG00000176945	rs842225	11753
cg07608658	ENSG00000242086	rs842225	19325
cg07613588	ENSG00000187109	rs7136330	0
cg07654559	ENSG00000212719	rs4021712	41377
cg07683804	ENSG00000099821	rs12610384	497
cg07694975	ENSG00000160961	rs10407394	0
cg07700062	ENSG00000164344	rs7687961	8123
cg07700062	ENSG00000145476	rs7687961	0
cg07741805	ENSG00000198182	rs2972438	155
cg07769176	ENSG00000165548	rs4243654	0
cg07817883	ENSG00000173011	rs6838042	70576
cg07868215	ENSG00000127804	rs7223411	161991
cg07882382	ENSG00000060069	rs673590	0
cg07967114	ENSG00000164346	rs16872346	76992
cg07968857	ENSG00000005513	rs1544799	46090
cg08017606	ENSG00000204839	rs10112966	28792
cg08017606	ENSG00000147813	rs10112966	23114
cg08021797	ENSG00000147813	rs10112966	23114
cg08072402	ENSG00000197020	rs12972593	0
cg08232855	ENSG00000131203	rs4131820	547338
cg08232967	ENSG00000131203	rs4131820	547338
cg08371976	ENSG00000132744	rs7933242	100916
cg08519233	ENSG00000198106	rs12933229	80638
cg08527195	ENSG00000138468	rs2132818	NA
cg08539737	ENSG00000261589	rs17817448	145700
cg08598838	ENSG00000104714	rs7463586	0
cg08612384	ENSG00000115687	rs2108485	23771
cg08639523	ENSG00000177335	rs4607586	42086
cg08668790	ENSG00000138468	rs9859077	0
cg08668790	ENSG00000114770	rs9859077	82501319
cg08690976	ENSG00000197857	rs17001758	144267
cg08706567	ENSG00000214548	rs1004574	67679
cg08823182	ENSG00000189298	rs1936365	49238
cg08837884	ENSG00000184939	rs12925177	0
cg08840551	ENSG00000054793	rs6021372	0
cg08855861	ENSG00000109381	rs12512685	14180
cg08874598	ENSG00000099821	rs12610384	497
cg09032863	ENSG00000085491	rs591141	0
cg09038155	ENSG00000105339	rs3739238	16537
cg09045935	ENSG00000241468	rs11734	165813
cg09107364	ENSG00000164649	rs17163470	NA
cg09212610	ENSG00000150048	rs12370398	138411
cg09212610	ENSG00000134539	rs12370398	0
cg09220050	ENSG00000060069	rs632281	7229
cg09243021	ENSG00000243708	rs1918310	55029
cg09260603	ENSG00000125618	rs2863243	0
cg09275408	ENSG00000109320	rs230531	0
cg09332091	ENSG00000176659	rs242821	5908
cg09480837	ENSG00000138670	rs6535252	0
cg09519134	ENSG00000196867	rs11670421	910
cg09625274	ENSG00000112685	rs2039713	0
cg09723533	ENSG00000060069	rs12605631	0
cg09818588	ENSG00000167968	rs8059880	184225
cg09818588	ENSG00000008710	rs8059880	37119
cg09840623	ENSG00000175866	rs8081382	26840
cg09889350	ENSG00000196867	rs3813143	9440
cg09899215	ENSG00000158805	rs9859077	NA
cg09960435	ENSG00000182307	rs6599566	11997
cg10044101	ENSG00000234284	rs1969025	25560
cg10054641	ENSG00000181666	rs8105305	542831
cg10151737	ENSG00000185187	rs10751657	27920
cg10355989	ENSG00000171421	rs931508	59743
cg10401356	ENSG00000160256	rs4819004	12860
cg10409981	ENSG00000182141	rs2914638	32789
cg10434075	ENSG00000116213	rs4276857	2984
cg10493855	ENSG00000146918	rs3793177	0
cg10493855	ENSG00000126870	rs3793177	208993
cg10493855	ENSG00000117868	rs3793177	83410
cg10495084	ENSG00000113504	rs4975552	0
cg10519680	ENSG00000214087	rs6565620	7145
cg10523494	ENSG00000149089	rs2915199	8121
cg10523494	ENSG00000110435	rs2915199	0
cg10577273	ENSG00000172794	rs508255	66712
cg10596006	ENSG00000160961	rs6511958	0
cg10686758	ENSG00000197857	rs17001758	144267
cg10765909	ENSG00000169925	rs736902	0
cg10899547	ENSG00000204947	rs1724305	31777
cg10962261	ENSG00000140104	rs6576067	0
cg11010178	ENSG00000175711	rs6502040	2498
cg11010178	ENSG00000176845	rs6502040	25381
cg11012543	ENSG00000109320	rs230539	0
cg11143796	ENSG00000198106	rs12933229	80638
cg11152384	ENSG00000109320	rs230520	0
cg11204780	ENSG00000175711	rs12610384	NA
cg11204780	ENSG00000099821	rs12610384	497
cg11204780	ENSG00000099822	rs12610384	16935
cg11254532	ENSG00000197872	rs6742067	45578
cg11275626	ENSG00000146918	rs2075180	391761
cg11294513	ENSG00000138468	rs2141180	0
cg11347411	ENSG00000035115	rs7605824	14420
cg11382417	ENSG00000197020	rs12972593	0
cg11430096	ENSG00000167083	rs671095	27420
cg11430096	ENSG00000173868	rs671095	7228
cg11474778	ENSG00000112584	rs9295394	0
cg11474778	ENSG00000198719	rs9295394	21560
cg11604142	ENSG00000060069	rs898619	0
cg11805559	ENSG00000168297	rs6445960	96674
cg11805559	ENSG00000163686	rs6445960	1300
cg11827101	ENSG00000109320	rs230519	0
cg11839415	ENSG00000214548	rs1004574	67679
cg11911399	ENSG00000165752	rs11146268	0
cg11951449	ENSG00000185619	rs3775140	17872
cg12187687	ENSG00000160094	rs6664593	12270
cg12228919	ENSG00000151353	rs13006698	150769
cg12307638	ENSG00000198105	rs7090858	88080
cg12428160	ENSG00000109320	rs230531	0
cg12442452	ENSG00000162086	rs220376	26887
cg12512271	ENSG00000124831	rs3739038	0
cg12525736	ENSG00000142599	rs10779702	0
cg12564453	ENSG00000196867	rs3813143	9440
cg12569119	ENSG00000160961	rs10401494	0
cg12662084	ENSG00000182986	rs10420793	22341
cg12670123	ENSG00000133597	rs2930328	14491
cg12894917	ENSG00000109536	rs1112139	145758
cg12904880	ENSG00000150401	rs2260163	8940
cg13063040	ENSG00000162066	rs10500324	160388
cg13379408	ENSG00000105982	rs7806832	0
cg13383591	ENSG00000106153	rs2304376	120242
cg13411554	ENSG00000198429	rs260452	46741729
cg13411554	ENSG00000198131	rs260452	0
cg13425960	ENSG00000162086	rs220379	15970
cg13474750	ENSG00000258315	rs17732290	11832
cg13565492	ENSG00000178381	rs9655470	39993
cg13565492	ENSG00000164849	rs9655470	52815
cg13615516	ENSG00000101193	rs2277769	89808
cg13631105	ENSG00000145217	rs11731387	121503
cg13698153	ENSG00000158792	rs164749	54526
cg13698153	ENSG00000131165	rs164749	2614
cg13737042	ENSG00000187045	rs5756505	0
cg13813533	ENSG00000139372	rs10861124	106642
cg13921324	ENSG00000198106	rs12933229	80638
cg13928313	ENSG00000069424	rs7539366	0
cg13948585	ENSG00000188785	rs7250371	40132
cg14116222	ENSG00000185187	rs10751657	27920
cg14189678	ENSG00000175115	rs527897	0
cg14349131	ENSG00000152620	rs10512639	0
cg14367344	ENSG00000163528	rs2607762	0
cg14376988	ENSG00000107341	rs855554	65844
cg14424111	ENSG00000185608	rs2518866	175086
cg14791747	ENSG00000156261	rs1048546	183248
cg14791747	ENSG00000156265	rs1048546	204914
cg14791747	ENSG00000156239	rs1048546	0
cg14806867	ENSG00000183570	rs9977276	73958
cg15043642	ENSG00000198721	rs853416	2875
cg15065854	ENSG00000198521	rs1988038	322065
cg15117681	ENSG00000138468	rs2006748	NA
cg15117681	ENSG00000250312	rs2006748	37272
cg15123187	ENSG00000019102	rs558814	53079
cg15138986	ENSG00000127804	rs1109451	176845
cg15231902	ENSG00000104714	rs11137016	0
cg15439725	ENSG00000138468	rs230500	NA
cg15448366	ENSG00000090612	rs11615248	9032
cg15489005	ENSG00000099821	rs12610384	497
cg15584221	ENSG00000149262	rs7110670	0
cg15600365	ENSG00000006534	rs2075626	3181
cg15624813	ENSG00000198521	rs8106346	341387
cg15681577	ENSG00000197020	rs12972593	0
cg15721666	ENSG00000186480	rs1128636	1114
cg15742412	ENSG00000188785	rs7250371	40132
cg15746696	ENSG00000138468	rs2141180	0
cg15750534	ENSG00000215421	rs12953957	0
cg15882809	ENSG00000071127	rs17198113	19896
cg15934090	ENSG00000101193	rs6089829	92039
cg15993354	ENSG00000074071	rs8049415	37748
cg16011800	ENSG00000064651	rs17764730	61931
cg16072664	ENSG00000176915	rs3741486	46389
cg16187340	ENSG00000138835	rs12338697	0
cg16190211	ENSG00000243708	rs1918310	55029
cg16196077	ENSG00000160072	rs3766180	44924
cg16196077	ENSG00000228594	rs3766180	55238
cg16196077	ENSG00000224870	rs3766180	140726
cg16206836	ENSG00000021762	rs11025639	0
cg16269196	ENSG00000174652	rs1978435	0
cg16383001	ENSG00000198106	rs12933229	80638
cg16471864	ENSG00000145354	rs2711896	221040
cg16510040	ENSG00000198106	rs12933229	80638
cg16540789	ENSG00000158805	rs9859077	NA
cg16634718	ENSG00000122359	rs17098169	94510
cg16658931	ENSG00000180539	rs2049040	24751
cg16658931	ENSG00000235117	rs2049040	34327
cg16660091	ENSG00000196867	rs3813143	9440
cg16660677	ENSG00000124102	rs6017513	30046
cg16660899	ENSG00000170266	rs4234236	18683
cg16920189	ENSG00000106009	rs2304540	17680
cg16983541	ENSG00000109320	rs230531	0
cg17158829	ENSG00000160294	rs2839241	115514
cg17158829	ENSG00000160299	rs2839241	0
cg17171325	ENSG00000140987	rs4786421	71237
cg17171325	ENSG00000122390	rs4786421	0
cg17179875	ENSG00000162600	rs602579	24437
cg17316564	ENSG00000251369	rs2074071	43044
cg17316564	ENSG00000152439	rs2074071	7702
cg17334114	ENSG00000198106	rs252283	98802
cg17383793	ENSG00000160223	rs7278940	0
cg17387870	ENSG00000184939	rs1069288	0
cg17459298	ENSG00000186409	rs12405571	0
cg17468987	ENSG00000185442	rs7494848	0
cg17858911	ENSG00000134265	rs2851956	63758
cg17952111	ENSG00000242086	rs2177336	56455
cg17952111	ENSG00000176945	rs2177336	48883
cg18071532	ENSG00000164776	rs3925031	405225
cg18187862	ENSG00000137713	rs11601674	0
cg18241387	ENSG00000088448	rs1541110	134787
cg18335740	ENSG00000136100	rs9536262	278310
cg18335740	ENSG00000165416	rs9536262	28029
cg18335740	ENSG00000123191	rs9536262	717443
cg18335740	ENSG00000136098	rs9536262	569077
cg18367110	ENSG00000133627	rs10215966	31610
cg18468088	ENSG00000198131	rs11671477	11530
cg18515585	ENSG00000167522	rs2965935	0
cg18634211	ENSG00000180228	rs2114582	8306
cg18634506	ENSG00000261589	rs17817448	145700
cg18637698	ENSG00000256087	rs8104890	15023
cg18638253	ENSG00000160539	rs10901364	7738
cg18645906	ENSG00000104731	rs1599801	0
cg18649979	ENSG00000160539	rs10901364	7738
cg18696576	ENSG00000141013	rs10431948	0
cg18753664	ENSG00000162542	rs1473689	0
cg18888697	ENSG00000124789	rs8070926	NA
cg18888697	ENSG00000198150	rs8070926	7361
cg18912160	ENSG00000151353	rs6754187	119074
cg19148731	ENSG00000122678	rs10234057	301025
cg19148731	ENSG00000106603	rs10234057	41503
cg19267205	ENSG00000130844	rs953751	0
cg19313311	ENSG00000109320	rs1041981	NA
cg19403339	ENSG00000130695	rs2384732	NA
cg19403339	ENSG00000142669	rs2384732	NA
cg19542048	ENSG00000243708	rs1918310	55029
cg19571293	ENSG00000073578	rs7704488	189406
cg19579217	ENSG00000083828	rs4801528	58047
cg19683457	ENSG00000167994	rs1675126	218632
cg19743820	ENSG00000117139	rs3820153	0
cg19787769	ENSG00000157551	rs2000457	0
cg19808620	ENSG00000189298	rs1531681	90812
cg19849509	ENSG00000164849	rs9655470	52815
cg19904905	ENSG00000138468	rs6599306	NA
cg19904905	ENSG00000182903	rs6599306	276164
cg19904905	ENSG00000250312	rs6599306	0
cg19974599	ENSG00000040531	rs4790530	0
cg20075270	ENSG00000158109	rs3818330	8736
cg20075270	ENSG00000116213	rs3818330	0
cg20148285	ENSG00000067606	rs3107146	0
cg20152630	ENSG00000099899	rs2871052	12056
cg20227763	ENSG00000185022	rs5750547	51188
cg20227763	ENSG00000184381	rs5750547	0
cg20238171	ENSG00000184381	rs6001020	0
cg20238171	ENSG00000185022	rs6001020	59642
cg20252443	ENSG00000183570	rs3788216	0
cg20290983	ENSG00000086062	rs7865745	0
cg20325293	ENSG00000104714	rs4735900	0
cg20361427	ENSG00000205060	rs17773014	92009
cg20390253	ENSG00000176845	rs7406067	49954
cg20409636	ENSG00000124224	rs6026278	142154
cg20409636	ENSG00000124164	rs6026278	492
cg20486551	ENSG00000198521	rs8106346	341387
cg20512924	ENSG00000155636	rs13402629	153743
cg20553394	ENSG00000152804	rs7914814	64994
cg20553394	ENSG00000138160	rs7914814	0
cg20595215	ENSG00000243708	rs1918310	55029
cg20822818	ENSG00000127419	rs4690336	58932
cg20822818	ENSG00000127415	rs4690336	113542
cg20822818	ENSG00000145217	rs4690336	105618
cg20884098	ENSG00000110172	rs2187318	61641
cg20909645	ENSG00000182141	rs2914638	32789
cg21156815	ENSG00000122687	rs4721135	361643
cg21167628	ENSG00000126870	rs2730249	18189
cg21249729	ENSG00000145217	rs4690336	105618
cg21279996	ENSG00000214548	rs12888043	75310
cg21284400	ENSG00000178381	rs9801444	111262
cg21302420	ENSG00000158805	rs2238527	33396
cg21302420	ENSG00000258839	rs2238527	137818
cg21317088	ENSG00000047578	rs772958	63948
cg21384718	ENSG00000178381	rs2949192	3445
cg21537297	ENSG00000170667	rs2214924	914590
cg21629895	ENSG00000221926	rs3760299	23869
cg21634218	ENSG00000162086	rs17136317	0
cg21653878	ENSG00000104714	rs3735915	0
cg21806580	ENSG00000177311	rs724016	0
cg22037779	ENSG00000198131	rs2289143	115899
cg22037779	ENSG00000249471	rs2289143	58255
cg22094845	ENSG00000198105	rs200910	0
cg22109262	ENSG00000104731	rs12447906	0
cg22199969	ENSG00000198105	rs7090858	88080
cg22231329	ENSG00000060069	rs7245376	0
cg22324358	ENSG00000035115	rs7573495	10543
cg22388607	ENSG00000127804	rs7223411	161991
cg22475576	ENSG00000008710	rs2516737	36961
cg22510337	ENSG00000138468	rs2553419	0
cg22654137	ENSG00000126870	rs2730237	0
cg22664798	ENSG00000189298	rs6907950	33298
cg22691505	ENSG00000060069	rs3933772	0
cg22705835	ENSG00000248508	rs749749	0
cg22705835	ENSG00000128829	rs749749	22333
cg22792862	ENSG00000164776	rs2634082	518305
cg22793860	ENSG00000127804	rs7223411	161991
cg22825631	ENSG00000164849	rs2397	79688
cg22825631	ENSG00000146540	rs2397	32098
cg22842510	ENSG00000175221	rs1683565	0
cg22865050	ENSG00000185418	rs10444899	0
cg22876092	ENSG00000250312	rs10001263	49877
cg22994198	ENSG00000184939	rs11648314	0
cg23020402	ENSG00000163013	rs2421663	347270
cg23048494	ENSG00000196172	rs404822	1706029
cg23062006	ENSG00000185187	rs10751657	27920
cg23068772	ENSG00000102554	rs7995153	19054
cg23068772	ENSG00000074800	rs7995153	NA
cg23238134	ENSG00000198105	rs7090858	88080
cg23275840	ENSG00000168827	rs827113	382362
cg23313885	ENSG00000181666	rs8105305	542831
cg23325670	ENSG00000260910	rs7998148	150414
cg23360388	ENSG00000198131	rs260473	9321
cg23401684	ENSG00000197020	rs12972593	0
cg23483530	ENSG00000181409	rs4969259	0
cg23483530	ENSG00000175866	rs4969259	27369
cg23488616	ENSG00000180921	rs9650469	21358
cg23505145	ENSG00000101193	rs2277769	89808
cg23533926	ENSG00000198105	rs1740752	391736
cg23597162	ENSG00000181666	rs10417204	174454
cg23597162	ENSG00000198182	rs10417204	152541
cg23818921	ENSG00000125863	rs221668	0
cg23841819	ENSG00000166821	rs10775247	94873
cg23853861	ENSG00000083828	rs4801528	58047
cg23890506	ENSG00000104731	rs12447906	0
cg24069048	ENSG00000242086	rs842225	19325
cg24077454	ENSG00000104714	rs4735825	159037
cg24089360	ENSG00000163755	rs10513348	91509
cg24089360	ENSG00000163754	rs10513348	10441
cg24125648	ENSG00000111897	rs561470	11144
cg24200083	ENSG00000232098	rs7249714	138231
cg24214260	ENSG00000138468	rs2682386	0
cg24321774	ENSG00000166347	rs7239151	0
cg24350395	ENSG00000269893	rs3879803	215460
cg24350395	ENSG00000145388	rs3879803	190083
cg24358846	ENSG00000182141	rs2914638	32789
cg24362661	ENSG00000135503	rs706819	29527
cg24429836	ENSG00000158805	rs9859077	NA
cg24451422	ENSG00000060069	rs2279103	0
cg24475146	ENSG00000035115	rs6710091	0
cg24623068	ENSG00000157978	rs3924486	0
cg24630195	ENSG00000173272	rs3730148	40313
cg24638253	ENSG00000197020	rs12972593	0
cg24639504	ENSG00000104714	rs11137016	0
cg24644049	ENSG00000158792	rs2238527	72594
cg24644049	ENSG00000258839	rs2238527	137818
cg24644049	ENSG00000158805	rs2238527	33396
cg24694675	ENSG00000122687	rs4719443	112766
cg24718827	ENSG00000174652	rs6512121	0
cg25147447	ENSG00000196867	rs11670421	910
cg25220460	ENSG00000104714	rs1669681	0
cg25301142	ENSG00000141034	rs854790	56599
cg25400396	ENSG00000138468	rs9859077	0
cg25533993	ENSG00000162086	rs220379	15970
cg25620548	ENSG00000142347	rs2967578	7805
cg25680245	ENSG00000104714	rs11137016	0
cg25749165	ENSG00000104731	rs1599801	0
cg25804018	ENSG00000143870	rs10520049	0
cg25835954	ENSG00000178297	rs12610522	0
cg25835954	ENSG00000099860	rs12610522	62891
cg25843003	ENSG00000140853	rs16965220	0
cg25914270	ENSG00000117139	rs3820153	0
cg25937451	ENSG00000184517	rs12935567	0
cg25961221	ENSG00000166689	rs7105832	452670
cg26043149	ENSG00000071127	rs17198113	19896
cg26114043	ENSG00000003249	rs9928084	19189
cg26114043	ENSG00000141013	rs9928084	0
cg26181818	ENSG00000198105	rs200910	0
cg26257814	ENSG00000162086	rs17136317	0
cg26278703	ENSG00000171044	rs10503410	101202
cg26395761	ENSG00000258701	rs8010024	12134
cg26465391	ENSG00000114770	rs2682386	82568848
cg26465391	ENSG00000138468	rs2682386	0
cg26518628	ENSG00000269893	rs17642498	116257
cg26518628	ENSG00000145388	rs17642498	289286
cg26607758	ENSG00000100429	rs4838865	18999
cg26681183	ENSG00000269996	rs11249429	156498
cg26709343	ENSG00000138246	rs3762672	0
cg26747301	ENSG00000185527	rs9906358	3007
cg26816583	ENSG00000165752	rs2474334	11687
cg26816583	ENSG00000171813	rs2474334	53632
cg26826117	ENSG00000259363	rs8039703	0
cg26829322	ENSG00000260910	rs7998148	150414
cg26860703	ENSG00000187726	rs1723834	148715
cg26860994	ENSG00000176915	rs4883520	186848
cg26883884	ENSG00000185015	rs9987281	152527
cg26883884	ENSG00000104267	rs9987281	27250
cg26973714	ENSG00000081760	rs11058026	0
cg26981978	ENSG00000160961	rs10407394	0
cg27049766	ENSG00000114770	rs2141180	82458664
cg27049766	ENSG00000138468	rs2141180	0
cg27101157	ENSG00000141574	rs7207095	47778
cg27112264	ENSG00000138468	rs2141180	0
cg27137576	ENSG00000072274	rs4916519	137106
cg27137576	ENSG00000163959	rs4916519	0
cg27159719	ENSG00000181666	rs8105305	542831
cg27178407	ENSG00000178297	rs12610522	0
cg27178407	ENSG00000099860	rs12610522	62891
cg27317242	ENSG00000176623	rs6471360	0
cg27324426	ENSG00000114770	rs2682386	82568848
cg27324426	ENSG00000138468	rs2682386	0
cg27409113	ENSG00000149531	rs1018405	255757
cg27474149	ENSG00000151093	rs1387211	68980
cg27539482	ENSG00000143799	rs1136410	0
