# Supplementary material for: Genome-wide identification of genes regulating DNA methylation using genetic anchors for causal inference
Source: Genome Biol. 2020 Aug 28;21:220. doi: 10.1186/s13059-020-02114-z (PMC7453518; doi:10.1186/s13059-020-02114-z)
Supplement: Supplementary file 8 — Additional file 8: Table S8. Target CpGs that overlap with trans-meQTL CpGs identified by Gaunt et al. [file 13059_2020_2114_MOESM8_ESM.csv]

CpG	GI	meQTL_SNP	Distance_GI_SNP
cg00026974	ENSG00000150401	rs9324248	75509
cg00130528	ENSG00000198189	rs55764266	16527
cg00152757	ENSG00000169762	rs35899968	0
cg00597087	ENSG00000141101	rs3748386	185815
cg00597087	ENSG00000090857	rs3748386	172869
cg00618725	ENSG00000128185	rs2292954	NA
cg00646200	ENSG00000269996	rs146374982	206891
cg00710870	ENSG00000107968	rs302420	17740
cg00774769	ENSG00000174695	rs10473867	63749
cg00999644	ENSG00000162367	rs7543016	101746
cg00999644	ENSG00000162368	rs7543016	0
cg01027929	ENSG00000128891	rs4080706	22028
cg01105557	ENSG00000257103	rs11880170	44793
cg01134436	ENSG00000186235	rs72987327	219514
cg01286935	ENSG00000183087	rs7981577	268755
cg01286935	ENSG00000260910	rs7981577	203984
cg01370599	ENSG00000156973	rs12415	23842
cg01370599	ENSG00000144524	rs12415	73088
cg01405143	ENSG00000204104	rs6431616	230737
cg01441593	ENSG00000149260	rs61899964	0
cg01461718	ENSG00000160961	rs4808304	0
cg01461718	ENSG00000160961	rs10407394	0
cg01509141	ENSG00000171421	rs6886669	66349
cg01577292	ENSG00000104731	rs62053822	25616
cg01594514	ENSG00000260910	rs6560952	152111
cg01621268	ENSG00000229809	rs113711981	8570
cg01624645	ENSG00000198106	rs871886	0
cg01706698	ENSG00000196867	rs12151254	26922
cg01706698	ENSG00000018869	rs12151254	118479
cg01710146	ENSG00000130598	rs7394773	45128
cg01717063	ENSG00000168411	rs9931225	0
cg01718231	ENSG00000152242	rs9952972	0
cg01809281	ENSG00000006715	rs57048480	22982
cg01833234	ENSG00000188227	rs34603719	203312
cg01838916	ENSG00000085491	rs11185305	20432
cg01882498	ENSG00000177873	rs7645733	4081
cg01970784	ENSG00000158669	rs11996670	0
cg01978534	ENSG00000160961	rs4808304	0
cg01978534	ENSG00000160961	rs10407394	0
cg02058194	ENSG00000068024	rs199686476	0
cg02128325	ENSG00000171045	rs200256748	0
cg02143877	ENSG00000099814	rs72700197	0
cg02143877	ENSG00000140104	rs72700197	94340
cg02178058	ENSG00000110583	rs10792423	53358
cg02178058	ENSG00000176485	rs10792423	268716
cg02178058	ENSG00000184743	rs10792423	213678
cg02201215	ENSG00000198106	rs58005809	10358
cg02477834	ENSG00000131042	rs12986034	21965
cg02477834	ENSG00000239961	rs12986034	88746
cg02491787	ENSG00000178700	rs4857446	430956
cg02560186	ENSG00000114520	rs201561640	256785
cg02613435	ENSG00000142347	rs2967591	0
cg02624129	ENSG00000121390	rs13378540	779154
cg02637438	ENSG00000164877	rs28615604	10568
cg02652978	ENSG00000198106	rs146507007	0
cg02720013	ENSG00000124789	rs9358131	61255
cg02720013	ENSG00000124789	rs28662192	NA
cg02720013	ENSG00000161905	rs9358131	NA
cg02720013	ENSG00000161905	rs28662192	58907
cg02734259	ENSG00000013573	rs11608851	19503
cg02775382	ENSG00000091592	rs8068576	149584
cg02800362	ENSG00000166377	rs7241419	188506
cg02809009	ENSG00000082701	rs813698	212263
cg02914427	ENSG00000110455	rs4418801	10759
cg02972559	ENSG00000148655	rs2395138	509871
cg02972559	ENSG00000165637	rs2395138	118785
cg03156396	ENSG00000146918	rs2290393	0
cg03156396	ENSG00000117868	rs2290393	85499
cg03156396	ENSG00000126870	rs2290393	211082
cg03195269	ENSG00000005513	rs9328933	44287
cg03232842	ENSG00000196867	rs16987303	13213
cg03232842	ENSG00000018869	rs16987303	132188
cg03234186	ENSG00000138468	rs12491955	0
cg03234186	ENSG00000114770	rs12491955	82491124
cg03269218	ENSG00000148110	rs59871876	76841
cg03492460	ENSG00000172037	rs11914795	1600824
cg03520265	ENSG00000177030	rs202091261	0
cg03553358	ENSG00000137265	rs9378808	9869
cg03574360	ENSG00000011590	rs73590561	0
cg03681834	ENSG00000197020	rs6511291	0
cg03688818	ENSG00000160961	rs10411315	0
cg03720617	ENSG00000250312	rs11732336	0
cg03720617	ENSG00000182903	rs11732336	279091
cg03746136	ENSG00000142528	rs35055749	90117
cg03782202	ENSG00000087460	rs117547698	38668
cg03863721	ENSG00000181666	rs35203277	0
cg03944143	ENSG00000197302	rs34148591	59687
cg03958163	ENSG00000158792	rs258323	8056
cg03958163	ENSG00000131165	rs258323	30440
cg03969070	ENSG00000198106	rs11150712	19781
cg03975235	ENSG00000171045	rs143645282	0
cg03987003	ENSG00000104714	rs906187	NA
cg03987003	ENSG00000181409	rs906187	0
cg03997039	ENSG00000182141	rs12974329	188172
cg04118234	ENSG00000005513	rs6600238	15750
cg04264726	ENSG00000160961	rs3915404	0
cg04264726	ENSG00000160961	rs3850141	0
cg04264726	ENSG00000127507	rs3915404	37685
cg04264726	ENSG00000127507	rs3850141	37485
cg04279164	ENSG00000004700	rs2058463	31287
cg04377525	ENSG00000129993	rs72815572	23518
cg04423064	ENSG00000180921	rs12541792	36907
cg04481584	ENSG00000242086	rs1666176	272142
cg04521224	ENSG00000152582	rs200454048	0
cg04565464	ENSG00000122687	rs10950456	294115
cg04657470	ENSG00000132600	rs199940396	330991
cg04657470	ENSG00000184939	rs199940396	113482
cg04701034	ENSG00000113504	rs202173870	0
cg04780572	ENSG00000160949	rs13275522	10443
cg04808672	ENSG00000172171	rs113433528	258691
cg04842962	ENSG00000086062	rs10813948	0
cg04882175	ENSG00000108187	rs1807347	0
cg04951804	ENSG00000109046	rs35852868	35855
cg04967530	ENSG00000221926	rs62072384	65880
cg04991071	ENSG00000112787	rs7975023	668
cg04991071	ENSG00000112787	rs57470468	2809
cg04993564	ENSG00000176623	rs56810922	0
cg05000488	ENSG00000178295	rs12474069	7849
cg05039488	ENSG00000111912	rs2875881	29453
cg05039488	ENSG00000066651	rs2875881	234722
cg05051117	ENSG00000134183	rs11312348	0
cg05072951	ENSG00000160284	rs62215189	0
cg05171921	ENSG00000177683	rs28667688	12438
cg05197062	ENSG00000198521	rs146375295	306104
cg05225581	ENSG00000088448	rs7331404	114
cg05226967	ENSG00000171421	rs6886669	66349
cg05233863	ENSG00000148600	rs36018536	316694
cg05269678	ENSG00000175265	rs7495444	16517
cg05324519	ENSG00000225190	rs114637280	25297
cg05357861	ENSG00000165055	rs62483370	197357
cg05456948	ENSG00000167968	rs12918803	143463
cg05456948	ENSG00000008710	rs12918803	0
cg05461259	ENSG00000104714	rs336439	0
cg05487635	ENSG00000169813	rs61859972	79153
cg05559398	ENSG00000107341	rs3954946	150223
cg05607577	ENSG00000260804	rs668844	60165
cg05724197	ENSG00000123552	rs9402863	1824
cg05790982	ENSG00000169231	rs760077	0
cg05807023	ENSG00000140988	rs55949541	1574
cg05840127	ENSG00000013573	rs670945	147544
cg05984533	ENSG00000196526	rs17382379	2401
cg05998672	ENSG00000215912	rs2258734	83453
cg06023570	ENSG00000182986	rs7256165	15776
cg06263740	ENSG00000124370	rs888352	39756
cg06270737	ENSG00000177030	rs5789195	0
cg06370057	ENSG00000233013	rs2739258	95995
cg06427514	ENSG00000171045	rs11337106	4512
cg06437144	ENSG00000171421	rs6886669	66349
cg06457011	ENSG00000198105	rs1735577	72975
cg06471548	ENSG00000184545	rs11031263	44008
cg06520134	ENSG00000196705	rs2358606	351098
cg06615754	ENSG00000138468	rs62280667	0
cg06683021	ENSG00000183087	rs34346529	281456
cg06757784	ENSG00000187446	rs28629856	76086
cg06758644	ENSG00000130844	rs2708738	62245
cg06774039	ENSG00000167522	rs12920325	0
cg06786064	ENSG00000006534	rs61892919	36720
cg06787302	ENSG00000172171	rs199936233	74227
cg06853376	ENSG00000182511	rs2677737	2200
cg06859187	ENSG00000166377	rs13381810	0
cg06952873	ENSG00000162086	rs12325187	0
cg06952873	ENSG00000103313	rs12325187	58369
cg07325233	ENSG00000185187	rs10794318	1835
cg07368265	ENSG00000150401	rs35387932	43836
cg07387335	ENSG00000039123	rs334880	83149
cg07466433	ENSG00000159131	rs17646111	38984
cg07474852	ENSG00000205670	rs2834485	38849
cg07554231	ENSG00000185187	rs7945319	518
cg07570055	ENSG00000176915	rs77055232	21439
cg07613588	ENSG00000187109	rs11180823	0
cg07721440	ENSG00000013573	rs67241714	0
cg07797397	ENSG00000141568	rs7216678	175890
cg07797397	ENSG00000141574	rs7216678	9747
cg07817883	ENSG00000173011	rs59809420	73697
cg07817883	ENSG00000173011	rs4689573	30233
cg07968857	ENSG00000005513	rs3803698	4827
cg08017606	ENSG00000204839	rs9657360	21720
cg08017606	ENSG00000147813	rs9657360	16042
cg08072402	ENSG00000197020	rs6511291	0
cg08081379	ENSG00000197816	rs3747502	0
cg08118649	ENSG00000158717	rs745326	7657
cg08118649	ENSG00000174177	rs745326	17625
cg08191566	ENSG00000081665	rs12052168	14076
cg08232855	ENSG00000131203	rs10086289	321492
cg08280368	ENSG00000167384	rs1434579	46881
cg08371976	ENSG00000132744	rs3888898	64631
cg08484962	ENSG00000231412	rs6996294	NA
cg08548044	ENSG00000140988	rs113892113	0
cg08668790	ENSG00000138468	rs12491955	0
cg08668790	ENSG00000114770	rs12491955	82491124
cg08926056	ENSG00000260257	rs6579061	148951
cg09045935	ENSG00000241468	rs114658645	28360
cg09156207	ENSG00000162086	rs7201158	17953
cg09156207	ENSG00000103313	rs7201158	30824
cg09165441	ENSG00000179242	rs7274810	8251
cg09212610	ENSG00000150048	rs11545794	101443
cg09212610	ENSG00000134539	rs11545794	12986
cg09220050	ENSG00000060069	rs11081558	0
cg09332091	ENSG00000176659	rs768452	7646
cg09373786	ENSG00000196683	rs56265532	32752
cg09480837	ENSG00000138670	rs13118211	0
cg09509221	ENSG00000099817	rs11670128	1696
cg09723533	ENSG00000060069	rs3859321	0
cg09818588	ENSG00000167968	rs77872317	110009
cg09818588	ENSG00000008710	rs77872317	0
cg09836344	ENSG00000169925	rs441233	19405
cg09836344	ENSG00000169925	rs6479633	12403
cg09840623	ENSG00000175866	rs4969380	0
cg09860653	ENSG00000128165	rs9306550	43907
cg09941712	ENSG00000213020	rs12978447	78253
cg09960435	ENSG00000182307	rs6599566	11997
cg10052190	ENSG00000196526	rs62290609	11544
cg10054641	ENSG00000181666	rs113787224	351745
cg10116893	ENSG00000167637	rs6509119	1895
cg10151737	ENSG00000185187	rs76360685	2669
cg10151737	ENSG00000185187	rs35828848	2170
cg10162696	ENSG00000101444	rs6088294	527870
cg10208301	ENSG00000188227	rs3745765	143605
cg10355989	ENSG00000171421	rs59806149	72467
cg10401356	ENSG00000160256	rs28711509	14436
cg10409981	ENSG00000182141	rs8111549	92231
cg10443068	ENSG00000111846	rs35183083	335
cg10493855	ENSG00000146918	rs877279	0
cg10493855	ENSG00000126870	rs877279	218361
cg10493855	ENSG00000117868	rs877279	92778
cg10519680	ENSG00000214087	rs78672109	40830
cg10523494	ENSG00000149089	rs2915226	0
cg10523494	ENSG00000110435	rs2915226	35012
cg10596006	ENSG00000160961	rs10407394	0
cg10596006	ENSG00000160961	rs3850141	0
cg10612452	ENSG00000167637	rs6509119	1895
cg10705386	ENSG00000261218	rs4889373	24250
cg10765909	ENSG00000169925	rs443876	0
cg10962261	ENSG00000140104	rs12232105	29429
cg11010178	ENSG00000175711	rs55930010	19312
cg11010178	ENSG00000176845	rs55930010	8567
cg11083276	ENSG00000151353	rs2974256	132291
cg11143796	ENSG00000198106	rs58005809	10358
cg11155082	ENSG00000166987	rs10437954	79990
cg11214140	ENSG00000065000	rs77347571	0
cg11254532	ENSG00000197872	rs70961458	41214
cg11275626	ENSG00000146918	rs78957168	306180
cg11294513	ENSG00000138468	rs13062095	35299
cg11335411	ENSG00000138468	rs13062095	35299
cg11347411	ENSG00000035115	rs75141812	23604
cg11382417	ENSG00000197020	rs201944253	2
cg11404039	ENSG00000187017	rs75508567	0
cg11430096	ENSG00000167083	rs9889994	13331
cg11430096	ENSG00000173868	rs9889994	0
cg11450744	ENSG00000225190	rs117692492	1094442
cg11586158	ENSG00000148396	rs11145861	46172
cg11586158	ENSG00000148384	rs11145861	34694
cg11586158	ENSG00000187796	rs11145861	20242
cg11805559	ENSG00000168297	rs1399754	99189
cg11805559	ENSG00000163686	rs1399754	3815
cg11829072	ENSG00000164821	rs2978898	100965
cg11911399	ENSG00000165752	rs4880363	0
cg11951449	ENSG00000185619	rs73222831	8267
cg11995313	ENSG00000109046	rs12938034	3741926
cg12152193	ENSG00000225331	rs756555	39840
cg12228919	ENSG00000151353	rs12993438	156990
cg12228919	ENSG00000151353	rs12465676	156359
cg12284736	ENSG00000125629	rs79698754	281155
cg12361987	ENSG00000188171	rs142963681	148950
cg12403253	ENSG00000164024	rs10002449	0
cg12428160	ENSG00000109320	rs200367022	0
cg12442452	ENSG00000162086	rs224241	38369
cg12496411	ENSG00000068383	rs2492769	0
cg12564453	ENSG00000196867	rs16987303	13213
cg12569119	ENSG00000160961	rs3850140	0
cg12662084	ENSG00000182986	rs6509695	27805
cg12850695	ENSG00000100321	rs1003643	69435
cg12894917	ENSG00000109536	rs13141981	135699
cg12902497	ENSG00000111669	rs11064444	13776
cg13039545	ENSG00000137135	rs12376740	19276
cg13063040	ENSG00000162066	rs3094471	171756
cg13067095	ENSG00000178980	rs11083892	25400
cg13179056	ENSG00000189298	rs116358919	418702
cg13244312	ENSG00000167384	rs1062093	47858
cg13565492	ENSG00000178381	rs112460491	22604
cg13565492	ENSG00000164849	rs112460491	70204
cg13615516	ENSG00000101193	rs6089827	91848
cg13698153	ENSG00000158792	rs464873	12078
cg13698153	ENSG00000131165	rs464873	26418
cg13737042	ENSG00000187045	rs5756506	0
cg13745513	ENSG00000167202	rs12592276	65229
cg13874654	ENSG00000167637	rs16976835	0
cg13881513	ENSG00000128891	rs11855923	35344
cg13912834	ENSG00000100425	rs7293089	102950
cg13928313	ENSG00000069424	rs531099	0
cg14011486	ENSG00000180228	rs2288322	6877
cg14014890	ENSG00000160223	rs72326665	10437
cg14108711	ENSG00000073350	rs1671031	0
cg14208672	ENSG00000196867	rs16987303	13213
cg14376988	ENSG00000107341	rs10814044	50293
cg14424111	ENSG00000185608	rs712962	262716
cg14461570	ENSG00000131196	rs306871	0
cg14565914	ENSG00000128891	rs11632061	0
cg14748380	ENSG00000261589	rs1548908	78731
cg14791747	ENSG00000156261	rs2738967	167744
cg14791747	ENSG00000156261	rs2776210	159567
cg14791747	ENSG00000156265	rs2738967	189410
cg14791747	ENSG00000156265	rs2776210	181233
cg14791747	ENSG00000156239	rs2738967	2687
cg14791747	ENSG00000156239	rs2776210	10864
cg14889079	ENSG00000162711	rs11577509	0
cg14916079	ENSG00000198521	rs382357	308579
cg15138986	ENSG00000127804	rs112230104	142477
cg15231902	ENSG00000104714	rs34140873	0
cg15233961	ENSG00000148110	rs55995901	14393
cg15457005	ENSG00000127415	rs2306244	118282
cg15457005	ENSG00000127415	rs899388	103513
cg15457005	ENSG00000127419	rs2306244	63672
cg15457005	ENSG00000127419	rs899388	48903
cg15457005	ENSG00000145217	rs2306244	110358
cg15457005	ENSG00000145217	rs899388	95589
cg15483228	ENSG00000165006	rs855436	476663
cg15483228	ENSG00000107341	rs855436	115225
cg15489005	ENSG00000099821	rs10419855	0
cg15600365	ENSG00000006534	rs72940176	7823
cg15624813	ENSG00000198521	rs414385	303649
cg15681577	ENSG00000197020	rs6511291	0
cg15721666	ENSG00000186480	rs143254203	9004
cg15746696	ENSG00000138468	rs10936642	0
cg15812469	ENSG00000055483	rs62074531	133570
cg15843217	ENSG00000198521	rs200918500	173162
cg15882809	ENSG00000071127	rs17198113	19896
cg15883249	ENSG00000013573	rs670945	147544
cg15883853	ENSG00000171817	rs2016598	36759
cg15883853	ENSG00000181666	rs2016598	281490
cg15883853	ENSG00000188227	rs2016598	102093
cg15934090	ENSG00000101193	rs201235213	93592
cg15993354	ENSG00000074071	rs8056771	21245
cg16011800	ENSG00000064651	rs9327468	0
cg16021909	ENSG00000204104	rs57859574	219476
cg16196077	ENSG00000160072	rs3766179	44944
cg16196077	ENSG00000228594	rs3766179	55218
cg16196077	ENSG00000224870	rs3766179	140746
cg16206836	ENSG00000021762	rs34820287	0
cg16248798	ENSG00000006007	rs11860373	99973
cg16269196	ENSG00000174652	rs113421203	0
cg16319085	ENSG00000184182	rs62197368	82145
cg16383001	ENSG00000198106	rs71387652	15168
cg16471864	ENSG00000145354	rs2276975	309187
cg16506114	ENSG00000197857	rs7254564	166320
cg16658931	ENSG00000180539	rs7388671	25917
cg16658931	ENSG00000235117	rs7388671	35493
cg16660091	ENSG00000196867	rs16987303	13213
cg16660899	ENSG00000170266	rs4547648	0
cg16733866	ENSG00000197077	rs55780009	0
cg17074339	ENSG00000198521	rs146375295	306104
cg17158829	ENSG00000160294	rs1007893	171382
cg17158829	ENSG00000160299	rs1007893	11911
cg17171325	ENSG00000140987	rs9932315	89207
cg17171325	ENSG00000122390	rs9932315	3309
cg17179875	ENSG00000162600	rs3990926	25984
cg17334114	ENSG00000198106	rs2370277	1654
cg17383793	ENSG00000160223	rs3746963	0
cg17470723	ENSG00000101193	rs10854168	92553
cg17566920	ENSG00000198799	rs9970307	209722
cg17566920	ENSG00000198799	rs6746614	NA
cg17858911	ENSG00000134265	rs564499	13822
cg17858911	ENSG00000134265	rs4289062	1576635
cg17878506	ENSG00000104731	rs62053822	25616
cg17952111	ENSG00000242086	rs2688525	24808
cg17952111	ENSG00000176945	rs2688525	17236
cg18071532	ENSG00000164776	rs10239401	377619
cg18187862	ENSG00000137713	rs2850247	50
cg18317694	ENSG00000105568	rs55910520	68125
cg18335740	ENSG00000136100	rs61958133	156739
cg18335740	ENSG00000165416	rs61958133	45340
cg18335740	ENSG00000123191	rs61958133	595872
cg18335740	ENSG00000136098	rs61958133	447506
cg18367110	ENSG00000133627	rs7804896	7124
cg18430411	ENSG00000143226	rs11265585	206062
cg18515585	ENSG00000167522	rs3096325	0
cg18558237	ENSG00000198964	rs75905221	22685
cg18634211	ENSG00000180228	rs2288322	6877
cg18638253	ENSG00000160539	rs112840483	12437
cg18724061	ENSG00000160208	rs4819219	94564
cg18753664	ENSG00000162542	rs35080007	0
cg18756771	ENSG00000162542	rs2294635	0
cg18834416	ENSG00000184674	esv2669470	33082
cg18896967	ENSG00000107341	rs3954946	150223
cg19219834	ENSG00000162711	rs11577509	0
cg19509715	ENSG00000232677	rs7255170	45237
cg19571293	ENSG00000073578	rs2102388	198110
cg19579217	ENSG00000083828	rs35805032	17262
cg19597498	ENSG00000197857	rs7254564	166320
cg19694781	ENSG00000006125	rs72829936	6678
cg19743820	ENSG00000117139	rs16850357	1106
cg19743820	ENSG00000117139	rs3196669	0
cg19805863	ENSG00000132394	rs35277207	0
cg19974599	ENSG00000040531	rs11656829	0
cg20027314	ENSG00000109536	rs11731413	139908
cg20075270	ENSG00000158109	rs12046309	15228
cg20075270	ENSG00000116213	rs12046309	0
cg20148285	ENSG00000067606	rs3107154	0
cg20152630	ENSG00000099899	rs202094929	3090
cg20152630	ENSG00000099899	rs10586549	32531
cg20238171	ENSG00000184381	rs9622726	813
cg20238171	ENSG00000185022	rs9622726	91200
cg20290983	ENSG00000086062	rs10813948	0
cg20307021	ENSG00000186716	rs67850654	39385
cg20325293	ENSG00000104714	rs28393818	0
cg20361427	ENSG00000205060	rs782052	115606
cg20390253	ENSG00000176845	rs4986105	9596
cg20963267	ENSG00000106780	rs10760116	17932
cg20963267	ENSG00000095261	rs10760116	83092
cg20990478	ENSG00000242086	rs7627446	16984
cg20990478	ENSG00000176945	rs7627446	9412
cg21167628	ENSG00000126870	rs2730249	18189
cg21188533	ENSG00000198429	rs62114176	46751338
cg21188533	ENSG00000198131	rs62114176	0
cg21196724	ENSG00000177225	rs10736901	29250
cg21249729	ENSG00000145217	rs6843423	125852
cg21284400	ENSG00000178381	rs2363279	95563
cg21302420	ENSG00000158805	rs78703231	115173
cg21302420	ENSG00000258839	rs78703231	56041
cg21317088	ENSG00000047578	rs772958	63948
cg21384718	ENSG00000178381	rs2960850	11253
cg21537297	ENSG00000170667	rs2382688	946179
cg21653878	ENSG00000104714	rs28393818	0
cg21794419	ENSG00000184939	rs1170439	0
cg21932400	ENSG00000161653	rs231453	80025
cg21932400	ENSG00000108852	rs231453	14819
cg22037779	ENSG00000198131	rs2305119	278807
cg22037779	ENSG00000249471	rs2305119	98422
cg22076228	ENSG00000158483	rs7941039	0
cg22159557	ENSG00000131187	rs7447593	5003
cg22231329	ENSG00000060069	rs571096	0
cg22318509	ENSG00000111885	rs11153803	0
cg22322277	ENSG00000109320	rs230501	0
cg22388607	ENSG00000127804	rs142960107	116189
cg22459320	ENSG00000172171	rs216404	315122
cg22475576	ENSG00000008710	rs28668625	0
cg22582617	ENSG00000175322	rs7229526	0
cg22705835	ENSG00000248508	rs2412474	0
cg22705835	ENSG00000128829	rs2412474	5993
cg22792862	ENSG00000164776	rs11764928	253716
cg22793860	ENSG00000127804	rs142960107	116189
cg22825631	ENSG00000164849	rs871172	74567
cg22825631	ENSG00000146540	rs871172	26977
cg22844232	ENSG00000148824	rs145673810	0
cg22866565	ENSG00000181666	rs2199644	169735
cg22866565	ENSG00000181666	rs11666245	369658
cg22866565	ENSG00000198182	rs2199644	157260
cg22866565	ENSG00000198182	rs11666245	19234
cg22924550	ENSG00000109501	rs12642481	0
cg23275840	ENSG00000168827	rs34546279	391231
cg23401684	ENSG00000197020	rs12972593	0
cg23488616	ENSG00000180921	rs1137806	0
cg23505145	ENSG00000101193	rs910942	80031
cg24008668	ENSG00000160208	rs8131020	98365
cg24041822	ENSG00000112584	rs112187434	27465
cg24077454	ENSG00000104714	rs13279280	162164
cg24089360	ENSG00000163755	rs35839013	95220
cg24089360	ENSG00000163754	rs35839013	6730
cg24321774	ENSG00000166347	rs3829639	0
cg24350395	ENSG00000269893	rs2728274	270433
cg24350395	ENSG00000145388	rs2728274	135110
cg24358846	ENSG00000182141	rs8112059	2241
cg24436365	ENSG00000135047	rs4877382	130827
cg24460126	ENSG00000261589	rs8069999	87691
cg24623068	ENSG00000157978	rs3924236	28
cg24630195	ENSG00000173272	rs113036104	21488
cg24637308	ENSG00000188227	rs4802136	148029
cg24638253	ENSG00000197020	rs6511291	0
cg24639504	ENSG00000104714	rs58004422	0
cg24644049	ENSG00000158792	rs78703231	154371
cg24644049	ENSG00000258839	rs78703231	56041
cg24644049	ENSG00000158805	rs78703231	115173
cg24694675	ENSG00000122687	rs12668848	252870
cg24748945	ENSG00000158457	rs113450807	40078
cg24748945	ENSG00000158457	rs10464694	18546
cg24857958	ENSG00000073921	rs4944550	0
cg25220460	ENSG00000104714	rs11137025	0
cg25286967	ENSG00000118046	rs7247576	0
cg25299176	ENSG00000150540	rs10211049	280780
cg25400396	ENSG00000138468	rs12491955	0
cg25404033	ENSG00000161905	rs200739390	63184
cg25620548	ENSG00000142347	rs1609712	19039
cg25748542	ENSG00000143515	rs1889312	2689
cg25748542	ENSG00000160712	rs1889312	51195
cg25961221	ENSG00000166689	rs2237969	455345
cg26027780	ENSG00000160208	rs9637218	94156
cg26043149	ENSG00000071127	rs79841358	19936
cg26114043	ENSG00000003249	rs4374173	16709
cg26114043	ENSG00000141013	rs4374173	0
cg26257814	ENSG00000162086	rs220376	26887
cg26395761	ENSG00000258701	rs4983388	28061
cg26414235	ENSG00000041357	rs7166158	107148
cg26518628	ENSG00000269893	rs1818521	121025
cg26518628	ENSG00000145388	rs1818521	284518
cg26607758	ENSG00000100429	rs735119	54865
cg26612794	ENSG00000198106	rs252287	96905
cg26663686	ENSG00000198598	rs11615253	23359
cg26701943	ENSG00000175115	rs2430978	21177
cg26709343	ENSG00000138246	rs6439357	0
cg26826117	ENSG00000259363	rs11854651	0
cg26860703	ENSG00000187726	rs75163598	0
cg26860994	ENSG00000176915	rs2875247	172417
cg26883884	ENSG00000185015	rs7000779	139090
cg26883884	ENSG00000104267	rs7000779	40687
cg27049766	ENSG00000114770	rs12491955	82491124
cg27049766	ENSG00000138468	rs12491955	0
cg27101157	ENSG00000141574	rs7502317	41942
cg27110877	ENSG00000085831	rs2784128	890746
cg27344576	ENSG00000032389	rs10182368	0
cg27348863	ENSG00000188295	rs142794004	286
cg27348863	ENSG00000188295	rs12140983	6676
cg27371125	ENSG00000198663	rs9368966	14215
cg27409113	ENSG00000149531	rs35973039	244571
cg27420365	ENSG00000198964	rs11006259	0
cg27539482	ENSG00000143799	rs1317170	2533
