# Supplementary material for: Genome-wide identification of genes regulating DNA methylation using genetic anchors for causal inference
Source: Genome Biol. 2020 Aug 28;21:220. doi: 10.1186/s13059-020-02114-z (PMC7453518; doi:10.1186/s13059-020-02114-z)
Supplement: Supplementary file 11 — Additional file 11: Table S11. GO molecular functions terms (DAVID). [file 13059_2020_2114_MOESM11_ESM.csv]

Category	Term	Count	Percentage	PValue	Genes	List_Total	Pop_Hits	Pop_Total	Fold_Enrichment	Bonferroni	Benjamini	FDR
GOTERM_MF_DIRECT	GO:0003676~nucleic acid binding	99	12.515802781289507	1.0911847497379678e-14	ENSG00000146587, ENSG00000162086, ENSG00000175322, ENSG00000198521, ENSG00000172667, ENSG00000198131, ENSG00000251369, ENSG00000175691, ENSG00000011590, ENSG00000177311, ENSG00000125945, ENSG00000152439, ENSG00000121390, ENSG00000184939, ENSG00000188227, ENSG00000136870, ENSG00000197857, ENSG00000171817, ENSG00000213020, ENSG00000188295, ENSG00000165702, ENSG00000099899, ENSG00000070476, ENSG0000…	703	462	7247	2.209002235318025	9.07407482486633e-12	9.07407482486633e-12	1.679767436257862e-11
GOTERM_MF_DIRECT	GO:0003677~DNA binding	114	14.412136536030342	4.67973237963838e-9	ENSG00000198521, ENSG00000162086, ENSG00000198131, ENSG00000112592, ENSG00000099817, ENSG00000251369, ENSG00000152804, ENSG00000175691, ENSG00000011590, ENSG00000125945, ENSG00000099821, ENSG00000184939, ENSG00000124789, ENSG00000136870, ENSG00000197857, ENSG00000171817, ENSG00000213020, ENSG00000188295, ENSG00000178295, ENSG00000165702, ENSG00000117139, ENSG00000124831, ENSG00000105968, ENSG0000…	703	691	7247	1.7007079438338486	3.902889197271442e-6	1.9514465027237193e-6	7.222680387108937e-6
GOTERM_MF_DIRECT	GO:0046872~metal ion binding	146	18.45764854614412	1.4481930393006146e-8	ENSG00000198521, ENSG00000162086, ENSG00000175322, ENSG00000145354, ENSG00000198131, ENSG00000141101, ENSG00000251369, ENSG00000175691, ENSG00000011590, ENSG00000177311, ENSG00000125945, ENSG00000152439, ENSG00000153975, ENSG00000184939, ENSG00000188227, ENSG00000136870, ENSG00000197857, ENSG00000171817, ENSG00000105963, ENSG00000213020, ENSG00000132744, ENSG00000136098, ENSG00000188295, ENSG0000…	703	973	7247	1.546831301469696	1.2077857130421421e-5	4.0259685851751215e-6	2.2351352402250058e-5
GOTERM_MF_DIRECT	GO:0003700~transcription factor activity, sequence-specific DNA binding	73	9.22882427307206	4.429304225034675e-8	ENSG00000198521, ENSG00000185022, ENSG00000198131, ENSG00000103326, ENSG00000189298, ENSG00000112592, ENSG00000227124, ENSG00000102554, ENSG00000177311, ENSG00000197566, ENSG00000125945, ENSG00000152439, ENSG00000169981, ENSG00000167637, ENSG00000123411, ENSG00000188785, ENSG00000188227, ENSG00000136870, ENSG00000137265, ENSG00000171817, ENSG00000198182, ENSG00000213020, ENSG00000250571, ENSG0000…	703	393	7247	1.9148433286641402	3.693971575313704e-5	9.235056866896407e-6	6.836168615631522e-5
GOTERM_MF_DIRECT	GO:0008970~phosphatidylcholine 1-acylhydrolase activity	4	0.5056890012642226	0.007794353203665417	ENSG00000105499, ENSG00000176485, ENSG00000243708, ENSG00000116711	703	5	7247	8.246941678520626	0.9985350827827658	0.7288793377452298	11.37613555324094
GOTERM_MF_DIRECT	GO:0004623~phospholipase A2 activity	6	0.7585335018963337	0.008005019610903743	ENSG00000105499, ENSG00000176485, ENSG00000243708, ENSG00000163803, ENSG00000184381, ENSG00000116711	703	14	7247	4.41800447063605	0.9987728382822374	0.672797233899459	11.666107722632923
GOTERM_MF_DIRECT	GO:0004012~phospholipid-translocating ATPase activity	5	0.6321112515802781	0.016542975617002985	ENSG00000166377, ENSG00000143515, ENSG00000068650, ENSG00000054793, ENSG00000104043	703	11	7247	4.685762317341265	0.9999990921952291	0.8629572497116228	22.698678036942887
GOTERM_MF_DIRECT	GO:0000978~RNA polymerase II core promoter proximal region sequence-specific DNA binding	21	2.6548672566371683	0.01661389806472724	ENSG00000197020, ENSG00000175322, ENSG00000152926, ENSG00000090447, ENSG00000189298, ENSG00000125618, ENSG00000112592, ENSG00000170365, ENSG00000005436, ENSG00000198039, ENSG00000130844, ENSG00000152804, ENSG00000081665, ENSG00000102554, ENSG00000196705, ENSG00000250312, ENSG00000188171, ENSG00000181220, ENSG00000182141, ENSG00000141568, ENSG00000137265	703	125	7247	1.7318577524893315	0.9999991451868647	0.8256251293840046	22.784671735421867
GOTERM_MF_DIRECT	GO:0004622~lysophospholipase activity	5	0.6321112515802781	0.022949035804644292	ENSG00000105499, ENSG00000243708, ENSG00000100997, ENSG00000163803, ENSG00000116711	703	12	7247	4.295282124229493	0.9999999961009436	0.8836779174289964	30.115199150541905
GOTERM_MF_DIRECT	GO:0000287~magnesium ion binding	19	2.402022756005057	0.034347782877975505	ENSG00000116062, ENSG00000071242, ENSG00000068650, ENSG00000074800, ENSG00000054793, ENSG00000060237, ENSG00000133275, ENSG00000166377, ENSG00000101109, ENSG00000107968, ENSG00000143515, ENSG00000101365, ENSG00000198752, ENSG00000169299, ENSG00000122643, ENSG00000118046, ENSG00000141568, ENSG00000104043, ENSG00000185100	703	118	7247	1.6598717361429227	0.999999999999781	0.9457936855900736	41.69256649983703
GOTERM_MF_DIRECT	GO:0043565~sequence-specific DNA binding	22	2.781289506953224	0.036626254041240744	ENSG00000185022, ENSG00000109381, ENSG00000090447, ENSG00000189298, ENSG00000127124, ENSG00000068024, ENSG00000113916, ENSG00000152804, ENSG00000162711, ENSG00000102554, ENSG00000127528, ENSG00000122386, ENSG00000169981, ENSG00000142599, ENSG00000133794, ENSG00000141510, ENSG00000123411, ENSG00000106153, ENSG00000141568, ENSG00000137265, ENSG00000105717, ENSG00000198353	703	144	7247	1.574936778884147	0.9999999999999695	0.9409320762810269	43.7801502759046
GOTERM_MF_DIRECT	GO:0004674~protein serine/threonine kinase activity	28	3.5398230088495577	0.03768800124515754	ENSG00000071242, ENSG00000080823, ENSG00000165752, ENSG00000035664, ENSG00000133275, ENSG00000156711, ENSG00000130758, ENSG00000107968, ENSG00000198752, ENSG00000120539, ENSG00000135503, ENSG00000186716, ENSG00000118046, ENSG00000133597, ENSG00000165025, ENSG00000181409, ENSG00000136098, ENSG00000128829, ENSG00000139567, ENSG00000067606, ENSG00000060237, ENSG00000164776, ENSG00000115687, ENSG0000…	703	196	7247	1.4726681568786832	0.9999999999999878	0.930744365445151	44.728879678352726
GOTERM_MF_DIRECT	GO:0031005~filamin binding	3	0.37926675094816686	0.04924624297993258	ENSG00000164877, ENSG00000151640, ENSG00000183688	703	4	7247	7.7315078236130885	1	0.9608275197559475	54.13270314817042
GOTERM_MF_DIRECT	GO:0030275~LRR domain binding	3	0.37926675094816686	0.04924624297993258	ENSG00000070476, ENSG00000118046, ENSG00000093167	703	4	7247	7.7315078236130885	1	0.9608275197559475	54.13270314817042
GOTERM_MF_DIRECT	GO:0044212~transcription regulatory region DNA binding	14	1.7699115044247788	0.06434225354466563	ENSG00000090447, ENSG00000176024, ENSG00000125618, ENSG00000127124, ENSG00000112592, ENSG00000068024, ENSG00000172059, ENSG00000185811, ENSG00000152804, ENSG00000162367, ENSG00000123411, ENSG00000141510, ENSG00000181220, ENSG00000109320	703	85	7247	1.6978997573424817	1	0.9809717226447483	64.17211436976156
GOTERM_MF_DIRECT	GO:0015459~potassium channel regulator activity	5	0.6321112515802781	0.0893759760812977	ENSG00000135643, ENSG00000067606, ENSG00000069424, ENSG00000187446, ENSG00000180509	703	18	7247	2.863521416152995	1	0.9945140207542915	76.42556371621518
GOTERM_MF_DIRECT	GO:0001085~RNA polymerase II transcription factor binding	5	0.6321112515802781	0.0893759760812977	ENSG00000162367, ENSG00000131196, ENSG00000082701, ENSG00000165702, ENSG00000141510	703	18	7247	2.863521416152995	1	0.9945140207542915	76.42556371621518
