# Supplementary material for: Genome-wide identification of genes regulating DNA methylation using genetic anchors for causal inference
Source: Genome Biol. 2020 Aug 28;21:220. doi: 10.1186/s13059-020-02114-z (PMC7453518; doi:10.1186/s13059-020-02114-z)
Supplement: Supplementary file 12 — Additional file 12: Table S12. Transcription factor binding site enrichments, includes the overlap between target CpGs and ChIP-seq peaks for each experiment, the overlap between the background regions and the ChIP-seq peaks, and the enrichment statistics (Fisher’s exact test). [file 13059_2020_2114_MOESM12_ESM.csv]

Ensembl_ID	HGNC_ID	experiment	cellLine	n_target_cpgs	nr_peaks	overlap	frac_overlap	bg_size	bg_overlap	frac_bg_overlap	OR	p	conf.int.lower	conf.int.upper	tfTitles	caller	simes_p	simes_p_min
ENSG00000109320	NFKB1	EXP030252	LoVo (colorectal adenocarcinoma)	255	59	0	0	99636	13	1.3047492874061585e-4	0	1	0	128.91694447242085	NFKB1	macs2	1	1.291301964553642e-103
ENSG00000109320	NFKB1	EXP031989	pooled Yoruba and Tuscan lymphoblastoid cell lines	255	568	0	0	99636	11	1.104018627805211e-4	0	0.9999999999999999	0	157.00017161249264	NFKB1	macs2	1	1.291301964553642e-103
ENSG00000109320	NFKB1	EXP031990	pooled Yoruba and Tuscan lymphoblastoid cell lines	255	423	0	0	99636	2	2.0073065960094746e-5	0	0.9999999999999999	0	2131.9309566986026	NFKB1	macs2	1	1.291301964553642e-103
ENSG00000109320	NFKB1	EXP034345	L1236 (Hodgkin lymphoma)	255	63817	137	0.5372549019607843	99636	7319	0.07345738488096672	14.643314572196992	2.3449531617104774e-84	11.350733236035111	18.919157578379487	NFKB1	macs2	8.207336065986671e-84	1.291301964553642e-103
ENSG00000109320	NFKB1	EXP048573	MCF10A-ER-Src	255	9986	29	0.11372549019607843	99636	270	0.0027098639046127903	47.18511433189548	1.1691503710955817e-36	30.33988845349781	71.14882643660941	NFKB1	macs2	2.7280175325563573e-36	1.291301964553642e-103
ENSG00000109320	NFKB1	EXP048574	MCF10A-ER-Src	255	57328	42	0.16470588235294117	99636	1553	0.01558673571801357	12.45581757895005	1.822796347193983e-29	8.68965713566942	17.481983267460258	NFKB1	macs2	3.18989360758947e-29	1.291301964553642e-103
ENSG00000109320	NFKB1	EXP054688	GM12878 (female B-cells lymphoblastoid cell line)	255	22281	97	0.3803921568627451	99636	1520	0.015255530129672006	39.62191073238789	1.8447170922194887e-104	30.283690042491624	51.54253808353125	NFKB1	macs2	1.291301964553642e-103	1.291301964553642e-103
ENSG00000215421	ZNF407	EXP030146	LoVo (colorectal adenocarcinoma)	28	27972	13	0.4642857142857143	99795	4398	0.044070344205621524	18.797027684391423	4.8223797587762015e-11	8.225015670387902	42.3725737024701	ZNF407	macs2	4.822379758776201e-11	4.9261461802282993e-23
ENSG00000215421	ZNF407	EXP040144	K562 (myelogenous leukemia)	28	4524	16	0.5714285714285714	99795	1284	0.012866376070945438	102.23305210123164	1.6420487267427665e-23	45.2565137724615	237.66390433114756	ZNF407	macs2	4.9261461802282993e-23	4.9261461802282993e-23
ENSG00000215421	ZNF407	EXP040309	K562 (myelogenous leukemia)	28	6760	14	0.5	99795	1105	0.011072699033017686	89.44123686818558	1.5831207116358525e-20	39.32561220026921	202.11856367377428	ZNF407	macs2	2.374681067453779e-20	4.9261461802282993e-23
ENSG00000102554	KLF5	EXP030225	LoVo (colorectal adenocarcinoma)	64	26254	4	0.0625	99763	4156	0.041658731192927234	1.5336024114817954	0.3425545664990752	0.40452367248821564	4.138038658854966	KLF5	macs2	0.8906418728975953	5.785042176839467e-9
ENSG00000102554	KLF5	EXP030657	GP5d (colon adenocarcinoma)	64	13044	14	0.21875	99763	2318	0.023235067109048445	11.773416267852287	2.2250162218613334e-10	5.999091678360196	21.661300783139417	KLF5	macs2	5.785042176839467e-9	5.785042176839467e-9
ENSG00000102554	KLF5	EXP030664	GP5d (colon adenocarcinoma)	64	2504	1	0.015625	99763	206	0.0020648937983019757	7.6707566853913765	0.12443803350046756	0.1903091533862992	44.78120605696283	KLF5	macs2	0.35948765233468405	5.785042176839467e-9
ENSG00000102554	KLF5	EXP033087	LoVo (colorectal adenocarcinoma)	64	9951	1	0.015625	99763	2184	0.021891883764521915	0.7091925396655452	1	0.017670082084921365	4.1020699933070714	KLF5	macs2	1	5.785042176839467e-9
ENSG00000102554	KLF5	EXP033090	LoVo (colorectal adenocarcinoma)	64	417	0	0	99763	47	4.711165462145284e-4	0	0.9999999999999999	0	130.69929135750408	KLF5	macs2	1	5.785042176839467e-9
ENSG00000102554	KLF5	EXP033095	YCC3 (gastric adenocarcinoma)	64	3115	0	0	99763	385	0.0038591461764381583	0	1	0	15.383780584305278	KLF5	macs2	1	5.785042176839467e-9
ENSG00000102554	KLF5	EXP033098	AGS (gastric adenocarcinoma)	64	1427	3	0.046875	99763	124	0.0012429457815021602	39.55106959629662	7.915204190652582e-5	7.823924455955121	123.36447526244937	KLF5	macs2	4.115906179139343e-4	5.785042176839467e-9
ENSG00000102554	KLF5	EXP033101	KATOIII (signet ring cell gastric adenocarcinoma)	64	31276	17	0.265625	99763	8720	0.08740715495724868	3.7761934835353013	2.539286446062897e-5	2.032039111997285	6.702124168660358	KLF5	macs2	1.650536189940883e-4	5.785042176839467e-9
ENSG00000102554	KLF5	EXP034443	pancreatic ductal adenocarcinoma	64	73028	28	0.4375	99763	16018	0.16056052845243227	4.066325217830528	1.5523678280696964e-7	2.389361034680492	6.855715427191929	KLF5	macs2	2.0180781764906055e-6	5.785042176839467e-9
ENSG00000102554	KLF5	EXP036716	HUES64 (embryonic stem cells)	64	768	0	0	99763	169	0.001694014815111815	0	1	0	35.35152171225101	KLF5	macs2	1	5.785042176839467e-9
ENSG00000102554	KLF5	EXP036717	HUES64 (embryonic stem cells)	64	371	0	0	99763	68	6.816154285657007e-4	0	1	0	89.30095129193656	KLF5	macs2	1	5.785042176839467e-9
ENSG00000102554	KLF5	EXP036718	HUES64 (embryonic stem cells)	64	2061	0	0	99763	584	0.005853873680623077	0	1	0	10.107870531335546	KLF5	macs2	1	5.785042176839467e-9
ENSG00000102554	KLF5	EXP039906	GM12878 (female B-cells lymphoblastoid cell line)	64	15285	1	0.015625	99763	7953	0.07971893387327968	0.18324082982911463	0.0615425573157838	0.004570497207719962	1.0590878176411458	KLF5	macs2	0.22858664145862553	5.785042176839467e-9
ENSG00000102554	KLF5	EXP049087	BICR31 (Tongue squamous cell carcinoma cell)	64	33550	14	0.21875	99763	5421	0.05433878291550976	4.8726024246586555	7.1442732287689274e-06	2.4860056251622975	8.959851068555446	KLF5	macs2	6.191703464933071e-5	5.785042176839467e-9
ENSG00000102554	KLF5	EXP049089	HEK293T (embryonic kidney)	64	19625	0	0	99763	4063	0.04072652185680062	0	0.11561346257326384	0	1.3981956947474399	KLF5	macs2	0.3757437533631075	5.785042176839467e-9
ENSG00000102554	KLF5	EXP049090	HEK293T (embryonic kidney)	64	13215	0	0	99763	2541	0.025470364764491847	0	0.41479374736321323	0	2.271856444933382	KLF5	macs2	0.8987197859536287	5.785042176839467e-9
ENSG00000102554	KLF5	EXP049091	HEK293T (embryonic kidney)	64	18910	2	0.03125	99763	4793	0.048043863957579466	0.6391673499621284	0.7706750239667114	0.07570115120424352	2.409603674753136	KLF5	macs2	1	5.785042176839467e-9
ENSG00000102554	KLF5	EXP049092	HEK293T (embryonic kidney)	64	14879	2	0.03125	99763	3395	0.03403065264677285	0.915654480589876	1	0.10843562380392166	3.4525692960047785	KLF5	macs2	1	5.785042176839467e-9
ENSG00000102554	KLF5	EXP049093	HEK293T (embryonic kidney)	64	22804	1	0.015625	99763	4968	0.0497980213105059	0.3028770978632051	0.378728227543399	0.00755136168005864	1.7508486946408217	KLF5	macs2	0.895175810557125	5.785042176839467e-9
ENSG00000102554	KLF5	EXP049094	HEK293T (embryonic kidney)	64	28059	2	0.03125	99763	5720	0.057335886049938355	0.5303471501587833	0.5869820015489616	0.06282243539921428	1.9990802187086316	KLF5	macs2	1	5.785042176839467e-9
ENSG00000102554	KLF5	EXP049095	HEK293T (embryonic kidney)	64	20224	3	0.046875	99763	4408	0.0441847177811413	1.0639142915909103	0.7610697194410249	0.21341567381205667	3.261243361554467	KLF5	macs2	1	5.785042176839467e-9
ENSG00000102554	KLF5	EXP049096	HEK293T (embryonic kidney)	64	19453	4	0.0625	99763	4597	0.046079207722301854	1.3800970958413852	0.5408277586510565	0.3640734290352505	3.723887702484194	KLF5	macs2	1	5.785042176839467e-9
ENSG00000102554	KLF5	EXP049097	HCC95 (squamous cell lung carcinoma)	64	5577	0	0	99763	907	0.009091546966310156	0	1	0	6.47955785452014	KLF5	macs2	1	5.785042176839467e-9
ENSG00000102554	KLF5	EXP049098	HCC95 (squamous cell lung carcinoma)	64	9533	0	0	99763	2173	0.021781622445195114	0	0.6517238083074525	0	2.6668581419919204	KLF5	macs2	1	5.785042176839467e-9
ENSG00000102554	KLF5	EXP049099	HCC95 (squamous cell lung carcinoma)	64	322	0	0	99763	42	4.2099776470234457e-4	0	1	0	146.88697721144948	KLF5	macs2	1	5.785042176839467e-9
ENSG00000102554	KLF5	EXP049100	HCC95 (squamous cell lung carcinoma)	64	7422	4	0.0625	99763	1324	0.01327145334442629	4.956275919626944	0.010536777343270956	1.3061676232949415	13.393434508606504	KLF5	macs2	0.04565936848750748	5.785042176839467e-9
ENSG00000196793	ZNF239	EXP039754	HEK293 (embryonic kidney)	3	409	2	0.6666666666666666	99716	22	2.206265794857395e-4	11955.795610855444	1.6651178494644975e-7	444.14671366068654	4503599627370496	ZNF239	macs2	1.6651178494644975e-7	1.6651178494644975e-7
ENSG00000167785	ZNF558	EXP039473	HEK293 (embryonic kidney)	5	5845	3	0.6	99861	283	0.0028339391754538808	531.4485988213415	2.3144156868285206e-7	60.192690712183335	7628.978177563957	ZNF558	macs2	2.3144156868285206e-7	2.3144156868285206e-7
ENSG00000174652	ZNF266	EXP030075	LoVo (colorectal adenocarcinoma)	38	4044	0	0	99844	907	0.009084171307239293	0	1	0	11.144006498349183	ZNF266	macs2	1	3.6869735970253015e-7
ENSG00000174652	ZNF266	EXP039792	HEK293 (embryonic kidney)	38	1573	3	0.07894736842105263	99844	26	2.604062337246104e-4	328.70898742284135	1.8434867985126507e-7	60.715652887163444	1129.2610269570284	ZNF266	macs2	3.6869735970253015e-7	3.6869735970253015e-7
ENSG00000182986	ZNF320	EXP035944	HEK293 (embryonic kidney)	26	10843	5	0.19230769230769232	99839	650	0.00651048187582007	36.322887552824625	7.016176861560674e-7	10.669100697561902	99.67277195003085	ZNF320	macs2	7.016176861560674e-7	7.016176861560674e-7
ENSG00000185811	IKZF1	EXP000615	CD133+ umbilical cord blood cells	54	6141	0	0	99744	922	0.009243663779274944	0	1	0	7.59404630235213	IKZF1	macs2	1	1.3651853292839565e-6
ENSG00000185811	IKZF1	EXP033308	pre-B acute lymphoblastic leukemia	54	21180	5	0.09259259259259259	99744	3359	0.03367621110041707	2.9279357796241507	0.035090649089270023	0.9098490242909325	7.313906007906321	IKZF1	macs2	0.07719942799639405	1.3651853292839565e-6
ENSG00000185811	IKZF1	EXP036933	pre-B acute lymphoblastic leukemia	54	3916	1	0.018518518518518517	99744	316	0.003168110362528072	5.936275854307702	0.15789046955656158	0.14709593163689413	34.74110724398856	IKZF1	macs2	0.24811359501745392	1.3651853292839565e-6
ENSG00000185811	IKZF1	EXP036934	pre-B acute lymphoblastic leukemia	54	4140	3	0.05555555555555555	99744	323	0.003238290022457491	18.10366893291553	7.571702068678477e-4	3.5959767570820618	56.4462000102987	IKZF1	macs2	0.002082218068886581	1.3651853292839565e-6
ENSG00000185811	IKZF1	EXP036935	pre-B acute lymphoblastic leukemia	54	16094	3	0.05555555555555555	99744	1757	0.017615094642284248	3.2804511516904604	0.07005229484223717	0.6542706288815995	10.159188342950818	IKZF1	macs2	0.12842920721076814	1.3651853292839565e-6
ENSG00000185811	IKZF1	EXP036936	pre-B acute lymphoblastic leukemia	54	22305	11	0.2037037037037037	99744	2657	0.02663819377606673	9.346834509954322	1.6226985982207274e-7	4.342042724144442	18.455515254701965	IKZF1	macs2	1.7849684580428001e-6	1.3651853292839565e-6
ENSG00000185811	IKZF1	EXP039605	GM12878 (female B-cells lymphoblastoid cell line)	54	120771	9	0.16666666666666666	99744	13137	0.13170717035611165	1.31851393150248	0.4211199233657202	0.566550446733805	2.7321890774778828	IKZF1	macs2	0.5147021285581024	1.3651853292839565e-6
ENSG00000185811	IKZF1	EXP039659	GM12878 (female B-cells lymphoblastoid cell line)	54	77156	9	0.16666666666666666	99744	23105	0.23164300609560476	0.663411181233348	0.33253998346968555	0.2850521044663272	1.3745488331283746	IKZF1	macs2	0.4572424772708176	1.3651853292839565e-6
ENSG00000185811	IKZF1	EXP040039	K562 (myelogenous leukemia)	54	132437	19	0.35185185185185186	99744	9447	0.09471246390760346	5.1886318365972395	2.482155144152648e-7	2.802577200135586	9.326705669757649	IKZF1	macs2	1.3651853292839565e-6	1.3651853292839565e-6
ENSG00000185811	IKZF1	EXP040042	K562 (myelogenous leukemia)	54	87812	17	0.3148148148148148	99744	11660	0.11689926211100417	3.471143103244836	9.226539027188158e-5	1.8320691879003332	6.322450985827355	IKZF1	macs2	3.3830643099689916e-4	1.3651853292839565e-6
ENSG00000185811	IKZF1	EXP040096	HepG2 (hepatoblastoma)	54	3449	0	0	99744	38	3.8097529675970484e-4	0	1	0	193.99809904997622	IKZF1	macs2	1	1.3651853292839565e-6
ENSG00000105497	ZNF175	EXP035942	HEK293 (embryonic kidney)	3	9090	2	0.6666666666666666	99820	52	5.209376878381086e-4	3641.2231577011958	8.613569215350094e-7	194.80168671453103	4503599627370496	ZNF175	macs2	1.7227138430700189e-6	1.7227138430700189e-6
ENSG00000105497	ZNF175	EXP039319	K562 (myelogenous leukemia)	3	10612	0	0	99820	632	0.006331396513724705	0	1	0	377.9893698588796	ZNF175	macs2	1	1.7227138430700189e-6
ENSG00000186130	ZBTB6	EXP035955	HEK293 (embryonic kidney)	17	27163	5	0.29411764705882354	99782	4012	0.04020765268284861	9.94561204321761	4.343086746181176e-4	2.7436172901825695	30.336069256307127	ZBTB6	macs2	4.343086746181176e-4	2.031174543981213e-6
ENSG00000186130	ZBTB6	EXP040311	HEK293 (embryonic kidney)	17	8038	6	0.35294117647058826	99782	2149	0.021536950552203803	24.773011228541392	1.0155872719906065e-6	7.517580842673776	73.19979582242728	ZBTB6	macs2	2.031174543981213e-6	2.031174543981213e-6
ENSG00000079263	SP140	EXP038059	macrophages	14	172114	14	1	99775	44603	0.4470358306188925	Inf	1.2745530656918148e-5	4.102511813207559	Inf	SP140	macs2	2.5491061313836295e-5	2.5491061313836295e-5
ENSG00000079263	SP140	EXP038060	macrophages	14	207976	14	1	99775	62940	0.6308193435229266	Inf	0.0018342924075280711	1.9411592004935974	Inf	SP140	macs2	0.0018342924075280711	2.5491061313836295e-5
ENSG00000112182	BACH2	EXP031933	OCI-LY7 (diffuse large B-cell lymphoma)	20	14493	1	0.05	99792	1525	0.015281786115119449	3.3913415769752047	0.265206648305469	0.08156946715382754	21.356469303790004	BACH2	macs2	0.265206648305469	7.687089424096211e-5
ENSG00000112182	BACH2	EXP035078	DOHH2 (diffuse large B-cell lymphoma)	20	11041	1	0.05	99792	537	0.005381192881192882	9.726986820801573	0.10246626371920488	0.23369579037385718	61.40136352032297	BACH2	macs2	0.1280828296490061	7.687089424096211e-5
ENSG00000112182	BACH2	EXP035083	OCI-LY7 (diffuse large B-cell lymphoma)	20	6769	1	0.05	99792	245	0.0024551066217732885	21.383727495834062	0.048159897851293695	0.5126065498811846	135.4788829535567	BACH2	macs2	0.08026649641882283	7.687089424096211e-5
ENSG00000112182	BACH2	EXP040449	B-cells	20	26984	3	0.15	99792	935	0.009369488536155202	18.646632139009576	8.370044960214466e-4	3.4968210921326968	64.61737551119421	BACH2	macs2	0.0020925112400536163	7.687089424096211e-5
ENSG00000112182	BACH2	EXP040450	B-cells	20	5752	3	0.15	99792	238	0.0023849607182940516	73.75511149852241	1.5374178848192423e-5	13.766830969444051	256.58222389736346	BACH2	macs2	7.687089424096211e-5	7.687089424096211e-5
ENSG00000122386	ZNF205	EXP044838	HepG2 (hepatoblastoma)	11	78803	7	0.6363636363636364	99801	13246	0.13272412100079156	11.434813866727186	1.465932833257612e-4	2.9065020057636253	53.291901393563556	ZNF205	macs2	1.465932833257612e-4	1.465932833257612e-4
ENSG00000141510	TP53	EXP000324	U2OS (osteosarcoma)	5	3074	0	0	99821	64	6.411476543011992e-4	0	1.0000000000000002	0	1791.631861316241	TP53	macs2	1	1.6598853897054346e-4
ENSG00000141510	TP53	EXP000325	U2OS (osteosarcoma)	5	3469	0	0	99821	42	4.2075314813516196e-4	0	0.9999999999999999	0	2833.8206857547316	TP53	macs2	1	1.6598853897054346e-4
ENSG00000141510	TP53	EXP000326	U2OS (osteosarcoma)	5	1224	0	0	99821	11	1.101972530830186e-4	0	1	0	16383.999999940395	TP53	macs2	1	1.6598853897054346e-4
ENSG00000141510	TP53	EXP000327	U2OS (osteosarcoma)	5	1395	0	0	99821	11	1.101972530830186e-4	0	1	0	16383.999999940395	TP53	macs2	1	1.6598853897054346e-4
ENSG00000141510	TP53	EXP000328	U2OS (osteosarcoma)	5	574	0	0	99821	5	5.008966049228118e-5	0	0.9999999999999999	0	4503599627370496	TP53	macs2	1	1.6598853897054346e-4
ENSG00000141510	TP53	EXP000329	U2OS (osteosarcoma)	5	698	0	0	99821	5	5.008966049228118e-5	0	0.9999999999999999	0	4503599627370496	TP53	macs2	1	1.6598853897054346e-4
ENSG00000141510	TP53	EXP000455	IMR90 (lung fibroblasts)	5	3475	0	0	99821	132	0.0013223670369962232	0	1	0	821.0170458299091	TP53	macs2	1	1.6598853897054346e-4
ENSG00000141510	TP53	EXP000510	SaOS2 (osteosarcoma)	5	33426	1	0.2	99821	1646	0.016489516234058966	14.913915441891056	0.0798175530065682	0.30259804417138747	150.87988401993846	TP53	macs2	0.2829895061141964	1.6598853897054346e-4
ENSG00000141510	TP53	EXP030066	LoVo (colorectal adenocarcinoma)	5	1038	0	0	99821	93	9.3166768515643e-4	0	1	0	1197.3612817794663	TP53	macs2	1	1.6598853897054346e-4
ENSG00000141510	TP53	EXP030509	WA09 (embryonic stem cells)	5	3605	0	0	99821	262	0.002624698209795534	0	1	0	415.7525058936505	TP53	macs2	1	1.6598853897054346e-4
ENSG00000141510	TP53	EXP030510	WA09 (embryonic stem cells)	5	4263	0	0	99821	215	0.002153855401168091	0	0.9999999999999999	0	504.976954462784	TP53	macs2	1	1.6598853897054346e-4
ENSG00000141510	TP53	EXP030511	WA09 (embryonic stem cells)	5	4616	3	0.6	99821	520	0.005209324691197243	285.69859807989553	1.4187054612866962e-6	32.704281362894584	3631.220248353433	TP53	macs2	1.6598853897054346e-4	1.6598853897054346e-4
ENSG00000141510	TP53	EXP030850	lymphoblastoid cells	5	87004	1	0.2	99821	4831	0.04839662996764208	4.9154337415904115	0.21970231857488653	0.09979481557294637	49.69425323280732	TP53	macs2	0.6764518756121507	1.6598853897054346e-4
ENSG00000141510	TP53	EXP030851	lymphoblastoid cells	5	8160	0	0	99821	167	0.0016729946604421915	0	1	0	653.1493522673082	TP53	macs2	1	1.6598853897054346e-4
ENSG00000141510	TP53	EXP030853	lymphoblastoid cells	5	3463	1	0.2	99821	34	3.40609691347512e-4	720.5100318268361	0.001751856538244636	14.478735905259777	8191.999999985097	TP53	macs2	0.029281030710660343	1.6598853897054346e-4
ENSG00000141510	TP53	EXP030855	lymphoblastoid cells	5	768	1	0.2	99821	21	2.1037657406758098e-4	1118.5402270399675	0.0011014538124326336	23.038482370698798	16383.999999940395	TP53	macs2	0.025774019210923628	1.6598853897054346e-4
ENSG00000141510	TP53	EXP030891	BJ (fibroblasts)	5	378	0	0	99821	1	1.0017932098456237e-5	0	1	0	4503599627370496	TP53	macs2	1	1.6598853897054346e-4
ENSG00000141510	TP53	EXP030892	BJ (fibroblasts)	5	296	0	0	99821	2	2.0035864196912474e-5	0	1	0	4503599627370496	TP53	macs2	1	1.6598853897054346e-4
ENSG00000141510	TP53	EXP031846	IMR90 (lung fibroblasts)	5	94092	0	0	99821	481	0.00481862533935745	0	1	0	225.74120140187264	TP53	macs2	1	1.6598853897054346e-4
ENSG00000141510	TP53	EXP031847	IMR90 (lung fibroblasts)	5	87312	0	0	99821	427	0.004277657006040813	0	0.9999999999999999	0	254.41742414907193	TP53	macs2	1	1.6598853897054346e-4
ENSG00000141510	TP53	EXP031848	IMR90 (lung fibroblasts)	5	3535	0	0	99821	18	1.8032277777221226e-4	0	0.9999999999999999	0	8191.999999985097	TP53	macs2	1	1.6598853897054346e-4
ENSG00000141510	TP53	EXP032117	U2OS (osteosarcoma)	5	10529	1	0.2	99821	283	0.002835074783863115	87.83524708230719	0.0141443253552751	1.7792691732553634	886.1669769992504	TP53	macs2	0.06619544266268747	1.6598853897054346e-4
ENSG00000141510	TP53	EXP032119	U2OS (osteosarcoma)	5	1821	0	0	99821	79	7.914166357780427e-4	0	1	0	1364.5444050275687	TP53	macs2	1	1.6598853897054346e-4
ENSG00000141510	TP53	EXP032121	U2OS (osteosarcoma)	5	10827	0	0	99821	150	0.0015026898147684354	0	1	0	739.306280981444	TP53	macs2	1	1.6598853897054346e-4
ENSG00000141510	TP53	EXP032123	U2OS (osteosarcoma)	5	47870	3	0.6	99821	1543	0.015457669227917973	95.49884699499074	3.621953436798191e-5	10.932233223962431	1119.8673410345966	TP53	macs2	0.002118842760526942	1.6598853897054346e-4
ENSG00000141510	TP53	EXP032665	MCF7 (Invasive ductal breast carcinoma)	5	181	0	0	99821	9	9.016138888610613e-5	0	1	0	16383.999999940395	TP53	macs2	1	1.6598853897054346e-4
ENSG00000141510	TP53	EXP032782	SaOS2 (osteosarcoma)	5	23986	0	0	99821	1816	0.018192564690796525	0	1	0	58.99912948695313	TP53	macs2	1	1.6598853897054346e-4
ENSG00000141510	TP53	EXP032953	BJ (fibroblasts)	5	233	0	0	99821	5	5.008966049228118e-5	0	0.9999999999999999	0	4503599627370496	TP53	macs2	1	1.6598853897054346e-4
ENSG00000141510	TP53	EXP032954	BJ (fibroblasts)	5	1337	0	0	99821	33	3.305917592490558e-4	0	1	0	3204.0403799853193	TP53	macs2	1	1.6598853897054346e-4
ENSG00000141510	TP53	EXP032998	neonatal keratinocytes	5	6338	0	0	99821	89	8.91595956762605e-4	0	1	0	1236.869866533897	TP53	macs2	1	1.6598853897054346e-4
ENSG00000141510	TP53	EXP032999	neonatal keratinocytes	5	12817	0	0	99821	361	0.0036164734875427013	0	1	0	301.1358982139785	TP53	macs2	1	1.6598853897054346e-4
ENSG00000141510	TP53	EXP033000	neonatal keratinocytes	5	17511	1	0.2	99821	489	0.0048987687961451	50.751902820365125	0.024303428465261987	1.0291115603901426	507.48151896772106	TP53	macs2	0.10531485668280194	1.6598853897054346e-4
ENSG00000141510	TP53	EXP033172	IMR90 (lung fibroblasts)	5	1327	0	0	99821	7	7.012552468919366e-5	0	1	0	16383.999999940395	TP53	macs2	1	1.6598853897054346e-4
ENSG00000141510	TP53	EXP033173	IMR90 (lung fibroblasts)	5	5651	0	0	99821	1535	0.015377525771130324	0	1	0	69.91823844789475	TP53	macs2	1	1.6598853897054346e-4
ENSG00000141510	TP53	EXP033174	IMR90 (lung fibroblasts)	5	30	0	0	99821	0	0	0	1	0	Inf	TP53	macs2	1	1.6598853897054346e-4
ENSG00000141510	TP53	EXP033175	IMR90 (lung fibroblasts)	5	30432	1	0.2	99821	4226	0.04233578104807605	5.654907003929011	0.19453536587974013	0.11480481078386214	57.164185024343084	TP53	macs2	0.6151523731872863	1.6598853897054346e-4
ENSG00000141510	TP53	EXP033251	GM06170 (fetal skin fibroblasts)	5	50799	2	0.4	99821	3175	0.031806934412598555	20.291776842977246	0.009496588551922893	1.694227005426769	177.32558061184653	TP53	macs2	0.05050458457158993	1.6598853897054346e-4
ENSG00000141510	TP53	EXP033252	GM00011 (fetal skin fibroblasts)	5	11634	1	0.2	99821	1012	0.01013814728363771	24.400529865856072	0.049719907762591754	0.49516006464883966	246.34260073542967	TP53	macs2	0.19390764027410784	1.6598853897054346e-4
ENSG00000141510	TP53	EXP033699	HCT-116 (colon carcinoma)	5	2265	0	0	99821	27	2.7048416665831837e-4	0	1	0	5336.449849016906	TP53	macs2	1	1.6598853897054346e-4
ENSG00000141510	TP53	EXP033701	HCT-116 (colon carcinoma)	5	116	0	0	99821	3	3.005379629536871e-5	0	1	0	4503599627370496	TP53	macs2	1	1.6598853897054346e-4
ENSG00000141510	TP53	EXP033725	MCF7 (Invasive ductal breast carcinoma)	5	4003	0	0	99821	24	2.4043037036294967e-4	0	1	0	6316.342609819675	TP53	macs2	1	1.6598853897054346e-4
ENSG00000141510	TP53	EXP033726	MDA-MB-175VII (invasive ductal carcinoma)	5	2148	0	0	99821	9	9.016138888610613e-5	0	1	0	16383.999999940395	TP53	macs2	1	1.6598853897054346e-4
ENSG00000141510	TP53	EXP033727	MDA-MB-468 (breast adenocarcinoma)	5	1968	0	0	99821	63	6.311297222027429e-4	0	1	0	1829.0322215469098	TP53	macs2	1	1.6598853897054346e-4
ENSG00000141510	TP53	EXP033728	HCC70 (ductal breast carcinoma)	5	1312	0	0	99821	38	3.8068141974133697e-4	0	1	0	3253.231107755096	TP53	macs2	1	1.6598853897054346e-4
ENSG00000141510	TP53	EXP033729	BT-549 (breast invasive ductal carcinoma)	5	418	0	0	99821	12	1.2021518518147484e-4	0	1	0	8191.999999985097	TP53	macs2	1	1.6598853897054346e-4
ENSG00000141510	TP53	EXP033847	HCT-116 (colon carcinoma)	5	1116	0	0	99821	28	2.8050209875677464e-4	0	0.9999999999999999	0	3476.1657890559936	TP53	macs2	1	1.6598853897054346e-4
ENSG00000141510	TP53	EXP033848	HCT-116 (colon carcinoma)	5	2388	0	0	99821	38	3.8068141974133697e-4	0	1	0	3253.231107755096	TP53	macs2	1	1.6598853897054346e-4
ENSG00000141510	TP53	EXP034495	HepG2 (hepatoblastoma)	5	1143	0	0	99821	12	1.2021518518147484e-4	0	1	0	8191.999999985097	TP53	macs2	1	1.6598853897054346e-4
ENSG00000141510	TP53	EXP034496	HepG2 (hepatoblastoma)	5	195	0	0	99821	4	4.007172839382495e-5	0	1	0	4503599627370496	TP53	macs2	1	1.6598853897054346e-4
ENSG00000141510	TP53	EXP034638	MDA-MB-231 (breast adenocarcinoma)	5	25613	0	0	99821	3331	0.033369731819957726	0	1	0	31.621244846416232	TP53	macs2	1	1.6598853897054346e-4
ENSG00000141510	TP53	EXP034682	SW480 (colon adenocarcinoma)	5	1210	0	0	99821	10	1.0017932098456237e-4	0	0.9999999999999999	0	16383.999999940395	TP53	macs2	1	1.6598853897054346e-4
ENSG00000141510	TP53	EXP035640	HCT-116 (colon carcinoma)	5	1595	0	0	99821	16	1.602869135752998e-4	0	0.9999999999999999	0	8191.999999985097	TP53	macs2	1	1.6598853897054346e-4
ENSG00000141510	TP53	EXP035641	HCT-116 (colon carcinoma)	5	416	0	0	99821	3	3.005379629536871e-5	0	1	0	4503599627370496	TP53	macs2	1	1.6598853897054346e-4
ENSG00000141510	TP53	EXP036013	dermal fibroblasts	5	5751	0	0	99821	380	0.00380681419741337	0	1	0	286.0171523638588	TP53	macs2	1	1.6598853897054346e-4
ENSG00000141510	TP53	EXP036014	dermal fibroblasts	5	3347	0	0	99821	88	8.815780246641488e-4	0	0.9999999999999999	0	1239.1247113526165	TP53	macs2	1	1.6598853897054346e-4
ENSG00000141510	TP53	EXP036824	MCF7 (Invasive ductal breast carcinoma)	5	491	0	0	99821	9	9.016138888610613e-5	0	1	0	16383.999999940395	TP53	macs2	1	1.6598853897054346e-4
ENSG00000141510	TP53	EXP036825	MCF7 (Invasive ductal breast carcinoma)	5	4562	1	0.2	99821	162	0.0016229049999499103	153.47431659000844	0.008137750022625668	3.1038594178746477	1547.0627958105608	TP53	macs2	0.04760583763236016	1.6598853897054346e-4
ENSG00000141510	TP53	EXP036826	MCF7 (Invasive ductal breast carcinoma)	5	8989	1	0.2	99821	196	0.0019635146912974225	126.96986269727006	0.009828497380970337	2.5673178021608014	1270.909710421675	TP53	macs2	0.04999713885102302	1.6598853897054346e-4
ENSG00000141510	TP53	EXP036827	MCF7 (Invasive ductal breast carcinoma)	5	5452	1	0.2	99821	160	0.0016028691357529979	155.4627551375622	0.008038222418004002	3.142491390039682	1548.2064142402448	TP53	macs2	0.04949852752139307	1.6598853897054346e-4
ENSG00000141510	TP53	EXP036828	MCF7 (Invasive ductal breast carcinoma)	5	3966	1	0.2	99821	58	5.810400617104617e-4	431.2606426866084	0.0029517099331408934	8.58520650849346	3861.610549385822	TP53	macs2	0.03453500621774845	1.6598853897054346e-4
ENSG00000141510	TP53	EXP036829	MCF7 (Invasive ductal breast carcinoma)	5	7500	1	0.2	99821	132	0.0013223670369962232	188.5970652810866	0.006643996841918421	3.805314574911809	2005.8380219634616	TP53	macs2	0.04318597947246974	1.6598853897054346e-4
ENSG00000141510	TP53	EXP036830	MCF7 (Invasive ductal breast carcinoma)	5	21953	1	0.2	99821	1789	0.01792208052413821	13.701665465540868	0.0864995316601779	0.2780183263233727	138.64587049932484	TP53	macs2	0.2891555772640233	1.6598853897054346e-4
ENSG00000141510	TP53	EXP036872	MCF7 (Invasive ductal breast carcinoma)	5	2129	1	0.2	99821	50	5.008966049228118e-4	503.4463987718508	0.002551887066768987	9.930654925115663	7477.015818955665	TP53	macs2	0.03317453186799683	1.6598853897054346e-4
ENSG00000141510	TP53	EXP036873	MCF7 (Invasive ductal breast carcinoma)	5	111	0	0	99821	2	2.0035864196912474e-5	0	1	0	4503599627370496	TP53	macs2	1	1.6598853897054346e-4
ENSG00000141510	TP53	EXP036874	MCF-7 C4-12 (invasive breast ductal carcinoma)	5	4118	1	0.2	99821	62	6.211117901042867e-4	401.7374509703676	0.0031515732803514196	8.041404941279708	3695.487692574443	TP53	macs2	0.0335212794364651	1.6598853897054346e-4
ENSG00000141510	TP53	EXP036875	MCF7 (Invasive ductal breast carcinoma)	5	113	0	0	99821	3	3.005379629536871e-5	0	1	0	4503599627370496	TP53	macs2	1	1.6598853897054346e-4
ENSG00000141510	TP53	EXP036900	SW480 (colon adenocarcinoma)	5	73211	0	0	99821	3957	0.03964095731359133	0	1.0000000000000002	0	26.44616183554668	TP53	macs2	1	1.6598853897054346e-4
ENSG00000141510	TP53	EXP036901	SW480 (colon adenocarcinoma)	5	127538	1	0.2	99821	22850	0.228909748449725	0.842136636977218	1	0.01709922329190015	8.50868543577786	TP53	macs2	1	1.6598853897054346e-4
ENSG00000141510	TP53	EXP037746	HCT-116 (colon carcinoma)	5	2166	1	0.2	99821	44	4.407890123320744e-4	560.6726953155027	0.0022519357513495412	11.258051034405215	8191.999999985097	TP53	macs2	0.03293456036348704	1.6598853897054346e-4
ENSG00000141510	TP53	EXP037747	HCT-116 (colon carcinoma)	5	19267	1	0.2	99821	718	0.007192875246691578	34.49911396901958	0.03549832125090423	0.6997127982202772	346.72245885762806	TP53	macs2	0.14833227094127838	1.6598853897054346e-4
ENSG00000141510	TP53	EXP037748	MCF7 (Invasive ductal breast carcinoma)	5	533	0	0	99821	11	1.101972530830186e-4	0	1	0	16383.999999940395	TP53	macs2	1	1.6598853897054346e-4
ENSG00000141510	TP53	EXP037749	MCF7 (Invasive ductal breast carcinoma)	5	50519	1	0.2	99821	2706	0.027108524258422577	8.97167922724986	0.12843165148673033	0.1821192342797233	90.73759756436924	TP53	macs2	0.4174028673318736	1.6598853897054346e-4
ENSG00000141510	TP53	EXP037750	SJSA-1(osteosarcoma)	5	3663	1	0.2	99821	172	0.0017230843209344727	145.2890180655619	0.008635268220781618	2.9241366180619517	1541.2115863440501	TP53	macs2	0.048110780087211875	1.6598853897054346e-4
ENSG00000141510	TP53	EXP037751	SJSA-1(osteosarcoma)	5	15232	1	0.2	99821	402	0.004027208703579407	61.813042347902204	0.020023200987404004	1.2523637289244873	637.264033944961	TP53	macs2	0.090104404443318	1.6598853897054346e-4
ENSG00000141510	TP53	EXP038407	MDA231-LM2-4175 (breast adenocarcinoma)	5	70746	0	0	99821	10395	0.10413640416345259	0	1	0	9.389483465837653	TP53	macs2	1	1.6598853897054346e-4
ENSG00000141510	TP53	EXP040930	MCF7 (Invasive ductal breast carcinoma)	5	18706	1	0.2	99821	1661	0.01663978521553581	14.777253185469242	0.08052028988191859	0.29982118206036296	149.48530814832597	TP53	macs2	0.2770845269466022	1.6598853897054346e-4
ENSG00000141510	TP53	EXP047456	MCF7 (Invasive ductal breast carcinoma)	5	315	0	0	99821	16	1.602869135752998e-4	0	0.9999999999999999	0	8191.999999985097	TP53	macs2	1	1.6598853897054346e-4
ENSG00000141510	TP53	EXP047468	MCF7 (Invasive ductal breast carcinoma)	5	1566	0	0	99821	47	4.708428086274431e-4	0	1	0	2528.386522285802	TP53	macs2	1	1.6598853897054346e-4
ENSG00000141510	TP53	EXP048266	PHA-simulated human T-lynphocytes	5	1132	0	0	99821	58	5.810400617104617e-4	0	1	0	1907.8285643141244	TP53	macs2	1	1.6598853897054346e-4
ENSG00000141510	TP53	EXP048267	PHA-simulated human T-lynphocytes	5	2786	1	0.2	99821	102	0.0010218290740425361	244.00397032246644	0.0051484445188021985	4.915836478178249	2370.1803745788834	TP53	macs2	0.037648000543741074	1.6598853897054346e-4
ENSG00000141510	TP53	EXP048268	PHA-simulated human T-lynphocytes	5	622	0	0	99821	26	2.6046623455986214e-4	0	0.9999999999999999	0	5635.212957909493	TP53	macs2	1	1.6598853897054346e-4
ENSG00000141510	TP53	EXP048269	PHA-simulated human T-lynphocytes	5	16195	1	0.2	99821	1352	0.013544244197112832	18.20563252705909	0.06595693523327886	0.36945463250265836	184.06158546979728	TP53	macs2	0.24115504444667585	1.6598853897054346e-4
ENSG00000141510	TP53	EXP048270	PHA-simulated human T-lynphocytes	5	5453	1	0.2	99821	208	0.002083729876478897	119.65154585970983	0.010424680946068222	2.419712246145477	1212.6907349614937	TP53	macs2	0.05082031961208258	1.6598853897054346e-4
ENSG00000141510	TP53	EXP048271	PHA-simulated human T-lynphocytes	5	3699	1	0.2	99821	87	8.715600925656926e-4	284.3580687050665	0.004399993171148952	5.753827296496401	3168.8005365096224	TP53	macs2	0.03959993854034057	1.6598853897054346e-4
ENSG00000141510	TP53	EXP048272	PHA-simulated human T-lynphocytes	5	33	0	0	99821	4	4.007172839382495e-5	0	1	0	4503599627370496	TP53	macs2	1	1.6598853897054346e-4
ENSG00000141510	TP53	EXP048273	PHA-simulated human T-lynphocytes	5	205	0	0	99821	10	1.0017932098456237e-4	0	0.9999999999999999	0	16383.999999940395	TP53	macs2	1	1.6598853897054346e-4
ENSG00000141510	TP53	EXP048274	PHA-simulated human T-lynphocytes	5	1851	1	0.2	99821	115	0.0011520621913224671	214.95995860621264	0.005796738191010632	4.363842817813202	2197.3426363519607	TP53	macs2	0.03989519813813199	1.6598853897054346e-4
ENSG00000141510	TP53	EXP048275	PHA-simulated human T-lynphocytes	5	1898	1	0.2	99821	95	9.517035493533425e-4	262.61728522959265	0.004799223259455682	5.274816797485571	2893.733439865551	TP53	macs2	0.04010779438259392	1.6598853897054346e-4
ENSG00000141510	TP53	EXP048276	PHA-simulated human T-lynphocytes	5	3971	1	0.2	99821	98	9.817573456487112e-4	253.93303705732083	0.004948901519899399	5.114758712488391	2421.5567100789194	TP53	macs2	0.038601431855215314	1.6598853897054346e-4
ENSG00000141510	TP53	EXP048277	PHA-simulated human T-lynphocytes	5	8484	1	0.2	99821	762	0.007633664259023652	32.496083235079425	0.03763748717766232	0.6590688749311369	326.79724196460063	TP53	macs2	0.15184779309608593	1.6598853897054346e-4
ENSG00000141510	TP53	EXP048303	U2OS (osteosarcoma)	5	3288	0	0	99821	177	0.001773173981426754	0	1	0	626.0415791082647	TP53	macs2	1	1.6598853897054346e-4
ENSG00000141510	TP53	EXP048304	U2OS (osteosarcoma)	5	5973	0	0	99821	301	0.003015397561635327	0	1	0	361.5116236260255	TP53	macs2	1	1.6598853897054346e-4
ENSG00000141510	TP53	EXP048305	U2OS (osteosarcoma)	5	6106	0	0	99821	212	0.002123801604872722	0	1	0	511.6501565711285	TP53	macs2	1	1.6598853897054346e-4
ENSG00000141510	TP53	EXP048593	IMR90 (lung fibroblasts)	5	9393	2	0.4	99821	471	0.004718446018372888	139.90773583197645	2.2193051250298017e-4	11.710524545480176	1255.2145572146285	TP53	macs2	0.00649146749071217	1.6598853897054346e-4
ENSG00000141510	TP53	EXP048595	SW480 (colon adenocarcinoma)	5	105113	0	0	99821	15346	0.15373518598290942	0	1	0	6.00776063822555	TP53	macs2	1	1.6598853897054346e-4
ENSG00000141510	TP53	EXP048596	SW480 (colon adenocarcinoma)	5	58242	0	0	99821	4359	0.04366816601717074	0	1	0	23.894581113653768	TP53	macs2	1	1.6598853897054346e-4
ENSG00000141510	TP53	EXP048925	HIV-1 latently-infected central memory T cells cultured from uninfected primary T cells	5	41	0	0	99821	0	0	0	1	0	Inf	TP53	macs2	1	1.6598853897054346e-4
ENSG00000141510	TP53	EXP051014	LOXIMVI	5	882	0	0	99821	13	1.3023311727993107e-4	0	1	0	8191.999999985097	TP53	macs2	1	1.6598853897054346e-4
ENSG00000141510	TP53	EXP051015	UO31	5	2200	0	0	99821	45	4.508069444305306e-4	0	1	0	2596.5397390878575	TP53	macs2	1	1.6598853897054346e-4
ENSG00000141510	TP53	EXP051016	A498	5	1653	0	0	99821	41	4.107352160367057e-4	0	1	0	2927.935349038866	TP53	macs2	1	1.6598853897054346e-4
ENSG00000141510	TP53	EXP051017	U2OS (osteosarcoma)	5	926	0	0	99821	31	3.1055589505214336e-4	0	1	0	3242.890102307148	TP53	macs2	1	1.6598853897054346e-4
ENSG00000141510	TP53	EXP051018	SK-MEL-5 (Cutaneous melanoma)	5	185	0	0	99821	4	4.007172839382495e-5	0	1	0	4503599627370496	TP53	macs2	1	1.6598853897054346e-4
ENSG00000141510	TP53	EXP051019	MALME3	5	172	0	0	99821	1	1.0017932098456237e-5	0	1	0	4503599627370496	TP53	macs2	1	1.6598853897054346e-4
ENSG00000141510	TP53	EXP051020	NCI-H460 (Large cell lung carcinoma)	5	858	0	0	99821	33	3.305917592490558e-4	0	1	0	3204.0403799853193	TP53	macs2	1	1.6598853897054346e-4
ENSG00000141510	TP53	EXP051021	A549 (lung carcinoma)	5	2271	1	0.2	99821	81	8.114524999749552e-4	306.8102788185978	0.004100486532880719	6.175245731996962	3521.4133752918374	TP53	macs2	0.03997974369558701	1.6598853897054346e-4
ENSG00000141510	TP53	EXP051022	HCT-116 (colon carcinoma)	5	1079	0	0	99821	32	3.205738271505996e-4	0	0.9999999999999999	0	3321.152277177515	TP53	macs2	1	1.6598853897054346e-4
ENSG00000141510	TP53	EXP051023	UACC62	5	253	0	0	99821	4	4.007172839382495e-5	0	1	0	4503599627370496	TP53	macs2	1	1.6598853897054346e-4
ENSG00000141510	TP53	EXP051024	UACC257	5	1210	0	0	99821	43	4.307710802336182e-4	0	1	0	2745.9021841069925	TP53	macs2	1	1.6598853897054346e-4
ENSG00000141510	TP53	EXP051025	UACC257	5	698	0	0	99821	24	2.4043037036294967e-4	0	1	0	6316.342609819675	TP53	macs2	1	1.6598853897054346e-4
ENSG00000141510	TP53	EXP051026	RPE	5	470	0	0	99821	10	1.0017932098456237e-4	0	0.9999999999999999	0	16383.999999940395	TP53	macs2	1	1.6598853897054346e-4
ENSG00000141510	TP53	EXP054819	IMR90 (lung fibroblasts)	5	594	1	0.2	99821	22	2.203945061660372e-4	1120.5010996085664	0.0011514968240447716	22.03968271271901	16383.999999940395	TP53	macs2	0.022454188068873046	1.6598853897054346e-4
ENSG00000141510	TP53	EXP054820	IMR90 (lung fibroblasts)	5	8004	2	0.4	99821	469	0.004698410154175975	141.68099562267736	2.2006454859458012e-4	11.760549188356878	1258.9122270068406	TP53	macs2	0.008582517395188624	1.6598853897054346e-4
ENSG00000141510	TP53	EXP057959	foreskin fibroblast	5	1715	0	0	99821	6	6.010759259073742e-5	0	1	0	16383.999999940395	TP53	macs2	1	1.6598853897054346e-4
ENSG00000141510	TP53	EXP057960	foreskin fibroblast	5	3965	0	0	99821	55	5.509862654150931e-4	0	1	0	1984.6969779139415	TP53	macs2	1	1.6598853897054346e-4
ENSG00000141510	TP53	EXP057963	MCF10A (breast epithelial cells)	5	7323	0	0	99821	106	0.001061900802436361	0	0.9999999999999999	0	1018.2132355385794	TP53	macs2	1	1.6598853897054346e-4
ENSG00000141510	TP53	EXP057964	MCF10A (breast epithelial cells)	5	33253	1	0.2	99821	1187	0.011891285400867552	20.769592888995227	0.05810515880391596	0.4214732746211182	209.90332050284778	TP53	macs2	0.21930011548574735	1.6598853897054346e-4
ENSG00000141510	TP53	EXP057969	foreskin fibroblast	5	362	0	0	99821	0	0	0	1	0	Inf	TP53	macs2	1	1.6598853897054346e-4
ENSG00000136870	ZNF189	EXP040240	HEK293 (embryonic kidney)	2	26282	2	1	99705	1788	0.017932902061080187	Inf	3.2211906410827365e-4	10.27541952476349	Inf	ZNF189	macs2	3.2211906410827365e-4	3.2211906410827365e-4
ENSG00000198131	ZNF544	EXP039714	HEK293 (embryonic kidney)	67	352	1	0.014925373134328358	99794	3	3.006192757079584e-5	508.38829837499316	0.002681070921666352	9.458184328285434	8191.999999985097	ZNF544	macs2	0.002681070921666352	0.002681070921666352
ENSG00000162086	ZNF75A	EXP038548	K562 (myelogenous leukemia)	28	4915	4	0.14285714285714285	99793	1777	0.017806860200615275	9.192319495568846	0.0014692405509223385	2.315880999495976	26.779208737223392	ZNF75A	macs2	0.002938481101844677	0.002938481101844677
ENSG00000162086	ZNF75A	EXP038566	MCF7 (Invasive ductal breast carcinoma)	28	2686	0	0	99793	1224	0.012265389355966851	0	1	0	11.359193281252718	ZNF75A	macs2	1	0.002938481101844677
ENSG00000169981	ZNF35	EXP035876	HEK293 (embryonic kidney)	3	92275	2	0.6666666666666666	99710	4296	0.04308494634439876	44.41334133282949	0.005412487543948158	2.3116792872134337	2567.507627493386	ZNF35	macs2	0.005412487543948158	0.005412487543948158
ENSG00000125945	ZNF436	EXP035932	HEK293 (embryonic kidney)	3	4790	1	0.3333333333333333	91106	197	0.0021623164226285863	230.01819149667998	0.006505576104248537	3.8913496042324627	4881.702760464849	ZNF436	macs2	0.006505576104248537	0.006505576104248537
ENSG00000250571	GLI4	EXP035875	HEK293 (embryonic kidney)	2	3198	1	0.5	99719	209	0.002095889449352681	474.4878235974368	0.004207337146933566	6.036667643230058	4503599627370496	GLI4	macs2	0.008414674293867132	0.008414674293867132
ENSG00000250571	GLI4	EXP039882	HEK293 (embryonic kidney)	2	310	0	0	99719	44	4.4123988407424866e-4	0	1	0	16383.999999940395	GLI4	macs2	1	0.008414674293867132
ENSG00000130844	ZNF331	EXP035968	HEK293 (embryonic kidney)	9	3604	1	0.1111111111111111	99799	132	0.0013226585436727824	94.24075456519796	0.011929774910470724	2.1112148558706996	727.4030327821619	ZNF331	macs2	0.023859549820941447	0.023859549820941447
ENSG00000130844	ZNF331	EXP040318	HEK293 (embryonic kidney)	9	24	0	0	99799	1	1.0020140482369563e-5	0	1.0000000000000002	0	4503599627370496	ZNF331	macs2	1	0.023859549820941447
ENSG00000113916	BCL6	EXP000233	JURL-MK1 (chronic myelogenous leukemia)	135	87855	3	0.022222222222222223	99739	4287	0.042982183498932215	0.5060299765404258	0.29176111541705685	0.10299613154041298	1.5124943340889525	BCL6	macs2	1	0.03416086887181719
ENSG00000113916	BCL6	EXP030273	LoVo (colorectal adenocarcinoma)	135	20325	2	0.014814814814814815	99739	4551	0.04562909192993714	0.31452617916634157	0.09667805884895227	0.037689492500573255	1.1593575324463832	BCL6	macs2	0.6122943727100311	0.03416086887181719
ENSG00000113916	BCL6	EXP030548	germinal center B-cells	135	35596	5	0.037037037037037035	99739	5464	0.05478298358716249	0.6636025638092646	0.4517441508442002	0.21181240965161346	1.5896998307209123	BCL6	macs2	0.9536820962266448	0.03416086887181719
ENSG00000113916	BCL6	EXP031049	OCI-LY1 (diffuse large B-cell lymphoma)	135	15118	2	0.014814814814814815	99739	868	0.00870271408375861	1.712864673922358	0.3289940452106107	0.20497196788140631	6.3278107549135445	BCL6	macs2	1	0.03416086887181719
ENSG00000113916	BCL6	EXP031934	OCI-LY7 (diffuse large B-cell lymphoma)	135	8031	1	0.007407407407407408	99739	784	0.00786051594662068	0.9419267567404569	1	0.023643278675540922	5.353289585733939	BCL6	macs2	1	0.03416086887181719
ENSG00000113916	BCL6	EXP032103	OCI-LY1 (diffuse large B-cell lymphoma)	135	28322	1	0.007407407407407408	99739	2290	0.022959925405307852	0.3175513985075173	0.38087356625136964	0.007980843973468803	1.801566046829021	BCL6	macs2	1	0.03416086887181719
ENSG00000113916	BCL6	EXP033760	ICN12 (primary pre-B acute lymphomablastic leukemia)	135	5813	0	0	99739	102	0.0010226691665246293	0	1	0	27.56212130042975	BCL6	macs2	1	0.03416086887181719
ENSG00000113916	BCL6	EXP033808	CD4+ T-cells	135	31830	2	0.014814814814814815	99739	5532	0.055464763031512244	0.256084169196899	0.03609398505072544	0.030691713641289916	0.9438752774082916	BCL6	macs2	0.3428928579818917	0.03416086887181719
ENSG00000113916	BCL6	EXP034878	germinal center B-cells	135	35773	3	0.022222222222222223	99739	3578	0.035873630174756116	0.6108092361099682	0.6384482643428576	0.12431248793499276	1.8258942291520437	BCL6	macs2	1	0.03416086887181719
ENSG00000113916	BCL6	EXP034879	germinal center B-cells	135	28020	2	0.014814814814814815	99739	1876	0.01880909172941377	0.7844492722391373	1	0.09395539537494157	2.8938967316801576	BCL6	macs2	1	0.03416086887181719
ENSG00000113916	BCL6	EXP039932	HepG2 (hepatoblastoma)	135	131573	16	0.11851851851851852	99739	14998	0.15037247215231755	0.7596869606299677	0.3366241226101035	0.42048349380721156	1.285777649439513	BCL6	macs2	1	0.03416086887181719
ENSG00000113916	BCL6	EXP040594	OCI-LY1 (diffuse large B-cell lymphoma)	135	229	0	0	99739	0	0	0	1	0	Inf	BCL6	macs2	1	0.03416086887181719
ENSG00000113916	BCL6	EXP040595	OCI-LY1 (diffuse large B-cell lymphoma)	135	295	0	0	99739	25	2.506542074815268e-4	0	1	0	118.73267111491937	BCL6	macs2	1	0.03416086887181719
ENSG00000113916	BCL6	EXP040596	OCI-LY1 (diffuse large B-cell lymphoma)	135	11267	0	0	99739	203	0.0020353121647499976	0	1	0	13.70075131647006	BCL6	macs2	1	0.03416086887181719
ENSG00000113916	BCL6	EXP048668	A549 (lung carcinoma)	135	68	0	0	99739	11	1.1028785129187179e-4	0	1	0	296.0080916227484	BCL6	macs2	1	0.03416086887181719
ENSG00000113916	BCL6	EXP048669	A549 (lung carcinoma)	135	43	0	0	99739	9	9.023551469334965e-5	0	0.9999999999999999	0	376.42658414476875	BCL6	macs2	1	0.03416086887181719
ENSG00000113916	BCL6	EXP052976	OCI-LY1 (diffuse large B-cell lymphoma)	135	13975	0	0	99739	703	0.007048396314380533	0	1	0	3.912674055818635	BCL6	macs2	1	0.03416086887181719
ENSG00000113916	BCL6	EXP052977	OCI-LY1 (diffuse large B-cell lymphoma)	135	6480	1	0.007407407407407408	99739	403	0.004040545824602212	1.839530762218497	0.42164285768394866	0.04611814431911743	10.48134724896515	BCL6	macs2	1	0.03416086887181719
ENSG00000113916	BCL6	EXP053301	SU-DHL-4 (diffuse large B-cell lymphoma)	135	88600	4	0.02962962962962963	99739	10471	0.10498400826156268	0.2603153315491177	0.001797940466937747	0.06990293680534092	0.6827521474970569	BCL6	macs2	0.03416086887181719	0.03416086887181719
ENSG00000165702	GFI1B	EXP032457	CD34+ hematopoietic stem cells-derived proerythroblasts	14	3687	0	0	99884	90	9.010452124464379e-4	0	1	0	337.6791528044032	GFI1B	macs2	1	0.06288503280495952
ENSG00000165702	GFI1B	EXP039926	HEK293 (embryonic kidney)	14	3821	1	0.07142857142857142	99884	112	0.0011213007088222338	68.48041580295056	0.01572125820123988	1.5983059694093178	466.9448706783586	GFI1B	macs2	0.06288503280495952	0.06288503280495952
ENSG00000165702	GFI1B	EXP058267	K562 (myelogenous leukemia)	14	13947	0	0	99884	1221	0.012224180048856673	0	1	0	24.391578477157893	GFI1B	macs2	1	0.06288503280495952
ENSG00000165702	GFI1B	EXP058268	K562 (myelogenous leukemia)	14	10638	1	0.07142857142857142	99884	1033	0.010341996716190781	7.36150380049127	0.13555922820068833	0.17304391181100898	49.09662567448229	GFI1B	macs2	0.27111845640137666	0.06288503280495952
ENSG00000165702	GFI1B	EXP058347	SET2 (Adult acute megakaryoblastic leukemia, Homo Sapiens)	14	4476	1	0.07142857142857142	99884	170	0.001701974290176605	45.10628010739125	0.02370114913566837	1.0555870344158742	303.1734208129602	GFI1B	macs2	0.06320306436178232	0.06288503280495952
ENSG00000165702	GFI1B	EXP058349	SET2 (Adult acute megakaryoblastic leukemia, Homo Sapiens)	14	2242	1	0.07142857142857142	99884	89	8.910335989748108e-4	86.15501404563811	0.01254008122124539	2.0073973035680877	591.5739240154547	GFI1B	macs2	0.10032064976996312	0.06288503280495952
ENSG00000165702	GFI1B	EXP058351	SET2 (Adult acute megakaryoblastic leukemia, Homo Sapiens)	14	1580	0	0	99884	37	3.704296984502022e-4	0	1	0	833.8778353741307	GFI1B	macs2	1	0.06288503280495952
ENSG00000165702	GFI1B	EXP058353	SET2 (Adult acute megakaryoblastic leukemia, Homo Sapiens)	14	1916	0	0	99884	65	6.507548756557607e-4	0	1	0	479.117876439423	GFI1B	macs2	1	0.06288503280495952
ENSG00000184517	ZFP1	EXP039820	HepG2 (hepatoblastoma)	29	77122	6	0.20689655172413793	99887	11828	0.11841380760259093	1.942233918827046	0.14660065241404444	0.6467349457996513	4.908229012017215	ZFP1	macs2	0.14660065241404444	0.14660065241404444
ENSG00000167562	ZNF701	EXP038565	MCF7 (Invasive ductal breast carcinoma)	5	20290	1	0.2	99766	2649	0.02655213198885392	9.164850909895573	0.12593664338656868	0.18604036230896331	92.70137375036025	ZNF701	macs2	0.25187328677313736	0.25187328677313736
ENSG00000167562	ZNF701	EXP039543	HEK293 (embryonic kidney)	5	277	0	0	99766	26	2.606098269951687e-4	0	1	0	5630.88483329409	ZNF701	macs2	1	0.25187328677313736
ENSG00000131196	NFATC1	EXP010939	GM12878 (female B-cells lymphoblastoid cell line)	6	66067	1	0.16666666666666666	99804	10777	0.10798164402228368	1.6521478454428837	0.49623900118302494	0.03492811558759464	14.767019753428729	NFATC1	macs2	0.6616520015773666	0.2670836201272435
ENSG00000131196	NFATC1	EXP030172	LoVo (colorectal adenocarcinoma)	6	420	0	0	99804	11	1.1021602340587552e-4	0	1	0	8191.999999985097	NFATC1	macs2	1	0.2670836201272435
ENSG00000131196	NFATC1	EXP030876	HUVEC-C (HUVEC, umbilical vein endothelial cells)	6	30099	2	0.3333333333333333	99804	15114	0.15143681615967297	2.8017855307082535	0.22691841772367613	0.25341074376376976	19.549819344935273	NFATC1	macs2	0.45383683544735226	0.2670836201272435
ENSG00000131196	NFATC1	EXP030877	HUVEC-C (HUVEC, umbilical vein endothelial cells)	6	30565	3	0.5	99804	17088	0.1712155825417819	4.840553771710461	0.06677090503181088	0.6482671332830818	36.1406525819958	NFATC1	macs2	0.2670836201272435	0.2670836201272435
ENSG00000137265	IRF4	EXP010392	GM12878 (female B-cells lymphoblastoid cell line)	3	40637	0	0	33538	2124	0.06333114675890035	0	1	0	35.80452615218399	IRF4	macs2	1	0.3015376923457747
ENSG00000137265	IRF4	EXP010393	GM12878 (female B-cells lymphoblastoid cell line)	3	62853	0	0	33538	2508	0.07478084560796708	0	1	0	29.940214517145193	IRF4	macs2	1	0.3015376923457747
ENSG00000137265	IRF4	EXP030387	LoVo (colorectal adenocarcinoma)	3	130	0	0	33538	0	0	0	1	0	Inf	IRF4	macs2	1	0.3015376923457747
ENSG00000137265	IRF4	EXP033012	OCI-LY3 (diffuse large B-cell lymphoma)	3	6255	0	0	33538	180	0.00536704633550003	0	0.9999999999999999	0	448.2723765030557	IRF4	macs2	1	0.3015376923457747
ENSG00000137265	IRF4	EXP033016	OCI-LY10 (diffuse large B-cell lymphoma)	3	9752	1	0.3333333333333333	33538	585	0.017442900590375097	28.163334501624078	0.051504581911959	0.47658720675889965	540.0561328181749	IRF4	macs2	0.463541237207631	0.3015376923457747
ENSG00000137265	IRF4	EXP033022	OCI-LY3 (diffuse large B-cell lymphoma)	3	10413	0	0	33538	28	8.348738744111158e-4	0	1	0	3181.336642094526	IRF4	macs2	1	0.3015376923457747
ENSG00000137265	IRF4	EXP033025	OCI-LY3 (diffuse large B-cell lymphoma)	3	1797	0	0	33538	9	2.683523167750015e-4	0	1	0	8191.999999985097	IRF4	macs2	1	0.3015376923457747
ENSG00000137265	IRF4	EXP049465	KK1 (Adult T acute lymphoblastic leukemia)	3	4949	0	0	33538	11	3.2798616494722407e-4	0	1	0	8191.999999985097	IRF4	macs2	1	0.3015376923457747
ENSG00000137265	IRF4	EXP054457	MM1.S (plasma cell myeloma)	3	86329	3	1	33538	13621	0.4061363229769217	Inf	0.06700837607683882	0.6041424518638817	Inf	IRF4	macs2	0.3015376923457747	0.3015376923457747
ENSG00000112592	TBP	EXP010218	GM12878 (female B-cells lymphoblastoid cell line)	2	7278	0	0	91106	2633	0.02890040172985314	0	1	0	179.037592054589	TBP	macs2	1	0.3675167600490233
ENSG00000112592	TBP	EXP010372	K562 (myelogenous leukemia)	2	28132	1	0.5	91106	12760	0.14005663732355716	6.139783057052928	0.26051232458508283	0.07821319985609472	480.00963004060173	TBP	macs2	0.45589656802389494	0.3675167600490233
ENSG00000112592	TBP	EXP010430	WA01 (H1, human embryonic stem cells)	2	32599	1	0.5	91106	19186	0.2105898623581323	3.7486278469152428	0.3768434897138485	0.047751843857534254	293.5480442322083	TBP	macs2	0.4396507379994899	0.3675167600490233
ENSG00000112592	TBP	EXP010453	HeLa S3 (cervical adenocarcinoma)	2	31939	1	0.5	91106	9705	0.10652426843457072	8.385912520785459	0.20171759668787034	0.10684089993618702	654.6604215543133	TBP	macs2	0.7060115884075462	0.3675167600490233
ENSG00000112592	TBP	EXP010749	HepG2 (hepatoblastoma)	2	27612	1	0.5	91106	12866	0.1412201172260883	6.0809662828355435	0.26251197146358807	0.07746391995265206	475.43076854934634	TBP	macs2	0.3675167600490233	0.3675167600490233
ENSG00000112592	TBP	EXP032023	ME-1 (acute myeloid leukemia )	2	33893	1	0.5	91106	9126	0.10016903387263187	8.98283276299177	0.1903210175030641	0.11442685914675911	700.8440000528626	TBP	macs2	1	0.3675167600490233
ENSG00000112592	TBP	EXP033221	K562 (myelogenous leukemia)	2	127522	1	0.5	91106	10912	0.11977257260773165	7.35026282099451	0.22521552730559496	0.09361506559208023	574.0440772357754	TBP	macs2	0.5255028970463883	0.3675167600490233
ENSG00000141568	FOXK2	EXP037567	MCF7 (Invasive ductal breast carcinoma)	2	20	0	0	99707	5	5.014693050638371e-5	0	1	0	4503599627370496	FOXK2	macs2	1	0.5833495691501863
ENSG00000141568	FOXK2	EXP039363	HepG2 (hepatoblastoma)	2	13309	0	0	99707	1649	0.016538457681005345	0	1	0	316.9269532615072	FOXK2	macs2	1	0.5833495691501863
ENSG00000141568	FOXK2	EXP039455	K562 (myelogenous leukemia)	2	27024	0	0	99707	4240	0.04252459706941338	0	1	0	119.92070544783746	FOXK2	macs2	1	0.5833495691501863
ENSG00000141568	FOXK2	EXP039520	HEK293T (embryonic kidney)	2	269	0	0	99707	48	4.8141053286128357e-4	0	1	0	16383.999999940395	FOXK2	macs2	1	0.5833495691501863
ENSG00000141568	FOXK2	EXP039631	MCF7 (Invasive ductal breast carcinoma)	2	2646	0	0	99707	154	0.001544525459596618	0	1.0000000000000002	0	3633.72199995846	FOXK2	macs2	1	0.5833495691501863
ENSG00000141568	FOXK2	EXP039902	K562 (myelogenous leukemia)	2	44635	1	0.5	99707	4244	0.042564714613818486	22.491512838123743	0.08333565273574091	0.28648764707331115	1737.1471455893027	FOXK2	macs2	0.5833495691501863	0.5833495691501863
ENSG00000141568	FOXK2	EXP039999	GM12878 (female B-cells lymphoblastoid cell line)	2	6095	0	0	99707	693	0.006950364568184781	0	1	0	744.0833589150753	FOXK2	macs2	1	0.5833495691501863
ENSG00000181007	ZFP82	EXP035912	HEK293 (embryonic kidney)	2	738	0	0	99870	3	3.0039050765995796e-5	0	0.9999999999999999	0	4503599627370496	ZFP82	macs2	0.9999999999999999	0.9999999999999999
ENSG00000189190	ZNF600	EXP039418	HEK293 (embryonic kidney)	11	101725	1	0.09090909090909091	99864	10141	0.10154810542337579	0.8847446908621113	0.9999999999999999	0.020385114931281815	6.220680461471213	ZNF600	macs2	0.9999999999999999	0.9999999999999999
ENSG00000177030	DEAF1	EXP040170	K562 (myelogenous leukemia)	3	4145	0	0	91106	2192	0.024059886286303865	0	0.9999999999999999	0	98.33548407675697	DEAF1	macs2	0.9999999999999999	0.9999999999999999
ENSG00000018869	ZNF582	EXP035961	HEK293 (embryonic kidney)	6	622	0	0	99736	20	2.0052939760968958e-4	0	0.9999999999999999	0	6010.95070230647	ZNF582	macs2	0.9999999999999999	0.9999999999999999
ENSG00000181444	ZNF467	EXP035905	HEK293 (embryonic kidney)	6	40551	0	0	99709	7655	0.0767734106249185	0	0.9999999999999999	0	10.21557152421314	ZNF467	macs2	0.9999999999999999	0.9999999999999999
ENSG00000127124	HIVEP3	EXP030130	LoVo (colorectal adenocarcinoma)	2	8	0	0	99914	1	1.0008607402366034e-5	0	0.9999999999999999	0	4503599627370496	HIVEP3	macs2	0.9999999999999999	0.9999999999999999
ENSG00000142528	ZNF473	EXP044736	HEK293 (embryonic kidney)	2	74	0	0	91106	1	1.097622549557658e-5	0	0.9999999999999999	0	4503599627370496	ZNF473	macs2	0.9999999999999999	0.9999999999999999
ENSG00000188785	ZNF548	EXP039764	HEK293 (embryonic kidney)	20	626	0	0	99740	28	2.807298977341087e-4	0	0.9999999999999999	0	767.1916491233197	ZNF548	macs2	0.9999999999999999	0.9999999999999999
ENSG00000256223	ZNF10	EXP039458	HEK293 (embryonic kidney)	3	5427	0	0	99708	395	0.003961567777911502	0	0.9999999999999999	0	607.1407085622932	ZNF10	macs2	0.9999999999999999	0.9999999999999999
ENSG00000185022	MAFF	EXP010544	HepG2 (hepatoblastoma)	3	88496	0	0	99689	1616	0.016210414388749008	0	1	0	146.72397691265613	MAFF	macs2	1	1
ENSG00000185022	MAFF	EXP030328	LoVo (colorectal adenocarcinoma)	3	8	0	0	99689	0	0	0	1	0	Inf	MAFF	macs2	1	1
ENSG00000185022	MAFF	EXP039521	HeLa S3 (cervical adenocarcinoma)	3	71461	0	0	99689	7785	0.07809286882203653	0	1	0	28.57074161132555	MAFF	macs2	1	1
ENSG00000105136	ZNF419	EXP035924	HEK293 (embryonic kidney)	6	272	0	0	99903	0	0	0	1	0	Inf	ZNF419	macs2	1	1
ENSG00000125618	PAX8	EXP036305	FT33 (fallopian tube secretory cells)	4	4	0	0	99752	0	0	0	1	0	Inf	PAX8	macs2	1	1
ENSG00000125618	PAX8	EXP036307	FT246 (fallopian tube secretory cells)	4	273	0	0	99752	5	5.0124308284545674e-5	0	0.9999999999999999	0	4503599627370496	PAX8	macs2	1	1
ENSG00000125618	PAX8	EXP036308	KURAMOCHI (high grade ovarian serous adenocarcinoma)	4	17	0	0	99752	0	0	0	1	0	Inf	PAX8	macs2	1	1
ENSG00000125618	PAX8	EXP036310	JHOS4 (high grade ovarian serous adenocarcinoma)	4	4	0	0	99752	0	0	0	1	0	Inf	PAX8	macs2	1	1
ENSG00000125618	PAX8	EXP039335	MCF7 (Invasive ductal breast carcinoma)	4	1127	0	0	99752	53	5.313176678161841e-4	0	1	0	3146.1529087575877	PAX8	macs2	1	1
ENSG00000125618	PAX8	EXP040289	GM12878 (female B-cells lymphoblastoid cell line)	4	1004	0	0	99752	75	7.518646242681851e-4	0	1	0	1960.0427540061642	PAX8	macs2	1	1
ENSG00000109381	ELF2	EXP030047	LoVo (colorectal adenocarcinoma)	19	7608	1	0.05263157894736842	99737	5598	0.056127615629104545	0.9342522517957298	1	0.022419265504024177	5.919324773095398	ELF2	macs2	1	1
ENSG00000105717	PBX4	EXP049801	PC3(bone mets prostate adenocarcinoma)	13	197435	0	0	99858	4648	0.046546095455546874	0	1	0	6.724682615781656	PBX4	macs2	1	1
ENSG00000166261	ZNF202	EXP039697	HEK293 (embryonic kidney)	95	789	0	0	99664	113	0.001133809600256863	0	1	0	35.454304831384825	ZNF202	macs2	1	1
ENSG00000182141	ZNF708	EXP035878	HEK293 (embryonic kidney)	13	1528	0	0	99827	28	2.804852394642732e-4	0	1	0	1255.5628670857695	ZNF708	macs2	1	1
ENSG00000070476	ZXDC	EXP038567	MCF7 (Invasive ductal breast carcinoma)	3	23186	0	0	99868	968	0.009692794488725117	0	1	0	246.02763409675683	ZXDC	macs2	1	1
ENSG00000188171	ZNF626	EXP040260	HEK293 (embryonic kidney)	9	286	0	0	99825	6	6.010518407212622e-5	0	1	0	16383.999999940395	ZNF626	macs2	1	1
ENSG00000188295	ZNF669	EXP035923	HEK293 (embryonic kidney)	4	648	0	0	99859	16	1.6022591854514867e-4	0	1	0	8191.999999985097	ZNF669	macs2	1	1
ENSG00000133794	ARNTL	EXP030303	LoVo (colorectal adenocarcinoma)	5	2057	0	0	99797	1359	0.013617643816948405	0	1	0	79.07618382426475	ARNTL	macs2	1	1
ENSG00000133794	ARNTL	EXP033309	U2OS (osteosarcoma)	5	9563	0	0	99797	473	0.004739621431505957	0	1	0	229.52132343292473	ARNTL	macs2	1	1
ENSG00000133794	ARNTL	EXP035003	U2OS (osteosarcoma)	5	414	0	0	99797	76	7.61545938254657e-4	0	1	0	1372.6245584676058	ARNTL	macs2	1	1
ENSG00000133794	ARNTL	EXP035220	NOMO-1 (acute monocytic leukemia)	5	3	0	0	99797	0	0	0	1	0	Inf	ARNTL	macs2	1	1
ENSG00000133794	ARNTL	EXP035225	THP-1 (acute monocytic leukemia)	5	1026	0	0	99797	74	7.41505255669008e-4	0	1.0000000000000002	0	1504.6353493878826	ARNTL	macs2	1	1
ENSG00000133794	ARNTL	EXP035227	THP-1 (acute monocytic leukemia)	5	311	0	0	99797	26	2.605288736134353e-4	0	1	0	5633.324260265733	ARNTL	macs2	1	1
ENSG00000133794	ARNTL	EXP035229	NOMO-1 (acute monocytic leukemia)	5	116	0	0	99797	14	1.4028477809954206e-4	0	1	0	8191.999999985097	ARNTL	macs2	1	1
ENSG00000133794	ARNTL	EXP035645	U2OS (osteosarcoma)	5	1923	0	0	99797	258	0.0025852480535487037	0	1	0	422.1513604349764	ARNTL	macs2	1	1
ENSG00000133794	ARNTL	EXP035646	U2OS (osteosarcoma)	5	1030	0	0	99797	256	0.002565207370963055	0	1	0	425.4779496985132	ARNTL	macs2	1	1
ENSG00000133794	ARNTL	EXP036553	U2OS (osteosarcoma)	5	93669	0	0	99797	1409	0.014118660881589628	0	1	0	76.24036022284746	ARNTL	macs2	1	1
ENSG00000133794	ARNTL	EXP036554	U2OS (osteosarcoma)	5	63962	0	0	99797	680	0.006813832079120615	0	1	0	159.38595603110875	ARNTL	macs2	1	1
ENSG00000133794	ARNTL	EXP036555	U2OS (osteosarcoma)	5	47486	0	0	99797	429	0.004298726414621682	0	0.9999999999999999	0	253.1656366782548	ARNTL	macs2	1	1
ENSG00000133794	ARNTL	EXP036556	U2OS (osteosarcoma)	5	66549	0	0	99797	752	0.007535296652203974	0	1.0000000000000002	0	144.27495783782433	ARNTL	macs2	1	1
ENSG00000117139	KDM5B	EXP031116	WA01 (H1, human embryonic stem cells)	54	73	0	0	99794	4	4.0082570094394456e-5	0	0.9999999999999999	0	3073.494141026732	KDM5B	macs2	1	1
ENSG00000117139	KDM5B	EXP031118	K562 (myelogenous leukemia)	54	33468	9	0.16666666666666666	99794	10297	0.10318255606549492	1.7382954451827697	0.12030395401644828	0.7468651812791326	3.602308974380004	KDM5B	macs2	1	1
ENSG00000117139	KDM5B	EXP032626	MCF7 (Invasive ductal breast carcinoma)	54	20239	0	0	99794	2990	0.029961721145559853	0	0.4130353115656209	0	2.290511973835064	KDM5B	macs2	1	1
ENSG00000117139	KDM5B	EXP032627	MCF7 (Invasive ductal breast carcinoma)	54	20443	0	0	99794	3559	0.035663466741487466	0	0.26687682478906366	0	1.9127235270034797	KDM5B	macs2	1	1
ENSG00000117139	KDM5B	EXP032628	MCF7 (Invasive ductal breast carcinoma)	54	31989	0	0	99794	5853	0.05865082069062268	0	0.07580251524477674	0	1.1350855001080649	KDM5B	macs2	1	1
ENSG00000117139	KDM5B	EXP032629	T47D (invasive ductal carcinoma)	54	52733	4	0.07407407407407407	99794	8186	0.08202897969817825	0.8952609964880279	1	0.23474914425286653	2.439658215585716	KDM5B	macs2	1	1
ENSG00000117139	KDM5B	EXP032630	SUM185PE (ductal breast carcinoma)	54	18600	0	0	99794	1265	0.012676112792352246	0	1	0	5.513566597936139	KDM5B	macs2	1	1
ENSG00000117139	KDM5B	EXP032631	SUM185PE (ductal breast carcinoma)	54	56747	7	0.12962962962962962	99794	12403	0.1242860292201936	1.0494090203040092	0.8370372197644553	0.40008340568333906	2.336986669752367	KDM5B	macs2	1	1
ENSG00000117139	KDM5B	EXP032632	SUM159PT (Triple negative breast cancer)	54	45397	3	0.05555555555555555	99794	4133	0.04141531555003307	1.3614898404261842	0.49024103674524855	0.27168637299293696	4.212365725822186	KDM5B	macs2	1	1
ENSG00000117139	KDM5B	EXP032634	MDA-MB-231 (breast adenocarcinoma)	54	106744	9	0.16666666666666666	99794	14915	0.14945788323947332	1.1381363952395285	0.702395819634998	0.4890685031441595	2.3584061989175726	KDM5B	macs2	1	1
ENSG00000117139	KDM5B	EXP032635	HCC2157 (ductal breast carcinoma)	54	65221	2	0.037037037037037035	99794	4173	0.04181614125097701	0.8813160057787435	1	0.10394340069028915	3.349670824833608	KDM5B	macs2	1	1
ENSG00000117139	KDM5B	EXP036847	WA01 (H1, human embryonic stem cells)	54	689	0	0	99794	25	2.505160630899653e-4	0	1	0	300.44216399500306	KDM5B	macs2	1	1
ENSG00000117139	KDM5B	EXP036848	CUTLL1 (T-cell lymphoblastic lymphoma 1)	54	605	0	0	99794	2	2.0041285047197228e-5	0	0.9999999999999999	0	8191.999999985097	KDM5B	macs2	1	1
ENSG00000117139	KDM5B	EXP039760	WA01 (H1, human embryonic stem cells)	54	19	0	0	99794	1	1.0020642523598614e-5	0	0.9999999999999999	0	4503599627370496	KDM5B	macs2	1	1
ENSG00000117139	KDM5B	EXP048759	MCF7 (Invasive ductal breast carcinoma)	54	62	0	0	99794	2	2.0041285047197228e-5	0	0.9999999999999999	0	8191.999999985097	KDM5B	macs2	1	1
ENSG00000117139	KDM5B	EXP054053	WA01 (H1, human embryonic stem cells)	54	887	0	0	99794	31	3.10639918231557e-4	0	1	0	239.67757453663583	KDM5B	macs2	1	1
ENSG00000117139	KDM5B	EXP054087	K562 (myelogenous leukemia)	54	42014	2	0.037037037037037035	99794	9235	0.0925406337054332	0.37715872739406764	0.23552936381908748	0.04449348049298104	1.4330371481229134	KDM5B	macs2	1	1
ENSG00000196867	ZFP28	EXP035958	HEK293 (embryonic kidney)	15	3804	0	0	99803	21	2.1041451659769748e-4	0	1	0	1407.5373828367128	ZFP28	macs2	1	1
ENSG00000186448	ZNF197	EXP040004	K562 (myelogenous leukemia)	3	11353	0	0	99845	426	0.004266613250538335	0	1.0000000000000002	0	564.4673688231859	ZNF197	macs2	1	1
ENSG00000162367	TAL1	EXP000226	Jurkat (T-cells)	2	810	0	0	99733	12	1.2032125775821443e-4	0	1	0	4503599627370496	TAL1	macs2	1	1
ENSG00000162367	TAL1	EXP000227	proerythroblasts	2	5572	0	0	99733	141	0.0014137747786590197	0	0.9999999999999999	0	4009.1668833566428	TAL1	macs2	1	1
ENSG00000162367	TAL1	EXP000355	megakaryocytes	2	1640	0	0	99733	72	7.219275465492865e-4	0	0.9999999999999999	0	7510.833333070453	TAL1	macs2	1	1
ENSG00000162367	TAL1	EXP000613	CD133+ umbilical cord blood cells	2	12	0	0	99733	0	0	0	1	0	Inf	TAL1	macs2	1	1
ENSG00000162367	TAL1	EXP000911	CD36+ erythroid cells	2	15399	0	0	99733	1022	0.01024736045240793	0	1	0	509.6920558731409	TAL1	macs2	1	1
ENSG00000162367	TAL1	EXP000912	CD36+ erythroid cells	2	34695	0	0	99733	2105	0.021106353965086783	0	1	0	247.18059709544093	TAL1	macs2	1	1
ENSG00000162367	TAL1	EXP000919	CD34+ hematopoietic stem cells	2	575	0	0	99733	6	6.0160628879107216e-5	0	1	0	4503599627370496	TAL1	macs2	1	1
ENSG00000162367	TAL1	EXP010081	K562 (myelogenous leukemia)	2	34174	0	0	99733	1514	0.01518053202049472	0	0.9999999999999999	0	346.67496767231285	TAL1	macs2	1	1
ENSG00000162367	TAL1	EXP030212	LoVo (colorectal adenocarcinoma)	2	50954	1	0.5	99733	21628	0.2168590135662218	3.6108873631254883	0.38670079134818064	0.046003394479898214	282.82456262328503	TAL1	macs2	1	1
ENSG00000162367	TAL1	EXP030415	Jurkat E6.1 (T-cells)	2	3827	0	0	99733	77	7.720614039485426e-4	0	1	0	7223.2106594630295	TAL1	macs2	1	1
ENSG00000162367	TAL1	EXP031153	CCRF-CEM (T acute lymphoblastic leukemia)	2	3762	0	0	99733	120	0.0012032125775821444	0	1	0	4800.536506611007	TAL1	macs2	1	1
ENSG00000162367	TAL1	EXP031154	T-cell acute lymphoblastic leukemia	2	225974	0	0	99733	2020	0.020254078389299428	0	1	0	257.81003137502205	TAL1	macs2	1	1
ENSG00000162367	TAL1	EXP031155	T-cell acute lymphoblastic leukemia	2	284051	0	0	99733	3612	0.03621669858522254	0	1	0	141.75578865364525	TAL1	macs2	1	1
ENSG00000162367	TAL1	EXP031441	CD34+ hematopoietic stem cells-derived proerythroblasts	2	519	0	0	99733	19	1.9050865811717286e-4	0	0.9999999999999999	0	4503599627370496	TAL1	macs2	1	1
ENSG00000162367	TAL1	EXP031442	CD34+ hematopoietic stem cells-derived proerythroblasts	2	3041	0	0	99733	118	0.0011831590346224419	0	0.9999999999999999	0	4891.6343564940025	TAL1	macs2	1	1
ENSG00000162367	TAL1	EXP031614	RPMI-8402 (T acute lymphoblastic leukemia)	2	7395	0	0	99733	201	0.0020153810674500916	0	1	0	2714.2755826517273	TAL1	macs2	1	1
ENSG00000162367	TAL1	EXP031973	CD34+ hematopoietic stem cells	2	1941	0	0	99733	311	0.003118325930233724	0	1	0	1730.2444920303199	TAL1	macs2	1	1
ENSG00000162367	TAL1	EXP032026	ME-1 (acute myeloid leukemia )	2	63921	0	0	99733	18186	0.18234686613257398	0	1	0	23.87768620694276	TAL1	macs2	1	1
ENSG00000162367	TAL1	EXP032456	CD34+ hematopoietic stem cells-derived proerythroblasts	2	34138	0	0	99733	695	0.006968606178496586	0	0.9999999999999999	0	742.4820589906701	TAL1	macs2	1	1
ENSG00000162367	TAL1	EXP032579	primary endothelial colony-forming cells	2	1544	0	0	99733	94	9.425165191060131e-4	0	1	0	6303.170998978624	TAL1	macs2	1	1
ENSG00000162367	TAL1	EXP032835	primary endothelial colony-forming cells	2	87638	1	0.5	99733	4996	0.050093750313336606	18.95073162730228	0.09769573409079255	0.24152311123437456	1468.424682900936	TAL1	macs2	1	1
ENSG00000162367	TAL1	EXP032836	primary endothelial colony-forming cells	2	106426	0	0	99733	4553	0.04565189054776252	0	0.9999999999999999	0	111.41434294816409	TAL1	macs2	1	1
ENSG00000162367	TAL1	EXP033282	erythroid cells	2	11863	0	0	99733	492	0.004933171568086792	0	1.0000000000000002	0	1106.957300209202	TAL1	macs2	1	1
ENSG00000162367	TAL1	EXP033283	erythroid cells	2	10223	0	0	99733	918	0.009204576218503404	0	1	0	569.5345408619906	TAL1	macs2	1	1
ENSG00000162367	TAL1	EXP033774	MOLT3 (adult T acute lymphoblastic leukemia)	2	52972	0	0	99733	5138	0.05151755186347548	0	1	0	98.23350315033039	TAL1	macs2	1	1
ENSG00000162367	TAL1	EXP033775	CD133+ umbilical cord blood cells	2	66	0	0	99733	0	0	0	1	0	Inf	TAL1	macs2	1	1
ENSG00000162367	TAL1	EXP033903	TSU-1621-MT (adult acute myeloid leukemia)	2	30555	0	0	99733	2167	0.021728013796837555	0	1	0	239.95262862217527	TAL1	macs2	1	1
ENSG00000162367	TAL1	EXP035192	fetal CD34+ hematopoietic stem progenitor cells	2	239	0	0	99733	4	4.010708591940481e-5	0	1	0	4503599627370496	TAL1	macs2	1	1
ENSG00000162367	TAL1	EXP035193	fetal proerythroblasts	2	44194	0	0	99733	1195	0.011981991918422186	0	1	0	433.4801947949989	TAL1	macs2	1	1
ENSG00000162367	TAL1	EXP035194	CD34+ hematopoietic stem progenitor cells	2	28	0	0	99733	0	0	0	1	0	Inf	TAL1	macs2	1	1
ENSG00000162367	TAL1	EXP036763	HUES64 (embryonic stem cells)	2	4783	0	0	99733	1200	0.012032125775821443	0	0.9999999999999999	0	443.28805531196656	TAL1	macs2	1	1
ENSG00000162367	TAL1	EXP036764	HUES64 (embryonic stem cells)	2	7876	0	0	99733	2148	0.021537505138720384	0	0.9999999999999999	0	242.1233653641712	TAL1	macs2	1	1
ENSG00000162367	TAL1	EXP037194	Kasumi-1 (acute myeloblastic leukemia)	2	38916	0	0	99733	13431	0.1346695677458815	0	1	0	34.214706342331105	TAL1	macs2	1	1
ENSG00000162367	TAL1	EXP039374	K562 (myelogenous leukemia)	2	29497	0	0	99733	1058	0.010608324225682572	0	0.9999999999999999	0	491.74396580889515	TAL1	macs2	1	1
ENSG00000162367	TAL1	EXP040808	K562 (myelogenous leukemia)	2	71607	0	0	99733	4514	0.045260846460048326	0	1.0000000000000002	0	112.41264971779455	TAL1	macs2	1	1
ENSG00000162367	TAL1	EXP040810	K562 (myelogenous leukemia)	2	14452	0	0	99733	319	0.0031985401020725337	0	1	0	1683.6725774364027	TAL1	macs2	1	1
ENSG00000162367	TAL1	EXP040812	K562 (myelogenous leukemia)	2	9003	0	0	99733	230	0.0023061574403657765	0	1	0	2348.529676149328	TAL1	macs2	1	1
ENSG00000162367	TAL1	EXP054824	CD34+ hematopoietic stem cells-derived proerythroblasts	2	39767	0	0	99733	1121	0.011240010828913198	0	1	0	463.14882289979886	TAL1	macs2	1	1
ENSG00000152804	HHEX	EXP030100	LoVo (colorectal adenocarcinoma)	2	3775	0	0	99696	3006	0.030151661049590755	0	1	0	171.3759672593706	HHEX	macs2	1	1
ENSG00000152804	HHEX	EXP039649	HepG2 (hepatoblastoma)	2	5262	0	0	99696	135	0.0013541165142031777	0	1	0	4206.652786426325	HHEX	macs2	1	1
ENSG00000152804	HHEX	EXP053376	CC-LP-1 (intrahepatic cholangiocarcinoma)	2	3701	0	0	99696	4	4.012197079120526e-5	0	1	0	4503599627370496	HHEX	macs2	1	1
ENSG00000160094	ZNF362	EXP039664	HEK293 (embryonic kidney)	7	11681	0	0	99826	312	0.0031254382625768838	0	1	0	221.92363823801304	ZNF362	macs2	1	1
ENSG00000215271	HOMEZ	EXP039362	HepG2 (hepatoblastoma)	11	104489	0	0	99917	3965	0.039682936837575185	0	1	0	9.64376701525767	HOMEZ	macs2	1	1
ENSG00000197566	ZNF624	EXP039529	HEK293 (embryonic kidney)	8	40	0	0	99904	0	0	0	1	0	Inf	ZNF624	macs2	1	1
ENSG00000083828	ZNF586	EXP035937	HEK293 (embryonic kidney)	9	4237	0	0	99766	12	1.2028145861315479e-4	0	1	0	6669.186678114006	ZNF586	macs2	1	1
ENSG00000198105	ZNF248	EXP039858	HEK293 (embryonic kidney)	25	1066	0	0	99782	5	5.010923813914333e-5	0	1	0	5959.31941824182	ZNF248	macs2	1	1
