# Supplementary material for: Genome-wide identification of genes regulating DNA methylation using genetic anchors for causal inference
Source: Genome Biol. 2020 Aug 28;21:220. doi: 10.1186/s13059-020-02114-z (PMC7453518; doi:10.1186/s13059-020-02114-z)
Supplement: Supplementary file 13 — Additional file 13: Table S13. Significant overlap between target CpGs and trait-associated CpGs (EWASdb, Liu et al.). [file 13059_2020_2114_MOESM13_ESM.csv]

Ensembl_ID	HGNC_ID	Trait	n_sig_probes	frac_sig_probes	frac_bg_probes	n_trait_probes	n_bg_probes	OR	conf.lower	conf.upper	p	fdr
ENSG00000109320	NFKB1	obesity	255	0.054901960784313725	0.0013071173459994845	156	108636	44.35552847236594	23.312928675248084	78.36285579160378	2.4607634216109128e-18	2.1890541271413747e-14
ENSG00000109320	NFKB1	smoking cessation	255	0.07450980392156863	0.008293751610884054	920	108636	9.62773411775967	5.667154993921641	15.461261526712743	1.1517234044339062e-12	4.7287105162815185e-9
ENSG00000109320	NFKB1	alcohol consumption	255	0.09803921568627451	0.02750469457638352	3013	108636	3.843295965282002	2.431998059958296	5.8294788083669005	6.20900117601541e-8	8.90526698358954e-5
ENSG00000109320	NFKB1	body mass index (BMI)	255	0.06666666666666667	0.01563938289333186	1716	108636	4.495723538823368	2.5694686365550634	7.3734955981457855	8.327961864192988e-7	8.890099290026015e-4
ENSG00000109320	NFKB1	lung function	255	0.0196078431372549	9.113001215066828e-4	104	108636	21.9254209477905	6.905914156625066	53.56684476646737	5.153589776903562e-6	0.004105564990182502
ENSG00000144354	CDCA7	maternal pre-pregnancy obesity	697	0.010043041606886656	0.0013719694667734777	156	108603	7.384414011006097	2.907458468141852	15.675194062727334	7.131582826089316e-5	0.03844931649924416
ENSG00000117139	KDM5B	SETD1B-related syndrome	54	0.37037037037037035	0.015396777247699675	1695	108789	37.61233935921824	20.466447471172344	67.53292892961768	1.2255647862868564e-22	2.1804840156020322e-18
ENSG00000166261	ZNF202	Kabuki syndrome (KS)	95	0.11578947368421053	0.016442561326434013	1800	108803	7.833330988637884	3.7603229657238075	14.779866341716021	5.358952372869858e-7	5.959043393790181e-4
ENSG00000172262	ZNF131	myalgic encephalomyelitis/chronic fatigue syndrome	74	0.16216216216216217	0.033958136071556615	3706	108781	5.505762321150279	2.6980438340126858	10.328784945934874	7.358739544144336e-6	0.005380448262584985
ENSG00000113916	BCL6	air pollution (NO2)	135	0.26666666666666666	0.04621539593488458	5061	108730	7.504821910500036	4.969433069917291	11.104946403261241	7.738282013409415e-18	5.900440035224678e-14
ENSG00000113916	BCL6	multiple sclerosis	135	0.22962962962962963	0.06558447530580337	7162	108730	4.24690404447342	2.745520593572036	6.400798405112202	7.706436578156762e-10	1.8696866016323506e-6
ENSG00000113916	BCL6	Crohn's disease (CD)	135	0.11851851851851852	0.017400901315184403	1908	108730	7.592904918403864	4.195083529165165	12.879130540034062	2.428617232895255e-9	4.985670954068624e-6
ENSG00000113916	BCL6	alcohol consumption	135	0.1037037037037037	0.027582084061436585	3013	108730	4.079056495497237	2.162726578402676	7.123050525470454	2.50847879578736e-5	0.015568611130831434
ENSG00000138468	SENP7	Werner syndrome	342	0.04093567251461988	0.00583648632476272	648	108627	7.270738637864871	3.9084781073691195	12.46422254566918	2.655180528143166e-8	4.441667381682328e-5
ENSG00000138468	SENP7	ancestry	342	0.0935672514619883	0.03957579607279958	4331	108627	2.504972852260218	1.6816002745033731	3.616176133351072	9.372928760463225e-6	0.0065826325340753245
ENSG00000146232	NFKBIE	smoking cessation	150	0.08666666666666667	0.008342761481645006	920	108717	11.279348175557514	5.833732411957268	20.0273645402461	6.521541777004772e-10	1.6575585349887127e-6
ENSG00000146232	NFKBIE	obesity	150	0.04	0.0013797290212202323	156	108717	30.151075408799187	10.717122801321613	68.7441996124099	9.475459782182914e-8	1.2041730139857452e-4
ENSG00000146232	NFKBIE	body mass index (BMI)	150	0.08666666666666667	0.015664523487587036	1716	108717	5.962471151760086	3.089820588695216	10.569577869519227	8.82691636272231e-7	9.237973742358888e-4
ENSG00000214548	MEG3	Kabuki syndrome (KS)	56	0.17857142857142858	0.016453869416944728	1800	108789	12.996691511190846	5.836438304236818	26.152982143226712	2.6629200227416297e-8	4.441667381682328e-5
ENSG00000214548	MEG3	Nicolaides–Baraitser syndrome (NCBRS)	56	0.07142857142857142	0.0031528922960961125	347	108789	24.323375397213226	6.3514784204657015	66.6211003856806	3.2712894535898596e-5	0.019618547706220082
ENSG00000214548	MEG3	ancestry	56	0.17857142857142858	0.0397190892461554	4331	108789	5.256137364364283	2.363165806828111	10.567865900948556	6.548652553207485e-5	0.03603446701313912
ENSG00000214548	MEG3	Klinefelter syndrome	56	0.05357142857142857	0.0014707369311235511	163	108789	38.43192580624222	7.600820904646194	120.47212857455223	8.621065640683437e-5	0.046014937857147845
ENSG00000104043	ATP8B4	body mass index (BMI)	43	0.23255813953488372	0.015681300095595263	1716	108792	19.0189380220171	8.34731435913152	39.55270440550373	1.1056514746396153e-9	2.502732677900419e-6
ENSG00000104043	ATP8B4	birth weight	43	0.16279069767441862	0.008125597470402236	891	108792	23.72846346465081	8.888049396774315	54.251203855641656	6.004227321645924e-8	8.902100924801423e-5
ENSG00000104043	ATP8B4	hepatic fat	43	0.06976744186046512	1.7464519449959557e-4	22	108792	431.59838100978834	78.1934873351926	1599.526355671887	8.799416520602437e-8	1.1455337970418416e-4
ENSG00000104043	ATP8B4	blood high-density lipoprotein (HDL) levels	43	0.046511627906976744	3.676740936833591e-5	6	108792	1334.234939829509	116.14494418788091	8191.999999985097	2.2847542952313315e-6	0.00210256483634435
ENSG00000104043	ATP8B4	waist to hip ratio (WHR)	43	0.046511627906976744	5.515111405250386e-5	8	108792	881.0271179431065	84.49773313827498	4299.727210771426	4.262732949009435e-6	0.003447323805354221
ENSG00000104043	ATP8B4	blood triglyceride levels	43	0.046511627906976744	7.353481873667182e-5	10	108792	674.4642341161477	66.36363954152576	3574.47578882217	6.8473806334007205e-6	0.0052172145999073724
ENSG00000104043	ATP8B4	metabolic trait	43	0.046511627906976744	1.6545334215751158e-4	20	108792	293.8440370094503	32.059645401631485	1318.0352246898592	2.883865670510361e-5	0.017692681627987414
ENSG00000186480	INSIG1	birth weight	13	0.3076923076923077	0.008150550874323467	891	108827	54.00373303068423	12.141252563424228	195.2797820842878	3.007587010738713e-6	0.0026195161197574515
ENSG00000124243	BCAS4	neurodevelopmental presentations and congenital anomalies (ND/CAs)	28	0.25	0.0076830467507880635	843	108811	43.03460374868652	15.414147112894243	105.70096804334243	1.6767158028766805e-9	3.579788239141713e-6
ENSG00000198131	ZNF544	Klinefelter syndrome	67	0.07462686567164178	0.001452326019615593	163	108791	55.44096693769228	17.165733879824145	139.27646583897715	6.340049562087166e-8	8.90526698358954e-5
ENSG00000198131	ZNF544	neurodevelopmental presentations and congenital anomalies (ND/CAs)	67	0.1044776119402985	0.00768445919239643	843	108791	15.065839624236176	5.791442944710598	33.13942639276308	9.46622742757394e-7	9.399286493139026e-4
ENSG00000198131	ZNF544	primary Sjögren's Syndrome (pSS)	67	0.16417910447761194	0.0285317719296633	3115	108791	6.687790319365672	3.156009188083604	12.916848358121612	3.042810293676103e-6	0.0026195161197574515
ENSG00000198429	ZNF69	smoking cessation	7	0.42857142857142855	0.008426295186811976	920	108826	88.21971276615744	12.90399641100128	521.0348583615822	2.054651800697849e-5	0.0129020046896762
ENSG00000140853	NLRC5	soluble tumor necrosis factor receptor 2 (sTNFR2) levels in plasma	81	0.20987654320987653	0.0012778906530113172	156	108773	207.7249617795432	110.94171124848418	367.9341899268311	2.1865754398172344e-32	1.1670846410024488e-27
ENSG00000140853	NLRC5	mixed connective tissue disease (MCTD)	81	0.12345679012345678	7.906373824386567e-4	96	108773	177.98287108755292	79.03533215734188	366.40448929432677	3.1291971825518834e-19	3.3404179923741356e-15
ENSG00000140853	NLRC5	abdominal obesity	81	0.04938271604938271	8.274112141799895e-5	13	108773	620.6868427263516	137.82841496543543	2533.8891696662913	2.023189935812771e-10	5.399388141200332e-7
ENSG00000140853	NLRC5	primary Sjögren's Syndrome (pSS)	81	0.19753086419753085	0.02849052614159764	3115	108773	8.393692011964639	4.52696748282613	14.694107344934814	1.1253505249575654e-9	2.502732677900419e-6
ENSG00000140853	NLRC5	obesity	81	0.06172839506172839	0.0013882121482353157	156	108773	47.257362593767475	14.730193076189522	117.55005745354806	1.3298232780105387e-7	1.5773181658625e-4
ENSG00000140853	NLRC5	alcohol consumption	81	0.16049382716049382	0.02758037380599965	3013	108773	6.74009056871149	3.4115725312724745	12.331594765651564	3.5430298512131144e-7	4.023600389542553e-4
ENSG00000140853	NLRC5	waist circumference (WC)	81	0.08641975308641975	0.006306712143638587	693	108773	14.904668938629136	5.7697153464848485	32.44242789973058	9.509348395868991e-7	9.399286493139026e-4
ENSG00000140853	NLRC5	body mass index (BMI)	81	0.09876543209876543	0.015702426153549134	1716	108773	6.8690496018780145	2.8538753364714786	14.295623633244471	4.3584308366258846e-5	0.0247480048835007
ENSG00000177311	ZBTB38	schizophrenia	139	0.02877697841726619	8.092921452679401e-4	92	108737	36.57365747814823	9.611119074880602	98.84734170986955	6.5136540859458455e-6	0.0050386418382226015
ENSG00000185811	IKZF1	residential proximity to major roadways at birth	54	0.07407407407407407	0	4	108780	Inf	1354.3491655457321	Inf	5.4101427856232056e-14	3.6095796397829825e-10
ENSG00000185811	IKZF1	Coffin–Siris syndrome (CSS)	54	0.12962962962962962	0.0023349880492737635	261	108780	63.60922088893485	24.02077052358233	143.12789593767917	6.768514999869283e-11	1.9014183585159104e-7
ENSG00000185811	IKZF1	Nicolaides–Baraitser syndrome (NCBRS)	54	0.1111111111111111	0.003134767420481706	347	108780	39.74111735464965	13.802797547188991	93.91663495241824	2.2837755073757426e-8	4.063217256872676e-5
ENSG00000185811	IKZF1	Kabuki syndrome (KS)	54	0.14814814814814814	0.016473616473616472	1800	108780	10.383608234085191	4.225800338253727	22.256483621474075	2.919405116652948e-6	0.0025970541350225185
ENSG00000185811	IKZF1	neurodevelopmental presentations and congenital anomalies (ND/CAs)	54	0.1111111111111111	0.007694429123000552	843	108780	16.119034961445294	5.621588493872902	37.851373245148594	3.9932167632344275e-6	0.0032790453036559628
ENSG00000132128	LRRC41	gender	57	0.3684210526315789	0.00730819437039216	816	108782	79.20522798401677	43.703016545901434	139.9652404617217	3.024154391401947e-30	8.070712032053946e-26
ENSG00000132128	LRRC41	Claes-Jensen syndrome	57	0.21052631578947367	0.009367358570351713	1031	108782	28.180848133449008	13.534758176158718	54.36687298598156	2.3450763707483485e-13	1.251684512886931e-9
ENSG00000132128	LRRC41	Klinefelter syndrome	57	0.08771929824561403	0.001452446176757184	163	108782	66.18735567961957	20.317408077906475	167.32646786037648	2.7845679569776988e-8	4.503827718293475e-5
ENSG00000132128	LRRC41	ancestry	57	0.21052631578947367	0.03970325973047011	4331	108782	6.449564151861396	3.1030952101449167	12.408922467939147	2.066864900561335e-6	0.00193541954504318
ENSG00000132128	LRRC41	neurodevelopmental presentations and congenital anomalies (ND/CAs)	57	0.10526315789473684	0.007694287657884577	843	108782	15.172648053813043	5.306128212575126	35.49876106847901	5.499696484556675e-6	0.004316857350929596
ENSG00000132128	LRRC41	epithelial ovarian cancer risk	57	0.05263157894736842	6.251034178448641e-4	71	108782	88.68335175306332	17.33686409172304	282.48923920130903	7.588450604650275e-6	0.005473426365178492
ENSG00000074800	ENO1	ancestry	130	0.16153846153846155	0.03964166145469262	4331	108724	4.667575616138166	2.774727487180304	7.503054166120536	5.027428207938649e-8	7.66682801710644e-5
ENSG00000074800	ENO1	maternal smoking	130	0.13076923076923078	0.027546815790441853	3012	108724	5.310587334133747	2.9847500498956276	8.89770112068038	1.3179828608358858e-7	1.5773181658625e-4
ENSG00000173209	AHSA2	air pollution (NO2)	32	0.28125	0.046431689720141535	5061	108805	8.037243891482685	3.270923396011244	18.039420830165398	1.0665408184323603e-5	0.007298284126131697
ENSG00000173209	AHSA2	Kabuki syndrome (KS)	32	0.1875	0.01648821285786499	1800	108805	13.76674110214909	4.627421926763214	34.26339982016288	1.2721898274409261e-5	0.008383102720945609
ENSG00000261589	CTC-462L7.1	maternal smoking	59	0.1864406779661017	0.027585255997793916	3012	108790	8.078756463908386	3.778852457270825	15.793076600769021	5.891564127379151e-7	6.417596638752289e-4
ENSG00000163803	PLB1	multiple sclerosis	35	0.5142857142857142	0.06565935075916327	7162	108804	15.064699781343275	7.322781861400574	31.104298772245066	8.003428633382015e-13	3.5598583608897087e-9
ENSG00000163803	PLB1	birth weight	35	0.2	0.008124701297746407	891	108804	30.521757601814993	11.221800522186069	71.70215064861391	1.3259490241517843e-8	2.4404320401414305e-5
ENSG00000102554	KLF5	preterm birth	64	0.125	0.01409318231962933	1541	108776	9.993821170042393	4.106601587631651	21.121938833871464	3.4772704610258303e-6	0.002946020807257995
ENSG00000102554	KLF5	Nicolaides–Baraitser syndrome (NCBRS)	64	0.0625	0.0031532691034787085	347	108776	21.06611627896948	5.530658472180261	57.329500725248344	5.5474780823005304e-5	0.03084340027529071
ENSG00000160094	ZNF362	maternal smoking	7	0.5714285714285714	0.027640453568081157	3012	108826	46.8819960446182	7.92814679934303	318.5710439558636	1.9164577364322955e-5	0.012324208636394432
ENSG00000136045	PWP1	chemotherapy for breast cancer	6	0.5	0.005026233816354097	550	108829	198.8034887129551	26.41438502717775	1585.5428704519893	2.538238516317533e-6	0.0022962454374313274
ENSG00000187147	RNF220	smoking cessation	9	0.6666666666666666	0.008398882599426597	920	108824	234.82947270441275	50.264805396534086	1455.7021124004843	2.9511795834122983e-11	9.265835897919495e-8
ENSG00000187147	RNF220	SETD1B-related syndrome	9	0.4444444444444444	0.015538851723884438	1695	108824	50.68829477556575	10.044220815608325	234.73597821449232	6.939995064982172e-6	0.0052172145999073724
ENSG00000167658	EEF2	ancestry	6	0.6666666666666666	0.03975998823832102	4331	108828	48.301357924415086	6.919256058990301	530.6358496890722	3.5216864715889573e-05	0.020656045650666
ENSG00000197566	ZNF624	educational attainment	8	0.25	6.432049986217035e-4	72	108830	523.8536352675968	50.109982222340136	3261.7012860576356	1.2052422641464783e-5	0.008041225731102285
ENSG00000122386	ZNF205	puberty	11	0.36363636363636365	0.003969785521310029	436	108822	143.8049735704154	30.638860028896058	557.9017114519487	8.199418196174197e-8	1.0941098655519944e-4
ENSG00000122386	ZNF205	preterm birth	11	0.45454545454545453	0.014114792964657882	1541	108822	58.0900154183964	14.031825064435326	227.91008595234686	2.433700005489079e-7	2.8238856041952086e-4
ENSG00000067208	EVI5	maternal smoking	9	0.5555555555555556	0.027631772403146366	3012	108824	43.97511055844102	9.459774173203616	220.9511959102871	1.8578616445607729e-6	0.0017707743799719867
