# Supplementary material for: Genome-wide identification of genes regulating DNA methylation using genetic anchors for causal inference
Source: Genome Biol. 2020 Aug 28;21:220. doi: 10.1186/s13059-020-02114-z (PMC7453518; doi:10.1186/s13059-020-02114-z)
Supplement: Supplementary file 14 — Additional file 14: Table S14. Significant associations between the DNA methylation levels of NLRC5 target CpGs and the expression of nearby genes (<250Kb). [file 13059_2020_2114_MOESM14_ESM.csv]

Ensembl_ID	HGNC_ID	CpG	Target_Ensembl_ID	Target_HGNC_ID	Distance	Test_statistic	P_value
ENSG00000140853	NLRC5	cg00340855	ENSG00000204592	HLA-E	0	-5.440670128324268	5.704050714711283e-8
ENSG00000140853	NLRC5	cg00533183	ENSG00000168394	TAP1	2242	-6.87985127345113	7.166280926501499e-12
ENSG00000140853	NLRC5	cg00533183	ENSG00000204264	PSMB8	0	-6.217128248956574	5.71280842422142e-10
ENSG00000140853	NLRC5	cg00533183	ENSG00000240065	PSMB9	1169	-4.70844534842859	2.6012679614662947e-6
ENSG00000140853	NLRC5	cg00533183	ENSG00000204267	TAP2	-4184	-4.367775304622474	1.2946646414291034e-5
ENSG00000140853	NLRC5	cg01064373	ENSG00000206344	HCG27	-66499	-10.280501582701984	2.044386708909152e-24
ENSG00000140853	NLRC5	cg01064373	ENSG00000204525	HLA-C	0	10.116048584850466	1.0540323018880711e-23
ENSG00000140853	NLRC5	cg01082299	ENSG00000234745	HLA-B	-107003	-4.955208790774193	7.597145771329013e-7
ENSG00000140853	NLRC5	cg01309328	ENSG00000204264	PSMB8	0	-9.172306460263247	8.038118758445808e-20
ENSG00000140853	NLRC5	cg01309328	ENSG00000168394	TAP1	1731	-7.646271030154798	2.7115163347813486e-14
ENSG00000140853	NLRC5	cg01309328	ENSG00000204267	TAP2	-4695	-7.2452322911317415	5.374581516867991e-13
ENSG00000140853	NLRC5	cg01405582	ENSG00000204642	HLA-F	0	-12.83798436347836	7.878591669554326e-37
ENSG00000140853	NLRC5	cg01517384	ENSG00000204525	HLA-C	-83948	-13.714295816965656	1.199021195770656e-41
ENSG00000140853	NLRC5	cg01517384	ENSG00000204516	MICB	138800	5.8424843304617955	5.6542269425901244e-9
ENSG00000140853	NLRC5	cg01517384	ENSG00000204536	CCHCR1	-197840	-5.410336507479322	6.749560242167487e-8
ENSG00000140853	NLRC5	cg05201185	ENSG00000204592	HLA-E	0	-4.373444363779076	1.2616751950351509e-5
ENSG00000140853	NLRC5	cg05358170	ENSG00000204642	HLA-F	0	-16.36565442148059	6.780528147210697e-58
ENSG00000140853	NLRC5	cg07148697	ENSG00000204525	HLA-C	-83345	-16.785148923924112	1.0922692267482125e-60
ENSG00000140853	NLRC5	cg07148697	ENSG00000204520	MICA	48101	7.04735155698714	2.219874162419651e-12
ENSG00000140853	NLRC5	cg07148697	ENSG00000234745	HLA-B	0	-6.354443051983561	2.3855326964956334e-10
ENSG00000140853	NLRC5	cg07148697	ENSG00000206344	HCG27	-151507	5.446872534924973	5.510506934796586e-8
ENSG00000140853	NLRC5	cg07148697	ENSG00000204516	MICB	139403	4.512506434654757	6.635246732651231e-6
ENSG00000140853	NLRC5	cg08099136	ENSG00000204264	PSMB8	0	-9.664083536226743	8.431270001354156e-22
ENSG00000140853	NLRC5	cg08099136	ENSG00000168394	TAP1	1733	-7.595371911911137	3.994403344926926e-14
ENSG00000140853	NLRC5	cg08099136	ENSG00000204267	TAP2	-4693	-6.443569546259555	1.3405782022120364e-10
ENSG00000140853	NLRC5	cg08099136	ENSG00000204252	HLA-DOA	160702	4.282992260756719	1.8977357339299553e-5
ENSG00000140853	NLRC5	cg08099136	ENSG00000242574	HLA-DMB	91153	4.016776895984264	6.0344243580409054e-5
ENSG00000140853	NLRC5	cg08818207	ENSG00000168394	TAP1	0	-6.020137335265174	1.938512208974997e-9
ENSG00000140853	NLRC5	cg08818207	ENSG00000204261	TAPSAR1	-6082	-4.410318254177167	1.0658944303361903e-5
ENSG00000140853	NLRC5	cg08818207	ENSG00000242574	HLA-DMB	82049	4.00723357792124	6.2821628691044e-5
ENSG00000140853	NLRC5	cg10601943	ENSG00000204642	HLA-F	0	-7.5286775941444155	6.611701178882906e-14
ENSG00000140853	NLRC5	cg11019014	ENSG00000204592	HLA-E	0	-5.1403312712725935	2.9057216138292183e-7
ENSG00000140853	NLRC5	cg11187245	ENSG00000204516	MICB	139259	7.976801674311657	2.0664138892810934e-15
ENSG00000140853	NLRC5	cg11187245	ENSG00000204525	HLA-C	-83489	-7.749666759340292	1.2252551357708578e-14
ENSG00000140853	NLRC5	cg11187245	ENSG00000204520	MICA	47957	6.850359690498097	8.784640507013533e-12
ENSG00000140853	NLRC5	cg11187245	ENSG00000234745	HLA-B	0	-4.133359572087093	3.665904701421872e-5
ENSG00000140853	NLRC5	cg11247343	ENSG00000137310	TCF19	-102887	-9.530734565319147	2.9650153074551815e-21
ENSG00000140853	NLRC5	cg11247343	ENSG00000206344	HCG27	-66078	-5.171554115451307	2.463036125196117e-7
ENSG00000140853	NLRC5	cg11247343	ENSG00000204520	MICA	133530	4.978365145950767	6.74852121342941e-7
ENSG00000140853	NLRC5	cg11587584	ENSG00000204642	HLA-F	0	-11.312852496850066	3.977180701398695e-29
ENSG00000140853	NLRC5	cg11594821	ENSG00000204592	HLA-E	0	-4.345285325022514	1.4338325049244688e-5
ENSG00000140853	NLRC5	cg11617938	ENSG00000204642	HLA-F	0	-12.271758280681775	7.2183222753773794e-34
ENSG00000140853	NLRC5	cg12537337	ENSG00000026950	BTN3A1	-26845	-20.56640914394248	2.0177088880745173e-88
ENSG00000140853	NLRC5	cg12537337	ENSG00000112763	BTN2A1	15858	-17.29238933288667	3.82680739048936e-64
ENSG00000140853	NLRC5	cg12537337	ENSG00000124508	BTN2A2	-47187	-15.201135611938497	1.8646071478489685e-50
ENSG00000140853	NLRC5	cg12537337	ENSG00000186470	BTN3A2	-63743	-12.565037834973996	2.1836256965422534e-35
ENSG00000140853	NLRC5	cg12537337	ENSG00000228223	HCG11	79784	-6.731051444477614	1.9854135984135242e-11
ENSG00000140853	NLRC5	cg12537337	ENSG00000182952	HMGN4	96341	5.9394848492777825	3.163240798481025e-9
ENSG00000140853	NLRC5	cg12537337	ENSG00000158406	HIST1H4H	-156527	-5.78970893708039	7.726656546832887e-9
ENSG00000140853	NLRC5	cg12537337	ENSG00000111801	BTN3A3	0	-5.553070169409243	3.034269461139649e-8
ENSG00000140853	NLRC5	cg12588917	ENSG00000204642	HLA-F	0	-15.080561190838734	1.0329070575889738e-49
ENSG00000140853	NLRC5	cg13007871	ENSG00000204592	HLA-E	0	-7.2636612141749906	4.700752177537828e-13
ENSG00000140853	NLRC5	cg13031097	ENSG00000204525	HLA-C	-82669	-17.397970503037808	7.127035570733584e-65
ENSG00000140853	NLRC5	cg13031097	ENSG00000204520	MICA	48777	13.670774422299065	2.1121007761939206e-41
ENSG00000140853	NLRC5	cg13031097	ENSG00000204516	MICB	140079	6.675597467726988	2.88716800622381e-11
ENSG00000140853	NLRC5	cg13031097	ENSG00000234745	HLA-B	0	-4.528714462546928	6.149128410230523e-6
ENSG00000140853	NLRC5	cg13031097	ENSG00000204536	CCHCR1	-196561	-4.085053213130748	4.513800073411006e-5
ENSG00000140853	NLRC5	cg13040666	ENSG00000204632	HLA-G	101208	11.2153814268064	1.1532506158126077e-28
ENSG00000140853	NLRC5	cg13040666	ENSG00000206503	HLA-A	215501	-9.37127104151064	1.3058650501896149e-20
ENSG00000140853	NLRC5	cg13040666	ENSG00000204642	HLA-F	0	-5.359127977215258	8.949766776529985e-8
ENSG00000140853	NLRC5	cg14140375	ENSG00000204642	HLA-F	0	-10.838405090246182	6.542689682222382e-27
ENSG00000140853	NLRC5	cg14140375	ENSG00000206503	HLA-A	216453	-4.384823480986957	1.1978636622182987e-5
ENSG00000140853	NLRC5	cg15331332	ENSG00000204642	HLA-F	0	-14.588047505386939	9.951331554604118e-47
ENSG00000140853	NLRC5	cg16186435	ENSG00000168394	TAP1	2151	-7.012631366085103	2.836397794365429e-12
ENSG00000140853	NLRC5	cg16186435	ENSG00000204264	PSMB8	0	-6.8970877378041955	6.359843782635648e-12
ENSG00000140853	NLRC5	cg16186435	ENSG00000204267	TAP2	-4275	-5.285095425562262	1.3398681934653386e-7
ENSG00000140853	NLRC5	cg16186435	ENSG00000204252	HLA-DOA	161120	4.285859834810365	1.8735554375560424e-5
ENSG00000140853	NLRC5	cg16186435	ENSG00000242574	HLA-DMB	91571	4.27346489066952	1.9802268886784543e-5
ENSG00000140853	NLRC5	cg17608381	ENSG00000204632	HLA-G	-112647	-17.050417803186676	1.7452367238648457e-62
ENSG00000140853	NLRC5	cg17608381	ENSG00000206503	HLA-A	0	-11.032765237204856	8.286035166199441e-28
ENSG00000140853	NLRC5	cg17608381	ENSG00000204642	HLA-F	-205244	10.108439278539127	1.1364653690037487e-23
ENSG00000140853	NLRC5	cg17608381	ENSG00000234127	TRIM26	240680	7.876192247004486	4.572885197985506e-15
ENSG00000140853	NLRC5	cg21108826	ENSG00000204525	HLA-C	568	-30.38187496261977	1.5268130142382682e-178
ENSG00000140853	NLRC5	cg21108826	ENSG00000204520	MICA	135398	10.185158475709562	5.306478252866525e-24
ENSG00000140853	NLRC5	cg21108826	ENSG00000234745	HLA-B	85691	-5.363320020886692	8.746233018171807e-8
ENSG00000140853	NLRC5	cg21108826	ENSG00000204536	CCHCR1	-109940	-4.6414467648933995	3.597573103238929e-6
ENSG00000140853	NLRC5	cg21108826	ENSG00000206344	HCG27	-64210	4.600241893072703	4.382332360275882e-6
ENSG00000140853	NLRC5	cg21366673	ENSG00000137404	NRM	196310	4.296987944475794	1.7824713113755147e-5
ENSG00000140853	NLRC5	cg21684411	ENSG00000234745	HLA-B	-106607	-5.780124851045071	8.175186075880577e-9
ENSG00000140853	NLRC5	cg23232773	ENSG00000234745	HLA-B	-106936	-4.744765989099613	2.1780810468663597e-6
ENSG00000140853	NLRC5	cg23892836	ENSG00000204642	HLA-F	0	-17.668955423299565	9.178995990837878e-67
ENSG00000140853	NLRC5	cg23892836	ENSG00000204632	HLA-G	102657	5.1362845957640575	2.9684401231329493e-7
ENSG00000140853	NLRC5	cg23923934	ENSG00000204525	HLA-C	-83006	-8.70874365874919	4.819610348215843e-18
ENSG00000140853	NLRC5	cg23923934	ENSG00000204520	MICA	48440	5.1186314013581615	3.257675756983828e-7
ENSG00000140853	NLRC5	cg23923934	ENSG00000204536	CCHCR1	-196898	-5.1031268874783855	3.5340050217089874e-7
ENSG00000140853	NLRC5	cg23923934	ENSG00000137310	TCF19	-187977	-5.001438772782622	5.994209162753162e-7
ENSG00000140853	NLRC5	cg23923934	ENSG00000204516	MICB	139742	4.639581079083226	3.629984815536561e-6
ENSG00000140853	NLRC5	cg23923934	ENSG00000206344	HCG27	-151168	-4.59334283914033	4.528826150477091e-6
ENSG00000140853	NLRC5	cg23923934	ENSG00000213760	ATP6V1G2	189323	-4.233368466847441	2.3663514886535186e-5
ENSG00000140853	NLRC5	cg24351901	ENSG00000204642	HLA-F	0	-12.428934767404925	1.1174372384946124e-34
ENSG00000140853	NLRC5	cg25843003	ENSG00000234745	HLA-B	-106346	-6.173418108995889	7.51552184924799e-10
ENSG00000140853	NLRC5	cg27486585	ENSG00000137404	NRM	196227	4.059352960097905	5.0376608535352446e-5
ENSG00000140853	NLRC5	cg27529346	ENSG00000204525	HLA-C	-83018	-8.791415729102733	2.3562447288171953e-18
ENSG00000140853	NLRC5	cg27529346	ENSG00000204516	MICB	139730	6.0233981043967475	1.9002666767934106e-9
ENSG00000140853	NLRC5	cg27529346	ENSG00000204520	MICA	48428	5.373472516355318	8.271709625562916e-8
ENSG00000140853	NLRC5	cg27529346	ENSG00000204536	CCHCR1	-196910	-4.403510325460396	1.0997068462849505e-5
