# Supplementary material for: Genome-wide identification of genes regulating DNA methylation using genetic anchors for causal inference
Source: Genome Biol. 2020 Aug 28;21:220. doi: 10.1186/s13059-020-02114-z (PMC7453518; doi:10.1186/s13059-020-02114-z)
Supplement: Supplementary file 15 — Additional file 15: Table S15. Significant associations between the GI corresponding to NLRC5 and the expression of genes near its target CpGs (<250Kb). [file 13059_2020_2114_MOESM15_ESM.csv]

Ensembl_ID	HGNC_ID	Target_Ensembl_ID	Target_HGNC_ID	Test_statistic	P_value
ENSG00000140853	NLRC5	ENSG00000026950	BTN3A1	17.44782085894134	2.5962922483297434e-65
ENSG00000140853	NLRC5	ENSG00000111801	BTN3A3	12.919529740528201	2.6949429581769418e-37
ENSG00000140853	NLRC5	ENSG00000204642	HLA-F	12.708905424017509	3.58491284973445e-36
ENSG00000140853	NLRC5	ENSG00000124508	BTN2A2	12.118822702914626	4.1193930511202396e-33
ENSG00000140853	NLRC5	ENSG00000206503	HLA-A	10.329157488628068	1.2172300478263305e-24
ENSG00000140853	NLRC5	ENSG00000234745	HLA-B	9.601298775175092	1.4946729959930247e-21
ENSG00000140853	NLRC5	ENSG00000204592	HLA-E	7.796341975895673	8.45109497681396e-15
ENSG00000140853	NLRC5	ENSG00000168394	TAP1	7.657170841397639	2.4726704218158577e-14
ENSG00000140853	NLRC5	ENSG00000186470	BTN3A2	7.435510634344185	1.3169425125206395e-13
ENSG00000140853	NLRC5	ENSG00000112763	BTN2A1	7.008809026904232	2.8953593008071816e-12
ENSG00000140853	NLRC5	ENSG00000204267	TAP2	6.143233158860856	9.038688672038418e-10
ENSG00000140853	NLRC5	ENSG00000223865	HLA-DPB1	5.813954304309819	6.675675161375408e-9
ENSG00000140853	NLRC5	ENSG00000204261	TAPSAR1	5.736550299535964	1.052383840037546e-8
ENSG00000140853	NLRC5	ENSG00000182952	HMGN4	4.833278496655475	1.4035800628016003e-6
ENSG00000140853	NLRC5	ENSG00000204264	PSMB8	4.604267096027414	4.293584810446142e-6
ENSG00000140853	NLRC5	ENSG00000204525	HLA-C	4.457779712679745	8.553689371646885e-6
ENSG00000140853	NLRC5	ENSG00000240065	PSMB9	4.2727031658262	1.985093875160972e-5
