# Supplementary material for: Genome-wide identification of genes regulating DNA methylation using genetic anchors for causal inference
Source: Genome Biol. 2020 Aug 28;21:220. doi: 10.1186/s13059-020-02114-z (PMC7453518; doi:10.1186/s13059-020-02114-z)
Supplement: Supplementary file 16 — Additional file 16: Table S16. Significant associations between the DNA methylation levels of SENP7 target CpGs and the expression of nearby genes (<250Kb). [file 13059_2020_2114_MOESM16_ESM.csv]

Ensembl_ID	HGNC_ID	CpG	Target_Ensembl_ID	Target_HGNC_ID	Distance	Test_statistic	P_value
ENSG00000138468	SENP7	cg00298065	ENSG00000171606	ZNF274	0	7.053899576743342	2.1193353104161384e-12
ENSG00000138468	SENP7	cg00298065	ENSG00000121413	ZSCAN18	-85782	6.719270065241769	2.1503309024053443e-11
ENSG00000138468	SENP7	cg00298065	ENSG00000176293	ZNF135	-117899	6.212891805996981	5.867162434576113e-10
ENSG00000138468	SENP7	cg00298065	ENSG00000166704	ZNF606	-200859	4.332924465285541	1.5162854906209867e-5
ENSG00000138468	SENP7	cg00541956	ENSG00000196724	ZNF418	-8256	-14.800326738094853	5.276084602474916e-48
ENSG00000138468	SENP7	cg00541956	ENSG00000121413	ZSCAN18	140185	-14.523804221287604	2.4030647640791994e-46
ENSG00000138468	SENP7	cg00541956	ENSG00000083814	ZNF671	-216025	-11.51642975443705	4.1899151219224666e-30
ENSG00000138468	SENP7	cg00541956	ENSG00000171606	ZNF274	239376	-10.788591115795569	1.105133330566402e-26
ENSG00000138468	SENP7	cg00541956	ENSG00000179909	ZNF154	-234438	-10.690097518320506	3.095456738112449e-26
ENSG00000138468	SENP7	cg00541956	ENSG00000204514	ZNF814	-54575	-10.198677894416802	4.637495960964833e-24
ENSG00000138468	SENP7	cg00541956	ENSG00000176293	ZNF135	115587	-9.188578884598964	6.937354505760254e-20
ENSG00000138468	SENP7	cg00541956	ENSG00000181894	ZNF329	182599	-9.04809654965205	2.4542066043153435e-19
ENSG00000138468	SENP7	cg00541956	ENSG00000204519	ZNF551	-226348	-8.47603264097219	3.492873908895136e-17
ENSG00000138468	SENP7	cg00541956	ENSG00000173480	ZNF417	-27039	-6.646236764078057	3.5161355899140555e-11
ENSG00000138468	SENP7	cg00541956	ENSG00000152454	ZNF256	0	-6.4941072648479565	9.636636566664852e-11
ENSG00000138468	SENP7	cg00541956	ENSG00000152443	ZNF776	-185490	-5.974538464726399	2.558765571112699e-9
ENSG00000138468	SENP7	cg00541956	ENSG00000176593	CTD-2368P22.1	58409	-5.939326430706584	3.1662656438671803e-9
ENSG00000138468	SENP7	cg00541956	ENSG00000166704	ZNF606	33401	-5.739597553750363	1.0368306477503294e-8
ENSG00000138468	SENP7	cg00541956	ENSG00000269343	ZNF587B	-84999	-4.50359613162146	6.9179405928976365e-6
ENSG00000138468	SENP7	cg00569896	ENSG00000250312	ZNF718	-46602	-8.802457752707314	2.1404412370716788e-18
ENSG00000138468	SENP7	cg00578032	ENSG00000198182	ZNF607	-97377	-4.806420799847467	1.6067171505195232e-6
ENSG00000138468	SENP7	cg00647741	ENSG00000196724	ZNF418	-246688	-12.60467079298464	1.353340039478154e-35
ENSG00000138468	SENP7	cg00647741	ENSG00000121413	ZSCAN18	-63655	-11.485415345799776	5.917330173949725e-30
ENSG00000138468	SENP7	cg00647741	ENSG00000171606	ZNF274	944	-8.789187328702257	2.4023343930419194e-18
ENSG00000138468	SENP7	cg00647741	ENSG00000176293	ZNF135	-95772	-7.887226484184421	4.1932916057426104e-15
ENSG00000138468	SENP7	cg00647741	ENSG00000152454	ZNF256	-234406	-6.536687776590528	7.283200452799732e-11
ENSG00000138468	SENP7	cg00647741	ENSG00000181894	ZNF329	-26972	-6.05768043024012	1.5401632713500598e-9
ENSG00000138468	SENP7	cg00647741	ENSG00000176593	CTD-2368P22.1	-170849	-4.8900530020207365	1.0573398668978185e-6
ENSG00000138468	SENP7	cg00880079	ENSG00000181007	ZFP82	-247759	-7.470508246481197	1.0226537222674994e-13
ENSG00000138468	SENP7	cg00880079	ENSG00000197863	ZNF790	151010	-5.850845990331697	5.379988158536996e-9
ENSG00000138468	SENP7	cg01268824	ENSG00000179909	ZNF154	-238	-28.287565069600785	1.861024382105752e-157
ENSG00000138468	SENP7	cg01268824	ENSG00000196724	ZNF418	212432	-18.208033718245122	1.3553289081731443e-70
ENSG00000138468	SENP7	cg01268824	ENSG00000083814	ZNF671	10299	-18.1151871706062	6.287503610434866e-70
ENSG00000138468	SENP7	cg01268824	ENSG00000204519	ZNF551	0	-14.777724896611332	7.225744844662712e-48
ENSG00000138468	SENP7	cg01268824	ENSG00000204514	ZNF814	139279	-13.573347074026875	7.458748562585418e-41
ENSG00000138468	SENP7	cg01268824	ENSG00000121417	ZNF211	-66670	-11.920070466847468	4.342197992370616e-32
ENSG00000138468	SENP7	cg01268824	ENSG00000213762	ZNF134	-86093	-9.61376071449794	1.3577346266981687e-21
ENSG00000138468	SENP7	cg01268824	ENSG00000152454	ZNF256	231381	-9.471836542579826	5.140574576369587e-21
ENSG00000138468	SENP7	cg01268824	ENSG00000171649	ZIK1	-115672	-9.125364243740037	1.227657031365211e-19
ENSG00000138468	SENP7	cg01268824	ENSG00000197128	ZNF772	-231879	-9.057967719480878	2.247040407716607e-19
ENSG00000138468	SENP7	cg01268824	ENSG00000152443	ZNF776	37344	-8.564167441505438	1.6594288549676742e-17
ENSG00000138468	SENP7	cg01268824	ENSG00000105136	ZNF419	-214769	-6.562868234001039	6.126147679591771e-11
ENSG00000138468	SENP7	cg01268824	ENSG00000183647	ZNF530	-96727	-6.210558015397564	5.953925068335627e-10
ENSG00000138468	SENP7	cg01268824	ENSG00000173480	ZNF417	190844	-6.16517127243836	7.913051526137138e-10
ENSG00000138468	SENP7	cg01268824	ENSG00000152439	ZNF773	-191045	-5.393551211792934	7.405583340972109e-8
ENSG00000138468	SENP7	cg01268824	ENSG00000083817	ZNF416	-130522	-5.094746170760797	3.692657488782086e-7
ENSG00000138468	SENP7	cg01268824	ENSG00000121406	ZNF549	-151907	-4.613190524779764	4.1195554348393294e-6
ENSG00000138468	SENP7	cg01436998	ENSG00000198182	ZNF607	-97571	-6.879054615221569	7.20588381729292e-12
ENSG00000138468	SENP7	cg01501009	ENSG00000127903	ZNF835	-116	-14.899525477654363	1.3206136136069085e-48
ENSG00000138468	SENP7	cg01501009	ENSG00000166770	ZNF667-AS1	-171232	-9.640561347700164	1.0537505993940377e-21
ENSG00000138468	SENP7	cg01501009	ENSG00000196867	ZFP28	-115098	-9.177053538189424	7.700277335918214e-20
ENSG00000138468	SENP7	cg01501009	ENSG00000197016	ZNF470	-82988	-6.983401955251296	3.483317066302788e-12
ENSG00000138468	SENP7	cg01644850	ENSG00000196724	ZNF418	240019	-13.356492867179018	1.2019317266361471e-39
ENSG00000138468	SENP7	cg01644850	ENSG00000179909	ZNF154	15502	-13.235765074909136	5.552797693761543e-39
ENSG00000138468	SENP7	cg01644850	ENSG00000083814	ZNF671	37886	-9.656091173418233	9.095432515563185e-22
ENSG00000138468	SENP7	cg01644850	ENSG00000213762	ZNF134	-58506	-8.879344942862282	1.0931337112747578e-18
ENSG00000138468	SENP7	cg01644850	ENSG00000204519	ZNF551	104	-8.404325668286686	6.365965002544521e-17
ENSG00000138468	SENP7	cg01644850	ENSG00000204514	ZNF814	166866	-7.960884178951759	2.3445934564147134e-15
ENSG00000138468	SENP7	cg01644850	ENSG00000171649	ZIK1	-88085	-7.817605421858222	7.230916571172268e-15
ENSG00000138468	SENP7	cg01644850	ENSG00000121417	ZNF211	-39083	-6.229541783211326	5.282998114630534e-10
ENSG00000138468	SENP7	cg01644850	ENSG00000197128	ZNF772	-204292	-5.950056501461188	2.9676229778882114e-9
ENSG00000138468	SENP7	cg01644850	ENSG00000152443	ZNF776	64931	-5.740533697567629	1.0311725872294734e-8
ENSG00000138468	SENP7	cg01644850	ENSG00000152439	ZNF773	-163458	-5.022381484095556	5.380470048242027e-7
ENSG00000138468	SENP7	cg01644850	ENSG00000105136	ZNF419	-187182	-4.803473165991518	1.6303920993898655e-6
ENSG00000138468	SENP7	cg01644850	ENSG00000121406	ZNF549	-124320	-4.515329059955095	6.5480243497964015e-6
ENSG00000138468	SENP7	cg01644850	ENSG00000183647	ZNF530	-69140	-4.381813167289235	1.2144383731083947e-5
ENSG00000138468	SENP7	cg01947224	ENSG00000179909	ZNF154	118848	-8.619108336220592	1.0396716187877039e-17
ENSG00000138468	SENP7	cg01947224	ENSG00000131845	ZNF304	-218618	-7.758579619370004	1.1436311349570365e-14
ENSG00000138468	SENP7	cg01947224	ENSG00000083814	ZNF671	141232	-6.871726551026139	7.580381689359706e-12
ENSG00000138468	SENP7	cg01947224	ENSG00000171649	ZIK1	0	-6.609300827913903	4.50031815877672e-11
ENSG00000138468	SENP7	cg01947224	ENSG00000204519	ZNF551	103450	-6.226650035408815	5.380210338783509e-10
ENSG00000138468	SENP7	cg01947224	ENSG00000152433	ZNF547	-198951	-6.02311788063541	1.9035243181259924e-9
ENSG00000138468	SENP7	cg01947224	ENSG00000197128	ZNF772	-100946	-5.913271396016408	3.7040598822663496e-9
ENSG00000138468	SENP7	cg01947224	ENSG00000213762	ZNF134	35714	-5.503618064714644	4.0114342129098006e-8
ENSG00000138468	SENP7	cg01947224	ENSG00000121417	ZNF211	51874	-5.378340208476781	8.053136489477536e-8
ENSG00000138468	SENP7	cg01947224	ENSG00000121406	ZNF549	-20974	-5.266360402835349	1.482707111710021e-7
ENSG00000138468	SENP7	cg01947224	ENSG00000105136	ZNF419	-83836	-5.037863803668884	4.966200028849932e-7
ENSG00000138468	SENP7	cg01947224	ENSG00000152443	ZNF776	168277	-4.868079171542381	1.1809711888888466e-6
ENSG00000138468	SENP7	cg02280912	ENSG00000196724	ZNF418	33155	-23.77935599389512	2.6049792165240563e-115
ENSG00000138468	SENP7	cg02280912	ENSG00000179909	ZNF154	-179515	-20.819180318118015	1.970819936549023e-90
ENSG00000138468	SENP7	cg02280912	ENSG00000083814	ZNF671	-161102	-18.48478575740694	1.346754184609035e-72
ENSG00000138468	SENP7	cg02280912	ENSG00000121413	ZSCAN18	195108	-15.35947459152837	1.9343959305117236e-51
ENSG00000138468	SENP7	cg02280912	ENSG00000204514	ZNF814	0	-14.594244763930487	9.138366532553389e-47
ENSG00000138468	SENP7	cg02280912	ENSG00000204519	ZNF551	-171425	-13.515612205977346	1.5694533666989393e-40
ENSG00000138468	SENP7	cg02280912	ENSG00000152454	ZNF256	52104	-12.439314827077178	9.871670033418611e-35
ENSG00000138468	SENP7	cg02280912	ENSG00000121417	ZNF211	-245947	-12.160139191782717	2.6803142766957196e-33
ENSG00000138468	SENP7	cg02280912	ENSG00000176293	ZNF135	170510	-12.134341552457345	3.624110606289137e-33
ENSG00000138468	SENP7	cg02280912	ENSG00000181894	ZNF329	237522	-11.562213207823133	2.513175680827199e-30
ENSG00000138468	SENP7	cg02280912	ENSG00000152443	ZNF776	-130567	-10.611275828583098	7.014395993486887e-26
ENSG00000138468	SENP7	cg02280912	ENSG00000173480	ZNF417	11567	-6.902762720893064	6.114340054664677e-12
ENSG00000138468	SENP7	cg02280912	ENSG00000269343	ZNF587B	-30076	-4.855731438725257	1.2564318023876176e-6
ENSG00000138468	SENP7	cg02940165	ENSG00000127903	ZNF835	24455	-11.270793403607207	6.30269558095348e-29
ENSG00000138468	SENP7	cg02940165	ENSG00000196867	ZFP28	-81393	-7.937664722520547	2.8177113654206478e-15
ENSG00000138468	SENP7	cg02940165	ENSG00000166770	ZNF667-AS1	-137527	-7.693783802304441	1.8846031150125997e-14
ENSG00000138468	SENP7	cg02940165	ENSG00000197016	ZNF470	-49283	-4.571935985606947	5.013853169144754e-6
ENSG00000138468	SENP7	cg03007201	ENSG00000131845	ZNF304	-3971	-13.044794971774927	6.094154347139092e-38
ENSG00000138468	SENP7	cg03007201	ENSG00000152433	ZNF547	0	-10.689037419393749	3.1298158260785896e-26
ENSG00000138468	SENP7	cg03007201	ENSG00000178229	ZNF543	-33093	-8.892658036843057	9.725306700725615e-19
ENSG00000138468	SENP7	cg03007201	ENSG00000171649	ZIK1	214584	-8.609503177341487	1.1284546306517124e-17
ENSG00000138468	SENP7	cg03007201	ENSG00000105136	ZNF419	123839	-7.332096783755047	2.850493638184579e-13
ENSG00000138468	SENP7	cg03007201	ENSG00000197128	ZNF772	102791	-6.862086977817816	8.102187611630933e-12
ENSG00000138468	SENP7	cg03007201	ENSG00000152439	ZNF773	136043	-5.7520678496565685	9.638770264702131e-9
ENSG00000138468	SENP7	cg03007201	ENSG00000121406	ZNF549	163453	-5.678966930501853	1.4752239387230107e-8
ENSG00000138468	SENP7	cg03007201	ENSG00000083817	ZNF416	207694	-5.403881694505471	6.994881316620045e-8
ENSG00000138468	SENP7	cg03007201	ENSG00000183647	ZNF530	236013	-4.6191734235355515	4.003306688048624e-6
ENSG00000138468	SENP7	cg03077453	ENSG00000167555	ZNF528	186	-4.407408458687447	1.0802229464858331e-5
ENSG00000138468	SENP7	cg03092271	ENSG00000196172	ZNF681	-3778	-6.145634576027425	8.938455712116704e-10
ENSG00000138468	SENP7	cg03142586	ENSG00000179909	ZNF154	0	-15.816317378150844	2.5040628734171165e-54
ENSG00000138468	SENP7	cg03142586	ENSG00000083814	ZNF671	11037	-11.894704933829011	5.810816325754713e-32
ENSG00000138468	SENP7	cg03142586	ENSG00000196724	ZNF418	213170	-11.624511510773678	1.2499322107204518e-30
ENSG00000138468	SENP7	cg03142586	ENSG00000204519	ZNF551	0	-9.247533000143047	4.0605870290620986e-20
ENSG00000138468	SENP7	cg03142586	ENSG00000204514	ZNF814	140017	-8.55471265660076	1.79796768504482e-17
ENSG00000138468	SENP7	cg03142586	ENSG00000121417	ZNF211	-65932	-8.353592209009435	9.706301831756133e-17
ENSG00000138468	SENP7	cg03142586	ENSG00000171649	ZIK1	-114934	-6.996130937335989	3.1855115232663768e-12
ENSG00000138468	SENP7	cg03142586	ENSG00000152454	ZNF256	232119	-6.752262188118979	1.7191668613667943e-11
ENSG00000138468	SENP7	cg03142586	ENSG00000213762	ZNF134	-85355	-6.522410193339052	8.001645350154648e-11
ENSG00000138468	SENP7	cg03142586	ENSG00000197128	ZNF772	-231141	-5.727928227711093	1.1099440484328136e-8
ENSG00000138468	SENP7	cg03142586	ENSG00000152443	ZNF776	38082	-5.308453335112736	1.1803526650484258e-7
ENSG00000138468	SENP7	cg03142586	ENSG00000173480	ZNF417	191582	-4.597632673522345	4.437194045263236e-6
ENSG00000138468	SENP7	cg03234186	ENSG00000179909	ZNF154	-77	-34.51979509373183	1.5839015141926513e-222
ENSG00000138468	SENP7	cg03234186	ENSG00000196724	ZNF418	212593	-23.377801167287732	8.508616858343165e-112
ENSG00000138468	SENP7	cg03234186	ENSG00000083814	ZNF671	10460	-23.148000509496477	8.352956267633978e-110
ENSG00000138468	SENP7	cg03234186	ENSG00000204519	ZNF551	0	-17.391903825102478	7.851441973659078e-65
ENSG00000138468	SENP7	cg03234186	ENSG00000204514	ZNF814	139440	-16.800599724368382	8.596758412266566e-61
ENSG00000138468	SENP7	cg03234186	ENSG00000121417	ZNF211	-66509	-14.831713797810776	3.4068848506664196e-48
ENSG00000138468	SENP7	cg03234186	ENSG00000171649	ZIK1	-115511	-13.182348086934384	1.0886230751812293e-38
ENSG00000138468	SENP7	cg03234186	ENSG00000213762	ZNF134	-85932	-13.152634040973663	1.5814548760245464e-38
ENSG00000138468	SENP7	cg03234186	ENSG00000152454	ZNF256	231542	-12.70746139020705	3.888792324859482e-36
ENSG00000138468	SENP7	cg03234186	ENSG00000197128	ZNF772	-231718	-11.552136842408856	2.812852068688675e-30
ENSG00000138468	SENP7	cg03234186	ENSG00000152443	ZNF776	37505	-10.143802511973275	8.005433958396516e-24
ENSG00000138468	SENP7	cg03234186	ENSG00000105136	ZNF419	-214608	-9.131990919289871	1.156555133271937e-19
ENSG00000138468	SENP7	cg03234186	ENSG00000183647	ZNF530	-96566	-8.303832430673928	1.4646179082660008e-16
ENSG00000138468	SENP7	cg03234186	ENSG00000173480	ZNF417	191005	-7.639648047449857	2.852087591366897e-14
ENSG00000138468	SENP7	cg03234186	ENSG00000152439	ZNF773	-190884	-7.464579809589491	1.0689471764316781e-13
ENSG00000138468	SENP7	cg03234186	ENSG00000083817	ZNF416	-130361	-6.509081638998329	8.734648720632791e-11
ENSG00000138468	SENP7	cg03234186	ENSG00000121406	ZNF549	-151746	-6.460106212198624	1.2036365536061816e-10
ENSG00000138468	SENP7	cg03234186	ENSG00000269343	ZNF587B	110440	-4.548058900356071	5.613517320016343e-6
ENSG00000138468	SENP7	cg03562414	ENSG00000161551	ZNF577	0	-31.547346580192194	1.2249890486356042e-190
ENSG00000138468	SENP7	cg03562414	ENSG00000198093	ZNF649	1397	-17.513914487450414	1.1146375555795106e-65
ENSG00000138468	SENP7	cg03562414	ENSG00000197608	ZNF841	176639	-6.42475499670383	1.5149531539051084e-10
ENSG00000138468	SENP7	cg03584535	ENSG00000204514	ZNF814	79265	-16.055888443344426	7.169988674242254e-56
ENSG00000138468	SENP7	cg03584535	ENSG00000083814	ZNF671	-41839	-12.684864528262203	5.11931668587773e-36
ENSG00000138468	SENP7	cg03584535	ENSG00000179909	ZNF154	-60252	-11.817547251992869	1.4048073234524286e-31
ENSG00000138468	SENP7	cg03584535	ENSG00000196724	ZNF418	152418	-11.476993826299697	6.497874225562843e-30
ENSG00000138468	SENP7	cg03584535	ENSG00000269343	ZNF587B	50265	-11.214304491363963	1.1668411925393872e-28
ENSG00000138468	SENP7	cg03584535	ENSG00000152454	ZNF256	171367	-8.64565097992966	8.286319265309578e-18
ENSG00000138468	SENP7	cg03584535	ENSG00000204519	ZNF551	-52162	-8.081870703037694	8.924792271129927e-16
ENSG00000138468	SENP7	cg03584535	ENSG00000213762	ZNF134	-146107	-7.413786354223249	1.5599486192364995e-13
ENSG00000138468	SENP7	cg03584535	ENSG00000171649	ZIK1	-175686	-6.694751327305758	2.5377239197687678e-11
ENSG00000138468	SENP7	cg03584535	ENSG00000176593	CTD-2368P22.1	232595	-6.10033897387866	1.184002246702144e-9
ENSG00000138468	SENP7	cg03584535	ENSG00000121417	ZNF211	-126684	-6.013859835690098	2.014264908133816e-9
ENSG00000138468	SENP7	cg03584535	ENSG00000152443	ZNF776	-11304	-5.9164830587403605	3.6332470440386726e-9
ENSG00000138468	SENP7	cg03584535	ENSG00000166704	ZNF606	207587	-4.318034862950539	1.6216168727203113e-5
ENSG00000138468	SENP7	cg03975694	ENSG00000120784	ZFP30	62176	-4.6873883804982865	2.881661194342201e-6
ENSG00000138468	SENP7	cg04062087	ENSG00000196724	ZNF418	-220070	-8.490327638434119	3.097198130287146e-17
ENSG00000138468	SENP7	cg04062087	ENSG00000121413	ZSCAN18	-37037	-7.885675282683706	4.24471779785017e-15
ENSG00000138468	SENP7	cg04062087	ENSG00000181894	ZNF329	-354	-6.13851070019756	9.343721258763464e-10
ENSG00000138468	SENP7	cg04062087	ENSG00000152454	ZNF256	-207788	-5.8559755216147815	5.218208152646973e-9
ENSG00000138468	SENP7	cg04062087	ENSG00000171606	ZNF274	27562	-5.266956976169828	1.4779397338461105e-7
ENSG00000138468	SENP7	cg04062087	ENSG00000176293	ZNF135	-69154	-4.780620385233823	1.8256719102319398e-6
ENSG00000138468	SENP7	cg04206284	ENSG00000196247	ZNF107	0	-16.072417554904074	5.601803762658729e-56
ENSG00000138468	SENP7	cg04206284	ENSG00000197008	ZNF138	127248	-9.506049198551214	3.735571563394884e-21
ENSG00000138468	SENP7	cg04206284	ENSG00000198039	ZNF273	203032	-5.526477965519223	3.52676825876208e-8
ENSG00000138468	SENP7	cg04684267	ENSG00000196724	ZNF418	-247740	-17.115376587914934	6.286047551099701e-63
ENSG00000138468	SENP7	cg04684267	ENSG00000121413	ZSCAN18	-64707	-14.166694763583743	3.035921650234546e-44
ENSG00000138468	SENP7	cg04684267	ENSG00000176293	ZNF135	-96824	-11.754539697384507	2.8775018548605624e-31
ENSG00000138468	SENP7	cg04684267	ENSG00000171606	ZNF274	0	-10.916046810585796	2.877471104899397e-27
ENSG00000138468	SENP7	cg04684267	ENSG00000152454	ZNF256	-235458	-9.45175537292709	6.196976645426604e-21
ENSG00000138468	SENP7	cg04684267	ENSG00000181894	ZNF329	-28024	-8.188741352168453	3.759826266825798e-16
ENSG00000138468	SENP7	cg04684267	ENSG00000198131	ZNF544	45456	-7.3480543228250985	2.5350698943307497e-13
ENSG00000138468	SENP7	cg04684267	ENSG00000176593	CTD-2368P22.1	-171901	-6.3167324555864965	3.0374575725991314e-10
ENSG00000138468	SENP7	cg04684267	ENSG00000166704	ZNF606	-179784	-5.721459920437063	1.1526052383766971e-8
ENSG00000138468	SENP7	cg04818919	ENSG00000188227	ZNF793	0	-8.348990537505687	1.0083668006784285e-16
ENSG00000138468	SENP7	cg04818919	ENSG00000181666	HKR1	-137903	-4.5688239667138655	5.088379820248473e-6
ENSG00000138468	SENP7	cg05023114	ENSG00000179909	ZNF154	32428	9.758360254688135	3.432050085953568e-22
ENSG00000138468	SENP7	cg05023114	ENSG00000121417	ZNF211	-22157	8.852260272286749	1.385937615427416e-18
ENSG00000138468	SENP7	cg05023114	ENSG00000083814	ZNF671	54812	7.919339139254993	3.2564673695446702e-15
ENSG00000138468	SENP7	cg05023114	ENSG00000204514	ZNF814	183792	6.275548802216657	3.948518367411173e-10
ENSG00000138468	SENP7	cg05023114	ENSG00000183647	ZNF530	-52214	5.467209774589141	4.919531955147916e-8
ENSG00000138468	SENP7	cg05023114	ENSG00000213762	ZNF134	-41580	5.164964465718666	2.550668809891351e-7
ENSG00000138468	SENP7	cg05023114	ENSG00000204519	ZNF551	17030	5.134926943321062	2.989773555815772e-7
ENSG00000138468	SENP7	cg05023114	ENSG00000171649	ZIK1	-71159	5.125309263707236	3.145198610106699e-7
ENSG00000138468	SENP7	cg05220114	ENSG00000196724	ZNF418	209557	-13.286808961403889	2.9117648469803036e-39
ENSG00000138468	SENP7	cg05220114	ENSG00000179909	ZNF154	-3113	-13.230324132606318	5.947569559942072e-39
ENSG00000138468	SENP7	cg05220114	ENSG00000083814	ZNF671	7424	-13.16534274054601	1.3481320780764234e-38
ENSG00000138468	SENP7	cg05220114	ENSG00000204514	ZNF814	136404	-9.65005374761535	9.6312409035769e-22
ENSG00000138468	SENP7	cg05220114	ENSG00000121417	ZNF211	-69545	-9.415875330389849	8.645904640875299e-21
ENSG00000138468	SENP7	cg05220114	ENSG00000204519	ZNF551	0	-7.77820692139714	9.822899933803674e-15
ENSG00000138468	SENP7	cg05220114	ENSG00000213762	ZNF134	-88968	-7.218556422255473	6.520966856212326e-13
ENSG00000138468	SENP7	cg05220114	ENSG00000171649	ZIK1	-118547	-6.998039794111256	3.1430617715643263e-12
ENSG00000138468	SENP7	cg05220114	ENSG00000152454	ZNF256	228506	-6.489700601251783	9.91900100052876e-11
ENSG00000138468	SENP7	cg05220114	ENSG00000105136	ZNF419	-217644	-6.129506268834145	9.881686898552972e-10
ENSG00000138468	SENP7	cg05220114	ENSG00000197128	ZNF772	-234754	-5.816804183034788	6.584256893835535e-9
ENSG00000138468	SENP7	cg05220114	ENSG00000152443	ZNF776	34469	-4.907843413235185	9.66469069651168e-7
ENSG00000138468	SENP7	cg05220114	ENSG00000152439	ZNF773	-193920	-4.851010752410397	1.2864901188376055e-6
ENSG00000138468	SENP7	cg05220114	ENSG00000083828	ZNF586	57328	4.746989791416931	2.1544439621772917e-6
ENSG00000138468	SENP7	cg05220114	ENSG00000183647	ZNF530	-99602	-4.3395774137505505	1.4713609055657422e-5
ENSG00000138468	SENP7	cg05280698	ENSG00000181666	HKR1	0	-40.81609026716606	4.885950278787328e-294
ENSG00000138468	SENP7	cg05280698	ENSG00000245680	ZNF585B	-116332	-8.18585402549103	3.8492061299018963e-16
ENSG00000138468	SENP7	cg05280698	ENSG00000180479	ZNF571	220294	-4.379430672062978	1.22771133387813e-5
ENSG00000138468	SENP7	cg05508084	ENSG00000166770	ZNF667-AS1	219	-10.873190612133046	4.53119313355986e-27
ENSG00000138468	SENP7	cg05508084	ENSG00000127903	ZNF835	185620	-8.68259197133787	6.03610163693268e-18
ENSG00000138468	SENP7	cg05508084	ENSG00000196867	ZFP28	61917	-6.413969546106893	1.624716626731861e-10
ENSG00000138468	SENP7	cg05661282	ENSG00000179909	ZNF154	0	-24.680853919131316	2.376374292521707e-123
ENSG00000138468	SENP7	cg05661282	ENSG00000196724	ZNF418	212880	-18.018181535261736	3.1032552062775977e-69
ENSG00000138468	SENP7	cg05661282	ENSG00000083814	ZNF671	10747	-16.888674235465015	2.18781495858299e-61
ENSG00000138468	SENP7	cg05661282	ENSG00000204519	ZNF551	0	-14.303295843728488	4.82835170055132e-45
ENSG00000138468	SENP7	cg05661282	ENSG00000204514	ZNF814	139727	-11.437264126000255	1.0096186701375811e-29
ENSG00000138468	SENP7	cg05661282	ENSG00000121417	ZNF211	-66222	-10.796327795460765	1.0188719190038027e-26
ENSG00000138468	SENP7	cg05661282	ENSG00000171649	ZIK1	-115224	-10.67134436967153	3.762418897438385e-26
ENSG00000138468	SENP7	cg05661282	ENSG00000152454	ZNF256	231829	-10.241505931884056	3.0228639559903952e-24
ENSG00000138468	SENP7	cg05661282	ENSG00000213762	ZNF134	-85645	-9.993433915018677	3.524137553604141e-23
ENSG00000138468	SENP7	cg05661282	ENSG00000197128	ZNF772	-231431	-9.091552530164217	1.6634565749833077e-19
ENSG00000138468	SENP7	cg05661282	ENSG00000152443	ZNF776	37792	-7.862266378600212	5.10056269138702e-15
ENSG00000138468	SENP7	cg05661282	ENSG00000105136	ZNF419	-214321	-6.613442629780002	4.3777665639038524e-11
ENSG00000138468	SENP7	cg05661282	ENSG00000121406	ZNF549	-151459	-6.147617600118453	8.828730363357425e-10
ENSG00000138468	SENP7	cg05661282	ENSG00000183647	ZNF530	-96279	-5.95631234827915	2.8574693579367027e-9
ENSG00000138468	SENP7	cg05661282	ENSG00000152439	ZNF773	-190597	-5.8541436954986805	5.275430870453321e-9
ENSG00000138468	SENP7	cg05661282	ENSG00000173480	ZNF417	191292	-5.543387266249738	3.2053348850090525e-8
ENSG00000138468	SENP7	cg05661282	ENSG00000083817	ZNF416	-130074	-4.937665007154774	8.30763887371592e-7
ENSG00000138468	SENP7	cg05974498	ENSG00000161551	ZNF577	-205052	-13.058101353921682	5.162446834161911e-38
ENSG00000138468	SENP7	cg05974498	ENSG00000256087	ZNF432	-264	-8.830841329641258	1.671268233241098e-18
ENSG00000138468	SENP7	cg05974498	ENSG00000197608	ZNF841	-237	-8.282600366932042	1.7444517307565545e-16
ENSG00000138468	SENP7	cg05974498	ENSG00000198093	ZNF649	-190962	-8.01389239624636	1.5381896285899247e-15
ENSG00000138468	SENP7	cg05983315	ENSG00000196724	ZNF418	-99075	-8.821432911659546	1.8142661994870356e-18
ENSG00000138468	SENP7	cg05983315	ENSG00000121413	ZSCAN18	49366	-8.023046384724768	1.4298253956101023e-15
ENSG00000138468	SENP7	cg05983315	ENSG00000176293	ZNF135	24768	-7.882602115356878	4.348442166241095e-15
ENSG00000138468	SENP7	cg05983315	ENSG00000181894	ZNF329	91780	-5.071138828437624	4.1774095362608816e-7
ENSG00000138468	SENP7	cg05983315	ENSG00000152454	ZNF256	-86793	-5.04898346127003	4.6878369208179585e-7
ENSG00000138468	SENP7	cg06368093	ENSG00000196724	ZNF418	-66764	-17.193445364143642	1.8346547118289144e-63
ENSG00000138468	SENP7	cg06368093	ENSG00000121413	ZSCAN18	81677	-15.12173673756706	5.764220163736793e-50
ENSG00000138468	SENP7	cg06368093	ENSG00000176293	ZNF135	57079	-13.147731875902185	1.681828190892717e-38
ENSG00000138468	SENP7	cg06368093	ENSG00000176593	CTD-2368P22.1	0	-11.352909236351127	2.561618817724228e-29
ENSG00000138468	SENP7	cg06368093	ENSG00000173480	ZNF417	-85547	-9.57124354692009	2.027042723506429e-21
ENSG00000138468	SENP7	cg06368093	ENSG00000181894	ZNF329	124091	-9.2263034685397	4.92616893292896e-20
ENSG00000138468	SENP7	cg06368093	ENSG00000171606	ZNF274	180868	-9.04350803752418	2.5568273690454493e-19
ENSG00000138468	SENP7	cg06368093	ENSG00000204514	ZNF814	-113083	-8.463211750008954	3.8899396841892363e-17
ENSG00000138468	SENP7	cg06368093	ENSG00000152454	ZNF256	-54482	-7.796221410937427	8.540507103701868e-15
ENSG00000138468	SENP7	cg06368093	ENSG00000166704	ZNF606	0	-7.131252658978388	1.2220691624183214e-12
ENSG00000138468	SENP7	cg06368093	ENSG00000198131	ZNF544	226432	-5.685904516589733	1.4171318954071813e-8
ENSG00000138468	SENP7	cg06368093	ENSG00000152443	ZNF776	-243998	-5.4014178555035155	7.0907821517618e-8
ENSG00000138468	SENP7	cg06442489	ENSG00000196724	ZNF418	-183850	-9.75767071633645	3.45478677195264e-22
ENSG00000138468	SENP7	cg06442489	ENSG00000121413	ZSCAN18	-817	-9.72239578614731	4.8402973833760955e-22
ENSG00000138468	SENP7	cg06442489	ENSG00000204514	ZNF814	-230169	-6.8608320715665805	8.172656640140656e-12
ENSG00000138468	SENP7	cg06442489	ENSG00000181894	ZNF329	7005	-6.710912604078017	2.2753803655854493e-11
ENSG00000138468	SENP7	cg06442489	ENSG00000198131	ZNF544	109346	-5.63398214871161	1.912113552852121e-8
ENSG00000138468	SENP7	cg06442489	ENSG00000176293	ZNF135	-32934	-5.3307943046036845	1.0450784288327935e-7
ENSG00000138468	SENP7	cg06442489	ENSG00000171606	ZNF274	63782	-4.836678285393706	1.3820499397857402e-6
ENSG00000138468	SENP7	cg06458239	ENSG00000179909	ZNF154	170160	-9.240314575169156	4.3365399460414074e-20
ENSG00000138468	SENP7	cg06458239	ENSG00000131845	ZNF304	-167306	-7.007425444482264	2.9422814413643914e-12
ENSG00000138468	SENP7	cg06458239	ENSG00000083814	ZNF671	192544	-6.958406536808418	4.149715758202647e-12
ENSG00000138468	SENP7	cg06458239	ENSG00000152443	ZNF776	219589	-6.360103945157938	2.3003000395855022e-10
ENSG00000138468	SENP7	cg06458239	ENSG00000213762	ZNF134	87026	-5.331220696128855	1.0426486162703529e-7
ENSG00000138468	SENP7	cg06458239	ENSG00000171649	ZIK1	51249	-5.2856373905627185	1.3359410707558058e-7
ENSG00000138468	SENP7	cg06458239	ENSG00000204519	ZNF551	154762	-5.242936146731623	1.6821214549300972e-7
ENSG00000138468	SENP7	cg06458239	ENSG00000121417	ZNF211	103186	-4.984828414617276	6.528467151182973e-7
ENSG00000138468	SENP7	cg06458239	ENSG00000197128	ZNF772	-49634	-4.79095334465282	1.7347410106223528e-6
ENSG00000138468	SENP7	cg06458239	ENSG00000152433	ZNF547	-147639	-4.762903140885612	1.992348774038311e-6
ENSG00000138468	SENP7	cg06484123	ENSG00000167766	ZNF83	0	-13.878094800167888	1.4035836114771036e-42
ENSG00000138468	SENP7	cg06484123	ENSG00000198538	ZNF28	193460	-7.034937774842977	2.423486347849041e-12
ENSG00000138468	SENP7	cg06484123	ENSG00000167555	ZNF528	-185534	-6.385748727341913	1.9500232078627102e-10
ENSG00000138468	SENP7	cg06484123	ENSG00000198482	ZNF808	-39482	-6.056292255399499	1.553355841350235e-9
ENSG00000138468	SENP7	cg06484123	ENSG00000221923	ZNF880	-218151	-5.1265955485287815	3.123968507534653e-7
ENSG00000138468	SENP7	cg06484123	ENSG00000213020	ZNF611	98864	-5.077449974705578	4.0421148591615886e-7
ENSG00000138468	SENP7	cg06484123	ENSG00000167562	ZNF701	-16772	-4.918477754003493	9.157935029392188e-7
ENSG00000138468	SENP7	cg06484123	ENSG00000204604	ZNF468	234059	-4.291811275809372	1.824304724904777e-5
ENSG00000138468	SENP7	cg06585566	ENSG00000127903	ZNF835	-93642	-11.482598703061708	6.10552501739219e-30
ENSG00000138468	SENP7	cg06585566	ENSG00000196867	ZFP28	-208624	-7.793208397079239	8.742880505042197e-15
ENSG00000138468	SENP7	cg06585566	ENSG00000197016	ZNF470	-176514	-4.856543915461092	1.2513271146334776e-6
ENSG00000138468	SENP7	cg06615754	ENSG00000179909	ZNF154	15662	-24.4091459851735	6.618254587905616e-121
ENSG00000138468	SENP7	cg06615754	ENSG00000196724	ZNF418	240179	-23.373118442456345	9.345215237757579e-112
ENSG00000138468	SENP7	cg06615754	ENSG00000083814	ZNF671	38046	-20.95955219290801	1.4800194667055352e-91
ENSG00000138468	SENP7	cg06615754	ENSG00000204519	ZNF551	264	-16.07836462008958	5.125528479901538e-56
ENSG00000138468	SENP7	cg06615754	ENSG00000204514	ZNF814	167026	-15.356216985329873	2.027116136813407e-51
ENSG00000138468	SENP7	cg06615754	ENSG00000121417	ZNF211	-38923	-14.665800398306912	3.4081735735079893e-47
ENSG00000138468	SENP7	cg06615754	ENSG00000213762	ZNF134	-58346	-13.398501168124117	7.036610134834187e-40
ENSG00000138468	SENP7	cg06615754	ENSG00000171649	ZIK1	-87925	-12.571865003423891	2.0110796079925792e-35
ENSG00000138468	SENP7	cg06615754	ENSG00000197128	ZNF772	-204132	-11.325252284664812	3.471338336179701e-29
ENSG00000138468	SENP7	cg06615754	ENSG00000152443	ZNF776	65091	-9.464256960457572	5.5165440973258624e-21
ENSG00000138468	SENP7	cg06615754	ENSG00000105136	ZNF419	-187022	-9.410985316083208	9.046538353500891e-21
ENSG00000138468	SENP7	cg06615754	ENSG00000183647	ZNF530	-68980	-8.215609642742889	3.020358244315658e-16
ENSG00000138468	SENP7	cg06615754	ENSG00000173480	ZNF417	218591	-8.195623499056182	3.5549521463679417e-16
ENSG00000138468	SENP7	cg06615754	ENSG00000152439	ZNF773	-163298	-7.6459975765722845	2.717182988038992e-14
ENSG00000138468	SENP7	cg06615754	ENSG00000121406	ZNF549	-124160	-7.094517501889549	1.588364384894842e-12
ENSG00000138468	SENP7	cg06615754	ENSG00000083817	ZNF416	-102775	-6.209151991725137	6.006799641325064e-10
ENSG00000138468	SENP7	cg06615754	ENSG00000269343	ZNF587B	138026	-5.1555965123718455	2.680453216575991e-7
ENSG00000138468	SENP7	cg06707978	ENSG00000171649	ZIK1	0	-13.527530144532253	1.3463423393517462e-40
ENSG00000138468	SENP7	cg06707978	ENSG00000197128	ZNF772	-106216	-9.494350997257268	4.166953937291969e-21
ENSG00000138468	SENP7	cg06707978	ENSG00000179909	ZNF154	113578	-7.976666048633181	2.0686408537490164e-15
ENSG00000138468	SENP7	cg06707978	ENSG00000083814	ZNF671	135962	-7.760226694280291	1.1291444743625092e-14
ENSG00000138468	SENP7	cg06707978	ENSG00000213762	ZNF134	30444	-6.498077444104276	9.38898353027679e-11
ENSG00000138468	SENP7	cg06707978	ENSG00000152433	ZNF547	-204221	-6.177657373691586	7.3188262700784e-10
ENSG00000138468	SENP7	cg06707978	ENSG00000251369	ZNF550	-23923	5.569457415648359	2.764745030604994e-8
ENSG00000138468	SENP7	cg06707978	ENSG00000131845	ZNF304	-223888	-5.502731991552919	4.0314658340929674e-8
ENSG00000138468	SENP7	cg06707978	ENSG00000121417	ZNF211	46604	-5.3221429787593015	1.0955793033115382e-7
ENSG00000138468	SENP7	cg06707978	ENSG00000204519	ZNF551	98180	-5.298861116406434	1.2435004717364126e-7
ENSG00000138468	SENP7	cg06707978	ENSG00000183647	ZNF530	16096	-5.254016018380638	1.5847603442367936e-7
ENSG00000138468	SENP7	cg06878361	ENSG00000161551	ZNF577	0	-27.097231198056406	7.106654315885633e-146
ENSG00000138468	SENP7	cg06878361	ENSG00000198093	ZNF649	1665	-16.500875280027113	8.658470932579801e-59
ENSG00000138468	SENP7	cg06878361	ENSG00000197608	ZNF841	176907	-5.180768181912397	2.345366319355173e-7
ENSG00000138468	SENP7	cg06940614	ENSG00000198182	ZNF607	4489	-9.6690846553023	8.0403406430403915e-22
ENSG00000138468	SENP7	cg06942685	ENSG00000166770	ZNF667-AS1	109185	-7.962350787727824	2.3174908075416317e-15
ENSG00000138468	SENP7	cg06942685	ENSG00000196867	ZFP28	170883	-7.099740443943431	1.5303683691278415e-12
ENSG00000138468	SENP7	cg06942685	ENSG00000197016	ZNF470	199446	-5.032090862242239	5.11693850346904e-7
ENSG00000138468	SENP7	cg07237326	ENSG00000181666	HKR1	60998	-10.600187649444818	7.866360820693296e-26
ENSG00000138468	SENP7	cg07237326	ENSG00000245680	ZNF585B	-33683	-7.666528262357467	2.3225405379535963e-14
ENSG00000138468	SENP7	cg07474494	ENSG00000196724	ZNF418	0	-20.345947988827607	1.1035526354643146e-86
ENSG00000138468	SENP7	cg07474494	ENSG00000179909	ZNF154	-226020	-12.252078385543632	9.103955327021984e-34
ENSG00000138468	SENP7	cg07474494	ENSG00000121413	ZSCAN18	148603	-11.562814342644254	2.496335317636419e-30
ENSG00000138468	SENP7	cg07474494	ENSG00000083814	ZNF671	-207607	-11.068002374369396	5.67663340223417e-28
ENSG00000138468	SENP7	cg07474494	ENSG00000176293	ZNF135	124005	-8.4791524783303	3.402470518320432e-17
ENSG00000138468	SENP7	cg07474494	ENSG00000152454	ZNF256	5599	-7.988591412904401	1.8815905245913067e-15
ENSG00000138468	SENP7	cg07474494	ENSG00000204519	ZNF551	-217930	-7.898184324522017	3.8470850620726674e-15
ENSG00000138468	SENP7	cg07474494	ENSG00000181894	ZNF329	191017	-6.738338547654396	1.8896789750507366e-11
ENSG00000138468	SENP7	cg07474494	ENSG00000204514	ZNF814	-46157	-6.1013854370523966	1.1763630082428831e-9
ENSG00000138468	SENP7	cg07474494	ENSG00000171606	ZNF274	247794	-6.046686703623859	1.6477097112795002e-9
ENSG00000138468	SENP7	cg07474494	ENSG00000152443	ZNF776	-177072	-4.5066493619127375	6.8197981507691345e-6
ENSG00000138468	SENP7	cg07685728	ENSG00000204514	ZNF814	79206	-18.045726437938672	1.9735560385370872e-69
ENSG00000138468	SENP7	cg07685728	ENSG00000083814	ZNF671	-41898	-14.081537053552033	9.477360593905973e-44
ENSG00000138468	SENP7	cg07685728	ENSG00000196724	ZNF418	152359	-13.716336209948565	1.1675679062740277e-41
ENSG00000138468	SENP7	cg07685728	ENSG00000179909	ZNF154	-60311	-13.286354491932668	2.9285770943193096e-39
ENSG00000138468	SENP7	cg07685728	ENSG00000269343	ZNF587B	50206	-11.227388845869916	1.0119608156302145e-28
ENSG00000138468	SENP7	cg07685728	ENSG00000204519	ZNF551	-52221	-9.953220280023302	5.220247837665355e-23
ENSG00000138468	SENP7	cg07685728	ENSG00000213762	ZNF134	-146166	-9.639044994324056	1.0689895013958173e-21
ENSG00000138468	SENP7	cg07685728	ENSG00000152454	ZNF256	171308	-9.512824182966213	3.506267627295514e-21
ENSG00000138468	SENP7	cg07685728	ENSG00000171649	ZIK1	-175745	-8.465596903379495	3.8128418841622026e-17
ENSG00000138468	SENP7	cg07685728	ENSG00000152443	ZNF776	-11363	-7.899462977223806	3.808568501940943e-15
ENSG00000138468	SENP7	cg07685728	ENSG00000176593	CTD-2368P22.1	232536	-7.319687345298228	3.122156488261673e-13
ENSG00000138468	SENP7	cg07685728	ENSG00000166704	ZNF606	207528	-6.740493840650501	1.8622407318449504e-11
ENSG00000138468	SENP7	cg07685728	ENSG00000121417	ZNF211	-126743	-6.621360790997157	4.1525019229331177e-11
ENSG00000138468	SENP7	cg07685728	ENSG00000173480	ZNF417	130771	-5.292750767425672	1.2854183495844453e-7
ENSG00000138468	SENP7	cg07685728	ENSG00000183647	ZNF530	-156800	-4.471472200800642	8.03588073186063e-6
ENSG00000138468	SENP7	cg07685728	ENSG00000251369	ZNF550	-209659	-4.333008041716341	1.5157131044117376e-5
ENSG00000138468	SENP7	cg07788092	ENSG00000174652	ZNF266	49579	-6.207311406225767	6.076709460426951e-10
ENSG00000138468	SENP7	cg07788092	ENSG00000188321	ZNF559	-11852	4.343709734084322	1.4440994362164493e-5
ENSG00000138468	SENP7	cg07808761	ENSG00000197863	ZNF790	0	-5.122085063190607	3.199028242238226e-7
ENSG00000138468	SENP7	cg07808761	ENSG00000251247	ZNF345	11501	-5.054786600638075	4.5486062670470683e-7
ENSG00000138468	SENP7	cg07815836	ENSG00000171606	ZNF274	0	8.30802582062336	1.4148345065882784e-16
ENSG00000138468	SENP7	cg07815836	ENSG00000176293	ZNF135	-117673	7.249030412241391	5.228364385322334e-13
ENSG00000138468	SENP7	cg07815836	ENSG00000121413	ZSCAN18	-85556	6.764849447344975	1.578054040010441e-11
ENSG00000138468	SENP7	cg07815836	ENSG00000198131	ZNF544	24607	6.035800033990664	1.761409847963751e-9
ENSG00000138468	SENP7	cg07815836	ENSG00000166704	ZNF606	-200633	4.3233706746023035	1.583092673768839e-5
ENSG00000138468	SENP7	cg07816786	ENSG00000232677	LINC00665	-241179	-8.797390357902026	2.2369388557928048e-18
ENSG00000138468	SENP7	cg07816786	ENSG00000186020	ZNF529	0	-6.5574493315746905	6.349829074093198e-11
ENSG00000138468	SENP7	cg07894352	ENSG00000267508	ZNF285	122464	-4.879616129756341	1.1144215228529283e-6
ENSG00000138468	SENP7	cg07894352	ENSG00000263002	ZNF234	-100836	-4.821467334886741	1.4909264206130686e-6
ENSG00000138468	SENP7	cg08146323	ENSG00000127903	ZNF835	0	-15.053576369861185	1.51270915261895e-49
ENSG00000138468	SENP7	cg08146323	ENSG00000166770	ZNF667-AS1	-171082	-10.113667438917332	1.0791696747971658e-23
ENSG00000138468	SENP7	cg08146323	ENSG00000196867	ZFP28	-114948	-10.025036546511437	2.5852885705334352e-23
ENSG00000138468	SENP7	cg08146323	ENSG00000197016	ZNF470	-82838	-7.084997872973151	1.6996718812773285e-12
ENSG00000138468	SENP7	cg08158952	ENSG00000127903	ZNF835	0	-20.53075105341524	3.863038349885894e-88
ENSG00000138468	SENP7	cg08158952	ENSG00000166770	ZNF667-AS1	-170980	-12.306103166558014	4.810445719891037e-34
ENSG00000138468	SENP7	cg08158952	ENSG00000196867	ZFP28	-114846	-11.082365939620919	4.864060638665133e-28
ENSG00000138468	SENP7	cg08158952	ENSG00000197016	ZNF470	-82736	-8.096831850165318	7.912562002170108e-16
ENSG00000138468	SENP7	cg08158952	ENSG00000197951	ZNF71	-45166	-4.96362533926502	7.277438225795079e-7
ENSG00000138468	SENP7	cg08333333	ENSG00000127903	ZNF835	0	-24.695051020658273	1.7687355032248336e-123
ENSG00000138468	SENP7	cg08333333	ENSG00000166770	ZNF667-AS1	-170808	-13.891282976678532	1.1798035815355958e-42
ENSG00000138468	SENP7	cg08333333	ENSG00000196867	ZFP28	-114674	-13.157001155022495	1.4970677068501789e-38
ENSG00000138468	SENP7	cg08333333	ENSG00000197016	ZNF470	-82564	-9.98173042409756	3.951660066650345e-23
ENSG00000138468	SENP7	cg08333333	ENSG00000197951	ZNF71	-44994	-5.8540705466698855	5.277728535608902e-9
ENSG00000138468	SENP7	cg08527195	ENSG00000072694	FCGR2B	108402	-5.272335292142162	1.435624497424535e-7
ENSG00000138468	SENP7	cg08527195	ENSG00000162747	FCGR3B	150287	4.9317468264730495	8.561443846527832e-7
ENSG00000138468	SENP7	cg08648727	ENSG00000196724	ZNF418	0	-10.505325611071102	2.0880231461182454e-25
ENSG00000138468	SENP7	cg08648727	ENSG00000179909	ZNF154	-225856	-7.022576286968735	2.6444170562450497e-12
ENSG00000138468	SENP7	cg08648727	ENSG00000083814	ZNF671	-207443	-6.793205451304608	1.300443251852218e-11
ENSG00000138468	SENP7	cg08648727	ENSG00000204514	ZNF814	-45993	-5.372492413713079	8.316408868654465e-8
ENSG00000138468	SENP7	cg08648727	ENSG00000152454	ZNF256	5763	-5.288749072306669	1.3136082494545453e-7
ENSG00000138468	SENP7	cg08648727	ENSG00000121413	ZSCAN18	148767	-5.255895322236764	1.568796645945144e-7
ENSG00000138468	SENP7	cg08668790	ENSG00000179909	ZNF154	-82	-32.3185808271659	8.959678931348584e-199
ENSG00000138468	SENP7	cg08668790	ENSG00000196724	ZNF418	212588	-22.303064017024766	1.3317166524532703e-102
ENSG00000138468	SENP7	cg08668790	ENSG00000083814	ZNF671	10455	-21.51870072673921	4.316605179069627e-96
ENSG00000138468	SENP7	cg08668790	ENSG00000204519	ZNF551	0	-16.925864426676625	1.2253977123638187e-61
ENSG00000138468	SENP7	cg08668790	ENSG00000204514	ZNF814	139435	-15.652657768285053	2.7637060751341735e-53
ENSG00000138468	SENP7	cg08668790	ENSG00000121417	ZNF211	-66514	-14.348752318454332	2.6097910831869726e-45
ENSG00000138468	SENP7	cg08668790	ENSG00000152454	ZNF256	231537	-12.725185085713363	3.133528068135152e-36
ENSG00000138468	SENP7	cg08668790	ENSG00000171649	ZIK1	-115516	-12.61784676795069	1.1539947179784824e-35
ENSG00000138468	SENP7	cg08668790	ENSG00000213762	ZNF134	-85937	-12.11590505714937	4.494480858445989e-33
ENSG00000138468	SENP7	cg08668790	ENSG00000197128	ZNF772	-231723	-9.758185992108663	3.437782153112023e-22
ENSG00000138468	SENP7	cg08668790	ENSG00000152443	ZNF776	37500	-9.524842051258254	3.133271807830997e-21
ENSG00000138468	SENP7	cg08668790	ENSG00000173480	ZNF417	191000	-7.677233609522022	2.1397213098930155e-14
ENSG00000138468	SENP7	cg08668790	ENSG00000183647	ZNF530	-96571	-7.537586115531765	6.182777230309281e-14
ENSG00000138468	SENP7	cg08668790	ENSG00000105136	ZNF419	-214613	-7.424203090323218	1.4438789429301623e-13
ENSG00000138468	SENP7	cg08668790	ENSG00000121406	ZNF549	-151751	-7.168662666116949	9.34514585516479e-13
ENSG00000138468	SENP7	cg08668790	ENSG00000152439	ZNF773	-190889	-6.685093434663588	2.7084058795108554e-11
ENSG00000138468	SENP7	cg08668790	ENSG00000083817	ZNF416	-130366	-5.87461274104893	4.6693147677637654e-9
ENSG00000138468	SENP7	cg08668790	ENSG00000269343	ZNF587B	110435	-4.366396017168114	1.3028146568145949e-5
ENSG00000138468	SENP7	cg09259115	ENSG00000197863	ZNF790	19535	-4.66548948200607	3.2039495297241644e-6
ENSG00000138468	SENP7	cg09547119	ENSG00000161551	ZNF577	0	-32.01173442900192	1.590093781082154e-195
ENSG00000138468	SENP7	cg09547119	ENSG00000198093	ZNF649	1108	-19.142893061406216	1.861849651349683e-77
ENSG00000138468	SENP7	cg09547119	ENSG00000197608	ZNF841	176350	-6.389217594985053	1.906841171007174e-10
ENSG00000138468	SENP7	cg09547119	ENSG00000256087	ZNF432	143263	-4.8744905199850175	1.1435298080885478e-6
ENSG00000138468	SENP7	cg09578475	ENSG00000174652	ZNF266	49582	-6.793694542230855	1.2961019172166603e-11
ENSG00000138468	SENP7	cg09578475	ENSG00000188321	ZNF559	-11849	4.417791262293007	1.029922780087902e-5
ENSG00000138468	SENP7	cg09643544	ENSG00000174652	ZNF266	49574	-6.102554641235075	1.1678846127468213e-9
ENSG00000138468	SENP7	cg10051935	ENSG00000198131	ZNF544	0	-14.236527172621026	1.188297828102756e-44
ENSG00000138468	SENP7	cg10051935	ENSG00000121413	ZSCAN18	-110754	-11.841803515693815	1.0649653512556416e-31
ENSG00000138468	SENP7	cg10051935	ENSG00000181894	ZNF329	-74071	-9.170192682490596	8.193229896145631e-20
ENSG00000138468	SENP7	cg10051935	ENSG00000171606	ZNF274	-15620	-8.819082908125345	1.8518305771843764e-18
ENSG00000138468	SENP7	cg10051935	ENSG00000176293	ZNF135	-142871	-8.700687771610049	5.1659565548326736e-18
ENSG00000138468	SENP7	cg10051935	ENSG00000166704	ZNF606	-225831	-4.500867894036926	7.006778704798075e-6
ENSG00000138468	SENP7	cg10132208	ENSG00000121413	ZSCAN18	49661	-7.8769395804615545	4.5461406482470454e-15
ENSG00000138468	SENP7	cg10132208	ENSG00000176293	ZNF135	25063	-7.459453165320587	1.1106365346257408e-13
ENSG00000138468	SENP7	cg10132208	ENSG00000196724	ZNF418	-98780	-7.026626757558784	2.5699320629898215e-12
ENSG00000138468	SENP7	cg10635122	ENSG00000161551	ZNF577	0	-28.83795967611768	6.503286764927285e-163
ENSG00000138468	SENP7	cg10635122	ENSG00000198093	ZNF649	1385	-17.562462747908654	5.110158384777292e-66
ENSG00000138468	SENP7	cg10635122	ENSG00000197608	ZNF841	176627	-5.72139857227241	1.153017389029142e-8
ENSG00000138468	SENP7	cg10705236	ENSG00000152433	ZNF547	-10811	-7.970843416879918	2.16651092346852e-15
ENSG00000138468	SENP7	cg10705236	ENSG00000131845	ZNF304	-30478	-7.240641599118284	5.556679046298427e-13
ENSG00000138468	SENP7	cg10705236	ENSG00000213762	ZNF134	223854	-5.536695772593776	3.328982819285801e-8
ENSG00000138468	SENP7	cg10705236	ENSG00000178229	ZNF543	-59600	-5.489054070345368	4.353275939527615e-8
ENSG00000138468	SENP7	cg10705236	ENSG00000171649	ZIK1	188077	-5.370140549286533	8.424626196321494e-8
ENSG00000138468	SENP7	cg10705236	ENSG00000105136	ZNF419	97332	-5.155662181119085	2.679521608208806e-7
ENSG00000138468	SENP7	cg10705236	ENSG00000121417	ZNF211	240014	-5.0200714369023896	5.445071011562511e-7
ENSG00000138468	SENP7	cg10783469	ENSG00000161551	ZNF577	0	-27.92201889276067	7.225664972901024e-154
ENSG00000138468	SENP7	cg10783469	ENSG00000198093	ZNF649	1241	-17.861417925773697	4.03534877822993e-68
ENSG00000138468	SENP7	cg10783469	ENSG00000197608	ZNF841	176483	-5.418715855563606	6.443506382084221e-8
ENSG00000138468	SENP7	cg11269599	ENSG00000161551	ZNF577	0	-32.25070721743789	4.702814062935595e-198
ENSG00000138468	SENP7	cg11269599	ENSG00000198093	ZNF649	1171	-19.40290685026635	2.0557574383986646e-79
ENSG00000138468	SENP7	cg11269599	ENSG00000197608	ZNF841	176413	-6.062046117271246	1.4993818976431503e-9
ENSG00000138468	SENP7	cg11269599	ENSG00000256087	ZNF432	143326	-4.955647486329819	7.580152453228973e-7
ENSG00000138468	SENP7	cg11294513	ENSG00000179909	ZNF154	0	-31.83964359513033	1.0390958441953615e-193
ENSG00000138468	SENP7	cg11294513	ENSG00000196724	ZNF418	212955	-22.040360932398023	2.1091995158802625e-100
ENSG00000138468	SENP7	cg11294513	ENSG00000083814	ZNF671	10822	-21.617039616784737	6.7347072209658e-97
ENSG00000138468	SENP7	cg11294513	ENSG00000204519	ZNF551	0	-16.470270675391458	1.3812747976025552e-58
ENSG00000138468	SENP7	cg11294513	ENSG00000204514	ZNF814	139802	-15.451750245189329	5.117405218553487e-52
ENSG00000138468	SENP7	cg11294513	ENSG00000121417	ZNF211	-66147	-14.007653761781274	2.5323077002978175e-43
ENSG00000138468	SENP7	cg11294513	ENSG00000171649	ZIK1	-115149	-13.129368524198064	2.1174510575595256e-38
ENSG00000138468	SENP7	cg11294513	ENSG00000152454	ZNF256	231904	-11.97133225940282	2.405831656232399e-32
ENSG00000138468	SENP7	cg11294513	ENSG00000213762	ZNF134	-85570	-11.430646753876227	1.0863658470327015e-29
ENSG00000138468	SENP7	cg11294513	ENSG00000197128	ZNF772	-231356	-10.600702904757533	7.824588939685479e-26
ENSG00000138468	SENP7	cg11294513	ENSG00000152443	ZNF776	37867	-9.706718099727333	5.620874568545424e-22
ENSG00000138468	SENP7	cg11294513	ENSG00000105136	ZNF419	-214246	-8.650634945097869	7.940141277710611e-18
ENSG00000138468	SENP7	cg11294513	ENSG00000173480	ZNF417	191367	-7.491456350907245	8.743267286107143e-14
ENSG00000138468	SENP7	cg11294513	ENSG00000152439	ZNF773	-190522	-7.352351860636395	2.456157671728822e-13
ENSG00000138468	SENP7	cg11294513	ENSG00000121406	ZNF549	-151384	-7.11791577760948	1.344295081718173e-12
ENSG00000138468	SENP7	cg11294513	ENSG00000183647	ZNF530	-96204	-6.892705859688827	6.55599529401189e-12
ENSG00000138468	SENP7	cg11294513	ENSG00000083817	ZNF416	-129999	-6.379669056222498	2.028022560805764e-10
ENSG00000138468	SENP7	cg11312896	ENSG00000196724	ZNF418	-98360	-10.544167224963116	1.4014088510658843e-25
ENSG00000138468	SENP7	cg11312896	ENSG00000121413	ZSCAN18	50081	-9.213494054064098	5.534247335999109e-20
ENSG00000138468	SENP7	cg11312896	ENSG00000176293	ZNF135	25483	-8.057371918923556	1.0864589411913185e-15
ENSG00000138468	SENP7	cg11312896	ENSG00000181894	ZNF329	92495	-6.193422586758185	6.630468936741078e-10
ENSG00000138468	SENP7	cg11312896	ENSG00000152454	ZNF256	-86078	-5.716193036251837	1.1885161760427683e-8
ENSG00000138468	SENP7	cg11312896	ENSG00000198131	ZNF544	194836	-5.051522698316046	4.6264160230548567e-7
ENSG00000138468	SENP7	cg11312896	ENSG00000176593	CTD-2368P22.1	-22521	-5.022073467954839	5.389040870371543e-7
ENSG00000138468	SENP7	cg11312896	ENSG00000171606	ZNF274	149272	-4.766004383306016	1.962154227959558e-6
ENSG00000138468	SENP7	cg11312896	ENSG00000173480	ZNF417	-117143	-4.601568276983931	4.354693558056683e-6
ENSG00000138468	SENP7	cg11335411	ENSG00000196724	ZNF418	-247349	-17.175344730602344	2.441939068503171e-63
ENSG00000138468	SENP7	cg11335411	ENSG00000121413	ZSCAN18	-64316	-14.954321645028555	6.123627610006407e-49
ENSG00000138468	SENP7	cg11335411	ENSG00000171606	ZNF274	283	-12.120336258440139	4.267994029912368e-33
ENSG00000138468	SENP7	cg11335411	ENSG00000176293	ZNF135	-96433	-11.018399373653553	9.664411860363749e-28
ENSG00000138468	SENP7	cg11335411	ENSG00000152454	ZNF256	-235067	-9.281917626414536	2.9667927593780037e-20
ENSG00000138468	SENP7	cg11335411	ENSG00000181894	ZNF329	-27633	-9.151454995988985	9.704200843541098e-20
ENSG00000138468	SENP7	cg11335411	ENSG00000176593	CTD-2368P22.1	-171510	-6.401482560559071	1.7615267100475477e-10
ENSG00000138468	SENP7	cg11335411	ENSG00000166704	ZNF606	-179393	-6.198459029614054	6.424193837068591e-10
ENSG00000138468	SENP7	cg11546251	ENSG00000204514	ZNF814	38019	-9.173626070327362	7.942760407366237e-20
ENSG00000138468	SENP7	cg11546251	ENSG00000083814	ZNF671	-83085	-7.46666614350998	1.052425306062253e-13
ENSG00000138468	SENP7	cg11546251	ENSG00000196724	ZNF418	111172	-7.172940802751524	9.062040893346369e-13
ENSG00000138468	SENP7	cg11546251	ENSG00000179909	ZNF154	-101498	-6.135181175279563	9.539226931463921e-10
ENSG00000138468	SENP7	cg11546251	ENSG00000083828	ZNF586	0	5.665777058219951	1.592118550598395e-8
ENSG00000138468	SENP7	cg11546251	ENSG00000213762	ZNF134	-187353	-5.482000890280922	4.528821382429502e-8
ENSG00000138468	SENP7	cg11546251	ENSG00000152443	ZNF776	-52550	-5.046542808820295	4.7476143698127535e-7
ENSG00000138468	SENP7	cg11546251	ENSG00000204519	ZNF551	-93408	-4.936421340484852	8.360365228361468e-7
ENSG00000138468	SENP7	cg11546251	ENSG00000269343	ZNF587B	9019	-4.899176042720848	1.0097589013105699e-6
ENSG00000138468	SENP7	cg11546251	ENSG00000152454	ZNF256	130121	-4.416870467475203	1.0342915859217916e-5
ENSG00000138468	SENP7	cg11546251	ENSG00000171649	ZIK1	-216932	-4.3981255912114134	1.1271739821525474e-5
ENSG00000138468	SENP7	cg11546251	ENSG00000121417	ZNF211	-167930	-4.347163719311578	1.4216834329935076e-5
ENSG00000138468	SENP7	cg11680826	ENSG00000181666	HKR1	93643	-7.807193328375085	7.841791778269183e-15
ENSG00000138468	SENP7	cg11680826	ENSG00000245680	ZNF585B	-1038	-6.122337024529606	1.0331508205299753e-9
ENSG00000138468	SENP7	cg11788523	ENSG00000196724	ZNF418	-8	-25.228710301993683	2.4588158435526366e-128
ENSG00000138468	SENP7	cg11788523	ENSG00000179909	ZNF154	-226190	-13.950543443840463	5.3963438520407424e-43
ENSG00000138468	SENP7	cg11788523	ENSG00000121413	ZSCAN18	148433	-12.803319388355835	1.2056259014245168e-36
ENSG00000138468	SENP7	cg11788523	ENSG00000083814	ZNF671	-207777	-11.679403954226718	6.73576799981024e-31
ENSG00000138468	SENP7	cg11788523	ENSG00000176293	ZNF135	123835	-10.326526745308295	1.2862516099343372e-24
ENSG00000138468	SENP7	cg11788523	ENSG00000152454	ZNF256	5429	-8.48455703693518	3.2512962625614636e-17
ENSG00000138468	SENP7	cg11788523	ENSG00000181894	ZNF329	190847	-8.02680150424534	1.387581009874745e-15
ENSG00000138468	SENP7	cg11788523	ENSG00000171606	ZNF274	247624	-6.9610571903774465	4.0735049956089675e-12
ENSG00000138468	SENP7	cg11788523	ENSG00000204519	ZNF551	-218100	-6.868115033827366	7.771900835483694e-12
ENSG00000138468	SENP7	cg11788523	ENSG00000204514	ZNF814	-46327	-6.818168117397774	1.0960882752391963e-11
ENSG00000138468	SENP7	cg11788523	ENSG00000152443	ZNF776	-177242	-4.825477516759385	1.4614473330139682e-6
ENSG00000138468	SENP7	cg11909748	ENSG00000221923	ZNF880	-67625	-4.457891108453171	8.55875538067868e-6
ENSG00000138468	SENP7	cg11998703	ENSG00000196724	ZNF418	0	-23.535449900046444	3.591471221299029e-113
ENSG00000138468	SENP7	cg11998703	ENSG00000179909	ZNF154	-226089	-13.579203241969516	6.915557885510308e-41
ENSG00000138468	SENP7	cg11998703	ENSG00000121413	ZSCAN18	148534	-12.279746298189218	6.5687519328511575e-34
ENSG00000138468	SENP7	cg11998703	ENSG00000083814	ZNF671	-207676	-12.246594615919072	9.711588428238254e-34
ENSG00000138468	SENP7	cg11998703	ENSG00000152454	ZNF256	5530	-10.301620897673649	1.6531983414973845e-24
ENSG00000138468	SENP7	cg11998703	ENSG00000176293	ZNF135	123936	-10.300300031841134	1.6753243707468747e-24
ENSG00000138468	SENP7	cg11998703	ENSG00000181894	ZNF329	190948	-8.703683075955558	5.034399706332515e-18
ENSG00000138468	SENP7	cg11998703	ENSG00000204519	ZNF551	-217999	-7.68838711144781	1.9643155740806962e-14
ENSG00000138468	SENP7	cg11998703	ENSG00000171606	ZNF274	247725	-7.311898960751743	3.3054863037745396e-13
ENSG00000138468	SENP7	cg11998703	ENSG00000204514	ZNF814	-46226	-7.082985540349739	1.7241630365090525e-12
ENSG00000138468	SENP7	cg11998703	ENSG00000152443	ZNF776	-177141	-5.674713027311398	1.5119817369422e-8
ENSG00000138468	SENP7	cg12024906	ENSG00000181666	HKR1	0	-35.8045131438628	1.0086685065569235e-236
ENSG00000138468	SENP7	cg12024906	ENSG00000245680	ZNF585B	-116623	-6.5482352519524	6.748649560602279e-11
ENSG00000138468	SENP7	cg12227172	ENSG00000161551	ZNF577	0	-25.18402767412658	6.310501779752112e-128
ENSG00000138468	SENP7	cg12227172	ENSG00000198093	ZNF649	1064	-14.599391378601696	8.513741819340071e-47
ENSG00000138468	SENP7	cg12227172	ENSG00000197608	ZNF841	176306	-5.78298621957787	8.038688660658609e-9
ENSG00000138468	SENP7	cg12227172	ENSG00000256087	ZNF432	143219	-5.093175888036414	3.7231393422805473e-7
ENSG00000138468	SENP7	cg12259537	ENSG00000196724	ZNF418	-67932	-16.26660491779638	3.034387902109371e-57
ENSG00000138468	SENP7	cg12259537	ENSG00000176593	CTD-2368P22.1	0	-14.810470663616556	4.58098417208629e-48
ENSG00000138468	SENP7	cg12259537	ENSG00000121413	ZSCAN18	80509	-13.7913754813867	4.381825725578879e-42
ENSG00000138468	SENP7	cg12259537	ENSG00000176293	ZNF135	55911	-12.776915702892648	1.665885391312023e-36
ENSG00000138468	SENP7	cg12259537	ENSG00000173480	ZNF417	-86715	-10.797791292217434	1.0033222733772375e-26
ENSG00000138468	SENP7	cg12259537	ENSG00000166704	ZNF606	0	-8.79153869899358	2.3537269498730875e-18
ENSG00000138468	SENP7	cg12259537	ENSG00000171606	ZNF274	179700	-7.814547408173999	7.405297627709138e-15
ENSG00000138468	SENP7	cg12259537	ENSG00000181894	ZNF329	122923	-7.6040841761896045	3.738773402489226e-14
ENSG00000138468	SENP7	cg12259537	ENSG00000152454	ZNF256	-55650	-6.811333441717001	1.1486798326189642e-11
ENSG00000138468	SENP7	cg12259537	ENSG00000204514	ZNF814	-114251	-6.312421646047647	3.1222484548984453e-10
ENSG00000138468	SENP7	cg12259537	ENSG00000152443	ZNF776	-245166	-4.580217528087903	4.820586731170876e-6
ENSG00000138468	SENP7	cg12506930	ENSG00000179909	ZNF154	-138	-32.533792680005746	4.613697855834617e-201
ENSG00000138468	SENP7	cg12506930	ENSG00000196724	ZNF418	212532	-20.945802108486003	1.9083511679291524e-91
ENSG00000138468	SENP7	cg12506930	ENSG00000083814	ZNF671	10399	-20.648313935169828	4.524211720505868e-89
ENSG00000138468	SENP7	cg12506930	ENSG00000204519	ZNF551	0	-16.251362200679793	3.8188172434770577e-57
ENSG00000138468	SENP7	cg12506930	ENSG00000204514	ZNF814	139379	-15.100563848457918	7.781705732707168e-50
ENSG00000138468	SENP7	cg12506930	ENSG00000121417	ZNF211	-66570	-13.660749357541835	2.4057855973729243e-41
ENSG00000138468	SENP7	cg12506930	ENSG00000213762	ZNF134	-85993	-11.568623840919074	2.3392520386825705e-30
ENSG00000138468	SENP7	cg12506930	ENSG00000171649	ZIK1	-115572	-10.975367815227882	1.5306612300372986e-27
ENSG00000138468	SENP7	cg12506930	ENSG00000152454	ZNF256	231481	-10.897814329655088	3.491353101842008e-27
ENSG00000138468	SENP7	cg12506930	ENSG00000197128	ZNF772	-231779	-9.40923604135787	9.19427039437937e-21
ENSG00000138468	SENP7	cg12506930	ENSG00000152443	ZNF776	37444	-9.265823486238293	3.4367121085815835e-20
ENSG00000138468	SENP7	cg12506930	ENSG00000105136	ZNF419	-214669	-7.7166564493187195	1.5806544331602268e-14
ENSG00000138468	SENP7	cg12506930	ENSG00000173480	ZNF417	190944	-7.023894004659607	2.6199557410803592e-12
ENSG00000138468	SENP7	cg12506930	ENSG00000183647	ZNF530	-96627	-6.949860012806194	4.405090794026663e-12
ENSG00000138468	SENP7	cg12506930	ENSG00000152439	ZNF773	-190945	-6.269254347870249	4.1094626822546054e-10
ENSG00000138468	SENP7	cg12506930	ENSG00000121406	ZNF549	-151807	-5.6897360924020655	1.3860075516964692e-8
ENSG00000138468	SENP7	cg12506930	ENSG00000083817	ZNF416	-130422	-5.115382100870826	3.3138001624846287e-7
ENSG00000138468	SENP7	cg12717203	ENSG00000250312	ZNF718	42	-9.928168992290828	6.663013043728462e-23
ENSG00000138468	SENP7	cg12948621	ENSG00000181666	HKR1	0	-36.386989583132525	3.1155781580813287e-243
ENSG00000138468	SENP7	cg12948621	ENSG00000245680	ZNF585B	-116390	-7.182463905676449	8.461744311993095e-13
ENSG00000138468	SENP7	cg12961842	ENSG00000196724	ZNF418	0	-15.6795012934582	1.8667055512437617e-53
ENSG00000138468	SENP7	cg12961842	ENSG00000179909	ZNF154	-226178	-9.844527134423494	1.4987684138396617e-22
ENSG00000138468	SENP7	cg12961842	ENSG00000083814	ZNF671	-207765	-8.27468223344614	1.8617918437249694e-16
ENSG00000138468	SENP7	cg12961842	ENSG00000121413	ZSCAN18	148445	-8.142113125551896	5.48952842878737e-16
ENSG00000138468	SENP7	cg12961842	ENSG00000176293	ZNF135	123847	-6.092583321313178	1.242146897723809e-9
ENSG00000138468	SENP7	cg12961842	ENSG00000152454	ZNF256	5441	-5.607510625691679	2.225454925250281e-8
ENSG00000138468	SENP7	cg12961842	ENSG00000204514	ZNF814	-46315	-5.523722008946191	3.582038491940137e-8
ENSG00000138468	SENP7	cg12961842	ENSG00000204519	ZNF551	-218088	-5.305840710774368	1.1972376705839053e-7
ENSG00000138468	SENP7	cg12961842	ENSG00000181894	ZNF329	190859	-5.294943483818906	1.270221029908472e-7
ENSG00000138468	SENP7	cg12961842	ENSG00000171606	ZNF274	247636	-4.8234457020386605	1.4763125465816191e-6
ENSG00000138468	SENP7	cg13122377	ENSG00000152433	ZNF547	191156	-12.847879625318331	6.976301938208557e-37
ENSG00000138468	SENP7	cg13122377	ENSG00000131845	ZNF304	178986	-11.521753605987815	3.948511403868055e-30
ENSG00000138468	SENP7	cg13122377	ENSG00000178229	ZNF543	148188	-10.703466891016575	2.692945869783417e-26
ENSG00000138468	SENP7	cg13122377	ENSG00000188785	ZNF548	217529	-5.994381962234193	2.2681384682264346e-9
ENSG00000138468	SENP7	cg13208922	ENSG00000250312	ZNF718	-141242	-8.87339425798948	1.1517112493506046e-18
ENSG00000138468	SENP7	cg13337047	ENSG00000152433	ZNF547	191000	-12.501039319489713	4.714624397624898e-35
ENSG00000138468	SENP7	cg13337047	ENSG00000178229	ZNF543	148032	-9.761618111688415	3.3266140154081926e-22
ENSG00000138468	SENP7	cg13337047	ENSG00000131845	ZNF304	178830	-9.503227161570265	3.835407395001381e-21
ENSG00000138468	SENP7	cg13337047	ENSG00000188785	ZNF548	217373	-5.812681281548664	6.746821391918414e-9
ENSG00000138468	SENP7	cg13337047	ENSG00000268205	CTC-444N24.11	131828	-5.110836770778414	3.393879880630108e-7
ENSG00000138468	SENP7	cg13382661	ENSG00000204514	ZNF814	79330	-12.7955268059804	1.3264340090932885e-36
ENSG00000138468	SENP7	cg13382661	ENSG00000269343	ZNF587B	50330	-10.36256950294602	8.93632626068086e-25
ENSG00000138468	SENP7	cg13382661	ENSG00000196724	ZNF418	152483	-9.050559456419263	2.4008147123273085e-19
ENSG00000138468	SENP7	cg13382661	ENSG00000083814	ZNF671	-41774	-8.92771638774599	7.142811734977967e-19
ENSG00000138468	SENP7	cg13382661	ENSG00000179909	ZNF154	-60187	-8.820442696627877	1.830001940086523e-18
ENSG00000138468	SENP7	cg13382661	ENSG00000213762	ZNF134	-146042	-6.941881983173727	4.657354626862897e-12
ENSG00000138468	SENP7	cg13382661	ENSG00000152454	ZNF256	171432	-6.735599864943676	1.9251160254025446e-11
ENSG00000138468	SENP7	cg13382661	ENSG00000204519	ZNF551	-52097	-6.619252396028405	4.211350476443227e-11
ENSG00000138468	SENP7	cg13382661	ENSG00000176593	CTD-2368P22.1	232660	-4.765866197797019	1.963490226629386e-6
ENSG00000138468	SENP7	cg13382661	ENSG00000171649	ZIK1	-175621	-4.742138628181916	2.2063287571400586e-6
ENSG00000138468	SENP7	cg13382661	ENSG00000166704	ZNF606	207652	-4.647853590527243	3.4883704426279615e-6
ENSG00000138468	SENP7	cg13382661	ENSG00000152443	ZNF776	-11239	-4.4145780857608585	1.045245069608777e-5
ENSG00000138468	SENP7	cg13382661	ENSG00000121417	ZNF211	-126619	-4.328687116752003	1.5455773879724605e-5
ENSG00000138468	SENP7	cg13393830	ENSG00000161551	ZNF577	0	-33.24212402464503	1.2001734512276524e-208
ENSG00000138468	SENP7	cg13393830	ENSG00000198093	ZNF649	870	-18.776228882520694	9.863745032513395e-75
ENSG00000138468	SENP7	cg13393830	ENSG00000197608	ZNF841	176112	-7.546831965150606	5.766562166346719e-14
ENSG00000138468	SENP7	cg13393830	ENSG00000256087	ZNF432	143025	-5.468533568987006	4.8832725296309886e-8
ENSG00000138468	SENP7	cg13540795	ENSG00000198093	ZNF649	-143324	-5.485890429300869	4.43118334079047e-8
ENSG00000138468	SENP7	cg13540795	ENSG00000161551	ZNF577	-157414	-5.40681344003754	6.882405046074228e-8
ENSG00000138468	SENP7	cg13551269	ENSG00000213988	ZNF90	211068	-12.006060431847159	1.6105305849544498e-32
ENSG00000138468	SENP7	cg13551269	ENSG00000184635	ZNF93	33987	-10.007905042562832	3.0583879778215803e-23
ENSG00000138468	SENP7	cg13551269	ENSG00000256771	ZNF253	0	-9.69426317966219	6.3287675820717695e-22
ENSG00000138468	SENP7	cg13551269	ENSG00000081665	ZNF506	-45172	-8.12807013197563	6.149871954994435e-16
ENSG00000138468	SENP7	cg13636880	ENSG00000204514	ZNF814	79170	-13.73624368026177	9.006681152092586e-42
ENSG00000138468	SENP7	cg13636880	ENSG00000196724	ZNF418	152323	-8.907382051152172	8.544182085079749e-19
ENSG00000138468	SENP7	cg13636880	ENSG00000204519	ZNF551	-52257	-8.641717414487864	8.570024330536854e-18
ENSG00000138468	SENP7	cg13636880	ENSG00000179909	ZNF154	-60347	-8.523387959578837	2.3436853792694423e-17
ENSG00000138468	SENP7	cg13636880	ENSG00000083814	ZNF671	-41934	-8.237939464055481	2.51648179618372e-16
ENSG00000138468	SENP7	cg13636880	ENSG00000269343	ZNF587B	50170	-7.975259696399087	2.0918729056126066e-15
ENSG00000138468	SENP7	cg13636880	ENSG00000152454	ZNF256	171272	-7.8792141886320355	4.465684516519856e-15
ENSG00000138468	SENP7	cg13636880	ENSG00000213762	ZNF134	-146202	-6.92448873183525	5.257448609231579e-12
ENSG00000138468	SENP7	cg13636880	ENSG00000183647	ZNF530	-156836	-5.15325221870403	2.7139162786062727e-7
ENSG00000138468	SENP7	cg13636880	ENSG00000121417	ZNF211	-126779	-5.116076302973118	3.301731474913181e-7
ENSG00000138468	SENP7	cg13636880	ENSG00000152443	ZNF776	-11399	-4.864740877873107	1.2009307390391319e-6
ENSG00000138468	SENP7	cg13636880	ENSG00000166704	ZNF606	207492	-4.710507619442912	2.575260872777337e-6
ENSG00000138468	SENP7	cg13636880	ENSG00000171649	ZIK1	-175781	-4.630956732273499	3.7834866335462265e-6
ENSG00000138468	SENP7	cg13636880	ENSG00000121406	ZNF549	-212016	-4.606242864962209	4.258611908791451e-6
ENSG00000138468	SENP7	cg13668618	ENSG00000196724	ZNF418	0	-14.520665036846966	2.508633134788498e-46
ENSG00000138468	SENP7	cg13668618	ENSG00000179909	ZNF154	-226165	-8.884673519121899	1.0431842921329426e-18
ENSG00000138468	SENP7	cg13668618	ENSG00000083814	ZNF671	-207752	-7.5403895327545305	6.053550485720995e-14
ENSG00000138468	SENP7	cg13668618	ENSG00000121413	ZSCAN18	148458	-7.387858912304977	1.8901630017282556e-13
ENSG00000138468	SENP7	cg13668618	ENSG00000176293	ZNF135	123860	-5.739360112228168	1.0382705387498055e-8
ENSG00000138468	SENP7	cg13668618	ENSG00000204519	ZNF551	-218075	-4.750336398688525	2.1193364023308133e-6
ENSG00000138468	SENP7	cg13668618	ENSG00000181894	ZNF329	190872	-4.643426447365142	3.5634845958864936e-6
ENSG00000138468	SENP7	cg13668618	ENSG00000204514	ZNF814	-46302	-4.404300523150179	1.0957303008342344e-5
ENSG00000138468	SENP7	cg13687570	ENSG00000181666	HKR1	0	-33.6761548848096	2.4673626640457556e-213
ENSG00000138468	SENP7	cg13933427	ENSG00000176222	ZNF404	-280	-8.804096501407296	2.1101237434772443e-18
ENSG00000138468	SENP7	cg13933427	ENSG00000104783	KCNN4	-120408	-4.995738590690918	6.172614688220657e-7
ENSG00000138468	SENP7	cg13933427	ENSG00000204920	ZNF155	66194	-4.648324188459619	3.480475838981465e-6
ENSG00000138468	SENP7	cg14025336	ENSG00000167555	ZNF528	199	-4.431684917608535	9.661053359061169e-6
ENSG00000138468	SENP7	cg14166009	ENSG00000181666	HKR1	0	-32.336975092582556	5.715002655123444e-199
ENSG00000138468	SENP7	cg14239592	ENSG00000171606	ZNF274	0	7.767029947901224	1.0711974487102699e-14
ENSG00000138468	SENP7	cg14239592	ENSG00000176293	ZNF135	-117573	7.00877374486574	2.914491885469412e-12
ENSG00000138468	SENP7	cg14239592	ENSG00000121413	ZSCAN18	-85456	6.821079550347725	1.0744088776657873e-11
ENSG00000138468	SENP7	cg14239592	ENSG00000198131	ZNF544	24707	5.778838722079172	8.237270932999494e-9
ENSG00000138468	SENP7	cg14239592	ENSG00000166704	ZNF606	-200533	4.4393932234497875	9.32347409012957e-6
ENSG00000138468	SENP7	cg14256102	ENSG00000161551	ZNF577	-117649	-5.18137805576546	2.3377725874809058e-7
ENSG00000138468	SENP7	cg14283758	ENSG00000250312	ZNF718	-141590	-8.992848553717364	4.013827091856313e-19
ENSG00000138468	SENP7	cg14386312	ENSG00000198131	ZNF544	0	-14.024524348782688	2.024076838490442e-43
ENSG00000138468	SENP7	cg14386312	ENSG00000121413	ZSCAN18	-111066	-9.490629231167603	4.31426901231509e-21
ENSG00000138468	SENP7	cg14386312	ENSG00000181894	ZNF329	-74383	-7.757333526793674	1.1547124328340845e-14
ENSG00000138468	SENP7	cg14386312	ENSG00000171606	ZNF274	-15932	-6.982834204281548	3.497217839199148e-12
ENSG00000138468	SENP7	cg14386312	ENSG00000176293	ZNF135	-143183	-5.435820291472437	5.859963611136923e-8
ENSG00000138468	SENP7	cg14582763	ENSG00000221923	ZNF880	-67634	-5.190153271740377	2.2311058951777627e-7
ENSG00000138468	SENP7	cg14582763	ENSG00000167555	ZNF528	-35017	-4.307248702884732	1.702239611793339e-5
ENSG00000138468	SENP7	cg14603375	ENSG00000152433	ZNF547	43294	-9.54796848428218	2.522548872450651e-21
ENSG00000138468	SENP7	cg14603375	ENSG00000131845	ZNF304	31124	-8.347219034811843	1.0232769555974347e-16
ENSG00000138468	SENP7	cg14603375	ENSG00000105136	ZNF419	167528	-5.593363531302152	2.4128064428680645e-8
ENSG00000138468	SENP7	cg14603375	ENSG00000197128	ZNF772	146480	-5.505127411518012	3.9775342492050684e-8
ENSG00000138468	SENP7	cg14603375	ENSG00000178229	ZNF543	326	-4.879821831701738	1.1132683595796785e-6
ENSG00000138468	SENP7	cg14626309	ENSG00000250312	ZNF718	-141271	-12.57053892264974	2.0434986051089806e-35
ENSG00000138468	SENP7	cg14713139	ENSG00000197928	ZNF677	-53674	-7.118578462554882	1.3379481579911596e-12
ENSG00000138468	SENP7	cg14886059	ENSG00000121413	ZSCAN18	50202	-8.490560111969181	3.0911435868912834e-17
ENSG00000138468	SENP7	cg14886059	ENSG00000196724	ZNF418	-98239	-8.35334406743518	9.726290799221465e-17
ENSG00000138468	SENP7	cg14886059	ENSG00000176293	ZNF135	25604	-8.114065601444386	6.886252997439888e-16
ENSG00000138468	SENP7	cg14886059	ENSG00000171606	ZNF274	149393	-5.176828453244773	2.394998727104998e-7
ENSG00000138468	SENP7	cg14886059	ENSG00000204514	ZNF814	-144558	-4.337825545171452	1.4830657986648335e-5
ENSG00000138468	SENP7	cg15060012	ENSG00000196724	ZNF418	-21	-26.41457947151063	2.254638700859991e-139
ENSG00000138468	SENP7	cg15060012	ENSG00000179909	ZNF154	-226203	-15.665833865674715	2.279683109748563e-53
ENSG00000138468	SENP7	cg15060012	ENSG00000121413	ZSCAN18	148420	-15.15005557029384	3.8563169050202285e-50
ENSG00000138468	SENP7	cg15060012	ENSG00000083814	ZNF671	-207790	-14.002974732562029	2.6945198774326367e-43
ENSG00000138468	SENP7	cg15060012	ENSG00000176293	ZNF135	123822	-11.87847057828152	6.999857212655059e-32
ENSG00000138468	SENP7	cg15060012	ENSG00000152454	ZNF256	5416	-10.020764478686418	2.69599837093244e-23
ENSG00000138468	SENP7	cg15060012	ENSG00000204519	ZNF551	-218113	-9.691690584432342	6.4856296239240875e-22
ENSG00000138468	SENP7	cg15060012	ENSG00000171606	ZNF274	247611	-8.286280181213955	1.6924326357956176e-16
ENSG00000138468	SENP7	cg15060012	ENSG00000181894	ZNF329	190834	-8.02231803469178	1.4381647374038704e-15
ENSG00000138468	SENP7	cg15060012	ENSG00000204514	ZNF814	-46340	-7.679443677630602	2.103781985850865e-14
ENSG00000138468	SENP7	cg15060012	ENSG00000152443	ZNF776	-177255	-5.986065413585722	2.3857999590406202e-9
ENSG00000138468	SENP7	cg15060012	ENSG00000173480	ZNF417	-18804	-4.714737544883504	2.5226968016203256e-6
ENSG00000138468	SENP7	cg15415136	ENSG00000120784	ZFP30	62230	-7.019969163546992	2.6934761964372933e-12
ENSG00000138468	SENP7	cg15439725	ENSG00000250312	ZNF718	-141531	-7.123308353988663	1.2934936396769191e-12
ENSG00000138468	SENP7	cg15746696	ENSG00000196724	ZNF418	32756	-28.130211404573732	6.579459097664571e-156
ENSG00000138468	SENP7	cg15746696	ENSG00000179909	ZNF154	-179914	-24.59144013091424	1.5222884621155256e-122
ENSG00000138468	SENP7	cg15746696	ENSG00000083814	ZNF671	-161501	-22.152044085253692	2.461988186361422e-101
ENSG00000138468	SENP7	cg15746696	ENSG00000204514	ZNF814	-51	-19.127292979166484	2.4360962506949686e-77
ENSG00000138468	SENP7	cg15746696	ENSG00000121413	ZSCAN18	194709	-18.84295773319154	3.1725190441348914e-75
ENSG00000138468	SENP7	cg15746696	ENSG00000204519	ZNF551	-171824	-16.03222631916421	1.020479301575751e-55
ENSG00000138468	SENP7	cg15746696	ENSG00000176293	ZNF135	170111	-15.125301508956415	5.480010819117381e-50
ENSG00000138468	SENP7	cg15746696	ENSG00000152454	ZNF256	51705	-14.293878759568361	5.483529225497166e-45
ENSG00000138468	SENP7	cg15746696	ENSG00000121417	ZNF211	-246346	-13.465080377641833	3.0027946228835778e-40
ENSG00000138468	SENP7	cg15746696	ENSG00000181894	ZNF329	237123	-13.202995560208269	8.394455905880037e-39
ENSG00000138468	SENP7	cg15746696	ENSG00000152443	ZNF776	-130966	-12.25122588002819	9.195875504632653e-34
ENSG00000138468	SENP7	cg15746696	ENSG00000173480	ZNF417	11168	-9.338082820427273	1.7727174864924706e-20
ENSG00000138468	SENP7	cg15746696	ENSG00000269343	ZNF587B	-30475	-6.943409118513792	4.607994848594155e-12
ENSG00000138468	SENP7	cg15746696	ENSG00000176593	CTD-2368P22.1	112933	-5.558611479910947	2.9403945929595494e-8
ENSG00000138468	SENP7	cg15746696	ENSG00000166704	ZNF606	87925	-5.538171604220545	3.30132015625603e-8
ENSG00000138468	SENP7	cg15759937	ENSG00000196724	ZNF418	32925	-13.866764872179493	1.62925322569732e-42
ENSG00000138468	SENP7	cg15759937	ENSG00000179909	ZNF154	-179745	-12.980859119669656	1.3496889464736367e-37
ENSG00000138468	SENP7	cg15759937	ENSG00000083814	ZNF671	-161332	-12.085390439818093	6.413807911830216e-33
ENSG00000138468	SENP7	cg15759937	ENSG00000204514	ZNF814	0	-9.598876029497482	1.5625280765481423e-21
ENSG00000138468	SENP7	cg15759937	ENSG00000121413	ZSCAN18	194878	-9.143705631403977	1.0406829295936159e-19
ENSG00000138468	SENP7	cg15759937	ENSG00000152454	ZNF256	51874	-8.689050437292362	5.710087577786035e-18
ENSG00000138468	SENP7	cg15759937	ENSG00000204519	ZNF551	-171655	-8.476065004912437	3.491924040719645e-17
ENSG00000138468	SENP7	cg15759937	ENSG00000121417	ZNF211	-246177	-8.001390223080527	1.6993651480061427e-15
ENSG00000138468	SENP7	cg15759937	ENSG00000152443	ZNF776	-130797	-7.749967722124519	1.2224076095416892e-14
ENSG00000138468	SENP7	cg15759937	ENSG00000176293	ZNF135	170280	-6.751077186466717	1.7330714189469905e-11
ENSG00000138468	SENP7	cg15759937	ENSG00000181894	ZNF329	237292	-5.904819847854522	3.896888777779228e-9
ENSG00000138468	SENP7	cg15759937	ENSG00000173480	ZNF417	11337	-4.820265423678182	1.499872584904343e-6
ENSG00000138468	SENP7	cg15759937	ENSG00000166704	ZNF606	88094	-4.349653639400785	1.405730460329246e-5
ENSG00000138468	SENP7	cg15800907	ENSG00000187474	FPR3	0	-6.78390717175129	1.3857412280328057e-11
ENSG00000138468	SENP7	cg15800907	ENSG00000161551	ZNF577	30943	-6.14675056192756	8.876542958385716e-10
ENSG00000138468	SENP7	cg16731240	ENSG00000161551	ZNF577	0	-26.92033208606781	3.5195063599055293e-144
ENSG00000138468	SENP7	cg16731240	ENSG00000198093	ZNF649	1225	-16.56785510939726	3.107548517767386e-59
ENSG00000138468	SENP7	cg16731240	ENSG00000197608	ZNF841	176467	-5.150300004461872	2.7566315486497694e-7
ENSG00000138468	SENP7	cg17271561	ENSG00000221923	ZNF880	33834	-5.888188671901128	4.30530057658608e-9
ENSG00000138468	SENP7	cg17271561	ENSG00000167555	ZNF528	61766	-4.587006826534507	4.667489853511838e-6
ENSG00000138468	SENP7	cg17332326	ENSG00000188227	ZNF793	368	-9.349589027601052	1.5946600172665238e-20
ENSG00000138468	SENP7	cg17431052	ENSG00000181666	HKR1	61256	-8.942000197294579	6.296792832671695e-19
ENSG00000138468	SENP7	cg17431052	ENSG00000245680	ZNF585B	-33425	-5.984874718496025	2.4031252142042266e-9
ENSG00000138468	SENP7	cg17650272	ENSG00000221923	ZNF880	149	-6.475254039640003	1.0902617949673538e-10
ENSG00000138468	SENP7	cg17650272	ENSG00000167555	ZNF528	28081	-5.685201355994493	1.42291705434226e-8
ENSG00000138468	SENP7	cg17798563	ENSG00000179909	ZNF154	114216	9.158174930876475	9.133025793749367e-20
ENSG00000138468	SENP7	cg17798563	ENSG00000083814	ZNF671	136600	8.396155291995473	6.814527842010122e-17
ENSG00000138468	SENP7	cg17798563	ENSG00000131845	ZNF304	-223250	7.206362987280749	7.121916580263523e-13
ENSG00000138468	SENP7	cg17798563	ENSG00000152433	ZNF547	-203583	7.017729210125542	2.7363385271522367e-12
ENSG00000138468	SENP7	cg17798563	ENSG00000197128	ZNF772	-105578	6.720958279655148	2.125900711152232e-11
ENSG00000138468	SENP7	cg17798563	ENSG00000121417	ZNF211	47242	6.400753365716958	1.769854867795945e-10
ENSG00000138468	SENP7	cg17798563	ENSG00000213762	ZNF134	31082	6.359018154336573	2.3164141020496172e-10
ENSG00000138468	SENP7	cg17798563	ENSG00000204519	ZNF551	98818	6.30388993714659	3.2969331867756457e-10
ENSG00000138468	SENP7	cg17798563	ENSG00000171649	ZIK1	0	5.806866938707243	6.982732851051156e-9
ENSG00000138468	SENP7	cg17798563	ENSG00000152443	ZNF776	163645	5.159631343699478	2.623790427262659e-7
ENSG00000138468	SENP7	cg17798563	ENSG00000105136	ZNF419	-88468	4.657103202157984	3.336306393243451e-6
ENSG00000138468	SENP7	cg17823234	ENSG00000198182	ZNF607	7241	-5.0842501866480125	3.901071848933158e-7
ENSG00000138468	SENP7	cg18673377	ENSG00000196724	ZNF418	-136	-27.186209954547106	9.921029589552879e-147
ENSG00000138468	SENP7	cg18673377	ENSG00000179909	ZNF154	-226318	-16.585243031295256	2.380365647418616e-59
ENSG00000138468	SENP7	cg18673377	ENSG00000083814	ZNF671	-207905	-15.096597618173	8.231373882078413e-50
ENSG00000138468	SENP7	cg18673377	ENSG00000121413	ZSCAN18	148305	-14.609734713478527	7.384081904568989e-47
ENSG00000138468	SENP7	cg18673377	ENSG00000176293	ZNF135	123707	-11.198192023620043	1.3902188178687838e-28
ENSG00000138468	SENP7	cg18673377	ENSG00000152454	ZNF256	5301	-10.260704736119903	2.4938331845050592e-24
ENSG00000138468	SENP7	cg18673377	ENSG00000171606	ZNF274	247496	-9.606760029595364	1.4505138101627539e-21
ENSG00000138468	SENP7	cg18673377	ENSG00000204519	ZNF551	-218228	-9.605410398998057	1.4691087160053165e-21
ENSG00000138468	SENP7	cg18673377	ENSG00000181894	ZNF329	190719	-9.60468888690987	1.479146132245446e-21
ENSG00000138468	SENP7	cg18673377	ENSG00000204514	ZNF814	-46455	-9.412448062382818	8.9248094616464e-21
ENSG00000138468	SENP7	cg18673377	ENSG00000152443	ZNF776	-177370	-5.506551031535272	3.945814513388744e-8
ENSG00000138468	SENP7	cg18673377	ENSG00000173480	ZNF417	-18919	-5.109676068252406	3.414626822907111e-7
ENSG00000138468	SENP7	cg18860954	ENSG00000196724	ZNF418	32676	-23.748586438017124	4.859105266745677e-115
ENSG00000138468	SENP7	cg18860954	ENSG00000179909	ZNF154	-179994	-19.815361052728466	1.4663727641271934e-82
ENSG00000138468	SENP7	cg18860954	ENSG00000083814	ZNF671	-161581	-18.237813015387445	8.273932481107698e-71
ENSG00000138468	SENP7	cg18860954	ENSG00000121413	ZSCAN18	194629	-15.737056410131169	8.032497678154443e-54
ENSG00000138468	SENP7	cg18860954	ENSG00000204514	ZNF814	-131	-14.634144477100294	5.275267858326152e-47
ENSG00000138468	SENP7	cg18860954	ENSG00000204519	ZNF551	-171904	-12.626822219897548	1.035203603325417e-35
ENSG00000138468	SENP7	cg18860954	ENSG00000152454	ZNF256	51625	-12.626816695230518	1.0352728475589716e-35
ENSG00000138468	SENP7	cg18860954	ENSG00000176293	ZNF135	170031	-12.159827359363351	2.6901152342611396e-33
ENSG00000138468	SENP7	cg18860954	ENSG00000121417	ZNF211	-246426	-11.734056216709767	3.6301611621159053e-31
ENSG00000138468	SENP7	cg18860954	ENSG00000181894	ZNF329	237043	-9.803059100376935	2.234923209438012e-22
ENSG00000138468	SENP7	cg18860954	ENSG00000152443	ZNF776	-131046	-9.441488679599775	6.817361644358845e-21
ENSG00000138468	SENP7	cg18860954	ENSG00000173480	ZNF417	11088	-5.708053642057399	1.2461614332195182e-8
ENSG00000138468	SENP7	cg19311218	ENSG00000267508	ZNF285	-46642	-4.81522857596441	1.5379280484172772e-6
ENSG00000138468	SENP7	cg19375479	ENSG00000267508	ZNF285	-46829	-6.340857874426059	2.6028633238026316e-10
ENSG00000138468	SENP7	cg19416570	ENSG00000171606	ZNF274	0	7.398572326541298	1.7461251081787164e-13
ENSG00000138468	SENP7	cg19416570	ENSG00000176293	ZNF135	-117999	7.174763955902909	8.943969025839116e-13
ENSG00000138468	SENP7	cg19416570	ENSG00000121413	ZSCAN18	-85882	7.172787389081367	9.072045865750291e-13
ENSG00000138468	SENP7	cg19416570	ENSG00000198131	ZNF544	24281	6.091841762947446	1.247850103953968e-9
ENSG00000138468	SENP7	cg19866478	ENSG00000167555	ZNF528	100049	-4.769823741948736	1.9255719753724894e-6
ENSG00000138468	SENP7	cg19866478	ENSG00000221923	ZNF880	72117	-4.496964948991981	7.135768216923938e-6
ENSG00000138468	SENP7	cg19904905	ENSG00000087086	FTL	0	-4.308416506954993	1.693329604556339e-5
ENSG00000138468	SENP7	cg19915738	ENSG00000267508	ZNF285	-46955	-7.018654505629543	2.7185521367273535e-12
ENSG00000138468	SENP7	cg20320494	ENSG00000250312	ZNF718	152	-9.831183997412591	1.7046853677033907e-22
ENSG00000138468	SENP7	cg21020710	ENSG00000198131	ZNF544	155	-10.083461171515664	1.4546037980267476e-23
ENSG00000138468	SENP7	cg21020710	ENSG00000121413	ZSCAN18	-110008	-6.57510914309685	5.6488689524494356e-11
ENSG00000138468	SENP7	cg21020710	ENSG00000181894	ZNF329	-73325	-5.723942761176443	1.1360446297926816e-8
ENSG00000138468	SENP7	cg21020710	ENSG00000176293	ZNF135	-142125	-5.47710073829275	4.654802233809431e-8
ENSG00000138468	SENP7	cg21020710	ENSG00000171606	ZNF274	-14874	-4.4010427561742675	1.1122134251170256e-5
ENSG00000138468	SENP7	cg21444693	ENSG00000196724	ZNF418	-25	-27.645322170300833	3.603524422093445e-151
ENSG00000138468	SENP7	cg21444693	ENSG00000179909	ZNF154	-226207	-16.446846823484528	1.973848392011475e-58
ENSG00000138468	SENP7	cg21444693	ENSG00000083814	ZNF671	-207794	-14.867894578884416	2.0557037165599223e-48
ENSG00000138468	SENP7	cg21444693	ENSG00000121413	ZSCAN18	148416	-14.841992991905405	2.9517005488959475e-48
ENSG00000138468	SENP7	cg21444693	ENSG00000176293	ZNF135	123818	-12.218267757626165	1.3553689502305463e-33
ENSG00000138468	SENP7	cg21444693	ENSG00000152454	ZNF256	5412	-11.218285568693867	1.1173793915139682e-28
ENSG00000138468	SENP7	cg21444693	ENSG00000204519	ZNF551	-218117	-10.85927122042618	5.2494025452712304e-27
ENSG00000138468	SENP7	cg21444693	ENSG00000204514	ZNF814	-46344	-9.316973308230086	2.1520052481671183e-20
ENSG00000138468	SENP7	cg21444693	ENSG00000181894	ZNF329	190830	-8.89478294095905	9.545383249514628e-19
ENSG00000138468	SENP7	cg21444693	ENSG00000171606	ZNF274	247607	-8.892497212991346	9.73905986530417e-19
ENSG00000138468	SENP7	cg21444693	ENSG00000152443	ZNF776	-177259	-6.430902420063063	1.4556703454251993e-10
ENSG00000138468	SENP7	cg21444693	ENSG00000173480	ZNF417	-18808	-5.16136287897147	2.5998303187692904e-7
ENSG00000138468	SENP7	cg21489303	ENSG00000197128	ZNF772	-243	-11.397689157061354	1.5638651149948167e-29
ENSG00000138468	SENP7	cg21489303	ENSG00000179909	ZNF154	219551	-9.910543560557732	7.908381513199702e-23
ENSG00000138468	SENP7	cg21489303	ENSG00000083814	ZNF671	241935	-9.40694393608482	9.391464436188126e-21
ENSG00000138468	SENP7	cg21489303	ENSG00000131845	ZNF304	-117915	-8.734484741236171	3.859537234601091e-18
ENSG00000138468	SENP7	cg21489303	ENSG00000204519	ZNF551	204153	-7.664698630902596	2.3552881006709417e-14
ENSG00000138468	SENP7	cg21489303	ENSG00000152439	ZNF773	22099	-6.664573985993894	3.1092053711367206e-11
ENSG00000138468	SENP7	cg21489303	ENSG00000171649	ZIK1	100640	-6.514905548357464	8.406619157915983e-11
ENSG00000138468	SENP7	cg21489303	ENSG00000121406	ZNF549	49509	-6.268487675092084	4.12949831962471e-10
ENSG00000138468	SENP7	cg21489303	ENSG00000121417	ZNF211	152577	-6.260694944310702	4.338637154040116e-10
ENSG00000138468	SENP7	cg21489303	ENSG00000178229	ZNF543	-147037	-5.960171548821668	2.7915137155513776e-9
ENSG00000138468	SENP7	cg21489303	ENSG00000213762	ZNF134	136417	-5.611120185290796	2.1799630745950746e-8
ENSG00000138468	SENP7	cg21489303	ENSG00000152433	ZNF547	-98248	-4.838849302493696	1.367148348440883e-6
ENSG00000138468	SENP7	cg21489303	ENSG00000183647	ZNF530	122069	-4.699045792819878	2.7230331446510176e-6
ENSG00000138468	SENP7	cg21489303	ENSG00000105136	ZNF419	9895	-4.612554053152452	4.132110940835132e-6
ENSG00000138468	SENP7	cg21493505	ENSG00000166770	ZNF667-AS1	109199	-8.179096203219324	4.0666727240721113e-16
ENSG00000138468	SENP7	cg21493505	ENSG00000196867	ZFP28	170897	-7.4813466634275665	9.430607135308273e-14
ENSG00000138468	SENP7	cg21493505	ENSG00000197016	ZNF470	199460	-4.821599220436493	1.4899478902197203e-6
ENSG00000138468	SENP7	cg21553182	ENSG00000221923	ZNF880	-67772	-5.903145220138344	3.93624067133585e-9
ENSG00000138468	SENP7	cg21553182	ENSG00000167555	ZNF528	-35155	-5.424818308239366	6.229125791728458e-8
ENSG00000138468	SENP7	cg21759268	ENSG00000196724	ZNF418	-226	-16.83190958994823	5.2887463159296125e-61
ENSG00000138468	SENP7	cg21759268	ENSG00000179909	ZNF154	-226408	-8.803255551103394	2.1256282817335374e-18
ENSG00000138468	SENP7	cg21759268	ENSG00000083814	ZNF671	-207995	-7.931507975748112	2.958196779933249e-15
ENSG00000138468	SENP7	cg21759268	ENSG00000121413	ZSCAN18	148215	-7.780973690896959	9.614284567410696e-15
ENSG00000138468	SENP7	cg21759268	ENSG00000176293	ZNF135	123617	-6.0010719975565925	2.1776107799714793e-9
ENSG00000138468	SENP7	cg21759268	ENSG00000152454	ZNF256	5211	-5.7803151870448675	8.166036804547181e-9
ENSG00000138468	SENP7	cg21759268	ENSG00000204519	ZNF551	-218318	-5.063597691720405	4.3448089212334225e-7
ENSG00000138468	SENP7	cg21759268	ENSG00000181894	ZNF329	190629	-4.518802766357374	6.442188601854208e-6
ENSG00000138468	SENP7	cg21790626	ENSG00000179909	ZNF154	0	-21.707956251443644	1.2021570607416927e-97
ENSG00000138468	SENP7	cg21790626	ENSG00000083814	ZNF671	10623	-16.31618327032459	1.4345975578769865e-57
ENSG00000138468	SENP7	cg21790626	ENSG00000196724	ZNF418	212756	-16.06724210818487	6.052021396856344e-56
ENSG00000138468	SENP7	cg21790626	ENSG00000204519	ZNF551	0	-11.833133513451001	1.1758545964218645e-31
ENSG00000138468	SENP7	cg21790626	ENSG00000121417	ZNF211	-66346	-11.059949743225037	6.189702984477128e-28
ENSG00000138468	SENP7	cg21790626	ENSG00000204514	ZNF814	139603	-10.402844841099439	5.940458081878134e-25
ENSG00000138468	SENP7	cg21790626	ENSG00000213762	ZNF134	-85769	-8.89633987540946	9.415643623671265e-19
ENSG00000138468	SENP7	cg21790626	ENSG00000171649	ZIK1	-115348	-8.773147395066564	2.76141627502749e-18
ENSG00000138468	SENP7	cg21790626	ENSG00000152454	ZNF256	231705	-8.707131504650151	4.887034680932973e-18
ENSG00000138468	SENP7	cg21790626	ENSG00000197128	ZNF772	-231555	-6.9661645227312805	3.9305117694510925e-12
ENSG00000138468	SENP7	cg21790626	ENSG00000183647	ZNF530	-96403	-6.405927104304031	1.711587548950481e-10
ENSG00000138468	SENP7	cg21790626	ENSG00000152443	ZNF776	37668	-6.358149309876734	2.329387899625975e-10
ENSG00000138468	SENP7	cg21790626	ENSG00000105136	ZNF419	-214445	-6.294623285609221	3.497484134769681e-10
ENSG00000138468	SENP7	cg21790626	ENSG00000152439	ZNF773	-190721	-5.962777947156961	2.747810701092078e-9
ENSG00000138468	SENP7	cg21790626	ENSG00000121406	ZNF549	-151583	-5.536982209412936	3.323596377241086e-8
ENSG00000138468	SENP7	cg21790626	ENSG00000083817	ZNF416	-130198	-5.474136709182433	4.7326489515909024e-8
ENSG00000138468	SENP7	cg21790626	ENSG00000173480	ZNF417	191168	-5.00425847683281	5.907806086369384e-7
ENSG00000138468	SENP7	cg21808240	ENSG00000232677	LINC00665	0	-27.39948794044735	8.7054345991923e-149
ENSG00000138468	SENP7	cg21808240	ENSG00000181007	ZFP82	51456	-14.334129473731542	3.181554567837218e-45
ENSG00000138468	SENP7	cg21907914	ENSG00000197928	ZNF677	0	-7.634143559766958	2.9743560067095445e-14
ENSG00000138468	SENP7	cg22001557	ENSG00000083814	ZNF671	-431	-18.210187487679345	1.3078342534477628e-70
ENSG00000138468	SENP7	cg22001557	ENSG00000179909	ZNF154	-18844	-17.608977216342197	2.416593530345894e-66
ENSG00000138468	SENP7	cg22001557	ENSG00000204514	ZNF814	120673	-16.13612752178864	2.15923971639988e-56
ENSG00000138468	SENP7	cg22001557	ENSG00000196724	ZNF418	193826	-15.94415232731093	3.781612459367806e-55
ENSG00000138468	SENP7	cg22001557	ENSG00000152454	ZNF256	212775	-10.94742980254023	2.0613607064159727e-27
ENSG00000138468	SENP7	cg22001557	ENSG00000121417	ZNF211	-85276	-10.170659935340188	6.1303933579210235e-24
ENSG00000138468	SENP7	cg22001557	ENSG00000204519	ZNF551	-10754	-9.957931826236745	4.9857606367076267e-23
ENSG00000138468	SENP7	cg22001557	ENSG00000213762	ZNF134	-104699	-9.639955862481411	1.0598095835249309e-21
ENSG00000138468	SENP7	cg22001557	ENSG00000171649	ZIK1	-134278	-9.584226561058392	1.793871437235311e-21
ENSG00000138468	SENP7	cg22001557	ENSG00000152443	ZNF776	18738	-9.055395034644981	2.2993053883416787e-19
ENSG00000138468	SENP7	cg22001557	ENSG00000183647	ZNF530	-115333	-6.845232118861397	9.100448519261025e-12
ENSG00000138468	SENP7	cg22001557	ENSG00000083828	ZNF586	41597	6.6972589007041945	2.495159407483533e-11
ENSG00000138468	SENP7	cg22001557	ENSG00000152439	ZNF773	-209651	-6.641915403993098	3.619376241701671e-11
ENSG00000138468	SENP7	cg22001557	ENSG00000105136	ZNF419	-233375	-6.429218351250742	1.471681273183184e-10
ENSG00000138468	SENP7	cg22001557	ENSG00000166704	ZNF606	248995	-6.12056138698872	1.044596753587262e-9
ENSG00000138468	SENP7	cg22001557	ENSG00000269343	ZNF587B	91673	-6.103841329727644	1.1586231712798874e-9
ENSG00000138468	SENP7	cg22001557	ENSG00000121406	ZNF549	-170513	-5.16393349366257	2.5646489993795647e-7
ENSG00000138468	SENP7	cg22001557	ENSG00000083817	ZNF416	-149128	-4.65715437886711	3.3354830089087243e-6
ENSG00000138468	SENP7	cg22022580	ENSG00000197808	ZNF461	-108849	-5.349279890007593	9.446127173058224e-8
ENSG00000138468	SENP7	cg22331349	ENSG00000161551	ZNF577	0	-29.864469692590458	2.972682401662249e-173
ENSG00000138468	SENP7	cg22331349	ENSG00000198093	ZNF649	1125	-17.265205874499006	5.890810621022451e-64
ENSG00000138468	SENP7	cg22331349	ENSG00000197608	ZNF841	176367	-5.06344783654438	4.3482001677064e-7
ENSG00000138468	SENP7	cg22331349	ENSG00000256087	ZNF432	143280	-4.413552645871218	1.0501806334209187e-5
ENSG00000138468	SENP7	cg22457238	ENSG00000176293	ZNF135	0	-13.22964463743934	5.998792135288642e-39
ENSG00000138468	SENP7	cg22457238	ENSG00000196724	ZNF418	-124233	-11.578215577904427	2.101099881566192e-30
ENSG00000138468	SENP7	cg22457238	ENSG00000121413	ZSCAN18	24208	-11.217937654629027	1.1216176567454983e-28
ENSG00000138468	SENP7	cg22457238	ENSG00000181894	ZNF329	66622	-6.971899382448856	3.775813088711942e-12
ENSG00000138468	SENP7	cg22457238	ENSG00000152454	ZNF256	-111951	-6.375199770267732	2.087297929652319e-10
ENSG00000138468	SENP7	cg22457238	ENSG00000171606	ZNF274	123399	-6.13870063054313	9.332687429447981e-10
ENSG00000138468	SENP7	cg22457238	ENSG00000198131	ZNF544	168963	-5.744576486969581	1.0070808304771171e-8
ENSG00000138468	SENP7	cg22457238	ENSG00000166704	ZNF606	-56277	-4.920350135263769	9.071402270083717e-7
ENSG00000138468	SENP7	cg22457238	ENSG00000204514	ZNF814	-170552	-4.545986865749175	5.6686775023635994e-6
ENSG00000138468	SENP7	cg22457238	ENSG00000176593	CTD-2368P22.1	-48394	-4.369565778964298	1.2841575509306348e-5
ENSG00000138468	SENP7	cg22472290	ENSG00000161551	ZNF577	0	-36.39412262743924	2.5914356598249694e-243
ENSG00000138468	SENP7	cg22472290	ENSG00000198093	ZNF649	995	-19.220403713834703	4.883662738346317e-78
ENSG00000138468	SENP7	cg22472290	ENSG00000197608	ZNF841	176237	-6.775024748956722	1.4723328004795706e-11
ENSG00000138468	SENP7	cg22472290	ENSG00000256087	ZNF432	143150	-5.103278784404856	3.5311911479459763e-7
ENSG00000138468	SENP7	cg22510337	ENSG00000196724	ZNF418	33283	-24.332204943403582	3.233661007834367e-120
ENSG00000138468	SENP7	cg22510337	ENSG00000179909	ZNF154	-179387	-21.789369759735198	2.5577134869087823e-98
ENSG00000138468	SENP7	cg22510337	ENSG00000083814	ZNF671	-160974	-18.639699823218667	9.945893559908616e-74
ENSG00000138468	SENP7	cg22510337	ENSG00000204514	ZNF814	0	-16.198900745394628	8.414164694641145e-57
ENSG00000138468	SENP7	cg22510337	ENSG00000121413	ZSCAN18	195236	-14.58355515824668	1.0585292226700321e-46
ENSG00000138468	SENP7	cg22510337	ENSG00000204519	ZNF551	-171297	-12.480586567367714	6.02491767829117e-35
ENSG00000138468	SENP7	cg22510337	ENSG00000176293	ZNF135	170638	-12.37659904479619	2.0846360937362645e-34
ENSG00000138468	SENP7	cg22510337	ENSG00000152454	ZNF256	52232	-11.814989617846013	1.4463936460729626e-31
ENSG00000138468	SENP7	cg22510337	ENSG00000121417	ZNF211	-245819	-11.644067088989166	1.0031459906897418e-30
ENSG00000138468	SENP7	cg22510337	ENSG00000181894	ZNF329	237650	-10.959393610216535	1.814812664459782e-27
ENSG00000138468	SENP7	cg22510337	ENSG00000152443	ZNF776	-130439	-9.58877422600908	1.7186434315382814e-21
ENSG00000138468	SENP7	cg22510337	ENSG00000173480	ZNF417	11695	-7.041461658288176	2.314296867001761e-12
ENSG00000138468	SENP7	cg22510337	ENSG00000269343	ZNF587B	-29948	-5.0770035411046175	4.0515445409515034e-7
ENSG00000138468	SENP7	cg22510337	ENSG00000166704	ZNF606	88452	-4.29911970090876	1.7655114576466593e-5
ENSG00000138468	SENP7	cg22517995	ENSG00000181007	ZFP82	-187029	-4.585141453450142	4.709082821481569e-6
ENSG00000138468	SENP7	cg22517995	ENSG00000186020	ZNF529	-409	-4.359122243788308	1.346610804620158e-5
ENSG00000138468	SENP7	cg22561329	ENSG00000127903	ZNF835	-163583	-14.149277372769003	3.8337331624834265e-44
ENSG00000138468	SENP7	cg22561329	ENSG00000197016	ZNF470	-246455	-6.354206448451329	2.389161482027167e-10
ENSG00000138468	SENP7	cg22634378	ENSG00000181666	HKR1	60903	-6.146684911048621	8.880173530527449e-10
ENSG00000138468	SENP7	cg22682154	ENSG00000152433	ZNF547	191679	-9.295536226220607	2.619227337966312e-20
ENSG00000138468	SENP7	cg22682154	ENSG00000178229	ZNF543	148711	-8.85082548270038	1.4034456610108117e-18
ENSG00000138468	SENP7	cg22682154	ENSG00000131845	ZNF304	179509	-5.692612790955137	1.3630774742447083e-8
ENSG00000138468	SENP7	cg22682154	ENSG00000083844	ZNF264	19702	-4.83107793900183	1.421215049116164e-6
ENSG00000138468	SENP7	cg22685966	ENSG00000198182	ZNF607	3844	-10.94759327571868	2.057777639334523e-27
ENSG00000138468	SENP7	cg22685966	ENSG00000120784	ZFP30	-179	-7.467118239722018	1.0488783533548656e-13
ENSG00000138468	SENP7	cg22720041	ENSG00000267508	ZNF285	-46950	-8.457328854269127	4.0867374736421514e-17
ENSG00000138468	SENP7	cg22720790	ENSG00000171606	ZNF274	0	7.165934998029885	9.53016358574061e-13
ENSG00000138468	SENP7	cg22720790	ENSG00000121413	ZSCAN18	-86237	7.058282940909817	2.054543877106857e-12
ENSG00000138468	SENP7	cg22720790	ENSG00000176293	ZNF135	-118354	6.842253656512113	9.288974248095748e-12
ENSG00000138468	SENP7	cg22720790	ENSG00000181894	ZNF329	-49554	5.082763728451905	3.93149070872047e-7
ENSG00000138468	SENP7	cg22720790	ENSG00000198131	ZNF544	23926	5.040943326035848	4.88755168306409e-7
ENSG00000138468	SENP7	cg23010048	ENSG00000161551	ZNF577	0	-27.370858113206655	1.6461347331537596e-148
ENSG00000138468	SENP7	cg23010048	ENSG00000198093	ZNF649	1218	-16.80704526373054	7.779077134831134e-61
ENSG00000138468	SENP7	cg23010048	ENSG00000197608	ZNF841	176460	-5.767340836429302	8.813068668110993e-9
ENSG00000138468	SENP7	cg23010048	ENSG00000256087	ZNF432	143373	-4.748877084415404	2.1345772052322675e-6
ENSG00000138468	SENP7	cg23029635	ENSG00000131845	ZNF304	-32987	7.809402700868298	7.708060519041472e-15
ENSG00000138468	SENP7	cg23029635	ENSG00000213762	ZNF134	221345	5.638079728733614	1.8676109808823674e-8
ENSG00000138468	SENP7	cg23029635	ENSG00000152433	ZNF547	-13320	5.534377914349146	3.372882880130051e-8
ENSG00000138468	SENP7	cg23029635	ENSG00000171649	ZIK1	185568	5.446313200198831	5.527696212000335e-8
ENSG00000138468	SENP7	cg23029635	ENSG00000121417	ZNF211	237505	5.28308709838275	1.3545183379581344e-7
ENSG00000138468	SENP7	cg23029635	ENSG00000105136	ZNF419	94823	5.207675584227135	2.0320132483637834e-7
ENSG00000138468	SENP7	cg23054584	ENSG00000232677	LINC00665	0	-22.310213777498888	1.159520118865107e-102
ENSG00000138468	SENP7	cg23054584	ENSG00000181007	ZFP82	51709	-8.403040019383237	6.43456579697545e-17
ENSG00000138468	SENP7	cg23397578	ENSG00000181666	HKR1	60812	-7.185902164026954	8.254750820415356e-13
ENSG00000138468	SENP7	cg23405218	ENSG00000198182	ZNF607	3806	-5.892063924590544	4.206564934877034e-9
ENSG00000138468	SENP7	cg23448505	ENSG00000181666	HKR1	0	-35.282711586381836	6.270840257127692e-231
ENSG00000138468	SENP7	cg23448505	ENSG00000245680	ZNF585B	-116952	-5.851700760712444	5.352694696916973e-9
ENSG00000138468	SENP7	cg23891996	ENSG00000174652	ZNF266	5412	9.888855215400303	9.760936439931753e-23
ENSG00000138468	SENP7	cg24027100	ENSG00000232677	LINC00665	0	-45.23877718229095	0
ENSG00000138468	SENP7	cg24027100	ENSG00000181007	ZFP82	51471	-19.321464382737748	8.475772756223024e-79
ENSG00000138468	SENP7	cg24027100	ENSG00000186020	ZNF529	203125	-5.982707085074428	2.4349807332408903e-9
ENSG00000138468	SENP7	cg24027100	ENSG00000254004	ZNF260	179046	-5.132534732449015	3.0277244296593617e-7
ENSG00000138468	SENP7	cg24027100	ENSG00000142065	ZFP14	4611	-5.1076779347736965	3.4506296460793704e-7
ENSG00000138468	SENP7	cg24124798	ENSG00000196724	ZNF418	32975	-14.313333518379418	4.215615331523136e-45
ENSG00000138468	SENP7	cg24124798	ENSG00000179909	ZNF154	-179695	-13.4595037149169	3.2252642908141487e-40
ENSG00000138468	SENP7	cg24124798	ENSG00000083814	ZNF671	-161282	-13.007688706033129	9.671851183079748e-38
ENSG00000138468	SENP7	cg24124798	ENSG00000121413	ZSCAN18	194928	-10.475062234648135	2.8461300300382237e-25
ENSG00000138468	SENP7	cg24124798	ENSG00000152454	ZNF256	51924	-9.086041575910071	1.747721994630003e-19
ENSG00000138468	SENP7	cg24124798	ENSG00000204514	ZNF814	0	-8.717103314353794	4.484450542257992e-18
ENSG00000138468	SENP7	cg24124798	ENSG00000121417	ZNF211	-246127	-8.105140804663598	7.400191912360913e-16
ENSG00000138468	SENP7	cg24124798	ENSG00000181894	ZNF329	237342	-8.103810547130509	7.479965587917407e-16
ENSG00000138468	SENP7	cg24124798	ENSG00000176293	ZNF135	170330	-8.102438976855167	7.563104275683814e-16
ENSG00000138468	SENP7	cg24124798	ENSG00000204519	ZNF551	-171605	-7.803689284449589	8.05858731554409e-15
ENSG00000138468	SENP7	cg24124798	ENSG00000152443	ZNF776	-130747	-6.0350466893390795	1.7695546809447136e-9
ENSG00000138468	SENP7	cg24124798	ENSG00000173480	ZNF417	11387	-4.46829327680772	8.155458975196168e-6
ENSG00000138468	SENP7	cg24192482	ENSG00000179909	ZNF154	96964	-9.518322388658985	3.330462231110831e-21
ENSG00000138468	SENP7	cg24192482	ENSG00000083814	ZNF671	119348	-8.429095693360154	5.1766530577690363e-17
ENSG00000138468	SENP7	cg24192482	ENSG00000204514	ZNF814	248328	-7.62471260776564	3.1959387272625697e-14
ENSG00000138468	SENP7	cg24192482	ENSG00000171649	ZIK1	-6623	-7.2474836076379585	5.287434325332476e-13
ENSG00000138468	SENP7	cg24192482	ENSG00000213762	ZNF134	13830	-6.717320150159126	2.1788905169341628e-11
ENSG00000138468	SENP7	cg24192482	ENSG00000197128	ZNF772	-122830	-6.660835017385253	3.188248284691746e-11
ENSG00000138468	SENP7	cg24192482	ENSG00000152433	ZNF547	-220835	-6.326889384447655	2.8464731379483324e-10
ENSG00000138468	SENP7	cg24192482	ENSG00000131845	ZNF304	-240502	-6.204520053110477	6.18424977704705e-10
ENSG00000138468	SENP7	cg24192482	ENSG00000121417	ZNF211	29990	-5.891017455738213	4.2330079379257635e-9
ENSG00000138468	SENP7	cg24192482	ENSG00000204519	ZNF551	81566	-5.804840483635085	7.066825361976968e-9
ENSG00000138468	SENP7	cg24192482	ENSG00000105136	ZNF419	-105720	-5.607575999178809	2.224622874213725e-8
ENSG00000138468	SENP7	cg24192482	ENSG00000083817	ZNF416	-21473	-5.508469178021446	3.903464054324117e-8
ENSG00000138468	SENP7	cg24192482	ENSG00000183647	ZNF530	0	-4.955710079132765	7.577730845738e-7
ENSG00000138468	SENP7	cg24192482	ENSG00000121406	ZNF549	-42858	-4.855583548337986	1.2573631323145498e-6
ENSG00000138468	SENP7	cg24214260	ENSG00000179909	ZNF154	15512	-16.909106750944666	1.591342228530566e-61
ENSG00000138468	SENP7	cg24214260	ENSG00000196724	ZNF418	240029	-15.131326031259974	5.031065754045449e-50
ENSG00000138468	SENP7	cg24214260	ENSG00000083814	ZNF671	37896	-11.791224696207466	1.8962354012500766e-31
ENSG00000138468	SENP7	cg24214260	ENSG00000204519	ZNF551	114	-11.143677967008976	2.510272700368297e-28
ENSG00000138468	SENP7	cg24214260	ENSG00000204514	ZNF814	166876	-9.912289995514127	7.775339610240691e-23
ENSG00000138468	SENP7	cg24214260	ENSG00000213762	ZNF134	-58496	-9.731622825427905	4.432119431134535e-22
ENSG00000138468	SENP7	cg24214260	ENSG00000171649	ZIK1	-88075	-9.470384164859809	5.210597504064864e-21
ENSG00000138468	SENP7	cg24214260	ENSG00000121417	ZNF211	-39073	-8.433873305749593	4.9739030767832885e-17
ENSG00000138468	SENP7	cg24214260	ENSG00000197128	ZNF772	-204282	-8.345638361706497	1.036764447773126e-16
ENSG00000138468	SENP7	cg24214260	ENSG00000152443	ZNF776	64941	-7.15192911506831	1.0538319332601618e-12
ENSG00000138468	SENP7	cg24214260	ENSG00000105136	ZNF419	-187172	-6.609480407916675	4.49493560992539e-11
ENSG00000138468	SENP7	cg24214260	ENSG00000121406	ZNF549	-124310	-6.259869765016151	4.361379480569376e-10
ENSG00000138468	SENP7	cg24214260	ENSG00000152439	ZNF773	-163448	-6.1340767733596975	9.604953223137989e-10
ENSG00000138468	SENP7	cg24214260	ENSG00000183647	ZNF530	-69130	-6.075616822890746	1.3792230824512445e-9
ENSG00000138468	SENP7	cg24214260	ENSG00000173480	ZNF417	218441	-5.596074856687726	2.3757521609564984e-8
ENSG00000138468	SENP7	cg24214260	ENSG00000083817	ZNF416	-102925	-5.281511432614811	1.3661207552554687e-7
ENSG00000138468	SENP7	cg24368848	ENSG00000121413	ZSCAN18	50043	-9.98442165688107	3.8490150103458e-23
ENSG00000138468	SENP7	cg24368848	ENSG00000196724	ZNF418	-98398	-8.235963727675374	2.5574973286076055e-16
ENSG00000138468	SENP7	cg24368848	ENSG00000176293	ZNF135	25445	-7.233805600011752	5.839124132073269e-13
ENSG00000138468	SENP7	cg24368848	ENSG00000152454	ZNF256	-86116	-4.608604005675447	4.2108567388228554e-6
ENSG00000138468	SENP7	cg24368848	ENSG00000181894	ZNF329	92457	-4.376784211229234	1.2426172018386461e-5
ENSG00000138468	SENP7	cg24368848	ENSG00000171606	ZNF274	149234	-4.366791856305081	1.3004707023441485e-5
ENSG00000138468	SENP7	cg24368848	ENSG00000204514	ZNF814	-144717	-4.3116360701837255	1.668994963787845e-5
ENSG00000138468	SENP7	cg24413918	ENSG00000196724	ZNF418	-69338	-15.129651724363779	5.15202401487832e-50
ENSG00000138468	SENP7	cg24413918	ENSG00000121413	ZSCAN18	79103	-14.83450051714165	3.2769925136468523e-48
ENSG00000138468	SENP7	cg24413918	ENSG00000176593	CTD-2368P22.1	0	-14.431439366798362	8.485546154249814e-46
ENSG00000138468	SENP7	cg24413918	ENSG00000176293	ZNF135	54505	-12.950024715562316	1.97802751147776e-37
ENSG00000138468	SENP7	cg24413918	ENSG00000173480	ZNF417	-88121	-10.320309149919785	1.3694920651337119e-24
ENSG00000138468	SENP7	cg24413918	ENSG00000181894	ZNF329	121517	-9.353288101629643	1.5412668862798123e-20
ENSG00000138468	SENP7	cg24413918	ENSG00000171606	ZNF274	178294	-8.275678409088808	1.8466117884776867e-16
ENSG00000138468	SENP7	cg24413918	ENSG00000166704	ZNF606	-1382	-8.191167801187317	3.68629824003715e-16
ENSG00000138468	SENP7	cg24413918	ENSG00000152454	ZNF256	-57056	-6.459691267826852	1.2068991401378857e-10
ENSG00000138468	SENP7	cg24413918	ENSG00000204514	ZNF814	-115657	-4.655376582362505	3.364200618385964e-6
ENSG00000138468	SENP7	cg24794228	ENSG00000161551	ZNF577	0	-33.10171110929357	3.88327319801847e-207
ENSG00000138468	SENP7	cg24794228	ENSG00000198093	ZNF649	1309	-18.87416251327024	1.8644547155468404e-75
ENSG00000138468	SENP7	cg24794228	ENSG00000197608	ZNF841	176551	-6.48998377898288	9.90061513841511e-11
ENSG00000138468	SENP7	cg24794228	ENSG00000256087	ZNF432	143464	-5.163417821641336	2.571669369962464e-7
ENSG00000138468	SENP7	cg24834889	ENSG00000181666	HKR1	0	-37.75261063077861	1.1548452723085166e-258
ENSG00000138468	SENP7	cg24834889	ENSG00000245680	ZNF585B	-116350	-7.034984520401956	2.422686275835203e-12
ENSG00000138468	SENP7	cg25361961	ENSG00000179909	ZNF154	138685	-17.31749751464866	2.5679378274811607e-64
ENSG00000138468	SENP7	cg25361961	ENSG00000083814	ZNF671	161069	-15.880735301119596	9.674913753830113e-55
ENSG00000138468	SENP7	cg25361961	ENSG00000131845	ZNF304	-198781	-14.215273940096893	1.5815773317052062e-44
ENSG00000138468	SENP7	cg25361961	ENSG00000152433	ZNF547	-179114	-12.774184299954527	1.7224943307960523e-36
ENSG00000138468	SENP7	cg25361961	ENSG00000171649	ZIK1	19774	-12.538215504247145	3.016192851923055e-35
ENSG00000138468	SENP7	cg25361961	ENSG00000121417	ZNF211	71711	-12.498295533816199	4.872411240601668e-35
ENSG00000138468	SENP7	cg25361961	ENSG00000204519	ZNF551	123287	-11.627462122385037	1.2091579666328865e-30
ENSG00000138468	SENP7	cg25361961	ENSG00000213762	ZNF134	55551	-11.128606720023038	2.954412689961519e-28
ENSG00000138468	SENP7	cg25361961	ENSG00000197128	ZNF772	-81109	-11.048703753717996	6.984083205057834e-28
ENSG00000138468	SENP7	cg25361961	ENSG00000178229	ZNF543	-227903	-9.638603492079813	1.0734673305330437e-21
ENSG00000138468	SENP7	cg25361961	ENSG00000105136	ZNF419	-63999	-7.853780709399627	5.451043408507041e-15
ENSG00000138468	SENP7	cg25361961	ENSG00000152443	ZNF776	188114	-7.735984913227858	1.3618361923829392e-14
ENSG00000138468	SENP7	cg25361961	ENSG00000183647	ZNF530	41203	-7.338043186345514	2.7286861917090416e-13
ENSG00000138468	SENP7	cg25361961	ENSG00000121406	ZNF549	-1137	-6.216364091661189	5.740354199946674e-10
ENSG00000138468	SENP7	cg25361961	ENSG00000083817	ZNF416	12884	-4.976464736633979	6.814573139740827e-7
ENSG00000138468	SENP7	cg25361961	ENSG00000152439	ZNF773	-40275	-4.955030368660188	7.604067630996781e-7
ENSG00000138468	SENP7	cg25400396	ENSG00000196724	ZNF418	32691	-24.984232722670292	4.211511893682771e-126
ENSG00000138468	SENP7	cg25400396	ENSG00000179909	ZNF154	-179979	-21.26542244936394	5.017883050268603e-94
ENSG00000138468	SENP7	cg25400396	ENSG00000083814	ZNF671	-161566	-19.831034034460053	1.1108432221458121e-82
ENSG00000138468	SENP7	cg25400396	ENSG00000121413	ZSCAN18	194644	-16.11654565925251	2.8953633688194134e-56
ENSG00000138468	SENP7	cg25400396	ENSG00000204514	ZNF814	-116	-15.372501318598705	1.6039784612309134e-51
ENSG00000138468	SENP7	cg25400396	ENSG00000204519	ZNF551	-171889	-12.733751774733049	2.822688530186783e-36
ENSG00000138468	SENP7	cg25400396	ENSG00000152454	ZNF256	51640	-12.695022099929044	4.5244408876918947e-36
ENSG00000138468	SENP7	cg25400396	ENSG00000176293	ZNF135	170046	-12.606654390119512	1.3212736574680212e-35
ENSG00000138468	SENP7	cg25400396	ENSG00000121417	ZNF211	-246411	-12.411471018460736	1.3762642185833396e-34
ENSG00000138468	SENP7	cg25400396	ENSG00000181894	ZNF329	237058	-10.888972230950278	3.834213317766102e-27
ENSG00000138468	SENP7	cg25400396	ENSG00000152443	ZNF776	-131031	-9.987651465420859	3.729310054076484e-23
ENSG00000138468	SENP7	cg25400396	ENSG00000173480	ZNF417	11103	-6.49552590666404	9.547419110431844e-11
ENSG00000138468	SENP7	cg25400396	ENSG00000166704	ZNF606	87860	-4.296536188054011	1.7860852883608706e-05
ENSG00000138468	SENP7	cg25404914	ENSG00000188171	ZNF626	195094	-13.700069388127622	1.443042690126012e-41
ENSG00000138468	SENP7	cg25404914	ENSG00000237440	ZNF737	110858	-10.824274652584284	7.593328325497928e-27
ENSG00000138468	SENP7	cg25537993	ENSG00000121413	ZSCAN18	50021	-12.939805958339846	2.2447504243267965e-37
ENSG00000138468	SENP7	cg25537993	ENSG00000196724	ZNF418	-98420	-12.55985534830672	2.324360714584496e-35
ENSG00000138468	SENP7	cg25537993	ENSG00000176293	ZNF135	25423	-12.062333461033846	8.386412845798634e-33
ENSG00000138468	SENP7	cg25537993	ENSG00000181894	ZNF329	92435	-6.482166593477626	1.0420611614027187e-10
ENSG00000138468	SENP7	cg25537993	ENSG00000171606	ZNF274	149212	-6.463731369911875	1.1754974090526367e-10
ENSG00000138468	SENP7	cg25537993	ENSG00000204514	ZNF814	-144739	-6.401028088020374	1.766712746644075e-10
ENSG00000138468	SENP7	cg25537993	ENSG00000152454	ZNF256	-86138	-6.063862656522913	1.4827249279770087e-9
ENSG00000138468	SENP7	cg25537993	ENSG00000173480	ZNF417	-117203	-4.656889512836169	3.339746557875801e-6
ENSG00000138468	SENP7	cg25772438	ENSG00000197863	ZNF790	0	-5.5230812593718515	3.5950085278640354e-8
ENSG00000138468	SENP7	cg26263766	ENSG00000198131	ZNF544	224	-15.462723782508665	4.366934661873555e-52
ENSG00000138468	SENP7	cg26263766	ENSG00000121413	ZSCAN18	-109939	-11.85947394157486	8.701049920826442e-32
ENSG00000138468	SENP7	cg26263766	ENSG00000181894	ZNF329	-73256	-9.357219712924813	1.4864554048963896e-20
ENSG00000138468	SENP7	cg26263766	ENSG00000176293	ZNF135	-142056	-8.819878980292096	1.839020238484132e-18
ENSG00000138468	SENP7	cg26263766	ENSG00000171606	ZNF274	-14805	-8.355091522040924	9.586384503428045e-17
ENSG00000138468	SENP7	cg26263766	ENSG00000176593	CTD-2368P22.1	-217133	-4.56417320535038	5.201737627384869e-6
ENSG00000138468	SENP7	cg26356061	ENSG00000196724	ZNF418	-198	-24.57071974379714	2.3395188563153115e-122
ENSG00000138468	SENP7	cg26356061	ENSG00000179909	ZNF154	-226380	-15.016436799701978	2.554965569024789e-49
ENSG00000138468	SENP7	cg26356061	ENSG00000083814	ZNF671	-207967	-14.40542455620537	1.2090740540676594e-45
ENSG00000138468	SENP7	cg26356061	ENSG00000121413	ZSCAN18	148243	-13.615844607598612	4.306015845297578e-41
ENSG00000138468	SENP7	cg26356061	ENSG00000176293	ZNF135	123645	-11.157621902009922	2.1586640117052134e-28
ENSG00000138468	SENP7	cg26356061	ENSG00000204519	ZNF551	-218290	-9.365652856639832	1.375307185512249e-20
ENSG00000138468	SENP7	cg26356061	ENSG00000181894	ZNF329	190657	-9.26016806752095	3.6187411195924996e-20
ENSG00000138468	SENP7	cg26356061	ENSG00000152454	ZNF256	5239	-8.8611210319026	1.282496960977899e-18
ENSG00000138468	SENP7	cg26356061	ENSG00000171606	ZNF274	247434	-8.497439757459867	2.9171634517771975e-17
ENSG00000138468	SENP7	cg26356061	ENSG00000204514	ZNF814	-46517	-7.800191259443119	8.280894200731746e-15
ENSG00000138468	SENP7	cg26356061	ENSG00000152443	ZNF776	-177432	-5.611848215115081	2.1708976783069342e-8
ENSG00000138468	SENP7	cg26356061	ENSG00000173480	ZNF417	-18981	-5.184763675669367	2.2960474048088735e-7
ENSG00000138468	SENP7	cg26465391	ENSG00000179909	ZNF154	-193	-30.696732474809313	8.718613980365233e-182
ENSG00000138468	SENP7	cg26465391	ENSG00000083814	ZNF671	10344	-18.779581376823735	9.31804258169485e-75
ENSG00000138468	SENP7	cg26465391	ENSG00000196724	ZNF418	212477	-18.748478706562214	1.579436428430725e-74
ENSG00000138468	SENP7	cg26465391	ENSG00000204519	ZNF551	0	-16.084247928705672	4.694088319761771e-56
ENSG00000138468	SENP7	cg26465391	ENSG00000204514	ZNF814	139324	-13.27396567690389	3.425999184530202e-39
ENSG00000138468	SENP7	cg26465391	ENSG00000121417	ZNF211	-66625	-11.708469164379562	4.850147895873727e-31
ENSG00000138468	SENP7	cg26465391	ENSG00000213762	ZNF134	-86048	-10.788417254118736	1.1071528352602895e-26
ENSG00000138468	SENP7	cg26465391	ENSG00000171649	ZIK1	-115627	-10.469191433243264	3.0221011610768906e-25
ENSG00000138468	SENP7	cg26465391	ENSG00000152454	ZNF256	231426	-10.219152811860623	3.780209652414008e-24
ENSG00000138468	SENP7	cg26465391	ENSG00000197128	ZNF772	-231834	-9.449143783182445	6.349276073048034e-21
ENSG00000138468	SENP7	cg26465391	ENSG00000152443	ZNF776	37389	-8.81968903864166	1.842068791238744e-18
ENSG00000138468	SENP7	cg26465391	ENSG00000105136	ZNF419	-214724	-7.116298081684551	1.359913106202236e-12
ENSG00000138468	SENP7	cg26465391	ENSG00000173480	ZNF417	190889	-7.042301641545635	2.3005937611871983e-12
ENSG00000138468	SENP7	cg26465391	ENSG00000121406	ZNF549	-151862	-6.79332801805476	1.2993539722385735e-11
ENSG00000138468	SENP7	cg26465391	ENSG00000183647	ZNF530	-96682	-6.750279130238474	1.7424976629928816e-11
ENSG00000138468	SENP7	cg26465391	ENSG00000152439	ZNF773	-191000	-5.999296360382286	2.2012889602414e-9
ENSG00000138468	SENP7	cg26465391	ENSG00000083817	ZNF416	-130477	-5.0230810622756	5.361052485552583e-7
ENSG00000138468	SENP7	cg26662727	ENSG00000131845	ZNF304	-76375	-13.23513098181988	5.59742855748876e-39
ENSG00000138468	SENP7	cg26662727	ENSG00000152433	ZNF547	-56708	-11.462691799742387	7.616166572493156e-30
ENSG00000138468	SENP7	cg26662727	ENSG00000121417	ZNF211	194117	-9.318024708901646	2.1313440727480918e-20
ENSG00000138468	SENP7	cg26662727	ENSG00000204519	ZNF551	245693	-8.969726117578276	4.927358866813021e-19
ENSG00000138468	SENP7	cg26662727	ENSG00000213762	ZNF134	177957	-7.927187112350845	3.060888833574334e-15
ENSG00000138468	SENP7	cg26662727	ENSG00000171649	ZIK1	142180	-7.721269805926328	1.5254748345600608e-14
ENSG00000138468	SENP7	cg26662727	ENSG00000178229	ZNF543	-105497	-7.41140383411748	1.5877584461186094e-13
ENSG00000138468	SENP7	cg26662727	ENSG00000121406	ZNF549	91049	-6.188761109545384	6.827138717827586e-10
ENSG00000138468	SENP7	cg26662727	ENSG00000152439	ZNF773	63639	-6.0193641814005066	1.94768998141175e-9
ENSG00000138468	SENP7	cg26662727	ENSG00000105136	ZNF419	51435	-5.946034915612497	3.0406083853537877e-9
ENSG00000138468	SENP7	cg26662727	ENSG00000197128	ZNF772	30387	-5.6942443452340745	1.3502367141483444e-8
ENSG00000138468	SENP7	cg26671652	ENSG00000196724	ZNF418	0	-11.576414782033146	2.1438971825338773e-30
ENSG00000138468	SENP7	cg26671652	ENSG00000179909	ZNF154	-225732	-8.342503705716375	1.0640325403181093e-16
ENSG00000138468	SENP7	cg26671652	ENSG00000083814	ZNF671	-207319	-7.312258318313245	3.2967993636142757e-13
ENSG00000138468	SENP7	cg26671652	ENSG00000121413	ZSCAN18	148891	-7.159872015216142	9.95439351882714e-13
ENSG00000138468	SENP7	cg26671652	ENSG00000171606	ZNF274	248082	-5.905857450800859	3.8726987680485186e-9
ENSG00000138468	SENP7	cg26671652	ENSG00000204519	ZNF551	-217642	-5.374058776018839	8.245083602322486e-8
ENSG00000138468	SENP7	cg26671652	ENSG00000181894	ZNF329	191305	-5.333547967447178	1.0294826558774776e-7
ENSG00000138468	SENP7	cg26671652	ENSG00000204514	ZNF814	-45869	-5.204951198957884	2.0617990708072813e-7
ENSG00000138468	SENP7	cg26671652	ENSG00000152454	ZNF256	5887	-4.949009172804317	7.841255486852871e-7
ENSG00000138468	SENP7	cg26671652	ENSG00000176293	ZNF135	124293	-4.888731163789735	1.0644104585823838e-6
ENSG00000138468	SENP7	cg26698460	ENSG00000198131	ZNF544	23954	6.848669896528115	8.887509704465664e-12
ENSG00000138468	SENP7	cg26698460	ENSG00000171606	ZNF274	0	6.3558955888173445	2.363372894498575e-10
ENSG00000138468	SENP7	cg26698460	ENSG00000121413	ZSCAN18	-86209	5.945176531760719	3.0564116259258673e-9
ENSG00000138468	SENP7	cg26698460	ENSG00000176293	ZNF135	-118326	5.684835668837718	1.4259347618234097e-8
ENSG00000138468	SENP7	cg26713179	ENSG00000167555	ZNF528	128729	-5.713369349265731	1.208214276621585e-8
ENSG00000138468	SENP7	cg26713179	ENSG00000197608	ZNF841	-173352	-5.171682415397374	2.4613591440953657e-7
ENSG00000138468	SENP7	cg26713179	ENSG00000221923	ZNF880	100797	-4.317203172612246	1.627701570336351e-5
ENSG00000138468	SENP7	cg26734888	ENSG00000181666	HKR1	0	-32.42083417775625	7.345845596885782e-200
ENSG00000138468	SENP7	cg27046034	ENSG00000204514	ZNF814	79296	-13.100834140982707	3.0269426030272486e-38
ENSG00000138468	SENP7	cg27046034	ENSG00000083814	ZNF671	-41808	-11.155947188420757	2.198163893172066e-28
ENSG00000138468	SENP7	cg27046034	ENSG00000179909	ZNF154	-60221	-10.469280767611522	3.019344289617934e-25
ENSG00000138468	SENP7	cg27046034	ENSG00000269343	ZNF587B	50296	-9.262205001032068	3.5521059425258184e-20
ENSG00000138468	SENP7	cg27046034	ENSG00000196724	ZNF418	152449	-9.123663979815728	1.2465863950261646e-19
ENSG00000138468	SENP7	cg27046034	ENSG00000204519	ZNF551	-52131	-6.740371226564661	1.863791161839839e-11
ENSG00000138468	SENP7	cg27046034	ENSG00000213762	ZNF134	-146076	-6.497010291980638	9.454932096461378e-11
ENSG00000138468	SENP7	cg27046034	ENSG00000152454	ZNF256	171398	-6.467264307884562	1.1486935145338818e-10
ENSG00000138468	SENP7	cg27046034	ENSG00000121417	ZNF211	-126653	-5.916666397547628	3.629244698758592e-9
ENSG00000138468	SENP7	cg27046034	ENSG00000171649	ZIK1	-175655	-5.376138860285149	8.151281169636414e-8
ENSG00000138468	SENP7	cg27046034	ENSG00000176593	CTD-2368P22.1	232626	-4.308091979934946	1.695801180369124e-5
ENSG00000138468	SENP7	cg27049766	ENSG00000179909	ZNF154	0	-31.48268667431747	5.828704572696522e-190
ENSG00000138468	SENP7	cg27049766	ENSG00000196724	ZNF418	212734	-21.831799638076827	1.139815531294245e-98
ENSG00000138468	SENP7	cg27049766	ENSG00000083814	ZNF671	10601	-21.514237830154926	4.695623921357014e-96
ENSG00000138468	SENP7	cg27049766	ENSG00000204519	ZNF551	0	-16.579177501428884	2.612410413836677e-59
ENSG00000138468	SENP7	cg27049766	ENSG00000204514	ZNF814	139581	-14.97707273068126	4.447544022477536e-49
ENSG00000138468	SENP7	cg27049766	ENSG00000121417	ZNF211	-66368	-13.698782295287495	1.4674193259597478e-41
ENSG00000138468	SENP7	cg27049766	ENSG00000171649	ZIK1	-115370	-12.370726759424509	2.2353833028554586e-34
ENSG00000138468	SENP7	cg27049766	ENSG00000213762	ZNF134	-85791	-11.92149813541187	4.2715052488614106e-32
ENSG00000138468	SENP7	cg27049766	ENSG00000152454	ZNF256	231683	-11.895448383738097	5.76145474529435e-32
ENSG00000138468	SENP7	cg27049766	ENSG00000197128	ZNF772	-231577	-9.979420131063023	4.041935633938886e-23
ENSG00000138468	SENP7	cg27049766	ENSG00000152443	ZNF776	37646	-9.792358117849297	2.4770370777351635e-22
ENSG00000138468	SENP7	cg27049766	ENSG00000105136	ZNF419	-214467	-7.832109965136897	6.457352942531155e-15
ENSG00000138468	SENP7	cg27049766	ENSG00000183647	ZNF530	-96425	-7.612118354332806	3.517342638926506e-14
ENSG00000138468	SENP7	cg27049766	ENSG00000121406	ZNF549	-151605	-6.652268603231305	3.376836621560041e-11
ENSG00000138468	SENP7	cg27049766	ENSG00000152439	ZNF773	-190743	-6.632239588904314	3.8614192449400997e-11
ENSG00000138468	SENP7	cg27049766	ENSG00000173480	ZNF417	191146	-6.465606118931227	1.1611986809376543e-10
ENSG00000138468	SENP7	cg27049766	ENSG00000083817	ZNF416	-130220	-6.2792793097074036	3.8560552163349676e-10
ENSG00000138468	SENP7	cg27112264	ENSG00000196724	ZNF418	32746	-22.375542350588503	3.267216259240872e-103
ENSG00000138468	SENP7	cg27112264	ENSG00000179909	ZNF154	-179924	-19.628558806999383	3.9611513370901195e-81
ENSG00000138468	SENP7	cg27112264	ENSG00000083814	ZNF671	-161511	-16.6494987716782	8.870102720104489e-60
ENSG00000138468	SENP7	cg27112264	ENSG00000121413	ZSCAN18	194699	-14.928028111755518	8.857194894183133e-49
ENSG00000138468	SENP7	cg27112264	ENSG00000204514	ZNF814	-61	-13.855279270487518	1.894877758550902e-42
ENSG00000138468	SENP7	cg27112264	ENSG00000176293	ZNF135	170101	-13.113994645158323	2.567231253058075e-38
ENSG00000138468	SENP7	cg27112264	ENSG00000204519	ZNF551	-171834	-12.992377445481399	1.1698605971010704e-37
ENSG00000138468	SENP7	cg27112264	ENSG00000152454	ZNF256	51695	-11.965424295916334	2.575557494546027e-32
ENSG00000138468	SENP7	cg27112264	ENSG00000121417	ZNF211	-246356	-11.761254166806069	2.6662610690285297e-31
ENSG00000138468	SENP7	cg27112264	ENSG00000181894	ZNF329	237113	-10.735217650027261	1.9331993488513526e-26
ENSG00000138468	SENP7	cg27112264	ENSG00000152443	ZNF776	-130976	-9.488376823640793	4.4059150224733985e-21
ENSG00000138468	SENP7	cg27112264	ENSG00000173480	ZNF417	11158	-7.665977656659562	2.332348105351648e-14
ENSG00000138468	SENP7	cg27112264	ENSG00000269343	ZNF587B	-30485	-4.664624386713659	3.217366300099537e-6
ENSG00000138468	SENP7	cg27199827	ENSG00000101310	SEC23B	-25915	-4.460788178135612	8.44455861455811e-6
ENSG00000138468	SENP7	cg27324426	ENSG00000179909	ZNF154	-257	-29.07441705039659	2.8175925039751543e-165
ENSG00000138468	SENP7	cg27324426	ENSG00000196724	ZNF418	212413	-18.923051099210902	8.095880294072602e-76
ENSG00000138468	SENP7	cg27324426	ENSG00000083814	ZNF671	10280	-18.480621025831606	1.4441325507004956e-72
ENSG00000138468	SENP7	cg27324426	ENSG00000204519	ZNF551	0	-15.33994609562533	2.5608414710487143e-51
ENSG00000138468	SENP7	cg27324426	ENSG00000204514	ZNF814	139260	-13.599684344994998	5.307381052551145e-41
ENSG00000138468	SENP7	cg27324426	ENSG00000121417	ZNF211	-66689	-11.429453099925105	1.1008137535904643e-29
ENSG00000138468	SENP7	cg27324426	ENSG00000171649	ZIK1	-115691	-10.534974044108399	1.5402967386365357e-25
ENSG00000138468	SENP7	cg27324426	ENSG00000213762	ZNF134	-86112	-10.301116721149649	1.6616094939086372e-24
ENSG00000138468	SENP7	cg27324426	ENSG00000152454	ZNF256	231362	-9.711780531767381	5.35608586332943e-22
ENSG00000138468	SENP7	cg27324426	ENSG00000197128	ZNF772	-231898	-8.997165226277058	3.8628650056979274e-19
ENSG00000138468	SENP7	cg27324426	ENSG00000152443	ZNF776	37325	-8.82317994582895	1.7868289722875357e-18
ENSG00000138468	SENP7	cg27324426	ENSG00000105136	ZNF419	-214788	-6.6896022952552	2.6273668166900544e-11
ENSG00000138468	SENP7	cg27324426	ENSG00000183647	ZNF530	-96746	-6.201440229669709	6.305059748743041e-10
ENSG00000138468	SENP7	cg27324426	ENSG00000173480	ZNF417	190825	-6.013645866271143	2.0168971541991855e-9
ENSG00000138468	SENP7	cg27324426	ENSG00000121406	ZNF549	-151926	-5.925758588893134	3.436056152602856e-9
ENSG00000138468	SENP7	cg27324426	ENSG00000152439	ZNF773	-191064	-5.764109504654787	8.98181482943199e-9
ENSG00000138468	SENP7	cg27324426	ENSG00000083817	ZNF416	-130541	-4.545410489922034	5.684113397243012e-6
ENSG00000138468	SENP7	cg27353143	ENSG00000198182	ZNF607	-97365	-6.930640315755406	5.037013278748785e-12
ENSG00000138468	SENP7	cg27371091	ENSG00000121417	ZNF211	0	-11.450738791947476	8.695901875816465e-30
ENSG00000138468	SENP7	cg27371091	ENSG00000179909	ZNF154	63649	-10.921356944583287	2.719739050283613e-27
ENSG00000138468	SENP7	cg27371091	ENSG00000083814	ZNF671	86033	-8.94705274740783	6.021900109147712e-19
ENSG00000138468	SENP7	cg27371091	ENSG00000204519	ZNF551	48251	-6.3142748512631535	3.0855174448276335e-10
ENSG00000138468	SENP7	cg27371091	ENSG00000213762	ZNF134	-10359	-5.8917505363959695	4.214466958317818e-9
ENSG00000138468	SENP7	cg27371091	ENSG00000204514	ZNF814	215013	-5.739328182436292	1.0384643153955266e-8
ENSG00000138468	SENP7	cg27371091	ENSG00000171649	ZIK1	-39938	-5.054285332256541	4.5604736166618884e-7
ENSG00000138468	SENP7	cg27371091	ENSG00000105136	ZNF419	-139035	-4.89809386289222	1.0152932957350592e-6
ENSG00000138468	SENP7	cg27391267	ENSG00000121413	ZSCAN18	49870	-9.341888017377366	1.7117573517485575e-20
ENSG00000138468	SENP7	cg27391267	ENSG00000196724	ZNF418	-98571	-8.12551555201897	6.278146121917888e-16
ENSG00000138468	SENP7	cg27391267	ENSG00000176293	ZNF135	25272	-7.474960842031573	9.891864958717937e-14
ENSG00000138468	SENP7	cg27391267	ENSG00000152454	ZNF256	-86289	-4.427100233696833	9.867342999136637e-6
