# Supplementary material for: Genome-wide identification of genes regulating DNA methylation using genetic anchors for causal inference
Source: Genome Biol. 2020 Aug 28;21:220. doi: 10.1186/s13059-020-02114-z (PMC7453518; doi:10.1186/s13059-020-02114-z)
Supplement: Supplementary file 18 — Additional file 18: Table S18. OMIM phenotypes linked to the identified genes. [file 13059_2020_2114_MOESM18_ESM.csv]

Ensembl_ID	HGNC_ID	Phenotype	Phenotype_MIM
ENSG00000162711	NLRP3	CINCA syndrome	607115
ENSG00000162711	NLRP3	Deafness, autosomal dominant 34, with or without inflammation	617772
ENSG00000162711	NLRP3	Familial cold inflammatory syndrome 1	120100
ENSG00000162711	NLRP3	Keratoendothelitis fugax hereditaria	148200
ENSG00000162711	NLRP3	Muckle-Wells syndrome	191900
ENSG00000169762	TAPT1	Osteochondrodysplasia, complex lethal, Symoens-Barnes-Gistelinck type	616897
ENSG00000122687	FTSJ2	?Mitochondrial DNA depletion syndrome 17	618567
ENSG00000109320	NFKB1	Immunodeficiency, common variable, 12	616576
ENSG00000135678	CPM	Hailey-Hailey disease	169600
ENSG00000060069	CTDP1	Congenital cataracts, facial dysmorphism, and neuropathy	604168
ENSG00000144354	CDCA7	Immunodeficiency-centromeric instability-facial anomalies syndrome 3	616910
ENSG00000107968	MAP3K8	Lung cancer, somatic	211980
ENSG00000074800	ENO1	Enolase deficiency	NA
ENSG00000162367	TAL1	Leukemia, T-cell acute lymphocytic, somatic	613065
ENSG00000258839	MC1R	[Analgesia from kappa-opioid receptor agonist, female-specific]	613098
ENSG00000258839	MC1R	[Skin/hair/eye pigmentation 2, blond hair/fair skin]	266300
ENSG00000258839	MC1R	[Skin/hair/eye pigmentation 2, red hair/fair skin]	266300
ENSG00000258839	MC1R	{Albinism, oculocutaneous, type II, modifier of}	203200
ENSG00000258839	MC1R	{Melanoma, cutaneous malignant, 5}	613099
ENSG00000258839	MC1R	{UV-induced skin damage}	266300
ENSG00000113916	BCL6	Lymphoma, B-cell	109565
ENSG00000119772	DNMT3A	Acute myeloid leukemia, somatic	601626
ENSG00000119772	DNMT3A	Heyn-Sproul-Jackson syndrome	618724
ENSG00000119772	DNMT3A	Tatton-Brown-Rahman syndrome	615879
ENSG00000101109	STK4	T-cell immunodeficiency, recurrent infections, autoimmunity, and cardiac malformations	614868
ENSG00000128829	EIF2AK4	Pulmonary venoocclusive disease 2	234810
ENSG00000008710	PKD1	Polycystic kidney disease 1	173900
ENSG00000156973	PDE6D	?Joubert syndrome 22	615665
ENSG00000204104	TRAF3IP1	Senior-Loken syndrome 9	616629
ENSG00000149260	CAPN5	Vitreoretinopathy, neovascular inflammatory	193235
ENSG00000171298	GAA	Glycogen storage disease II	232300
ENSG00000062598	ELMO2	Vascular malformation, primary intraosseous	606893
ENSG00000137265	IRF4	[Skin/hair/eye pigmentation, variation in, 8]	611724
ENSG00000167658	EEF2	?Spinocerebellar ataxia 26	609306
ENSG00000117139	KDM5B	Mental retardation, autosomal recessive 65	618109
ENSG00000185811	IKZF1	Immunodeficiency, common variable, 13	616873
ENSG00000130598	TNNI2	Arthrogryposis, distal, type 2B1	601680
ENSG00000168411	RFWD3	?Fanconi anemia, complementation group W	617784
ENSG00000125864	BFSP1	Cataract 33, multiple types	611391
ENSG00000197471	SPN	?Dyskinesia, seizures, and intellectual developmental disorder	617171
ENSG00000197471	SPN	Mental retardation, autosomal dominant 24	615828
ENSG00000197471	SPN	?Spermatogenic failure 30	618110
ENSG00000197471	SPN	?Usher syndrome, type 1M	618632
ENSG00000197471	SPN	Deafness, autosomal recessive 36	609006
ENSG00000197471	SPN	Deafness, neurosensory, without vestibular involvement, autosomal dominant	609006
ENSG00000135503	ACVR1B	Pancreatic cancer, somatic	NA
ENSG00000104267	CA2	?Spinocerebellar ataxia 26	609306
ENSG00000104267	CA2	Osteopetrosis, autosomal recessive 3, with renal tubular acidosis	259730
ENSG00000085491	SLC25A24	Fontaine progeroid syndrome	612289
ENSG00000101439	CST3	{Macular degeneration, age-related, 11}	611953
ENSG00000101439	CST3	Cerebral amyloid angiopathy	105150
ENSG00000184743	ATL3	Neuropathy, hereditary sensory, type IF	615632
ENSG00000145495	MARCH6	Epilepsy, familial adult myoclonic, 3	613608
ENSG00000013573	DDX11	Warsaw breakage syndrome	613398
ENSG00000091592	NLRP1	?Respiratory papillomatosis, juvenile recurrent, congenital	618803
ENSG00000091592	NLRP1	{Vitiligo-associated multiple autoimmune disease susceptibility 1}	606579
ENSG00000091592	NLRP1	Autoinflammation with arthritis and dyskeratosis	617388
ENSG00000091592	NLRP1	Palmoplantar carcinoma, multiple self-healing	615225
ENSG00000229833	PET100	Mitochondrial complex IV deficiency	220110
ENSG00000148655	C10orf11	Albinism, oculocutaneous, type VII	615179
ENSG00000172005	MAL	{Malaria, mild, susceptibility to}	609148
ENSG00000172005	MAL	?Immunodeficiency 66	618847
ENSG00000129003	VPS13C	Parkinson disease 23, autosomal recessive, early onset	616840
ENSG00000134684	YARS	Charcot-Marie-Tooth disease, dominant intermediate C	608323
ENSG00000146918	NCAPG2	Khan-Khan-Katsanis syndrome	618460
ENSG00000126870	WDR60	Short-rib thoracic dysplasia 8 with or without polydactyly	615503
ENSG00000072274	TFRC	Immunodeficiency 46	616740
ENSG00000172037	LAMB2	Epidermolysis bullosa, junctional, Herlitz type	226700
ENSG00000172037	LAMB2	Epidermolysis bullosa, junctional, non-Herlitz type	226650
ENSG00000172037	LAMB2	Nephrotic syndrome, type 5, with or without ocular abnormalities	614199
ENSG00000172037	LAMB2	Pierson syndrome	609049
ENSG00000177030	DEAF1	?Dyskinesia, seizures, and intellectual developmental disorder	617171
ENSG00000177030	DEAF1	Mental retardation, autosomal dominant 24	615828
ENSG00000135845	PIGC	Glycosylphosphatidylinositol biosynthesis defect 16	617816
ENSG00000087460	GNAS	Pseudohypoparathyroidism, type IB	603233
ENSG00000087460	GNAS	ACTH-independent macronodular adrenal hyperplasia	219080
ENSG00000087460	GNAS	McCune-Albright syndrome, somatic, mosaic	174800
ENSG00000087460	GNAS	Osseous heteroplasia, progressive	166350
ENSG00000087460	GNAS	Pituitary adenoma 3, multiple types, somatic	617686
ENSG00000087460	GNAS	Pseudohypoparathyroidism Ia	103580
ENSG00000087460	GNAS	Pseudohypoparathyroidism Ib	603233
ENSG00000087460	GNAS	Pseudohypoparathyroidism Ic	612462
ENSG00000087460	GNAS	Pseudopseudohypoparathyroidism	612463
ENSG00000180509	KCNE1	Jervell and Lange-Nielsen syndrome 2	612347
ENSG00000180509	KCNE1	Long QT syndrome 5	613695
ENSG00000225190	PLEKHM1	?Osteopetrosis, autosomal recessive 6	611497
ENSG00000225190	PLEKHM1	Osteopetrosis, autosomal dominant 3	618107
ENSG00000131165	CHMP1A	Pontocerebellar hypoplasia, type 8	614961
ENSG00000119686	FLVCR2	Proliferative vasculopathy and hydranencephaly-hydrocephaly syndrome	225790
ENSG00000172059	KLF11	Maturity-onset diabetes of the young, type VII	610508
ENSG00000127507	EMR2	Vibratory urticaria	125630
ENSG00000180921	FAM83H	Amelogenesis imperfecta, type IIIA	130900
ENSG00000152582	SPEF2	Spermatogenic failure 43	618751
ENSG00000132600	PRMT7	Short stature, brachydactyly, intellectual developmental disability, and seizures	617157
ENSG00000160949	TONSL	Spondyloepimetaphyseal dysplasia, sponastrime type	271510
ENSG00000086062	B4GALT1	Congenital disorder of glycosylation, type IId	607091
ENSG00000095380	NANS	Spondyloepimetaphyseal dysplasia, Camera-Genevieve type	610442
ENSG00000156414	TDRD9	?Spermatogenic failure 30	618110
ENSG00000134183	GNAT2	Achromatopsia 4	613856
ENSG00000148600	CDHR1	Cone-rod dystrophy 15	613660
ENSG00000148600	CDHR1	Retinitis pigmentosa 65	613660
ENSG00000144455	SUMF1	Multiple sulfatase deficiency	272200
ENSG00000166123	GPT2	Mental retardation, autosomal recessive 49	616281
ENSG00000112306	RPS12	Combined oxidative phosphorylation deficiency 32	617664
ENSG00000174684	B3GNT1	Muscular dystrophy-dystroglycanopathy (congenital with brain and eye anomalies), type A, 13	615287
ENSG00000171444	MCC	Colorectal cancer, somatic	114500
ENSG00000165702	GFI1B	Bleeding disorder, platelet-type, 17	187900
ENSG00000123552	USP45	?Leber congenital amaurosis 19	618513
ENSG00000125618	PAX8	Hypothyroidism, congenital, due to thyroid dysgenesis or hypoplasia	218700
ENSG00000196352	CD55	[Blood group Cromer]	613793
ENSG00000196352	CD55	Complement hyperactivation, angiopathic thrombosis, and protein-losing enteropathy	226300
ENSG00000124370	MCEE	Methylmalonyl-CoA epimerase deficiency	251120
ENSG00000118965	WDR35	Cranioectodermal dysplasia 2	613610
ENSG00000118965	WDR35	Short-rib thoracic dysplasia 7 with or without polydactyly	614091
ENSG00000141510	TP53	{Adrenocortical carcinoma, pediatric}	202300
ENSG00000141510	TP53	{Basal cell carcinoma 7}	614740
ENSG00000141510	TP53	{Choroid plexus papilloma}	260500
ENSG00000141510	TP53	{Colorectal cancer}	114500
ENSG00000141510	TP53	{Glioma susceptibility 1}	137800
ENSG00000141510	TP53	{Osteosarcoma}	259500
ENSG00000141510	TP53	Bone marrow failure syndrome 5	618165
ENSG00000141510	TP53	Breast cancer, somatic	114480
ENSG00000141510	TP53	Hepatocellular carcinoma, somatic	114550
ENSG00000141510	TP53	Li-Fraumeni syndrome	151623
ENSG00000141510	TP53	Nasopharyngeal carcinoma, somatic	607107
ENSG00000141510	TP53	Pancreatic cancer, somatic	260350
ENSG00000141510	TP53	Galloway-Mowat syndrome 4	617730
ENSG00000149781	FERMT3	Leukocyte adhesion deficiency, type III	612840
ENSG00000069869	NEDD4	Periventricular nodular heterotopia 7	617201
ENSG00000187446	CHP1	?Spastic ataxia 9, autosomal recessive	618438
ENSG00000167522	ANKRD11	KBG syndrome	148050
ENSG00000247626	MARS2	?Combined oxidative phosphorylation deficiency 25	616430
ENSG00000247626	MARS2	Spastic ataxia 3, autosomal recessive	611390
ENSG00000103313	MEFV	Familial Mediterranean fever, AD	134610
ENSG00000103313	MEFV	Familial Mediterranean fever, AR	249100
ENSG00000100997	ABHD12	Polyneuropathy, hearing loss, ataxia, retinitis pigmentosa, and cataract	612674
ENSG00000000971	CFH	{Hemolytic uremic syndrome, atypical, susceptibility to, 1}	235400
ENSG00000000971	CFH	{Macular degeneration, age-related, 4}	610698
ENSG00000000971	CFH	Basal laminar drusen	126700
ENSG00000000971	CFH	Complement factor H deficiency	609814
ENSG00000160695	VPS11	Leukodystrophy, hypomyelinating, 12	616683
ENSG00000145725	PPIP5K2	Deafness, autosomal recessive 100	618422
ENSG00000176915	ANKLE2	Microcephaly 16, primary, autosomal recessive	616681
ENSG00000164344	KLKB1	Fletcher factor (prekallikrein) deficiency	612423
ENSG00000145476	CYP4V2	Bietti crystalline corneoretinal dystrophy	210370
ENSG00000100365	NCF4	?Granulomatous disease, chronic, autosomal recessive, cytochrome b-positive, type III	613960
ENSG00000141543	EIF4A3	Robin sequence with cleft mandible and limb anomalies	268305
ENSG00000174177	CTU2	Microcephaly, facial dysmorphism, renal agenesis, and ambiguous genitalia syndrome	618142
ENSG00000070669	ASNS	Asparagine synthetase deficiency	615574
ENSG00000110057	UNC93B1	{Encephalopathy, acute, infection-induced (herpes-specific), susceptibility to, 1}	610551
ENSG00000153574	RPIA	Ribose 5-phosphate isomerase deficiency	608611
ENSG00000188157	AGRN	Myasthenic syndrome, congenital, 8, with pre- and postsynaptic defects	615120
ENSG00000124299	PEPD	Prolidase deficiency	170100
ENSG00000150048	CLEC1A	{Aspergillosis, susceptibility to}	614079
ENSG00000160294	MCM3AP	Peripheral neuropathy, autosomal recessive, with or without impaired intellectual development	618124
ENSG00000145217	SLC26A1	?Nephrolithiasis, calcium oxalate	167030
ENSG00000127666	TICAM1	{Encephalopathy, acute, infection-induced (herpes-specific), susceptibility to, 6}	614850
ENSG00000101444	AHCY	Hypermethioninemia with deficiency of S-adenosylhomocysteine hydrolase	613752
ENSG00000111846	GCNT2	[Blood group, Ii]	110800
ENSG00000111846	GCNT2	Adult i phenotype without cataract	110800
ENSG00000111846	GCNT2	Cataract 13 with adult i phenotype	116700
ENSG00000110435	PDHX	Lacticacidemia due to PDX1 deficiency	245349
ENSG00000167114	SLC27A4	Ichthyosis prematurity syndrome	608649
ENSG00000163069	SGCB	Muscular dystrophy, limb-girdle, autosomal recessive 4	604286
ENSG00000065000	AP3D1	?Hermansky-Pudlak syndrome 10	617050
ENSG00000144647	POMGNT2	Muscular dystrophy-dystroglycanopathy (congenital with brain and eye anomalies, type A, 8	614830
ENSG00000144647	POMGNT2	Muscular dystrophy-dystroglycanopathy (limb-girdle) type C, 8	618135
ENSG00000187017	ESPN	?Usher syndrome, type 1M	618632
ENSG00000187017	ESPN	Deafness, autosomal recessive 36	609006
ENSG00000187017	ESPN	Deafness, neurosensory, without vestibular involvement, autosomal dominant	609006
ENSG00000198719	DLL1	Neurodevelopmental disorder with nonspecific brain abnormalities and with or without seizures	618709
ENSG00000148384	INPP5E	Joubert syndrome 1	213300
ENSG00000148384	INPP5E	Mental retardation, truncal obesity, retinal dystrophy, and micropenis	610156
ENSG00000187796	CARD9	Candidiasis, familial, 2, autosomal recessive	212050
ENSG00000142599	RERE	Neurodevelopmental disorder with or without anomalies of the brain, eye, or heart	616975
ENSG00000197971	MBP	{Chronic infections, due to MBL deficiency}	614372
ENSG00000111669	TPI1	Hemolytic anemia due to triosephosphate isomerase deficiency	615512
ENSG00000106153	CHCHD2	Parkinson disease 22, autosomal dominant	616710
ENSG00000139567	ACVRL1	Telangiectasia, hereditary hemorrhagic, type 2	600376
ENSG00000015475	BID	Short stature, brachydactyly, intellectual developmental disability, and seizures	617157
ENSG00000006744	ELAC2	{Prostate cancer, hereditary, 2, susceptibility to}	614731
ENSG00000006744	ELAC2	Combined oxidative phosphorylation deficiency 17	615440
ENSG00000187045	TMPRSS6	Iron-refractory iron deficiency anemia	206200
ENSG00000123607	TTC21B	Nephronophthisis 12	613820
ENSG00000123607	TTC21B	Short-rib thoracic dysplasia 4 with or without polydactyly	613819
ENSG00000180228	PRKRA	Dystonia 16	612067
ENSG00000167711	SERPINF2	Alpha-2-plasmin inhibitor deficiency	262850
ENSG00000175115	PACS1	Schuurs-Hoeijmakers syndrome	615009
ENSG00000152620	NADK2	2,4-dienoyl-CoA reductase deficiency	616034
ENSG00000133104	SPG20	Troyer syndrome	275900
ENSG00000141837	CACNA1A	Epileptic encephalopathy, early infantile, 42	617106
ENSG00000141837	CACNA1A	Episodic ataxia, type 2	108500
ENSG00000141837	CACNA1A	Migraine, familial hemiplegic, 1	141500
ENSG00000141837	CACNA1A	Migraine, familial hemiplegic, 1, with progressive cerebellar ataxia	141500
ENSG00000141837	CACNA1A	Spinocerebellar ataxia 6	183086
ENSG00000112182	BACH2	Immunodeficiency 60	618394
ENSG00000160712	IL6R	[Interleukin 6, serum level of, QTL]	614752
ENSG00000160712	IL6R	[Interleukin-6 receptor, soluble, serum level of, QTL]	614689
ENSG00000127415	IDUA	Mucopolysaccharidosis Ih	607014
ENSG00000127415	IDUA	Mucopolysaccharidosis Ih/s	607015
ENSG00000127415	IDUA	Mucopolysaccharidosis Is	607016
ENSG00000165006	UBAP1	Spastic paraplegia 80, autosomal dominant	618418
ENSG00000138160	KIF11	Microcephaly with or without chorioretinopathy, lymphedema, or mental retardation	152950
ENSG00000156171	DRAM2	Cone-rod dystrophy 21	616502
ENSG00000116711	PLA2G4A	Gastrointestinal ulceration, recurrent, with dysfunctional platelets	618372
ENSG00000074071	MRPS34	Combined oxidative phosphorylation deficiency 32	617664
ENSG00000145354	CISD2	Wolfram syndrome 2	604928
ENSG00000124614	RPS10	Diamond-Blackfan anemia 9	613308
ENSG00000122359	ANXA11	Amytrophic lateral sclerosis 23	617839
ENSG00000170266	GLB1	GM1-gangliosidosis, type I	230500
ENSG00000170266	GLB1	GM1-gangliosidosis, type II	230600
ENSG00000170266	GLB1	GM1-gangliosidosis, type III	230650
ENSG00000170266	GLB1	Mucopolysaccharidosis type IVB (Morquio)	253010
ENSG00000166347	CYB5A	Methemoglobinemia and ambiguous genitalia	250790
ENSG00000171503	ETFDH	Glutaric acidemia IIC	231680
ENSG00000181804	SLC9A9	{?Autism susceptibility 16}	613410
ENSG00000106009	BRAT1	Neurodevelopmental disorder with cerebellar atrophy and with or without seizures	618056
ENSG00000106009	BRAT1	Rigidity and multifocal seizure syndrome, lethal neonatal	614498
ENSG00000160299	PCNT	Nephrotic syndrome, type 17	618176
ENSG00000160299	PCNT	Microcephalic osteodysplastic primordial dwarfism, type II	210720
ENSG00000141013	GAS8	Ciliary dyskinesia, primary, 33	616726
ENSG00000112592	TBP	{Parkinson disease, susceptibility to}	168600
ENSG00000112592	TBP	Spinocerebellar ataxia 17	607136
ENSG00000112592	TBP	{Endometrial cancer, familial}	608089
ENSG00000112592	TBP	Colorectal cancer, hereditary nonpolyposis, type 5	614350
ENSG00000112592	TBP	Mismatch repair cancer syndrome	276300
ENSG00000137841	PLCB2	Platelet PLC beta-2 deficiency	NA
ENSG00000198799	LRIG2	Urofacial syndrome 2	615112
ENSG00000137275	RIPK1	Autoinflammation with episodic fever and lymphadenopathy	618852
ENSG00000137275	RIPK1	Immunodeficiency 57 with autoinflammation	618108
ENSG00000137267	TUBB2A	Cortical dysplasia, complex, with other brain malformations 5	615763
ENSG00000125814	NAPB	Amyotrophy, hereditary neuralgic	162100
ENSG00000111276	CDKN1B	Multiple endocrine neoplasia, type IV	610755
ENSG00000137713	PPP2R1B	Lung cancer, somatic	211980
ENSG00000105568	PPP2R1A	Mental retardation, autosomal dominant 36	616362
ENSG00000123191	ATP7B	Wilson disease	277900
ENSG00000143226	FCGR2A	{Lupus nephritis, susceptibility to}	152700
ENSG00000143226	FCGR2A	{Malaria, severe, susceptibility to}	611162
ENSG00000143226	FCGR2A	{Pseudomonas aeruginosa, susceptibility to chronic infection by, in cystic fibrosis}	219700
ENSG00000042317	SPATA7	Leber congenital amaurosis 3	604232
ENSG00000042317	SPATA7	Retinitis pigmentosa, juvenile, autosomal recessive	604232
ENSG00000116133	DHCR24	Desmosterolosis	602398
ENSG00000185100	ADSSL1	Myopathy, distal, 5	617030
ENSG00000151503	NCAPD3	Microcephaly 22, primary, autosomal recessive	617984
ENSG00000073578	SDHA	Cardiomyopathy, dilated, 1GG	613642
ENSG00000073578	SDHA	Leigh syndrome	256000
ENSG00000073578	SDHA	Mitochondrial respiratory chain complex II deficiency	252011
ENSG00000073578	SDHA	Paragangliomas 5	614165
ENSG00000174227	PIGG	Mental retardation, autosomal recessive 53	616917
ENSG00000040531	CTNS	Cystinosis, atypical nephropathic	219800
ENSG00000040531	CTNS	Cystinosis, late-onset juvenile or adolescent nephropathic	219900
ENSG00000040531	CTNS	Cystinosis, nephropathic	219800
ENSG00000040531	CTNS	Cystinosis, ocular nonnephropathic	219750
ENSG00000184381	PLA2G6	Infantile neuroaxonal dystrophy 1	256600
ENSG00000184381	PLA2G6	Neurodegeneration with brain iron accumulation 2B	610217
ENSG00000184381	PLA2G6	Parkinson disease 14, autosomal recessive	612953
ENSG00000186716	BCR	Leukemia, acute lymphocytic, Philadelphia chromosome positive, somatic	613065
ENSG00000186716	BCR	Leukemia, chronic myeloid, Philadelphia chromosome positive, somatic	608232
ENSG00000124164	VAPB	Amyotrophic lateral sclerosis 8	608627
ENSG00000124164	VAPB	Spinal muscular atrophy, late-onset, Finkel type	182980
ENSG00000101152	DNAJC5	Ceroid lipofuscinosis, neuronal, 4, Parry type	162350
ENSG00000117480	FAAH	{Drug addiction, susceptibility to}	606581
ENSG00000117480	FAAH	Spastic paraplegia 35, autosomal recessive	612319
ENSG00000085998	POMGNT1	Muscular dystrophy-dystroglycanopathy (congenital with brain and eye anomalies), type A, 3	253280
ENSG00000085998	POMGNT1	Muscular dystrophy-dystroglycanopathy (congenital with mental retardation), type B, 3	613151
ENSG00000085998	POMGNT1	Muscular dystrophy-dystroglycanopathy (limb-girdle), type C, 3	613157
ENSG00000085998	POMGNT1	Retinitis pigmentosa 76	617123
ENSG00000168646	AXIN2	Colorectal cancer, somatic	114500
ENSG00000168646	AXIN2	Oligodontia-colorectal cancer syndrome	608615
ENSG00000047578	KIAA0556	Joubert syndrome 26	616784
ENSG00000113161	HMGCR	[Low density lipoprotein cholesterol level QTL 3]	NA
ENSG00000113161	HMGCR	[Statins, attenuated cholesterol lowering by]	NA
ENSG00000161653	NAGS	N-acetylglutamate synthase deficiency	237310
ENSG00000185760	KCNQ5	Mental retardation, autosomal dominant 46	617601
ENSG00000105372	RPS19	Diamond-Blackfan anemia 1	105650
ENSG00000131187	F12	Angioedema, hereditary, type III	610618
ENSG00000131187	F12	Factor XII deficiency	234000
ENSG00000101365	IDH3B	Retinitis pigmentosa 46	612572
ENSG00000150540	HNMT	{Asthma, susceptibility to}	600807
ENSG00000150540	HNMT	Mental retardation, autosomal recessive 51	616739
ENSG00000122643	NT5C3A	Anemia, hemolytic, due to UMPH1 deficiency	266120
ENSG00000182372	CLN8	Ceroid lipofuscinosis, neuronal, 8	600143
ENSG00000182372	CLN8	Ceroid lipofuscinosis, neuronal, 8, Northern epilepsy variant	610003
ENSG00000109501	WFS1	?Cataract 41	116400
ENSG00000109501	WFS1	{Diabetes mellitus, noninsulin-dependent, association with}	125853
ENSG00000109501	WFS1	Deafness, autosomal dominant 6/14/38	600965
ENSG00000109501	WFS1	Wolfram syndrome 1	222300
ENSG00000109501	WFS1	Wolfram-like syndrome, autosomal dominant	614296
ENSG00000048392	RRM2B	Mitochondrial DNA depletion syndrome 8A (encephalomyopathic type with renal tubulopathy)	612075
ENSG00000048392	RRM2B	Mitochondrial DNA depletion syndrome 8B (MNGIE type)	612075
ENSG00000048392	RRM2B	Progressive external ophthalmoplegia with mitochondrial DNA deletions, autosomal dominant 5	613077
ENSG00000153107	ANAPC1	Rothmund-Thomson syndrome, type 1	618625
ENSG00000168827	GFM1	Combined oxidative phosphorylation deficiency 1	609060
ENSG00000125863	MKKS	Bardet-Biedl syndrome 6	605231
ENSG00000125863	MKKS	McKusick-Kaufman syndrome	236700
ENSG00000116062	MSH6	{Endometrial cancer, familial}	608089
ENSG00000116062	MSH6	Colorectal cancer, hereditary nonpolyposis, type 5	614350
ENSG00000116062	MSH6	Mismatch repair cancer syndrome	276300
ENSG00000163755	HPS3	Hermansky-Pudlak syndrome 3	614072
ENSG00000163754	GYG1	?Glycogen storage disease XV	613507
ENSG00000163754	GYG1	Polyglucosan body myopathy 2	616199
ENSG00000177370	TIMM22	?Combined oxidative phosphorylation deficiency 43	618851
ENSG00000110367	DDX6	Intellectual developmental disorder with impaired language and dysmorphic facies	618653
ENSG00000157978	LDLRAP1	Hypercholesterolemia, familial, 4	603813
ENSG00000105048	TNNT1	Nemaline myopathy 5, Amish type	605355
ENSG00000073921	PICALM	Leukemia, acute myeloid, somatic	601626
ENSG00000118046	STK11	Melanoma, malignant, somatic	NA
ENSG00000118046	STK11	Pancreatic cancer, somatic	260350
ENSG00000118046	STK11	Peutz-Jeghers syndrome	175200
ENSG00000118046	STK11	Testicular tumor, somatic	273300
ENSG00000113273	ARSB	Mucopolysaccharidosis type VI (Maroteaux-Lamy)	253200
ENSG00000060237	WNK1	Neuropathy, hereditary sensory and autonomic, type II	201300
ENSG00000060237	WNK1	Pseudohypoaldosteronism, type IIC	614492
ENSG00000168028	RPSA	Asplenia, isolated congenital	271400
ENSG00000185527	PDE6G	Retinitis pigmentosa 57	613582
ENSG00000187726	DNAJB13	Ciliary dyskinesia, primary, 34	617091
ENSG00000198513	ATL1	Neuropathy, hereditary sensory, type ID	613708
ENSG00000198513	ATL1	Spastic paraplegia 3A, autosomal dominant	182600
